# Supplementary material for: Mice Fed Rapamycin Have an Increase in Lifespan Associated with Major Changes in the Liver Transcriptome
Source: PLoS One. 2014 Jan 7;9(1):e83988. doi: 10.1371/journal.pone.0083988 (PMC3883653; doi:10.1371/journal.pone.0083988)
Supplement: File S1 — Supporting information file containing Figures S1–S7, Tables S1–S4, supplementary methods, and detail descriptions of the tabs in File 2, 3, and 4. Figure S1: Body weight data for mice from 5 to 21 months of age. Figure S2: Food consumption data for mice from 5 to 24 months of age. Table S1: Survival analysis of C57BL/6 mice fed Rapamycin. Table S2: Fitted Gompertz Mortality Models. Table S3: Tissue Weights at 25 months of age. Figure S3: Phosphorylated S6/Total S6 ratio shows no change among all the groups. Figure S4: Gene analysis shows that Rapa-2 males share many genes that change in Rapa Female mice. Figure S5: Validation of genes in the mitochondria dysfunction and estrogen receptor signaling pathways. Table S4: Gene enrichment analysis using DAVID bioinformatics resources. Figure S6: Gene analysis shows significant gene changes in 6-months Rapa female mice. Figure S7: Fibroblasts pretreated with Rapa are more sensitive to oxidative stressors. (XLSX) [file pone.0083988.s001.xlsx]

## Sheet: 1. Genes-Chronic Rapa
order	SYMBOL	Group (adj_p<0.05 + 15% change, Rapa-1 Male Long vs. Rapa Female Long)	Group (adj_p<0.05 + 15% change, Rapa-2 Male Long vs. Rapa Female Long)	Rapa-1Male/ Control Male log2Ratio	Rapa-2 Male/ Control Male log2Ratio	Rapa Female/ Control Female log2Ratio	Rapa-1 Male/ Control Male p-value	Rapa-2 Male/ Control Male p-value	Rapa Female/ Control Female p-value	Rapa-1 Male/ Control Male adjusted p-value	Rapa-2 Male/ Control Male adjusted p-value	Rapa Female/ Control Female adjusted p-value	Illumina ID	definition
1	ACTB	R1ML0 RFL+	R2ML0 RFL+	0.371376	-0.379219	0.854036	0.225708	0.253539	0.00764363	0.743717	0.444511	0.027651	ILMN_2846865	Mus musculus actin, beta, cytoplasmic (Actb), mRNA.
2	ACTB	R1ML0 RFL+	R2ML0 RFL+	0.400714	-0.36	0.814086	0.174515	0.255991	0.00714926	0.705259	0.447405	0.0262187	ILMN_2588055	Mus musculus actin, beta, cytoplasmic (Actb), mRNA.
3	1700123O20RIK	R1ML0 RFL+	R2ML0 RFL+	0.176511	0.113535	0.222012	0.00827212	0.117245	0.00012125	0.343091	0.269726	0.0008966	ILMN_2597332	Mus musculus RIKEN cDNA 1700123O20 gene (1700123O20Rik), mRNA.
4	LRRC46	R1ML0 RFL+	R2ML0 RFL+	0.0779398	-0.0324649	0.16731	0.116791	0.449763	7.55e-06	0.6586	0.634647	8.857e-05	ILMN_2737412	Mus musculus leucine rich repeat containing 46 (Lrrc46), mRNA.
5	ZCCHC9	R1ML0 RFL+	R2ML- RFL+	0.0694662	-0.235439	0.18136	0.0901615	0.00234787	0.00112882	0.624141	0.0159128	0.0056799	ILMN_2503329
6	1110012D08RIK	R1ML0 RFL+	R2ML0 RFL+	0.0416692	0.0935263	0.429372	0.63517	0.220326	3.5e-07	0.923233	0.406294	6.98e-06	ILMN_1221251	Mus musculus RIKEN cDNA 1110012D08 gene (1110012D08Rik), mRNA.
7	CTNNB1	R1ML0 RFL+	R2ML0 RFL+	0.0843459	0.128632	0.483375	0.379054	0.164556	4.372e-05	0.836653	0.337962	0.00037878	ILMN_2616556
8	SPNA1	R1ML0 RFL+	R2ML0 RFL+	0.0194135	0.0568421	0.208685	0.455099	0.0879086	3.02e-06	0.868395	0.222439	4.094e-05	ILMN_2662527
9	PACSIN1	R1ML0 RFL+	R2ML0 RFL+	0.0180902	0.107447	0.212545	0.63627	0.0115223	1.65e-06	0.923233	0.0516372	2.512e-05	ILMN_3074180	Mus musculus protein kinase C and casein kinase substrate in neurons 1 (Pacsin1), mRNA.
10	1700113O17RIK	R1ML0 RFL+	R2ML0 RFL+	0.00490977	0.072886	0.213033	0.863798	0.0896701	5.91e-06	0.973639	0.225141	7.197e-05	ILMN_2689749	Mus musculus RIKEN cDNA 1700113O17 gene (1700113O17Rik), mRNA.
11	9630028B13RIK	R1ML0 RFL+	R2ML+ RFL+	0.10006	0.159465	0.283967	0.146129	4.189e-05	2e-07	0.68572	0.00060745	4.35e-06	ILMN_2857095	Mus musculus RIKEN cDNA 9630028B13 gene (9630028B13Rik), mRNA.
12	BC005624	R1ML0 RFL+	R2ML0 RFL+	0.0659774	0.123596	0.33261	0.192846	0.00340807	3e-08	0.719973	0.0210522	1.05e-06	ILMN_1248400	Mus musculus cDNA sequence BC005624 (BC005624), mRNA.
13	THEG	R1ML0 RFL+	R2ML0 RFL+	0.0321654	0.0212368	0.258295	0.44938	0.518698	1.04e-06	0.865911	0.691338	1.721e-05	ILMN_3100258	Mus musculus testicular haploid expressed gene (Theg), transcript variant 2, mRNA.
14	AI987944	R1ML0 RFL+	R2ML0 RFL+	0.0515564	0.0956754	0.232488	0.0663922	0.0380661	1.62e-06	0.579579	0.123868	2.483e-05	ILMN_2673099
15	CNP	R1ML0 RFL+	R2ML0 RFL+	0.0351805	0.107895	0.238693	0.461943	0.0271236	1.11e-06	0.871386	0.0966707	1.807e-05	ILMN_1257097	Mus musculus 2',3'-cyclic nucleotide 3' phosphodiesterase (Cnp), mRNA.
16	OLFR724	R1ML0 RFL+	R2ML0 RFL+	0.0585263	0.097693	0.300057	0.238285	0.105933	0	0.75474	0.252144	2.1e-07	ILMN_1218277	Mus musculus olfactory receptor 724 (Olfr724), mRNA.
17	ZBP1	R1ML0 RFL+	R2ML0 RFL+	0.041406	0.0730965	0.237277	0.480867	0.0951046	3.36e-06	0.877304	0.234627	4.488e-05	ILMN_2879614	Mus musculus Z-DNA binding protein 1 (Zbp1), mRNA.
18	HOXA13	R1ML0 RFL+	R2ML0 RFL+	0.0350677	0.124044	0.262321	0.495012	0.0185381	2.34e-06	0.883188	0.0731082	3.337e-05	ILMN_3087004	Mus musculus homeo box A13 (Hoxa13), mRNA.
19	KPNA6	R1ML0 RFL+	R2ML0 RFL+	0.0478271	0.134518	0.245387	0.498055	0.0163711	3e-08	0.885126	0.0668606	1.04e-06	ILMN_2667404
20	SOX12	R1ML0 RFL+	R2ML0 RFL+	0.0401429	0.0415	0.234908	0.395047	0.179767	2e-08	0.844552	0.357378	6.6e-07	ILMN_3099470	Mus musculus SRY-box containing gene 12 (Sox12), mRNA.
21	B930011P16RIK	R1ML0 RFL+	R2ML+ RFL+	0.014391	0.177272	0.190131	0.652891	1.2e-07	6.39e-06	0.926748	3.91e-06	7.679e-05	ILMN_2627619	Mus musculus RIKEN cDNA B930011P16 gene (B930011P16Rik), mRNA.
22	GFER	R1ML0 RFL+	R2ML+ RFL+	0.134714	0.430833	0.572327	0.249469	2.1e-07	4e-08	0.763127	6.12e-06	1.16e-06	ILMN_1219169
23	MED8	R1ML0 RFL+	R2ML+ RFL+	0.0878195	0.314439	0.533732	0.239278	0.00226345	0	0.755628	0.0155062	1.9e-07	ILMN_2672208
24	RABIF	R1ML0 RFL+	R2ML+ RFL+	-0.0720677	0.395289	0.408101	0.246169	5.832e-05	1.1e-07	0.760901	0.00080361	2.68e-06	ILMN_2672997	Mus musculus RAB interacting factor (Rabif), mRNA.
25	PNKP	R1ML0 RFL+	R2ML+ RFL+	-0.0093985	0.254649	0.295283	0.906233	0.00248584	7.518e-05	0.98318	0.0165703	0.00059848	ILMN_2719620
26	TUBG1	R1ML0 RFL+	R2ML+ RFL+	-0.0410677	0.307956	0.525018	0.611708	0.00017308	8.3e-07	0.91568	0.00198736	1.416e-05	ILMN_2420070
27	NDE1	R1ML0 RFL+	R2ML+ RFL+	0.0691278	0.324175	0.308845	0.119231	0.00053613	0	0.660071	0.00499711	1.5e-07	ILMN_2690077
28	OVOL2	R1ML0 RFL+	R2ML+ RFL+	0.0436541	0.203035	0.212568	0.310982	0.0060633	2.32e-06	0.799176	0.0325008	3.317e-05	ILMN_3131909	Mus musculus ovo-like 2 (Drosophila) (Ovol2), transcript variant B, mRNA.
29	NECAP1	R1ML0 RFL+	R2ML+ RFL+	-0.0666466	0.256877	0.423476	0.28968	0.0054326	5e-08	0.787522	0.0300671	1.43e-06	ILMN_2854878	Mus musculus NECAP endocytosis associated 1 (Necap1), mRNA.
30	NRBF2	R1ML0 RFL+	R2ML+ RFL+	0.0680376	0.295561	0.505152	0.49723	9e-08	3.8e-07	0.884672	2.84e-06	7.46e-06	ILMN_2837888	Mus musculus nuclear receptor binding factor 2 (Nrbf2), mRNA.
31	NUBP2	R1ML0 RFL+	R2ML+ RFL+	-0.00314286	0.255167	0.171152	0.953929	0.00107363	5.5e-06	0.99045	0.00873348	6.782e-05	ILMN_2925570	Mus musculus nucleotide binding protein 2 (Nubp2), mRNA.
32	KLF16	R1ML0 RFL+	R2ML+ RFL+	0.0467594	0.284474	0.303384	0.329202	7.6e-07	0	0.810043	1.936e-05	5e-08	ILMN_2889916	Mus musculus Kruppel-like factor 16 (Klf16), mRNA.
33	PSCA	R1ML0 RFL+	R2ML+ RFL+	0.0785338	0.184105	0.184997	0.197045	0.00123661	1.27e-06	0.722436	0.0098138	2.017e-05	ILMN_2713055	Mus musculus prostate stem cell antigen (Psca), mRNA.
34	EVX1	R1ML0 RFL+	R2ML+ RFL+	0.0763383	0.166719	0.155039	0.00932809	0.00321511	0.00016171	0.357278	0.0200677	0.00113534	ILMN_2731113	Mus musculus even skipped homeotic gene 1 homolog (Evx1), mRNA.
35	PIWIL1	R1ML0 RFL+	R2ML0 RFL+	0.0476241	0.116386	0.194071	0.15456	0.00178315	2.603e-05	0.691985	0.0129476	0.00024554	ILMN_2781611	Mus musculus piwi-like homolog 1 (Drosophila) (Piwil1), mRNA.
36	F730047E07RIK	R1ML0 RFL+	R2ML0 RFL+	0.0364436	0.0564912	0.155961	0.144733	0.0358271	3.72e-06	0.68485	0.11864	4.908e-05	ILMN_2730957	Mus musculus RIKEN cDNA F730047E07 gene (F730047E07Rik), mRNA.
37	FRAT1	R1ML0 RFL+	R2ML0 RFL+	0.0201278	0.135842	0.313152	0.627154	0.0511245	0	0.920116	0.151948	5e-08	ILMN_1227593	Mus musculus frequently rearranged in advanced T-cell lymphomas (Frat1), mRNA.
38	OLFR982	R1ML0 RFL+	R2ML0 RFL+	0.0273383	0.109553	0.221646	0.494986	0.00575397	7.2e-07	0.883188	0.0313619	1.268e-05	ILMN_2698350	Mus musculus olfactory receptor 982 (Olfr982), mRNA.
39	E030010A14RIK	R1ML0 RFL+	R2ML0 RFL+	0.034812	0.0630263	0.167792	0.318673	0.0389563	1.578e-05	0.802908	0.126015	0.00016222	ILMN_2599686
40	NFASC	R1ML0 RFL+	R2ML0 RFL+	0.0245789	0.0424123	0.194098	0.52325	0.203575	5.9e-07	0.891937	0.387358	1.071e-05	ILMN_2620224
41	1700072E05RIK	R1ML0 RFL0	R2ML+ RFL0	-0.00354135	0.152982	0.127914	0.900526	0.00049596	7.048e-05	0.981719	0.00469401	0.00056743	ILMN_3080550	Mus musculus RIKEN cDNA 1700072E05 gene (1700072E05Rik), mRNA.
42	SOX21	R1ML0 RFL+	R2ML0 RFL+	-0.0256165	0.106193	0.154298	0.550106	0.0111411	5.984e-05	0.898156	0.0504479	0.00049272	ILMN_1254295	Mus musculus SRY-box containing gene 21 (Sox21), mRNA.
43	OLFR272	R1ML0 RFL+	R2ML0 RFL+	-0.0356767	0.115061	0.160952	0.196211	0.0046387	3.9e-07	0.721966	0.0267386	7.64e-06	ILMN_2758092	Mus musculus olfactory receptor 272 (Olfr272), mRNA.
44	4632434I11RIK	R1ML0 RFL+	R2ML+ RFL+	-0.0260075	0.204254	0.232491	0.440606	1.83e-06	6.9e-07	0.862066	4.168e-05	1.227e-05	ILMN_2660829
45	OLFR270	R1ML0 RFL+	R2ML0 RFL+	-0.00757143	0.0338333	0.174414	0.82726	0.51624	2.6e-06	0.965344	0.689456	3.632e-05	ILMN_2682548	Mus musculus olfactory receptor 270 (Olfr270), mRNA.
46	SPIRE1	R1ML0 RFL+	R2ML+ RFL+	0.027812	0.18186	0.154033	0.354735	5e-07	0.00038242	0.821902	1.349e-05	0.00232873	ILMN_2767539
47	GPHB5	R1ML0 RFL+	R2ML0 RFL+	-7.5188e-05	0.143711	0.16389	0.993895	0.00058525	1.363e-05	0.999141	0.00534818	0.00014322	ILMN_1245716
48	PXT1	R1ML0 RFL+	R2ML+ RFL+	0.0396692	0.192526	0.161265	0.279017	0.0001765	0.00027321	0.781035	0.00201844	0.0017537	ILMN_2663291	Mus musculus peroxisomal, testis specific 1 (Pxt1), mRNA.
49	V1RA2	R1ML0 RFL+	R2ML0 RFL+	0.0527444	0.146149	0.184449	0.173052	0.00119328	1.654e-05	0.70403	0.0095288	0.00016886	ILMN_1249741
50	PFN2	R1ML0 RFL+	R2ML0 RFL+	0.0314436	0.116325	0.187074	0.416809	0.0153159	0.000988	0.852655	0.0636512	0.00510012	ILMN_1235670	Mus musculus profilin 2 (Pfn2), mRNA.
51	ACYP1	R1ML0 RFL+	R2ML+ RFL+	-0.0324887	0.155035	0.164842	0.311452	0.0109914	0.00027819	0.799618	0.049975	0.00177957	ILMN_2640961	Mus musculus acylphosphatase 1, erythrocyte (common) type (Acyp1), mRNA.
52	PTPRR	R1ML0 RFL+	R2ML+ RFL+	0.00232331	0.162228	0.153152	0.933039	0.00234327	3.56e-06	0.986921	0.0159022	4.732e-05	ILMN_2706730	Mus musculus protein tyrosine phosphatase, receptor type, R (Ptprr), mRNA.
53	4930544G11RIK	R1ML0 RFL+	R2ML0 RFL+	0.0249023	0.164307	0.214324	0.647132	0.0142407	9.886e-05	0.926377	0.0602466	0.00075291	ILMN_1233275	Mus musculus RIKEN cDNA 4930544G11 gene (4930544G11Rik), mRNA.
54	KRTAP8-2	R1ML0 RFL+	R2ML0 RFL+	-0.0328496	0.142412	0.16072	0.368236	0.00034043	1.778e-05	0.830482	0.00347005	0.00017931	ILMN_2594119
55	ZFAND1	R1ML0 RFL+	R2ML0 RFL+	0.0386541	0.0817018	0.187205	0.220548	0.0540308	0.000217	0.739814	0.15783	0.00144761	ILMN_2660056	Mus musculus zinc finger, AN1-type domain 1 (Zfand1), mRNA.
56	ACOT2	R1ML0 RFL+	R2ML0 RFL+	0.0738421	0.0930088	0.248762	0.0975922	0.0540289	6.7e-07	0.636171	0.15783	1.195e-05	ILMN_2840492	Mus musculus acyl-CoA thioesterase 2 (Acot2), mRNA.
57	KCNJ3	R1ML0 RFL+	R2ML0 RFL+	0.0157368	0.0430702	0.168708	0.65318	0.184138	0.0002918	0.926748	0.362868	0.00185558	ILMN_2714252
58	TRCG1	R1ML0 RFL+	R2ML0 RFL+	-0.0276767	0.0470614	0.218068	0.402675	0.102638	9.54e-06	0.846905	0.246929	0.0001072	ILMN_3162445	Mus musculus taste receptor protein 1 (Trcg1), mRNA.
59	A430083B19RIK	R1ML0 RFL+	R2ML0 RFL+	0.0167594	0.145807	0.209277	0.680896	0.00011469	9.42e-06	0.932242	0.0014252	0.00010609	ILMN_1240287	Mus musculus RIKEN cDNA A430083B19 gene (A430083B19Rik), mRNA.
60	ACYP2	R1ML0 RFL+	R2ML+ RFL+	0.0406617	0.181114	0.308173	0.209834	0.00136634	6e-07	0.73089	0.0105915	1.085e-05	ILMN_2636803	Mus musculus acylphosphatase 2, muscle type (Acyp2), mRNA.
61	WDR13	R1ML0 RFL+	R2ML+ RFL+	0.0403083	0.205237	0.39161	0.458429	0.00506726	6e-08	0.869455	0.0284993	1.56e-06	ILMN_2435521
62	CCDC65	R1ML0 RFL+	R2ML+ RFL+	0.0815639	0.266754	0.385378	0.157433	0.00132693	2.15e-06	0.69434	0.0103705	3.137e-05	ILMN_2595469	Mus musculus coiled-coil domain containing 65 (Ccdc65), mRNA.
63	UBOX5	R1ML0 RFL+	R2ML+ RFL+	0.0705789	0.275912	0.457113	0.275724	0.00025752	5.49e-06	0.77843	0.002763	6.765e-05	ILMN_2635377	Mus musculus U box domain containing 5 (Ubox5), mRNA.
64	MRGPRA2	R1ML0 RFL+	R2ML0 RFL+	0.0299323	0.148623	0.391536	0.594152	0.00488823	1.8e-07	0.908942	0.0277597	4.15e-06	ILMN_1237571
65	STXBP5L	R1ML0 RFL+	R2ML0 RFL+	0.0545113	0.192368	0.324896	0.258596	0.0191606	1.19e-06	0.767708	0.0748623	1.916e-05	ILMN_3000703	Mus musculus syntaxin binding protein 5-like (Stxbp5l), mRNA.
66	BXDC5	R1ML0 RFL+	R2ML0 RFL+	0.0293233	0.135228	0.254902	0.518744	0.00960944	2.3e-06	0.891608	0.045434	3.298e-05	ILMN_1213929	Mus musculus brix domain containing 5 (Bxdc5), transcript variant 1, mRNA.
67	OLFR538	R1ML0 RFL+	R2ML0 RFL+	0.055594	0.0774035	0.27244	0.335319	0.0229005	5.01e-06	0.812892	0.0851912	6.293e-05	ILMN_2919824	Mus musculus olfactory receptor 538 (Olfr538), mRNA.
68	GNAO1	R1ML0 RFL+	R2ML0 RFL+	0.0409173	0.0746316	0.292021	0.291168	0.0161002	3e-06	0.787522	0.0661223	4.085e-05	ILMN_2773191
69	DMTF1	R1ML0 RFL+	R2ML0 RFL+	0.0182632	0.120096	0.168509	0.584545	0.0400457	0.00116783	0.907451	0.128295	0.00584645	ILMN_2725672	Mus musculus cyclin D binding myb-like transcription factor 1 (Dmtf1), mRNA.
70	ZFP622	R1ML0 RFL+	R2ML0 RFL+	0.0295113	0.131702	0.19628	0.423493	0.0155882	4.435e-05	0.856398	0.0644624	0.00038338	ILMN_1235380	Mus musculus zinc finger protein 622 (Zfp622), mRNA.
71	HARS	R1ML0 RFL+	R2ML0 RFL+	0.0642932	0.138246	0.191631	0.131643	7.168e-05	0.00014986	0.673607	0.00095473	0.00106796	ILMN_2769030	Mus musculus histidyl-tRNA synthetase (Hars), mRNA.
72	EG384814	R1ML0 RFL+	R2ML+ RFL+	0.0673008	0.173325	0.229247	0.19164	8.56e-06	0.00013956	0.7186	0.00016153	0.00100736	ILMN_2965752	Mus musculus predicted gene, EG384814 (EG384814), mRNA.
73	OLFR378	R1ML0 RFL+	R2ML0 RFL+	0.0466842	0.163851	0.219423	0.291115	0.0249217	1.36e-05	0.787522	0.0906974	0.00014302	ILMN_2741070	Mus musculus olfactory receptor 378 (Olfr378), mRNA.
74	ZFP346	R1ML0 RFL+	R2ML0 RFL+	0.00511278	0.0860175	0.194086	0.906911	0.0197215	2.338e-05	0.98318	0.0764265	0.00022521	ILMN_2496664
75	ADARB1	R1ML0 RFL+	R2ML+ RFL+	0.0033985	0.162684	0.209696	0.943483	4.015e-05	3.639e-05	0.988752	0.00059084	0.00032541	ILMN_1243711
76	CNGA1	R1ML0 RFL+	R2ML0 RFL+	0.00426316	0.141263	0.253524	0.931561	2.424e-05	4.1e-07	0.986921	0.00038924	7.98e-06	ILMN_1219994
77	PRRX1	R1ML0 RFL+	R2ML0 RFL+	-0.0191805	0.0847719	0.15719	0.609068	0.0344638	0.00011798	0.914686	0.115345	0.00087698	ILMN_2678094
78	SLC38A2	R1ML0 RFL+	R2ML0 RFL+	0.0560301	0.103816	0.201381	0.192876	0.00441209	1.826e-05	0.719979	0.0257208	0.00018304	ILMN_2721692	Mus musculus solute carrier family 38, member 2 (Slc38a2), mRNA.
79	CCL11	R1ML0 RFL+	R2ML0 RFL+	-0.00651128	0.130632	0.166259	0.808774	2.049e-05	2.711e-05	0.961873	0.00033597	0.00025397	ILMN_2647757	Mus musculus small chemokine (C-C motif) ligand 11 (Ccl11), mRNA.
80	OLFR206	R1ML0 RFL+	R2ML0 RFL+	0.0296992	0.123675	0.164271	0.350656	0.00072944	1.95e-05	0.821206	0.00641057	0.00019381	ILMN_1260227	Mus musculus olfactory receptor 206 (Olfr206), mRNA.
81	LRRC50	R1ML0 RFL0	R2ML+ RFL0	0.018609	0.163895	0.129461	0.671958	2.176e-05	0.00067381	0.930354	0.00035388	0.00372043	ILMN_2845744	Mus musculus leucine rich repeat containing 50 (Lrrc50), mRNA.
82	SULT1D1	R1ML0 RFL+	R2ML0 RFL+	0.0159774	0.10343	0.162125	0.697334	0.0245526	0.00010998	0.935891	0.0896971	0.0008263	ILMN_2955850	Mus musculus sulfotransferase family 1D, member 1 (Sult1d1), mRNA.
83	EVI1	R1ML0 RFL+	R2ML+ RFL+	0.00984211	0.162175	0.185464	0.847353	0.00264554	3.828e-05	0.969779	0.0173513	0.00033916	ILMN_2668165	Mus musculus ecotropic viral integration site 1 (Evi1), mRNA.
84	OC90	R1ML0 RFL+	R2ML+ RFL+	0.0653308	0.16414	0.164423	0.0955703	0.00090218	5.3e-07	0.634264	0.00760105	9.86e-06	ILMN_1217077	Mus musculus otoconin 90 (Oc90), mRNA.
85	GM166	R1ML0 RFL0	R2ML+ RFL0	0.0303233	0.219395	0.143935	0.448582	5.28e-06	0.00024192	0.865584	0.00010669	0.00158365	ILMN_2953542	Mus musculus gene model 166, (NCBI) (Gm166), mRNA.
86	SLC1A7	R1ML0 RFL+	R2ML+ RFL+	-0.0223684	0.216298	0.168283	0.471966	0.00019228	0.00021596	0.874112	0.00216999	0.00144184	ILMN_2707789	Mus musculus solute carrier family 1 (glutamate transporter), member 7 (Slc1a7), mRNA.
87	PFKM	R1ML0 RFL+	R2ML+ RFL+	-0.0355414	0.155816	0.184872	0.362119	0.00287882	7.04e-06	0.826753	0.018485	8.345e-05	ILMN_1252214	Mus musculus phosphofructokinase, muscle (Pfkm), mRNA.
88	D6WSU116E	R1ML0 RFL+	R2ML+ RFL+	0.0566842	0.150351	0.153661	0.0607717	0.00030516	0.00122352	0.57228	0.00316704	0.0060849	ILMN_2686697	Mus musculus DNA segment, Chr 6, Wayne State University 116, expressed (D6Wsu116e), mRNA.
89	IFT140	R1ML0 RFL+	R2ML+ RFL+	0.0104737	0.17214	0.176402	0.771422	6e-08	0.0001041	0.954189	2.25e-06	0.00078774	ILMN_3137478	Mus musculus intraflagellar transport 140 homolog (Chlamydomonas) (Ift140), mRNA.
90	OLFR983	R1ML0 RFL0	R2ML+ RFL0	0.0384135	0.155342	0.147676	0.184725	0.00215678	0.00040317	0.711984	0.0149994	0.00243379	ILMN_1256987
91	CHRAC1	R1ML0 RFL+	R2ML+ RFL+	0.0252857	0.161167	0.169506	0.468863	0.00059056	5.12e-06	0.873104	0.00538718	6.39e-05	ILMN_1237667	Mus musculus chromatin accessibility complex 1 (Chrac1), mRNA.
92	RBM41	R1ML0 RFL+	R2ML0 RFL+	0.0475489	0.131096	0.164036	0.140946	0.00427781	8e-06	0.68341	0.0251032	9.3e-05	ILMN_1239385	Mus musculus RNA binding motif protein 41 (Rbm41), mRNA.
93	HIST1H1B	R1ML0 RFL+	R2ML+ RFL+	0.0737068	0.167921	0.208857	0.0536038	0.00013344	1.3e-07	0.557672	0.00161693	3.22e-06	ILMN_2664593	Mus musculus histone cluster 1, H1b (Hist1h1b), mRNA.
94	ZFP385C	R1ML0 RFL+	R2ML+ RFL+	0.0583233	0.159895	0.158333	0.161844	0.00027973	1.291e-05	0.697979	0.0029496	0.00013713	ILMN_1218859	Mus musculus RIKEN cDNA A930006D11Rik gene (A930006D11Rik), mRNA.
95	OLFR66	R1ML0 RFL+	R2ML0 RFL+	0.0260075	0.0525789	0.185857	0.26886	0.0715094	6.14e-06	0.774781	0.192517	7.434e-05	ILMN_1223084	Mus musculus olfactory receptor 66 (Olfr66), mRNA.
96	SLCO1A5	R1ML0 RFL+	R2ML0 RFL+	-0.011218	0.0713772	0.17578	0.717457	0.10647	1.777e-05	0.941548	0.252839	0.0001793	ILMN_1255691	Mus musculus solute carrier organic anion transporter family, member 1a5 (Slco1a5), mRNA.
97	SLITRK1	R1ML0 RFL+	R2ML0 RFL+	-0.00511278	0.0728158	0.185152	0.852861	0.0398088	1.566e-05	0.970973	0.127759	0.00016134	ILMN_2961282	Mus musculus SLIT and NTRK-like family, member 1 (Slitrk1), mRNA.
98	OLFR608	R1ML0 RFL+	R2ML0 RFL+	0.0201053	0.0529386	0.153318	0.608291	0.173165	3.725e-05	0.914616	0.349554	0.00033147	ILMN_1243468
99	4833436C18RIK	R1ML0 RFL+	R2ML+ RFL+	0.0093609	0.156289	0.196363	0.775407	0.00117003	1.435e-05	0.955345	0.00937516	0.00014992	ILMN_2692952	Mus musculus RIKEN cDNA 4833436C18 gene (4833436C18Rik), mRNA.
100	6030408B16RIK	R1ML0 RFL+	R2ML0 RFL+	0.0699925	0.0937544	0.196881	0.0485542	0.032431	0.00020033	0.54458	0.11029	0.00135367	ILMN_3125764	Mus musculus RIKEN cDNA 6030408B16 gene (6030408B16Rik), mRNA.
101	ADAM22	R1ML0 RFL+	R2ML0 RFL+	0.013797	0.111202	0.222521	0.712071	0.00284674	9.3e-07	0.940136	0.0183446	1.561e-05	ILMN_3134632	Mus musculus a disintegrin and metallopeptidase domain 22 (Adam22), transcript variant 1, mRNA.
102	MBD3L2	R1ML0 RFL+	R2ML+ RFL+	0.0171053	0.164439	0.272637	0.71376	9.686e-05	1.874e-05	0.940525	0.00123157	0.00018726	ILMN_2609129	Mus musculus methyl-CpG binding domain protein 3-like 2 (Mbd3l2), mRNA.
103	WFDC6A	R1ML0 RFL+	R2ML0 RFL+	0.0317218	0.138912	0.208818	0.407881	0.00231505	1.005e-05	0.848613	0.015754	0.00011208	ILMN_2883709	Mus musculus WAP four-disulfide core domain 6A (Wfdc6a), mRNA.
104	OLFR437	R1ML0 RFL+	R2ML0 RFL+	0.0421579	0.0409912	0.202685	0.273781	0.364182	7.58e-06	0.778293	0.557346	8.882e-05	ILMN_2625840	Mus musculus olfactory receptor 437 (Olfr437), mRNA.
105	ZFP628	R1ML0 RFL+	R2ML0 RFL+	-0.0124586	0.122851	0.175565	0.802119	0.0320211	0.00018203	0.960845	0.109334	0.00125404	ILMN_2503508	Mus musculus zinc finger protein 628 (Zfp628), mRNA.
106	U2AF2	R1ML0 RFL+	R2ML0 RFL+	0.0366316	0.0759649	0.181283	0.259377	0.0869756	4.465e-05	0.768153	0.220698	0.00038515	ILMN_2479300	Mus musculus U2 small nuclear ribonucleoprotein auxiliary factor (U2AF) 2 (U2af2), mRNA.
107	GM382	R1ML0 RFL+	R2ML0 RFL+	0.0217293	0.104658	0.165491	0.532437	0.0160433	2.269e-05	0.893938	0.0659412	0.00021974	ILMN_1259534
108	KTN1	R1ML0 RFL+	R2ML0 RFL+	-0.0372406	0.0709737	0.185009	0.11256	0.00521866	0.00010293	0.655735	0.0291151	0.00077998	ILMN_2631067	Mus musculus kinectin 1 (Ktn1), mRNA.
109	4930524E20RIK	R1ML0 RFL+	R2ML0 RFL+	0.0416617	0.0684474	0.159676	0.197848	0.136891	7.23e-06	0.722482	0.299352	8.539e-05	ILMN_3009928	Mus musculus RIKEN cDNA 4930524E20 gene (4930524E20Rik), mRNA.
110	6330500D04RIK	R1ML0 RFL+	R2ML0 RFL+	0.0448947	0.0907281	0.217125	0.279834	0.0118554	7.42e-06	0.781536	0.0527323	8.73e-05	ILMN_2758418
111	SLC4A3	R1ML0 RFL+	R2ML0 RFL+	0.0188496	0.121088	0.219009	0.633087	1.705e-05	2.459e-05	0.922864	0.00028747	0.00023455	ILMN_2675029	Mus musculus solute carrier family 4 (anion exchanger), member 3 (Slc4a3), mRNA.
112	HCN3	R1ML0 RFL+	R2ML0 RFL+	-0.039218	0.0813772	0.170298	0.216754	0.0253035	3.39e-06	0.736942	0.0917359	4.532e-05	ILMN_2808472	Mus musculus hyperpolarization-activated, cyclic nucleotide-gated K+ 3 (Hcn3), mRNA.
113	LRRFIP1	R1ML0 RFL+	R2ML0 RFL+	-0.0122707	0.0246579	0.162048	0.687667	0.368323	3.529e-05	0.933251	0.561488	0.00031714	ILMN_2647720	Mus musculus leucine rich repeat (in FLII) interacting protein 1 (Lrrfip1), mRNA.
114	RNF135	R1ML0 RFL+	R2ML+ RFL+	0.0951429	0.157	0.2725	0.141038	0.00597916	2.87e-06	0.68341	0.0321833	3.941e-05	ILMN_2655034	Mus musculus ring finger protein 135 (Rnf135), mRNA.
115	TRIM69	R1ML0 RFL+	R2ML0 RFL+	0.0302632	0.0635965	0.17561	0.300408	0.128075	3.986e-05	0.793775	0.28652	0.00035015	ILMN_1256486	Mus musculus tripartite motif-containing 69 (Trim69), mRNA.
116	41343	R1ML0 RFL+	R2ML0 RFL+	0.0283383	0.0477193	0.178994	0.443695	0.192627	5.325e-05	0.863792	0.373016	0.00044572	ILMN_3161404	Mus musculus ring finger protein 190 (Rnf190), mRNA.
117	PSPC1	R1ML0 RFL+	R2ML0 RFL+	0.0336992	0.0991754	0.193795	0.434418	0.00014621	9.347e-05	0.860009	0.00173947	0.00071762	ILMN_1238688
118	OLFR310	R1ML0 RFL+	R2ML0 RFL+	0.0461805	0.133728	0.159821	0.149998	0.0055893	4.988e-05	0.687567	0.0306911	0.00042207	ILMN_2886477	Mus musculus olfactory receptor 310 (Olfr310), mRNA.
119	OLFR910	R1ML0 RFL+	R2ML+ RFL+	0.0566842	0.233851	0.164881	0.0381278	0.00037701	0.00027502	0.5134	0.00376381	0.00176198	ILMN_1214829	Mus musculus olfactory receptor 910 (Olfr910), mRNA.
120	SLC17A5	R1ML0 RFL+	R2ML0 RFL+	-0.0226617	0.238053	0.339283	0.693562	0.0110322	6.54e-06	0.934772	0.0500786	7.837e-05	ILMN_1216788	Mus musculus solute carrier family 17 (anion/sugar transporter), member 5 (Slc17a5), mRNA.
121	R3HDM1	R1ML0 RFL+	R2ML0 RFL+	-0.0293308	0.119026	0.18797	0.275407	0.0002596	1.7e-05	0.778357	0.00277919	0.00017267	ILMN_2759868
122	DMRT2	R1ML0 RFL+	R2ML0 RFL+	0.0543985	0.0870175	0.179801	0.319142	0.0652944	1.242e-05	0.803084	0.180576	0.00013272	ILMN_1227296	Mus musculus doublesex and mab-3 related transcription factor 2 (Dmrt2), mRNA.
123	ZFP92	R1ML0 RFL+	R2ML0 RFL+	0.0166617	0.0569474	0.160705	0.577525	0.0182599	0.00027581	0.905252	0.0723444	0.00176659	ILMN_2508485
124	POU5F1	R1ML0 RFL+	R2ML0 RFL+	0.0285414	-0.0374825	0.193557	0.495848	0.183048	5.67e-06	0.883651	0.361468	6.947e-05	ILMN_1217100
125	WWTR1	R1ML0 RFL+	R2ML0 RFL+	-0.00093985	0.0687982	0.192464	0.975475	0.128664	1.574e-05	0.995312	0.287502	0.00016188	ILMN_2732998
126	OLFR1437	R1ML0 RFL0	R2ML+ RFL0	0.0137293	0.157158	0.121003	0.623907	2.901e-05	0.00121192	0.91935	0.00044961	0.00603542	ILMN_2844418	Mus musculus olfactory receptor 1437 (Olfr1437), mRNA.
127	OXT	R1ML0 RFL+	R2ML0 RFL+	-0.0110376	0.134272	0.16119	0.767762	0.0152575	5.454e-05	0.952989	0.0634834	0.00045488	ILMN_2669486	Mus musculus oxytocin (Oxt), mRNA.
128	CASP4	R1ML0 RFL+	R2ML0 RFL+	0.0250602	0.0582982	0.206583	0.539282	0.247319	9.6e-07	0.89562	0.437786	1.614e-05	ILMN_2811746	Mus musculus caspase 4, apoptosis-related cysteine peptidase (Casp4), mRNA.
129	OLFR503	R1ML0 RFL+	R2ML0 RFL+	0.0231429	0.0838333	0.173045	0.530796	0.0376501	9.97e-06	0.893235	0.122903	0.00011124	ILMN_2890762	Mus musculus olfactory receptor 503 (Olfr503), mRNA.
130	PLA2G4E	R1ML0 RFL+	R2ML0 RFL+	-0.0227068	0.0299123	0.18147	0.571745	0.353549	1.8e-07	0.903734	0.546912	4.05e-06	ILMN_2774916
131	SUMF2	R1ML0 RFL+	R2ML0 RFL+	0.0324662	0.0450614	0.169696	0.60724	0.290456	6.132e-05	0.914206	0.483191	0.00050307	ILMN_3115185	Mus musculus sulfatase modifying factor 2 (Sumf2), mRNA.
132	TOE1	R1ML0 RFL0	R2ML+ RFL0	0.0158647	0.162246	0.128863	0.619215	3.5e-07	1.5e-05	0.917785	9.79e-06	0.00015587	ILMN_1220416	Mus musculus target of EGR1, member 1 (nuclear) (Toe1), mRNA.
133	FTO	R1ML0 RFL+	R2ML0 RFL+	0.0342331	0.163114	0.225923	0.426182	0.046851	0.00044069	0.857575	0.143257	0.00262384	ILMN_2763674	Mus musculus fat mass and obesity associated (Fto), mRNA.
134	OLFR638	R1ML0 RFL+	R2ML0 RFL+	-0.0295489	0.0257368	0.155381	0.324775	0.285944	5.97e-06	0.807288	0.478604	7.261e-05	ILMN_2633907
135	OTTMUSG00000020946	R1ML0 RFL+	R2ML0 RFL+	-0.0193308	0.066693	0.186643	0.402988	0.138593	8.2e-07	0.846966	0.301687	1.41e-05	ILMN_2895546	Mus musculus predicted gene, OTTMUSG00000020946 (OTTMUSG00000020946), mRNA.
136	OTTMUSG00000005523	R1ML0 RFL+	R2ML0 RFL+	0.00475188	0.0603947	0.171988	0.868042	0.236821	8.18e-06	0.974843	0.425595	9.468e-05	ILMN_2847773	Mus musculus predicted gene, OTTMUSG00000005523 (OTTMUSG00000005523), mRNA.
137	1810030N24RIK	R1ML0 RFL+	R2ML0 RFL+	0.086188	0.143807	0.165973	0.00697709	0.0363305	0.00203658	0.331698	0.119906	0.00928236	ILMN_1246756
138	PEX11B	R1ML0 RFL+	R2ML0 RFL+	-0.0389098	0.0929474	0.294265	0.44675	0.0770248	8.2e-06	0.864442	0.202985	9.478e-05	ILMN_1258372	Mus musculus peroxisomal biogenesis factor 11b (Pex11b), mRNA.
139	WDR34	R1ML0 RFL+	R2ML0 RFL+	-0.0022782	-0.0102544	0.178699	0.961052	0.81829	0.00132337	0.992452	0.902743	0.00647992	ILMN_1233784
140	PDE4DIP	R1ML0 RFL+	R2ML0 RFL+	-0.0422932	0.0267544	0.158048	0.160189	0.51612	0.00012842	0.696391	0.689367	0.0009402	ILMN_1218906
141	ASB9	R1ML0 RFL+	R2ML0 RFL+	0.0150301	0.0723158	0.155682	0.674463	0.0423273	3.955e-05	0.931299	0.133442	0.00034782	ILMN_2682835	Mus musculus ankyrin repeat and SOCS box-containing protein 9 (Asb9), mRNA.
142	BC060267	R1ML0 RFL+	R2ML0 RFL+	0.00727068	0.0103421	0.167586	0.778317	0.704014	8.7e-07	0.955462	0.829675	1.475e-05	ILMN_1254983	Mus musculus cDNA sequence BC060267 (BC060267), mRNA.
143	OLFR748	R1ML0 RFL+	R2ML0 RFL+	0.055	0.098	0.244923	0.170175	0.0421103	2.159e-05	0.702721	0.132856	0.00021109	ILMN_3160239	Mus musculus olfactory receptor 748 (Olfr748), mRNA.
144	BCHE	R1ML0 RFL+	R2ML0 RFL+	0.0290526	-0.00294737	0.151021	0.412891	0.944137	7.727e-05	0.850437	0.971275	0.00061226	ILMN_1235621
145	6230409E13RIK	R1ML0 RFL+	R2ML0 RFL+	-0.0324737	0.0810263	0.156345	0.249165	0.0135432	6.9e-06	0.763056	0.0580127	8.211e-05	ILMN_1228753
146	PCDHGA10	R1ML0 RFL+	R2ML0 RFL+	0.0490602	0.117132	0.153048	0.102411	8.973e-05	2.553e-05	0.641653	0.00115404	0.00024188	ILMN_1228667	Mus musculus protocadherin gamma subfamily A, 10 (Pcdhga10), mRNA.
147	HTR2A	R1ML0 RFL+	R2ML0 RFL+	-0.0312481	0.0457281	0.158649	0.129763	0.264255	1.134e-05	0.672283	0.456661	0.00012315	ILMN_2725529	Mus musculus 5-hydroxytryptamine (serotonin) receptor 2A (Htr2a), mRNA.
148	CTSR	R1ML0 RFL0	R2ML+ RFL0	-0.0226617	0.183386	0.103455	0.539645	0.0069197	0.0115264	0.895789	0.0357778	0.0384417	ILMN_2712480	Mus musculus cathepsin R (Ctsr), mRNA.
149	MADD	R1ML0 RFL+	R2ML0 RFL+	0.0443158	0.0943158	0.153289	0.166529	0.00597865	7.8e-05	0.700706	0.0321833	0.00061577	ILMN_2658931
150	ZFP385A	R1ML0 RFL+	R2ML+ RFL+	0.0339173	0.301298	0.266562	0.68759	0.0109055	0.00091383	0.933251	0.0496787	0.00477968	ILMN_1231720
151	MYCBP2	R1ML0 RFL+	R2ML0 RFL+	0.0530075	0.139912	0.15706	0.120781	6.052e-05	0.00015486	0.661349	0.00082462	0.00109685	ILMN_1240830
152	OLFR1384	R1ML0 RFL+	R2ML0 RFL+	0.0105414	0.0948509	0.155	0.694123	0.00223769	9.001e-05	0.934772	0.0153704	0.00069479	ILMN_2670532	Mus musculus olfactory receptor 1384 (Olfr1384), mRNA.
153	GALC	R1ML0 RFL0	R2ML+ RFL0	0.0875263	0.25736	0.134134	0.0308954	0.00602126	0.00040762	0.487231	0.0323404	0.00245478	ILMN_1247261
154	PPP1R1B	R1ML0 RFL+	R2ML+ RFL+	0.245	0.478833	0.284536	0.035515	0.00416421	0.00081985	0.503103	0.0245881	0.00435222	ILMN_2954824	Mus musculus protein phosphatase 1, regulatory (inhibitor) subunit 1B (Ppp1r1b), mRNA.
155	6330406I15RIK	R1ML0 RFL0	R2ML+ RFL0	-0.00992481	0.173123	0.129452	0.649849	0.00049411	0.00071912	0.926521	0.00468014	0.00390927	ILMN_1213736	Mus musculus RIKEN cDNA 6330406I15 gene (6330406I15Rik), mRNA.
156	ACTA2	R1ML0 RFL+	R2ML+ RFL+	-0.0656917	0.188404	0.154521	0.123388	0.00826277	0.00061629	0.664276	0.0406137	0.00345558	ILMN_2710354
157	LEP	R1ML0 RFL+	R2ML+ RFL+	0.00389474	0.157061	0.239619	0.907682	0.0039797	8.4e-07	0.98318	0.0237663	1.434e-05	ILMN_2695964	Mus musculus leptin (Lep), mRNA.
158	MB	R1ML0 RFL+	R2ML0 RFL+	0.0501053	0.110105	0.174759	0.092473	0.00552643	8.511e-05	0.62788	0.0304161	0.00066352	ILMN_2954987	Mus musculus myoglobin (Mb), mRNA.
159	BPNT1	R1ML0 RFL+	R2ML0 RFL+	0.0488496	0.0532544	0.169271	0.179142	0.274807	1.22e-06	0.709492	0.467322	1.96e-05	ILMN_3070466
160	ORC2L	R1ML0 RFL+	R2ML0 RFL+	0.000466165	0.0492281	0.163137	0.993872	0.0891672	5.1e-07	0.999141	0.224376	9.53e-06	ILMN_1220661	Mus musculus origin recognition complex, subunit 2-like (S. cerevisiae) (Orc2l), transcript variant a, mRNA.
161	CTRL	R1ML0 RFL+	R2ML0 RFL+	0.0168421	0.0460088	0.152065	0.677619	0.400457	1.016e-05	0.93224	0.590766	0.00011292	ILMN_2673260
162	KLHL18	R1ML0 RFL+	R2ML0 RFL+	0.0360226	0.0469035	0.153854	0.322087	0.334039	4.5e-07	0.805399	0.527422	8.55e-06	ILMN_1235016
163	MRPS14	R1ML0 RFL+	R2ML0 RFL+	0.045594	0.11257	0.152607	0.116542	0.00457754	4.489e-05	0.658373	0.0264811	0.00038682	ILMN_1256760
164	BBC3	R1ML0 RFL0	R2ML+ RFL0	0.00100752	0.186079	0.135545	0.981783	0.00031222	0.00126932	0.996676	0.00322441	0.00627144	ILMN_2690620	Mus musculus Bcl-2 binding component 3 (Bbc3), mRNA.
165	DUS1L	R1ML0 RFL+	R2ML0 RFL+	-0.141361	0.158711	0.299423	0.192253	0.0989527	0.00355309	0.719117	0.241137	0.0147264	ILMN_1246694	Mus musculus dihydrouridine synthase 1-like (S. cerevisiae) (Dus1l), mRNA.
166	MFN1	R1ML0 RFL+	R2ML0 RFL+	-0.0275789	0.0172544	0.227497	0.608309	0.783639	0.00885454	0.914616	0.881386	0.0311223	ILMN_2719296	Mus musculus mitofusin 1 (Mfn1), mRNA.
167	MFN1	R1ML0 RFL+	R2ML0 RFL+	-0.0758647	0.0650877	0.209595	0.158737	0.355966	0.0109952	0.695903	0.549391	0.0370842	ILMN_2950837	Mus musculus mitofusin 1 (Mfn1), mRNA.
168	GIGYF1	R1ML0 RFL+	R2ML0 RFL+	0.0269248	0.0722105	0.16183	0.441533	0.0810539	8.38e-06	0.862568	0.210112	9.658e-05	ILMN_2600453
169	OLFR1113	R1ML0 RFL+	R2ML0 RFL+	0.0184361	0.102246	0.172298	0.642118	0.100707	1.5e-07	0.924606	0.243908	3.49e-06	ILMN_2892716	Mus musculus olfactory receptor 1113 (Olfr1113), mRNA.
170	NOVA2	R1ML0 RFL+	R2ML0 RFL+	0.0194286	-0.00883333	0.151021	0.602353	0.850368	0.00013042	0.912012	0.920331	0.00095294	ILMN_3044523	Mus musculus neuro-oncological ventral antigen 2 (Nova2), mRNA.
171	6530406M24RIK	R1ML0 RFL+	R2ML0 RFL+	-0.00150376	0.00737719	0.202199	0.97245	0.819017	4.332e-05	0.994419	0.903042	0.00037571	ILMN_2688622
172	HOXA4	R1ML0 RFL+	R2ML0 RFL+	-0.0077218	0.0540877	0.190134	0.84073	0.0794265	2.702e-05	0.968028	0.207	0.00025334	ILMN_2755860	Mus musculus homeo box A4 (Hoxa4), mRNA.
173	GPR45	R1ML0 RFL0	R2ML+ RFL0	0.0180376	0.186895	0.119604	0.614808	0.00869519	0.00649987	0.916621	0.0421192	0.024249	ILMN_1228145	Mus musculus G protein-coupled receptor 45 (Gpr45), mRNA.
174	TMEM88	R1ML0 RFL+	R2ML0 RFL+	-0.0171353	0.109912	0.17639	0.65307	0.0466245	1.564e-05	0.926748	0.142768	0.00016127	ILMN_2822321	Mus musculus transmembrane protein 88 (Tmem88), mRNA.
175	OLFR257	R1ML0 RFL+	R2ML0 RFL+	0.00862406	0.0285526	0.167914	0.824864	0.338108	2.076e-05	0.964783	0.531527	0.00020426	ILMN_2795377	Mus musculus olfactory receptor 257 (Olfr257), mRNA.
176	AFF4	R1ML0 RFL+	R2ML0 RFL+	0.061	0.147833	0.228384	0.500771	0.0235131	0.00039512	0.886476	0.0869125	0.00239296	ILMN_1251170	Mus musculus AF4/FMR2 family, member 4 (Aff4), mRNA.
177	IFNA1	R1ML0 RFL+	R2ML0 RFL+	0.092797	0.0742018	0.154232	0.0294102	0.123824	8.872e-05	0.47965	0.280012	0.00068713	ILMN_2858639	Mus musculus interferon alpha 1 (Ifna1), mRNA.
178	ACTL6B	R1ML0 RFL+	R2ML0 RFL+	0.0766241	0.130053	0.155881	0.0984567	1.768e-05	0.00013783	0.638255	0.00029686	0.00099684	ILMN_1237413	Mus musculus actin-like 6B (Actl6b), mRNA.
179	MEF2B	R1ML0 RFL+	R2ML0 RFL+	0.0435113	0.0667018	0.158274	0.247737	0.113028	0.00058974	0.761966	0.263374	0.00332702	ILMN_3111575	Mus musculus myocyte enhancer factor 2B (Mef2b), transcript variant 2, mRNA.
180	CTCFL	R1ML0 RFL+	R2ML0 RFL+	0.0896767	0.130772	0.197622	0.0273729	0.0450497	0.0103604	0.467587	0.139357	0.0353465	ILMN_2855551	Mus musculus CCCTC-binding factor (zinc finger protein)-like (Ctcfl), mRNA.
181	GIPC1	R1ML0 RFL+	R2ML0 RFL+	0.14212	0.22543	0.31044	0.00434066	0.013927	4.346e-05	0.290299	0.0592542	0.00037676	ILMN_2942573	Mus musculus GIPC PDZ domain containing family, member 1 (Gipc1), mRNA.
182	TAPBP	R1ML0 RFL+	R2ML0 RFL+	0.208962	0.369439	0.311211	0.0207549	0.0182302	0.00032426	0.436128	0.0722601	0.00202777	ILMN_3155492	Mus musculus TAP binding protein (Tapbp), transcript variant 1, mRNA.
183	SIP1	R1ML0 RFL0	R2ML+ RFL0	0.207647	0.256623	0.173446	0.00016815	0.00495151	0.022603	0.0864193	0.0280262	0.0654235	ILMN_2920800	Mus musculus survivor of motor neuron protein interacting protein 1 (Sip1), mRNA.
184	OLFR1500	R1ML0 RFL+	R2ML0 RFL+	0.00675188	0.0407281	0.179836	0.794072	0.319245	1.019e-05	0.959568	0.512792	0.00011304	ILMN_3161537	Mus musculus olfactory receptor 1500 (Olfr1500), mRNA.
185	VSNL1	R1ML0 RFL+	R2ML0 RFL+	0.0633684	0.0270351	0.169304	0.150872	0.378178	3.649e-05	0.688161	0.570307	0.00032588	ILMN_2438724
186	SCNM1	R1ML0 RFL+	R2ML0 RFL+	0.033985	0.110509	0.153304	0.387669	0.00359657	7.89e-05	0.840408	0.0219163	0.00062181	ILMN_2787580	Mus musculus sodium channel modifier 1 (Scnm1), mRNA.
187	WSCD2	R1ML0 RFL+	R2ML0 RFL+	0.0353759	0.120781	0.177655	0.46847	0.00845089	0.00012574	0.873104	0.0413328	0.00092368	ILMN_2667055
188	FRG1	R1ML0 RFL+	R2ML0 RFL+	0.0466241	0.0245526	0.162241	0.31306	0.552252	4.2e-07	0.80023	0.718432	8.1e-06	ILMN_1240867	Mus musculus FSHD region gene 1 (Frg1), mRNA.
189	2310016C08RIK	R1ML0 RFL+	R2ML0 RFL+	0.0512105	0.272544	0.27461	0.213601	0.0131171	5.8e-07	0.734013	0.0568179	1.053e-05	ILMN_1239221	Mus musculus RIKEN cDNA 2310016C08 gene (2310016C08Rik), mRNA.
190	MAD2L1BP	R1ML0 RFL+	R2ML+ RFL+	-0.075812	0.205807	0.179988	0.0315804	0.00633472	6.254e-05	0.48787	0.0335221	0.00051182	ILMN_2669087	Mus musculus MAD2L1 binding protein (Mad2l1bp), mRNA.
191	REEP4	R1ML0 RFL+	R2ML+ RFL+	-0.0405489	0.242404	0.38878	0.554361	0.00917485	1e-08	0.899513	0.043888	5e-07	ILMN_2739250	Mus musculus receptor accessory protein 4 (Reep4), mRNA.
192	SLC45A4	R1ML0 RFL+	R2ML+ RFL+	-0.0232932	0.205588	0.159485	0.423536	0.00715379	0.00303426	0.856398	0.0366197	0.0129348	ILMN_2886162	Mus musculus solute carrier family 45, member 4 (Slc45a4), mRNA. XM_898255 XM_898268 XM_907823 XM_920555 XM_920562 XM_920569 XM_920578 XM_920594
193	TOMM34	R1ML0 RFL+	R2ML0 RFL+	-0.0994737	0.18736	0.306875	0.0953153	0.0292245	4.5e-06	0.633982	0.102147	5.763e-05	ILMN_2790144	Mus musculus translocase of outer mitochondrial membrane 34 (Tomm34), mRNA.
194	2310047M10RIK	R1ML0 RFL+	R2ML+ RFL+	0.10988	0.36257	0.412185	0.257619	0.00045823	0.00039462	0.767374	0.00440853	0.0023905	ILMN_2946608	Mus musculus RIKEN cDNA 2310047M10 gene (2310047M10Rik), mRNA.
195	ACTR1A	R1ML0 RFL+	R2ML+ RFL+	-0.0461203	0.295404	0.428143	0.445559	0.00344435	3.557e-05	0.864128	0.0212202	0.00031904	ILMN_2728697	Mus musculus ARP1 actin-related protein 1 homolog A (yeast) (Actr1a), mRNA.
196	CDIPT	R1ML0 RFL+	R2ML0 RFL+	-0.0358195	0.177895	0.275024	0.513946	0.0239928	0.00057149	0.890792	0.0882289	0.00324322	ILMN_1224421	Mus musculus CDP-diacylglycerol--inositol 3-phosphatidyltransferase (phosphatidylinositol synthase) (Cdipt), mRNA.
197	JAGN1	R1ML0 RFL+	R2ML+ RFL+	-0.130632	0.263202	0.36936	0.0849944	0.00084322	4.722e-05	0.615625	0.00719268	0.00040341	ILMN_1221859	Mus musculus jagunal homolog 1 (Drosophila) (Jagn1), mRNA.
198	DUSP11	R1ML0 RFL+	R2ML+ RFL+	-0.0396617	0.302053	0.301027	0.5848	6.02e-05	2.073e-05	0.907729	0.00082245	0.00020407	ILMN_2711705	Mus musculus dual specificity phosphatase 11 (RNA/RNP complex 1-interacting) (Dusp11), mRNA.
199	HDGFRP2	R1ML0 RFL+	R2ML0 RFL+	-0.0523233	0.115272	0.303702	0.38854	0.0177027	9.794e-05	0.841265	0.070767	0.0007466	ILMN_2617112	Mus musculus hepatoma-derived growth factor, related protein 2 (Hdgfrp2), mRNA.
200	NOC4L	R1ML0 RFL+	R2ML+ RFL+	0.0504812	0.233053	0.220244	0.225186	7.2e-07	0.00024096	0.74365	1.842e-05	0.00157957	ILMN_2957862	Mus musculus nucleolar complex associated 4 homolog (S. cerevisiae) (Noc4l), mRNA.
201	PRMT7	R1ML0 RFL+	R2ML0 RFL+	-0.019188	0.140193	0.377226	0.738008	0.0655744	8.9e-07	0.946055	0.181112	1.509e-05	ILMN_2736347	Mus musculus protein arginine N-methyltransferase 7 (Prmt7), mRNA.
202	SPSB3	R1ML0 RFL0	R2ML+ RFL0	0.0321579	0.236491	0.152979	0.630108	0.00032689	0.106597	0.921217	0.00335204	0.211801	ILMN_2994108	Mus musculus splA/ryanodine receptor domain and SOCS box containing 3 (Spsb3), mRNA.
203	CLDN15	R1ML0 RFL0	R2ML+ RFL0	0.0331504	0.174412	0.148232	0.397056	0.00012294	0.0187826	0.845152	0.00151308	0.0566154	ILMN_2793817	Mus musculus claudin 15 (Cldn15), mRNA.
204	4930504E06RIK	R1ML0 RFL0	R2ML+ RFL0	0.0886842	0.205351	0.186301	0.217636	0.00748995	0.0335803	0.737662	0.0378754	0.0887498	ILMN_1237664	Mus musculus RIKEN cDNA 4930504E06 gene (4930504E06Rik), mRNA.
205	ATP6V0B	R1ML0 RFL+	R2ML+ RFL+	-0.143835	0.299737	0.27556	0.057074	0.00460344	0.00484419	0.56583	0.0265771	0.0190222	ILMN_1243149	Mus musculus ATPase, H+ transporting, lysosomal V0 subunit B (Atp6v0b), mRNA.
206	FRRS1	R1ML0 RFL+	R2ML+ RFL+	-0.0279624	0.354895	0.233381	0.596162	0.00020043	0.00459313	0.909767	0.00224422	0.0182088	ILMN_3098120	Mus musculus ferric-chelate reductase 1 (Frrs1), mRNA.
207	LAMP1	R1ML0 RFL+	R2ML0 RFL+	-0.0646316	0.223868	0.306318	0.329412	0.0365772	0.00050465	0.810058	0.120472	0.00293329	ILMN_1237208
208	LOC666676	R1ML0 RFL+	R2ML0 RFL+	-0.154865	0.140921	0.171006	0.0112904	0.0239745	0.00715497	0.370072	0.0881866	0.0262284	ILMN_3160792	Mus musculus ADP-ribosylation factor 1 (Arf1), mRNA.
209	ELOVL1	R1ML0 RFL+	R2ML+ RFL+	0.0724436	0.408325	0.475286	0.602074	1.94e-06	3.764e-05	0.911858	4.378e-05	0.00033448	ILMN_3143506	Mus musculus elongation of very long chain fatty acids (FEN1/Elo2, SUR4/Elo3, yeast)-like 1 (Elovl1), transcript variant 2, mRNA.
210	IL15	R1ML0 RFL+	R2ML0 RFL+	0.0110226	0.148237	0.166473	0.666327	0.0146641	3.822e-05	0.929977	0.0615927	0.00033884	ILMN_1219869
211	BCL6B	R1ML0 RFL+	R2ML0 RFL+	0.00741353	0.121842	0.161595	0.85132	0.0721415	4.869e-05	0.970726	0.193712	0.00041389	ILMN_2629764	Mus musculus B-cell CLL/lymphoma 6, member B (Bcl6b), mRNA.
212	DLK2	R1ML0 RFL+	R2ML0 RFL+	0.0204286	0.133667	0.150027	0.482261	5.722e-05	4.277e-05	0.878351	0.00078929	0.00037171	ILMN_2699621
213	OLFM2	R1ML0 RFL+	R2ML0 RFL+	0.031609	0.125728	0.17361	0.373877	4e-08	1.691e-05	0.834505	1.38e-06	0.00017212	ILMN_2905573	Mus musculus olfactomedin 2 (Olfm2), mRNA.
214	AA792892	R1ML0 RFL+	R2ML0 RFL+	-0.115008	0.0187544	0.176003	0.0447761	0.803653	1.903e-05	0.534544	0.893907	0.00018966	ILMN_2984591	Mus musculus expressed sequence AA792892 (AA792892), mRNA.
215	APOA2	R1ML0 RFL+	R2ML0 RFL+	-0.093812	-0.030693	0.152747	0.0718883	0.348534	0.00162286	0.592534	0.542049	0.00768638	ILMN_1247156	Mus musculus apolipoprotein A-II (Apoa2), mRNA.
216	APLP2	R1ML0 RFL+	R2ML+ RFL+	-0.0395338	0.224895	0.23919	0.635492	0.00841733	0.00303977	0.923233	0.0412079	0.0129515	ILMN_1216689
217	CMTM4	R1ML0 RFL+	R2ML0 RFL+	-0.261218	0.125711	0.222815	0.00539584	0.129699	0.00472311	0.305797	0.288936	0.0186407	ILMN_1244409
218	TXNL4A	R1ML0 RFL+	R2ML0 RFL+	-0.234564	0.199912	0.245568	0.00886159	0.0233602	0.00115524	0.351996	0.0864594	0.00579018	ILMN_3114365	Mus musculus thioredoxin-like 4 (Txnl4), transcript variant 2, mRNA.
219	GSS	R1ML0 RFL+	R2ML0 RFL+	-0.196008	0.0194211	0.226899	0.0264191	0.78764	0.00293165	0.467587	0.883754	0.012562	ILMN_1227649	Mus musculus glutathione synthetase (Gss), mRNA.
220	CDC2L1	R1ML0 RFL+	R2ML0 RFL+	-0.0666165	0.036693	0.205869	0.368495	0.444356	5.758e-05	0.830482	0.629992	0.00047749	ILMN_2641705	Mus musculus cell division cycle 2-like 1 (Cdc2l1), mRNA.
221	PSMD13	R1ML0 RFL+	R2ML0 RFL+	-0.161541	0.00981579	0.251295	0.00073879	0.818201	0.00078879	0.152863	0.902698	0.00421665	ILMN_2686644	Mus musculus proteasome (prosome, macropain) 26S subunit, non-ATPase, 13 (Psmd13), mRNA.
222	TSTA3	R1ML0 RFL+	R2ML0 RFL+	-0.0876842	0.160149	0.153411	0.0273277	0.0382916	0.0096444	0.467587	0.124444	0.0333601	ILMN_1221145	Mus musculus tissue specific transplantation antigen P35B (Tsta3), mRNA.
223	TSPO	R1ML0 RFL+	R2ML0 RFL+	-0.00571429	-0.007	0.31825	0.945821	0.937865	0.00075059	0.988887	0.967651	0.0040521	ILMN_2727920	Mus musculus translocator protein (Tspo), mRNA.
224	TSPO	R1ML0 RFL+	R2ML0 RFL+	-0.0796767	-0.0339386	0.283536	0.114589	0.672385	0.00137125	0.656921	0.807585	0.00667702	ILMN_2727921	Mus musculus translocator protein (Tspo), mRNA.
225	DCTN3	R1ML0 RFL+	R2ML0 RFL+	-0.182782	0.00478947	0.231384	0.00458928	0.934515	0.00013012	0.292632	0.965703	0.00095153	ILMN_2805029	Mus musculus dynactin 3 (Dctn3), mRNA.
226	RABAC1	R1ML0 RFL+	R2ML0 RFL+	-0.241571	-0.160833	0.195211	0.00324323	0.0497115	0.0043059	0.270026	0.149111	0.0172544	ILMN_2710112
227	5830434P21RIK	R1ML0 RFL0	R2ML+ RFL0	-0.0291053	0.185395	0.0796488	0.437811	0.00158899	0.0787425	0.860009	0.0118906	0.169185	ILMN_1240274	Mus musculus RIKEN cDNA 5830434P21 gene (5830434P21Rik), mRNA.
228	HNRNPA2B1	R1ML0 RFL+	R2ML0 RFL+	-0.230526	0.193974	0.302214	0.0764108	0.0742735	3.338e-05	0.601295	0.197742	0.00030303	ILMN_2615855
229	TUG1	R1ML0 RFL0	R2ML+ RFL0	-0.0428571	0.2805	0.145357	0.470471	3.2e-07	0.00017317	0.873605	8.96e-06	0.0012012	ILMN_3098616	Mus musculus taurine upregulated gene 1 (Tug1) on chromosome 11.
230	RNF114	R1ML0 RFL+	R2ML0 RFL+	-0.0704436	0.131342	0.187839	0.248241	0.0676797	0.00521081	0.761966	0.185412	0.020169	ILMN_1238612
231	LANCL1	R1ML0 RFL+	R2ML0 RFL+	-0.166398	0.0558158	0.168658	0.00504661	0.396137	0.0104785	0.298808	0.586885	0.035669	ILMN_1226187	Mus musculus LanC (bacterial lantibiotic synthetase component C)-like 1 (Lancl1), mRNA.
232	LANCL1	R1ML0 RFL+	R2ML0 RFL+	-0.0487669	0.0217807	0.166125	0.401271	0.759821	0.0065612	0.846637	0.866128	0.024423	ILMN_2731792	Mus musculus LanC (bacterial lantibiotic synthetase component C)-like 1 (Lancl1), mRNA.
233	0610006I08RIK	R1ML0 RFL+	R2ML0 RFL+	-0.136639	0.0109561	0.25228	0.115594	0.919975	0.00013904	0.656921	0.958439	0.00100418	ILMN_2896528	Mus musculus RIKEN cDNA 0610006I08 gene (0610006I08Rik), mRNA.
234	0610006I08RIK	R1ML0 RFL+	R2ML0 RFL+	-0.0772857	0.0326667	0.504443	0.402095	0.790663	2.96e-06	0.846905	0.885894	4.025e-05	ILMN_2721178	Mus musculus RIKEN cDNA 0610006I08 gene (0610006I08Rik), mRNA.
235	APOC2	R1ML0 RFL+	R2ML0 RFL+	-0.180075	-0.0337895	0.381232	0.106745	0.68121	5.505e-05	0.648425	0.814113	0.0004587	ILMN_2647820	Mus musculus apolipoprotein C-II (Apoc2), mRNA.
236	BC017612	R1ML0 RFL+	R2ML+ RFL+	-0.0683459	0.265868	0.359869	0.323821	0.00366866	3.147e-05	0.807118	0.0222554	0.00028914	ILMN_2631514
237	G3BP2	R1ML0 RFL+	R2ML0 RFL+	-0.195195	0.0512807	0.451914	0.0127592	0.423927	1.597e-05	0.383479	0.611891	0.00016396	ILMN_2691815
238	BC017647	R1ML0 RFL+	R2ML0 RFL+	-0.0580977	0.119807	0.27419	0.353476	0.0205714	0.00099223	0.821888	0.0787815	0.00511787	ILMN_1233664
239	FRAG1	R1ML0 RFL+	R2ML0 RFL+	-0.088406	0.104904	0.474018	0.0371135	0.160215	2.8e-07	0.508415	0.332153	5.76e-06	ILMN_2751492
240	PLEKHA5	R1ML0 RFL+	R2ML0 RFL+	-0.0671955	0.0822807	0.25092	0.248341	0.0504614	6.46e-06	0.761966	0.150692	7.751e-05	ILMN_2914453	Mus musculus pleckstrin homology domain containing, family A member 5 (Plekha5), mRNA.
241	CEACAM1	R1ML0 RFL+	R2ML0 RFL+	-0.0707744	0.0773684	0.284741	0.527743	0.481995	0.00299307	0.892371	0.662093	0.0127741	ILMN_2683560
242	CEACAM1	R1ML0 RFL+	R2ML0 RFL+	-0.103474	0.15536	0.263988	0.421789	0.147467	0.0137517	0.855328	0.314635	0.0440618	ILMN_3126609	Mus musculus CEA-related cell adhesion molecule 1 (Ceacam1), transcript variant 4, mRNA.
243	FPGS	R1ML0 RFL+	R2ML0 RFL+	0.0568571	0.1895	0.570574	0.597186	0.114845	4.292e-05	0.910304	0.266057	0.00037258	ILMN_2747070	Mus musculus folylpolyglutamyl synthetase (Fpgs), mRNA.
244	FPGS	R1ML0 RFL+	R2ML0 RFL+	0.195098	0.13586	0.507363	0.073281	0.152185	2.95e-06	0.594073	0.321102	4.021e-05	ILMN_1233334	Mus musculus folylpolyglutamyl synthetase (Fpgs), mRNA.
245	FPGS	R1ML0 RFL+	R2ML0 RFL+	0.0957368	0.145737	0.267607	0.290978	0.084861	0.00148688	0.787522	0.216961	0.0071444	ILMN_2870443	Mus musculus folylpolyglutamyl synthetase (Fpgs), mRNA.
246	2010100O12RIK	R1ML0 RFL+	R2ML0 RFL+	0.0298947	0.00472807	0.240214	0.561608	0.910215	7.9e-06	0.901686	0.952988	9.206e-05	ILMN_1228094	Mus musculus RIKEN cDNA 2010100O12 gene (2010100O12Rik), mRNA.
247	EPHA2	R1ML0 RFL+	R2ML0 RFL+	-0.0355113	0.0944649	0.244685	0.7218	0.415633	0.00081988	0.942644	0.604793	0.00435222	ILMN_2688653	Mus musculus Eph receptor A2 (Epha2), mRNA.
248	C730027P07RIK	R1ML0 RFL+	R2ML0 RFL+	0.120835	0.0677632	0.211009	0.0352893	0.274269	0.00036808	0.502277	0.466887	0.00225906	ILMN_2681690	Mus musculus RIKEN cDNA C730027P07 gene (C730027P07Rik), mRNA.
249	PCBD1	R1ML0 RFL+	R2ML0 RFL+	0.323609	-0.0121053	0.370452	0.00147229	0.870147	0.00947662	0.202318	0.931114	0.0329171	ILMN_2690575	Mus musculus pterin 4 alpha carbinolamine dehydratase/dimerization cofactor of hepatocyte nuclear factor 1 alpha (TCF1) 1 (Pcbd1), mRNA.
250	SEPX1	R1ML0 RFL+	R2ML0 RFL+	0.0468346	-0.0622368	0.315491	0.43928	0.583372	0.00754104	0.861302	0.742419	0.0273549	ILMN_2755534
251	SHMT2	R1ML0 RFL+	R2ML0 RFL+	0.177	-0.0436667	0.292613	0.0999196	0.672569	0.0105101	0.640612	0.807769	0.0357625	ILMN_1224942
252	SLC12A7	R1ML0 RFL+	R2ML0 RFL+	0.171564	0.0487544	0.248518	0.037497	0.481689	0.00051793	0.511088	0.661852	0.00299119	ILMN_2650953
253	CPOX	R1ML0 RFL+	R2ML0 RFL+	0.00660902	0.0347281	0.21328	0.935161	0.587408	0.0013901	0.987054	0.745524	0.00675901	ILMN_2972755	Mus musculus coproporphyrinogen oxidase (Cpox), mRNA.
254	HCFC1R1	R1ML0 RFL+	R2ML0 RFL+	0.0210226	-0.0124298	0.198533	0.427944	0.76679	4.829e-05	0.857691	0.870366	0.00041118	ILMN_2723083	Mus musculus host cell factor C1 regulator 1 (XPO1-dependent) (Hcfc1r1), mRNA.
255	0610007C21RIK	R1ML0 RFL+	R2ML0 RFL+	-0.0383835	0.0971404	0.567167	0.690171	0.137948	3.557e-05	0.933932	0.300818	0.00031904	ILMN_3033922	Mus musculus RIKEN cDNA 0610007C21 gene (0610007C21Rik), transcript variant 1, mRNA.
256	SRA1	R1ML0 RFL+	R2ML+ RFL+	0.0599474	0.186281	0.545625	0.345208	0.00321486	1.39e-06	0.817662	0.0200677	2.166e-05	ILMN_2659132	Mus musculus steroid receptor RNA activator 1 (Sra1), mRNA.
257	POLR1D	R1ML0 RFL+	R2ML+ RFL+	-0.0526917	0.30257	0.504414	0.58012	5.244e-05	1.2e-07	0.906576	0.00073591	3.02e-06	ILMN_2680066	Mus musculus RNA polymerase 1-3 (Rpo1-3), transcript variant 1, mRNA.
258	0910001L09RIK	R1ML0 RFL+	R2ML0 RFL+	-0.0331805	0.0894386	0.505101	0.540156	0.0814041	3e-08	0.89588	0.210787	9.7e-07	ILMN_2621882
259	FKBP2	R1ML0 RFL+	R2ML+ RFL+	-0.0354962	0.193289	0.484976	0.504971	0.00315397	1.6e-07	0.886927	0.0198015	3.81e-06	ILMN_1220875	Mus musculus FK506 binding protein 2 (Fkbp2), mRNA.
260	2500002L14RIK	R1ML0 RFL+	R2ML+ RFL+	-0.0213684	0.497132	0.686503	0.832771	6.81e-05	0	0.965994	0.00091236	1.1e-07	ILMN_2606015
261	SNRPD2	R1ML0 RFL+	R2ML0 RFL+	-0.0400075	0.244921	0.430438	0.360428	0.0185648	2.9e-07	0.825557	0.0731574	5.99e-06	ILMN_2612635
262	APIP	R1ML0 RFL+	R2ML+ RFL+	-0.131481	0.246947	0.453128	0.109061	0.00055737	5.17e-06	0.649588	0.0051447	6.444e-05	ILMN_1244908	Mus musculus APAF1 interacting protein (Apip), mRNA.
263	TMEM150	R1ML0 RFL+	R2ML+ RFL+	0.0783233	0.508561	0.673054	0.595971	0.00026626	2e-08	0.909746	0.00283596	6.9e-07	ILMN_2653395	Mus musculus transmembrane protein 150 (Tmem150), mRNA.
264	PACSIN3	R1ML0 RFL+	R2ML+ RFL+	-0.074406	0.18907	0.397821	0.0782358	0.00021044	1e-08	0.606463	0.00233194	2.4e-07	ILMN_2628066	Mus musculus protein kinase C and casein kinase substrate in neurons 3 (Pacsin3), mRNA.
265	PFDN2	R1ML0 RFL+	R2ML0 RFL+	-0.0458797	0.181596	0.596503	0.508404	0.0352893	1e-08	0.888461	0.117359	2.2e-07	ILMN_1219667
266	POLE3	R1ML0 RFL+	R2ML0 RFL+	-0.0289699	0.181982	0.548601	0.661706	0.0302104	0	0.929172	0.104667	0	ILMN_1247613
267	PROC	R1ML0 RFL+	R2ML0 RFL+	-0.0743985	0.164316	0.685158	0.237698	0.164897	5.8e-07	0.75442	0.338237	1.056e-05	ILMN_3109675	Mus musculus protein C (Proc), transcript variant 2, mRNA.
268	AKR7A5	R1ML0 RFL+	R2ML0 RFL+	-0.0795789	0.200588	0.511378	0.361975	0.0328576	7.937e-05	0.826743	0.111347	0.00062489	ILMN_1256518	Mus musculus aldo-keto reductase family 7, member A5 (aflatoxin aldehyde reductase) (Akr7a5), mRNA.
269	FAAH	R1ML0 RFL+	R2ML0 RFL+	0.0086391	0.111711	0.528461	0.901939	0.0545574	9.772e-05	0.981868	0.158989	0.00074539	ILMN_2766930	Mus musculus fatty acid amide hydrolase (Faah), mRNA.
270	ATOX1	R1ML0 RFL+	R2ML0 RFL+	-0.148383	0.185807	0.659747	0.223997	0.0251666	8e-08	0.742405	0.0913557	2.04e-06	ILMN_1232762	Mus musculus ATX1 (antioxidant protein 1) homolog 1 (yeast) (Atox1), mRNA.
271	TMEM147	R1ML0 RFL+	R2ML+ RFL+	-0.0434962	0.168123	0.454384	0.495021	0.00063731	2.23e-06	0.883188	0.00573625	3.221e-05	ILMN_2775751
272	CRELD1	R1ML0 RFL+	R2ML0 RFL+	-0.0620526	0.362781	0.552976	0.716403	0.0451573	2.231e-05	0.94136	0.139606	0.00021656	ILMN_1232170	Mus musculus cysteine-rich with EGF-like domains 1 (Creld1), mRNA.
273	ECHDC2	R1ML0 RFL+	R2ML0 RFL+	-0.0937895	0.231877	0.503634	0.329634	0.112601	1.588e-05	0.810155	0.26276	0.00016311	ILMN_2687040	Mus musculus enoyl Coenzyme A hydratase domain containing 2 (Echdc2), mRNA.
274	MRPL10	R1ML0 RFL+	R2ML0 RFL+	0.00641353	0.0841754	0.29989	0.91973	0.076473	3.35e-06	0.984927	0.202051	4.475e-05	ILMN_2822622	Mus musculus mitochondrial ribosomal protein L10 (Mrpl10), mRNA.
275	ACAD8	R1ML0 RFL+	R2ML0 RFL+	-0.0298045	0.185553	0.383301	0.808226	0.105084	0.00024313	0.961873	0.250751	0.00159013	ILMN_2615170
276	GABARAPL1	R1ML0 RFL+	R2ML0 RFL+	-0.0858195	0.0898947	0.603601	0.581845	0.453226	0.00021995	0.906711	0.637817	0.00146463	ILMN_1236958	Mus musculus gamma-aminobutyric acid (GABA(A)) receptor-associated protein-like 1 (Gabarapl1), mRNA.
277	DCTN3	R1ML0 RFL+	R2ML0 RFL+	-0.150752	0.0586053	0.640702	0.201314	0.431769	0	0.724513	0.619209	2e-08	ILMN_1227925	Mus musculus dynactin 3 (Dctn3), mRNA.
278	MRPL12	R1ML0 RFL+	R2ML+ RFL+	-0.138662	0.179053	0.446497	0.0860678	0.00563495	4.16e-06	0.61717	0.0308613	5.384e-05	ILMN_2883147	Mus musculus mitochondrial ribosomal protein L12 (Mrpl12), mRNA.
279	GRPEL1	R1ML0 RFL+	R2ML0 RFL+	0.0253459	0.102965	0.382804	0.650633	0.067003	6.031e-05	0.92662	0.183911	0.00049577	ILMN_2945806	Mus musculus GrpE-like 1, mitochondrial (Grpel1), mRNA.
280	TPRKB	R1ML0 RFL+	R2ML0 RFL+	0.18085	0.295588	0.601732	0.10365	0.0485063	0.00068018	0.644616	0.146436	0.00374592	ILMN_2644950	Mus musculus Tp53rk binding protein (Tprkb), mRNA.
281	TPRKB	R1ML0 RFL+	R2ML+ RFL+	0.295925	0.383044	0.654101	0.00558705	0.00595218	2.27e-06	0.310087	0.0320791	3.266e-05	ILMN_2811240	Mus musculus Tp53rk binding protein (Tprkb), mRNA.
282	1200015F23RIK	R1ML0 RFL+	R2ML+ RFL+	-0.111632	0.197035	0.523054	0.399262	0.00939783	1.62e-06	0.845744	0.0446966	2.481e-05	ILMN_3071764	Mus musculus RIKEN cDNA 1200015F23 gene (1200015F23Rik), mRNA. XM_924991
283	SH3GLB2	R1ML0 RFL+	R2ML+ RFL+	-0.00104511	0.30086	0.326286	0.988063	1.261e-05	3.943e-05	0.998084	0.00022383	0.00034725	ILMN_2635240	Mus musculus SH3-domain GRB2-like endophilin B2 (Sh3glb2), mRNA.
284	2410166I05RIK	R1ML0 RFL+	R2ML+ RFL+	-0.0169925	0.206246	0.477577	0.876008	0.00097743	2e-08	0.97605	0.00811032	5.7e-07	ILMN_2629718	Mus musculus RIKEN cDNA 2410166I05 gene (2410166I05Rik), mRNA.
285	CLPP	R1ML0 RFL+	R2ML+ RFL+	-0.0424511	0.23193	0.39211	0.58478	5.778e-05	1.039e-05	0.907729	0.00079651	0.00011484	ILMN_2982890	Mus musculus caseinolytic peptidase, ATP-dependent, proteolytic subunit homolog (E. coli) (Clpp), mRNA.
286	MRPL11	R1ML0 RFL+	R2ML0 RFL+	-0.136571	0.217833	0.483958	0.12196	0.0264353	6e-08	0.663565	0.0947829	1.74e-06	ILMN_1232776	Mus musculus mitochondrial ribosomal protein L11 (Mrpl11), mRNA.
287	NDUFS6	R1ML0 RFL+	R2ML+ RFL+	-0.140361	0.213377	0.50322	0.106731	0.00472801	1e-07	0.648425	0.0270773	2.55e-06	ILMN_2842572	Mus musculus NADH dehydrogenase (ubiquinone) Fe-S protein 6 (Ndufs6), mRNA.
288	COPS7A	R1ML0 RFL+	R2ML+ RFL+	-0.109947	0.262386	0.431449	0.201813	0.00029902	2.86e-06	0.725007	0.00311095	3.919e-05	ILMN_1217296	Mus musculus COP9 (constitutive photomorphogenic) homolog, subunit 7a (Arabidopsis thaliana) (Cops7a), mRNA.
289	VPS25	R1ML0 RFL+	R2ML+ RFL+	-0.145451	0.169596	0.496842	0.0828154	0.0102312	3.6e-07	0.611997	0.0474828	7.17e-06	ILMN_3000008	Mus musculus vacuolar protein sorting 25 (yeast) (Vps25), mRNA.
290	VPS25	R1ML0 RFL+	R2ML+ RFL+	-0.0188496	0.163746	0.473875	0.812653	0.00080159	1.81e-06	0.962335	0.00692383	2.725e-05	ILMN_1259848	Mus musculus vacuolar protein sorting 25 (yeast) (Vps25), mRNA.
291	CIDEB	R1ML0 RFL+	R2ML0 RFL+	-0.0563008	0.0970088	0.732902	0.68878	0.275195	4.92e-06	0.933641	0.467647	6.194e-05	ILMN_3160626	Mus musculus cell death-inducing DNA fragmentation factor, alpha subunit-like effector B (Cideb), mRNA.
292	COASY	R1ML0 RFL+	R2ML0 RFL+	-0.0964286	0.155833	0.669217	0.294738	0.022796	1.31e-06	0.789585	0.084891	2.078e-05	ILMN_2741236
293	HAGH	R1ML0 RFL+	R2ML0 RFL+	-0.133173	0.185518	0.711932	0.350469	0.170818	9.6e-07	0.821206	0.346436	1.611e-05	ILMN_2734661	Mus musculus hydroxyacyl glutathione hydrolase (Hagh), mRNA.
294	PPCS	R1ML0 RFL+	R2ML+ RFL+	-0.174338	0.281947	0.558381	0.100072	0.00747737	8.8e-07	0.640612	0.0378315	1.493e-05	ILMN_2740494
295	PSMG3	R1ML0 RFL+	R2ML0 RFL+	-0.164451	0.142596	0.373688	0.124486	0.068207	0	0.664604	0.186439	4e-08	ILMN_2695599	Mus musculus RIKEN cDNA 1810042K04 gene (1810042K04Rik), mRNA.
296	TEX264	R1ML0 RFL+	R2ML0 RFL+	-0.113406	0.0937368	0.434711	0.299592	0.265185	2.65e-06	0.793196	0.457745	3.688e-05	ILMN_1247681
297	2410091C18RIK	R1ML0 RFL+	R2ML0 RFL+	-0.0290075	0.109921	0.324872	0.688947	0.0487908	6.103e-05	0.933641	0.147157	0.00050103	ILMN_2598520	Mus musculus RIKEN cDNA 2410091C18 gene (2410091C18Rik), transcript variant 1, mRNA.
298	GALM	R1ML0 RFL+	R2ML+ RFL+	0.0826767	0.575439	0.862985	0.589842	0.00011924	9.48e-06	0.908466	0.00147458	0.00010668	ILMN_2687156	Mus musculus galactose mutarotase (Galm), mRNA.
299	PEX5	R1ML0 RFL+	R2ML+ RFL+	-0.0249173	0.279202	0.556354	0.830977	0.00242456	1.3e-06	0.96576	0.0162886	2.062e-05	ILMN_1226978
300	IARS2	R1ML0 RFL+	R2ML+ RFL+	0.0102406	0.443693	0.52958	0.915952	2.21e-06	2.04e-06	0.984165	4.94e-05	3.005e-05	ILMN_3146224	Mus musculus isoleucine-tRNA synthetase 2, mitochondrial (Iars2), mRNA.
301	COX6B1	R1ML0 RFL+	R2ML+ RFL+	-0.0580902	0.251886	0.349738	0.524629	0.00489106	4.006e-05	0.892161	0.0277672	0.00035162	ILMN_2616405	Mus musculus cytochrome c oxidase, subunit VIb polypeptide 1 (Cox6b1), mRNA.
302	COX6B1	R1ML0 RFL+	R2ML+ RFL+	0.0023609	0.274123	0.572589	0.981394	0.00105934	2.2e-07	0.996603	0.00864554	4.84e-06	ILMN_1254971	Mus musculus cytochrome c oxidase, subunit VIb polypeptide 1 (Cox6b1), mRNA.
303	NDUFA9	R1ML0 RFL+	R2ML+ RFL+	-0.0518271	0.292482	0.449333	0.502058	0.00043341	3.2e-07	0.88668	0.00422027	6.45e-06	ILMN_2657694	Mus musculus NADH dehydrogenase (ubiquinone) 1 alpha subcomplex, 9 (Ndufa9), mRNA.
304	MRPL48	R1ML0 RFL+	R2ML+ RFL+	0.0156391	0.326877	0.367402	0.859832	1.81e-06	1.84e-05	0.972325	4.128e-05	0.00018423	ILMN_2663679	Mus musculus mitochondrial ribosomal protein L48 (Mrpl48), transcript variant 1, mRNA.
305	MRPL48	R1ML0 RFL+	R2ML+ RFL+	-0.0729098	0.196114	0.366518	0.455007	0.00037782	4.998e-05	0.868395	0.00377039	0.00042274	ILMN_1216122	Mus musculus mitochondrial ribosomal protein L48 (Mrpl48), transcript variant 1, mRNA.
306	FAHD2A	R1ML0 RFL+	R2ML0 RFL+	-0.0555789	0.320254	0.506601	0.622173	0.0303555	2.678e-05	0.918432	0.105049	0.00025154	ILMN_2882425	Mus musculus fumarylacetoacetate hydrolase domain containing 2A (Fahd2a), mRNA.
307	FAHD2A	R1ML0 RFL+	R2ML0 RFL+	-0.0169474	0.196053	0.443515	0.894148	0.103975	6.846e-05	0.97981	0.248868	0.00055272	ILMN_1214593	Mus musculus fumarylacetoacetate hydrolase domain containing 2A (Fahd2a), mRNA.
308	FAHD2A	R1ML0 RFL+	R2ML0 RFL+	0.000511278	0.290702	0.672217	0.997636	0.0449344	6.3e-06	0.999458	0.139219	7.597e-05	ILMN_2701855
309	FAHD2A	R1ML0 RFL+	R2ML0 RFL+	-0.0246015	0.0641842	0.40436	0.859393	0.593177	0.00273217	0.972152	0.750216	0.0118555	ILMN_1245115
310	MTRF1	R1ML0 RFL+	R2ML0 RFL+	-0.00636842	0.225632	0.350476	0.922373	0.0290999	2.644e-05	0.985123	0.101879	0.00024875	ILMN_2955322	Mus musculus mitochondrial translational release factor 1 (Mtrf1), mRNA.
311	HDHD2	R1ML0 RFL+	R2ML0 RFL+	-0.0322331	0.212553	0.269595	0.661147	0.0250833	0.00032838	0.928876	0.0911045	0.00204877	ILMN_2745240
312	MPDU1	R1ML0 RFL+	R2ML0 RFL+	-0.0440602	0.0298684	0.37397	0.406963	0.604701	1.4e-07	0.848478	0.759081	3.28e-06	ILMN_2685811	Mus musculus mannose-P-dolichol utilization defect 1 (Mpdu1), mRNA.
313	ABHD11	R1ML0 RFL+	R2ML0 RFL+	-0.00888722	0.137351	0.536345	0.900609	0.0266012	9.3e-07	0.981719	0.0952022	1.565e-05	ILMN_2453209	Mus musculus abhydrolase domain containing 11 (Abhd11), mRNA.
314	LOC100041835	R1ML0 RFL+	R2ML0 RFL+	-0.075594	0.0875965	0.601292	0.398865	0.285631	1.5e-06	0.845679	0.478371	2.326e-05	ILMN_1230991
315	EXOSC7	R1ML0 RFL+	R2ML+ RFL+	-0.0485188	0.178386	0.369664	0.393613	0.00131276	8.3e-07	0.843593	0.0103036	1.416e-05	ILMN_2715289
316	RNF5	R1ML0 RFL+	R2ML+ RFL+	0.103699	0.369342	0.7325	0.347578	0.00026641	8e-08	0.818868	0.00283596	2.12e-06	ILMN_3161066
317	SLC22A18	R1ML0 RFL+	R2ML0 RFL+	0.0526541	0.195535	0.67017	0.649286	0.0226472	2.022e-05	0.926521	0.0844283	0.0001997	ILMN_3152079	Mus musculus solute carrier family 22 (organic cation transporter), member 18 (Slc22a18), transcript variant 1, mRNA.
318	APOA1BP	R1ML0 RFL+	R2ML+ RFL+	-0.0278571	0.188667	0.411301	0.681622	0.00029258	1.195e-05	0.932242	0.00306124	0.00012853	ILMN_2997923	Mus musculus apolipoprotein A-I binding protein (Apoa1bp), mRNA.
319	MRPS16	R1ML0 RFL+	R2ML+ RFL+	0.0633459	0.349132	0.617497	0.522049	0.00015645	3.126e-05	0.891933	0.0018408	0.00028759	ILMN_2619671	Mus musculus mitochondrial ribosomal protein S16 (Mrps16), mRNA.
320	LAGE3	R1ML0 RFL+	R2ML+ RFL+	0.107744	0.200982	0.404949	0.110876	0.00257734	3.979e-05	0.652853	0.0170169	0.00034968	ILMN_2679532	Mus musculus L antigen family, member 3 (Lage3), mRNA.
321	MKKS	R1ML0 RFL+	R2ML0 RFL+	0.0338872	0.175482	0.4805	0.711308	0.0483704	2.4e-07	0.940136	0.146181	5.08e-06	ILMN_1257332	Mus musculus McKusick-Kaufman syndrome protein (Mkks), mRNA.
322	NDUFB7	R1ML0 RFL+	R2ML0 RFL+	0.0557218	0.149912	0.46639	0.553097	0.0688113	4.14e-06	0.899513	0.187632	5.367e-05	ILMN_2717460	Mus musculus NADH dehydrogenase (ubiquinone) 1 beta subcomplex, 7 (Ndufb7), mRNA.
323	BNIP1	R1ML0 RFL+	R2ML0 RFL+	-0.0597218	0.0762544	0.339354	0.247895	0.216939	7.75e-06	0.761966	0.402097	9.058e-05	ILMN_2648648
324	PEX11C	R1ML0 RFL+	R2ML0 RFL+	-0.0555714	0.0766667	0.54981	0.613674	0.48256	3.697e-05	0.916225	0.662442	0.00032953	ILMN_2715661
325	CBX5	R1ML0 RFL+	R2ML+ RFL+	-0.00460902	0.193772	0.26231	0.910263	0.00550924	9.1e-07	0.98318	0.030354	1.533e-05	ILMN_3055904	Mus musculus chromobox homolog 5 (Drosophila HP1a) (Cbx5), transcript variant 2, mRNA.
326	GLYCTK	R1ML0 RFL+	R2ML0 RFL+	-0.119684	0.119982	0.368589	0.0967286	0.0472215	0	0.635772	0.143757	2e-08	ILMN_3029434	Mus musculus RIKEN cDNA 6230410P16 gene (6230410P16Rik), transcript variant 1, mRNA.
327	RAD51L3	R1ML0 RFL+	R2ML+ RFL+	0.00654135	0.182018	0.32253	0.90362	0.00521786	0	0.982289	0.0291151	1.7e-07	ILMN_2755140
328	1500032L24RIK	R1ML0 RFL+	R2ML+ RFL+	-0.0702782	0.209579	0.526619	0.348711	0.00414938	0	0.819719	0.0245119	3e-08	ILMN_2648580
329	BANF1	R1ML0 RFL+	R2ML+ RFL+	0.0114286	0.409	0.699458	0.878572	0.00034406	0	0.976708	0.00349597	0	ILMN_2685806	Mus musculus barrier to autointegration factor 1 (Banf1), transcript variant 1, mRNA.
330	BANF1	R1ML0 RFL+	R2ML+ RFL+	0.010594	0.34157	0.531964	0.887705	0.00172951	0	0.97886	0.012651	1e-08	ILMN_2745971	Mus musculus barrier to autointegration factor 1 (Banf1), transcript variant 1, mRNA.
331	BANF1	R1ML0 RFL+	R2ML+ RFL+	0.0395038	0.301456	0.412869	0.565995	0.00196942	2.6e-07	0.90235	0.0139857	5.53e-06	ILMN_2698392	Mus musculus barrier to autointegration factor 1 (Banf1), transcript variant 1, mRNA.
332	BANF1	R1ML0 RFL+	R2ML+ RFL+	0.035406	0.39043	0.556405	0.654928	0.00014812	0	0.926805	0.00175804	1.5e-07	ILMN_3158909	Mus musculus barrier to autointegration factor 1 (Banf1), transcript variant 2, mRNA.
333	5330431N19RIK	R1ML0 RFL+	R2ML0 RFL+	-0.0440752	0.218211	0.412869	0.510655	0.0257027	0	0.889407	0.0928164	1.7e-07	ILMN_1237049	Mus musculus RIKEN cDNA 5330431N19 gene (5330431N19Rik), mRNA.
334	MYLK	R1ML0 RFL+	R2ML+ RFL+	0.107045	0.350307	0.403542	0.207098	0.00029487	5e-08	0.729382	0.00307895	1.39e-06	ILMN_1219471
335	MYLK	R1ML0 RFL+	R2ML+ RFL+	0.0873759	0.356947	0.54331	0.340128	0.00132737	0	0.815034	0.0103708	1.9e-07	ILMN_2662602
336	5430437P03RIK	R1ML0 RFL+	R2ML0 RFL+	-0.00154135	0.190982	0.42586	0.982327	0.0207073	5e-08	0.996774	0.0791089	1.46e-06	ILMN_2801798	Mus musculus RIKEN cDNA 5430437P03 gene (5430437P03Rik), mRNA.
337	SPR	R1ML0 RFL+	R2ML0 RFL+	-0.0156316	0.141368	0.558967	0.837269	0.0296064	8.1e-07	0.966786	0.103131	1.387e-05	ILMN_2610531	Mus musculus sepiapterin reductase (Spr), mRNA.
338	FIBP	R1ML0 RFL+	R2ML0 RFL+	0.0635564	0.114342	0.531211	0.254746	0.0842776	0	0.766088	0.215905	0	ILMN_2674132
339	POLR2E	R1ML0 RFL+	R2ML+ RFL+	0.00187218	0.196325	0.48069	0.981606	0.00821647	0	0.996615	0.0404868	6e-08	ILMN_2709446
340	POLR2E	R1ML0 RFL+	R2ML+ RFL+	-0.0209398	0.184632	0.549375	0.77345	0.00100406	0	0.95501	0.00828027	6e-08	ILMN_1234905
341	ELMOD3	R1ML0 RFL+	R2ML0 RFL+	0.014	0.127333	0.290815	0.650601	0.0532396	1.4e-06	0.92662	0.156158	2.179e-05	ILMN_2748742	Mus musculus RNA binding motif and ELMO domain 1 (Rbed1), mRNA.
342	ETFB	R1ML0 RFL+	R2ML0 RFL+	-0.0736316	0.0135351	0.52694	0.217169	0.860032	3.6e-07	0.73723	0.925587	7.06e-06	ILMN_2627895	Mus musculus electron transferring flavoprotein, beta polypeptide (Etfb), mRNA.
343	ETFB	R1ML0 RFL+	R2ML0 RFL+	-0.101383	-0.013693	0.683158	0.106261	0.855998	1.1e-07	0.647215	0.923334	2.83e-06	ILMN_3104414	Mus musculus electron transferring flavoprotein, beta polypeptide (Etfb), mRNA.
344	GALK1	R1ML0 RFL+	R2ML0 RFL+	-0.00766165	0.298553	0.649304	0.954994	0.0451204	1.597e-05	0.991008	0.139542	0.00016396	ILMN_2721360
345	NDUFA2	R1ML0 RFL+	R2ML+ RFL+	-0.106098	0.241974	0.298804	0.0276059	1.61e-06	3.08e-06	0.467934	3.733e-05	4.167e-05	ILMN_2588601	Mus musculus NADH dehydrogenase (ubiquinone) 1 alpha subcomplex, 2 (Ndufa2), mRNA.
346	UBL4	R1ML0 RFL+	R2ML0 RFL+	-0.149669	0.14114	0.32828	0.0722905	0.0224038	4.818e-05	0.59373	0.083886	0.00041041	ILMN_2466034	Mus musculus ubiquitin-like 4 (Ubl4), mRNA.
347	PDRG1	R1ML0 RFL+	R2ML0 RFL+	-0.161226	0.0782982	0.451759	0.0589122	0.318621	0	0.568844	0.512152	0	ILMN_1249417
348	MNAT1	R1ML0 RFL+	R2ML+ RFL+	0.0144887	0.262798	0.326452	0.84656	0.00163812	5.23e-06	0.969603	0.0121614	6.501e-05	ILMN_2758631
349	MNAT1	R1ML0 RFL+	R2ML+ RFL+	0.0229699	0.288851	0.336988	0.708982	4.725e-05	1.58e-06	0.939439	0.00067376	2.43e-05	ILMN_2758632
350	NUP37	R1ML0 RFL+	R2ML+ RFL+	0.0250301	0.186482	0.242571	0.583845	1.002e-05	5.5e-07	0.906954	0.00018453	1.009e-05	ILMN_1220943	Mus musculus nucleoporin 37 (Nup37), mRNA.
351	PPIE	R1ML0 RFL+	R2ML+ RFL+	0.0100376	0.214895	0.268223	0.832069	0.00033498	9.5e-06	0.965871	0.00341997	0.00010684	ILMN_2970691	Mus musculus peptidylprolyl isomerase E (cyclophilin E) (Ppie), mRNA.
352	2410015M20RIK	R1ML0 RFL+	R2ML0 RFL+	0.00137594	0.083614	0.258387	0.984606	0.343662	0.00118521	0.997243	0.536778	0.00592077	ILMN_1230931	Mus musculus RIKEN cDNA 2410015M20 gene (2410015M20Rik), mRNA.
353	ABHD14B	R1ML0 RFL+	R2ML0 RFL+	-0.0134286	0.111833	0.264554	0.805437	0.100775	0.00670765	0.961594	0.244027	0.0248582	ILMN_3007862	Mus musculus abhydrolase domain containing 14b (Abhd14b), mRNA.
354	GSTZ1	R1ML0 RFL+	R2ML+ RFL+	-0.0331654	0.21293	0.309851	0.599453	3.518e-05	2.622e-05	0.910787	0.00053015	0.00024701	ILMN_1229964	Mus musculus glutathione transferase zeta 1 (maleylacetoacetate isomerase) (Gstz1), mRNA.
355	PIPOX	R1ML0 RFL+	R2ML+ RFL+	0.217421	0.480088	0.637045	0.0472408	0.00319661	0.00011052	0.541585	0.0200105	0.00082898	ILMN_2689581	Mus musculus pipecolic acid oxidase (Pipox), mRNA.
356	AFMID	R1ML0 RFL+	R2ML0 RFL+	0.100955	0.24336	0.723902	0.638108	0.211318	0.00019022	0.923722	0.39605	0.00129936	ILMN_2702894	Mus musculus arylformamidase (Afmid), mRNA.
357	AFMID	R1ML0 RFL+	R2ML0 RFL+	0.165617	0.201307	0.63586	0.431054	0.301513	0.00018212	0.858732	0.494259	0.00125431	ILMN_2702893	Mus musculus arylformamidase (Afmid), mRNA.
358	AFMID	R1ML0 RFL+	R2ML0 RFL+	0.0778346	0.269596	0.672792	0.712193	0.142485	9.031e-05	0.940136	0.307477	0.00069671	ILMN_2626209	Mus musculus arylformamidase (Afmid), mRNA.
359	AFMID	R1ML0 RFL+	R2ML0 RFL+	0.170075	0.362289	0.593631	0.35657	0.0489364	0.00013268	0.823472	0.147438	0.00096664	ILMN_2742295	Mus musculus arylformamidase (Afmid), mRNA.
360	AFMID	R1ML0 RFL+	R2ML0 RFL+	0.0275263	0.378193	0.689119	0.89831	0.0964763	0.00055206	0.981556	0.237103	0.00314899	ILMN_2597013	Mus musculus arylformamidase (Afmid), mRNA.
361	AFMID	R1ML0 RFL+	R2ML0 RFL+	0.202865	0.392912	0.57211	0.233255	0.052271	0.00053071	0.749995	0.154268	0.00305254	ILMN_2827607	Mus musculus arylformamidase (Afmid), mRNA.
362	CAR14	R1ML0 RFL+	R2ML0 RFL+	0.0847368	0.31707	0.707833	0.720813	0.294016	7.441e-05	0.942438	0.486436	0.00059361	ILMN_2973824	Mus musculus carbonic anhydrase 14 (Car14), mRNA.
363	ETHE1	R1ML0 RFL+	R2ML+ RFL+	-0.0214286	0.553667	0.828048	0.920859	0.00022602	9.01e-06	0.984927	0.00247463	0.00010235	ILMN_2621074
364	SPC24	R1ML0 RFL+	R2ML0 RFL+	-0.0890075	0.268088	0.56231	0.436475	0.037717	3.431e-05	0.860009	0.123043	0.00030982	ILMN_2615709	Mus musculus SPC24, NDC80 kinetochore complex component, homolog (S. cerevisiae) (Spc24), mRNA.
365	1110031B06RIK	R1ML0 RFL+	R2ML+ RFL+	0.100075	0.396789	0.387006	0.216053	0.00172736	9.83e-06	0.736721	0.0126389	0.00011005	ILMN_2710151
366	1110057K04RIK	R1ML0 RFL+	R2ML+ RFL+	0.0109925	0.339254	0.435696	0.899573	0.00899903	3.5e-07	0.981719	0.0432644	6.97e-06	ILMN_2967362	Mus musculus RIKEN cDNA 1110057K04 gene (1110057K04Rik), mRNA.
367	COMMD6	R1ML0 RFL+	R2ML+ RFL+	-0.00261654	0.293026	0.316027	0.9735	0.00047445	0.00016099	0.994674	0.00453228	0.00113121	ILMN_2993720	Mus musculus COMM domain containing 6 (Commd6), mRNA. XM_919080
368	MRPL49	R1ML0 RFL+	R2ML+ RFL+	-0.055985	0.344825	0.323732	0.407086	0.00018159	2.1e-07	0.848478	0.00206656	4.67e-06	ILMN_2628672	Mus musculus mitochondrial ribosomal protein L49 (Mrpl49), mRNA.
369	WBP1	R1ML0 RFL+	R2ML0 RFL+	0.0505714	0.2195	0.392074	0.49048	0.0203247	4e-08	0.882005	0.0781022	1.26e-06	ILMN_2454788	Mus musculus WW domain binding protein 1 (Wbp1), mRNA.
370	WBP1	R1ML0 RFL+	R2ML+ RFL+	0.0989323	0.370789	0.419152	0.154118	0.00147254	1e-08	0.691947	0.0112451	3.9e-07	ILMN_2951120	Mus musculus WW domain binding protein 1 (Wbp1), mRNA.
371	DHRS7B	R1ML0 RFL+	R2ML+ RFL+	0.000526316	0.363693	0.519098	0.996628	0.0027297	1e-07	0.999458	0.0177582	2.5e-06	ILMN_1255146	Mus musculus dehydrogenase/reductase (SDR family) member 7B (Dhrs7b), mRNA.
372	DHRS7B	R1ML0 RFL+	R2ML+ RFL+	-0.0520526	0.322114	0.414292	0.640325	0.00303681	4.447e-05	0.923957	0.0192446	0.00038414	ILMN_3039637	Mus musculus dehydrogenase/reductase (SDR family) member 7B (Dhrs7b), mRNA.
373	DHRS7B	R1ML0 RFL+	R2ML+ RFL+	0.0358872	0.308149	0.252908	0.707561	0.00391993	0.00437748	0.939215	0.0234913	0.0175133	ILMN_3114114	Mus musculus dehydrogenase/reductase (SDR family) member 7B (Dhrs7b), mRNA.
374	MRPL43	R1ML0 RFL+	R2ML+ RFL+	0.0333684	0.231035	0.493982	0.684272	0.00218143	1.8e-06	0.932618	0.0151299	2.704e-05	ILMN_2633805
375	SPSB2	R1ML0 RFL+	R2ML+ RFL+	0.0436241	0.215386	0.394024	0.45182	0.00457018	7.3e-07	0.866754	0.0264564	1.27e-05	ILMN_1254644	Mus musculus splA/ryanodine receptor domain and SOCS box containing 2 (Spsb2), mRNA.
376	N6AMT2	R1ML0 RFL+	R2ML+ RFL+	0.0792406	0.47386	0.597714	0.382518	1.48e-06	2e-08	0.838497	3.462e-05	6.1e-07	ILMN_1235697	Mus musculus N-6 adenine-specific DNA methyltransferase 2 (putative) (N6amt2), mRNA.
377	1500032D16RIK	R1ML0 RFL+	R2ML+ RFL+	-0.0159474	0.260886	0.436798	0.809503	1.12e-05	3.2e-07	0.961873	0.00020199	6.51e-06	ILMN_2668977	Mus musculus RIKEN cDNA 1500032D16 gene (1500032D16Rik), mRNA.
378	VAC14	R1ML0 RFL+	R2ML+ RFL+	-0.0130226	0.16643	0.331357	0.769347	0.00479007	1e-08	0.953433	0.0273473	4.6e-07	ILMN_2690506	Mus musculus Vac14 homolog (S. cerevisiae) (Vac14), mRNA.
379	TSSC1	R1ML0 RFL+	R2ML+ RFL+	-0.119429	0.266833	0.354771	0.0785838	0.0002088	2.33e-06	0.607694	0.00231677	3.333e-05	ILMN_2457326	Mus musculus tumor suppressing subtransferable candidate 1 (Tssc1), mRNA.
380	TSSC1	R1ML0 RFL+	R2ML+ RFL+	-0.0919549	0.24664	0.281387	0.197888	0.00050083	2.7e-06	0.722524	0.00472614	3.743e-05	ILMN_2457324	Mus musculus tumor suppressing subtransferable candidate 1 (Tssc1), mRNA.
381	COX7A1	R1ML0 RFL+	R2ML+ RFL+	0.0227895	0.288123	0.300616	0.698986	0.00042663	1.265e-05	0.936607	0.00416852	0.00013487	ILMN_1240857
382	1700040I03RIK	R1ML0 RFL+	R2ML+ RFL+	0.0566391	0.282211	0.270375	0.379594	0.00020537	3.86e-06	0.836872	0.00228954	5.062e-05	ILMN_2881024	Mus musculus RIKEN cDNA 1700040I03 gene (1700040I03Rik), mRNA. XM_923066 XM_978905 XM_981332 XM_981367 XM_981402 XM_990015 XM_991725
383	9430023L20RIK	R1ML0 RFL+	R2ML+ RFL+	0.105586	0.230491	0.396256	0.157923	0.00246838	7.1e-07	0.694853	0.0164925	1.254e-05	ILMN_1238679	Mus musculus RIKEN cDNA 9430023L20 gene (9430023L20Rik), mRNA.
384	PSMG2	R1ML0 RFL+	R2ML+ RFL+	0.0445338	0.280105	0.523003	0.385064	9.364e-05	9e-08	0.839159	0.00119712	2.37e-06	ILMN_3074516	Mus musculus tumor necrosis factor superfamily, member 5-induced protein 1 (Tnfsf5ip1), mRNA.
385	2600009E05RIK	R1ML0 RFL+	R2ML0 RFL+	-0.0724211	0.0995789	0.330524	0.365534	0.170825	7.22e-06	0.829722	0.346436	8.53e-05	ILMN_2874128	Mus musculus RIKEN cDNA 2600009E05 gene (2600009E05Rik), mRNA. XM_925578 XM_925581 XM_925583 XM_994018 XM_994040 XM_994059 XM_994077
386	DDRGK1	R1ML0 RFL+	R2ML0 RFL+	-0.103962	0.0328947	0.291839	0.16546	0.370599	0.00021327	0.699794	0.563109	0.00142659	ILMN_2615854
387	NDUFV1	R1ML0 RFL+	R2ML0 RFL+	-0.112391	0.0848947	0.289131	0.128653	0.106387	0.00130444	0.669637	0.252712	0.00640307	ILMN_2702704
388	ABCF2	R1ML0 RFL+	R2ML+ RFL+	-0.0541579	0.252175	0.449318	0.55971	0.00122851	2.965e-05	0.901436	0.00976162	0.00027407	ILMN_2789544	Mus musculus ATP-binding cassette, sub-family F (GCN20), member 2 (Abcf2), mRNA.
389	ATAD3A	R1ML0 RFL+	R2ML0 RFL+	-0.0697068	0.114246	0.400714	0.489309	0.119986	0.00049055	0.881474	0.274142	0.0028625	ILMN_2826709	Mus musculus ATPase family, AAA domain containing 3A (Atad3a), mRNA.
390	LOC100044172	R1ML0 RFL+	R2ML+ RFL+	-0.0639248	0.217289	0.365583	0.327557	0.0005775	0.00045048	0.809543	0.00529052	0.00267283	ILMN_1218584	Mus musculus ribonuclease P 14 subunit (human) (Rpp14), mRNA.
391	CYP4F13	R1ML0 RFL+	R2ML0 RFL+	-0.0149549	0.148974	0.425735	0.838544	0.0822984	0.00154461	0.967476	0.212545	0.00737477	ILMN_3006911	Mus musculus cytochrome P450, family 4, subfamily f, polypeptide 13 (Cyp4f13), mRNA.
392	UBXN6	R1ML0 RFL+	R2ML0 RFL+	-0.0520977	0.119474	0.373557	0.20797	0.177303	1.974e-05	0.729831	0.354401	0.00019597	ILMN_1234318	Mus musculus UBX domain containing 1 (Ubxd1), mRNA.
393	2810002N01RIK	R1ML0 RFL+	R2ML0 RFL+	-0.132564	0.139579	0.306268	0.0695309	0.0803037	0.00063288	0.587987	0.20861	0.00353134	ILMN_1217827	Mus musculus RIKEN cDNA 2810002N01 gene (2810002N01Rik), mRNA.
394	CLEC1A	R1ML0 RFL+	R2ML0 RFL+	-0.0295038	0.0575439	0.273571	0.42631	0.0700131	7.3e-07	0.857575	0.189801	1.27e-05	ILMN_2732090	Mus musculus C-type lectin domain family 1, member a (Clec1a), mRNA.
395	PTTG1IP	R1ML0 RFL+	R2ML0 RFL+	-0.0858722	0.0730088	0.30122	0.106938	0.023014	7.973e-05	0.648425	0.0855227	0.00062697	ILMN_2616309	Mus musculus pituitary tumor-transforming 1 interacting protein (Pttg1ip), mRNA.
396	A430005L14RIK	R1ML0 RFL+	R2ML0 RFL+	-0.035594	0.129096	0.269708	0.587769	0.0418995	0.00011989	0.907882	0.132483	0.00088811	ILMN_1257788	Mus musculus RIKEN cDNA A430005L14 gene (A430005L14Rik), mRNA.
397	ARD1	R1ML0 RFL+	R2ML0 RFL+	-0.052782	0.159123	0.30525	0.445312	0.0520229	1.115e-05	0.86404	0.153666	0.00012156	ILMN_2744280
398	AUP1	R1ML0 RFL+	R2ML0 RFL+	-0.129639	0.0152895	0.450705	0.224476	0.838619	1.9e-07	0.742944	0.913858	4.23e-06	ILMN_1252199
399	EIF3I	R1ML0 RFL+	R2ML0 RFL+	-0.0939023	0.129193	0.547009	0.200032	0.0980568	5e-08	0.723844	0.239558	1.43e-06	ILMN_1258633	Mus musculus eukaryotic translation initiation factor 3, subunit I (Eif3i), mRNA.
400	BC046331	R1ML0 RFL+	R2ML0 RFL+	-0.0734586	0.170851	0.181768	0.167715	0.024181	0.00057807	0.700884	0.0886797	0.00327196	ILMN_1240038
401	4930504E06RIK	R1ML0 RFL+	R2ML0 RFL+	-0.0358496	0.177579	0.309414	0.775935	0.0447305	3.204e-05	0.955462	0.138788	0.00029318	ILMN_2630827	Mus musculus RIKEN cDNA 4930504E06 gene (4930504E06Rik), mRNA.
402	BPNT1	R1ML0 RFL+	R2ML0 RFL+	-0.0905639	0.182412	0.324994	0.406337	0.0470631	0.00011492	0.848155	0.143513	0.00085844	ILMN_2601515
403	BPNT1	R1ML0 RFL+	R2ML0 RFL+	-0.0233459	0.174202	0.433107	0.85831	0.152273	3.75e-06	0.971964	0.321235	4.932e-05	ILMN_2601507
404	FTCD	R1ML0 RFL+	R2ML0 RFL+	-0.123376	0.248886	0.461536	0.151448	0.067374	1.31e-05	0.689279	0.184673	0.00013877	ILMN_1226455	Mus musculus formiminotransferase cyclodeaminase (Ftcd), mRNA.
405	IL1RL1L	R1ML0 RFL+	R2ML0 RFL+	-0.204241	0.113474	0.407726	0.00809767	0.0417496	7e-08	0.342501	0.132205	1.89e-06	ILMN_1214974
406	ELMOD3	R1ML0 RFL+	R2ML0 RFL+	-0.0572707	0.117658	0.27344	0.234019	0.0458949	4.71e-05	0.751228	0.141123	0.00040285	ILMN_2742244	Mus musculus RNA binding motif and ELMO domain 1 (Rbed1), mRNA.
407	COQ5	R1ML0 RFL+	R2ML0 RFL+	-0.152143	0.0958333	0.282667	0.040762	0.280737	9.351e-05	0.523778	0.473368	0.00071772	ILMN_2612738	Mus musculus coenzyme Q5 homolog, methyltransferase (yeast) (Coq5), mRNA.
408	MRPL9	R1ML0 RFL+	R2ML+ RFL+	-0.0606617	0.280219	0.417562	0.621141	0.00584323	1.013e-05	0.917983	0.0316579	0.00011269	ILMN_2679770
409	FXN	R1ML0 RFL+	R2ML0 RFL+	-0.0443609	0.157544	0.32469	0.581747	0.0688971	8.07e-06	0.906711	0.187786	9.368e-05	ILMN_3125363	Mus musculus frataxin (Fxn), mRNA.
410	DOLPP1	R1ML0 RFL+	R2ML+ RFL+	-0.0325639	0.180246	0.259726	0.62089	4.04e-06	1.32e-06	0.917983	8.441e-05	2.079e-05	ILMN_2718090	Mus musculus dolichyl pyrophosphate phosphatase 1 (Dolpp1), mRNA.
411	AGXT2L2	R1ML0 RFL+	R2ML0 RFL+	-0.0596316	0.0543684	0.270795	0.230462	0.252906	2.265e-05	0.748466	0.443855	0.00021942	ILMN_1220417	Mus musculus alanine-glyoxylate aminotransferase 2-like 2 (Agxt2l2), mRNA.
412	AZI2	R1ML0 RFL+	R2ML0 RFL+	-0.0311805	0.0514386	0.186345	0.481282	0.217872	0.00010758	0.877621	0.40313	0.0008101	ILMN_3082580	Mus musculus 5-azacytidine induced gene 2 (Azi2), transcript variant 2, mRNA.
413	ABAT	R1ML0 RFL+	R2ML0 RFL+	-0.123421	0.0352456	0.277458	0.276944	0.722416	0.00714614	0.779406	0.840832	0.0262148	ILMN_2752146	Mus musculus 4-aminobutyrate aminotransferase (Abat), mRNA.
414	ERLIN2	R1ML0 RFL+	R2ML0 RFL+	-0.119383	0.0174737	0.213455	0.045108	0.664184	2.494e-05	0.536182	0.801858	0.00023733	ILMN_1246564	Mus musculus ER lipid raft associated 2 (Erlin2), mRNA.
415	PAFAH2	R1ML0 RFL+	R2ML0 RFL+	-0.0964436	0.163175	0.226199	0.262105	0.0527287	0.00286248	0.768592	0.155031	0.0123273	ILMN_2631894	Mus musculus platelet-activating factor acetylhydrolase 2 (Pafah2), mRNA.
416	PSMD5	R1ML0 RFL+	R2ML0 RFL+	-0.0909774	0.29407	0.263435	0.374287	0.0127333	0.0010204	0.834505	0.0555816	0.00523898	ILMN_2672798	Mus musculus proteasome (prosome, macropain) 26S subunit, non-ATPase, 5 (Psmd5), mRNA.
417	CDK5RAP1	R1ML0 RFL+	R2ML0 RFL+	-0.0107669	0.162114	0.321589	0.882033	0.0133808	5.46e-06	0.977256	0.0575294	6.743e-05	ILMN_2604985
418	WDR8	R1ML0 RFL+	R2ML0 RFL+	-0.0843985	0.135816	0.192568	0.130764	0.0122812	2.708e-05	0.673286	0.0541042	0.00025377	ILMN_1256186
419	IMP4	R1ML0 RFL+	R2ML0 RFL+	-0.119722	0.0835877	0.242676	0.210168	0.226155	6.579e-05	0.731112	0.413101	0.00053429	ILMN_2724643	Mus musculus IMP4, U3 small nucleolar ribonucleoprotein, homolog (yeast) (Imp4), mRNA.
420	2400010D15RIK	R1ML0 RFL+	R2ML+ RFL+	-0.109519	0.233719	0.225226	0.100437	0.00075159	2.644e-05	0.640747	0.00656923	0.00024875	ILMN_2747331
421	ASPH	R1ML0 RFL+	R2ML0 RFL+	-0.0238045	0.136386	0.253387	0.699148	0.0232903	7.6e-07	0.936607	0.0862129	1.324e-05	ILMN_2606990
422	TUBD1	R1ML0 RFL+	R2ML+ RFL+	-0.0251654	0.255096	0.247595	0.689355	0.00263956	6.3e-07	0.933641	0.0173223	1.137e-05	ILMN_2464061
423	NUMB	R1ML0 RFL+	R2ML+ RFL+	0.00224812	0.265939	0.221756	0.959356	0.00210192	5.3e-07	0.992027	0.0146812	9.73e-06	ILMN_2678576
424	SFMBT1	R1ML0 RFL+	R2ML+ RFL+	-0.0157293	0.324675	0.231881	0.661429	0.00548608	3.57e-06	0.929117	0.0302653	4.737e-05	ILMN_2894245	Mus musculus Scm-like with four mbt domains 1 (Sfmbt1), mRNA.
425	2400003C14RIK	R1ML0 RFL+	R2ML+ RFL+	0.0148571	0.203667	0.266741	0.80784	0.00101663	3.6e-07	0.961873	0.00835978	7.09e-06	ILMN_2749955	Mus musculus RIKEN cDNA 2400003C14 gene (2400003C14Rik), mRNA.
426	MAT2B	R1ML0 RFL+	R2ML+ RFL+	-0.0530827	0.300132	0.409881	0.615293	0.00017998	3.87e-06	0.916697	0.00205365	5.073e-05	ILMN_1248381	Mus musculus methionine adenosyltransferase II, beta (Mat2b), mRNA.
427	RAB7	R1ML0 RFL+	R2ML0 RFL+	-0.167263	0.21457	0.373851	0.164903	0.0752309	3.413e-05	0.699794	0.199629	0.00030875	ILMN_2618549	Mus musculus RAB7, member RAS oncogene family (Rab7), mRNA.
428	MED10	R1ML0 RFL+	R2ML0 RFL+	-0.0635338	0.137728	0.435372	0.309983	0.0525029	0	0.7988	0.154723	1e-07	ILMN_2879382	Mus musculus mediator of RNA polymerase II transcription, subunit 10 homolog (NUT2, S. cerevisiae) (Med10), mRNA.
429	NAP1L4	R1ML0 RFL+	R2ML+ RFL+	-0.032188	0.164026	0.263661	0.438796	0.00151072	0.00027076	0.860826	0.0114685	0.00173985	ILMN_2769696
430	5730437N04RIK	R1ML0 RFL+	R2ML0 RFL+	-0.109677	0.114061	0.345574	0.0757532	0.0791394	0.00015756	0.599132	0.206574	0.0011126	ILMN_1218627	Mus musculus RIKEN cDNA 5730437N04 gene (5730437N04Rik), mRNA.
431	EIF5A	R1ML0 RFL+	R2ML+ RFL+	-0.196917	0.249035	0.478074	0.159897	0.00133774	3.5e-07	0.696027	0.0104264	6.93e-06	ILMN_2678828	Mus musculus eukaryotic translation initiation factor 5A (Eif5a), mRNA.
432	GOLGA7	R1ML0 RFL+	R2ML+ RFL+	-0.180744	0.255851	0.420429	0.115678	0.00321401	1.34e-06	0.656921	0.0200677	2.111e-05	ILMN_3157764	Mus musculus golgi autoantigen, golgin subfamily a, 7 (Golga7), transcript variant 2, mRNA.
433	PPP1CA	R1ML0 RFL+	R2ML0 RFL+	-0.130835	0.151904	0.341848	0.328307	0.0456392	2.75e-06	0.809543	0.140606	3.8e-05	ILMN_1246058	Mus musculus protein phosphatase 1, catalytic subunit, alpha isoform (Ppp1ca), mRNA.
434	HNRNPK	R1ML0 RFL+	R2ML+ RFL+	-0.12112	0.443404	0.30008	0.384232	2.851e-05	0.0005867	0.839159	0.00044329	0.00331353	ILMN_1245987	Mus musculus heterogeneous nuclear ribonucleoprotein K (Hnrpk), mRNA.
435	RNF6	R1ML0 RFL+	R2ML+ RFL+	-0.127256	0.212316	0.396848	0.0306744	0.00054065	4.717e-05	0.486647	0.00502458	0.00040312	ILMN_1216416	Mus musculus ring finger protein (C3H2C3 type) 6 (Rnf6), mRNA.
436	DAP3	R1ML0 RFL+	R2ML0 RFL+	-0.0836917	0.183404	0.40344	0.229164	0.0561937	4.9e-07	0.747403	0.162486	9.22e-06	ILMN_2646230	Mus musculus death associated protein 3 (Dap3), mRNA.
437	MAEA	R1ML0 RFL+	R2ML+ RFL+	-0.149135	0.280579	0.393801	0.0204979	0.00415418	1e-08	0.435641	0.0245346	3.8e-07	ILMN_2763602
438	RAB7	R1ML0 RFL+	R2ML0 RFL+	-0.100872	0.235842	0.37708	0.142641	0.0112891	1.31e-06	0.683867	0.0509567	2.074e-05	ILMN_1254837	Mus musculus RAB7, member RAS oncogene family (Rab7), mRNA.
439	SYNGR2	R1ML0 RFL+	R2ML0 RFL+	-0.0492331	0.241053	0.51531	0.537903	0.0382829	0	0.895515	0.124444	1.3e-07	ILMN_2706231	Mus musculus synaptogyrin 2 (Syngr2), mRNA.
440	SYNGR2	R1ML0 RFL+	R2ML+ RFL+	-0.0553684	0.309632	0.486042	0.550585	0.00617774	1e-08	0.898368	0.0329766	3e-07	ILMN_2706232	Mus musculus synaptogyrin 2 (Syngr2), mRNA.
441	SYNGR2	R1ML0 RFL+	R2ML+ RFL+	-0.0117293	0.268675	0.454601	0.887531	0.00682491	1.4e-07	0.978827	0.035401	3.4e-06	ILMN_1244874	Mus musculus synaptogyrin 2 (Syngr2), mRNA.
442	RPL29	R1ML0 RFL+	R2ML0 RFL+	-0.157962	0.0588947	0.25961	0.0901555	0.263543	1.103e-05	0.624141	0.456096	0.00012048	ILMN_2730005	Mus musculus ribosomal protein L29 (Rpl29), mRNA.
443	SUMO3	R1ML0 RFL+	R2ML0 RFL+	-0.0589624	0.190895	0.369345	0.572351	0.0251337	6.641e-05	0.903796	0.0912491	0.00053878	ILMN_2776230
444	SUMO3	R1ML0 RFL+	R2ML0 RFL+	-0.118511	0.0687982	0.383744	0.142182	0.169181	2.44e-06	0.68355	0.34427	3.459e-05	ILMN_2776231
445	CCT3	R1ML0 RFL+	R2ML+ RFL+	-0.101038	0.285939	0.361479	0.211827	0.00090322	1.72e-06	0.732404	0.00760736	2.61e-05	ILMN_1247317	Mus musculus chaperonin subunit 3 (gamma) (Cct3), mRNA.
446	FARSB	R1ML0 RFL+	R2ML0 RFL+	0.0351654	0.234904	0.431583	0.550466	0.0210679	0	0.898307	0.080181	1e-08	ILMN_2614825	Mus musculus phenylalanyl-tRNA synthetase, beta subunit (Farsb), mRNA.
447	ELOVL1	R1ML0 RFL+	R2ML+ RFL+	-0.0868346	0.366237	0.448887	0.297041	0.00032627	4e-08	0.791496	0.00334833	1.12e-06	ILMN_1224780
448	POP7	R1ML0 RFL+	R2ML+ RFL+	-0.0444586	0.210018	0.220226	0.0675602	0.00039954	4.78e-06	0.581586	0.00393822	6.041e-05	ILMN_2619362	Mus musculus processing of precursor 7, ribonuclease P family, (S. cerevisiae) (Pop7), mRNA.
449	NOL12	R1ML0 RFL+	R2ML0 RFL+	0.00566917	0.13936	0.321449	0.921379	0.0141613	6e-08	0.985033	0.0599612	1.75e-06	ILMN_2650775
450	NUBP2	R1ML0 RFL+	R2ML+ RFL+	8.27068e-05	0.277202	0.320497	0.999127	0.0005889	0	0.999678	0.00537583	4e-08	ILMN_2723438	Mus musculus nucleotide binding protein 2 (Nubp2), mRNA.
451	RPL7L1	R1ML0 RFL+	R2ML0 RFL+	-0.088812	0.17664	0.303101	0.172844	0.0297954	3.5e-07	0.70403	0.103632	6.97e-06	ILMN_1249606
452	CDK10	R1ML0 RFL+	R2ML+ RFL+	-0.0180376	0.153105	0.245491	0.777162	0.00033043	0.00024718	0.955462	0.0033815	0.0016121	ILMN_2633872	Mus musculus cyclin-dependent kinase (CDC2-like) 10 (Cdk10), transcript variant 2, mRNA.
453	UBE2I	R1ML0 RFL+	R2ML+ RFL+	0.00244361	0.198991	0.171375	0.969697	0.00238245	0.00014891	0.99379	0.0160814	0.00106207	ILMN_2499058	Mus musculus ubiquitin-conjugating enzyme E2I (Ube2i), mRNA.
454	4833426J09RIK	R1ML0 RFL+	R2ML0 RFL+	-0.0493308	-0.066807	0.285134	0.642795	0.499264	0.00606592	0.92495	0.675703	0.0229263	ILMN_3057482	Mus musculus RIKEN cDNA 4833426J09 gene (4833426J09Rik), mRNA.
455	SEC14L4	R1ML0 RFL+	R2ML0 RFL+	0.0485338	-0.00122807	0.425842	0.702889	0.992652	0.0158951	0.937643	0.996193	0.049564	ILMN_2605013	Mus musculus SEC14-like 4 (S. cerevisiae) (Sec14l4), mRNA.
456	HSPB6	R1ML0 RFL+	R2ML0 RFL+	-0.150511	0.241298	0.39744	0.251775	0.013449	0.00031675	0.763947	0.0576958	0.00198758	ILMN_2805339	Mus musculus heat shock protein, alpha-crystallin-related, B6 (Hspb6), mRNA.
457	LETM1	R1ML0 RFL+	R2ML0 RFL+	-0.0457744	0.147368	0.44836	0.761446	0.0494763	2.549e-05	0.951762	0.148631	0.00024163	ILMN_2755152	Mus musculus leucine zipper-EF-hand containing transmembrane protein 1 (Letm1), mRNA.
458	STRA13	R1ML0 RFL+	R2ML0 RFL+	-0.0503459	0.0820351	0.261286	0.477163	0.168679	3.98e-06	0.875957	0.343576	5.203e-05	ILMN_1226798	Mus musculus stimulated by retinoic acid 13 (Stra13), mRNA.
459	1110020P15RIK	R1ML0 RFL+	R2ML+ RFL+	-0.222774	0.251535	0.197143	0.00172928	0.00176303	0.00177148	0.216768	0.0128319	0.00826918	ILMN_3142224
460	1110020P15RIK	R1ML0 RFL+	R2ML+ RFL+	-0.227955	0.253307	0.203006	0.00557824	0.00278414	0.0022021	0.310087	0.0180712	0.00991023	ILMN_2636384
461	NDUFC1	R1ML0 RFL+	R2ML+ RFL+	-0.181158	0.215842	0.224173	0.0396791	0.00799866	9.777e-05	0.519641	0.0397339	0.00074551	ILMN_1229975	Mus musculus NADH dehydrogenase (ubiquinone) 1, subcomplex unknown, 1 (Ndufc1), mRNA.
462	EG433923	R1ML0 RFL+	R2ML+ RFL+	-0.20018	0.373105	0.302449	0.086001	0.00065385	0.00298851	0.61717	0.00587274	0.012761	ILMN_2905386	Mus musculus predicted gene, EG433923 (EG433923), mRNA.
463	COX6A1	R1ML0 RFL+	R2ML0 RFL+	-0.191008	0.140588	0.258205	0.0956938	0.00823268	0.00066306	0.634265	0.0405191	0.00367452	ILMN_2605400
464	COX6A1	R1ML0 RFL+	R2ML+ RFL+	-0.252308	0.256263	0.198622	0.0347134	4.43e-05	0.00652764	0.499727	0.0006367	0.0243279	ILMN_2638875
465	NDUFA10	R1ML0 RFL+	R2ML0 RFL+	-0.196955	0.0809737	0.245131	0.0844661	0.313037	0.00465333	0.614388	0.506485	0.0184134	ILMN_2657946
466	GOT2	R1ML0 RFL+	R2ML0 RFL+	-0.182925	0.102623	0.277104	0.016615	0.178782	0.00034542	0.407401	0.356082	0.00214195	ILMN_2593496
467	PLEKHA8	R1ML0 RFL+	R2ML0 RFL+	-0.123789	0.167211	0.328545	0.333108	0.285507	0.00777152	0.811656	0.478271	0.0280379	ILMN_2735276
468	UQCR	R1ML0 RFL+	R2ML0 RFL+	-0.17282	0.0223947	0.185836	0.0360834	0.760588	0.00889281	0.504481	0.866651	0.031244	ILMN_2871881	Mus musculus ubiquinol-cytochrome c reductase (6.4kD) subunit (Uqcr), mRNA.
469	CLEC11A	R1ML0 RFL+	R2ML+ RFL+	-0.0641579	0.250842	0.220238	0.471973	0.00099629	0.00237704	0.874112	0.00822773	0.0105377	ILMN_2718204
470	2410001C21RIK	R1ML0 RFL+	R2ML0 RFL+	-0.173293	0.0219211	0.544131	0.197588	0.839983	0.000251	0.722436	0.914388	0.00163291	ILMN_2596259	Mus musculus RIKEN cDNA 2410001C21 gene (2410001C21Rik), mRNA.
471	DECR1	R1ML0 RFL+	R2ML0 RFL+	-0.179376	0.296386	0.960881	0.393915	0.103177	0.00024574	0.843777	0.247673	0.00160559	ILMN_1235374	Mus musculus 2,4-dienoyl CoA reductase 1, mitochondrial (Decr1), mRNA.
472	ACADL	R1ML0 RFL+	R2ML0 RFL+	-0.134602	0.160684	0.488443	0.235745	0.213422	0.00468731	0.753686	0.398262	0.018525	ILMN_2783519	Mus musculus acyl-Coenzyme A dehydrogenase, long-chain (Acadl), mRNA.
473	CRAT	R1ML0 RFL+	R2ML0 RFL+	-0.246526	0.12764	0.904902	0.176859	0.380533	4.04e-06	0.708235	0.57218	5.259e-05	ILMN_2679456
474	CRAT	R1ML0 RFL+	R2ML0 RFL+	-0.177639	0.129123	0.290509	0.0464909	0.16508	0.00068682	0.539852	0.338499	0.00377121	ILMN_1220786
475	ACOT8	R1ML0 RFL+	R2ML0 RFL+	-0.32109	0.0022193	0.514938	0.0499915	0.986033	0.00126606	0.547681	0.992638	0.00625892	ILMN_2983587	Mus musculus acyl-CoA thioesterase 8 (Acot8), mRNA.
476	ACOT8	R1ML0 RFL+	R2ML0 RFL+	-0.272729	0.0228421	0.42431	0.0167186	0.797661	0.00045005	0.408771	0.89046	0.00267215	ILMN_2738629	Mus musculus acyl-CoA thioesterase 8 (Acot8), mRNA.
477	MGLL	R1ML0 RFL+	R2ML0 RFL+	-0.188714	0.293667	0.974185	0.435229	0.172992	0.00017319	0.860009	0.349261	0.0012012	ILMN_2857957	Mus musculus monoglyceride lipase (Mgll), mRNA.
478	MGLL	R1ML0 RFL+	R2ML0 RFL+	-0.414895	-0.0540614	0.713705	0.120011	0.796293	0.00194556	0.661127	0.889647	0.00893887	ILMN_2592925	Mus musculus monoglyceride lipase (Mgll), mRNA.
479	HSD17B4	R1ML0 RFL+	R2ML0 RFL+	-0.214617	0.152526	0.381182	0.103378	0.227971	0.00143216	0.643734	0.415188	0.00693333	ILMN_2912239	Mus musculus hydroxysteroid (17-beta) dehydrogenase 4 (Hsd17b4), mRNA.
480	TMEM134	R1ML0 RFL+	R2ML0 RFL+	-0.16985	0.106412	0.459068	0.197065	0.327412	0.00011762	0.722436	0.521218	0.00087505	ILMN_2773422
481	BC011248	R1ML0 RFL+	R2ML0 RFL+	-0.141346	0.122868	0.315589	0.0617286	0.0249181	8.8e-06	0.574746	0.090697	0.00010035	ILMN_1232115	Mus musculus cDNA sequence BC011248 (BC011248), mRNA.
482	GPD1	R1ML0 RFL+	R2ML0 RFL+	-0.0776316	0.436868	0.926586	0.733238	0.0353106	1.77e-06	0.944367	0.117381	2.676e-05	ILMN_2808811	Mus musculus glycerol-3-phosphate dehydrogenase 1 (soluble) (Gpd1), mRNA.
483	RPS19	R1ML0 RFL+	R2ML0 RFL+	-0.0217744	0.224702	0.523818	0.885023	0.141451	4.33e-06	0.97814	0.306042	5.577e-05	ILMN_2754355
484	SLC25A10	R1ML0 RFL+	R2ML0 RFL+	-0.154827	0.202149	0.965286	0.531059	0.292533	4e-06	0.893235	0.484951	5.227e-05	ILMN_2730797
485	FVT1	R1ML0 RFL+	R2ML0 RFL+	-0.203602	0.219851	0.398071	0.0806191	0.071348	8.415e-05	0.609014	0.192244	0.00065647	ILMN_2832608	Mus musculus follicular lymphoma variant translocation 1 (Fvt1), mRNA. XM_921793 XM_985103
486	GUK1	R1ML0 RFL+	R2ML0 RFL+	-0.208767	0.130114	0.37169	0.0262034	0.290772	7.239e-05	0.46663	0.483452	0.00058002	ILMN_2967576	Mus musculus guanylate kinase 1 (Guk1), mRNA.
487	AK2	R1ML0 RFL+	R2ML0 RFL+	-0.342075	-0.208123	0.541289	0.00087296	0.0769543	0.00042752	0.16374	0.202861	0.00255848	ILMN_2660663
488	TOR1A	R1ML0 RFL+	R2ML0 RFL+	-0.209195	0.0974474	0.406875	0.0817787	0.197212	1.98e-06	0.610833	0.378929	2.935e-05	ILMN_2631144	Mus musculus torsin family 1, member A (torsin A) (Tor1a), mRNA.
489	TOR1A	R1ML0 RFL+	R2ML0 RFL+	-0.0713008	0.0661754	0.34314	0.432771	0.357341	0.00012221	0.859575	0.550284	0.00090293	ILMN_1258334	Mus musculus torsin family 1, member A (torsin A) (Tor1a), mRNA.
490	ABCD3	R1ML0 RFL+	R2ML0 RFL+	-0.037594	0.367596	0.497104	0.782712	0.0463986	0.00109186	0.956003	0.142207	0.00554167	ILMN_2925281	Mus musculus ATP-binding cassette, sub-family D (ALD), member 3 (Abcd3), mRNA.
491	KIF1B	R1ML0 RFL+	R2ML+ RFL+	0.0556842	0.536684	0.632923	0.723617	0.0034711	6.86e-06	0.942708	0.0213237	8.173e-05	ILMN_3034877	Mus musculus kinesin family member 1B (Kif1b), transcript variant 1, mRNA.
492	ORAOV1	R1ML0 RFL+	R2ML0 RFL+	-0.233805	0.145386	0.392229	0.0123635	0.0356581	6.727e-05	0.380195	0.118233	0.00054442	ILMN_2882820	Mus musculus oral cancer overexpressed 1 (Oraov1), mRNA.
493	SAS	R1ML0 RFL+	R2ML0 RFL+	-0.17582	0.161395	0.272223	0.0174284	0.0237091	0.015802	0.413459	0.0874497	0.0493636	ILMN_2757599
494	2410002F23RIK	R1ML0 RFL0	R2ML+ RFL0	-0.0698947	0.333605	0.215393	0.582886	0.00011287	0.035965	0.906954	0.00140733	0.0936597	ILMN_2629648	Mus musculus RIKEN cDNA 2410002F23 gene (2410002F23Rik), mRNA.
495	ETFA	R1ML0 RFL+	R2ML+ RFL+	-0.252173	0.309351	0.314202	0.0556711	0.00378895	0.0018945	0.561969	0.0228609	0.00873778	ILMN_2649966	Mus musculus electron transferring flavoprotein, alpha polypeptide (Etfa), nuclear gene encoding mitochondrial protein, mRNA.
496	HSD17B11	R1ML0 RFL+	R2ML0 RFL+	-0.428662	0.264386	0.567949	0.0971918	0.149764	0.00421538	0.635991	0.317821	0.0169625	ILMN_2705361
497	APOC1	R1ML0 RFL+	R2ML0 RFL+	-0.165083	0.0901316	0.226774	0.197629	0.20029	0.0154431	0.722436	0.383007	0.0484011	ILMN_1228469	Mus musculus apolipoprotein C-I (Apoc1), mRNA.
498	DDAH1	R1ML0 RFL+	R2ML0 RFL+	-0.614827	0.473982	0.788384	0.203718	0.0190065	0.0015424	0.725464	0.0744639	0.00736711	ILMN_1256676
499	GSTT2	R1ML0 RFL+	R2ML0 RFL+	-0.284241	0.0241404	0.752223	0.376314	0.909814	0.00648003	0.835542	0.952748	0.0242031	ILMN_2689880	Mus musculus glutathione S-transferase, theta 2 (Gstt2), mRNA.
500	APTX	R1ML0 RFL+	R2ML0 RFL+	-0.0799774	0.14857	0.251851	0.362503	0.0503282	0.00522164	0.826753	0.150364	0.0201897	ILMN_3037920	Mus musculus aprataxin (Aptx), transcript variant 1, mRNA.
501	ATL3	R1ML0 RFL+	R2ML0 RFL+	-0.0106316	0.145035	0.335182	0.846797	0.120889	0.00057186	0.969603	0.275447	0.00324326	ILMN_2671829	Mus musculus RIKEN cDNA 5730596K20 gene (5730596K20Rik), mRNA.
502	ATP5F1	R1ML0 RFL+	R2ML0 RFL+	-0.235842	0.145825	0.381366	0.0744664	0.106221	0.00067152	0.596034	0.252518	0.00371018	ILMN_2790486	Mus musculus ATP synthase, H+ transporting, mitochondrial F0 complex, subunit b, isoform 1 (Atp5f1), mRNA.
503	PTS	R1ML0 RFL+	R2ML0 RFL+	-0.0786992	0.221658	0.465759	0.519218	0.034016	3.196e-05	0.891725	0.114113	0.00029272	ILMN_1217378	Mus musculus 6-pyruvoyl-tetrahydropterin synthase (Pts), mRNA.
504	NDUFB6	R1ML0 RFL+	R2ML0 RFL+	-0.200782	0.142289	0.273676	0.042336	0.0769351	6.326e-05	0.530026	0.202832	0.00051708	ILMN_1242233
505	LOC100045697	R1ML0 RFL+	R2ML0 RFL+	-0.113444	0.116175	0.259092	0.273439	0.0489242	0.00146112	0.778049	0.147421	0.00704375	ILMN_1255772
506	CYP2D26	R1ML0 RFL+	R2ML0 RFL+	-0.224902	0.083193	0.496979	0.246816	0.387865	0.0006553	0.761224	0.578769	0.0036425	ILMN_2642975	Mus musculus cytochrome P450, family 2, subfamily d, polypeptide 26 (Cyp2d26), mRNA.
507	CYP2D26	R1ML0 RFL+	R2ML0 RFL+	-0.127233	0.136886	0.497363	0.517018	0.133879	0.00072158	0.891227	0.295001	0.00391935	ILMN_1227936	Mus musculus cytochrome P450, family 2, subfamily d, polypeptide 26 (Cyp2d26), mRNA.
508	RNF167	R1ML0 RFL+	R2ML0 RFL+	-0.0617068	0.160079	0.390705	0.620967	0.0491626	0.00031066	0.917983	0.148	0.00195554	ILMN_2687744	Mus musculus ring finger protein 167 (Rnf167), mRNA.
509	RNF167	R1ML0 RFL+	R2ML+ RFL+	-0.0886165	0.211026	0.343536	0.511544	0.00034512	0.0013944	0.889577	0.00350395	0.00677311	ILMN_1229534	Mus musculus ring finger protein 167 (Rnf167), mRNA.
510	SUCLG2	R1ML0 RFL+	R2ML0 RFL+	-0.231406	-0.0115965	0.452833	0.158667	0.899851	0.00052742	0.695896	0.94745	0.00303814	ILMN_3046836	Mus musculus succinate-Coenzyme A ligase, GDP-forming, beta subunit (Suclg2), mRNA.
511	2610024G14RIK	R1ML0 RFL+	R2ML+ RFL+	-0.119165	0.328596	0.194964	0.169658	0.00164264	0.00982248	0.702248	0.0121681	0.0338223	ILMN_2835461	Mus musculus RIKEN cDNA 2610024G14 gene (2610024G14Rik), mRNA.
512	3110001A13RIK	R1ML0 RFL+	R2ML+ RFL+	-0.176075	0.333211	0.528363	0.323622	0.00658152	0.00047204	0.807107	0.03441	0.00277447	ILMN_2807335	Mus musculus RIKEN cDNA 3110001A13 gene (3110001A13Rik), mRNA.
513	LRSAM1	R1ML0 RFL+	R2ML+ RFL+	-0.116165	0.324763	0.437789	0.374554	0.0033343	0.00102737	0.834505	0.020681	0.00526953	ILMN_2761459	Mus musculus leucine rich repeat and sterile alpha motif containing 1 (Lrsam1), mRNA.
514	ZMYM3	R1ML0 RFL+	R2ML+ RFL+	0.0161729	0.414316	0.41875	0.770885	0	2.846e-05	0.953967	3e-08	0.000265	ILMN_1219447
515	TSC2	R1ML0 RFL+	R2ML0 RFL+	-0.0847444	0.169684	0.415964	0.258863	0.0644976	0.00097824	0.767952	0.178926	0.00505486	ILMN_1214823
516	TSC2	R1ML0 RFL+	R2ML+ RFL+	-0.105647	0.251377	0.453762	0.286456	0.00061954	0.00049253	0.786791	0.00560576	0.0028713	ILMN_3135566	Mus musculus tuberous sclerosis 2 (Tsc2), transcript variant 2, mRNA.
517	PARL	R1ML0 RFL+	R2ML+ RFL+	-0.244346	0.308202	0.36817	0.0789241	0.00014835	0.00219436	0.607821	0.00175995	0.00988232	ILMN_2884646	Mus musculus presenilin associated, rhomboid-like (Parl), mRNA.
518	RTN3	R1ML0 RFL+	R2ML+ RFL+	-0.112338	0.488447	0.655943	0.556574	7.03e-05	0.00010293	0.900112	0.00093898	0.00077998	ILMN_3081944	Mus musculus reticulon 3 (Rtn3), transcript variant 3, mRNA.
519	B230380D07RIK	R1ML0 RFL+	R2ML0 RFL+	-0.184173	0.204184	0.304687	0.171153	0.0252637	0.00848239	0.703154	0.0916175	0.0300527	ILMN_1214163
520	GPS2	R1ML0 RFL0	R2ML+ RFL0	-0.136053	0.333947	0.192214	0.352197	0.00151586	0.112674	0.821459	0.011494	0.220836	ILMN_2730784
521	D4WSU132E	R1ML0 RFL+	R2ML+ RFL+	-0.0175188	0.293553	0.347554	0.873338	0.0010501	0.00092604	0.975871	0.0085945	0.00482688	ILMN_1236246	Mus musculus DNA segment, Chr 4, Wayne State University 132, expressed (D4Wsu132e), mRNA.
522	SUHW4	R1ML0 RFL+	R2ML0 RFL+	-0.134669	0.43514	0.378161	0.425964	0.011664	0.0150078	0.857489	0.0521087	0.0473488	ILMN_2841334	Mus musculus suppressor of hairy wing homolog 4 (Drosophila) (Suhw4), mRNA.
523	RAB22A	R1ML0 RFL+	R2ML+ RFL+	-0.100008	0.211421	0.325732	0.296447	0.00439549	0.00170708	0.790953	0.0256511	0.00802098	ILMN_2963223	Mus musculus RAB22A, member RAS oncogene family (Rab22a), mRNA.
524	ATP5B	R1ML0 RFL+	R2ML+ RFL+	-0.209263	0.29057	0.26294	0.0361505	0.00330815	0.00259096	0.504632	0.0205355	0.0113443	ILMN_2598972	Mus musculus ATP synthase, H+ transporting mitochondrial F1 complex, beta subunit (Atp5b), nuclear gene encoding mitochondrial protein, mRNA.
525	IDH3G	R1ML0 RFL+	R2ML+ RFL+	-0.053218	0.222211	0.251467	0.378312	0.00068819	0.00070962	0.836254	0.0061245	0.00386912	ILMN_2997022	Mus musculus isocitrate dehydrogenase 3 (NAD+), gamma (Idh3g), mRNA.
526	TPRGL	R1ML0 RFL+	R2ML+ RFL+	-0.12012	0.226904	0.201393	0.124478	0.00069229	0.00115456	0.664604	0.00613864	0.00578791	ILMN_1255745	Mus musculus RIKEN cDNA 1200015A19 gene (1200015A19Rik), mRNA.
527	TCEB1	R1ML0 RFL+	R2ML+ RFL+	0.051391	0.362272	0.240357	0.449091	1.337e-05	0.00019549	0.865731	0.00023517	0.00132652	ILMN_2995698	Mus musculus transcription elongation factor B (SIII), polypeptide 1 (Tceb1), mRNA.
528	COX17	R1ML0 RFL+	R2ML0 RFL+	-0.27212	0.00923684	0.295324	0.00014202	0.894045	5.21e-06	0.0829403	0.944006	6.486e-05	ILMN_3160517	Mus musculus cytochrome c oxidase, subunit XVII assembly protein homolog (yeast) (Cox17), mRNA.
529	LOC100048483	R1ML0 RFL+	R2ML0 RFL+	-0.125398	0.0324825	0.287646	0.0790619	0.527548	0.00011005	0.607872	0.698856	0.00082642	ILMN_2598201
530	1110028A07RIK	R1ML0 RFL+	R2ML0 RFL+	-0.126932	0.350544	0.988952	0.702476	0.195414	3.165e-05	0.937643	0.376654	0.00029047	ILMN_1243516	Mus musculus RIKEN cDNA 1110028A07 gene (1110028A07Rik), mRNA.
531	CLSTN3	R1ML0 RFL+	R2ML0 RFL+	-0.376669	0.501974	0.828491	0.470853	0.253417	0.0005247	0.873605	0.444357	0.00302451	ILMN_2827217	Mus musculus calsyntenin 3 (Clstn3), mRNA.
532	PAQR7	R1ML0 RFL+	R2ML0 RFL+	-0.346684	0.163982	0.579679	0.24911	0.486516	0.00027475	0.762977	0.665637	0.00176153	ILMN_1222036	Mus musculus progestin and adipoQ receptor family member VII (Paqr7), mRNA.
533	AKR1A4	R1ML0 RFL+	R2ML0 RFL+	-0.163105	0.139061	0.553315	0.313663	0.15484	4.78e-06	0.800254	0.32489	6.041e-05	ILMN_3147135	Mus musculus aldo-keto reductase family 1, member A4 (aldehyde reductase) (Akr1a4), mRNA.
534	EPHX1	R1ML0 RFL+	R2ML0 RFL+	-0.154233	0.464553	0.812685	0.519792	0.0793705	1.725e-05	0.891725	0.206938	0.00017489	ILMN_2664224	Mus musculus epoxide hydrolase 1, microsomal (Ephx1), mRNA.
535	ENTPD5	R1ML0 RFL+	R2ML0 RFL+	-0.0442707	0.306158	0.474827	0.798449	0.10319	0.00117222	0.960209	0.247682	0.00586272	ILMN_3149143	Mus musculus ectonucleoside triphosphate diphosphohydrolase 5 (Entpd5), transcript variant 2, mRNA.
536	ENTPD5	R1ML0 RFL+	R2ML0 RFL+	-0.147887	0.232351	0.33689	0.38472	0.169366	0.0003043	0.839159	0.344483	0.00191986	ILMN_3070469	Mus musculus ectonucleoside triphosphate diphosphohydrolase 5 (Entpd5), transcript variant 2, mRNA.
537	MGST1	R1ML0 RFL+	R2ML+ RFL+	-0.0366316	0.239535	0.28353	0.762193	0.00786947	0.00288008	0.952021	0.039274	0.0123844	ILMN_2940195	Mus musculus microsomal glutathione S-transferase 1 (Mgst1), mRNA.
538	ACAA2	R1ML0 RFL+	R2ML0 RFL+	-0.188368	0.144298	0.458658	0.249638	0.174498	0.00338174	0.763163	0.350839	0.0141279	ILMN_2704823
539	ACAA2	R1ML0 RFL+	R2ML0 RFL+	-0.32394	0.0814649	0.455137	0.0932453	0.45937	0.00229545	0.629733	0.642697	0.0102425	ILMN_2704826
540	ACAA2	R1ML0 RFL+	R2ML0 RFL+	-0.246278	0.113412	0.416315	0.187633	0.324195	0.00384765	0.714652	0.51799	0.0157166	ILMN_2704822
541	AK2	R1ML0 RFL+	R2ML0 RFL+	-0.40806	-0.176965	0.44547	0.0220461	0.209684	0.00850242	0.438382	0.394316	0.0301166	ILMN_2641360
542	CRYZ	R1ML0 RFL+	R2ML0 RFL+	-0.152075	0.0728772	0.561333	0.449668	0.576437	0.00211265	0.866147	0.737417	0.00957475	ILMN_2965093	Mus musculus crystallin, zeta (Cryz), mRNA.
543	CRYZ	R1ML0 RFL+	R2ML0 RFL+	-0.203744	0.180018	0.614164	0.272843	0.17896	6.77e-06	0.7773	0.356271	8.084e-05	ILMN_2637792	Mus musculus crystallin, zeta (Cryz), mRNA.
544	DECR2	R1ML0 RFL+	R2ML0 RFL+	-0.217977	0.34207	0.793512	0.395797	0.0321261	0.00027318	0.844798	0.109511	0.0017537	ILMN_2705849
545	DECR2	R1ML0 RFL+	R2ML0 RFL+	-0.170714	0.243	0.728399	0.456358	0.0952431	0.00044303	0.8689	0.234791	0.00263592	ILMN_2705848
546	SUCLG1	R1ML0 RFL+	R2ML0 RFL+	-0.291571	0.0916667	0.570027	0.127439	0.400344	0.00081724	0.668785	0.590734	0.00434165	ILMN_1216493	Mus musculus succinate-CoA ligase, GDP-forming, alpha subunit (Suclg1), mRNA.
547	SLC2A2	R1ML0 RFL+	R2ML0 RFL+	-0.321338	0.359781	0.643384	0.236109	0.0474782	0.00384654	0.753686	0.14435	0.0157146	ILMN_2604904	Mus musculus solute carrier family 2 (facilitated glucose transporter), member 2 (Slc2a2), mRNA.
548	DHDH	R1ML0 RFL+	R2ML0 RFL+	-0.169158	-0.0629912	0.22644	0.183108	0.49791	0.00981825	0.711984	0.674902	0.0338223	ILMN_2689939	Mus musculus dihydrodiol dehydrogenase (dimeric) (Dhdh), mRNA.
549	DHDH	R1ML0 RFL+	R2ML0 RFL+	-0.134406	-0.00676316	0.241589	0.199318	0.93479	0.00634078	0.723288	0.9658	0.0237798	ILMN_2689940	Mus musculus dihydrodiol dehydrogenase (dimeric) (Dhdh), mRNA.
550	HDHD2	R1ML0 RFL+	R2ML0 RFL+	-0.0754361	0.0917544	0.25183	0.37314	0.268229	0.00015945	0.834443	0.460734	0.0011235	ILMN_3112837
551	APOC4	R1ML0 RFL+	R2ML0 RFL+	-0.226917	0.0530351	0.285295	0.000367	0.429657	0.00040525	0.129188	0.617183	0.00244509	ILMN_3009225	Mus musculus apolipoprotein C-IV (Apoc4), mRNA.
552	CPT2	R1ML0 RFL+	R2ML0 RFL+	-0.257707	-0.0850877	0.468943	0.134175	0.65378	0.0117804	0.676458	0.795013	0.0390557	ILMN_2885532	Mus musculus carnitine palmitoyltransferase 2 (Cpt2), mRNA.
553	SLC25A20	R1ML0 RFL+	R2ML0 RFL+	-0.260564	0.0584123	0.547387	0.198789	0.757515	0.00174979	0.722918	0.864612	0.00818576	ILMN_3138499	Mus musculus solute carrier family 25 (mitochondrial carnitine/acylcarnitine translocase), member 20 (Slc25a20), mRNA.
554	PEX11A	R1ML0 RFL+	R2ML0 RFL+	-0.589609	-0.169395	0.745327	0.0527019	0.551308	0.00670097	0.557088	0.71748	0.0248441	ILMN_2700265
555	PEX11A	R1ML0 RFL+	R2ML0 RFL+	-0.514105	-0.0686053	0.895914	0.131278	0.814572	0.00127365	0.673497	0.900707	0.00628555	ILMN_2960982	Mus musculus peroxisomal biogenesis factor 11a (Pex11a), mRNA.
556	SLC25A20	R1ML0 RFL+	R2ML0 RFL+	-0.291414	-0.0936754	0.580321	0.227854	0.596229	0.0005702	0.745749	0.752666	0.00323882	ILMN_3061070	Mus musculus solute carrier family 25 (mitochondrial carnitine/acylcarnitine translocase), member 20 (Slc25a20), mRNA.
557	D930001I22RIK	R1ML0 RFL+	R2ML0 RFL+	-0.283263	0.123404	0.451491	0.126471	0.582017	0.00214447	0.667182	0.74149	0.00968991	ILMN_2858399	Mus musculus RIKEN cDNA D930001I22 gene (D930001I22Rik), mRNA.
558	ACAA1B	R1ML0 RFL+	R2ML0 RFL+	-0.319887	0.507851	1.16794	0.488176	0.215694	0.0104615	0.881235	0.400918	0.0356301	ILMN_2659997
559	G0S2	R1ML0 RFL+	R2ML0 RFL+	-0.357812	0.289974	1.48209	0.467679	0.545631	0.00044254	0.873104	0.713214	0.00263363	ILMN_1257299	Mus musculus G0/G1 switch gene 2 (G0s2), mRNA.
560	SCP2	R1ML0 RFL+	R2ML0 RFL+	-0.122038	0.243605	0.272798	0.279534	0.0181259	0.00921951	0.781375	0.0719911	0.0321719	ILMN_2705886	Mus musculus sterol carrier protein 2, liver (Scp2), mRNA.
561	SCP2	R1ML0 RFL+	R2ML0 RFL+	-0.0848947	0.140105	0.308804	0.435851	0.103498	0.00242978	0.860009	0.248166	0.01073	ILMN_2705881	Mus musculus sterol carrier protein 2, liver (Scp2), mRNA.
562	SORBS1	R1ML0 RFL+	R2ML0 RFL+	-0.204135	0.244912	0.297628	0.152482	0.102213	0.00718152	0.690211	0.246187	0.026307	ILMN_3027751	Mus musculus sorbin and SH3 domain containing 1 (Sorbs1), transcript variant 5, mRNA.
563	INHBE	R1ML0 RFL+	R2ML0 RFL+	-0.358977	0.00557018	0.768571	0.0970908	0.982016	0.00063228	0.635991	0.990352	0.00352906	ILMN_1229605	Mus musculus inhibin beta E (Inhbe), mRNA.
564	DYNLRB1	R1ML0 RFL+	R2ML0 RFL+	-0.176436	0.139088	0.340455	0.194028	0.172098	0.008954	0.721451	0.34807	0.031416	ILMN_2589814
565	ACSM5	R1ML0 RFL+	R2ML0 RFL+	0.101632	0.357132	0.54861	0.51036	0.0232506	0.00550539	0.889407	0.0861653	0.0211436	ILMN_1220520
566	TCEA3	R1ML0 RFL+	R2ML0 RFL+	-0.0426015	0.365518	0.847625	0.812069	0.0192585	0.00042153	0.962335	0.0750945	0.0025267	ILMN_2907214	Mus musculus transcription elongation factor A (SII), 3 (Tcea3), mRNA.
567	HYI	R1ML0 RFL+	R2ML0 RFL+	0.00311278	0.145684	0.663848	0.986805	0.362136	0.00284993	0.99795	0.554901	0.0122836	ILMN_2691567
568	AKR1C19	R1ML0 RFL+	R2ML0 RFL+	-0.14197	0.463482	0.651804	0.62973	0.180367	0.00808445	0.921029	0.357913	0.02893	ILMN_3160292	Mus musculus aldo-keto reductase family 1, member C19 (Akr1c19), mRNA.
569	INMT	R1ML0 RFL+	R2ML0 RFL+	0.0151353	0.858921	1.09495	0.9716	0.0510685	0.00093864	0.994302	0.151887	0.00488361	ILMN_2803249	Mus musculus indolethylamine N-methyltransferase (Inmt), mRNA.
570	SORD	R1ML0 RFL+	R2ML0 RFL+	-0.0382406	0.43514	0.731214	0.874885	0.0315354	0.00094535	0.976029	0.108106	0.00491127	ILMN_2758198	Mus musculus sorbitol dehydrogenase (Sord), mRNA.
571	SOD1	R1ML0 RFL+	R2ML0 RFL+	-0.00878947	0.0103772	0.246315	0.906823	0.858409	0.00049601	0.98318	0.92477	0.00288827	ILMN_2752552	Mus musculus superoxide dismutase 1, soluble (Sod1), mRNA.
572	MRPL14	R1ML0 RFL+	R2ML0 RFL+	-0.0201654	0.289763	0.45322	0.846432	0.0182375	0.00016129	0.969603	0.0722777	0.00113272	ILMN_2734045	Mus musculus mitochondrial ribosomal protein L14 (Mrpl14), mRNA.
573	PYCRL	R1ML0 RFL+	R2ML+ RFL+	-0.135857	0.3105	0.459062	0.30489	0.00985067	7.647e-05	0.794907	0.0462681	0.00060727	ILMN_1228613
574	UGT3A1	R1ML0 RFL+	R2ML0 RFL+	-0.0562406	0.096807	0.549938	0.751023	0.640504	0.00649775	0.948495	0.78524	0.0242481	ILMN_2918732	Mus musculus UDP glycosyltransferases 3 family, polypeptide A1 (Ugt3a1), mRNA.
575	CARHSP1	R1ML0 RFL+	R2ML0 RFL+	0.0492331	0.125947	0.30639	0.513208	0.193577	0.00080948	0.890173	0.374236	0.00430802	ILMN_1225035	Mus musculus calcium regulated heat stable protein 1 (Carhsp1), mRNA.
576	CALN1	R1ML0 RFL+	R2ML0 RFL+	-0.0121579	0.271342	0.337241	0.898298	0.0359634	1.036e-05	0.981556	0.11903	0.0001146	ILMN_1249022
577	GLO1	R1ML0 RFL+	R2ML0 RFL+	-0.0116541	0.372632	0.299824	0.90898	0.0318232	0.00094925	0.98318	0.108875	0.00492986	ILMN_2667352	Mus musculus glyoxalase 1 (Glo1), mRNA.
578	PLEKHB1	R1ML0 RFL+	R2ML0 RFL+	0.175586	0.383658	0.62758	0.192214	0.0263326	0.00051855	0.719117	0.0944673	0.00299308	ILMN_2933022	Mus musculus pleckstrin homology domain containing, family B (evectins) member 1 (Plekhb1), mRNA.
579	CYP4V3	R1ML0 RFL0	R2ML+ RFL0	-0.0776541	0.521132	0.129426	0.601987	0.0072553	0.3583	0.911779	0.0370287	0.510549	ILMN_1251504
580	2410001C21RIK	R1ML0 RFL+	R2ML0 RFL+	-0.0320977	0.022807	0.471086	0.740545	0.806929	2.82e-06	0.946455	0.896095	3.885e-05	ILMN_2845974	Mus musculus RIKEN cDNA 2410001C21 gene (2410001C21Rik), mRNA.
581	ADCY6	R1ML0 RFL+	R2ML0 RFL+	-0.0725714	0.127833	0.448929	0.56558	0.2501	7.6e-07	0.90235	0.440722	1.315e-05	ILMN_1249888
582	CHKB	R1ML0 RFL+	R2ML0 RFL+	-0.119459	0.158518	0.409795	0.429269	0.0538145	0.00039317	0.858074	0.157404	0.00238286	ILMN_2755021
583	ABCC3	R1ML0 RFL+	R2ML+ RFL+	0.0438271	0.348018	0.601619	0.83808	0.00492926	0.0135427	0.967246	0.027931	0.0435279	ILMN_2685157
584	RAET1B	R1ML0 RFL+	R2ML0 RFL+	0.0855038	0.318789	0.896765	0.715852	0.190169	0.00316442	0.940957	0.369754	0.0133732	ILMN_3158725	Mus musculus retinoic acid early transcript beta (Raet1b), mRNA.
585	CYR61	R1ML0 RFL+	R2ML0 RFL+	-0.153105	0.259895	0.210798	0.00274562	0.0257137	0.00127406	0.252882	0.0928301	0.00628608	ILMN_2710253	Mus musculus cysteine rich protein 61 (Cyr61), mRNA.
586	LGALS1	R1ML0 RFL+	R2ML0 RFL+	-0.207053	0.647614	0.900009	0.560954	0.108174	0.00476352	0.901436	0.25568	0.0187713	ILMN_2619107
587	2010001J22RIK	R1ML0 RFL+	R2ML0 RFL+	0.14918	0.179561	0.504199	0.450328	0.170113	0.00570997	0.8662	0.345375	0.0217958	ILMN_2759088
588	2010001J22RIK	R1ML0 RFL+	R2ML0 RFL+	0.131865	0.136579	0.351982	0.326941	0.227155	0.00154716	0.809144	0.414222	0.00738434	ILMN_1251371
589	CYP2D10	R1ML0 RFL+	R2ML0 RFL+	-0.0371128	0.0238158	0.291789	0.558133	0.822448	0.00012878	0.901007	0.905387	0.00094252	ILMN_1229535	Mus musculus cytochrome P450, family 2, subfamily d, polypeptide 10 (Cyp2d10), mRNA.
590	CYP2D22	R1ML0 RFL+	R2ML0 RFL+	-0.00457895	0.0484211	0.244107	0.95442	0.627479	0.00477847	0.990698	0.776178	0.018813	ILMN_1214498	Mus musculus cytochrome P450, family 2, subfamily d, polypeptide 22 (Cyp2d22), mRNA.
591	TPD52L1	R1ML0 RFL+	R2ML0 RFL+	-0.0120977	-0.036193	0.291807	0.899097	0.626208	0.00438206	0.98169	0.775203	0.0175248	ILMN_1249224	Mus musculus tumor protein D52-like 1 (Tpd52l1), mRNA.
592	ALDH5A1	R1ML0 RFL+	R2ML0 RFL+	-0.164647	-0.0231228	0.273762	0.0885178	0.855519	0.00749093	0.622503	0.923142	0.0272242	ILMN_2664660
593	RBPMS2	R1ML0 RFL+	R2ML0 RFL+	0.0674286	0.155	0.336012	0.61469	0.324672	0.00031691	0.916621	0.518398	0.00198758	ILMN_2621012
594	HSPA9	R1ML0 RFL+	R2ML+ RFL+	-0.0508872	0.239518	0.258893	0.60342	0.00424727	0.00256909	0.912874	0.0249696	0.0112582	ILMN_1222803	Mus musculus heat shock protein 9 (Hspa9), mRNA.
595	OPTN	R1ML0 RFL+	R2ML0 RFL+	-0.142835	0.111904	0.480122	0.231457	0.187306	4.577e-05	0.748893	0.366525	0.00039392	ILMN_2676606	Mus musculus optineurin (Optn), mRNA.
596	ILVBL	R1ML0 RFL+	R2ML0 RFL+	-0.10812	0.0730702	0.270134	0.167411	0.270674	3.951e-05	0.700884	0.463238	0.0003476	ILMN_1218540	Mus musculus ilvB (bacterial acetolactate synthase)-like (Ilvbl), mRNA.
597	UPB1	R1ML0 RFL+	R2ML0 RFL+	-0.121805	0.156719	0.307348	0.0708318	0.213222	0.013761	0.590963	0.398196	0.0440864	ILMN_2516705	Mus musculus ureidopropionase, beta (Upb1), mRNA.
598	UPB1	R1ML0 RFL+	R2ML0 RFL+	-0.040406	0.137737	0.412536	0.678482	0.257377	0.00236693	0.93224	0.449125	0.0105015	ILMN_2870788	Mus musculus ureidopropionase, beta (Upb1), mRNA.
599	NFIX	R1ML0 RFL+	R2ML0 RFL+	-0.0426767	-0.0592719	0.324211	0.612407	0.602935	0.0012601	0.915848	0.757856	0.00623788	ILMN_2742599
600	1200003C05RIK	R1ML0 RFL+	R2ML0 RFL+	-0.173737	-0.0592368	0.25567	0.0099102	0.297324	0.00016628	0.35998	0.490043	0.00116109	ILMN_1223051	Mus musculus RIKEN cDNA 1200003C05 gene (1200003C05Rik), mRNA.
601	1500003O03RIK	R1ML0 RFL+	R2ML+ RFL+	-0.027	0.256	0.409515	0.883682	0.0107393	0.00076372	0.977575	0.0490872	0.00410827	ILMN_1250000
602	LOC100048622	R1ML0 RFL+	R2ML0 RFL+	-0.0335338	0.193561	0.417089	0.819064	0.0846025	6.322e-05	0.963843	0.216515	0.00051686	ILMN_1252602
603	TMED4	R1ML0 RFL+	R2ML0 RFL+	-0.147368	0.0626316	0.221964	0.088811	0.368989	0.00313442	0.623004	0.561901	0.0132672	ILMN_2698606	Mus musculus transmembrane emp24 protein transport domain containing 4 (Tmed4), mRNA.
604	TMED4	R1ML0 RFL+	R2ML+ RFL+	-0.0745789	0.282254	0.488586	0.499287	0.00156688	1.8e-07	0.885784	0.0117731	4.12e-06	ILMN_2695526	Mus musculus transmembrane emp24 protein transport domain containing 4 (Tmed4), mRNA.
605	TMED4	R1ML0 RFL+	R2ML+ RFL+	-0.12312	0.222737	0.454634	0.271607	0.00105067	1.21e-06	0.776505	0.0085945	1.947e-05	ILMN_2695528	Mus musculus transmembrane emp24 protein transport domain containing 4 (Tmed4), mRNA.
606	COQ6	R1ML0 RFL+	R2ML0 RFL+	-0.11806	0.139702	0.29147	0.145791	0.00251141	0.00013468	0.685114	0.0166932	0.00097821	ILMN_1229589	Mus musculus coenzyme Q6 homolog (yeast) (Coq6), mRNA.
607	RAB9	R1ML0 RFL+	R2ML0 RFL+	-0.0704361	0.180921	0.340262	0.350785	0.059594	1.227e-05	0.821206	0.169514	0.00013131	ILMN_1258125	Mus musculus RAB9, member RAS oncogene family (Rab9), mRNA.
608	DNAJB6	R1ML0 RFL+	R2ML0 RFL+	-0.0464586	0.238518	0.268286	0.546246	0.0263031	0.00139458	0.896559	0.0943878	0.00677311	ILMN_3107377	Mus musculus DnaJ (Hsp40) homolog, subfamily B, member 6 (Dnajb6), transcript variant 2, mRNA.
609	NACA	R1ML0 RFL+	R2ML0 RFL+	-0.113474	-0.00980702	0.243054	0.209378	0.874959	0.00233722	0.73089	0.93415	0.0103938	ILMN_2651642	Mus musculus nascent polypeptide-associated complex alpha polypeptide (Naca), mRNA.
610	CXCL12	R1ML0 RFL+	R2ML0 RFL+	-0.125023	0.227263	0.25389	0.280134	0.052469	0.00807541	0.781536	0.154692	0.0289172	ILMN_3158250	Mus musculus chemokine (C-X-C motif) ligand 12 (Cxcl12), transcript variant 3, mRNA.
611	NECAP1	R1ML0 RFL+	R2ML0 RFL+	-0.168053	0.107614	0.173024	0.0928982	0.00576302	0.00344782	0.628874	0.0313935	0.0143642	ILMN_2715304	Mus musculus NECAP endocytosis associated 1 (Necap1), mRNA.
612	TOM1	R1ML0 RFL+	R2ML0 RFL+	-0.187368	0.0834649	0.229494	0.0185948	0.0200492	1.378e-05	0.423486	0.0774628	0.00014464	ILMN_2959976	Mus musculus target of myb1 homolog (chicken) (Tom1), mRNA.
613	UGT1A6A	R1ML0 RFL+	R2ML0 RFL+	-0.0808195	0.211228	0.566193	0.594138	0.0971674	3.41e-05	0.908942	0.238073	0.00030856	ILMN_2418855	Mus musculus UDP glucuronosyltransferase 1 family, polypeptide A6A (Ugt1a6a), mRNA.
614	UGT1A6A	R1ML0 RFL+	R2ML0 RFL+	-0.165872	0.192342	0.585146	0.349259	0.06724	0.00011465	0.820147	0.184443	0.00085667	ILMN_1212835	Mus musculus UDP glucuronosyltransferase 1 family, polypeptide A6A (Ugt1a6a), mRNA.
615	PPP2R5C	R1ML0 RFL+	R2ML+ RFL+	-0.0665489	0.17807	0.263146	0.326142	0.00618094	4.21e-06	0.808419	0.03298	5.437e-05	ILMN_3121851	Mus musculus protein phosphatase 2, regulatory subunit B (B56), gamma isoform (Ppp2r5c), transcript variant 3, mRNA.
616	RBBP7	R1ML0 RFL+	R2ML+ RFL+	-0.139812	0.317807	0.517488	0.250107	0.00831138	1e-08	0.763536	0.0407902	2.9e-07	ILMN_2691187	Mus musculus retinoblastoma binding protein 7 (Rbbp7), mRNA.
617	RBBP7	R1ML0 RFL+	R2ML+ RFL+	-0.229624	0.351114	0.565768	0.146403	0.00016933	0	0.685807	0.00195737	5e-08	ILMN_2691192	Mus musculus retinoblastoma binding protein 7 (Rbbp7), mRNA.
618	RBBP7	R1ML0 RFL+	R2ML+ RFL+	-0.147015	0.439175	0.636223	0.30064	5.273e-05	0	0.793775	0.00073842	5e-08	ILMN_1219275	Mus musculus retinoblastoma binding protein 7 (Rbbp7), mRNA.
619	DDX47	R1ML0 RFL+	R2ML0 RFL+	-0.0257068	0.0770789	0.176458	0.581734	0.105679	0.00012573	0.906711	0.251776	0.00092368	ILMN_1236898	Mus musculus DEAD (Asp-Glu-Ala-Asp) box polypeptide 47 (Ddx47), mRNA.
620	DARS	R1ML0 RFL0	R2ML+ RFL0	-0.230865	0.331921	0.182985	0.0982717	0.00192661	0.0205256	0.637718	0.0137523	0.0606817	ILMN_2589477	Mus musculus aspartyl-tRNA synthetase (Dars), mRNA.
621	KAT2B	R1ML0 RFL0	R2ML+ RFL0	-0.0285489	0.250904	0.0848304	0.65635	2.422e-05	0.135595	0.927225	0.00038924	0.252657	ILMN_1215305
622	GPBP1L1	R1ML0 RFL0	R2ML+ RFL0	-0.0666316	0.294868	0.122417	0.511584	0.00050379	0.032592	0.889577	0.00474554	0.0868074	ILMN_1241795	Mus musculus GC-rich promoter binding protein 1-like 1 (Gpbp1l1), mRNA.
623	RNF4	R1ML0 RFL+	R2ML+ RFL+	0.0150526	0.238053	0.213086	0.904006	0.00152408	0.00904785	0.982378	0.0115427	0.0316804	ILMN_1240883	Mus musculus ring finger protein 4 (Rnf4), mRNA.
624	IDH3G	R1ML0 RFL+	R2ML0 RFL+	-0.0921579	0.00117544	0.210521	0.435003	0.981894	0.00822174	0.860009	0.990295	0.0292908	ILMN_1224368	Mus musculus isocitrate dehydrogenase 3 (NAD+), gamma (Idh3g), mRNA.
625	TAZ	R1ML0 RFL+	R2ML0 RFL+	0.0386917	0.0432632	0.180324	0.557033	0.435939	0.00098673	0.900297	0.622524	0.00509461	ILMN_2696855	Mus musculus tafazzin (Taz), mRNA.
626	1700034H14RIK	R1ML0 RFL+	R2ML+ RFL+	-0.0797143	0.323667	0.361494	0.516668	0.0010653	0.00015433	0.891227	0.0086795	0.00109401	ILMN_2732877	Mus musculus RIKEN cDNA 1700034H14 gene (1700034H14Rik), mRNA.
627	UQCRC2	R1ML0 RFL+	R2ML0 RFL+	-0.0446165	0.23786	0.197765	0.606552	0.0265497	0.00921524	0.914123	0.0950928	0.0321657	ILMN_2435140
628	PRDX3	R1ML0 RFL+	R2ML0 RFL+	-0.0318421	0.234491	0.213131	0.728802	0.0295032	0.0148537	0.943239	0.102921	0.0469489	ILMN_2732229
629	TBC1D7	R1ML0 RFL+	R2ML0 RFL+	-0.0979248	0.131289	0.208134	0.287304	0.0797369	0.00083284	0.787006	0.207514	0.00441067	ILMN_2757268	Mus musculus TBC1 domain family, member 7 (Tbc1d7), mRNA.
630	2010311D03RIK	R1ML0 RFL+	R2ML+ RFL+	-0.119925	0.262123	0.455375	0.321958	0.00355502	4.977e-05	0.805399	0.0216991	0.00042122	ILMN_1241035
631	MTCH2	R1ML0 RFL+	R2ML+ RFL+	0.00368421	0.405184	0.592101	0.977986	4.026e-05	8.18e-06	0.99589	0.00059167	9.468e-05	ILMN_1229238	Mus musculus mitochondrial carrier homolog 2 (C. elegans) (Mtch2), nuclear gene encoding mitochondrial protein, mRNA.
632	MSRB2	R1ML0 RFL+	R2ML0 RFL+	-0.103248	0.239561	0.401824	0.290092	0.0496547	7.95e-06	0.787522	0.148984	9.261e-05	ILMN_2699556	Mus musculus methionine sulfoxide reductase B2 (Msrb2), mRNA.
633	CRRY	R1ML0 RFL+	R2ML+ RFL+	0.0906165	0.27864	0.286655	0.262605	0.00788087	0.00019126	0.768762	0.0393003	0.00130537	ILMN_2688631
634	ERGIC3	R1ML0 RFL+	R2ML+ RFL+	-0.0840526	0.215614	0.388455	0.379295	0.00118247	4e-07	0.836717	0.00946309	7.84e-06	ILMN_2599615	Mus musculus ERGIC and golgi 3 (Ergic3), mRNA.
635	SYNJ2BP	R1ML0 RFL+	R2ML0 RFL+	-0.0867444	0.183851	0.392774	0.41667	0.0734316	0.0003366	0.852617	0.196248	0.00209228	ILMN_1252068	Mus musculus synaptojanin 2 binding protein (Synj2bp), mRNA.
636	MPV17	R1ML0 RFL+	R2ML+ RFL+	-0.088406	0.17607	0.22308	0.150113	0.00032153	0.00015352	0.687755	0.00331022	0.00108977	ILMN_2626383	Mus musculus Mpv17 transgene, kidney disease mutant (Mpv17), mRNA.
637	A2LD1	R1ML0 RFL+	R2ML+ RFL+	-0.0156241	0.312947	0.284101	0.896299	0.00177159	0.00564911	0.981191	0.0128782	0.0215891	ILMN_2925895	Mus musculus cDNA sequence BC006662 (BC006662), mRNA.
638	ATP5O	R1ML0 RFL+	R2ML0 RFL+	-0.0639624	0.0718947	0.233985	0.289913	0.317497	0.00013425	0.787522	0.511044	0.00097592	ILMN_2917540	Mus musculus ATP synthase, H+ transporting, mitochondrial F1 complex, O subunit (Atp5o), mRNA.
639	HDHD2	R1ML0 RFL+	R2ML+ RFL+	-0.0947368	0.228263	0.229283	0.312216	0.00420178	0.00144482	0.800103	0.0247645	0.00698219	ILMN_2629982
640	MRPL49	R1ML0 RFL+	R2ML0 RFL+	-0.0422932	0.0997544	0.199491	0.538429	0.186019	0.00014394	0.895515	0.36523	0.00103258	ILMN_2701363	Mus musculus mitochondrial ribosomal protein L49 (Mrpl49), mRNA.
641	CALR3	R1ML0 RFL+	R2ML0 RFL+	-0.040782	0.132623	0.154315	0.503004	0.126059	0.0033851	0.886794	0.283629	0.0141373	ILMN_2603760
642	L7RN6	R1ML0 RFL+	R2ML0 RFL+	-0.125496	0.161289	0.197807	0.120753	0.106784	0.0150289	0.661336	0.253419	0.0474036	ILMN_3162224	Mus musculus lethal, Chr 7, Rinchik 6 (l7Rn6), mRNA.
643	TMEM33	R1ML0 RFL+	R2ML0 RFL+	-0.204805	0.188386	0.215312	0.0918764	0.0548317	0.00338967	0.626901	0.159726	0.0141518	ILMN_1234558
644	IMMP2L	R1ML0 RFL+	R2ML0 RFL+	-0.124902	0.19786	0.265193	0.228845	0.193877	0.00824563	0.747315	0.374563	0.0293628	ILMN_1242333	Mus musculus IMP2 inner mitochondrial membrane peptidase-like (S. cerevisiae) (Immp2l), mRNA.
645	JAM4	R1ML0 RFL+	R2ML0 RFL+	-0.169466	0.183272	0.210027	0.055585	0.0922923	0.00769025	0.561961	0.229714	0.0277942	ILMN_2919999	Mus musculus junction adhesion molecule 4 (Jam4), mRNA.
646	CRYZL1	R1ML0 RFL0	R2ML+ RFL0	-0.172586	0.196342	0.129167	0.0386742	0.00162871	0.00046766	0.516506	0.0121067	0.00275502	ILMN_2648695	Mus musculus crystallin, zeta (quinone reductase)-like 1 (Cryzl1), mRNA.
647	PSMA7	R1ML0 RFL+	R2ML0 RFL+	-0.204729	0.0611754	0.222571	0.00139932	0.221317	0.00129048	0.197573	0.40741	0.00634985	ILMN_2793488	Mus musculus proteasome (prosome, macropain) subunit, alpha type 7 (Psma7), mRNA.
648	CTNNBL1	R1ML0 RFL+	R2ML0 RFL+	-0.15112	0.110404	0.26442	0.0555491	0.284765	3.1e-07	0.561961	0.477277	6.32e-06	ILMN_1249568	Mus musculus catenin, beta like 1 (Ctnnbl1), mRNA.
649	DARS	R1ML0 RFL+	R2ML+ RFL+	-0.286459	0.311684	0.33181	0.198543	0.00182417	0.0112223	0.722884	0.0131621	0.0376721	ILMN_3102333	Mus musculus aspartyl-tRNA synthetase (Dars), mRNA.
650	H47	R1ML0 RFL+	R2ML0 RFL+	-0.411301	0.356009	0.510586	0.140418	0.0120916	0.00128262	0.68341	0.0535073	0.00632012	ILMN_2712557
651	ENSA	R1ML0 RFL+	R2ML0 RFL+	-0.240677	0.135895	0.308839	0.0707874	0.0076228	1.51e-06	0.590945	0.0383934	2.336e-05	ILMN_3112185	Mus musculus endosulfine alpha (Ensa), transcript variant 1, mRNA.
652	GPR108	R1ML0 RFL+	R2ML+ RFL+	-0.0680977	0.359307	0.300458	0.516729	0.0077501	1.266e-05	0.891227	0.0387913	0.00013491	ILMN_2746811
653	RDM1	R1ML0 RFL+	R2ML+ RFL+	-0.0299549	0.269807	0.348033	0.732037	0.00303883	4.015e-05	0.944098	0.0192527	0.00035224	ILMN_1218934	Mus musculus RAD52 motif 1 (Rdm1), mRNA.
654	GPR108	R1ML0 RFL+	R2ML+ RFL+	-0.043609	0.243772	0.166012	0.608874	0.00581543	0.00143728	0.914686	0.0315624	0.0069503	ILMN_1228572
655	AOX3	R1ML0 RFL+	R2ML0 RFL+	-0.117128	0.555658	0.451143	0.70318	0.0396707	0.00082427	0.937643	0.127475	0.00437176	ILMN_2640097
656	BLVRB	R1ML0 RFL+	R2ML0 RFL+	-0.136519	0.254386	0.302185	0.39538	0.0432435	0.00021511	0.844798	0.135351	0.0014373	ILMN_2792868	Mus musculus biliverdin reductase B (flavin reductase (NADPH)) (Blvrb), mRNA.
657	CCDC56	R1ML0 RFL+	R2ML0 RFL+	-0.154714	0.06	0.246182	0.0048492	0.183328	2.077e-05	0.295439	0.361847	0.00020426	ILMN_2932518	Mus musculus coiled-coil domain containing 56 (Ccdc56), mRNA.
658	COX19	R1ML0 RFL+	R2ML0 RFL+	-0.205368	0.320298	0.450238	0.0986001	0.014824	2.26e-06	0.63838	0.062157	3.258e-05	ILMN_1221936	Mus musculus COX19 cytochrome c oxidase assembly homolog (S. cerevisiae) (Cox19), mRNA.
659	CRYGN	R1ML0 RFL+	R2ML0 RFL+	-0.0430827	0.255632	0.325976	0.631128	0.109797	5.8e-06	0.921891	0.258352	7.078e-05	ILMN_3029509	Mus musculus crystallin, gamma N (Crygn), mRNA.
660	CRYGN	R1ML0 RFL+	R2ML0 RFL+	-0.111286	0.263667	0.285458	0.289622	0.140555	0.00046633	0.787522	0.304591	0.00275037	ILMN_3102770	Mus musculus crystallin, gamma N (Crygn), mRNA.
661	RDH20	R1ML0 RFL+	R2ML0 RFL+	-0.256353	0.487289	0.286101	0.226897	0.0341407	0.00287566	0.744837	0.114436	0.0123716	ILMN_1215541	Mus musculus orphan short chain dehydrogenase/reductase (Sdro), mRNA.
662	CSAD	R1ML0 RFL+	R2ML0 RFL+	-0.200992	0.611746	0.561292	0.653728	0.0607376	0.00325332	0.926748	0.171615	0.0136804	ILMN_2810624	Mus musculus cysteine sulfinic acid decarboxylase (Csad), mRNA.
663	DDX47	R1ML0 RFL+	R2ML0 RFL+	-0.0447444	0.0548509	0.176759	0.51406	0.284689	0.00014762	0.890807	0.477211	0.00105462	ILMN_2705067	Mus musculus DEAD (Asp-Glu-Ala-Asp) box polypeptide 47 (Ddx47), mRNA.
664	LRRC39	R1ML0 RFL+	R2ML0 RFL+	-0.0603383	0.136281	0.159176	0.342468	0.016866	0.00427899	0.816052	0.0683154	0.0171781	ILMN_2746123	Mus musculus leucine rich repeat containing 39 (Lrrc39), transcript variant 2, mRNA.
665	TSC22D1	R1ML0 RFL+	R2ML+ RFL+	-0.374654	0.955965	0.928872	0.411404	0.00040817	4.01e-06	0.849624	0.00401378	5.236e-05	ILMN_2723108
666	ZFP288	R1ML0 RFL+	R2ML0 RFL+	-0.0825564	0.144491	0.188536	0.193948	0.0425655	0.00315894	0.721256	0.133848	0.0133578	ILMN_1259424
667	ATL3	R1ML0 RFL+	R2ML0 RFL+	-0.016406	0.100904	0.213208	0.817179	0.29912	0.0028442	0.963569	0.491935	0.012265	ILMN_2635606	Mus musculus RIKEN cDNA 5730596K20 gene (5730596K20Rik), mRNA.
668	DCUN1D4	R1ML0 RFL+	R2ML0 RFL+	-0.300241	0.14564	0.362247	0.0318671	0.332082	0.00224636	0.48787	0.525528	0.0100671	ILMN_1259737	Mus musculus DCN1, defective in cullin neddylation 1, domain containing 4 (S. cerevisiae) (Dcun1d4), mRNA.
669	TTC19	R1ML0 RFL+	R2ML0 RFL+	-0.0690677	0.0477895	0.19272	0.231642	0.357076	0.00214654	0.748893	0.55005	0.00969753	ILMN_2473858
670	LRBA	R1ML0 RFL0	R2ML+ RFL0	-0.0283008	0.185009	0.168649	0.542322	0.00686962	0.0235022	0.896036	0.0355832	0.0674412	ILMN_2659960
671	IFRG15	R1ML0 RFL0	R2ML+ RFL0	-0.0207744	0.244368	0.105789	0.575245	0.00179663	0.0562692	0.904891	0.0130234	0.131432	ILMN_2767764	Mus musculus interferon alpha responsive gene (Ifrg15), mRNA.
672	PPM1B	R1ML0 RFL+	R2ML+ RFL+	-0.0316165	0.246026	0.16294	0.552721	0.00662615	0.00475771	0.899376	0.0346082	0.01876	ILMN_2752074
673	PPM1B	R1ML0 RFL0	R2ML+ RFL0	-0.0483459	0.274202	0.121372	0.443848	0.00766697	0.0215206	0.863792	0.0385479	0.0630073	ILMN_2591381
674	2410002F23RIK	R1ML0 RFL0	R2ML+ RFL0	0.0194361	0.169912	0.151497	0.760206	0.0069643	0.0270031	0.951762	0.0359427	0.0752572	ILMN_2965641	Mus musculus RIKEN cDNA 2410002F23 gene (2410002F23Rik), mRNA.
675	SFT2D2	R1ML0 RFL0	R2ML+ RFL0	0.0138496	0.159421	0.121872	0.782583	1.27e-05	0.0340477	0.955892	0.00022484	0.0896504	ILMN_1260046
676	ARHGAP24	R1ML0 RFL0	R2ML+ RFL0	-0.0745263	0.458474	0.164381	0.618129	2.707e-05	0.154929	0.917606	0.00042493	0.278465	ILMN_2728038	Mus musculus Rho GTPase activating protein 24 (Arhgap24), transcript variant 2, mRNA.
677	CDC14B	R1ML0 RFL+	R2ML+ RFL+	0.0307068	0.379588	0.241881	0.768847	0.00049649	0.0120708	0.953226	0.00469401	0.0398233	ILMN_1244296
678	TULP2	R1ML0 RFL+	R2ML+ RFL+	0.0777895	0.274456	0.199506	0.395824	0.0081745	0.0100094	0.844798	0.0403612	0.0343407	ILMN_1256080
679	3010026O09RIK	R1ML0 RFL+	R2ML+ RFL+	0.188842	0.335842	0.351268	0.261237	0.00651547	0.00749231	0.768401	0.0341829	0.0272242	ILMN_1247302	Mus musculus RIKEN cDNA 3010026O09 gene (3010026O09Rik), mRNA.
680	TRIT1	R1ML0 RFL+	R2ML+ RFL+	0.192684	0.336184	0.210488	0.0209114	0.00906066	0.00096667	0.436271	0.0434956	0.00500311	ILMN_2920309	Mus musculus tRNA isopentenyltransferase 1 (Trit1), mRNA.
681	ENSMUSG00000053178	R1ML0 RFL+	R2ML+ RFL+	0.0628346	0.23043	0.167301	0.144374	4.62e-06	0.00302596	0.68485	9.511e-05	0.0129038	ILMN_2714874
682	MTERF	R1ML0 RFL0	R2ML+ RFL0	0.0570602	0.238132	0.126131	0.175655	2.93e-05	0.0336961	0.706276	0.00045355	0.0889826	ILMN_2624809
683	EPS8L2	R1ML0 RFL0	R2ML+ RFL0	0.00572932	0.328158	0.144717	0.914597	3.3e-07	0.0266051	0.983653	9.1e-06	0.0744497	ILMN_1223406	Mus musculus EPS8-like 2 (Eps8l2), mRNA.
684	PLEKHF1	R1ML0 RFL+	R2ML0 RFL+	-0.245113	0.103982	0.284042	0.104275	0.342381	0.00570047	0.646318	0.535837	0.0217628	ILMN_2993334	Mus musculus pleckstrin homology domain containing, family F (with FYVE domain) member 1 (Plekhf1), mRNA.
685	PLEKHF1	R1ML0 RFL+	R2ML0 RFL+	-0.118556	0.0844912	0.174426	0.185932	0.222904	0.00890829	0.711984	0.40934	0.0312898	ILMN_2644920	Mus musculus pleckstrin homology domain containing, family F (with FYVE domain) member 1 (Plekhf1), mRNA.
686	TMEM63B	R1ML0 RFL+	R2ML0 RFL+	0.0232632	-0.00123684	0.184402	0.517286	0.972827	7.22e-06	0.891227	0.985627	8.53e-05	ILMN_1220629	Mus musculus transmembrane protein 63b (Tmem63b), mRNA.
687	RBX1	R1ML0 RFL0	R2ML+ RFL0	-0.0778947	0.176105	0.153241	0.0579597	0.0065985	0.0412408	0.567645	0.0344848	0.103835	ILMN_1230583
688	TRF	R1ML0 RFL+	R2ML0 RFL+	-0.0280602	-0.00563158	0.156211	0.570502	0.896625	0.0114711	0.903165	0.945563	0.0383218	ILMN_2485323
689	0610010D20RIK	R1ML0 RFL+	R2ML0 RFL+	0.0229248	0.0277105	0.383092	0.728013	0.824256	0.00113095	0.942968	0.906553	0.00568841	ILMN_2735413	Mus musculus RIKEN cDNA 0610010D20 gene (0610010D20Rik), mRNA.
690	0610010D20RIK	R1ML0 RFL+	R2ML0 RFL+	0.028203	-0.00970175	0.384789	0.682664	0.949939	0.00137687	0.932242	0.973531	0.00670231	ILMN_2735415	Mus musculus RIKEN cDNA 0610010D20 gene (0610010D20Rik), mRNA.
691	C1RL	R1ML0 RFL+	R2ML0 RFL+	0.0918722	0.0523246	0.474045	0.104829	0.657676	1.351e-05	0.646747	0.797641	0.00014245	ILMN_1255190
692	RAB17	R1ML0 RFL+	R2ML0 RFL+	0.109977	0.13943	0.303908	0.122336	0.192604	5.545e-05	0.663774	0.373001	0.00046158	ILMN_2752489	Mus musculus RAB17, member RAS oncogene family (Rab17), mRNA.
693	RAB17	R1ML0 RFL+	R2ML0 RFL+	0.0516391	0.119544	0.353187	0.373181	0.120176	4.17e-06	0.834443	0.274357	5.393e-05	ILMN_2752490	Mus musculus RAB17, member RAS oncogene family (Rab17), mRNA.
694	RBKS	R1ML0 RFL+	R2ML0 RFL+	0.100932	0.153123	0.265943	0.144146	0.0821972	0.00048366	0.68485	0.212329	0.00282728	ILMN_2806720	Mus musculus ribokinase (Rbks), mRNA.
695	TMEM9	R1ML0 RFL+	R2ML0 RFL+	0.0699549	0.0720263	0.266946	0.335401	0.445337	0.0001813	0.812924	0.63107	0.00124968	ILMN_1235494	Mus musculus transmembrane protein 9 (Tmem9), mRNA.
696	2700062C07RIK	R1ML0 RFL+	R2ML0 RFL+	-0.0602782	0.0932456	0.227813	0.385767	0.123094	0.00079676	0.839159	0.278987	0.00424956	ILMN_2847285	Mus musculus RIKEN cDNA 2700062C07 gene (2700062C07Rik), mRNA.
697	EIF2B1	R1ML0 RFL+	R2ML0 RFL+	-0.118489	0.156535	0.33542	0.107483	0.0144031	8.63e-06	0.6492	0.0607246	9.881e-05	ILMN_1215242
698	DENND5B	R1ML0 RFL+	R2ML0 RFL+	-0.00518797	0.0698596	0.282054	0.933695	0.238688	0.00016206	0.986921	0.427625	0.00113659	ILMN_2700354	Mus musculus RIKEN cDNA D030011O10 gene (D030011O10Rik), mRNA.
699	CARKD	R1ML0 RFL+	R2ML0 RFL+	-0.0243609	0.118044	0.224318	0.567887	0.125572	0.00266245	0.90243	0.28283	0.0116079	ILMN_2746968	Mus musculus RIKEN cDNA 0710008K08 gene (0710008K08Rik), mRNA.
700	GPN3	R1ML0 RFL+	R2ML+ RFL+	-0.0344662	0.166605	0.207661	0.31988	0.00589961	0.00127362	0.803943	0.0318827	0.00628555	ILMN_2745005
701	8430419L09RIK	R1ML0 RFL+	R2ML0 RFL+	0.0219925	0.143588	0.267693	0.778532	0.175101	0.00017245	0.955462	0.351722	0.00119834	ILMN_1221940
702	RYK	R1ML0 RFL+	R2ML0 RFL+	0.0259248	0.133211	0.172289	0.637749	0.0749622	0.00320791	0.923722	0.199142	0.0135248	ILMN_3159826	Mus musculus receptor-like tyrosine kinase (Ryk), transcript variant 2, mRNA.
703	ASCC1	R1ML0 RFL+	R2ML0 RFL+	0.0253534	0.0703772	0.181741	0.627872	0.316453	0.00023635	0.920128	0.509867	0.00155415	ILMN_2859902	Mus musculus activating signal cointegrator 1 complex subunit 1 (Ascc1), mRNA.
704	KIFC2	R1ML0 RFL+	R2ML+ RFL+	0.0943083	0.17857	0.168932	0.0987874	0.00626109	0.00393873	0.638787	0.0332461	0.01603	ILMN_2695158
705	ABCF3	R1ML0 RFL+	R2ML0 RFL+	-0.0429323	0.0512105	0.236857	0.460742	0.483543	0.00018266	0.871386	0.663323	0.00125705	ILMN_2677696
706	FLAD1	R1ML0 RFL+	R2ML0 RFL+	0.0181504	0.0470789	0.272506	0.854734	0.604726	0.00023233	0.971225	0.759081	0.00153472	ILMN_2602630
707	MRPS18B	R1ML0 RFL+	R2ML0 RFL+	0.0207218	0.139246	0.383744	0.76164	0.0508654	4.4e-07	0.951799	0.151548	8.34e-06	ILMN_2865239	Mus musculus mitochondrial ribosomal protein S18B (Mrps18b), mRNA.
708	MRPS18B	R1ML0 RFL+	R2ML+ RFL+	0.00645865	0.241316	0.368402	0.93251	0.00091995	5.8e-07	0.986921	0.00772087	1.06e-05	ILMN_1226334
709	CREB3	R1ML0 RFL+	R2ML0 RFL+	-0.117406	0.137237	0.269827	0.00323461	0.0164793	0.00011	0.270026	0.0671851	0.0008263	ILMN_1216285
710	GOSR2	R1ML0 RFL+	R2ML0 RFL+	-0.0366992	0.145158	0.323568	0.599824	0.0226754	7e-08	0.910979	0.0844929	1.85e-06	ILMN_2600339	Mus musculus golgi SNAP receptor complex member 2 (Gosr2), mRNA.
711	ARAF	R1ML0 RFL+	R2ML0 RFL+	0.149549	0.14293	0.325699	0.0682294	0.0349843	3.23e-06	0.584467	0.116661	4.333e-05	ILMN_1237241	Mus musculus v-raf murine sarcoma 3611 viral oncogene homolog (Araf), mRNA.
712	DPH3	R1ML0 RFL+	R2ML0 RFL+	-0.0441654	0.0514298	0.181155	0.439847	0.314808	0.002655	0.861559	0.508174	0.0115774	ILMN_2704641
713	1110002N22RIK	R1ML0 RFL+	R2ML+ RFL+	0.0262782	0.260921	0.351179	0.752288	0.00320444	2.341e-05	0.948974	0.0200393	0.00022536	ILMN_2938179	Mus musculus RIKEN cDNA 1110002N22 gene (1110002N22Rik), mRNA.
714	GATAD1	R1ML0 RFL+	R2ML+ RFL+	0.0385338	0.271439	0.45283	0.694133	0.00229706	1e-08	0.934772	0.0156655	2.3e-07	ILMN_2982097	Mus musculus GATA zinc finger domain containing 1 (Gatad1), mRNA.
715	MTERFD2	R1ML0 RFL+	R2ML+ RFL+	0.0635865	0.268325	0.410423	0.407082	0.00017578	7.3e-06	0.848478	0.00201112	8.616e-05	ILMN_2679695	Mus musculus MTERF domain containing 2 (Mterfd2), mRNA.
716	TTC33	R1ML0 RFL+	R2ML+ RFL+	0.0185714	0.3325	0.243812	0.761213	0.00029814	9.94e-06	0.951762	0.00310721	0.000111	ILMN_2713039
717	MASP2	R1ML0 RFL+	R2ML0 RFL+	-0.00303008	0.188851	0.327488	0.961051	0.0550543	4.654e-05	0.992452	0.16011	0.00039946	ILMN_3027989	Mus musculus mannan-binding lectin serine peptidase 2 (Masp2), transcript variant 1, mRNA.
718	RARS2	R1ML0 RFL+	R2ML+ RFL+	0.0927594	0.27214	0.281265	0.304415	0.00042935	1.06e-06	0.794646	0.00418708	1.742e-05	ILMN_2857581	Mus musculus arginyl-tRNA synthetase 2, mitochondrial (putative) (Rars2), mRNA.
719	NECAP1	R1ML0 RFL+	R2ML+ RFL+	0.00490977	0.265053	0.289393	0.917918	0.00020585	4.46e-06	0.984693	0.00229089	5.723e-05	ILMN_1240590	Mus musculus NECAP endocytosis associated 1 (Necap1), mRNA.
720	TTC33	R1ML0 RFL+	R2ML+ RFL+	0.00149624	0.205877	0.172952	0.980874	0.00971136	0.00081486	0.996495	0.0457643	0.00433262	ILMN_1232922
721	CCDC58	R1ML0 RFL+	R2ML0 RFL+	-0.0567143	0.261167	0.248438	0.415623	0.034055	0.00042599	0.85197	0.114214	0.00255061	ILMN_2949122	Mus musculus coiled-coil domain containing 58 (Ccdc58), mRNA.
722	MRPS31	R1ML0 RFL+	R2ML+ RFL+	-0.0847293	0.243342	0.245798	0.185806	0.00947386	0.00068269	0.711984	0.0449281	0.00375411	ILMN_2829295	Mus musculus mitochondrial ribosomal protein S31 (Mrps31), mRNA.
723	MTHFS	R1ML0 RFL+	R2ML+ RFL+	0.0252707	0.195842	0.15236	0.656833	0.010283	0.00113848	0.92744	0.0476626	0.0057162	ILMN_2895847	Mus musculus 5, 10-methenyltetrahydrofolate synthetase (Mthfs), mRNA.
724	AI662250	R1ML0 RFL+	R2ML0 RFL+	0.0422481	0.148939	0.227574	0.553167	0.0403696	0.00036824	0.899513	0.129043	0.00225947	ILMN_2799596	Mus musculus expressed sequence AI662250 (AI662250), mRNA.
725	PCCB	R1ML0 RFL+	R2ML0 RFL+	0.115286	0.228	0.268628	0.209292	0.0257063	0.00440374	0.73089	0.0928164	0.0175965	ILMN_2875938	Mus musculus propionyl Coenzyme A carboxylase, beta polypeptide (Pccb), mRNA.
726	CUTC	R1ML0 RFL+	R2ML0 RFL+	-0.0794211	0.0947456	0.244414	0.212165	0.244815	0.0092618	0.733001	0.434943	0.0322975	ILMN_2686087	Mus musculus cutC copper transporter homolog (E.coli) (Cutc), mRNA.
727	KIF1B	R1ML0 RFL+	R2ML+ RFL+	-0.0117368	0.25393	0.236188	0.84269	0.00683604	0.0106525	0.968582	0.0354308	0.03617	ILMN_2670778
728	MRPS31	R1ML0 RFL+	R2ML0 RFL+	-0.089391	0.160061	0.245217	0.312042	0.0718213	0.00223687	0.800103	0.193094	0.0100368	ILMN_2736094	Mus musculus mitochondrial ribosomal protein S31 (Mrps31), mRNA.
729	MRPS31	R1ML0 RFL+	R2ML0 RFL+	-0.153045	0.227526	0.315982	0.0515088	0.0125953	0.00027693	0.554668	0.0550915	0.00177283	ILMN_2732565	Mus musculus mitochondrial ribosomal protein S31 (Mrps31), mRNA.
730	2210021J22RIK	R1ML0 RFL+	R2ML+ RFL+	-0.0620451	0.24936	0.240113	0.285012	0.00013062	3.843e-05	0.78482	0.00158772	0.00034032	ILMN_2781118	Mus musculus RIKEN cDNA 2210021J22 gene (2210021J22Rik), mRNA.
731	TM2D3	R1ML0 RFL+	R2ML0 RFL+	-0.0651203	0.135404	0.231125	0.0889154	0.0625171	8.972e-05	0.623087	0.175	0.00069315	ILMN_2696537	Mus musculus TM2 domain containing 3 (Tm2d3), transcript variant 2, mRNA.
732	PSMB1	R1ML0 RFL+	R2ML+ RFL+	-0.0385414	0.261649	0.260074	0.394276	8.77e-05	0.00654985	0.844127	0.00113082	0.0243894	ILMN_1239724
733	KRR1	R1ML0 RFL0	R2ML+ RFL0	-0.0133083	0.212763	0.115036	0.827626	0.00258884	0.00992989	0.965344	0.0170648	0.034118	ILMN_1258846
734	RBM10	R1ML0 RFL+	R2ML+ RFL+	-0.024218	0.171377	0.214033	0.646481	0.0044688	4.262e-05	0.926254	0.0259866	0.00037089	ILMN_2591626	Mus musculus RNA binding motif protein 10 (Rbm10), mRNA.
735	ACAP3	R1ML0 RFL0	R2ML+ RFL0	0.0512331	0.196447	0.134104	0.202027	0.0050529	0.00093031	0.725024	0.0284569	0.00484714	ILMN_2962083	Mus musculus centaurin, beta 5 (Centb5), mRNA.
736	FOXRED1	R1ML0 RFL+	R2ML+ RFL+	-0.0156692	0.24264	0.27192	0.812268	0.0062588	2.325e-05	0.962335	0.0332461	0.00022402	ILMN_2832884	Mus musculus FAD-dependent oxidoreductase domain containing 1 (Foxred1), mRNA.
737	ZFP295	R1ML0 RFL+	R2ML+ RFL+	0.0164662	0.392395	0.193211	0.701485	4e-08	0.00038067	0.93694	1.49e-06	0.00232189	ILMN_3085946	Mus musculus zinc finger protein 295 (Zfp295), transcript variant 3, mRNA.
738	RUSC1	R1ML0 RFL+	R2ML+ RFL+	-0.0501504	0.180754	0.209205	0.141884	0.00320934	1.167e-05	0.68341	0.0200512	0.00012621	ILMN_2917441	Mus musculus RUN and SH3 domain containing 1 (Rusc1), mRNA.
739	BLCAP	R1ML0 RFL+	R2ML+ RFL+	0.189481	0.432886	0.494024	0.113565	1.031e-05	0	0.656921	0.00018873	2e-08	ILMN_2705802
740	ORMDL3	R1ML0 RFL+	R2ML+ RFL+	0.0844135	0.342342	0.62881	0.520069	0.00528467	1.6e-07	0.891809	0.0293749	3.65e-06	ILMN_2712280	Mus musculus ORM1-like 3 (S. cerevisiae) (Ormdl3), mRNA.
741	UNC119B	R1ML0 RFL+	R2ML0 RFL+	0.0861128	0.244184	0.27072	0.118129	0.0136853	0	0.660066	0.0585316	4e-08	ILMN_2590771	Mus musculus expressed sequence AA407659 (AA407659), mRNA.
742	UNC119B	R1ML0 RFL+	R2ML+ RFL+	0.0844361	0.306746	0.332324	0.293828	0.00264352	7.5e-07	0.789024	0.0173425	1.305e-05	ILMN_1245813	Mus musculus expressed sequence AA407659 (AA407659), mRNA.
743	UNC119B	R1ML0 RFL+	R2ML0 RFL+	0.0427143	0.237333	0.245086	0.40442	0.0138161	2.45e-06	0.84725	0.0589369	3.469e-05	ILMN_1214441	Mus musculus expressed sequence AA407659 (AA407659), mRNA.
744	CYP11B2	R1ML0 RFL+	R2ML0 RFL+	0.0461429	0.144833	0.212667	0.183821	0.00038214	2.45e-06	0.711984	0.00379883	3.471e-05	ILMN_2748181	Mus musculus cytochrome P450, family 11, subfamily b, polypeptide 2 (Cyp11b2), mRNA.
745	VAMP1	R1ML0 RFL+	R2ML+ RFL+	0.0443534	0.164711	0.224738	0.292878	0.00696662	0	0.788485	0.0359427	8e-08	ILMN_2480543
746	DUSP10	R1ML0 RFL+	R2ML+ RFL+	-0.0552256	0.265798	0.160881	0.100064	0.0001627	0.00014961	0.640612	0.00189733	0.00106645	ILMN_2678724	Mus musculus dual specificity phosphatase 10 (Dusp10), mRNA.
747	QRICH1	R1ML0 RFL+	R2ML+ RFL+	0.0366241	0.219553	0.191723	0.321387	1.088e-05	3.024e-05	0.805253	0.00019712	0.00027901	ILMN_2902625	Mus musculus glutamine-rich 1 (Qrich1), mRNA.
748	PIGO	R1ML0 RFL+	R2ML+ RFL+	-0.00897744	0.16457	0.166327	0.804164	0.0109766	2.81e-06	0.961171	0.049932	3.882e-05	ILMN_2740372	Mus musculus phosphatidylinositol glycan anchor biosynthesis, class O (Pigo), mRNA.
749	LOC100046406	R1ML0 RFL+	R2ML+ RFL+	0.0186767	0.206605	0.233881	0.750839	0.01065	1.292e-05	0.948495	0.048847	0.00013717	ILMN_2686603	Mus musculus protein phosphatase 1, regulatory subunit 10 (Ppp1r10), mRNA.
750	LRRC3	R1ML0 RFL+	R2ML0 RFL+	-0.0483233	0.340939	0.331789	0.522388	0.0113609	2.902e-05	0.891933	0.0511909	0.0002691	ILMN_2604179	Mus musculus leucine rich repeat containing 3 (Lrrc3), mRNA.
751	ARL4A	R1ML0 RFL+	R2ML0 RFL+	-0.0364812	0.217447	0.446762	0.853287	0.099929	0.00081649	0.970973	0.242665	0.00433948	ILMN_3066763
752	TIMM9	R1ML0 RFL+	R2ML0 RFL+	-0.122962	0.107728	0.298524	0.120053	0.249022	2.16e-06	0.661127	0.43953	3.159e-05	ILMN_3116614	Mus musculus translocase of inner mitochondrial membrane 9 homolog (yeast) (Timm9), transcript variant 2, mRNA.
753	VKORC1L1	R1ML0 RFL+	R2ML0 RFL+	-0.13915	0.179588	0.358146	0.0752079	0.0855056	3.1e-07	0.598276	0.21798	6.24e-06	ILMN_3163029	Mus musculus vitamin K epoxide reductase complex, subunit 1-like 1 (Vkorc1l1), transcript variant 2, mRNA.
754	IKBKG	R1ML0 RFL+	R2ML0 RFL+	-0.0375113	0.266465	0.201393	0.722765	0.0616636	0.00068866	0.942708	0.173342	0.00377808	ILMN_2598585	Mus musculus inhibitor of kappaB kinase gamma (Ikbkg), transcript variant 2, mRNA.
755	MPRIP	R1ML0 RFL+	R2ML+ RFL+	-0.0494135	0.233991	0.167077	0.179786	3.764e-05	0.00097507	0.709492	0.00056005	0.00504155	ILMN_1254067
756	BC003885	R1ML0 RFL+	R2ML+ RFL+	0.00933083	0.315807	0.429262	0.89131	0.00092815	1e-08	0.979431	0.00777905	4.7e-07	ILMN_3006534	Mus musculus cDNA sequence BC003885 (BC003885), mRNA.
757	ZFP330	R1ML0 RFL+	R2ML+ RFL+	-0.029797	0.367298	0.391589	0.656609	0.00039843	3.1e-07	0.927335	0.00393034	6.35e-06	ILMN_2440789	Mus musculus zinc finger protein 330 (Zfp330), mRNA.
758	IGBP1	R1ML0 RFL+	R2ML+ RFL+	0.149068	0.351044	0.433012	0.00700907	3.007e-05	2e-08	0.331698	0.00046304	6.5e-07	ILMN_2652384
759	MRPL40	R1ML0 RFL+	R2ML+ RFL+	-0.0701729	0.312518	0.395616	0.346705	2.6e-07	2e-08	0.818345	7.62e-06	7e-07	ILMN_2609087	Mus musculus mitochondrial ribosomal protein L40 (Mrpl40), mRNA.
760	RABGGTB	R1ML0 RFL+	R2ML+ RFL+	0.0225113	0.358702	0.374801	0.686901	3.3e-06	5.458e-05	0.933207	7.068e-05	0.00045508	ILMN_2589819	Mus musculus RAB geranylgeranyl transferase, b subunit (Rabggtb), mRNA.
761	SBDS	R1ML0 RFL+	R2ML+ RFL+	-0.0876541	0.199132	0.345467	0.162254	0.00282846	5.806e-05	0.697979	0.0182712	0.00048051	ILMN_1245650	Mus musculus Shwachman-Bodian-Diamond syndrome homolog (human) (Sbds), mRNA.
762	RNASEH1	R1ML0 RFL+	R2ML+ RFL+	0.0342707	0.220342	0.20361	0.486455	0.00057486	8.27e-06	0.880655	0.00527447	9.539e-05	ILMN_2716585	Mus musculus ribonuclease H1 (Rnaseh1), mRNA.
763	NOC4L	R1ML0 RFL+	R2ML+ RFL+	0.0827293	0.309658	0.228315	0.0584113	0	4.9e-06	0.567645	0	6.177e-05	ILMN_2600627	Mus musculus nucleolar complex associated 4 homolog (S. cerevisiae) (Noc4l), mRNA.
764	PIAS2	R1ML0 RFL+	R2ML+ RFL+	0.0589323	0.391789	0.183122	0.383907	4e-08	1.019e-05	0.839159	1.4e-06	0.00011304	ILMN_2762745
765	PTK2	R1ML0 RFL+	R2ML+ RFL+	0.0560752	0.276289	0.204821	0.189687	1e-08	0.00012646	0.71682	4.2e-07	0.00092817	ILMN_2615901	Mus musculus PTK2 protein tyrosine kinase 2 (Ptk2), mRNA.
766	RFFL	R1ML0 RFL+	R2ML+ RFL+	-0.0118647	0.352421	0.228589	0.84381	9.82e-06	9.143e-05	0.968657	0.00018138	0.00070382	ILMN_3124547	Mus musculus ring finger and FYVE like domain containing protein (Rffl), transcript variant 1, mRNA.
767	ZDHHC16	R1ML0 RFL+	R2ML+ RFL+	0.0109173	0.288298	0.230631	0.797992	0.00369379	2.26e-06	0.960151	0.0223866	3.248e-05	ILMN_2493874
768	CPNE4	R1ML0 RFL0	R2ML+ RFL0	0.0418045	0.163114	0.107387	0.146521	0.00836187	0.00060479	0.685807	0.040991	0.0033996	ILMN_2818246	Mus musculus copine IV (Cpne4), mRNA.
769	LAPTM4A	R1ML0 RFL+	R2ML+ RFL+	0.0836842	0.477684	0.314943	0.381103	1.3e-07	1.139e-05	0.837879	4.2e-06	0.00012354	ILMN_1254173
770	NUP54	R1ML0 RFL+	R2ML+ RFL+	0.00557895	0.266912	0.220985	0.922276	4.382e-05	2.8e-07	0.985123	0.00063012	5.73e-06	ILMN_2709901
771	NUP88	R1ML0 RFL+	R2ML+ RFL+	-0.0485639	0.204079	0.168354	0.462779	0.0006909	0.00053722	0.871386	0.00613412	0.00308282	ILMN_3034381
772	ACBD6	R1ML0 RFL0	R2ML+ RFL0	0.032985	0.222675	0.147872	0.571132	0.00030101	0.00082245	0.903383	0.00313032	0.00436392	ILMN_1232903	Mus musculus acyl-Coenzyme A binding domain containing 6 (Acbd6), mRNA.
773	KCTD15	R1ML0 RFL0	R2ML+ RFL0	-0.0186241	0.224947	0.138336	0.680777	0.00566124	0.0311857	0.93224	0.030958	0.0840306	ILMN_2655869	Mus musculus potassium channel tetramerisation domain containing 15 (Kctd15), mRNA.
774	ADCK5	R1ML0 RFL+	R2ML0 RFL+	0.19882	0.406939	0.409223	0.217969	0.0360472	0.00131132	0.737781	0.119231	0.00642951	ILMN_2918317	Mus musculus aarF domain containing kinase 5 (Adck5), mRNA.
775	AGPAT6	R1ML0 RFL+	R2ML0 RFL+	-0.0245113	0.232965	0.257619	0.73096	0.0519705	0.00020218	0.943977	0.15361	0.00136399	ILMN_2918402	Mus musculus 1-acylglycerol-3-phosphate O-acyltransferase 6 (lysophosphatidic acid acyltransferase, zeta) (Agpat6), mRNA.
776	SETD6	R1ML0 RFL+	R2ML+ RFL+	0.00614286	0.171	0.163054	0.904292	0.00646426	0.00631384	0.982479	0.0339819	0.0236957	ILMN_1223358
777	100041294	R1ML0 RFL+	R2ML+ RFL+	0.0357895	0.208456	0.250387	0.406172	0.00262901	0.00017499	0.848088	0.0172738	0.00121074	ILMN_2850839	Mus musculus suppressor of Ty 4 homolog 2 (S. cerevisiae) (Supt4h2), mRNA.
778	BTF3	R1ML0 RFL+	R2ML+ RFL+	-0.0513158	0.272518	0.312512	0.335349	0.00029124	0.00015613	0.812892	0.00304972	0.00110467	ILMN_2720034
779	PSMB2	R1ML0 RFL+	R2ML+ RFL+	-0.0483609	0.170211	0.313324	0.329115	0.00713474	1.2e-06	0.810043	0.0365513	1.922e-05	ILMN_2949632	Mus musculus proteasome (prosome, macropain) subunit, beta type 2 (Psmb2), mRNA.
780	SDF2	R1ML0 RFL+	R2ML+ RFL+	0.000142857	0.2795	0.287214	0.998807	9.31e-05	3.2e-06	0.999663	0.00119083	4.301e-05	ILMN_2791326	Mus musculus stromal cell derived factor 2 (Sdf2), mRNA.
781	SDF2	R1ML0 RFL+	R2ML+ RFL+	-0.000142857	0.295667	0.399295	0.997499	7.298e-05	1.5e-07	0.999458	0.00096923	3.56e-06	ILMN_2717199	Mus musculus stromal cell derived factor 2 (Sdf2), mRNA.
782	VPS29	R1ML0 RFL+	R2ML+ RFL+	-0.0778271	0.195649	0.158628	0.238945	0.00038436	0.00648356	0.755527	0.00381348	0.0242093	ILMN_2446175	Mus musculus vacuolar protein sorting 29 (S. pombe) (Vps29), mRNA.
783	NSMCE2	R1ML0 RFL+	R2ML0 RFL+	0.00366917	0.193693	0.224854	0.938642	0.0141069	6.19e-06	0.987605	0.0597898	7.481e-05	ILMN_1255898	Mus musculus non-SMC element 2 homolog (MMS21, S. cerevisiae) (Nsmce2), mRNA.
784	ZNHIT3	R1ML0 RFL+	R2ML0 RFL+	0.0506842	0.124851	0.277509	0.28302	0.0259634	2.351e-05	0.783096	0.0935609	0.00022615	ILMN_2914957	Mus musculus zinc finger, HIT type 3 (Znhit3), mRNA.
785	GEMIN6	R1ML0 RFL+	R2ML+ RFL+	0.011	0.388333	0.205798	0.863487	4.4e-07	2.064e-05	0.973639	1.173e-05	0.00020332	ILMN_2631813	Mus musculus gem (nuclear organelle) associated protein 6 (Gemin6), mRNA.
786	GEMIN6	R1ML0 RFL+	R2ML+ RFL+	-0.0159023	0.316026	0.215286	0.761051	9.699e-05	2.07e-06	0.951762	0.00123257	3.042e-05	ILMN_1214319	Mus musculus gem (nuclear organelle) associated protein 6 (Gemin6), mRNA.
787	RPL36AL	R1ML0 RFL+	R2ML+ RFL+	0.0731053	0.382272	0.213574	0.0908826	5.166e-05	5.9e-05	0.625011	0.00072698	0.00048717	ILMN_2967528	Mus musculus ribosomal protein L36a-like (Rpl36al), mRNA.
788	1190017O12RIK	R1ML0 RFL+	R2ML+ RFL+	0.177624	0.593719	0.541092	0.0288547	1.997e-05	1e-08	0.477981	0.00032878	4.2e-07	ILMN_2795854	Mus musculus RIKEN cDNA 1190017O12 gene (1190017O12Rik), mRNA.
789	NEDD8	R1ML0 RFL+	R2ML+ RFL+	0.0199023	0.347307	0.399277	0.721174	0.00024544	1e-08	0.942438	0.00264782	4e-07	ILMN_1256971
790	FAM114A2	R1ML0 RFL+	R2ML+ RFL+	0.0762556	0.281684	0.346723	0.112705	1.03e-06	1e-08	0.656141	2.512e-05	3.2e-07	ILMN_1232976	Mus musculus RIKEN cDNA 1810073G14 gene (1810073G14Rik), mRNA.
791	STX8	R1ML0 RFL+	R2ML+ RFL+	0.109113	0.359351	0.315336	0.0718516	0.00223572	4.31e-06	0.592534	0.0153654	5.555e-05	ILMN_3141830
792	D10ERTD322E	R1ML0 RFL+	R2ML+ RFL+	0.0760075	0.430746	0.302339	0.209935	2e-08	5.824e-05	0.73089	7e-07	0.0004817	ILMN_2727992	Mus musculus DNA segment, Chr 10, ERATO Doi 322, expressed (D10Ertd322e), mRNA.
793	RPS27A	R1ML0 RFL+	R2ML+ RFL+	0.0826617	0.381947	0.317896	0.127078	2.5e-07	8.67e-06	0.668216	7.42e-06	9.913e-05	ILMN_3046846	Mus musculus ribosomal protein S27a (Rps27a), transcript variant 2, mRNA.
794	1810009A15RIK	R1ML0 RFL+	R2ML+ RFL+	0.0231805	0.278895	0.392158	0.723083	3.31e-05	1.8e-07	0.942708	0.00050296	4e-06	ILMN_1221262	Mus musculus RIKEN cDNA 1810009A15 gene (1810009A15Rik), mRNA.
795	RAI12	R1ML0 RFL+	R2ML+ RFL+	0.0521203	0.22943	0.309557	0.272687	1.138e-05	2.1e-07	0.777044	0.0002048	4.65e-06	ILMN_2891573	Mus musculus retinoic acid induced 12 (Rai12), mRNA.
796	CHMP2A	R1ML0 RFL+	R2ML+ RFL+	0.114256	0.361684	0.462818	0.101104	4.093e-05	7e-08	0.641205	0.00059879	1.87e-06	ILMN_2694998	Mus musculus chromatin modifying protein 2A (Chmp2a), mRNA.
797	PSME2	R1ML0 RFL+	R2ML+ RFL+	0.150436	0.309912	0.471997	0.0354561	1.42e-06	1.06e-06	0.502823	3.343e-05	1.742e-05	ILMN_2731057
798	SSR2	R1ML0 RFL+	R2ML+ RFL+	0.081812	0.255193	0.383783	0.203333	0.00852152	1.345e-05	0.725163	0.0415833	0.00014196	ILMN_2833606	Mus musculus signal sequence receptor, beta (Ssr2), mRNA.
799	CHURC1	R1ML0 RFL+	R2ML0 RFL+	0.212278	0.147754	0.37658	0.00612211	0.234401	5.38e-06	0.31985	0.422832	6.668e-05	ILMN_2797689	Mus musculus churchill domain containing 1 (Churc1), mRNA. XM_989232
800	PRPF19	R1ML0 RFL+	R2ML+ RFL+	0.179962	0.502105	0.623435	0.0271746	3.013e-05	0	0.467587	0.00046364	0	ILMN_2934534	Mus musculus PRP19/PSO4 pre-mRNA processing factor 19 homolog (S. cerevisiae) (Prpf19), mRNA.
801	PRPF19	R1ML0 RFL+	R2ML0 RFL+	0.104519	0.247781	0.525399	0.159271	0.0128015	0	0.696027	0.0558031	1.8e-07	ILMN_2934532	Mus musculus PRP19/PSO4 pre-mRNA processing factor 19 homolog (S. cerevisiae) (Prpf19), mRNA.
802	YAP1	R1ML0 RFL+	R2ML+ RFL+	0.132308	0.36057	0.34922	0.0538931	6.37e-06	5.4e-07	0.558424	0.00012592	9.98e-06	ILMN_1248293
803	2310016E02RIK	R1ML0 RFL+	R2ML+ RFL+	0.0401128	0.481018	0.303577	0.52663	0.0002192	0.0009162	0.892241	0.00241339	0.00478823	ILMN_2885293	Mus musculus RIKEN cDNA 2310016E02 gene (2310016E02Rik), mRNA.
804	UBL5	R1ML0 RFL+	R2ML+ RFL+	0.107368	0.282702	0.223452	0.0254174	0.00149029	8.611e-05	0.459965	0.0113469	0.00066928	ILMN_2469689
805	POMP	R1ML0 RFL+	R2ML0 RFL+	0.0311429	0.209	0.242342	0.435367	0.024181	0.00040129	0.860009	0.0886797	0.00242497	ILMN_2625352	Mus musculus proteasome maturation protein (Pomp), mRNA.
806	POLR2D	R1ML0 RFL+	R2ML+ RFL+	0.0459323	0.356123	0.235821	0.300834	0.00458757	3.27e-06	0.793775	0.0265152	4.385e-05	ILMN_2690306
807	POLR2D	R1ML0 RFL+	R2ML+ RFL+	0.121023	0.31557	0.224938	0.0612019	0.00036469	2.21e-06	0.572979	0.00366071	3.206e-05	ILMN_2624135
808	POLR2D	R1ML0 RFL+	R2ML+ RFL+	0.0575789	0.262412	0.280268	0.165375	0.0009395	1.4e-07	0.699794	0.00784864	3.32e-06	ILMN_2743494	Mus musculus polymerase (RNA) II (DNA directed) polypeptide D (Polr2d), transcript variant 1, mRNA.
809	PPP1R11	R1ML0 RFL+	R2ML0 RFL+	-0.0593835	0.112974	0.183292	0.139181	0.00892276	0.00015629	0.68262	0.0429539	0.00110525	ILMN_2757489
810	UTP11L	R1ML0 RFL+	R2ML+ RFL+	-0.0042406	0.31514	0.28508	0.948007	2.845e-05	6.7e-07	0.98925	0.00044304	1.199e-05	ILMN_2720334	Mus musculus UTP11-like, U3 small nucleolar ribonucleoprotein, (yeast) (Utp11l), mRNA.
811	UFC1	R1ML0 RFL+	R2ML0 RFL+	0.0190677	0.174377	0.16261	0.733471	0.0181047	0.00191146	0.944526	0.07194	0.00880247	ILMN_2744693	Mus musculus ubiquitin-fold modifier conjugating enzyme 1 (Ufc1), mRNA.
812	CRRY	R1ML0 RFL+	R2ML+ RFL+	0.0691504	0.322579	0.224449	0.354325	0.00037524	0.00166898	0.821902	0.00374759	0.00787511	ILMN_1234997
813	RFFL	R1ML0 RFL0	R2ML+ RFL0	0.0339624	0.217939	0.121443	0.329571	0.00467501	0.00362932	0.810155	0.0268781	0.0149868	ILMN_1251074	Mus musculus ring finger and FYVE like domain containing protein (Rffl), transcript variant 2, mRNA.
814	HAX1	R1ML0 RFL+	R2ML+ RFL+	0.172677	0.497439	0.197369	0.0434556	9.456e-05	0.00248896	0.532554	0.00120532	0.0109594	ILMN_2972392	Mus musculus HCLS1 associated X-1 (Hax1), mRNA.
815	NHEJ1	R1ML0 RFL0	R2ML+ RFL0	-0.00758647	0.174842	0.140557	0.871389	0.00093453	6.04e-05	0.975402	0.00781977	0.00049634	ILMN_2991107	Mus musculus nonhomologous end-joining factor 1 (Nhej1), mRNA.
816	LHX8	R1ML0 RFL+	R2ML0 RFL+	0.031015	0.0603246	0.159848	0.309117	0.499363	4.1e-07	0.797929	0.675731	7.85e-06	ILMN_2454905
817	2310008M10RIK	R1ML0 RFL0	R2ML+ RFL0	-0.0476015	0.315184	0.164393	0.655268	0.00537759	0.164178	0.926805	0.029814	0.290475	ILMN_2904961	Mus musculus RIKEN cDNA 2310008M10 gene (2310008M10Rik), mRNA.
818	LOC100046163	R1ML0 RFL+	R2ML0 RFL+	-0.119248	0.279395	0.389685	0.333443	0.0524608	1.017e-05	0.811675	0.154685	0.00011294	ILMN_2672325	Mus musculus expressed in non-metastatic cells 6, protein (Nme6), mRNA.
819	LOC100046163	R1ML0 RFL+	R2ML0 RFL+	0.000654135	0.246868	0.292786	0.994398	0.0469523	0.00037915	0.999166	0.143336	0.00231479	ILMN_2606711	Mus musculus expressed in non-metastatic cells 6, protein (Nme6), mRNA.
820	TMED3	R1ML0 RFL+	R2ML0 RFL+	-0.141887	0.266851	0.201643	0.127255	0.0348155	0.00484021	0.668372	0.116213	0.0190117	ILMN_2650532	Mus musculus transmembrane emp24 domain containing 3 (Tmed3), mRNA.
821	COPZ1	R1ML0 RFL+	R2ML+ RFL+	0.132023	0.346737	0.393464	0.0356819	0.00014658	2.07e-06	0.503142	0.00174219	3.041e-05	ILMN_2862093	Mus musculus coatomer protein complex, subunit zeta 1 (Copz1), mRNA.
822	UBE2L6	R1ML0 RFL+	R2ML0 RFL+	0.0179549	0.204193	0.380393	0.818149	0.111196	0.00213085	0.963843	0.260427	0.00963854	ILMN_2486267
823	HN1L	R1ML0 RFL+	R2ML+ RFL+	-0.0136617	0.415886	0.183914	0.835868	8.416e-05	0.00520094	0.966255	0.00109611	0.0201339	ILMN_2851251	Mus musculus hematological and neurological expressed 1-like (Hn1l), mRNA.
824	PAPSS1	R1ML0 RFL+	R2ML+ RFL+	-0.041203	0.331202	0.245994	0.491776	0.00093843	2.937e-05	0.882248	0.00784226	0.00027206	ILMN_2594477	Mus musculus 3'-phosphoadenosine 5'-phosphosulfate synthase 1 (Papss1), mRNA.
825	PAPSS1	R1ML0 RFL+	R2ML+ RFL+	-0.0699624	0.348228	0.189783	0.507958	0.0056323	0.00984156	0.888345	0.0308576	0.0338779	ILMN_2859978	Mus musculus 3'-phosphoadenosine 5'-phosphosulfate synthase 1 (Papss1), mRNA.
826	TXNDC5	R1ML0 RFL+	R2ML0 RFL+	-0.131729	0.205509	0.324036	0.241776	0.051689	0.00048231	0.758136	0.153095	0.00282062	ILMN_1250947
827	CALR	R1ML0 RFL+	R2ML0 RFL+	-0.180647	0.126044	0.266777	0.11223	0.138637	0.00750423	0.655091	0.301733	0.0272521	ILMN_2861176	Mus musculus calreticulin (Calr), mRNA.
828	PDIA4	R1ML0 RFL+	R2ML0 RFL+	0.180233	0.160447	0.25575	0.166143	0.146338	0.0105824	0.699898	0.312927	0.0359561	ILMN_1249670
829	ADH1	R1ML0 RFL+	R2ML+ RFL+	0.0531128	0.439184	0.57417	0.635813	0.00026639	0.00154373	0.923233	0.00283596	0.00737211	ILMN_2850077	Mus musculus alcohol dehydrogenase 1 (class I) (Adh1), mRNA.
830	CYB5B	R1ML0 RFL0	R2ML+ RFL0	0.130323	0.512728	0.296667	0.295126	0.003272	0.0282073	0.790068	0.0203733	0.0778069	ILMN_2720180	Mus musculus cytochrome b5 type B (Cyb5b), mRNA.
831	AQP8	R1ML0 RFL+	R2ML+ RFL+	0.449143	1.112	1.10009	0.108726	0.00016524	0.00033358	0.6492	0.00191918	0.00207506	ILMN_2756379	Mus musculus aquaporin 8 (Aqp8), mRNA.
832	AQP8	R1ML0 RFL+	R2ML+ RFL+	0.473699	1.16068	1.04388	0.0917334	0.00015019	0.00093339	0.626434	0.00177825	0.00486023	ILMN_2854157	Mus musculus aquaporin 8 (Aqp8), mRNA.
833	GSTM6	R1ML0 RFL+	R2ML+ RFL+	0.335827	0.589184	0.709131	0.0915165	0.00128837	0.00013586	0.626285	0.0101463	0.00098451	ILMN_1246321
834	GSTM6	R1ML0 RFL+	R2ML+ RFL+	0.355406	0.664096	0.846649	0.0589031	0.00041556	9.34e-06	0.568844	0.00407191	0.00010531	ILMN_2633096
835	NQO2	R1ML0 RFL+	R2ML+ RFL+	0.0652105	0.509877	0.389167	0.646508	0.00096107	0.0113005	0.926254	0.00800276	0.03788	ILMN_2968731	Mus musculus NAD(P)H dehydrogenase, quinone 2 (Nqo2), mRNA.
836	OPRS1	R1ML0 RFL+	R2ML+ RFL+	0.179902	0.392307	0.612565	0.248367	0.00099249	7.08e-06	0.761966	0.00820553	8.393e-05	ILMN_1238081	Mus musculus opioid receptor, sigma 1 (Oprs1), mRNA.
837	PALLD	R1ML0 RFL+	R2ML0 RFL+	-0.0639774	0.29707	0.55578	0.583906	0.038659	2.828e-05	0.906954	0.125274	0.00026349	ILMN_3092653	Mus musculus palladin, cytoskeletal associated protein (Palld), mRNA.
838	TMIE	R1ML0 RFL+	R2ML+ RFL+	0.198496	0.634044	0.664833	0.224164	0.00622079	0.00120137	0.74257	0.033117	0.00599334	ILMN_1218037
839	GPSN2	R1ML0 RFL+	R2ML+ RFL+	0.00383459	0.164763	0.388095	0.956196	0.00579456	8.346e-05	0.991159	0.0314872	0.00065185	ILMN_2606579	Mus musculus glycoprotein, synaptic 2 (Gpsn2), mRNA.
840	NUDT2	R1ML0 RFL+	R2ML+ RFL+	0.112271	0.319675	0.488988	0.187028	0.0035304	3.16e-06	0.713593	0.0215642	4.253e-05	ILMN_1259148
841	ZADH2	R1ML0 RFL+	R2ML+ RFL+	0.0898045	0.370447	0.297131	0.103371	0.00413631	0.00102897	0.643734	0.024453	0.00527555	ILMN_1232404	Mus musculus zinc binding alcohol dehydrogenase, domain containing 2 (Zadh2), mRNA.
842	CYB5R3	R1ML0 RFL+	R2ML0 RFL+	0.159368	0.232368	0.340318	0.141755	0.0506561	0.0129738	0.68341	0.151133	0.0420412	ILMN_2712873	Mus musculus cytochrome b5 reductase 3 (Cyb5r3), mRNA.
843	CYB5R3	R1ML0 RFL+	R2ML0 RFL+	-0.0427368	0.26593	0.538732	0.763786	0.0335321	0.00024022	0.952042	0.112947	0.00157591	ILMN_2636832	Mus musculus cytochrome b5 reductase 3 (Cyb5r3), mRNA.
844	MGC18837	R1ML0 RFL+	R2ML0 RFL+	0.0331203	-0.14357	0.334964	0.615455	0.0470604	0.0024659	0.916773	0.143513	0.010869	ILMN_2601379
845	TMEM205	R1ML0 RFL+	R2ML0 RFL+	-0.0641805	-0.0818947	0.351539	0.432734	0.248401	0.00032665	0.859575	0.438877	0.00204035	ILMN_2601378
846	NIT2	R1ML0 RFL+	R2ML0 RFL+	0.0862105	0.301044	0.442057	0.460075	0.023177	0.0137912	0.871034	0.0859729	0.0441554	ILMN_2681622	Mus musculus nitrilase family, member 2 (Nit2), mRNA.
847	PCYT2	R1ML0 RFL+	R2ML+ RFL+	0.0264286	0.194667	0.420869	0.776716	0.00682898	0.00014249	0.955462	0.0354084	0.0010242	ILMN_2939303	Mus musculus phosphate cytidylyltransferase 2, ethanolamine (Pcyt2), mRNA.
848	PCYT2	R1ML0 RFL+	R2ML0 RFL+	0.00484211	0.125675	0.392315	0.953622	0.0716053	0.00071166	0.99045	0.192648	0.00387694	ILMN_2597485	Mus musculus phosphate cytidylyltransferase 2, ethanolamine (Pcyt2), mRNA.
849	SLC22A1	R1ML0 RFL+	R2ML0 RFL+	0.19594	0.191535	0.403631	0.0413345	0.0823742	0.00171818	0.525675	0.212655	0.00807022	ILMN_1248318	Mus musculus solute carrier family 22 (organic cation transporter), member 1 (Slc22a1), mRNA.
850	CUTA	R1ML0 RFL+	R2ML+ RFL+	0.043985	0.287175	0.210042	0.471177	0.00084851	0.00331123	0.873623	0.00722707	0.0138716	ILMN_3116330	Mus musculus cutA divalent cation tolerance homolog (E. coli) (Cuta), transcript variant 1, mRNA.
851	POLD2	R1ML0 RFL+	R2ML+ RFL+	-0.0703383	0.189447	0.367631	0.437175	0.00413035	2.727e-05	0.860009	0.0244388	0.00025516	ILMN_2817892	Mus musculus polymerase (DNA directed), delta 2, regulatory subunit (Pold2), mRNA.
852	DAPK2	R1ML0 RFL+	R2ML+ RFL+	-0.209459	0.444684	0.513086	0.0794361	0.00018879	0.00064163	0.607872	0.00213813	0.0035758	ILMN_2977558	Mus musculus death-associated kinase 2 (Dapk2), mRNA.
853	GAMT	R1ML0 RFL+	R2ML0 RFL+	0.160992	0.164921	0.804256	0.198197	0.35627	0.0125713	0.722884	0.549422	0.0410163	ILMN_2815506	Mus musculus guanidinoacetate methyltransferase (Gamt), mRNA.
854	ARL6IP5	R1ML0 RFL+	R2ML0 RFL+	-0.134556	0.276658	0.402196	0.252991	0.013477	7.978e-05	0.764815	0.057787	0.00062717	ILMN_1241924
855	TMEM14C	R1ML0 RFL+	R2ML0 RFL+	-0.0702707	0.128325	0.348057	0.491709	0.136723	3.325e-05	0.882248	0.299162	0.00030214	ILMN_2472110	Mus musculus transmembrane protein 14C (Tmem14c), mRNA.
856	ENDOGL1	R1ML0 RFL+	R2ML+ RFL+	-0.0849323	0.203044	0.151461	0.0976896	0.00088792	1.517e-05	0.636171	0.00749666	0.00015736	ILMN_1259684
857	SETD8	R1ML0 RFL+	R2ML+ RFL+	-0.116203	0.373368	0.290586	0.164963	0.00245351	1.441e-05	0.699794	0.0164102	0.00015044	ILMN_3001076	Mus musculus SET domain containing (lysine methyltransferase) 8 (Setd8), mRNA.
858	GALE	R1ML0 RFL+	R2ML+ RFL+	-0.150865	0.379254	0.363875	0.209664	0.00176322	0.00210474	0.73089	0.0128319	0.00954225	ILMN_2683811
859	GCK	R1ML0 RFL+	R2ML0 RFL+	-0.15306	0.590368	0.876113	0.676688	0.0120822	0.0012973	0.93224	0.0534891	0.00637711	ILMN_2698004
860	TSSC1	R1ML0 RFL+	R2ML+ RFL+	-0.0646391	0.335956	0.241205	0.537319	0.00053241	0.00261374	0.895515	0.00496958	0.0114285	ILMN_2903639	Mus musculus tumor suppressing subtransferable candidate 1 (Tssc1), mRNA.
861	TUBB2B	R1ML0 RFL+	R2ML+ RFL+	-0.160271	0.987325	1.04299	0.695319	0.00641217	8.59e-06	0.935098	0.0338136	9.855e-05	ILMN_2588051	Mus musculus tubulin, beta 2b (Tubb2b), mRNA.
862	TUBB2C	R1ML0 RFL+	R2ML0 RFL+	-0.0522632	0.188904	0.352048	0.817482	0.132635	0.0159809	0.963572	0.293089	0.049776	ILMN_2702061	Mus musculus tubulin, beta 2c (Tubb2c), mRNA.
863	CDK2AP2	R1ML0 RFL+	R2ML0 RFL+	-0.134767	0.304614	0.501976	0.360927	0.0299767	7.55e-06	0.826188	0.10411	8.857e-05	ILMN_2627093	Mus musculus CDK2-associated protein 2 (Cdk2ap2), mRNA.
864	TRAPPC4	R1ML0 RFL+	R2ML+ RFL+	-0.186985	0.193325	0.325435	0.0438651	0.00528253	4e-08	0.533713	0.0293694	1.16e-06	ILMN_2790573	Mus musculus trafficking protein particle complex 4 (Trappc4), mRNA.
865	RPL38	R1ML0 RFL+	R2ML+ RFL+	-0.0939023	0.174193	0.219711	0.0623134	0.00770602	0.0001238	0.576174	0.0386864	0.00091288	ILMN_2594971
866	DTYMK	R1ML0 RFL+	R2ML+ RFL+	-0.0138421	0.310491	0.274152	0.851057	2.228e-05	1.955e-05	0.97059	0.00036175	0.00019429	ILMN_2971845	Mus musculus deoxythymidylate kinase (Dtymk), mRNA.
867	DCPS	R1ML0 RFL+	R2ML0 RFL+	-0.0488195	0.134228	0.192027	0.452417	0.0265666	0.00059183	0.867176	0.0951342	0.00333732	ILMN_2720770	Mus musculus decapping enzyme, scavenger (Dcps), mRNA.
868	GMPPA	R1ML0 RFL+	R2ML0 RFL+	-0.190338	0.101447	0.274554	0.00652298	0.239024	4.651e-05	0.325568	0.427997	0.00039932	ILMN_1216015
869	COMMD4	R1ML0 RFL+	R2ML0 RFL+	-0.0394737	0.14236	0.195092	0.232739	0.00203154	2.813e-05	0.749556	0.0143301	0.00026229	ILMN_2798183	Mus musculus COMM domain containing 4 (Commd4), mRNA.
870	RNF181	R1ML0 RFL+	R2ML+ RFL+	-0.106511	0.254798	0.171577	0.124205	0.00019924	0.00952514	0.6645	0.00223477	0.0330381	ILMN_2682063
871	SERF2	R1ML0 RFL+	R2ML+ RFL+	0.00487218	0.189825	0.302051	0.929955	0.0107435	0.00057391	0.98655	0.0490891	0.0032534	ILMN_1223346
872	COPS6	R1ML0 RFL+	R2ML0 RFL+	-0.0297444	0.0863509	0.291818	0.559929	0.075832	4.02e-06	0.901436	0.200768	5.236e-05	ILMN_2618793	Mus musculus COP9 (constitutive photomorphogenic) homolog, subunit 6 (Arabidopsis thaliana) (Cops6), mRNA.
873	TSR2	R1ML0 RFL+	R2ML0 RFL+	0.00117293	0.115982	0.205854	0.984723	0.00860422	2.596e-05	0.997243	0.0418438	0.00024509	ILMN_2693454	Mus musculus TSR2, 20S rRNA accumulation, homolog (S. cerevisiae) (Tsr2), mRNA.
874	LOC100044221	R1ML0 RFL+	R2ML0 RFL+	-0.0726917	0.0562368	0.251685	0.111074	0.429602	0.00050692	0.652853	0.617144	0.00294181	ILMN_1255254	Mus musculus serine incorporator 2 (Serinc2), mRNA.
875	SERINC2	R1ML0 RFL+	R2ML0 RFL+	-0.0300376	0.167439	0.362199	0.718002	0.0131742	0.00012537	0.941752	0.0569685	0.000922	ILMN_2826264	Mus musculus serine incorporator 2 (Serinc2), mRNA.
876	DCAKD	R1ML0 RFL+	R2ML0 RFL+	-0.149	0.1185	0.268997	0.0370507	0.157185	4.98e-06	0.508415	0.328229	6.267e-05	ILMN_2698843	Mus musculus dephospho-CoA kinase domain containing (Dcakd), mRNA.
877	FCGRT	R1ML0 RFL+	R2ML0 RFL+	-0.0407744	-0.0107982	0.374467	0.607518	0.88857	2.572e-05	0.914336	0.941552	0.00024315	ILMN_2917497	Mus musculus Fc receptor, IgG, alpha chain transporter (Fcgrt), mRNA.
878	INHBC	R1ML0 RFL+	R2ML0 RFL+	-0.163541	0.172482	0.462521	0.27142	0.120692	0.00032688	0.776257	0.275217	0.00204128	ILMN_2792344	Mus musculus inhibin beta-C (Inhbc), mRNA.
879	VCP	R1ML0 RFL+	R2ML0 RFL+	-0.115173	0.103684	0.237937	0.172822	0.0416805	0.00069498	0.70403	0.132067	0.00380303	ILMN_1255736	Mus musculus valosin containing protein (Vcp), mRNA.
880	LOC100047651	R1ML0 RFL+	R2ML0 RFL+	-0.163195	0.172114	0.36431	0.143536	0.0572682	0.00335434	0.68485	0.164703	0.0140301	ILMN_2445324	Mus musculus zinc finger protein, multitype 1 (Zfpm1), mRNA.
881	PMM1	R1ML0 RFL+	R2ML0 RFL+	-0.018797	0.0636316	0.163223	0.711891	0.354243	0.00775088	0.940136	0.547416	0.0279818	ILMN_2974041	Mus musculus phosphomannomutase 1 (Pmm1), mRNA.
882	PMM1	R1ML0 RFL+	R2ML0 RFL+	-0.00526316	0.0539035	0.189449	0.920896	0.507196	0.00178546	0.984927	0.682117	0.00832083	ILMN_2611027	Mus musculus phosphomannomutase 1 (Pmm1), mRNA.
883	ARL16	R1ML0 RFL+	R2ML0 RFL+	-0.0767744	0.115035	0.207988	0.0406663	0.00257902	0.00028356	0.523548	0.0170192	0.00180852	ILMN_1231868
884	LOC381629	R1ML0 RFL+	R2ML0 RFL+	-0.0301278	-0.0203421	0.196491	0.486413	0.608518	0.00232196	0.880655	0.761892	0.0103302	ILMN_1225264
885	GM136	R1ML0 RFL+	R2ML0 RFL+	-0.0444286	0.0311667	0.150899	0.0268188	0.358572	1.5e-06	0.467587	0.551616	2.329e-05	ILMN_3043567	Mus musculus gene model 136, (NCBI) (Gm136), mRNA.
886	PRPF19	R1ML0 RFL+	R2ML0 RFL+	0.0302331	0.038114	0.29753	0.607126	0.614996	0.00016365	0.914175	0.766642	0.00114555	ILMN_2934533	Mus musculus PRP19/PSO4 pre-mRNA processing factor 19 homolog (S. cerevisiae) (Prpf19), mRNA.
887	TRIP6	R1ML0 RFL+	R2ML0 RFL+	0.0274962	0.0480439	0.318938	0.617638	0.427916	1e-07	0.917539	0.615307	2.5e-06	ILMN_3009463	Mus musculus thyroid hormone receptor interactor 6 (Trip6), mRNA.
888	BC005682	R1ML0 RFL+	R2ML0 RFL+	-0.050797	0.148298	0.282863	0.692859	0.165308	0.0123948	0.934566	0.338911	0.0405846	ILMN_2685124
889	KHK	R1ML0 RFL+	R2ML0 RFL+	-0.102038	-0.166561	0.444185	0.306622	0.201278	0.00012414	0.795862	0.38424	0.00091482	ILMN_2725617
890	KHK	R1ML0 RFL+	R2ML0 RFL+	0.0781203	0.0284298	0.604952	0.520973	0.788842	3.904e-05	0.891831	0.884574	0.00034439	ILMN_2698564
891	LRRC28	R1ML0 RFL+	R2ML0 RFL+	-0.0518722	0.0695088	0.423393	0.730158	0.497901	0.00015366	0.943906	0.674902	0.0010905	ILMN_2700699	Mus musculus leucine rich repeat containing 28 (Lrrc28), mRNA.
892	NDUFA8	R1ML0 RFL+	R2ML0 RFL+	-0.11688	0.0175965	0.183586	0.0867819	0.840294	0.00561825	0.618862	0.914494	0.0215031	ILMN_2682019	Mus musculus NADH dehydrogenase (ubiquinone) 1 alpha subcomplex, 8 (Ndufa8), mRNA.
893	CYP2F2	R1ML0 RFL+	R2ML0 RFL+	-0.0678797	0.52743	0.367289	0.565101	0.0304009	0.0101018	0.902246	0.105115	0.0346134	ILMN_2702903
894	GSTM1	R1ML0 RFL0	R2ML+ RFL0	0.167173	0.372649	0.16022	0.235668	0.00953256	0.121003	0.753686	0.0451286	0.232795	ILMN_1228233
895	1810074P20RIK	R1ML0 RFL0	R2ML+ RFL0	-0.0967669	0.424781	0.121497	0.33067	0.0027888	0.0716651	0.810571	0.0180919	0.157319	ILMN_1238246	Mus musculus RIKEN cDNA 1810074P20 gene (1810074P20Rik), mRNA.
896	TFG	R1ML0 RFL+	R2ML+ RFL+	-0.178549	0.396904	0.282143	0.074056	0.00288536	4.68e-06	0.595169	0.0185039	5.94e-05	ILMN_2976601	Mus musculus Trk-fused gene (Tfg), mRNA.
897	USO1	R1ML0 RFL+	R2ML0 RFL+	-0.117714	0.3845	0.304036	0.311412	0.0208407	3.038e-05	0.799595	0.0794811	0.00028018	ILMN_2503318	Mus musculus vesicle docking protein (Vdp), mRNA.
898	SRPRB	R1ML0 RFL+	R2ML0 RFL+	-0.137105	0.148061	0.246625	0.154289	0.0201825	0.00026542	0.691985	0.077779	0.00171243	ILMN_1244768
899	D3UCLA1	R1ML0 RFL0	R2ML+ RFL0	-0.260842	0.538825	0.17639	0.135492	0.00896624	0.0659714	0.67791	0.043139	0.147865	ILMN_2805945	Mus musculus DNA segment, Chr 3, University of California at Los Angeles 1 (D3Ucla1), mRNA.
900	ALG2	R1ML0 RFL+	R2ML+ RFL+	0.000842105	0.268342	0.207667	0.993672	0.00144227	0.00161649	0.999141	0.0110633	0.00766121	ILMN_2803334	Mus musculus asparagine-linked glycosylation 2 homolog (yeast, alpha-1,3-mannosyltransferase) (Alg2), mRNA.
901	TMEM39A	R1ML0 RFL0	R2ML+ RFL0	0.0387444	0.452816	0.200202	0.788927	0.00141558	0.0222044	0.958084	0.0108944	0.0645094	ILMN_2596970	Mus musculus transmembrane protein 39a (Tmem39a), mRNA.
902	PELO	R1ML0 RFL+	R2ML+ RFL+	-0.0559474	0.221719	0.249164	0.542612	0.00817528	0.00987434	0.896342	0.0403612	0.033968	ILMN_2853658	Mus musculus pelota homolog (Drosophila) (Pelo), mRNA.
903	PDCL	R1ML0 RFL0	R2ML+ RFL0	0.0442481	0.335105	0.049869	0.558927	0.00054146	0.373026	0.901433	0.00502852	0.525471	ILMN_2997256	Mus musculus phosducin-like (Pdcl), mRNA.
904	AHSA2	R1ML0 RFL+	R2ML0 RFL+	-0.0248797	0.288763	0.206277	0.711823	0.0267971	0.00016721	0.940136	0.0957594	0.00116694	ILMN_2746000
905	SRPRB	R1ML0 RFL+	R2ML0 RFL+	-0.0245338	0.211061	0.194571	0.768078	0.0685303	6.556e-05	0.952989	0.187104	0.00053281	ILMN_2744512
906	RBM15	R1ML0 RFL+	R2ML+ RFL+	-0.0122556	0.287482	0.151304	0.849284	0.00162125	0.00190907	0.97036	0.0120792	0.00879478	ILMN_2945275	Mus musculus RNA binding motif protein 15 (Rbm15), mRNA.
907	FOXA1	R1ML0 RFL+	R2ML0 RFL+	0.158902	0.826474	0.366158	0.121799	0.0186379	3.05e-06	0.662969	0.0734115	4.133e-05	ILMN_1237195
908	HEXIM1	R1ML0 RFL+	R2ML0 RFL+	0.0310526	0.361386	0.208583	0.80308	0.0182651	0.00013702	0.961171	0.0723535	0.00099239	ILMN_2631994
909	PI4KB	R1ML0 RFL+	R2ML+ RFL+	0.0539624	0.205105	0.156226	0.418567	0.00132199	8.112e-05	0.853369	0.0103503	0.00063711	ILMN_2689259	Mus musculus phosphatidylinositol 4-kinase, catalytic, beta polypeptide (Pi4kb), mRNA.
910	FUSIP1	R1ML0 RFL0	R2ML+ RFL0	-0.00639098	0.238895	0.105887	0.875341	0.00696259	0.0468021	0.976038	0.0359427	0.114486	ILMN_2698282
911	CCDC28A	R1ML0 RFL+	R2ML0 RFL+	-0.0469098	0.0884474	0.163765	0.401507	0.116726	0.00247875	0.846892	0.268935	0.0109219	ILMN_2619718
912	HIGD2A	R1ML0 RFL+	R2ML0 RFL+	-0.0469624	0.140395	0.153652	0.30459	0.00538442	4.199e-05	0.794646	0.0298454	0.0003665	ILMN_1255823	Mus musculus HIG1 domain family, member 2A (Higd2a), mRNA.
913	TCEAL8	R1ML0 RFL+	R2ML0 RFL+	-0.483391	0.109228	0.326211	0.0120967	0.683092	0.00772223	0.379532	0.815679	0.0278866	ILMN_2861493	Mus musculus transcription elongation factor A (SII)-like 8 (Tceal8), mRNA.
914	4930408O21RIK	R1ML0 RFL0	R2ML+ RFL0	0.00238346	0.22186	0.0736845	0.951513	0.00542854	0.0269531	0.990094	0.0300511	0.0752023	ILMN_3086919	Mus musculus RIKEN cDNA 4930408O21 gene (4930408O21Rik), transcript variant 1, mRNA.
915	ERCC3	R1ML0 RFL+	R2ML+ RFL+	0.0703609	0.237623	0.194202	0.0223252	1.01e-05	1.601e-05	0.440285	0.00018545	0.00016429	ILMN_1218154	Mus musculus excision repair cross-complementing rodent repair deficiency, complementation group 3 (Ercc3), mRNA.
916	HSPBAP1	R1ML0 RFL0	R2ML+ RFL0	0.011594	0.197904	0.0909048	0.88732	0.00192615	0.126406	0.978687	0.0137523	0.240192	ILMN_1243903
917	6430571L13RIK	R1ML0 RFL+	R2ML+ RFL+	-0.00890977	0.235781	0.156491	0.79929	0.00067619	0.00070876	0.960421	0.00603753	0.00386651	ILMN_1223546	Mus musculus RIKEN cDNA 6430571L13 gene (6430571L13Rik), mRNA.
918	D4ERTD22E	R1ML0 RFL+	R2ML+ RFL+	0.0146165	0.40714	0.28689	0.846629	7.22e-06	0.00013792	0.969603	0.00014034	0.00099719	ILMN_3129206	Mus musculus DNA segment, Chr 4, ERATO Doi 22, expressed (D4Ertd22e), transcript variant 1, mRNA.
919	SVIL	R1ML0 RFL0	R2ML+ RFL0	-0.0224286	0.247333	0.113554	0.495737	6.083e-05	0.00398787	0.883651	0.00082795	0.0162018	ILMN_1224247	Mus musculus supervillin (Svil), transcript variant 1, mRNA.
920	BMP4	R1ML0 RFL+	R2ML+ RFL+	-0.0612857	0.453333	0.277872	0.435022	0.00031406	2.151e-05	0.860009	0.00323725	0.00021069	ILMN_1215252
921	C1QTNF2	R1ML0 RFL+	R2ML+ RFL+	-0.0279173	0.251035	0.205351	0.582763	0.00047896	7.057e-05	0.906954	0.00456351	0.00056773	ILMN_1232458
922	LCN8	R1ML0 RFL+	R2ML0 RFL+	-0.130421	0.111912	0.170235	0.0620683	0.0292201	0.00379394	0.575535	0.102145	0.0155541	ILMN_2733045	Mus musculus lipocalin 8 (Lcn8), mRNA.
923	MGC41689	R1ML0 RFL0	R2ML+ RFL0	-0.0855714	0.2715	0.0888661	0.333788	0.00770889	0.098228	0.811675	0.0386864	0.199082	ILMN_2710159
924	WFDC1	R1ML0 RFL+	R2ML+ RFL+	0.0400752	0.309623	0.285381	0.719132	0.00351545	0.00482706	0.941895	0.0215145	0.0189781	ILMN_2466164
925	ANGPTL2	R1ML0 RFL0	R2ML+ RFL0	-0.0496241	0.200614	0.0684256	0.293177	0.00094174	0.090333	0.788795	0.0078647	0.18717	ILMN_1254653
926	HTRA1	R1ML0 RFL0	R2ML+ RFL0	-0.0532782	0.162079	0.143086	0.197236	1.816e-05	0.0109529	0.722436	0.00030397	0.0369752	ILMN_2746738	Mus musculus HtrA serine peptidase 1 (Htra1), mRNA.
927	EIF6	R1ML0 RFL+	R2ML0 RFL+	-0.174609	0.0584386	0.239277	0.152472	0.46722	0.01193	0.690211	0.649754	0.0394703	ILMN_1220294	Mus musculus integrin beta 4 binding protein (Itgb4bp), mRNA.
928	MXRA8	R1ML0 RFL0	R2ML+ RFL0	-0.146053	0.158614	0.0734732	0.0519503	0.00147739	0.073841	0.556114	0.0112688	0.161051	ILMN_2759952	Mus musculus matrix-remodelling associated 8 (Mxra8), mRNA.
929	PKIG	R1ML0 RFL0	R2ML+ RFL0	-0.25194	0.312298	0.118705	0.0302781	0.0036046	0.0951944	0.484167	0.0219471	0.19436	ILMN_2616262
930	TNXB	R1ML0 RFL+	R2ML0 RFL+	-0.114519	0.232886	0.263545	0.130242	0.0259833	4.711e-05	0.672505	0.0936164	0.00040285	ILMN_2444411	Mus musculus tenascin XB (Tnxb), mRNA.
931	WNT4	R1ML0 RFL+	R2ML0 RFL+	-0.0499474	0.025886	0.182503	0.253552	0.569193	8.271e-05	0.765071	0.731611	0.00064777	ILMN_2889641	Mus musculus wingless-related MMTV integration site 4 (Wnt4), mRNA.
932	ADAMTS1	R1ML0 RFL0	R2ML+ RFL0	0.033609	0.232728	0.0563482	0.483749	0.00131954	0.140854	0.879254	0.0103378	0.260005	ILMN_2761082
933	USP46	R1ML0 RFL0	R2ML+ RFL0	0.00459398	0.16607	0.0626935	0.923699	0.010082	0.0223298	0.985565	0.0469343	0.0647712	ILMN_2681814
934	MKKS	R1ML0 RFL0	R2ML+ RFL0	0.0457143	0.174833	0.0315625	0.204418	0.00013655	0.289915	0.726345	0.00164736	0.438453	ILMN_1246701	Mus musculus McKusick-Kaufman syndrome protein (Mkks), mRNA.
935	CCDC77	R1ML0 RFL0	R2ML+ RFL0	-0.0267444	0.159351	0.118554	0.304517	0.00912063	0.00523858	0.794646	0.0437099	0.020246	ILMN_2671436	Mus musculus coiled-coil domain containing 77 (Ccdc77), mRNA.
936	NGFB	R1ML0 RFL0	R2ML+ RFL0	0.00566165	0.189614	0.110646	0.870095	0.00023706	0.00584415	0.974934	0.00257357	0.0222188	ILMN_2660233	Mus musculus nerve growth factor, beta (Ngfb), mRNA.
937	PBX2	R1ML0 RFL0	R2ML+ RFL0	0.0293609	0.209956	0.11411	0.468035	0.00033357	0.0139962	0.873104	0.00340687	0.0447117	ILMN_1248852	Mus musculus pre B-cell leukemia transcription factor 2 (Pbx2), mRNA.
938	NR1H5	R1ML0 RFL0	R2ML+ RFL0	0.0219248	0.171544	0.0636756	0.579103	0.0063599	0.0666359	0.90612	0.0336	0.149013	ILMN_3147526	Mus musculus nuclear receptor subfamily 1, group H, member 5 (Nr1h5), transcript variant 2, mRNA.
939	REC8	R1ML0 RFL+	R2ML0 RFL+	-0.0571729	0.151518	0.159366	0.257906	0.0666829	0.0054983	0.767374	0.183307	0.0211227	ILMN_2684093	Mus musculus REC8 homolog (yeast) (Rec8), mRNA.
940	UPK3B	R1ML0 RFL+	R2ML0 RFL+	-0.0554737	0.140026	0.163982	0.425404	0.104574	0.0140499	0.857044	0.249835	0.0448554	ILMN_2941714	Mus musculus uroplakin 3B (Upk3b), mRNA.
941	0610009O20RIK	R1ML0 RFL+	R2ML+ RFL+	0.0222632	0.189596	0.463923	0.777272	0.0086862	3e-08	0.955462	0.0421008	1e-06	ILMN_1213681	Mus musculus RIKEN cDNA 0610009O20 gene (0610009O20Rik), mRNA.
942	COQ6	R1ML0 RFL+	R2ML+ RFL+	0.0502331	0.202947	0.363092	0.407658	0.00167698	3.1e-07	0.848613	0.0123654	6.31e-06	ILMN_2898403	Mus musculus coenzyme Q6 homolog (yeast) (Coq6), mRNA.
943	LOC100044159	R1ML0 RFL+	R2ML0 RFL+	-0.0082782	0.101746	0.449003	0.922006	0.122372	1.69e-06	0.985123	0.277816	2.565e-05	ILMN_2599145
944	SCRN2	R1ML0 RFL+	R2ML0 RFL+	0.096985	0.189009	0.57367	0.188681	0.12187	9.9e-07	0.715768	0.277066	1.653e-05	ILMN_2692341	Mus musculus secernin 2 (Scrn2), mRNA.
945	SERHL	R1ML0 RFL+	R2ML+ RFL+	0.124789	0.183956	0.429366	0.0707417	0.00646524	2.25e-06	0.590945	0.0339819	3.238e-05	ILMN_2647170	Mus musculus serine hydrolase-like (Serhl), mRNA.
946	ABCB6	R1ML0 RFL+	R2ML0 RFL+	0.00476692	0.186719	0.573821	0.967001	0.136379	1.52e-06	0.993384	0.298645	2.348e-05	ILMN_2833596	Mus musculus ATP-binding cassette, sub-family B (MDR/TAP), member 6 (Abcb6), mRNA.
947	COG4	R1ML0 RFL+	R2ML0 RFL+	0.0284511	0.153737	0.43992	0.700057	0.0339207	4e-08	0.936697	0.113838	1.26e-06	ILMN_1228129
948	METT11D1	R1ML0 RFL+	R2ML0 RFL+	-0.0576992	0.143325	0.457369	0.397761	0.0370579	2.7e-07	0.845152	0.121557	5.68e-06	ILMN_2856668	Mus musculus methyltransferase 11 domain containing 1 (Mett11d1), mRNA.
949	TUFM	R1ML0 RFL+	R2ML+ RFL+	-0.0356917	0.221904	0.38678	0.639708	0.00108503	2.7e-07	0.923957	0.00880671	5.62e-06	ILMN_2462448	Mus musculus Tu translation elongation factor, mitochondrial (Tufm), mRNA.
950	HDAC11	R1ML0 RFL+	R2ML+ RFL+	0.0517895	0.414456	0.590399	0.58836	0.00045656	2.307e-05	0.90798	0.00439572	0.00022272	ILMN_2614912
951	PET112L	R1ML0 RFL+	R2ML+ RFL+	0.00955639	0.427342	0.764199	0.938173	0.00252225	1.1e-07	0.987467	0.0167436	2.84e-06	ILMN_2647156	Mus musculus PET112-like (yeast) (Pet112l), mRNA.
952	PET112L	R1ML0 RFL+	R2ML+ RFL+	-0.0309699	0.295816	0.535146	0.747087	0.00173548	2.44e-06	0.947432	0.0126911	3.459e-05	ILMN_2755915	Mus musculus PET112-like (yeast) (Pet112l), mRNA.
953	PRDX6	R1ML0 RFL+	R2ML0 RFL+	0.0289173	0.218298	0.368247	0.702791	0.020612	2.18e-06	0.937643	0.0788897	3.175e-05	ILMN_2623947	Mus musculus peroxiredoxin 6 (Prdx6), mRNA.
954	SERHL	R1ML0 RFL+	R2ML+ RFL+	0.0470376	0.247061	0.463667	0.558732	5.847e-05	2e-07	0.901302	0.00080525	4.47e-06	ILMN_2647172	Mus musculus serine hydrolase-like (Serhl), mRNA.
955	HEMK1	R1ML0 RFL+	R2ML+ RFL+	-0.0592406	0.26714	0.403955	0.568113	0.00079398	1.977e-05	0.90243	0.00687427	0.00019611	ILMN_2666272	Mus musculus HemK methyltransferase family member 1 (Hemk1), mRNA.
956	ACOT7	R1ML0 RFL+	R2ML+ RFL+	-0.0565865	0.246842	0.467875	0.421649	0.00192549	2.1e-07	0.855328	0.0137519	4.67e-06	ILMN_2807084	Mus musculus acyl-CoA thioesterase 7 (Acot7), mRNA.
957	KHDRBS3	R1ML0 RFL+	R2ML+ RFL+	-0.0962406	0.228307	0.405074	0.18088	0.00224939	0.00010713	0.710631	0.0154346	0.00080758	ILMN_2590488
958	SMYD2	R1ML0 RFL+	R2ML0 RFL+	-0.0673383	0.347281	0.491878	0.587113	0.0131194	3.253e-05	0.907843	0.0568179	0.00029713	ILMN_2674001	Mus musculus SET and MYND domain containing 2 (Smyd2), mRNA.
959	SMYD2	R1ML0 RFL+	R2ML0 RFL+	-0.024203	0.215368	0.418366	0.835496	0.0435587	0.000132	0.966211	0.136122	0.00096283	ILMN_2957161	Mus musculus SET and MYND domain containing 2 (Smyd2), mRNA.
960	ACSF3	R1ML0 RFL+	R2ML0 RFL+	-0.104511	0.234798	0.390765	0.356149	0.0226083	0.0007153	0.823092	0.0843469	0.00388937	ILMN_2658654
961	MTO1	R1ML0 RFL+	R2ML0 RFL+	-0.102925	0.236123	0.337003	0.256445	0.0378281	2.09e-05	0.766893	0.123265	0.00020537	ILMN_2718612	Mus musculus mitochondrial translation optimization 1 homolog (S. cerevisiae) (Mto1), mRNA.
962	COQ5	R1ML0 RFL+	R2ML+ RFL+	-0.106586	0.259509	0.376845	0.163641	0.0082388	6.87e-06	0.699439	0.0405191	8.188e-05	ILMN_2808355	Mus musculus coenzyme Q5 homolog, methyltransferase (yeast) (Coq5), mRNA.
963	CTDSP1	R1ML0 RFL+	R2ML+ RFL+	-0.0296466	0.220877	0.416726	0.632188	0.00421438	1.9e-07	0.922526	0.0248274	4.19e-06	ILMN_2714397	Mus musculus CTD (carboxy-terminal domain, RNA polymerase II, polypeptide A) small phosphatase 1 (Ctdsp1), mRNA.
964	RTN4IP1	R1ML0 RFL+	R2ML0 RFL+	0.107835	0.269763	0.471036	0.242299	0.0132838	2.7e-07	0.758527	0.0572358	5.64e-06	ILMN_2950957	Mus musculus reticulon 4 interacting protein 1 (Rtn4ip1), mRNA.
965	SMCR7	R1ML0 RFL+	R2ML+ RFL+	0.0842406	0.298693	0.436938	0.311929	0.00912321	6e-08	0.800103	0.0437126	1.7e-06	ILMN_2995370	Mus musculus Smith-Magenis syndrome chromosome region, candidate 7 homolog (human) (Smcr7), mRNA.
966	KLRA19	R1ML0 RFL+	R2ML0 RFL+	-0.00705263	0.101947	0.333098	0.844984	0.184415	3e-08	0.968954	0.363357	9e-07	ILMN_2981486	Mus musculus killer cell lectin-like receptor, subfamily A, member 19 (Klra19), mRNA.
967	FAM149B	R1ML0 RFL+	R2ML+ RFL+	-0.0625489	0.208404	0.248339	0.399976	0.00706965	0.0001687	0.845982	0.0362974	0.0011761	ILMN_2641270	Mus musculus expressed sequence AA536717 (AA536717), transcript variant 2, mRNA.
968	RHBDD3	R1ML0 RFL+	R2ML0 RFL+	0.0326541	0.160535	0.331229	0.621057	0.0221014	1.131e-05	0.917983	0.0830621	0.00012289	ILMN_2595266	Mus musculus rhomboid domain containing 3 (Rhbdd3), mRNA.
969	ACAD10	R1ML0 RFL+	R2ML0 RFL+	-0.114534	0.186728	0.463488	0.469113	0.0748008	0.00052043	0.873104	0.198796	0.00300192	ILMN_2744129	Mus musculus acyl-Coenzyme A dehydrogenase family, member 10 (Acad10), mRNA.
970	ACAD10	R1ML0 RFL+	R2ML0 RFL+	-0.0980226	0.0710965	0.398991	0.401077	0.491118	0.00115965	0.846393	0.669154	0.00581114	ILMN_2821158	Mus musculus acyl-Coenzyme A dehydrogenase family, member 10 (Acad10), mRNA.
971	PEX16	R1ML0 RFL+	R2ML0 RFL+	-0.119526	0.130974	0.51175	0.389072	0.122819	0.00019463	0.841455	0.278462	0.0013224	ILMN_2812824	Mus musculus peroxisome biogenesis factor 16 (Pex16), mRNA.
972	D10JHU81E	R1ML0 RFL+	R2ML0 RFL+	0.11388	0.247404	0.414875	0.328874	0.100525	0.00088097	0.810024	0.243673	0.00462858	ILMN_2991545	Mus musculus DNA segment, Chr 10, Johns Hopkins University 81 expressed (D10Jhu81e), mRNA.
973	GSTK1	R1ML0 RFL+	R2ML0 RFL+	-0.0291654	0.126096	0.546792	0.820204	0.0838873	1.348e-05	0.964347	0.215285	0.00014218	ILMN_2792924	Mus musculus glutathione S-transferase kappa 1 (Gstk1), mRNA.
974	SUOX	R1ML0 RFL+	R2ML+ RFL+	-0.0124286	0.468667	0.590345	0.946938	0.00121687	0.00015555	0.988999	0.00968109	0.00110112	ILMN_2912532	Mus musculus sulfite oxidase (Suox), mRNA.
975	PROSAPIP1	R1ML0 RFL+	R2ML0 RFL+	-0.041203	0.230868	0.498952	0.657007	0.0354783	0.00045969	0.92744	0.117819	0.00271743	ILMN_1243722	Mus musculus ProSAPiP1 protein (Prosapip1), mRNA.
976	ACO2	R1ML0 RFL+	R2ML+ RFL+	-0.15206	0.258868	0.763801	0.19532	0.00108455	8.8e-07	0.721628	0.00880661	1.487e-05	ILMN_2748837
977	SLC25A11	R1ML0 RFL+	R2ML+ RFL+	-0.0214737	0.33786	0.541917	0.768268	0.00079499	8.54e-06	0.952989	0.00688074	9.805e-05	ILMN_3010110	Mus musculus solute carrier family 25 (mitochondrial carrier oxoglutarate carrier), member 11 (Slc25a11), mRNA.
978	DNAJB12	R1ML0 RFL+	R2ML0 RFL+	-0.00827068	0.243825	0.377738	0.915439	0.0232429	9.36e-06	0.983972	0.0861615	0.00010558	ILMN_2644621
979	NDUFS2	R1ML0 RFL+	R2ML+ RFL+	-0.131977	0.31907	0.488027	0.225786	0.00346629	1.698e-05	0.743717	0.0213094	0.00017254	ILMN_1224781	Mus musculus NADH dehydrogenase (ubiquinone) Fe-S protein 2 (Ndufs2), mRNA.
980	ACTR1B	R1ML0 RFL+	R2ML+ RFL+	0.00254135	0.182518	0.333363	0.962798	0.00292624	5.53e-06	0.992762	0.0187007	6.806e-05	ILMN_3161327
981	ECE1	R1ML0 RFL+	R2ML+ RFL+	0.0658045	0.271447	0.447146	0.309603	0.00503173	6.133e-05	0.798461	0.0283802	0.00050307	ILMN_2745993
982	FGFRL1	R1ML0 RFL+	R2ML0 RFL+	0.0219699	0.219851	0.531009	0.78154	0.0241137	9.704e-05	0.955711	0.0885469	0.00074085	ILMN_2621433	Mus musculus fibroblast growth factor receptor-like 1 (Fgfrl1), mRNA.
983	LOC100047214	R1ML0 RFL+	R2ML0 RFL+	0.159902	0.153307	0.528318	0.0435599	0.0687427	7.1e-07	0.532637	0.187559	1.255e-05	ILMN_1255556
984	AFG3L1	R1ML0 RFL+	R2ML0 RFL+	-0.0033985	0.157816	0.415509	0.966409	0.0484724	7.5e-07	0.993136	0.146359	1.302e-05	ILMN_2746055
985	MOSPD3	R1ML0 RFL+	R2ML0 RFL+	0.0934586	0.205982	0.636354	0.30318	0.0154762	0	0.794646	0.0640826	4e-08	ILMN_3153772	Mus musculus motile sperm domain containing 3 (Mospd3), mRNA.
986	MOSPD3	R1ML0 RFL+	R2ML+ RFL+	0.018	0.309167	0.589545	0.893942	0.00302657	2.4e-07	0.97981	0.0191986	5.14e-06	ILMN_2677531	Mus musculus motile sperm domain containing 3 (Mospd3), mRNA.
987	OAZ2	R1ML0 RFL+	R2ML0 RFL+	-0.00457143	0.190667	0.432643	0.910992	0.0185231	0	0.98318	0.0730942	3e-08	ILMN_2683794	Mus musculus ornithine decarboxylase antizyme 2 (Oaz2), mRNA.
988	BOLA3	R1ML0 RFL+	R2ML+ RFL+	-0.111323	0.307939	0.668062	0.370838	0.00736285	2e-07	0.832431	0.0374071	4.35e-06	ILMN_2990197	Mus musculus bolA-like 3 (E. coli) (Bola3), mRNA.
989	MCAT	R1ML0 RFL+	R2ML0 RFL+	-0.0576391	0.229623	0.375863	0.45318	0.0118109	1.65e-06	0.867652	0.0525822	2.519e-05	ILMN_2927635	Mus musculus malonyl CoA:ACP acyltransferase (mitochondrial) (Mcat), mRNA.
990	TSFM	R1ML0 RFL+	R2ML0 RFL+	-0.0197519	0.189105	0.32236	0.780806	0.0190401	1.82e-06	0.955661	0.0745502	2.736e-05	ILMN_2640203
991	MRPS11	R1ML0 RFL+	R2ML+ RFL+	0.0144511	0.184404	0.318274	0.748562	0.00133565	0	0.947763	0.010414	2e-08	ILMN_2786708	Mus musculus mitochondrial ribosomal protein S11 (Mrps11), mRNA.
992	DGCR6	R1ML0 RFL+	R2ML+ RFL+	0.0832556	0.361518	0.674351	0.490731	0.00463455	5.11e-06	0.88204	0.0267298	6.385e-05	ILMN_2967294	Mus musculus DiGeorge syndrome critical region gene 6 (Dgcr6), mRNA.
993	DGCR6	R1ML0 RFL+	R2ML0 RFL+	0.0294887	0.178798	0.58678	0.80345	0.0655705	1.046e-05	0.961171	0.181112	0.00011548	ILMN_2611284	Mus musculus DiGeorge syndrome critical region gene 6 (Dgcr6), mRNA.
994	GALT	R1ML0 RFL+	R2ML+ RFL+	0.113662	0.379781	0.653196	0.233974	0.0018002	9e-08	0.751228	0.0130456	2.27e-06	ILMN_2711442
995	MFSD3	R1ML0 RFL+	R2ML+ RFL+	0.0535639	0.203254	0.420414	0.516871	0.00253974	0	0.891227	0.0168379	1.2e-07	ILMN_2644480	Mus musculus major facilitator superfamily domain containing 3 (Mfsd3), mRNA.
996	LOC100047214	R1ML0 RFL+	R2ML+ RFL+	0.0478947	0.327728	0.514003	0.653881	0.00522886	1.61e-06	0.926748	0.0291466	2.472e-05	ILMN_2616573
997	MRPS10	R1ML0 RFL+	R2ML+ RFL+	0.00056391	0.277421	0.528077	0.995589	0.00940001	8e-08	0.999326	0.0446988	2.06e-06	ILMN_2841840	Mus musculus mitochondrial ribosomal protein S10 (Mrps10), mRNA.
998	PARK7	R1ML0 RFL+	R2ML0 RFL+	-0.0453383	0.0964474	0.457932	0.492561	0.070214	1.7e-07	0.882315	0.190145	3.93e-06	ILMN_2728754	Mus musculus Parkinson disease (autosomal recessive, early onset) 7 (Park7), mRNA.
999	RABGGTA	R1ML0 RFL+	R2ML0 RFL+	-0.0201504	0.209921	0.634077	0.79424	0.0261698	1.24e-06	0.959568	0.094042	1.99e-05	ILMN_1245469
1000	TIMM44	R1ML0 RFL+	R2ML0 RFL+	-0.0499474	0.177386	0.469607	0.470936	0.0407673	2.17e-06	0.873623	0.130026	3.168e-05	ILMN_2589211	Mus musculus translocase of inner mitochondrial membrane 44 (Timm44), mRNA.
1001	TIMM44	R1ML0 RFL+	R2ML0 RFL+	-0.0272782	0.146412	0.420732	0.680228	0.019178	2.3e-07	0.93224	0.0748847	4.97e-06	ILMN_2750428	Mus musculus translocase of inner mitochondrial membrane 44 (Timm44), mRNA.
1002	TIMM44	R1ML0 RFL+	R2ML0 RFL+	0.0345714	0.0553333	0.298092	0.548875	0.287784	2.767e-05	0.897436	0.480613	0.00025869	ILMN_2968676	Mus musculus translocase of inner mitochondrial membrane 44 (Timm44), mRNA.
1003	0610012D14RIK	R1ML0 RFL+	R2ML0 RFL+	-0.0271805	0.179939	0.471807	0.765357	0.0902816	0.00054433	0.952784	0.226316	0.00311183	ILMN_1248518	Mus musculus RIKEN cDNA 0610012D14 gene (0610012D14Rik), mRNA.
1004	ABCC6	R1ML0 RFL+	R2ML0 RFL+	0.0631805	0.227395	0.43153	0.494575	0.0872405	0.00105467	0.883128	0.221218	0.00538484	ILMN_2934941	Mus musculus ATP-binding cassette, sub-family C (CFTR/MRP), member 6 (Abcc6), mRNA.
1005	MACROD1	R1ML0 RFL+	R2ML0 RFL+	0.177707	0.220421	0.724893	0.28179	0.297739	0.0001162	0.782704	0.490577	0.00086673	ILMN_2683986	Mus musculus RIKEN cDNA D930010J01 gene (D930010J01Rik), mRNA.
1006	PRODH2	R1ML0 RFL+	R2ML0 RFL+	-0.0703233	0.138939	0.556991	0.527456	0.155048	0.00053279	0.892371	0.325177	0.00306152	ILMN_2844829	Mus musculus proline dehydrogenase (oxidase) 2 (Prodh2), mRNA.
1007	PRODH2	R1ML0 RFL+	R2ML0 RFL+	-0.00385714	0.0535	0.682173	0.980903	0.697479	0.00023352	0.996495	0.824857	0.00153948	ILMN_2598892	Mus musculus proline dehydrogenase (oxidase) 2 (Prodh2), mRNA.
1008	PRODH2	R1ML0 RFL+	R2ML0 RFL+	0.0507519	0.0477281	0.716292	0.734544	0.714336	0.00010292	0.944959	0.836239	0.00077998	ILMN_1252471	Mus musculus proline dehydrogenase (oxidase) 2 (Prodh2), mRNA.
1009	ACADS	R1ML0 RFL+	R2ML0 RFL+	-0.0431053	0.0650614	0.552973	0.69366	0.646172	0.00024162	0.934772	0.789496	0.00158272	ILMN_2806676	Mus musculus acyl-Coenzyme A dehydrogenase, short chain (Acads), mRNA.
1010	AKR7A5	R1ML0 RFL+	R2ML0 RFL+	-0.0132707	0.131825	0.48319	0.913213	0.300443	0.00020174	0.98358	0.49351	0.00136139	ILMN_2625991	Mus musculus aldo-keto reductase family 7, member A5 (aflatoxin aldehyde reductase) (Akr7a5), mRNA.
1011	AKR7A5	R1ML0 RFL+	R2ML0 RFL+	0.0431353	0.164088	0.693488	0.729837	0.258576	4.08e-06	0.94379	0.450606	5.298e-05	ILMN_2908045	Mus musculus aldo-keto reductase family 7, member A5 (aflatoxin aldehyde reductase) (Akr7a5), mRNA.
1012	2610528J11RIK	R1ML0 RFL+	R2ML0 RFL+	0.0384286	0.112167	0.501345	0.712912	0.132797	8.686e-05	0.940352	0.293311	0.00067471	ILMN_1221084
1013	2700038C09RIK	R1ML0 RFL+	R2ML0 RFL+	0.0227368	0.0750702	0.527238	0.825259	0.437016	5.935e-05	0.964851	0.623598	0.00048993	ILMN_2590015	Mus musculus RIKEN cDNA 2700038C09 gene (2700038C09Rik), mRNA.
1014	2700038C09RIK	R1ML0 RFL+	R2ML0 RFL+	0.0973233	0.0927281	0.556113	0.279742	0.354264	1.299e-05	0.781536	0.547416	0.00013781	ILMN_2894984	Mus musculus RIKEN cDNA 2700038C09 gene (2700038C09Rik), mRNA.
1015	LOC386486	R1ML0 RFL+	R2ML0 RFL+	-0.0253534	0.0507895	0.417616	0.701671	0.470389	1.4e-07	0.936977	0.652432	3.37e-06	ILMN_2534921
1016	YIF1A	R1ML0 RFL+	R2ML0 RFL+	-0.109421	0.110746	0.645435	0.193245	0.100659	7.6e-07	0.720726	0.243839	1.327e-05	ILMN_1235000	Mus musculus Yip1 interacting factor homolog A (S. cerevisiae) (Yif1a), mRNA.
1017	YIF1A	R1ML0 RFL+	R2ML0 RFL+	-0.121699	0.00632456	0.530533	0.141678	0.887428	1.043e-05	0.68341	0.94073	0.0001152	ILMN_1223547	Mus musculus Yip1 interacting factor homolog A (S. cerevisiae) (Yif1a), mRNA.
1018	NME3	R1ML0 RFL+	R2ML0 RFL+	0.0513083	0.00340351	0.352351	0.479572	0.970192	0.00068006	0.876751	0.984212	0.00374592	ILMN_2744414	Mus musculus expressed in non-metastatic cells 3 (Nme3), mRNA.
1019	ARFRP1	R1ML0 RFL+	R2ML0 RFL+	-0.101835	0.18357	0.277839	0.105619	0.0284502	5.647e-05	0.646868	0.100108	0.00046912	ILMN_2631745	Mus musculus ADP-ribosylation factor related protein 1 (Arfrp1), mRNA.
1020	MTIF3	R1ML0 RFL+	R2ML0 RFL+	-0.0773083	0.24143	0.430887	0.501322	0.0214001	0.00012677	0.88668	0.0810848	0.00093019	ILMN_2632187
1021	ATG7	R1ML0 RFL+	R2ML+ RFL+	-0.0483534	0.189956	0.31322	0.555039	8.88e-06	9.8e-07	0.899575	0.00016648	1.631e-05	ILMN_1246724	Mus musculus autophagy-related 7 (yeast) (Atg7), mRNA.
1022	CFL2	R1ML0 RFL+	R2ML0 RFL+	-0.0969549	0.150974	0.285402	0.165433	0.105911	8.4e-06	0.699794	0.252144	9.671e-05	ILMN_1249976
1023	MRPL4	R1ML0 RFL+	R2ML0 RFL+	-0.0783383	0.147114	0.329747	0.35162	0.0715591	4.9e-07	0.821206	0.192581	9.14e-06	ILMN_1257408
1024	CYC1	R1ML0 RFL+	R2ML+ RFL+	0.0136015	0.370649	0.31278	0.881582	0.0005321	0.00022538	0.977256	0.00496848	0.00149536	ILMN_1251771	Mus musculus cytochrome c-1 (Cyc1), mRNA.
1025	LOC100042179	R1ML0 RFL+	R2ML+ RFL+	-0.150692	0.396237	0.48433	0.292769	0.00064425	0.00010634	0.788438	0.0057967	0.00080205	ILMN_2618461	Mus musculus mitochondria-associated protein involved in granulocyte-macrophage colony-stimulating factor signal transduction (Magmas), mRNA.
1026	MRTO4	R1ML0 RFL+	R2ML0 RFL+	-0.0932105	0.347123	0.486292	0.535652	0.0171239	4.223e-05	0.895515	0.0690789	0.00036814	ILMN_2772380
1027	LOC100048301	R1ML0 RFL+	R2ML+ RFL+	-0.0608722	0.369509	0.429729	0.626872	0.00516892	2.772e-05	0.920116	0.0289066	0.00025899	ILMN_2666438
1028	PLXNC1	R1ML0 RFL+	R2ML0 RFL+	-0.0125714	0.0948333	0.232518	0.803149	0.171921	7.231e-05	0.961171	0.347796	0.00057958	ILMN_2756855
1029	EXOSC5	R1ML0 RFL+	R2ML0 RFL+	0.0174662	0.0748947	0.303024	0.878513	0.282992	5.951e-05	0.976708	0.475465	0.00049078	ILMN_2877280	Mus musculus exosome component 5 (Exosc5), mRNA.
1030	MFSD3	R1ML0 RFL+	R2ML0 RFL+	0.0543233	0.0688947	0.360857	0.507187	0.284175	4e-08	0.88833	0.476701	1.26e-06	ILMN_2644477	Mus musculus major facilitator superfamily domain containing 3 (Mfsd3), mRNA.
1031	NSUN5	R1ML0 RFL+	R2ML0 RFL+	0.00623308	0.109447	0.339045	0.914993	0.0251273	0	0.983708	0.0912491	2e-08	ILMN_2604056	Mus musculus NOL1/NOP2/Sun domain family, member 5 (Nsun5), mRNA.
1032	HDGF	R1ML0 RFL+	R2ML+ RFL+	0.0345038	0.268956	0.396676	0.650788	0.0056282	7.4e-07	0.926653	0.0308441	1.298e-05	ILMN_2744435	Mus musculus hepatoma-derived growth factor (Hdgf), mRNA.
1033	PPM1B	R1ML0 RFL+	R2ML0 RFL+	-0.173038	0.174772	0.346536	0.167213	0.0116355	0.00020858	0.700884	0.0520087	0.00139947	ILMN_2729953
1034	SNRK	R1ML0 RFL+	R2ML+ RFL+	-0.0664887	0.392368	0.428643	0.536738	0.00171022	1.773e-05	0.895515	0.0125457	0.00017903	ILMN_1259356	Mus musculus SNF related kinase (Snrk), mRNA.
1035	1700020C11RIK	R1ML0 RFL+	R2ML0 RFL+	0.025594	0.164904	0.415896	0.789924	0.0376336	2.18e-05	0.958411	0.122881	0.00021275	ILMN_2624145
1036	FKBP4	R1ML0 RFL+	R2ML+ RFL+	-0.0481955	0.328947	0.648339	0.793269	0.00606302	0.0004062	0.959568	0.0325008	0.00244797	ILMN_1257428
1037	GSTT1	R1ML0 RFL+	R2ML+ RFL+	0.036797	0.479702	0.917295	0.873422	0.0050471	4.683e-05	0.975871	0.0284544	0.00040123	ILMN_2680533	Mus musculus glutathione S-transferase, theta 1 (Gstt1), mRNA.
1038	MRPL49	R1ML0 RFL+	R2ML+ RFL+	-0.0393383	0.451114	0.496604	0.71717	0.00310713	0.00011836	0.941548	0.0195648	0.00087894	ILMN_2634295	Mus musculus mitochondrial ribosomal protein L49 (Mrpl49), mRNA.
1039	DHRS1	R1ML0 RFL+	R2ML+ RFL+	-0.0202481	0.270228	0.599226	0.908418	0.00592776	0.00038244	0.98318	0.031981	0.00232873	ILMN_2639397	Mus musculus dehydrogenase/reductase (SDR family) member 1 (Dhrs1), mRNA.
1040	SAR1B	R1ML0 RFL+	R2ML+ RFL+	-0.116947	0.411719	0.440095	0.39095	0.00999698	0.00053075	0.842231	0.0466881	0.00305254	ILMN_2997998	Mus musculus SAR1 gene homolog B (S. cerevisiae) (Sar1b), mRNA.
1041	1810046J19RIK	R1ML0 RFL+	R2ML+ RFL+	-0.0464286	0.409667	0.55431	0.614586	0.00026329	4.61e-06	0.916621	0.00280855	5.882e-05	ILMN_1250709
1042	DNAJB2	R1ML0 RFL+	R2ML0 RFL+	-0.154	0.333333	0.685616	0.294842	0.0218228	1.63e-06	0.789585	0.0822982	2.489e-05	ILMN_2725428	Mus musculus DnaJ (Hsp40) homolog, subfamily B, member 10 (Dnajb10), transcript variant 2, mRNA.
1043	INTS3	R1ML0 RFL+	R2ML+ RFL+	-0.0785865	0.250175	0.37306	0.320324	0.00043595	1.629e-05	0.804316	0.00424023	0.00016675	ILMN_2711570	Mus musculus integrator complex subunit 3 (Ints3), transcript variant 1, mRNA.
1044	2610024G14RIK	R1ML0 RFL+	R2ML+ RFL+	0.0209323	0.326623	0.413312	0.750319	0.00024461	4.9e-07	0.948304	0.00264036	9.14e-06	ILMN_2599935	Mus musculus RIKEN cDNA 2610024G14 gene (2610024G14Rik), mRNA.
1045	2610024G14RIK	R1ML0 RFL+	R2ML+ RFL+	0.0528647	0.352079	0.505836	0.579008	7.64e-06	9e-08	0.906026	0.00014686	2.43e-06	ILMN_1258552	Mus musculus RIKEN cDNA 2610024G14 gene (2610024G14Rik), mRNA.
1046	HDGF	R1ML0 RFL+	R2ML+ RFL+	0.112323	0.367395	0.651268	0.293732	2.445e-05	1e-08	0.789024	0.00039219	2.9e-07	ILMN_1244324	Mus musculus hepatoma-derived growth factor (Hdgf), mRNA.
1047	HDGF	R1ML0 RFL+	R2ML+ RFL+	-0.0324135	0.407491	0.765271	0.803923	2.815e-05	0	0.961171	0.00044003	4e-08	ILMN_2744439	Mus musculus hepatoma-derived growth factor (Hdgf), mRNA.
1048	TUBA4A	R1ML0 RFL+	R2ML+ RFL+	0.00770677	0.304254	0.373765	0.890242	0.00702048	1.35e-06	0.979381	0.0361317	2.122e-05	ILMN_2517170	Mus musculus tubulin, alpha 4A (Tuba4a), mRNA.
1049	ADCK1	R1ML0 RFL+	R2ML+ RFL+	0.0535263	0.223526	0.355619	0.469401	0.00018317	1e-08	0.873104	0.00208182	4e-07	ILMN_2656440
1050	MTAP	R1ML0 RFL+	R2ML+ RFL+	-0.0139248	0.391956	0.450226	0.837206	3.1e-07	6.3e-07	0.966776	8.79e-06	1.131e-05	ILMN_2742867	Mus musculus methylthioadenosine phosphorylase (Mtap), mRNA.
1051	2810410C14RIK	R1ML0 RFL+	R2ML0 RFL+	-0.0313158	0.208351	0.326935	0.63247	0.0130904	6.516e-05	0.922655	0.0567256	0.00053039	ILMN_2964728	Mus musculus RIKEN cDNA 2810410C14 gene (2810410C14Rik), mRNA.
1052	MGMT	R1ML0 RFL+	R2ML0 RFL+	0.0354211	0.200754	0.373952	0.664459	0.0419811	0.000237	0.929977	0.132618	0.00155718	ILMN_2876448	Mus musculus O-6-methylguanine-DNA methyltransferase (Mgmt), mRNA.
1053	EG433224	R1ML0 RFL+	R2ML+ RFL+	-0.0508722	0.313342	0.383759	0.606592	0.00044858	0.00053266	0.914123	0.00433843	0.00306144	ILMN_3150205	Mus musculus predicted gene, EG433224 (EG433224) on chromosome 19.
1054	RMND1	R1ML0 RFL+	R2ML+ RFL+	-0.136669	0.322307	0.47725	0.253688	0.00344191	1.371e-05	0.765071	0.0212103	0.00014398	ILMN_2955535	Mus musculus required for meiotic nuclear division 1 homolog (S. cerevisiae) (Rmnd1), mRNA.
1055	NEU2	R1ML0 RFL+	R2ML0 RFL+	-0.106241	0.14164	0.309595	0.205092	0.126308	0.00111949	0.72679	0.284066	0.00564846	ILMN_2662728	Mus musculus neuraminidase 2 (Neu2), mRNA.
1056	ACADS	R1ML0 RFL+	R2ML0 RFL+	-0.124135	0.313912	0.491205	0.306027	0.0252426	0.00028547	0.795671	0.0915668	0.0018188	ILMN_1256725	Mus musculus acyl-Coenzyme A dehydrogenase, short chain (Acads), mRNA.
1057	COPS7A	R1ML0 RFL+	R2ML+ RFL+	-0.0558571	0.2565	0.405274	0.410592	0.0007033	2.5e-07	0.849151	0.00622122	5.19e-06	ILMN_2682787	Mus musculus COP9 (constitutive photomorphogenic) homolog, subunit 7a (Arabidopsis thaliana) (Cops7a), mRNA.
1058	MRPL10	R1ML0 RFL+	R2ML+ RFL+	-0.0287744	0.350702	0.451807	0.728403	8.04e-06	1.15e-06	0.94307	0.000153	1.868e-05	ILMN_2822621	Mus musculus mitochondrial ribosomal protein L10 (Mrpl10), mRNA.
1059	ALS2	R1ML0 RFL+	R2ML+ RFL+	0.0879173	0.583132	0.433039	0.297191	0.00097993	0.00022036	0.791496	0.00812301	0.00146659	ILMN_2620053	Mus musculus amyotrophic lateral sclerosis 2 (juvenile) homolog (human) (Als2), mRNA.
1060	BRP17	R1ML0 RFL+	R2ML+ RFL+	0.155271	0.396342	0.51653	0.327489	0.00864242	0.00222371	0.809543	0.041974	0.00998953	ILMN_2731550
1061	PNKD	R1ML0 RFL+	R2ML0 RFL+	0.0324436	0.253325	0.402152	0.700847	0.0152626	1.2e-07	0.93694	0.0634839	2.88e-06	ILMN_1221275
1062	STOML2	R1ML0 RFL+	R2ML+ RFL+	-0.0341579	0.252842	0.307699	0.546918	0.00391877	5.52e-06	0.896668	0.0234897	6.8e-05	ILMN_2721799	Mus musculus stomatin (Epb7.2)-like 2 (Stoml2), mRNA.
1063	STRA13	R1ML0 RFL+	R2ML+ RFL+	-0.0134286	0.165833	0.193673	0.703109	0.00509894	7.52e-06	0.937643	0.0286273	8.832e-05	ILMN_1237761	Mus musculus stimulated by retinoic acid 13 (Stra13), mRNA.
1064	5530601I19RIK	R1ML0 RFL+	R2ML0 RFL+	0.0132932	0.145579	0.223089	0.825268	0.00265901	0.00074892	0.964851	0.0174308	0.00404484	ILMN_2622780
1065	MGST3	R1ML0 RFL+	R2ML0 RFL+	-0.0756541	0.417132	0.850196	0.783503	0.0405274	0.00164901	0.956306	0.129483	0.0077951	ILMN_2615035	Mus musculus microsomal glutathione S-transferase 3 (Mgst3), mRNA.
1066	NDUFA7	R1ML0 RFL+	R2ML0 RFL+	-0.0348496	0.135246	0.27928	0.717811	0.00017105	0.00016185	0.941582	0.00197063	0.00113543	ILMN_2629044	Mus musculus NADH dehydrogenase (ubiquinone) 1 alpha subcomplex, 7 (B14.5a) (Ndufa7), mRNA.
1067	6430573F11RIK	R1ML0 RFL+	R2ML+ RFL+	0.151917	0.351132	0.439699	0.252948	0.00591568	0.00081847	0.764815	0.0319427	0.00434728	ILMN_2893471	Mus musculus RIKEN cDNA 6430573F11 gene (6430573F11Rik), mRNA.
1068	HIBADH	R1ML0 RFL+	R2ML+ RFL+	-0.0732707	0.296325	0.265268	0.517118	0.00118492	0.00972298	0.891227	0.00947381	0.0335641	ILMN_1247221	Mus musculus 3-hydroxyisobutyrate dehydrogenase (Hibadh), mRNA.
1069	BCDO2	R1ML0 RFL+	R2ML+ RFL+	0.0776015	0.385649	0.326491	0.529958	0.00774291	0.00476947	0.893103	0.0387798	0.0187891	ILMN_2774486
1070	MREG	R1ML0 RFL+	R2ML+ RFL+	0.265662	0.729114	0.728295	0.251096	0.00381628	0.0003504	0.763947	0.022988	0.00216758	ILMN_2976159	Mus musculus melanoregulin (Mreg), mRNA.
1071	CABC1	R1ML0 RFL+	R2ML+ RFL+	0.210444	0.398158	0.380348	0.149264	0.00511042	0.00211624	0.686444	0.0286793	0.00958279	ILMN_2800813	Mus musculus chaperone, ABC1 activity of bc1 complex like (S. pombe) (Cabc1), mRNA.
1072	CCL27	R1ML0 RFL+	R2ML0 RFL+	0.0185714	0.229667	0.320152	0.770908	0.0721841	0.00050569	0.953967	0.193765	0.00293666	ILMN_1216183	Mus musculus chemokine (C-C motif) ligand 27 (Ccl27), transcript variant 1, mRNA.
1073	CCDC109A	R1ML0 RFL+	R2ML+ RFL+	-0.0108571	0.3185	0.264774	0.919741	0.00044482	0.00721439	0.984927	0.00430616	0.026401	ILMN_2533766
1074	NQO2	R1ML0 RFL0	R2ML+ RFL0	0.147451	0.485904	0.31164	0.261277	0.00234629	0.0273616	0.768401	0.0159126	0.076003	ILMN_2968729	Mus musculus NAD(P)H dehydrogenase, quinone 2 (Nqo2), mRNA.
1075	OMA1	R1ML0 RFL+	R2ML0 RFL+	-0.0329925	0.209412	0.234357	0.724008	0.0240482	0.00049275	0.942708	0.0883808	0.00287189	ILMN_2764865	Mus musculus OMA1 homolog, zinc metallopeptidase (S. cerevisiae) (Oma1), mRNA.
1076	PRKACA	R1ML0 RFL+	R2ML+ RFL+	0.115316	0.308816	0.278568	0.150727	0.00019023	0.00490349	0.688044	0.00215158	0.019211	ILMN_2833378	Mus musculus protein kinase, cAMP dependent, catalytic, alpha (Prkaca), mRNA.
1077	ACBD4	R1ML0 RFL+	R2ML0 RFL+	-0.00588722	0.235184	0.365476	0.95867	0.073491	0.00170364	0.991878	0.196322	0.00800921	ILMN_3150296
1078	PEX5	R1ML0 RFL+	R2ML0 RFL+	0.0266165	0.25464	0.258637	0.746645	0.0334345	0.00359809	0.947395	0.112737	0.0148698	ILMN_1258867
1079	BC024814	R1ML0 RFL+	R2ML0 RFL+	-0.0762105	0.185456	0.300137	0.271728	0.0525852	2.148e-05	0.776505	0.154808	0.00021041	ILMN_2592909
1080	LOC677144	R1ML0 RFL+	R2ML+ RFL+	-0.0484586	0.389851	0.461708	0.708437	0.00526869	5.7e-07	0.939338	0.0293051	1.051e-05	ILMN_2641150	Mus musculus lactamase, beta (Lactb), mRNA.
1081	PRRG2	R1ML0 RFL+	R2ML0 RFL+	-0.170451	0.108263	0.435545	0.211359	0.399523	1.143e-05	0.732404	0.5901	0.00012383	ILMN_1245984	Mus musculus proline-rich Gla (G-carboxyglutamic acid) polypeptide 2 (Prrg2), mRNA.
1082	ATP5J2	R1ML0 RFL+	R2ML+ RFL+	-0.104602	0.229518	0.193774	0.0756542	0.00583779	0.00231867	0.599132	0.0316427	0.0103209	ILMN_1213914	Mus musculus ATP synthase, H+ transporting, mitochondrial F0 complex, subunit f, isoform 2 (Atp5j2), mRNA.
1083	TMEM70	R1ML0 RFL+	R2ML0 RFL+	-0.0892707	0.185658	0.23306	0.217871	0.15897	0.00384017	0.737781	0.330527	0.0156985	ILMN_3153614
1084	CRYL1	R1ML0 RFL+	R2ML+ RFL+	-0.0132632	0.683404	0.689908	0.956645	0.00305416	6.02e-05	0.991314	0.01931	0.00049506	ILMN_2833936	Mus musculus crystallin, lambda 1 (Cryl1), mRNA.
1085	GSTA4	R1ML0 RFL+	R2ML0 RFL+	-0.0581579	0.650342	0.797592	0.845232	0.0141333	0.00038326	0.969163	0.059872	0.00233268	ILMN_2892441	Mus musculus glutathione S-transferase, alpha 4 (Gsta4), mRNA.
1086	HRSP12	R1ML0 RFL+	R2ML+ RFL+	0.0535263	0.46286	0.628074	0.698344	0.00177274	0.00019385	0.936271	0.012883	0.00131957	ILMN_2610706	Mus musculus heat-responsive protein 12 (Hrsp12), mRNA.
1087	HRSP12	R1ML0 RFL+	R2ML+ RFL+	0.093188	0.492807	0.612244	0.516528	0.00365157	0.0001325	0.891227	0.0221726	0.00096621	ILMN_2610703	Mus musculus heat-responsive protein 12 (Hrsp12), mRNA.
1088	HRSP12	R1ML0 RFL+	R2ML+ RFL+	0.0896015	0.491982	0.480985	0.575907	0.00634754	0.00263368	0.905132	0.0335623	0.0114961	ILMN_2816876	Mus musculus heat-responsive protein 12 (Hrsp12), mRNA.
1089	NDUFA5	R1ML0 RFL+	R2ML+ RFL+	-0.0182105	0.445789	0.362104	0.862423	7.358e-05	0.00057074	0.973345	0.00097565	0.00324119	ILMN_1216007	Mus musculus NADH dehydrogenase (ubiquinone) 1 alpha subcomplex, 5 (Ndufa5), mRNA.
1090	NDUFB3	R1ML0 RFL+	R2ML0 RFL+	0.156143	0.279	0.427399	0.148515	0.033739	0.00011678	0.68621	0.113421	0.00086983	ILMN_2734511	Mus musculus NADH dehydrogenase (ubiquinone) 1 beta subcomplex 3 (Ndufb3), mRNA.
1091	NDUFA6	R1ML0 RFL+	R2ML0 RFL+	-0.057	0.135833	0.292527	0.128597	0.0491726	4.959e-05	0.669605	0.148013	0.00042002	ILMN_2898406	Mus musculus NADH dehydrogenase (ubiquinone) 1 alpha subcomplex, 6 (B14) (Ndufa6), mRNA.
1092	NIPSNAP1	R1ML0 RFL+	R2ML0 RFL+	-0.00664662	0.179044	0.25872	0.919933	0.0663825	0.0074945	0.984927	0.182715	0.0272284	ILMN_2619861
1093	SERPINF1	R1ML0 RFL+	R2ML0 RFL+	-0.222271	0.180158	0.249506	0.00246908	0.0777225	0.0038391	0.240403	0.204122	0.0156985	ILMN_2639239
1094	2810428I15RIK	R1ML0 RFL+	R2ML0 RFL+	-0.0385113	0.0629649	0.420262	0.733046	0.241702	0.00023344	0.944348	0.431231	0.00153948	ILMN_2749143
1095	LCMT1	R1ML0 RFL+	R2ML+ RFL+	0.019188	0.23814	0.287229	0.732388	1.386e-05	0.00218212	0.944267	0.00024254	0.00983407	ILMN_2943477	Mus musculus leucine carboxyl methyltransferase 1 (Lcmt1), mRNA.
1096	SUPT3H	R1ML0 RFL+	R2ML+ RFL+	-0.0423233	0.336439	0.462533	0.611242	0.00066775	0.00046305	0.91568	0.0059726	0.00273477	ILMN_1213872	Mus musculus suppressor of Ty 3 homolog (S. cerevisiae) (Supt3h), mRNA.
1097	LOC622404	R1ML0 RFL+	R2ML0 RFL+	0.0544662	0.0793947	0.409354	0.679471	0.416272	0.00846696	0.93224	0.605236	0.0300021	ILMN_2872552	Mus musculus hypothetical protein LOC622404 (LOC622404), mRNA.
1098	TRAP1	R1ML0 RFL+	R2ML+ RFL+	0.0157895	0.187623	0.297042	0.837838	0.00205137	0.00732028	0.967152	0.0144325	0.0266985	ILMN_2422333
1099	ACOT7	R1ML0 RFL+	R2ML0 RFL+	-0.00977444	0.0255351	0.20233	0.862552	0.733209	0.00240407	0.973345	0.84737	0.0106338	ILMN_2606180	Mus musculus acyl-CoA thioesterase 7 (Acot7), mRNA.
1100	ALKBH7	R1ML0 RFL+	R2ML0 RFL+	0.0210602	0.239298	0.42528	0.835022	0.0173905	0.00021762	0.966211	0.0698803	0.00145025	ILMN_1251766	Mus musculus alkB, alkylation repair homolog 7 (E. coli) (Alkbh7), mRNA.
1101	KPTN	R1ML0 RFL+	R2ML0 RFL+	0.0923233	0.135395	0.187798	0.0521723	0.0285754	0.00226966	0.55628	0.100466	0.010145	ILMN_2732642	Mus musculus kaptin (Kptn), mRNA.
1102	ARPC1A	R1ML0 RFL+	R2ML0 RFL+	-0.0182406	0.101974	0.216756	0.648227	0.0495336	0.00011796	0.926377	0.148723	0.00087698	ILMN_1220452
1103	DCTN4	R1ML0 RFL+	R2ML0 RFL+	-0.0236692	0.144307	0.275696	0.753784	0.020031	0.00023904	0.949695	0.0774156	0.00156981	ILMN_2630293
1104	SNUPN	R1ML0 RFL+	R2ML+ RFL+	-0.0142331	0.208219	0.267342	0.713446	0.00166674	0.00012306	0.940464	0.0123076	0.00090815	ILMN_2670415	Mus musculus snurportin 1 (Snupn), mRNA.
1105	MRPS27	R1ML0 RFL+	R2ML0 RFL+	0.096782	0.191711	0.391006	0.156309	0.0142495	8.93e-06	0.693248	0.0602548	0.00010157	ILMN_2588199
1106	DHODH	R1ML0 RFL+	R2ML0 RFL+	0.0336767	0.147772	0.24086	0.513933	0.0454345	0.00026985	0.890792	0.140177	0.00173448	ILMN_1244112
1107	MTRF1	R1ML0 RFL+	R2ML+ RFL+	0.050015	0.186658	0.186238	0.384537	0.00173668	0.00229838	0.839159	0.0126963	0.0102537	ILMN_2646556	Mus musculus mitochondrial translational release factor 1 (Mtrf1), mRNA.
1108	MEA1	R1ML0 RFL+	R2ML0 RFL+	-0.0294737	0.094693	0.227857	0.726949	0.0622632	0.00068923	0.942708	0.174441	0.00377876	ILMN_2750258	Mus musculus male enhanced antigen 1 (Mea1), mRNA.
1109	UBIAD1	R1ML0 RFL+	R2ML0 RFL+	0.0302932	0.123579	0.224369	0.500251	0.0376807	4.9e-07	0.886149	0.122956	9.15e-06	ILMN_1243170	Mus musculus UbiA prenyltransferase domain containing 1 (Ubiad1), mRNA.
1110	SLC2A9	R1ML0 RFL0	R2ML+ RFL0	0.0327594	0.157474	0.128018	0.394027	0.00996947	0.0189185	0.843777	0.0466292	0.0569314	ILMN_3108560	Mus musculus solute carrier family 2 (facilitated glucose transporter), member 9 (Slc2a9), transcript variant a, mRNA.
1111	TMEM25	R1ML0 RFL+	R2ML0 RFL+	0.0297293	0.147491	0.205018	0.58863	0.0874959	0.0098057	0.90798	0.221647	0.0337907	ILMN_2506077	Mus musculus transmembrane protein 25 (Tmem25), mRNA.
1112	TMEM25	R1ML0 RFL+	R2ML0 RFL+	0.0251353	0.201754	0.253896	0.422388	0.0417182	0.00094447	0.855803	0.132154	0.00490901	ILMN_2506076	Mus musculus transmembrane protein 25 (Tmem25), mRNA.
1113	AKP2	R1ML0 RFL+	R2ML+ RFL+	-0.0711353	0.282079	0.313003	0.307597	0.00132458	3.62e-05	0.796636	0.0103584	0.00032404	ILMN_2661287	Mus musculus alkaline phosphatase 2, liver (Akp2), mRNA.
1114	ATP9A	R1ML0 RFL+	R2ML0 RFL+	-0.0322331	0.282386	0.58225	0.764802	0.0350771	7.71e-06	0.952463	0.116849	9.023e-05	ILMN_1255220
1115	ATP9A	R1ML0 RFL+	R2ML+ RFL+	-0.061406	0.211404	0.36933	0.500139	0.00620724	1.125e-05	0.886149	0.0330722	0.00012234	ILMN_2629528
1116	DAAM1	R1ML0 RFL+	R2ML+ RFL+	-0.0599173	0.255702	0.331884	0.21045	0.00259427	2.163e-05	0.731271	0.0170892	0.00021129	ILMN_3104857	Mus musculus dishevelled associated activator of morphogenesis 1 (Daam1), transcript variant 1, mRNA.
1117	1110018J18RIK	R1ML0 RFL+	R2ML0 RFL+	-0.0499248	0.193956	0.203307	0.524163	0.0578469	0.0111695	0.892161	0.165884	0.0375388	ILMN_2674655	Mus musculus RIKEN cDNA 1110018J18 gene (1110018J18Rik), mRNA.
1118	1110018J18RIK	R1ML0 RFL+	R2ML0 RFL+	-0.0765564	0.184325	0.257458	0.381521	0.135743	0.00120936	0.837975	0.297792	0.0060238	ILMN_2647669	Mus musculus RIKEN cDNA 1110018J18 gene (1110018J18Rik), mRNA.
1119	AKT1S1	R1ML0 RFL+	R2ML0 RFL+	-0.0368872	0.100518	0.227988	0.683106	0.18682	0.00315314	0.932291	0.366062	0.0133355	ILMN_1214358	Mus musculus AKT1 substrate 1 (proline-rich) (Akt1s1), mRNA.
1120	PEX6	R1ML0 RFL+	R2ML0 RFL+	0.0305564	0.245675	0.380482	0.782251	0.0249615	0.00012744	0.955855	0.0908067	0.00093382	ILMN_2944576	Mus musculus peroxisomal biogenesis factor 6 (Pex6), mRNA.
1121	FAM116B	R1ML0 RFL+	R2ML+ RFL+	0.0254135	0.208842	0.234241	0.61631	0.00317342	0.00036635	0.916964	0.019888	0.00225	ILMN_2671266
1122	MBTPS1	R1ML0 RFL0	R2ML+ RFL0	-0.0260075	0.191754	0.126696	0.692496	0.00406208	0.0248136	0.934566	0.0241404	0.0704413	ILMN_1239494	Mus musculus membrane-bound transcription factor peptidase, site 1 (Mbtps1), mRNA.
1123	1110049F12RIK	R1ML0 RFL+	R2ML0 RFL+	0.050188	0.0966404	0.20694	0.593927	0.331015	0.00761192	0.908942	0.524711	0.0275653	ILMN_1255697	Mus musculus RIKEN cDNA 1110049F12 gene (1110049F12Rik), mRNA.
1124	DNMBP	R1ML0 RFL+	R2ML0 RFL+	-0.0133534	0.170123	0.258726	0.910196	0.0778505	0.00369424	0.98318	0.204344	0.0152084	ILMN_1218651
1125	ALDH2	R1ML0 RFL0	R2ML+ RFL0	-0.101647	0.167711	0.149685	0.203279	0.00197483	0.0157251	0.725163	0.0140074	0.0491591	ILMN_2733179
1126	KCMF1	R1ML0 RFL+	R2ML0 RFL+	-0.10318	0.107272	0.177958	0.134	0.0647946	0.00193315	0.676458	0.179595	0.0088866	ILMN_2611155
1127	2810004N20RIK	R1ML0 RFL+	R2ML+ RFL+	0.00621053	0.316377	0.218327	0.935662	0.00308881	0.00010005	0.987149	0.0194637	0.00076113	ILMN_2602406
1128	NQO1	R1ML0 RFL+	R2ML0 RFL+	0.0782857	0.2445	0.407708	0.52524	0.0331591	4.232e-05	0.892161	0.112087	0.00036875	ILMN_2726371
1129	4933422H20RIK	R1ML0 RFL+	R2ML0 RFL+	0.0412406	-0.0929737	0.355024	0.752067	0.368021	0.00167072	0.948952	0.561149	0.00788043	ILMN_3161452	Mus musculus RIKEN cDNA 4933422H20 gene (4933422H20Rik), mRNA.
1130	FMO1	R1ML0 RFL+	R2ML0 RFL+	-0.17082	0.193561	0.332211	0.373823	0.153042	0.0121148	0.834505	0.322301	0.0399119	ILMN_2838308	Mus musculus flavin containing monooxygenase 1 (Fmo1), mRNA.
1131	SLC47A1	R1ML0 RFL+	R2ML0 RFL+	-0.0401654	0.18493	0.314979	0.80762	0.21593	0.0153689	0.961873	0.401212	0.0482216	ILMN_2749840	Mus musculus RIKEN cDNA 1300013J15 gene (1300013J15Rik), mRNA.
1132	GLDC	R1ML0 RFL+	R2ML0 RFL+	0.0302256	0.354368	0.556312	0.842108	0.0320634	0.00039305	0.968472	0.109436	0.00238286	ILMN_1218747	Mus musculus glycine decarboxylase (Gldc), mRNA.
1133	9530058B02RIK	R1ML0 RFL+	R2ML0 RFL+	-0.177218	0.0470439	0.478086	0.299498	0.757187	0.0023868	0.793177	0.864441	0.0105729	ILMN_2592010	Mus musculus RIKEN cDNA 9530058B02 gene (9530058B02Rik), mRNA.
1134	ATP5J	R1ML0 RFL+	R2ML0 RFL+	-0.155872	0.121175	0.332226	0.17652	0.114295	0.00030412	0.707869	0.265267	0.00191919	ILMN_2611261	Mus musculus ATP synthase, H+ transporting, mitochondrial F0 complex, subunit F (Atp5j), mRNA.
1135	TMEM42	R1ML0 RFL+	R2ML0 RFL+	-0.0514586	0.0725175	0.277015	0.457041	0.506441	2.56e-06	0.869255	0.68179	3.587e-05	ILMN_2604467	Mus musculus transmembrane protein 42 (Tmem42), mRNA.
1136	APOE	R1ML0 RFL+	R2ML+ RFL+	-0.128917	0.167202	0.239042	0.287411	0.00386855	0.00412144	0.787019	0.0232267	0.016668	ILMN_1216042	Mus musculus apolipoprotein E (Apoe), mRNA.
1137	COX5B	R1ML0 RFL+	R2ML0 RFL+	-0.150226	0.0274649	0.25222	0.0119646	0.542231	0.00079111	0.378749	0.710541	0.00422731	ILMN_1241962
1138	UQCRC1	R1ML0 RFL+	R2ML0 RFL+	-0.101707	0.169579	0.383357	0.30082	0.020766	0.00020903	0.793775	0.0792668	0.00140213	ILMN_1256673	Mus musculus ubiquinol-cytochrome c reductase core protein 1 (Uqcrc1), mRNA.
1139	PPP5C	R1ML0 RFL+	R2ML0 RFL+	-0.124436	0.128921	0.272357	0.147255	0.0601737	0.00019643	0.68589	0.170577	0.00133116	ILMN_2724795	Mus musculus protein phosphatase 5, catalytic subunit (Ppp5c), mRNA.
1140	PDCD5	R1ML0 RFL+	R2ML0 RFL+	-0.0456015	0.100184	0.249327	0.477617	0.0920462	0.0012594	0.875998	0.229397	0.00623561	ILMN_2636116
1141	MRPL34	R1ML0 RFL+	R2ML0 RFL+	-0.157045	0.135026	0.412616	0.208096	0.107201	2.448e-05	0.729831	0.25401	0.00023379	ILMN_2744204
1142	UCK1	R1ML0 RFL+	R2ML0 RFL+	-0.0598271	0.107482	0.278661	0.599091	0.228565	0.0108268	0.910639	0.415995	0.0366412	ILMN_1254231	Mus musculus uridine-cytidine kinase 1 (Uck1), mRNA.
1143	RAB1B	R1ML0 RFL+	R2ML+ RFL+	-0.0376015	0.305684	0.302887	0.645835	0.00010538	7.616e-05	0.926215	0.00132289	0.00060498	ILMN_2693124	Mus musculus RAB1B, member RAS oncogene family (Rab1b), mRNA.
1144	RAD23A	R1ML0 RFL+	R2ML+ RFL+	0.0376241	0.229386	0.218497	0.679847	0.00251586	0.00061357	0.93224	0.0167098	0.00344256	ILMN_2662743	Mus musculus RAD23a homolog (S. cerevisiae) (Rad23a), mRNA.
1145	CEBPA	R1ML0 RFL+	R2ML+ RFL+	-0.00995489	0.509807	0.475869	0.939518	0.0105504	0.00316836	0.988082	0.0485577	0.0133851	ILMN_1247147
1146	PCBD2	R1ML0 RFL+	R2ML0 RFL+	-0.0851805	0.251105	0.278702	0.383011	0.0460191	0.00635812	0.838873	0.141421	0.0238344	ILMN_2876775	Mus musculus pterin 4 alpha carbinolamine dehydratase/dimerization cofactor of hepatocyte nuclear factor 1 alpha (TCF1) 2 (Pcbd2), mRNA.
1147	SDHC	R1ML0 RFL+	R2ML+ RFL+	-0.0417368	0.175596	0.226182	0.505761	0.0100143	0.00202539	0.887281	0.0467217	0.00924446	ILMN_2594149	Mus musculus succinate dehydrogenase complex, subunit C, integral membrane protein (Sdhc), mRNA.
1148	DLST	R1ML0 RFL+	R2ML0 RFL+	0.0467068	0.183921	0.444786	0.589451	0.0611988	1.31e-06	0.908264	0.172515	2.078e-05	ILMN_1237507
1149	PDK2	R1ML0 RFL+	R2ML0 RFL+	0.0594737	0.22214	0.328131	0.516347	0.0376028	0.00070919	0.891227	0.122796	0.00386758	ILMN_2737658	Mus musculus pyruvate dehydrogenase kinase, isoenzyme 2 (Pdk2), mRNA.
1150	SPG7	R1ML0 RFL+	R2ML0 RFL+	-0.0572857	0.249167	0.253777	0.458303	0.0204492	1.433e-05	0.869455	0.0784186	0.00014982	ILMN_2600309	Mus musculus spastic paraplegia 7 homolog (human) (Spg7), mRNA.
1151	RAB43	R1ML0 RFL+	R2ML0 RFL+	-0.00966165	0.151886	0.294196	0.886606	0.0372684	0.0014754	0.97853	0.121998	0.00709589	ILMN_3155342
1152	UCK1	R1ML0 RFL+	R2ML0 RFL+	0.00177444	0.176965	0.421375	0.979813	0.0854006	2.054e-05	0.996408	0.21782	0.0002025	ILMN_2970429	Mus musculus uridine-cytidine kinase 1 (Uck1), mRNA.
1153	AA536717	R1ML0 RFL+	R2ML0 RFL+	-0.00738346	0.21264	0.198604	0.891515	0.0162267	0.00136882	0.979482	0.0664294	0.00667324	ILMN_2641269	Mus musculus expressed sequence AA536717 (AA536717), transcript variant 2, mRNA.
1154	EXDL2	R1ML0 RFL0	R2ML+ RFL0	0.0124286	0.267667	0.154598	0.859297	0.00642067	0.0450132	0.972152	0.0338445	0.111083	ILMN_2728538	Mus musculus exonuclease 3''-5'' domain-like 2 (Exdl2), mRNA.
1155	EXDL2	R1ML0 RFL0	R2ML+ RFL0	-0.0217218	0.245754	0.148521	0.709499	0.00127595	0.0380854	0.939503	0.0100856	0.0976241	ILMN_2728539	Mus musculus exonuclease 3''-5'' domain-like 2 (Exdl2), mRNA.
1156	EXDL2	R1ML0 RFL+	R2ML+ RFL+	-0.0414962	0.199456	0.182155	0.410529	0.00765485	0.0138717	0.849151	0.0385095	0.0443856	ILMN_2927225	Mus musculus exonuclease 3''-5'' domain-like 2 (Exdl2), mRNA.
1157	MAPK1	R1ML0 RFL+	R2ML+ RFL+	-0.0843308	0.30486	0.155643	0.121331	0.00024305	0.00060017	0.661717	0.00262865	0.00337841	ILMN_1213055
1158	A930025D01RIK	R1ML0 RFL+	R2ML0 RFL+	-0.0156992	0.0948246	0.246045	0.859057	0.0967979	0.00679865	0.972128	0.23753	0.0251555	ILMN_1232280	Mus musculus RIKEN cDNA A930025D01 gene (A930025D01Rik), mRNA.
1159	DOLPP1	R1ML0 RFL+	R2ML0 RFL+	0.0137519	0.154895	0.181223	0.840448	0.0134123	0.0127987	0.968025	0.057625	0.0415892	ILMN_2723338	Mus musculus dolichyl pyrophosphate phosphatase 1 (Dolpp1), mRNA.
1160	COPZ2	R1ML0 RFL+	R2ML+ RFL+	-0.012218	0.220044	0.236176	0.843579	0.00347055	0.0122841	0.968638	0.0213237	0.0403044	ILMN_1237090	Mus musculus coatomer protein complex, subunit zeta 2 (Copz2), mRNA.
1161	COPZ2	R1ML0 RFL+	R2ML0 RFL+	-0.161812	0.098807	0.4365	0.0607542	0.165757	0.00096031	0.57228	0.339425	0.00497925	ILMN_2647028	Mus musculus coatomer protein complex, subunit zeta 2 (Copz2), mRNA.
1162	COPZ2	R1ML0 RFL+	R2ML0 RFL+	-0.139256	0.112149	0.387658	0.140691	0.0616513	0.00203953	0.68341	0.173342	0.00929089	ILMN_2878274	Mus musculus coatomer protein complex, subunit zeta 2 (Copz2), mRNA.
1163	RXRG	R1ML0 RFL+	R2ML+ RFL+	-0.0534662	0.156272	0.321485	0.265521	0.00378426	0.00116129	0.771614	0.0228481	0.00581711	ILMN_1232561	Mus musculus retinoid X receptor gamma (Rxrg), mRNA.
1164	CUL7	R1ML0 RFL+	R2ML0 RFL+	-0.0243835	0.145307	0.32294	0.53451	0.0344773	7.909e-05	0.895392	0.11536	0.00062284	ILMN_2666690
1165	PET112L	R1ML0 RFL+	R2ML0 RFL+	-0.0863985	0.0634825	0.212003	0.326756	0.435806	0.00517616	0.809032	0.622468	0.0200561	ILMN_2901655	Mus musculus PET112-like (yeast) (Pet112l), mRNA.
1166	TMEM143	R1ML0 RFL+	R2ML0 RFL+	-0.156338	0.0382807	0.309685	0.0387241	0.407409	0.00020477	0.516506	0.597182	0.00137677	ILMN_2803344	Mus musculus transmembrane protein 143 (Tmem143), mRNA.
1167	TMEM143	R1ML0 RFL+	R2ML0 RFL+	-0.229248	0.0748947	0.196696	0.00902876	0.153802	0.00976232	0.353677	0.323425	0.0336728	ILMN_2731260	Mus musculus transmembrane protein 143 (Tmem143), mRNA.
1168	FDXR	R1ML0 RFL+	R2ML+ RFL+	0.027797	0.208035	0.301887	0.635148	0.00578988	0.00048272	0.923233	0.0314751	0.00282241	ILMN_2984012	Mus musculus ferredoxin reductase (Fdxr), mRNA.
1169	FDXR	R1ML0 RFL+	R2ML+ RFL+	-0.0116316	0.193535	0.190238	0.85959	0.00171094	0.00088222	0.972247	0.0125474	0.00463418	ILMN_1219942	Mus musculus ferredoxin reductase (Fdxr), mRNA.
1170	BC024139	R1ML0 RFL+	R2ML0 RFL+	-0.0186541	-0.0105351	0.269295	0.826645	0.928895	0.00383987	0.9652	0.96339	0.0156985	ILMN_2918509	Mus musculus cDNA sequence BC024139 (BC024139), mRNA.
1171	MAP1LC3A	R1ML0 RFL+	R2ML0 RFL+	0.0108271	0.228518	0.362173	0.938521	0.0985622	0.00022009	0.987519	0.240413	0.00146521	ILMN_2832682	Mus musculus microtubule-associated protein 1 light chain 3 alpha (Map1lc3a), mRNA.
1172	FXN	R1ML0 RFL+	R2ML0 RFL+	-0.0785564	0.0424912	0.17139	0.258316	0.544104	0.00060043	0.767571	0.712015	0.00337843	ILMN_3049455	Mus musculus frataxin (Fxn), mRNA.
1173	MRPL18	R1ML0 RFL+	R2ML0 RFL+	-0.0925564	0.192991	0.202554	0.174945	0.017211	0.00019643	0.705701	0.0693694	0.00133116	ILMN_2659762	Mus musculus mitochondrial ribosomal protein L18 (Mrpl18), mRNA.
1174	0610012D14RIK	R1ML0 RFL+	R2ML0 RFL+	0.0703459	0.120132	0.473208	0.469368	0.303589	0.0003343	0.873104	0.496615	0.00207901	ILMN_2848071	Mus musculus RIKEN cDNA 0610012D14 gene (0610012D14Rik), mRNA.
1175	SCLY	R1ML0 RFL+	R2ML+ RFL+	0.0568346	0.240596	0.41122	0.48782	0.00055979	0.0001183	0.880976	0.00516326	0.00087888	ILMN_2628281
1176	SMARCA2	R1ML0 RFL+	R2ML0 RFL+	-0.0210977	0.075307	0.210985	0.648684	0.282864	9.532e-05	0.926377	0.4753	0.00073012	ILMN_3075712	Mus musculus SWI/SNF related, matrix associated, actin dependent regulator of chromatin, subfamily a, member 2 (Smarca2), transcript variant 1, mRNA.
1177	AVEN	R1ML0 RFL+	R2ML0 RFL+	0.0719549	0.0863596	0.209369	0.346759	0.122149	0.0014166	0.818345	0.277506	0.00686321	ILMN_2919343	Mus musculus apoptosis, caspase activation inhibitor (Aven), mRNA.
1178	TMPRSS6	R1ML0 RFL+	R2ML0 RFL+	0.254617	0.237807	0.227679	0.00244535	0.0313669	0.00256702	0.240403	0.107716	0.0112529	ILMN_2469310
1179	TXN2	R1ML0 RFL+	R2ML0 RFL+	0.0295263	0.10986	0.242122	0.712297	0.2362	0.0035446	0.940136	0.424998	0.014696	ILMN_1257624	Mus musculus thioredoxin 2 (Txn2), mRNA.
1180	MAGIX	R1ML0 RFL+	R2ML0 RFL+	0.115692	0.26693	0.45272	0.306066	0.0444541	0.00012029	0.795671	0.138097	0.00089081	ILMN_2705203	Mus musculus PDZ domain containing, X chromosome (Pdzx), mRNA.
1181	RILP	R1ML0 RFL+	R2ML0 RFL+	0.0290977	0.0743596	0.267155	0.676523	0.486234	0.00146671	0.93224	0.665429	0.00706503	ILMN_1218228
1182	APBA3	R1ML0 RFL+	R2ML0 RFL+	-0.0706165	0.262693	0.445592	0.480246	0.0123079	1.5e-07	0.876952	0.0541849	3.47e-06	ILMN_2660110	Mus musculus amyloid beta (A4) precursor protein-binding, family A, member 3 (Apba3), mRNA.
1183	MRPS5	R1ML0 RFL+	R2ML0 RFL+	0.0148947	0.183895	0.362967	0.8525	0.0279814	6.6e-06	0.970973	0.098837	7.892e-05	ILMN_2780177	Mus musculus mitochondrial ribosomal protein S5 (Mrps5), mRNA.
1184	NUDT8	R1ML0 RFL+	R2ML0 RFL+	-0.0162556	0.117482	0.356932	0.857215	0.163049	2.78e-06	0.9716	0.335898	3.838e-05	ILMN_2617305	Mus musculus nudix (nucleoside diphosphate linked moiety X)-type motif 8 (Nudt8), mRNA.
1185	LRRC8	R1ML0 RFL+	R2ML0 RFL+	-0.00411278	0.182982	0.534705	0.973217	0.0653248	1.167e-05	0.99465	0.180617	0.00012617	ILMN_2744193	Mus musculus leucine rich repeat containing 8A (Lrrc8a), mRNA.
1186	OGFOD2	R1ML0 RFL+	R2ML0 RFL+	-0.0523459	0.135035	0.380065	0.493432	0.0263414	1.8e-07	0.882315	0.0944855	4.15e-06	ILMN_2732896	Mus musculus 2-oxoglutarate and iron-dependent oxygenase domain containing 2 (Ogfod2), mRNA.
1187	CYHR1	R1ML0 RFL+	R2ML0 RFL+	0.0604812	0.167719	0.296643	0.450424	0.0314752	1.117e-05	0.8662	0.107966	0.00012175	ILMN_2599521
1188	CYHR1	R1ML0 RFL+	R2ML0 RFL+	0.0499248	0.105544	0.271836	0.559105	0.220155	4.924e-05	0.901436	0.406097	0.00041768	ILMN_2599522
1189	SIGIRR	R1ML0 RFL+	R2ML0 RFL+	-0.00753383	-0.0337719	0.345646	0.939232	0.616564	4.1e-06	0.987983	0.767926	5.323e-05	ILMN_2673121
1190	TMEM53	R1ML0 RFL+	R2ML0 RFL+	0.0932481	0.0806053	0.507393	0.373522	0.185564	4e-08	0.834443	0.364735	1.08e-06	ILMN_2656884	Mus musculus transmembrane protein 53 (Tmem53), mRNA.
1191	ASPSCR1	R1ML0 RFL+	R2ML0 RFL+	-0.0253684	0.209298	0.268018	0.779375	0.0373106	0.00020542	0.955536	0.122121	0.00138041	ILMN_3156058	Mus musculus alveolar soft part sarcoma chromosome region, candidate 1 (human) (Aspscr1), transcript variant 2, mRNA.
1192	TMPRSS6	R1ML0 RFL+	R2ML0 RFL+	0.014812	0.296193	0.341202	0.879113	0.0204348	7.601e-05	0.976708	0.0783749	0.00060394	ILMN_1227763
1193	DSCR2	R1ML0 RFL+	R2ML+ RFL+	0.00493985	0.267535	0.395759	0.920266	0.00015015	2.93e-06	0.984927	0.00177825	3.997e-05	ILMN_2874662	Mus musculus Down syndrome critical region homolog 2 (human) (Dscr2), mRNA.
1194	WBSCR22	R1ML0 RFL+	R2ML+ RFL+	-0.0405714	0.193333	0.273494	0.477038	0.00134388	1.464e-05	0.875933	0.0104711	0.00015254	ILMN_1252719
1195	CYHR1	R1ML0 RFL+	R2ML0 RFL+	-0.0112932	0.122254	0.187324	0.825328	0.0374091	0.00042053	0.964851	0.122334	0.00252193	ILMN_2599527
1196	PLEKHA6	R1ML0 RFL+	R2ML0 RFL+	0.0279398	0.148368	0.316033	0.635818	0.0925425	0.00029889	0.923233	0.230143	0.00189119	ILMN_2870522	Mus musculus pleckstrin homology domain containing, family A member 6 (Plekha6), mRNA.
1197	GOLT1A	R1ML0 RFL+	R2ML0 RFL+	-0.0467368	0.10393	0.495741	0.640043	0.216911	3.641e-05	0.923957	0.402097	0.00032541	ILMN_1240839
1198	PCX	R1ML0 RFL+	R2ML0 RFL+	0.0520602	0.122465	0.499286	0.63292	0.159744	2e-07	0.922864	0.331463	4.37e-06	ILMN_2748361
1199	WIPI2	R1ML0 RFL+	R2ML0 RFL+	0.138556	0.163009	0.382244	0.164773	0.0813021	1.07e-06	0.699794	0.210649	1.754e-05	ILMN_2682516
1200	AU022252	R1ML0 RFL+	R2ML0 RFL+	-0.140398	-0.0146842	0.328622	0.245451	0.900885	0.00327362	0.760574	0.947995	0.0137432	ILMN_2893437	Mus musculus expressed sequence AU022252 (AU022252), mRNA.
1201	4833421E05RIK	R1ML0 RFL+	R2ML0 RFL+	0.105398	0.198351	0.407527	0.0729876	0.12395	7.653e-05	0.59373	0.280185	0.00060738	ILMN_2620804
1202	IAH1	R1ML0 RFL+	R2ML0 RFL+	0.0182857	0.126333	0.393187	0.702612	0.305914	7.291e-05	0.937643	0.499305	0.00058366	ILMN_2620803
1203	FXYD1	R1ML0 RFL+	R2ML0 RFL+	0.0982481	0.170272	0.438985	0.054344	0.0740564	0	0.55936	0.197328	5e-08	ILMN_2729342	Mus musculus FXYD domain-containing ion transport regulator 1 (Fxyd1), transcript variant 3, mRNA.
1204	9530027K23RIK	R1ML0 RFL+	R2ML0 RFL+	0.160857	0.270167	0.411568	0.096569	0.0207136	2.32e-05	0.635772	0.0791138	0.00022371	ILMN_1224254
1205	BC004044	R1ML0 RFL+	R2ML+ RFL+	0.0446842	0.238851	0.272372	0.478702	0.00608734	2.445e-05	0.876683	0.0326024	0.00023356	ILMN_2723024	Mus musculus cDNA sequence BC004044 (BC004044), mRNA.
1206	D430028G21RIK	R1ML0 RFL+	R2ML+ RFL+	0.113053	0.453219	0.530048	0.250764	7.711e-05	8.43e-06	0.763716	0.00101669	9.702e-05	ILMN_2596961	Mus musculus RIKEN cDNA D430028G21 gene (D430028G21Rik), mRNA.
1207	MLXIPL	R1ML0 RFL+	R2ML+ RFL+	0.192842	0.484175	0.526893	0.108289	0.00140284	0.00011988	0.6492	0.0108092	0.00088811	ILMN_2992232	Mus musculus MLX interacting protein-like (Mlxipl), mRNA.
1208	0610040J01RIK	R1ML0 RFL+	R2ML+ RFL+	-0.0302556	0.327816	0.417955	0.639846	0.00540021	1.23e-06	0.923957	0.0299071	1.968e-05	ILMN_2915716	Mus musculus RIKEN cDNA 0610040J01 gene (0610040J01Rik), mRNA.
1209	RASSF7	R1ML0 RFL+	R2ML0 RFL+	0.00311278	0.265018	0.403107	0.968061	0.0238823	2.964e-05	0.993491	0.0878865	0.00027407	ILMN_2778094
1210	RASSF7	R1ML0 RFL+	R2ML0 RFL+	-0.00481955	0.217561	0.372875	0.922318	0.0206111	9.5e-07	0.985123	0.0788897	1.596e-05	ILMN_2682778
1211	AMPD2	R1ML0 RFL+	R2ML+ RFL+	-0.00505263	0.292281	0.467509	0.929533	0.00256233	4e-08	0.98655	0.0169309	1.11e-06	ILMN_2701534	Mus musculus adenosine monophosphate deaminase 2 (isoform L) (Ampd2), mRNA.
1212	WWC1	R1ML0 RFL+	R2ML0 RFL+	-0.0270902	0.144053	0.586637	0.760826	0.137652	5.91e-06	0.951762	0.300428	7.197e-05	ILMN_2525423
1213	WWC1	R1ML0 RFL+	R2ML0 RFL+	-0.101263	0.141237	0.520372	0.185276	0.199953	7.9e-07	0.711984	0.382562	1.365e-05	ILMN_2898637	Mus musculus WW, C2 and coiled-coil domain containing 1 (Wwc1), mRNA.
1214	BC004044	R1ML0 RFL+	R2ML+ RFL+	0.0496165	0.187307	0.430467	0.278142	0.0108744	1e-08	0.780572	0.04959	4.7e-07	ILMN_1240719	Mus musculus cDNA sequence BC004044 (BC004044), mRNA.
1215	DAPK2	R1ML0 RFL+	R2ML+ RFL+	0.0539323	0.254289	0.325824	0.314315	7.98e-06	6.2e-07	0.80039	0.00015232	1.118e-05	ILMN_2669333	Mus musculus death-associated kinase 2 (Dapk2), mRNA.
1216	DPM3	R1ML0 RFL+	R2ML+ RFL+	-0.0254586	0.235684	0.297521	0.665146	0.00635672	1.566e-05	0.929977	0.0335901	0.00016134	ILMN_1248860
1217	GCKR	R1ML0 RFL+	R2ML0 RFL+	0.0729098	0.0962193	0.463664	0.405747	0.342264	1.897e-05	0.847886	0.535734	0.00018925	ILMN_2710811
1218	SLC26A1	R1ML0 RFL+	R2ML0 RFL+	-0.0505113	0.135632	0.542747	0.671362	0.13643	2.3e-06	0.930257	0.298675	3.298e-05	ILMN_2959748	Mus musculus solute carrier family 26 (sulfate transporter), member 1 (Slc26a1), mRNA.
1219	TLE2	R1ML0 RFL+	R2ML0 RFL+	0.0621353	0.149588	0.248604	0.283315	0.183666	2.539e-05	0.783394	0.362243	0.00024101	ILMN_1250103
1220	CUL4A	R1ML0 RFL+	R2ML+ RFL+	0.0628872	0.297982	0.337908	0.283395	0.00276418	0.00014287	0.783475	0.0179644	0.00102639	ILMN_2956895	Mus musculus cullin 4A (Cul4a), mRNA.
1221	IRF2BP1	R1ML0 RFL+	R2ML+ RFL+	0.00407519	0.255956	0.364729	0.928522	0.00216249	2.577e-05	0.986245	0.0150269	0.00024356	ILMN_1228568	Mus musculus interferon regulatory factor 2 binding protein 1 (Irf2bp1), mRNA.
1222	2010007H12RIK	R1ML0 RFL+	R2ML+ RFL+	-0.0793985	0.210482	0.299295	0.310817	0.00886667	0.00010077	0.799176	0.0427339	0.00076519	ILMN_1227103	Mus musculus RIKEN cDNA 2010007H12 gene (2010007H12Rik), mRNA.
1223	SNRPA	R1ML0 RFL+	R2ML+ RFL+	-0.0368421	0.238825	0.292946	0.593178	3.712e-05	2.38e-06	0.90883	0.00055361	3.385e-05	ILMN_2667509
1224	INTS1	R1ML0 RFL+	R2ML0 RFL+	-0.00393233	0.130377	0.158571	0.965144	0.00279621	0.00057452	0.992961	0.0181175	0.00325617	ILMN_1222829	Mus musculus integrator complex subunit 1 (Ints1), mRNA.
1225	2610003J06RIK	R1ML0 RFL+	R2ML+ RFL+	0.0812782	0.298421	0.565101	0.344599	0.00465059	1.14e-06	0.817352	0.026789	1.851e-05	ILMN_2896492	Mus musculus RIKEN cDNA 2610003J06 gene (2610003J06Rik), mRNA.
1226	NUDT1	R1ML0 RFL+	R2ML+ RFL+	0.145579	0.375746	0.446732	0.0766031	7.72e-06	2.45e-06	0.601979	0.00014818	3.471e-05	ILMN_2880623	Mus musculus nudix (nucleoside diphosphate linked moiety X)-type motif 1 (Nudt1), mRNA.
1227	MRPS21	R1ML0 RFL+	R2ML+ RFL+	0.0755113	0.284202	0.287949	0.262456	0.00010611	0.00070119	0.768592	0.0013308	0.00383292	ILMN_2745555	Mus musculus mitochondrial ribosomal protein S21 (Mrps21), mRNA.
1228	PRKACA	R1ML0 RFL+	R2ML+ RFL+	0.0624436	0.339158	0.313839	0.331993	0.00049641	0.00317399	0.811289	0.00469401	0.013406	ILMN_2833376	Mus musculus protein kinase, cAMP dependent, catalytic, alpha (Prkaca), mRNA.
1229	TJP3	R1ML0 RFL+	R2ML+ RFL+	0.148797	0.337868	0.307952	0.0879863	0.00219289	0.0013874	0.621574	0.0151684	0.00674846	ILMN_2723523
1230	TJP3	R1ML0 RFL+	R2ML+ RFL+	0.0512932	0.352412	0.265839	0.569107	0.00475731	0.00975631	0.902475	0.0271966	0.0336566	ILMN_2723524
1231	ADRA1B	R1ML0 RFL+	R2ML0 RFL+	0.103045	0.196307	0.232634	0.12262	0.0123567	0.00032268	0.664059	0.0543623	0.00201998	ILMN_2606415
1232	CYB5R3	R1ML0 RFL+	R2ML+ RFL+	0.143609	0.465561	0.542798	0.198787	0.00036522	0.00011747	0.722918	0.00366317	0.00087423	ILMN_2904686	Mus musculus cytochrome b5 reductase 3 (Cyb5r3), mRNA.
1233	SHMT1	R1ML0 RFL+	R2ML0 RFL+	0.0731203	0.341763	0.677723	0.567018	0.0520165	0.0005763	0.90235	0.153666	0.00326263	ILMN_2726055
1234	THNSL2	R1ML0 RFL+	R2ML+ RFL+	0.15709	0.394614	0.474914	0.0609093	0.00294773	0.00052599	0.57228	0.018809	0.00303123	ILMN_3147331	Mus musculus threonine synthase-like 2 (bacterial) (Thnsl2), transcript variant 2, mRNA.
1235	THNSL2	R1ML0 RFL+	R2ML0 RFL+	0.0737218	0.300746	0.331735	0.340577	0.0175408	0.0117656	0.815335	0.0703741	0.039042	ILMN_2773485
1236	PEPD	R1ML0 RFL+	R2ML+ RFL+	-0.0532707	0.249658	0.417262	0.48752	0.00051045	8.09e-06	0.880976	0.00479773	9.389e-05	ILMN_2743831	Mus musculus peptidase D (Pepd), mRNA.
1237	STAT5A	R1ML0 RFL+	R2ML+ RFL+	0.0593534	0.247544	0.459158	0.3857	1.013e-05	1.054e-05	0.839159	0.00018601	0.00011617	ILMN_2976191	Mus musculus signal transducer and activator of transcription 5A (Stat5a), mRNA.
1238	BCL9L	R1ML0 RFL+	R2ML0 RFL+	-0.0184737	0.093693	0.663542	0.875557	0.32672	0	0.976038	0.520497	4e-08	ILMN_1250469
1239	NAT6	R1ML0 RFL+	R2ML0 RFL+	0.157541	0.239518	0.419012	0.194276	0.0753362	1.055e-05	0.721535	0.199764	0.00011619	ILMN_2905859	Mus musculus N-acetyltransferase 6 (Nat6), mRNA.
1240	NAT6	R1ML0 RFL+	R2ML0 RFL+	0.00909774	0.16436	0.432369	0.890022	0.0819113	1e-08	0.979355	0.211843	4.5e-07	ILMN_2708415	Mus musculus N-acetyltransferase 6 (Nat6), mRNA.
1241	RFNG	R1ML0 RFL+	R2ML0 RFL+	0.0758195	0.162939	0.311565	0.174952	0.0161983	0	0.705701	0.0663341	1.1e-07	ILMN_1257829
1242	PEX26	R1ML0 RFL+	R2ML0 RFL+	0.10218	0.133895	0.411515	0.0684975	0.0200038	2.382e-05	0.58494	0.0773454	0.00022866	ILMN_2652077
1243	1110038F14RIK	R1ML0 RFL+	R2ML0 RFL+	0.0108421	0.147009	0.260018	0.799253	0.00546337	0	0.960421	0.0301789	4e-08	ILMN_2629375	Mus musculus RIKEN cDNA 1110038F14 gene (1110038F14Rik), mRNA.
1244	BCKDK	R1ML0 RFL+	R2ML+ RFL+	-0.0685038	0.197877	0.370182	0.191327	0.00449257	1.1e-07	0.718475	0.0260894	2.84e-06	ILMN_1249301
1245	BCKDK	R1ML0 RFL+	R2ML+ RFL+	-0.0692406	0.160974	0.360408	0.341842	0.00187643	1.05e-05	0.816052	0.0134764	0.00011585	ILMN_2648746
1246	CBARA1	R1ML0 RFL+	R2ML0 RFL+	-0.0288346	0.21057	0.383693	0.61443	0.0153925	0	0.916621	0.0638786	0	ILMN_2686513
1247	NUMA1	R1ML0 RFL+	R2ML+ RFL+	0.0288722	0.196158	0.337363	0.570962	0.00012767	0	0.903194	0.00156005	0	ILMN_2735625	Mus musculus nuclear mitotic apparatus protein 1 (Numa1), mRNA.
1248	COPS7A	R1ML0 RFL+	R2ML+ RFL+	-0.022406	0.355737	0.377476	0.691779	4.153e-05	7.1e-07	0.934384	0.00060499	1.25e-05	ILMN_2875812	Mus musculus COP9 (constitutive photomorphogenic) homolog, subunit 7a (Arabidopsis thaliana) (Cops7a), mRNA.
1249	LSM2	R1ML0 RFL+	R2ML+ RFL+	0.0852406	0.35036	0.330396	0.11687	0.00044608	1e-08	0.6586	0.00431586	2.7e-07	ILMN_2741726	Mus musculus LSM2 homolog, U6 small nuclear RNA associated (S. cerevisiae) (Lsm2), mRNA.
1250	1190003J15RIK	R1ML0 RFL+	R2ML0 RFL+	-0.00878195	0.134123	0.250158	0.882763	0.0302172	0.00047648	0.977312	0.104677	0.00279418	ILMN_2734924
1251	MRPL46	R1ML0 RFL+	R2ML0 RFL+	-0.0820752	0.0743772	0.341946	0.28893	0.266675	3.25e-06	0.78746	0.459269	4.368e-05	ILMN_2740922	Mus musculus mitochondrial ribosomal protein L46 (Mrpl46), mRNA.
1252	PIH1D1	R1ML0 RFL+	R2ML0 RFL+	0.00115038	0.128079	0.294051	0.981165	0.0206714	0.00012567	0.9966	0.0789997	0.00092368	ILMN_2806124	Mus musculus PIH1 domain containing 1 (Pih1d1), mRNA.
1253	ASGR1	R1ML0 RFL+	R2ML0 RFL+	0.0735714	0.0961667	0.33922	0.165961	0.0236428	0.00051436	0.699794	0.0872665	0.00297355	ILMN_2608703
1254	KARS	R1ML0 RFL+	R2ML+ RFL+	0.0108496	0.324754	0.301131	0.802954	9.431e-05	3.326e-05	0.961171	0.00120394	0.00030214	ILMN_2606848	Mus musculus lysyl-tRNA synthetase (Kars), mRNA.
1255	ZER1	R1ML0 RFL+	R2ML+ RFL+	0.11897	0.272518	0.373152	0.079277	0.00015294	0.00339836	0.607872	0.00180284	0.0141858	ILMN_1227218	Mus musculus zer-1 homolog (C. elegans) (Zer1), mRNA.
1256	UGT1A10	R1ML0 RFL+	R2ML0 RFL+	-0.097	0.174833	0.347827	0.451582	0.042997	0.00090309	0.866754	0.134815	0.00473027	ILMN_2930203	Mus musculus UDP glycosyltransferase 1 family, polypeptide A10 (Ugt1a10), mRNA.
1257	WBSCR22	R1ML0 RFL+	R2ML+ RFL+	-0.0762932	0.226421	0.306604	0.384775	0.00202844	6.468e-05	0.839159	0.0143248	0.00052715	ILMN_2478874
1258	WBSCR22	R1ML0 RFL+	R2ML+ RFL+	0.0225338	0.286605	0.312518	0.763969	0.00013346	0.00045075	0.952042	0.00161693	0.00267383	ILMN_1250081
1259	5930434B04RIK	R1ML0 RFL+	R2ML+ RFL+	-0.0186917	0.15107	0.296393	0.726008	0.00314647	2.21e-06	0.942708	0.0197593	3.204e-05	ILMN_3149218	Mus musculus RIKEN cDNA 5930434B04 gene (5930434B04Rik), mRNA.
1260	BOLA1	R1ML0 RFL+	R2ML+ RFL+	-0.0778346	0.247404	0.375131	0.393229	0.00768435	2.312e-05	0.843508	0.0386256	0.00022315	ILMN_2640140
1261	MTX1	R1ML0 RFL+	R2ML+ RFL+	-0.0101278	0.181825	0.394345	0.868601	0.00670113	8e-08	0.974843	0.0348934	2.15e-06	ILMN_2972149	Mus musculus metaxin 1 (Mtx1), mRNA.
1262	ICT1	R1ML0 RFL+	R2ML+ RFL+	-0.00117293	0.256851	0.373836	0.987104	6.621e-05	1.011e-05	0.99795	0.00088979	0.00011255	ILMN_2642063	Mus musculus immature colon carcinoma transcript 1 (Ict1), mRNA.
1263	C030006K11RIK	R1ML0 RFL+	R2ML0 RFL+	-0.0311353	0.156079	0.550128	0.715646	0.0207318	1.44e-06	0.940943	0.0791715	2.241e-05	ILMN_2692853	Mus musculus RIKEN cDNA C030006K11 gene (C030006K11Rik), mRNA.
1264	MTCH1	R1ML0 RFL+	R2ML0 RFL+	-0.041	0.1685	0.29644	0.593163	0.0203967	0.00025448	0.90883	0.0782758	0.00165261	ILMN_2708297
1265	STARD10	R1ML0 RFL+	R2ML0 RFL+	-0.038406	0.12257	0.375875	0.739165	0.202642	0.00062616	0.946455	0.386241	0.00350389	ILMN_2625601
1266	PRNPIP1	R1ML0 RFL+	R2ML0 RFL+	-0.0213609	0.121544	0.28417	0.680257	0.00041378	3.503e-05	0.93224	0.00406151	0.00031529	ILMN_1212720	Mus musculus prion protein interacting protein 1 (Prnpip1), mRNA.
1267	NUDT19	R1ML0 RFL+	R2ML+ RFL+	-0.0975263	0.26664	0.34364	0.0507221	0.00127783	0.00086341	0.551182	0.0100911	0.00455023	ILMN_2746906
1268	SHF	R1ML0 RFL+	R2ML+ RFL+	0.0777669	0.285553	0.411497	0.0597814	0.00221558	0.00016735	0.569808	0.0152925	0.00116729	ILMN_3029727	Mus musculus Src homology 2 domain containing F (Shf), mRNA.
1269	CTF1	R1ML0 RFL+	R2ML0 RFL+	-0.021015	0.0763421	0.264274	0.696262	0.0363544	0.00038404	0.935482	0.119969	0.00233689	ILMN_2678336	Mus musculus cardiotrophin 1 (Ctf1), mRNA.
1270	MRPL2	R1ML0 RFL+	R2ML+ RFL+	-0.0708496	0.201912	0.30436	0.176638	0.00320638	0.00065173	0.707954	0.0200393	0.00362342	ILMN_2842366	Mus musculus mitochondrial ribosomal protein L2 (Mrpl2), mRNA.
1271	TIMM50	R1ML0 RFL+	R2ML0 RFL+	-0.0364586	0.138018	0.311738	0.451405	0.0248879	0.0009386	0.866754	0.0906384	0.00488361	ILMN_1241845	Mus musculus translocase of inner mitochondrial membrane 50 homolog (yeast) (Timm50), mRNA.
1272	D8ERTD738E	R1ML0 RFL+	R2ML0 RFL+	-0.0279699	0.206816	0.535878	0.737087	0.0239978	1.1e-07	0.945877	0.0882346	2.79e-06	ILMN_2820559	Mus musculus DNA segment, Chr 8, ERATO Doi 738, expressed (D8Ertd738e), mRNA.
1273	LOC100044294	R1ML0 RFL+	R2ML0 RFL+	-0.0658271	0.205649	0.541765	0.359189	0.0151463	0	0.825071	0.0631535	1.1e-07	ILMN_1234172
1274	RABAC1	R1ML0 RFL+	R2ML0 RFL+	-0.0682707	0.140825	0.527935	0.488658	0.186667	5e-08	0.881381	0.365887	1.32e-06	ILMN_1244857
1275	KEAP1	R1ML0 RFL+	R2ML+ RFL+	-0.0822556	0.218149	0.555024	0.120663	0.00769139	3.757e-05	0.661127	0.0386404	0.00033394	ILMN_1258406	Mus musculus kelch-like ECH-associated protein 1 (Keap1), mRNA.
1276	POLR2F	R1ML0 RFL+	R2ML0 RFL+	-0.131662	0.150553	0.558771	0.0728828	0.0146052	2.3e-07	0.59373	0.0614052	4.9e-06	ILMN_1237750
1277	UBAP2	R1ML0 RFL+	R2ML+ RFL+	-0.0553158	0.228018	0.485521	0.287028	0.00093172	1.302e-05	0.786921	0.00779988	0.00013802	ILMN_2491654	Mus musculus ubiquitin-associated protein 2 (Ubap2), mRNA.
1278	THOC4	R1ML0 RFL+	R2ML0 RFL+	-0.0979549	0.26114	0.414301	0.175967	0.0283325	1.7e-07	0.706914	0.0997751	3.93e-06	ILMN_2617245	Mus musculus THO complex 4 (Thoc4), mRNA.
1279	ZMAT5	R1ML0 RFL+	R2ML+ RFL+	-0.0999023	0.216693	0.288357	0.114784	0.0017856	2.4e-06	0.656921	0.0129617	3.416e-05	ILMN_2690772	Mus musculus zinc finger, matrin type 5 (Zmat5), mRNA.
1280	OTUB1	R1ML0 RFL+	R2ML0 RFL+	-0.0350902	0.116386	0.386265	0.433932	0.0374783	8e-08	0.859933	0.122498	2.1e-06	ILMN_3127375
1281	2310003C23RIK	R1ML0 RFL+	R2ML+ RFL+	0.0328496	0.319588	0.518765	0.598273	6.5e-07	0	0.910554	1.682e-05	0	ILMN_1244393
1282	2610036D13RIK	R1ML0 RFL+	R2ML+ RFL+	0.0460827	0.390035	0.386869	0.444264	2e-08	0	0.863792	8.8e-07	0	ILMN_1234604	Mus musculus RIKEN cDNA 2610036D13 gene (2610036D13Rik), mRNA.
1283	DRG2	R1ML0 RFL+	R2ML+ RFL+	0.0634511	0.29707	0.405676	0.409773	8.41e-06	0	0.849151	0.00015898	1e-08	ILMN_2677494	Mus musculus developmentally regulated GTP binding protein 2 (Drg2), mRNA.
1284	HGS	R1ML0 RFL+	R2ML+ RFL+	0.0277519	0.268728	0.547649	0.749784	0.00137179	0	0.948235	0.0106113	0	ILMN_2855397	Mus musculus HGF-regulated tyrosine kinase substrate (Hgs), mRNA.
1285	EIF2B5	R1ML0 RFL+	R2ML+ RFL+	0.0473759	0.353614	0.450818	0.535015	3.991e-05	0	0.895515	0.00058803	3e-08	ILMN_2715215	Mus musculus eukaryotic translation initiation factor 2B, subunit 5 epsilon (Eif2b5), mRNA.
1286	NAT15	R1ML0 RFL+	R2ML+ RFL+	0.0807368	0.396404	0.321449	0.307564	0.0001185	2e-08	0.796636	0.00146789	5.7e-07	ILMN_1244030	Mus musculus RIKEN cDNA 1200013P24 gene (1200013P24Rik), mRNA.
1287	USP5	R1ML0 RFL+	R2ML+ RFL+	0.0265639	0.321421	0.302274	0.678835	3.686e-05	0	0.93224	0.00055102	1.1e-07	ILMN_1253666	Mus musculus ubiquitin specific peptidase 5 (isopeptidase T) (Usp5), mRNA.
1288	BUB3	R1ML0 RFL+	R2ML+ RFL+	-0.0495338	0.186728	0.265015	0.367771	0.00012732	0	0.830482	0.00155643	1e-07	ILMN_2655944	Mus musculus budding uninhibited by benzimidazoles 3 homolog (S. cerevisiae) (Bub3), mRNA.
1289	GTPBP1	R1ML0 RFL+	R2ML+ RFL+	-0.0333609	0.168877	0.310408	0.461503	0.00653855	0	0.871386	0.034262	0	ILMN_2510196
1290	ELAC2	R1ML0 RFL+	R2ML+ RFL+	0.0823459	0.261798	0.351836	0.13726	0.00123279	0	0.679718	0.00979262	4e-08	ILMN_2859678	Mus musculus elaC homolog 2 (E. coli) (Elac2), mRNA.
1291	GNPAT	R1ML0 RFL+	R2ML+ RFL+	0.0871053	0.371439	0.396488	0.119095	3.9e-07	0	0.660071	1.052e-05	7e-08	ILMN_2605941	Mus musculus glyceronephosphate O-acyltransferase (Gnpat), mRNA.
1292	GPR137	R1ML0 RFL+	R2ML+ RFL+	0.0250301	0.335649	0.389238	0.668244	0.00033309	1.3e-07	0.929977	0.00340465	3.22e-06	ILMN_2780876	Mus musculus G protein-coupled receptor 137 (Gpr137), mRNA.
1293	RNF123	R1ML0 RFL+	R2ML0 RFL+	0.0439248	0.164211	0.365768	0.21159	0.0133391	3.7e-07	0.732404	0.0573968	7.34e-06	ILMN_2975900	Mus musculus ring finger protein 123 (Rnf123), mRNA.
1294	AA409316	R1ML0 RFL+	R2ML0 RFL+	0.159256	0.147351	0.379176	0.101412	0.0144507	3e-08	0.641462	0.0608853	8.2e-07	ILMN_2743155	Mus musculus expressed sequence AA409316 (AA409316), mRNA.
1295	ARFGAP2	R1ML0 RFL+	R2ML+ RFL+	0.149226	0.291202	0.551339	0.177886	0.00519566	0	0.70934	0.0290119	5e-08	ILMN_1241481	Mus musculus zinc finger protein 289 (Zfp289), mRNA.
1296	FKBP8	R1ML0 RFL+	R2ML0 RFL+	0.136549	0.183096	0.490274	0.21612	0.0189876	1.34e-06	0.736816	0.0744015	2.111e-05	ILMN_2656677	Mus musculus FK506 binding protein 8 (Fkbp8), mRNA.
1297	AFG3L2	R1ML0 RFL+	R2ML+ RFL+	-0.0320301	0.225851	0.399887	0.510711	0.0083482	1e-08	0.889434	0.0409397	3e-07	ILMN_2691982
1298	D0H8S2298E	R1ML0 RFL+	R2ML+ RFL+	0.0775789	0.216246	0.326262	0.0818213	0.0106554	1.6e-07	0.610833	0.04886	3.81e-06	ILMN_2726714
1299	SLC25A39	R1ML0 RFL+	R2ML+ RFL+	0.177256	0.213518	0.460699	0.0581124	0.00469375	4e-08	0.567645	0.0269351	1.2e-06	ILMN_2855261	Mus musculus solute carrier family 25, member 39 (Slc25a39), mRNA.
1300	SGTA	R1ML0 RFL+	R2ML0 RFL+	0.0207143	0.0891667	0.322515	0.722703	0.143372	0	0.942708	0.308795	1.9e-07	ILMN_1242694	Mus musculus small glutamine-rich tetratricopeptide repeat (TPR)-containing, alpha (Sgta), mRNA.
1301	KLHDC4	R1ML0 RFL+	R2ML+ RFL+	0.0334586	0.244816	0.389631	0.617756	7.1e-07	1e-08	0.917539	1.824e-05	2.4e-07	ILMN_2856166	Mus musculus kelch domain containing 4 (Klhdc4), mRNA.
1302	SKIV2L	R1ML0 RFL+	R2ML0 RFL+	0.0691504	0.106079	0.353583	0.252659	0.0497178	1e-08	0.764815	0.149113	2.3e-07	ILMN_2748317
1303	WDR24	R1ML0 RFL+	R2ML+ RFL+	0.0407444	0.197316	0.287464	0.386238	1.368e-05	1e-08	0.839407	0.00023994	3e-07	ILMN_1213899	Mus musculus WD repeat domain 24 (Wdr24), mRNA.
1304	BC021790	R1ML0 RFL+	R2ML0 RFL+	0.0522556	0.0531842	0.28056	0.298392	0.186282	0	0.792544	0.365473	2e-08	ILMN_1251519
1305	IRF3	R1ML0 RFL+	R2ML+ RFL+	0.17382	0.150105	0.342068	0.0353003	0.0098967	1.14e-06	0.502277	0.0464164	1.853e-05	ILMN_1229320
1306	SCAMP3	R1ML0 RFL+	R2ML0 RFL+	-0.0145865	0.0611754	0.349994	0.843928	0.337336	0	0.968657	0.530903	3e-08	ILMN_1245139
1307	SRP68	R1ML0 RFL+	R2ML+ RFL+	0.0548421	0.225509	0.293574	0.388834	0.00160801	0	0.841265	0.011998	2e-08	ILMN_2599897
1308	AP2S1	R1ML0 RFL+	R2ML0 RFL+	-0.0310226	0.15043	0.297679	0.449842	0.0138464	5e-08	0.866147	0.0590457	1.53e-06	ILMN_2911283	Mus musculus adaptor-related protein complex 2, sigma 1 subunit (Ap2s1), mRNA.
1309	LOC100044576	R1ML0 RFL+	R2ML+ RFL+	0.0127669	0.168886	0.382455	0.770808	0.00705897	0	0.953967	0.0362669	3e-08	ILMN_2625342
1310	ARL6IP4	R1ML0 RFL+	R2ML0 RFL+	0.0412406	0.0670263	0.489423	0.371159	0.150107	0	0.83284	0.318367	6e-08	ILMN_3034691	Mus musculus ADP-ribosylation factor-like 6 interacting protein 4 (Arl6ip4), mRNA.
1311	FIS1	R1ML0 RFL+	R2ML+ RFL+	-0.0066391	0.195956	0.351875	0.912486	0.00866015	8e-08	0.983556	0.0420362	2.08e-06	ILMN_2939294	Mus musculus fission 1 (mitochondrial outer membrane) homolog (yeast) (Fis1), mRNA.
1312	AFG3L1	R1ML0 RFL+	R2ML0 RFL+	-0.0423609	0.177377	0.497827	0.53891	0.0314775	6e-08	0.895515	0.107966	1.73e-06	ILMN_1252760
1313	AFG3L1	R1ML0 RFL+	R2ML0 RFL+	-0.0685489	0.183404	0.471994	0.292757	0.0300478	1.5e-07	0.788438	0.104244	3.51e-06	ILMN_2665422
1314	ANKRD40	R1ML0 RFL+	R2ML0 RFL+	-0.0111955	0.177281	0.327494	0.906097	0.0550918	3.275e-05	0.983136	0.160201	0.00029847	ILMN_2681592
1315	BC021381	R1ML0 RFL+	R2ML0 RFL+	0.0195489	0.168763	0.322735	0.731462	0.0843702	5e-08	0.944026	0.216072	1.51e-06	ILMN_2760765
1316	PIGT	R1ML0 RFL+	R2ML0 RFL+	0.0553008	0.333158	0.526054	0.610493	0.0129261	7.2e-07	0.91521	0.0562416	1.269e-05	ILMN_2868131	Mus musculus phosphatidylinositol glycan anchor biosynthesis, class T (Pigt), mRNA. XM_922599
1317	VAPB	R1ML0 RFL+	R2ML+ RFL+	-0.132955	0.290474	0.38233	0.112686	0.00624198	9.91e-06	0.656141	0.0331885	0.00011089	ILMN_2506144
1318	CPSF1	R1ML0 RFL+	R2ML+ RFL+	0.0257744	0.184132	0.271836	0.433559	0.0002197	3e-08	0.859914	0.00241684	9.7e-07	ILMN_3062133	Mus musculus cleavage and polyadenylation specific factor 1 (Cpsf1), mRNA.
1319	HDAC5	R1ML0 RFL+	R2ML+ RFL+	0.105113	0.309518	0.424732	0.124227	0.00131905	1e-08	0.6645	0.0103372	3.1e-07	ILMN_2659160
1320	LCMT1	R1ML0 RFL+	R2ML+ RFL+	0.0809624	0.284605	0.505512	0.304644	0.00019094	4e-08	0.794646	0.00215862	1.27e-06	ILMN_2943476	Mus musculus leucine carboxyl methyltransferase 1 (Lcmt1), mRNA.
1321	RAVER1	R1ML0 RFL+	R2ML+ RFL+	-0.00300752	0.201921	0.303914	0.93401	0.0002836	0	0.986921	0.00298535	1.4e-07	ILMN_1216883
1322	SLC39A7	R1ML0 RFL+	R2ML+ RFL+	0.133173	0.236816	0.456634	0.104716	0.00010026	1.8e-07	0.646747	0.00126931	4.15e-06	ILMN_2603540
1323	4930511J11RIK	R1ML0 RFL+	R2ML0 RFL+	0.0336541	0.0667018	0.19125	0.147419	0.266984	6.88e-06	0.68589	0.459647	8.189e-05	ILMN_2675000
1324	HIPK2	R1ML0 RFL+	R2ML+ RFL+	0.0609474	0.207947	0.370354	0.343	0.00224832	5.3e-07	0.816192	0.0154314	9.86e-06	ILMN_2705324	Mus musculus homeodomain interacting protein kinase 2 (Hipk2), mRNA.
1325	EFTUD1	R1ML0 RFL+	R2ML0 RFL+	0.0601353	0.220754	0.266015	0.167761	0.0168779	1.882e-05	0.700884	0.0683332	0.00018794	ILMN_1223140	Mus musculus elongation factor Tu GTP binding domain containing 1 (Eftud1), mRNA.
1326	HNRNPH3	R1ML0 RFL+	R2ML0 RFL+	-0.0255038	0.175877	0.257027	0.640536	0.086464	0.00013113	0.923985	0.219704	0.00095782	ILMN_2958912	Mus musculus heterogeneous nuclear ribonucleoprotein H3 (Hnrph3), mRNA.
1327	SMARCC2	R1ML0 RFL+	R2ML0 RFL+	0.0795639	0.170254	0.434619	0.448338	0.128758	4.1e-07	0.865398	0.287637	7.84e-06	ILMN_2598571	Mus musculus SWI/SNF related, matrix associated, actin dependent regulator of chromatin, subfamily c, member 2 (Smarcc2), mRNA.
1328	TSSC4	R1ML0 RFL+	R2ML0 RFL+	0.0373233	0.172061	0.217884	0.652849	0.0167363	4.75e-06	0.926748	0.0678992	6.013e-05	ILMN_2460043	Mus musculus tumor-suppressing subchromosomal transferable fragment 4 (Tssc4), transcript variant 2, mRNA.
1329	2900026A02RIK	R1ML0 RFL+	R2ML+ RFL+	-0.0155489	0.157904	0.197214	0.572224	0.00720691	1.18e-06	0.903796	0.0368329	1.897e-05	ILMN_1251935
1330	BAHCC1	R1ML0 RFL+	R2ML+ RFL+	0.0605188	0.217614	0.306815	0.259706	0.00258746	5.07e-06	0.768153	0.0170618	6.343e-05	ILMN_1242613
1331	PHKA2	R1ML0 RFL+	R2ML+ RFL+	0.0501353	0.166921	0.317801	0.196646	0.00465506	2e-08	0.722352	0.0267909	7.4e-07	ILMN_2725082	Mus musculus phosphorylase kinase alpha 2 (Phka2), mRNA.
1332	DNAJC4	R1ML0 RFL+	R2ML+ RFL+	0.0239023	0.22664	0.198664	0.670484	0.00159231	0.00048987	0.929977	0.0119074	0.00286033	ILMN_2646976	Mus musculus DnaJ (Hsp40) homolog, subfamily C, member 4 (Dnajc4), mRNA.
1333	2310007F21RIK	R1ML0 RFL+	R2ML+ RFL+	0.0758797	0.472737	0.466301	0.413868	0	0	0.851563	0	5e-08	ILMN_1238583
1334	A730008L03RIK	R1ML0 RFL+	R2ML+ RFL+	-0.0458346	0.329737	0.417821	0.31588	0.00011982	0	0.801324	0.00148031	0	ILMN_2655803	Mus musculus RIKEN cDNA A730008L03 gene (A730008L03Rik), mRNA.
1335	A730008L03RIK	R1ML0 RFL+	R2ML+ RFL+	0.0409248	0.392211	0.512542	0.476615	2.545e-05	0	0.875933	0.00040513	6e-08	ILMN_2873174	Mus musculus RIKEN cDNA A730008L03 gene (A730008L03Rik), mRNA.
1336	CPSF3L	R1ML0 RFL+	R2ML+ RFL+	-0.0335564	0.240991	0.383113	0.377049	0.00213176	0	0.835724	0.0148455	9e-08	ILMN_1249116	Mus musculus cleavage and polyadenylation specific factor 3-like (Cpsf3l), mRNA.
1337	RUVBL1	R1ML0 RFL+	R2ML+ RFL+	-0.101436	0.235921	0.38053	0.0138332	0.00168064	0	0.391659	0.0123853	1e-08	ILMN_2666487	Mus musculus RuvB-like protein 1 (Ruvbl1), mRNA.
1338	ANAPC7	R1ML0 RFL+	R2ML+ RFL+	0.0132857	0.2515	0.349512	0.779109	1.134e-05	4.1e-07	0.955536	0.00020416	7.94e-06	ILMN_2870688	Mus musculus anaphase promoting complex subunit 7 (Anapc7), mRNA.
1339	SART1	R1ML0 RFL+	R2ML+ RFL+	0.0819549	0.298193	0.427467	0.0959624	0.00112547	0	0.635068	0.00908328	1e-08	ILMN_1254793
1340	SMG6	R1ML0 RFL+	R2ML+ RFL+	0.0624662	0.222728	0.376976	0.108736	0.00019511	6e-08	0.6492	0.00219804	1.64e-06	ILMN_3160556	Mus musculus Smg-6 homolog, nonsense mediated mRNA decay factor (C. elegans) (Smg6), mRNA.
1341	SF1	R1ML0 RFL+	R2ML+ RFL+	0.0230827	0.300535	0.458598	0.764236	0.00031131	9e-08	0.952173	0.00321657	2.28e-06	ILMN_2449335	Mus musculus splicing factor 1 (Sf1), mRNA. XM_979946 XM_979979
1342	DALRD3	R1ML0 RFL+	R2ML0 RFL+	0.074	0.187333	0.503045	0.377199	0.0128467	1e-08	0.835724	0.0559762	4.8e-07	ILMN_2644238
1343	DIABLO	R1ML0 RFL+	R2ML+ RFL+	0.0306241	0.198719	0.420696	0.512903	1.087e-05	7.9e-07	0.890169	0.00019712	1.368e-05	ILMN_1221981
1344	PPIE	R1ML0 RFL+	R2ML+ RFL+	0.0908647	0.229746	0.415208	0.0998892	0.00431609	2e-08	0.640612	0.0252874	6.5e-07	ILMN_2970685	Mus musculus peptidylprolyl isomerase E (cyclophilin E) (Ppie), mRNA.
1345	ARFGAP2	R1ML0 RFL+	R2ML0 RFL+	0.0154962	0.206544	0.534509	0.873231	0.0402926	1e-08	0.975871	0.128845	2.8e-07	ILMN_2450215	Mus musculus zinc finger protein 289 (Zfp289), mRNA.
1346	ARFGAP2	R1ML0 RFL+	R2ML0 RFL+	-0.0928722	0.111175	0.511042	0.133979	0.141912	1e-08	0.676458	0.306707	3.3e-07	ILMN_2461696	Mus musculus zinc finger protein 289 (Zfp289), mRNA.
1347	ARFGAP2	R1ML0 RFL+	R2ML0 RFL+	0.0244887	0.192465	0.645119	0.803745	0.0334196	0	0.961171	0.112701	1e-08	ILMN_2853409	Mus musculus zinc finger protein 289 (Zfp289), mRNA.
1348	CDC42EP4	R1ML0 RFL+	R2ML+ RFL+	0.126053	0.196553	0.521696	0.145753	0.00211624	0	0.685095	0.0147577	5e-08	ILMN_2728431	Mus musculus CDC42 effector protein (Rho GTPase binding) 4 (Cdc42ep4), mRNA.
1349	CNOT10	R1ML0 RFL+	R2ML+ RFL+	0.0912331	0.253114	0.377289	0.0948238	0.00581701	0	0.633591	0.0315624	2e-08	ILMN_2601020	Mus musculus CCR4-NOT transcription complex, subunit 10 (Cnot10), mRNA.
1350	PHKA2	R1ML0 RFL+	R2ML+ RFL+	0.0593308	0.237474	0.344318	0.17904	0.00032386	3e-08	0.709492	0.00332887	1.05e-06	ILMN_2725083	Mus musculus phosphorylase kinase alpha 2 (Phka2), mRNA.
1351	COG1	R1ML0 RFL+	R2ML+ RFL+	-0.0119624	0.226061	0.393557	0.818091	1.383e-05	6e-08	0.963843	0.0002421	1.56e-06	ILMN_2850849	Mus musculus component of oligomeric golgi complex 1 (Cog1), mRNA.
1352	KRTCAP3	R1ML0 RFL+	R2ML+ RFL+	-0.0323609	0.177044	0.405339	0.339514	0.0026214	1e-08	0.814807	0.017237	4.9e-07	ILMN_2859518	Mus musculus keratinocyte associated protein 3 (Krtcap3), mRNA.
1353	SARS	R1ML0 RFL+	R2ML+ RFL+	-0.00865414	0.230965	0.353714	0.876533	0.00360543	0	0.976131	0.0219471	6e-08	ILMN_2871412	Mus musculus seryl-aminoacyl-tRNA synthetase (Sars), mRNA.
1354	ECD	R1ML0 RFL+	R2ML+ RFL+	0.0213233	0.331228	0.451315	0.715048	9e-08	0	0.940898	3.05e-06	0	ILMN_2611244	Mus musculus ecdysoneless homolog (Drosophila) (Ecd), mRNA.
1355	ERGIC3	R1ML0 RFL+	R2ML+ RFL+	0.195098	0.341026	0.688429	0.025829	0.00010027	0	0.462851	0.00126931	0	ILMN_2992541	Mus musculus ERGIC and golgi 3 (Ergic3), mRNA.
1356	PPP2R5D	R1ML0 RFL+	R2ML+ RFL+	0.048391	0.299439	0.497027	0.504772	0.00221924	0	0.886821	0.0153002	0	ILMN_1250063	Mus musculus protein phosphatase 2, regulatory subunit B (B56), delta isoform (Ppp2r5d), mRNA.
1357	RNF8	R1ML0 RFL+	R2ML+ RFL+	0.0556316	0.335632	0.617458	0.424296	3.3e-07	0	0.856607	9.21e-06	1e-08	ILMN_2651534	Mus musculus ring finger protein 8 (Rnf8), mRNA.
1358	TH1L	R1ML0 RFL+	R2ML+ RFL+	0.0377669	0.232553	0.589235	0.536112	0.00209367	0	0.895515	0.0146437	0	ILMN_2606873
1359	PPP2R5D	R1ML0 RFL+	R2ML+ RFL+	-0.00075188	0.237439	0.350176	0.987252	0.00197237	0	0.99795	0.0140011	2.1e-07	ILMN_2956881	Mus musculus protein phosphatase 2, regulatory subunit B (B56), delta isoform (Ppp2r5d), mRNA.
1360	MBTPS1	R1ML0 RFL+	R2ML+ RFL+	-0.0375263	0.356974	0.376682	0.53335	1.85e-06	3e-08	0.894439	4.212e-05	1.04e-06	ILMN_1245330	Mus musculus membrane-bound transcription factor peptidase, site 1 (Mbtps1), mRNA.
1361	YIPF2	R1ML0 RFL+	R2ML+ RFL+	-0.0623985	0.232482	0.446042	0.212664	0.0084222	0	0.733141	0.041216	8e-08	ILMN_2691566	Mus musculus Yip1 domain family, member 2 (Yipf2), mRNA.
1362	2810453I06RIK	R1ML0 RFL+	R2ML+ RFL+	0.019782	0.174377	0.397271	0.745316	0.00427372	0	0.94724	0.0250907	1.2e-07	ILMN_2695228
1363	ALG3	R1ML0 RFL+	R2ML0 RFL+	0.0102481	0.192605	0.439065	0.870196	0.0476002	0	0.974948	0.144567	5e-08	ILMN_1215893
1364	NOMO1	R1ML0 RFL+	R2ML+ RFL+	0.0173383	0.354553	0.735539	0.846055	0.00191575	0	0.969601	0.0137013	1e-08	ILMN_2626389	Mus musculus nodal modulator 1 (Nomo1), mRNA.
1365	CCDC124	R1ML0 RFL+	R2ML+ RFL+	-0.0264812	0.300281	0.538301	0.737034	0.00244812	0	0.945877	0.0163912	1e-08	ILMN_2944226	Mus musculus coiled-coil domain containing 124 (Ccdc124), mRNA.
1366	HRAS1	R1ML0 RFL+	R2ML+ RFL+	-0.106195	0.326114	0.654238	0.206441	0.00072993	0	0.728302	0.00641269	0	ILMN_1223624
1367	MBD3	R1ML0 RFL+	R2ML+ RFL+	0.00999248	0.330921	0.564756	0.902611	4.299e-05	0	0.982147	0.00062033	0	ILMN_2730498
1368	ALG3	R1ML0 RFL+	R2ML+ RFL+	-0.00866917	0.285807	0.422304	0.882394	0.00348886	0	0.977312	0.0214071	9e-08	ILMN_2744459
1369	AP2A2	R1ML0 RFL+	R2ML+ RFL+	0.0239398	0.234202	0.473274	0.775218	0.00233187	0	0.955345	0.0158482	0	ILMN_1237891	Mus musculus adaptor protein complex AP-2, alpha 2 subunit (Ap2a2), mRNA.
1370	BCL2L12	R1ML0 RFL+	R2ML+ RFL+	-0.051797	0.214132	0.282765	0.190435	0.00055617	7e-08	0.717546	0.0051373	1.89e-06	ILMN_2935909	Mus musculus BCL2-like 12 (proline rich) (Bcl2l12), mRNA.
1371	GEMIN7	R1ML0 RFL+	R2ML+ RFL+	-0.0176316	0.192202	0.316687	0.627092	2.06e-06	0	0.920116	4.614e-05	1e-08	ILMN_1249986	Mus musculus gem (nuclear organelle) associated protein 7 (Gemin7), mRNA.
1372	GEMIN7	R1ML0 RFL+	R2ML0 RFL+	-0.0950602	0.133868	0.375679	0.23925	0.00613308	0	0.755628	0.0327927	5e-08	ILMN_2933618	Mus musculus gem (nuclear organelle) associated protein 7 (Gemin7), mRNA.
1373	BC031181	R1ML0 RFL+	R2ML0 RFL+	-0.106361	0.167044	0.407804	0.110816	0.0270482	0	0.652853	0.0964419	1e-08	ILMN_2913206	Mus musculus cDNA sequence BC031181 (BC031181), mRNA.
1374	FTSJ1	R1ML0 RFL+	R2ML+ RFL+	0.0336541	0.236368	0.283607	0.424296	0.00480753	2e-08	0.856607	0.0274227	6.9e-07	ILMN_1249624	Mus musculus FtsJ homolog 1 (E. coli) (Ftsj1), mRNA.
1375	VPS16	R1ML0 RFL+	R2ML+ RFL+	0.035594	0.241404	0.384313	0.466953	0.00068837	0	0.87293	0.0061245	4e-08	ILMN_2491792	Mus musculus vacuolar protein sorting 16 (yeast) (Vps16), mRNA.
1376	CD151	R1ML0 RFL+	R2ML+ RFL+	0.0774812	0.398053	0.565661	0.183281	0.00024427	1e-08	0.711984	0.00263958	3.8e-07	ILMN_2836710	Mus musculus CD151 antigen (Cd151), mRNA.
1377	SEC24C	R1ML0 RFL+	R2ML+ RFL+	-0.0135113	0.228132	0.58944	0.882683	0.00225457	0	0.977312	0.0154589	0	ILMN_1216919	Mus musculus SEC24 related gene family, member C (S. cerevisiae) (Sec24c), mRNA.
1378	RAB8A	R1ML0 RFL+	R2ML+ RFL+	0.0509098	0.289553	0.523735	0.476469	0.00048702	0	0.875933	0.0046266	5e-08	ILMN_2928051	Mus musculus RAB8A, member RAS oncogene family (Rab8a), mRNA.
1379	GPR107	R1ML0 RFL+	R2ML+ RFL+	0.0271955	0.218553	0.426932	0.528617	0.00627286	0	0.892618	0.0332907	0	ILMN_1244835	Mus musculus G protein-coupled receptor 107 (Gpr107), mRNA.
1380	LOC100044829	R1ML0 RFL+	R2ML+ RFL+	-0.0447519	0.309605	0.452839	0.325044	0.00016099	0	0.807487	0.00188213	4e-08	ILMN_1215147	Mus musculus fibrillarin (Fbl), mRNA.
1381	SAR1A	R1ML0 RFL+	R2ML+ RFL+	0.0901579	0.307325	0.572324	0.200115	1.035e-05	0	0.723844	0.00018914	1.2e-07	ILMN_2790636	Mus musculus SAR1 gene homolog A (S. cerevisiae) (Sar1a), mRNA.
1382	UBA1	R1ML0 RFL+	R2ML0 RFL+	0.146293	0.316412	0.624812	0.0396707	0.0114905	0	0.519641	0.0515396	6e-08	ILMN_2430374	Mus musculus ubiquitin-activating enzyme E1, Chr X (Ube1x), mRNA.
1383	NUCB1	R1ML0 RFL+	R2ML+ RFL+	0.0123609	0.204123	0.352396	0.860474	0.00706156	1e-07	0.972654	0.0362704	2.56e-06	ILMN_2639809	Mus musculus nucleobindin 1 (Nucb1), mRNA.
1384	DGUOK	R1ML0 RFL+	R2ML+ RFL+	0.0523158	0.389482	0.406628	0.23987	6.31e-06	1e-08	0.756246	0.00012492	4.8e-07	ILMN_1252649	Mus musculus deoxyguanosine kinase (Dguok), mRNA.
1385	RBBP5	R1ML0 RFL+	R2ML+ RFL+	0.0685639	0.404921	0.320562	0.210987	2.7e-07	0	0.731976	7.79e-06	1e-08	ILMN_2790735	Mus musculus retinoblastoma binding protein 5 (Rbbp5), mRNA.
1386	9130404D08RIK	R1ML0 RFL+	R2ML+ RFL+	0.029797	0.264035	0.288176	0.510424	7.117e-05	1.34e-06	0.889407	0.00094954	2.11e-05	ILMN_2757006	Mus musculus RIKEN cDNA 9130404D08 gene (9130404D08Rik), mRNA.
1387	BCAT2	R1ML0 RFL+	R2ML0 RFL+	0.0149699	0.129184	0.488592	0.759167	0.12927	0	0.951626	0.288354	0	ILMN_2794608	Mus musculus branched chain aminotransferase 2, mitochondrial (Bcat2), mRNA.
1388	EML3	R1ML0 RFL+	R2ML+ RFL+	0.186985	0.220175	0.39611	0.00628637	0.00209618	0	0.322664	0.0146533	0	ILMN_2830983	Mus musculus echinoderm microtubule associated protein like 3 (Eml3), mRNA.
1389	ITFG3	R1ML0 RFL+	R2ML+ RFL+	0.0588271	0.301518	0.452482	0.389741	0.00478128	0	0.84192	0.0273032	0	ILMN_2748941
1390	GPAA1	R1ML0 RFL+	R2ML+ RFL+	0.0784511	0.24807	0.331854	0.179267	3.643e-05	0	0.709492	0.00054581	3e-08	ILMN_1255423	Mus musculus GPI anchor attachment protein 1 (Gpaa1), mRNA.
1391	COPS7B	R1ML0 RFL+	R2ML+ RFL+	0.0374286	0.237333	0.25886	0.397674	0.00253127	1e-07	0.845152	0.0167861	2.54e-06	ILMN_2628283
1392	PMF1	R1ML0 RFL+	R2ML+ RFL+	0.0203008	0.297825	0.358217	0.663804	0	2.02e-06	0.929681	1.2e-07	2.994e-05	ILMN_2711410	Mus musculus polyamine-modulated factor 1 (Pmf1), mRNA.
1393	CSNK1D	R1ML0 RFL+	R2ML+ RFL+	0.0517444	0.236149	0.36594	0.523057	0.00187157	1e-08	0.891933	0.0134566	2.3e-07	ILMN_3103652
1394	PIGK	R1ML0 RFL+	R2ML+ RFL+	0.0176692	0.21986	0.242741	0.810448	0.00105803	0.000129	0.962148	0.00863942	0.00094389	ILMN_3120797	Mus musculus phosphatidylinositol glycan anchor biosynthesis, class K (Pigk), transcript variant 2, mRNA.
1395	1500019G21RIK	R1ML0 RFL+	R2ML0 RFL+	-0.10882	0.127895	0.333089	0.150919	0.0348969	2.4e-07	0.688161	0.116392	5.08e-06	ILMN_2680463	Mus musculus RIKEN cDNA 1500019G21 gene (1500019G21Rik), mRNA.
1396	ZC3HC1	R1ML0 RFL+	R2ML0 RFL+	0.000526316	0.13786	0.272333	0.98742	0.0105237	1e-08	0.99795	0.0484943	4.7e-07	ILMN_2701570	Mus musculus zinc finger, C3HC type 1 (Zc3hc1), mRNA.
1397	COMMD9	R1ML0 RFL+	R2ML0 RFL+	-0.0943308	0.095693	0.279122	0.174051	0.0652022	2.57e-06	0.704791	0.180414	3.598e-05	ILMN_2620729	Mus musculus COMM domain containing 9 (Commd9), mRNA.
1398	SLC25A38	R1ML0 RFL+	R2ML0 RFL+	-0.105827	0.159649	0.400119	0.27534	0.091259	8e-08	0.778357	0.228121	2.18e-06	ILMN_1256420	Mus musculus solute carrier family 25, member 38 (Slc25a38), mRNA.
1399	ADRM1	R1ML0 RFL+	R2ML0 RFL+	-0.0138195	0.209728	0.538679	0.905165	0.0137952	0	0.982962	0.0588862	6e-08	ILMN_2601590
1400	LOH12CR1	R1ML0 RFL+	R2ML+ RFL+	-0.00627068	0.300825	0.342262	0.926608	0.00032583	3.9e-07	0.985887	0.00334684	7.62e-06	ILMN_1218940	Mus musculus loss of heterozygosity, 12, chromosomal region 1 homolog (human) (Loh12cr1), mRNA.
1401	B3GAT3	R1ML0 RFL+	R2ML+ RFL+	0.00607519	0.298123	0.338259	0.890883	4.45e-05	0	0.979401	0.00063925	1e-08	ILMN_2729706	Mus musculus beta-1,3-glucuronyltransferase 3 (glucuronosyltransferase I) (B3gat3), mRNA.
1402	PLEKHJ1	R1ML0 RFL+	R2ML+ RFL+	-0.0265865	0.187342	0.261333	0.517398	7.666e-05	4e-07	0.891227	0.00101183	7.83e-06	ILMN_2641069	Mus musculus pleckstrin homology domain containing, family J member 1 (Plekhj1), mRNA.
1403	ATPAF2	R1ML0 RFL+	R2ML+ RFL+	0.016797	0.349035	0.420598	0.850271	2e-08	0	0.970439	7.9e-07	4e-08	ILMN_2601118	Mus musculus ATP synthase mitochondrial F1 complex assembly factor 2 (Atpaf2), mRNA.
1404	NSUN5	R1ML0 RFL+	R2ML+ RFL+	0.0312481	0.167105	0.378345	0.700126	0.00598013	1e-08	0.936697	0.0321833	4.2e-07	ILMN_1219921	Mus musculus NOL1/NOP2/Sun domain family, member 5 (Nsun5), mRNA.
1405	COQ9	R1ML0 RFL+	R2ML+ RFL+	-0.00932331	0.356439	0.55256	0.941996	0.00383006	1.539e-05	0.988568	0.0230494	0.00015908	ILMN_2774456
1406	ERAL1	R1ML0 RFL+	R2ML+ RFL+	-0.00139098	0.307561	0.369923	0.985348	1.99e-05	2.7e-07	0.99738	0.00032802	5.64e-06	ILMN_2734969	Mus musculus Era (G-protein)-like 1 (E. coli) (Eral1), mRNA.
1407	TUSC2	R1ML0 RFL+	R2ML+ RFL+	-0.0216617	0.411219	0.365104	0.71821	3.54e-06	1.34e-06	0.941784	7.551e-05	2.115e-05	ILMN_2522023	Mus musculus tumor suppressor candidate 2 (Tusc2), mRNA.
1408	TM2D3	R1ML0 RFL+	R2ML0 RFL+	-0.0441203	0.201737	0.395009	0.539909	0.0111118	1.6e-07	0.89588	0.0503688	3.78e-06	ILMN_2608574	Mus musculus TM2 domain containing 3 (Tm2d3), transcript variant 1, mRNA.
1409	CCDC84	R1ML0 RFL+	R2ML0 RFL+	-0.0116617	0.215886	0.401262	0.855411	0.0170163	2e-07	0.97149	0.0687529	4.48e-06	ILMN_1213911
1410	TRAF4	R1ML0 RFL+	R2ML+ RFL+	-0.0181654	0.345763	0.484301	0.76614	0.00547227	1.8e-07	0.952989	0.0302151	4.01e-06	ILMN_2472451	Mus musculus Tnf receptor associated factor 4 (Traf4), mRNA.
1411	TRAF4	R1ML0 RFL+	R2ML+ RFL+	0.00321053	0.375711	0.493637	0.974293	0.00014369	9.6e-07	0.99495	0.00171393	1.609e-05	ILMN_2472444	Mus musculus Tnf receptor associated factor 4 (Traf4), mRNA.
1412	ICMT	R1ML0 RFL+	R2ML0 RFL+	-0.00296992	0.229982	0.512488	0.970653	0.0392754	0	0.994081	0.12649	1e-08	ILMN_2791410	Mus musculus isoprenylcysteine carboxyl methyltransferase (Icmt), mRNA.
1413	PCSK7	R1ML0 RFL+	R2ML+ RFL+	0.00992481	0.208211	0.435723	0.886486	0.00422545	0	0.97853	0.0248755	1e-08	ILMN_2694962
1414	2010003J03RIK	R1ML0 RFL+	R2ML+ RFL+	-0.0136617	0.383053	0.38203	0.830182	0.00027008	0	0.965756	0.00286428	0	ILMN_2968032	Mus musculus RIKEN cDNA 2010003J03 gene (2010003J03Rik), mRNA.
1415	PRKRIP1	R1ML0 RFL+	R2ML+ RFL+	0.0594286	0.235	0.312304	0.412637	0.0002405	0	0.850437	0.00260542	1.2e-07	ILMN_2851888	Mus musculus Prkr interacting protein 1 (IL11 inducible) (Prkrip1), mRNA.
1416	VPS33B	R1ML0 RFL+	R2ML+ RFL+	0.0433083	0.305737	0.308414	0.399613	0.00022616	1e-08	0.845982	0.00247518	2.4e-07	ILMN_2422410	Mus musculus vacuolar protein sorting 33B (yeast) (Vps33b), mRNA.
1417	BECN1	R1ML0 RFL+	R2ML+ RFL+	0.0557895	0.244789	0.385304	0.336274	0.00175194	0	0.813306	0.0127751	8e-08	ILMN_3018758	Mus musculus beclin 1 (coiled-coil, myosin-like BCL2-interacting protein) (Becn1), mRNA.
1418	POLE3	R1ML0 RFL+	R2ML+ RFL+	0.0238045	0.454447	0.524789	0.803492	5.563e-05	0	0.961171	0.00077194	1e-08	ILMN_2840296	Mus musculus polymerase (DNA directed), epsilon 3 (p17 subunit) (Pole3), mRNA.
1419	TMEM111	R1ML0 RFL+	R2ML+ RFL+	-0.0236842	0.295316	0.368196	0.77551	0.00714859	4e-08	0.95538	0.0366004	1.31e-06	ILMN_1228253	Mus musculus transmembrane protein 111 (Tmem111), mRNA.
1420	INTS3	R1ML0 RFL+	R2ML0 RFL+	-0.0672632	0.12757	0.210985	0.00699405	0.00574085	0	0.331698	0.0313078	1.6e-07	ILMN_1229435	Mus musculus integrator complex subunit 3 (Ints3), transcript variant 1, mRNA.
1421	RPS19BP1	R1ML0 RFL+	R2ML+ RFL+	-0.118947	0.178553	0.337548	0.159338	0.00682214	1.8e-07	0.696027	0.035401	4e-06	ILMN_2699989
1422	AI553587	R1ML0 RFL+	R2ML+ RFL+	0.00833835	0.222386	0.293024	0.83544	7.48e-06	1e-08	0.966211	0.00014459	2.7e-07	ILMN_2615448
1423	JTV1	R1ML0 RFL+	R2ML+ RFL+	-0.0863684	0.197132	0.337994	0.171467	0.00182962	1e-08	0.703261	0.0131919	3.7e-07	ILMN_1244330	Mus musculus JTV1 gene (Jtv1), mRNA.
1424	JTV1	R1ML0 RFL+	R2ML0 RFL+	-0.125767	0.168447	0.380229	0.048242	0.0137492	4.3e-07	0.54458	0.0587483	8.16e-06	ILMN_2943217	Mus musculus JTV1 gene (Jtv1), mRNA.
1425	TICAM1	R1ML0 RFL+	R2ML0 RFL+	0.0657669	0.112719	0.294562	0.34169	0.0545145	0	0.816052	0.1589	1e-08	ILMN_1220387
1426	WWOX	R1ML0 RFL+	R2ML0 RFL+	0.0140752	0.114123	0.214961	0.813074	0.00558302	0	0.962335	0.0306684	9e-08	ILMN_2480178	Mus musculus WW domain-containing oxidoreductase (Wwox), mRNA.
1427	BC017158	R1ML0 RFL+	R2ML+ RFL+	0.0277895	0.241456	0.266179	0.567479	0.00022959	2.945e-05	0.90243	0.00250735	0.00027274	ILMN_1249131	Mus musculus cDNA sequence BC017158 (BC017158), mRNA.
1428	NUDT13	R1ML0 RFL+	R2ML+ RFL+	-0.0108045	0.198886	0.247658	0.827036	0.00267097	1e-08	0.965344	0.0174824	4.8e-07	ILMN_1244214
1429	POFUT1	R1ML0 RFL+	R2ML+ RFL+	-0.0594586	0.209184	0.295759	0.244008	9e-08	1.4e-07	0.759851	2.86e-06	3.28e-06	ILMN_2599360
1430	5133401N09RIK	R1ML0 RFL+	R2ML+ RFL+	0.149496	0.299377	0.403229	0.113951	0.00298285	1.5e-07	0.656921	0.0189776	3.46e-06	ILMN_3122081	Mus musculus RIKEN cDNA 5133401N09 gene (5133401N09Rik), transcript variant 1, mRNA.
1431	CPN1	R1ML0 RFL+	R2ML+ RFL+	0.0853158	0.246816	0.460571	0.321721	0.00178705	1.025e-05	0.805393	0.0129686	0.00011362	ILMN_2796199	Mus musculus carboxypeptidase N, polypeptide 1 (Cpn1), mRNA.
1432	SIL1	R1ML0 RFL+	R2ML0 RFL+	0.0466842	0.207351	0.489574	0.479529	0.0310393	1e-08	0.876751	0.106933	2.3e-07	ILMN_2720930	Mus musculus endoplasmic reticulum chaperone SIL1 homolog (S. cerevisiae) (Sil1), mRNA.
1433	SYT9	R1ML0 RFL+	R2ML0 RFL+	0.036218	0.141956	0.19697	0.413099	1.55e-05	1.1e-07	0.850662	0.00026651	2.74e-06	ILMN_2668020	Mus musculus synaptotagmin IX (Syt9), mRNA.
1434	BC048355	R1ML0 RFL+	R2ML0 RFL+	-0.0013985	0.0846491	0.388214	0.97779	0.126546	1e-08	0.995889	0.284428	4.3e-07	ILMN_2676294
1435	PIGYL	R1ML0 RFL+	R2ML+ RFL+	0.0899173	0.186465	0.476298	0.366951	0.00678719	1.1e-07	0.830419	0.0352772	2.74e-06	ILMN_1255634
1436	MRPS11	R1ML0 RFL+	R2ML0 RFL+	-0.0662556	0.132316	0.36961	0.288599	0.0404766	6e-08	0.787268	0.129337	1.56e-06	ILMN_2681946	Mus musculus mitochondrial ribosomal protein S11 (Mrps11), mRNA.
1437	CGRRF1	R1ML0 RFL+	R2ML0 RFL+	-0.069609	0.0421053	0.383652	0.430836	0.564541	6e-08	0.858689	0.728185	1.76e-06	ILMN_2635850
1438	SLC6A13	R1ML0 RFL+	R2ML+ RFL+	-0.012609	0.244105	0.396429	0.853774	2.142e-05	1.28e-06	0.971072	0.00034943	2.032e-05	ILMN_1212645
1439	ZFP637	R1ML0 RFL+	R2ML+ RFL+	-0.0153158	0.219184	0.262571	0.813879	0.00425666	1.09e-06	0.962612	0.0250109	1.781e-05	ILMN_2949275	Mus musculus zinc finger protein 637 (Zfp637), mRNA.
1440	D630048P19RIK	R1ML0 RFL+	R2ML+ RFL+	-0.045797	0.245965	0.439307	0.696574	0.00212468	0	0.935482	0.0148042	2.1e-07	ILMN_2750314
1441	RBM4	R1ML0 RFL+	R2ML0 RFL+	0.00929323	0.141912	0.407893	0.923879	0.0659445	4e-08	0.985565	0.181821	1.07e-06	ILMN_2769133
1442	TAF12	R1ML0 RFL+	R2ML+ RFL+	-0.0613459	0.308702	0.376613	0.429121	0.00215482	3.8e-07	0.858063	0.0149898	7.37e-06	ILMN_2826161	Mus musculus TAF12 RNA polymerase II, TATA box binding protein (TBP)-associated factor (Taf12), mRNA.
1443	U2AF1L4	R1ML0 RFL+	R2ML0 RFL+	-0.0833383	0.167614	0.232348	0.0658853	0.0471035	1.27e-06	0.579579	0.143567	2.018e-05	ILMN_3160302
1444	2210023G05RIK	R1ML0 RFL+	R2ML+ RFL+	0.20015	0.381579	0.484911	0.00115841	0.00351741	2e-07	0.186048	0.0215156	4.35e-06	ILMN_1247906	Mus musculus RIKEN cDNA 2210023G05 gene (2210023G05Rik), mRNA.
1445	BC056474	R1ML0 RFL+	R2ML+ RFL+	0.231451	0.253737	0.371461	0.00050972	0.0030877	1.4e-07	0.148843	0.0194637	3.27e-06	ILMN_2939185	Mus musculus cDNA sequence BC056474 (BC056474), mRNA.
1446	SEPW1	R1ML0 RFL+	R2ML+ RFL+	0.139534	0.256105	0.533065	0.321987	0.00255922	5.57e-06	0.805399	0.0169234	6.849e-05	ILMN_1252204
1447	BLOC1S1	R1ML0 RFL+	R2ML+ RFL+	0.175602	0.277482	0.569336	0.0417938	0.00039945	6e-08	0.52742	0.00393822	1.75e-06	ILMN_1235757	Mus musculus biogenesis of lysosome-related organelles complex-1, subunit 1 (Bloc1s1), mRNA.
1448	PEMT	R1ML0 RFL+	R2ML+ RFL+	0.138263	0.232596	0.392786	0.0905879	0.00107288	1.451e-05	0.624587	0.00873262	0.00015144	ILMN_1218263	Mus musculus phosphatidylethanolamine N-methyltransferase (Pemt), mRNA.
1449	ANAPC13	R1ML0 RFL+	R2ML+ RFL+	0.0429699	0.290851	0.325077	0.568098	0.00035732	1.233e-05	0.90243	0.00360368	0.00013176	ILMN_2796089	Mus musculus anaphase promoting complex subunit 13 (Anapc13), mRNA.
1450	NDUFA3	R1ML0 RFL+	R2ML+ RFL+	0.212173	0.243482	0.436265	0.0444327	0.00285079	1e-07	0.534544	0.0183601	2.62e-06	ILMN_2792560	Mus musculus NADH dehydrogenase (ubiquinone) 1 alpha subcomplex, 3 (Ndufa3), mRNA.
1451	NFIC	R1ML0 RFL+	R2ML+ RFL+	0.0318195	0.205105	0.485908	0.745881	0.00286875	1e-07	0.947242	0.0184434	2.64e-06	ILMN_1218384
1452	PMM2	R1ML0 RFL+	R2ML0 RFL+	0.0173459	0.109132	0.376756	0.745451	0.0346047	1e-08	0.94724	0.115681	4.5e-07	ILMN_2858742	Mus musculus phosphomannomutase 2 (Pmm2), mRNA.
1453	0610037L13RIK	R1ML0 RFL+	R2ML0 RFL+	0.103594	0.148404	0.239363	0.0429406	0.0383165	6.503e-05	0.532088	0.12449	0.00052947	ILMN_2622630
1454	ANP32A	R1ML0 RFL+	R2ML+ RFL+	0.29897	0.455851	0.590455	0.0131797	0.0055486	4.28e-06	0.388976	0.0304989	5.521e-05	ILMN_2685507	Mus musculus acidic (leucine-rich) nuclear phosphoprotein 32 family, member A (Anp32a), mRNA.
1455	TMBIM1	R1ML0 RFL+	R2ML+ RFL+	0.173226	0.212368	0.221205	0.0312269	0.00602767	0.00272848	0.487231	0.0323638	0.0118435	ILMN_2908056	Mus musculus transmembrane BAX inhibitor motif containing 1 (Tmbim1), mRNA.
1456	1300001I01RIK	R1ML0 RFL+	R2ML0 RFL+	0.175218	0.120123	0.355295	0.106965	0.272916	0.00055858	0.648425	0.46571	0.00318198	ILMN_1217040
1457	RHBDL1	R1ML0 RFL+	R2ML0 RFL+	0.124556	0.174175	0.318176	0.0314654	0.0508823	1.04e-06	0.48787	0.151579	1.721e-05	ILMN_2710802	Mus musculus rhomboid, veinlet-like 1 (Drosophila) (Rhbdl1), mRNA.
1458	EHD3	R1ML0 RFL+	R2ML+ RFL+	0.0978947	0.398228	0.451863	0.562165	0.00432087	8.527e-05	0.901686	0.0253096	0.00066418	ILMN_1232989	Mus musculus EH-domain containing 3 (Ehd3), mRNA.
1459	NFS1	R1ML0 RFL+	R2ML0 RFL+	0.0424361	0.226412	0.329845	0.686622	0.0152481	2.36e-06	0.933207	0.0634541	3.363e-05	ILMN_2648867	Mus musculus nitrogen fixation gene 1 (S. cerevisiae) (Nfs1), mRNA.
1460	RDH7	R1ML0 RFL+	R2ML+ RFL+	0.0676391	0.212044	0.364818	0.461497	0.00428241	0.00027486	0.871386	0.0251183	0.0017618	ILMN_1226515	Mus musculus retinol dehydrogenase 7 (Rdh7), mRNA.
1461	PDDC1	R1ML0 RFL+	R2ML0 RFL+	0.0436917	0.14493	0.424798	0.542895	0.0412451	5.8e-07	0.896454	0.131011	1.059e-05	ILMN_2857326	Mus musculus Parkinson disease 7 domain containing 1 (Pddc1), mRNA.
1462	SURF1	R1ML0 RFL+	R2ML0 RFL+	0.0322481	0.139772	0.33386	0.754745	0.185839	0.00200232	0.950119	0.365061	0.00915669	ILMN_2883561	Mus musculus surfeit gene 1 (Surf1), mRNA.
1463	RDH7	R1ML0 RFL+	R2ML0 RFL+	0.053218	0.0642895	0.241583	0.361701	0.140109	0.00173243	0.826556	0.30388	0.00812526	ILMN_2871249	Mus musculus retinol dehydrogenase 7 (Rdh7), mRNA.
1464	XK	R1ML0 RFL+	R2ML0 RFL+	0.0651955	0.157719	0.151045	0.070741	0.032758	8.62e-06	0.590945	0.111112	9.881e-05	ILMN_2453051
1465	ZKSCAN1	R1ML0 RFL+	R2ML0 RFL+	0.134286	0.259	0.239024	0.0086822	0.0141048	8.006e-05	0.347518	0.0597898	0.00062916	ILMN_3154351	Mus musculus zinc finger with KRAB and SCAN domains 1 (Zkscan1), transcript variant 2, mRNA.
1466	2310047D13RIK	R1ML0 RFL0	R2ML+ RFL0	0.0899474	0.238614	0.10394	0.0264952	0.00634475	0.0118733	0.467587	0.0335613	0.0393128	ILMN_2543108
1467	2310047D13RIK	R1ML0 RFL+	R2ML+ RFL+	0.0471729	0.231316	0.1535	0.316164	0.00463512	0.00036983	0.801545	0.0267298	0.0022676	ILMN_2909105	Mus musculus RIKEN cDNA 2310047D13 gene (2310047D13Rik), mRNA.
1468	AI597479	R1ML0 RFL+	R2ML+ RFL+	0.0345564	0.373175	0.21539	0.355088	7.806e-05	7.8e-07	0.822087	0.0010281	1.354e-05	ILMN_2970241	Mus musculus expressed sequence AI597479 (AI597479), mRNA.
1469	KBTBD4	R1ML0 RFL+	R2ML+ RFL+	0.0624737	0.35164	0.224821	0.208924	2.159e-05	2.022e-05	0.730466	0.00035165	0.0001997	ILMN_2806290	Mus musculus kelch repeat and BTB (POZ) domain containing 4 (Kbtbd4), mRNA.
1470	BRWD1	R1ML0 RFL+	R2ML+ RFL+	0.0624286	0.336	0.244131	0.364926	0.00456338	1.457e-05	0.829547	0.0264349	0.00015192	ILMN_2834573	Mus musculus bromodomain and WD repeat domain containing 1 (Brwd1), mRNA.
1471	5830404H04RIK	R1ML0 RFL+	R2ML0 RFL+	0.140526	0.337193	0.285649	0.287529	0.0154392	0.00120924	0.787019	0.0639722	0.0060238	ILMN_2944272	Mus musculus RIKEN cDNA 5830404H04 gene (5830404H04Rik), mRNA.
1472	REPIN1	R1ML0 RFL+	R2ML+ RFL+	0.0970902	0.295781	0.293482	0.184727	0.0046571	8.582e-05	0.711984	0.0267965	0.00066809	ILMN_2605767
1473	REPIN1	R1ML0 RFL+	R2ML+ RFL+	0.00671429	0.237833	0.278592	0.916695	0.00811244	0.00132481	0.984425	0.0401075	0.0064845	ILMN_3131197
1474	TARSL2	R1ML0 RFL+	R2ML+ RFL+	0.0164662	0.214061	0.245646	0.724306	0.00720193	3.733e-05	0.942708	0.0368148	0.00033193	ILMN_1237234	Mus musculus threonyl-tRNA synthetase-like 2 (Tarsl2), mRNA.
1475	NEDD4	R1ML0 RFL0	R2ML+ RFL0	0.0984887	0.283798	0.14683	0.0746635	0.00042751	0.00086735	0.596259	0.00417395	0.00456916	ILMN_2594344
1476	PPFIBP2	R1ML0 RFL+	R2ML+ RFL+	0.111158	0.466658	0.29506	0.164627	4.948e-05	1.93e-06	0.699794	0.00070208	2.885e-05	ILMN_2760001	Mus musculus protein tyrosine phosphatase, receptor-type, F interacting protein, binding protein 2 (Ppfibp2), mRNA.
1477	VEGFA	R1ML0 RFL+	R2ML+ RFL+	0.0328647	0.520246	0.269491	0.552497	0.00424052	0.00029895	0.89934	0.0249413	0.00189119	ILMN_3121255	Mus musculus vascular endothelial growth factor A (Vegfa), transcript variant 1, mRNA.
1478	9030025P20RIK	R1ML0 RFL+	R2ML+ RFL+	0.0704211	0.312421	0.319354	0.212752	0.00017237	2.54e-06	0.733344	0.00198089	3.564e-05	ILMN_3138222	Mus musculus RIKEN cDNA 9030025P20 gene (9030025P20Rik), transcript variant 2, mRNA.
1479	9030025P20RIK	R1ML0 RFL+	R2ML+ RFL+	0.0484211	0.274754	0.199384	0.33363	0.00111377	0.00087075	0.811675	0.00900016	0.00458048	ILMN_2716783
1480	PHKA2	R1ML0 RFL+	R2ML0 RFL+	0.0633684	0.206368	0.272679	0.101811	0.0195788	1.174e-05	0.641653	0.0759878	0.00012679	ILMN_2756176	Mus musculus phosphorylase kinase alpha 2 (Phka2), mRNA.
1481	MRPL3	R1ML0 RFL+	R2ML+ RFL+	0.0350602	0.321465	0.225646	0.612111	5e-08	0.0001416	0.915701	1.68e-06	0.0010198	ILMN_2643264
1482	THRA	R1ML0 RFL+	R2ML+ RFL+	0.0308947	0.251395	0.201458	0.442512	0.00195546	8.329e-05	0.862986	0.0139059	0.00065112	ILMN_2725595
1483	MAK10	R1ML0 RFL+	R2ML+ RFL+	0.095406	0.336763	0.307074	0.128058	1.162e-05	1.099e-05	0.669326	0.00020805	0.00012015	ILMN_2612403	Mus musculus MAK10 homolog, amino-acid N-acetyltransferase subunit, (S. cerevisiae) (Mak10), mRNA.
1484	ZC3H14	R1ML0 RFL+	R2ML+ RFL+	0.0475714	0.354833	0.25572	0.330998	1.009e-05	2.91e-06	0.8108	0.00018545	3.978e-05	ILMN_3014257	Mus musculus zinc finger CCCH type containing 14 (Zc3h14), transcript variant 1, mRNA.
1485	TARSL2	R1ML0 RFL0	R2ML+ RFL0	-0.0505865	0.257342	0.143057	0.307046	0.00010953	0.0083849	0.79621	0.001369	0.0297647	ILMN_2749382	Mus musculus threonyl-tRNA synthetase-like 2 (Tarsl2), mRNA.
1486	MAP2K5	R1ML0 RFL+	R2ML+ RFL+	0.00638346	0.232693	0.278152	0.910518	1.467e-05	4.08e-06	0.98318	0.00025414	5.298e-05	ILMN_2639375
1487	WHDC1	R1ML0 RFL+	R2ML0 RFL+	0.0265564	0.303175	0.335592	0.760477	0.0132668	3.56e-06	0.951762	0.0572008	4.729e-05	ILMN_3160616	Mus musculus WAS protein homology region 2 domain containing 1 (Whdc1), mRNA.
1488	DEDD	R1ML0 RFL+	R2ML+ RFL+	0.00256391	0.259421	0.253113	0.964064	4.053e-05	1.15e-06	0.992961	0.0005938	1.862e-05	ILMN_2645074	Mus musculus death effector domain-containing (Dedd), mRNA.
1489	MBTPS1	R1ML0 RFL+	R2ML+ RFL+	0.0418271	0.392518	0.302726	0.451926	7.481e-05	9.2e-07	0.866782	0.0009904	1.547e-05	ILMN_2748537	Mus musculus membrane-bound transcription factor peptidase, site 1 (Mbtps1), mRNA.
1490	SNX19	R1ML0 RFL+	R2ML+ RFL+	-0.00841353	0.218825	0.237979	0.86717	0.00623775	1.05e-06	0.974746	0.0331729	1.735e-05	ILMN_2691536
1491	2510048L02RIK	R1ML0 RFL+	R2ML0 RFL+	0.0171429	0.179333	0.22894	0.707845	0.0157537	2.726e-05	0.939297	0.0650006	0.00025516	ILMN_2815374	Mus musculus RIKEN cDNA 2510048L02 gene (2510048L02Rik), mRNA.
1492	DDO	R1ML0 RFL+	R2ML+ RFL+	-0.0552556	0.288149	0.405548	0.492929	0.0103299	0.00044052	0.882315	0.0478235	0.00262341	ILMN_2808191	Mus musculus D-aspartate oxidase (Ddo), mRNA.
1493	EARS2	R1ML0 RFL+	R2ML0 RFL+	-0.0118195	0.196061	0.256482	0.826296	0.0188483	0.00031988	0.9652	0.073987	0.00200391	ILMN_2741790
1494	MRPL35	R1ML0 RFL+	R2ML+ RFL+	0.0187594	0.304974	0.298795	0.743216	0.00085505	5.311e-05	0.947194	0.00727314	0.00044501	ILMN_2753924
1495	MTERFD2	R1ML0 RFL+	R2ML+ RFL+	0.061218	0.246623	0.240304	0.375263	0.00060913	0.0029025	0.834904	0.00553098	0.0124558	ILMN_1236049	Mus musculus MTERF domain containing 2 (Mterfd2), mRNA.
1496	EG622320	R1ML0 RFL+	R2ML0 RFL+	-0.0433835	0.259974	0.326452	0.485984	0.0123402	3.55e-05	0.880655	0.0543082	0.00031873	ILMN_2871359	Mus musculus predicted gene, EG622320 (EG622320), mRNA.
1497	KBTBD4	R1ML0 RFL+	R2ML+ RFL+	-0.0112782	0.231746	0.24986	0.825836	0.00118774	2.883e-05	0.964906	0.00949048	0.00026771	ILMN_2806291	Mus musculus kelch repeat and BTB (POZ) domain containing 4 (Kbtbd4), mRNA.
1498	MRPS22	R1ML0 RFL+	R2ML+ RFL+	-0.0543985	0.297982	0.328164	0.345127	0.00053949	8.21e-06	0.817662	0.00501755	9.487e-05	ILMN_2787396	Mus musculus mitochondrial ribosomal protein S22 (Mrps22), mRNA.
1499	GPRASP1	R1ML0 RFL+	R2ML+ RFL+	0.0688647	0.326246	0.219167	0.0711342	0.00107318	0.00034878	0.591777	0.00873262	0.00215863	ILMN_1224770
1500	SAP130	R1ML0 RFL0	R2ML+ RFL0	0.125346	0.254465	0.145768	0.0151893	3e-08	0.01631	0.39474	1e-06	0.0505997	ILMN_2680937
1501	GPBP1	R1ML0 RFL+	R2ML+ RFL+	0.101421	0.352588	0.250548	0.208907	2.04e-06	2.61e-06	0.730466	4.585e-05	3.648e-05	ILMN_2856568	Mus musculus GC-rich promoter binding protein 1 (Gpbp1), mRNA.
1502	ZFP60	R1ML0 RFL+	R2ML+ RFL+	0.0521353	0.293421	0.220613	0.29069	0.00054881	0.00050503	0.787522	0.0050839	0.00293484	ILMN_3152594	Mus musculus zinc finger protein 60 (Zfp60), transcript variant 2, mRNA.
1503	SPTLC1	R1ML0 RFL+	R2ML+ RFL+	0.0337519	0.283061	0.278661	0.443311	1.3e-07	1.35e-06	0.863601	4.09e-06	2.119e-05	ILMN_2703159	Mus musculus serine palmitoyltransferase, long chain base subunit 1 (Sptlc1), mRNA.
1504	COX15	R1ML0 RFL+	R2ML+ RFL+	-0.0155263	0.231307	0.467643	0.824177	0.00029191	1e-08	0.964713	0.00305552	3e-07	ILMN_1235186
1505	RPL22	R1ML0 RFL+	R2ML+ RFL+	0.171361	0.270289	0.439321	0.0265225	0.00823279	6.2e-07	0.467587	0.0405191	1.118e-05	ILMN_2659229	Mus musculus ribosomal protein L22 (Rpl22), mRNA.
1506	WDR22	R1ML0 RFL+	R2ML+ RFL+	0.131098	0.34986	0.43222	0.225378	0.00312435	2.68e-06	0.74365	0.0196443	3.721e-05	ILMN_1246452
1507	TAZ	R1ML0 RFL+	R2ML+ RFL+	0.0226316	0.261632	0.293738	0.671901	5.7e-07	7.8e-07	0.930354	1.495e-05	1.345e-05	ILMN_2978525	Mus musculus tafazzin (Taz), mRNA.
1508	TRUB1	R1ML0 RFL+	R2ML+ RFL+	-0.0500602	0.235202	0.329018	0.56014	0.00065362	2.887e-05	0.901436	0.00587274	0.00026806	ILMN_1240735
1509	TRUB1	R1ML0 RFL+	R2ML0 RFL+	-0.0411955	0.179781	0.259432	0.606411	0.0165089	0.00055558	0.914089	0.0672419	0.0031663	ILMN_2654568
1510	THTPA	R1ML0 RFL+	R2ML+ RFL+	0.0660902	0.329447	0.352378	0.386664	1.707e-05	3.601e-05	0.839763	0.00028772	0.00032243	ILMN_2794825	Mus musculus thiamine triphosphatase (Thtpa), mRNA.
1511	A430005L14RIK	R1ML0 RFL+	R2ML0 RFL+	-0.0642331	0.110219	0.167101	0.317381	0.0479059	0.00068849	0.801899	0.145267	0.00377793	ILMN_2706421	Mus musculus RIKEN cDNA A430005L14 gene (A430005L14Rik), mRNA.
1512	NDUFA12	R1ML0 RFL+	R2ML0 RFL+	-0.156917	0.220702	0.25025	0.0446222	0.0260552	0.00058249	0.534544	0.0937732	0.00329261	ILMN_1220362	Mus musculus NADH dehydrogenase (ubiquinone) 1 alpha subcomplex, 12 (Ndufa12), mRNA.
1513	ECM1	R1ML0 RFL+	R2ML+ RFL+	-0.121188	0.17336	0.245619	0.202693	0.00751926	0.0018159	0.725024	0.0379835	0.00844123	ILMN_1229746	Mus musculus extracellular matrix protein 1 (Ecm1), mRNA.
1514	RAB43	R1ML0 RFL+	R2ML0 RFL+	-0.000669173	0.0836404	0.210479	0.993566	0.181701	0.00048091	0.999141	0.359555	0.00281372	ILMN_1229477
1515	USF2	R1ML0 RFL+	R2ML0 RFL+	0.015406	0.13593	0.324804	0.860713	0.0477146	0.00035144	0.972678	0.144761	0.00217297	ILMN_2482756	Mus musculus upstream transcription factor 2 (Usf2), mRNA.
1516	1600002K03RIK	R1ML0 RFL+	R2ML0 RFL+	-0.101241	0.101307	0.335568	0.246417	0.0835847	2.782e-05	0.761168	0.214792	0.00025986	ILMN_3004151	Mus musculus RIKEN cDNA 1600002K03 gene (1600002K03Rik), mRNA.
1517	MRPL38	R1ML0 RFL+	R2ML+ RFL+	-0.0501955	0.236281	0.226491	0.380899	6.26e-06	0.00051749	0.837651	0.00012404	0.00298962	ILMN_2664049
1518	RNASEH2C	R1ML0 RFL+	R2ML0 RFL+	-0.13618	0.173605	0.218813	0.193666	0.0611996	0.0032431	0.721043	0.172515	0.0136421	ILMN_1259794
1519	SLC25A26	R1ML0 RFL+	R2ML0 RFL+	-0.0592481	0.113395	0.154655	0.259984	0.123377	0.00395231	0.768369	0.279418	0.0160751	ILMN_1256867
1520	1700030K09RIK	R1ML0 RFL+	R2ML0 RFL+	-0.0838797	0.0442632	0.169235	0.0885462	0.225103	0.00035504	0.622503	0.411707	0.00219207	ILMN_2705655	Mus musculus RIKEN cDNA 1700030K09 gene (1700030K09Rik), mRNA.
1521	AXIN2	R1ML0 RFL+	R2ML0 RFL+	0.0455489	0.0592632	0.2955	0.314018	0.316096	6.269e-05	0.800254	0.509613	0.00051284	ILMN_2896314	Mus musculus axin2 (Axin2), mRNA.
1522	TBX3	R1ML0 RFL+	R2ML0 RFL+	0.062391	0.177272	0.294807	0.165846	0.0250028	7.42e-06	0.699794	0.0909022	8.725e-05	ILMN_3061990	Mus musculus T-box 3 (Tbx3), transcript variant 1, mRNA.
1523	1700065O13RIK	R1ML0 RFL+	R2ML+ RFL+	0.0244361	0.227912	0.284571	0.710164	0.00238121	3.32e-06	0.939807	0.0160773	4.438e-05	ILMN_2845839	Mus musculus RIKEN cDNA 1700065O13 gene (1700065O13Rik), mRNA.
1524	SLC2A9	R1ML0 RFL+	R2ML0 RFL+	0.214707	0.237421	0.248949	0.00545313	0.0471072	0.00733221	0.307301	0.143567	0.0267181	ILMN_2682223	Mus musculus solute carrier family 2 (facilitated glucose transporter), member 9 (Slc2a9), transcript variant b, mRNA.
1525	ZFP39	R1ML0 RFL+	R2ML0 RFL+	0.0538195	0.147939	0.156455	0.125671	0.0372639	0.00155404	0.66599	0.121998	0.00740516	ILMN_1241611
1526	SLC38A3	R1ML0 RFL+	R2ML0 RFL+	0.101586	0.238491	0.51928	0.24875	0.122436	0.00096271	0.762434	0.277911	0.00498964	ILMN_2750089	Mus musculus solute carrier family 38, member 3 (Slc38a3), mRNA.
1527	LHFPL2	R1ML0 RFL+	R2ML+ RFL+	0.0325789	0.277579	0.248036	0.757726	7.415e-05	0.00323366	0.951364	0.00098269	0.013611	ILMN_2721357	Mus musculus lipoma HMGIC fusion partner-like 2 (Lhfpl2), mRNA.
1528	B230317C12RIK	R1ML0 RFL+	R2ML0 RFL+	0.0615865	0.128658	0.167482	0.144783	0.0921013	8.193e-05	0.68485	0.22944	0.00064268	ILMN_2604676	Mus musculus RIKEN cDNA B230317C12 gene (B230317C12Rik), mRNA.
1529	1300018J18RIK	R1ML0 RFL+	R2ML+ RFL+	0.139105	0.325105	0.422188	0.203133	0.00341257	0.00030349	0.725024	0.0210699	0.00191567	ILMN_2687854
1530	RHOT2	R1ML0 RFL+	R2ML+ RFL+	-0.0160752	0.237544	0.404366	0.831714	0.00148592	4.41e-06	0.965861	0.0113238	5.667e-05	ILMN_2740348	Mus musculus ras homolog gene family, member T2 (Rhot2), mRNA.
1531	CHCHD5	R1ML0 RFL+	R2ML+ RFL+	0.120519	0.212281	0.27908	0.0921804	0.00974117	0.00041308	0.626901	0.0458628	0.00248358	ILMN_2801540	Mus musculus coiled-coil-helix-coiled-coil-helix domain containing 5 (Chchd5), mRNA.
1532	ANKZF1	R1ML0 RFL+	R2ML0 RFL+	0.091594	0.155404	0.28725	0.164615	0.0874223	4.1e-07	0.699794	0.221571	7.91e-06	ILMN_1259463
1533	LAS1L	R1ML0 RFL+	R2ML0 RFL+	-0.054218	0.0270439	0.278003	0.211784	0.684912	7e-07	0.732404	0.81681	1.242e-05	ILMN_1225876
1534	BC003266	R1ML0 RFL+	R2ML0 RFL+	-0.0198947	0.113772	0.306634	0.78572	0.0148458	2.2e-07	0.95682	0.0621931	4.82e-06	ILMN_1247245
1535	PUS1	R1ML0 RFL+	R2ML+ RFL+	0.0428872	0.218482	0.289045	0.403114	1.92e-06	3e-08	0.846966	4.343e-05	9.5e-07	ILMN_2705969
1536	RHOT2	R1ML0 RFL+	R2ML+ RFL+	0.120398	0.265684	0.436137	0.125592	0.0002594	0	0.665973	0.00277919	2e-08	ILMN_2839134	Mus musculus ras homolog gene family, member T2 (Rhot2), mRNA.
1537	WIPI2	R1ML0 RFL+	R2ML0 RFL+	0.0781353	0.145754	0.501836	0.511432	0.0454294	1.7e-07	0.889577	0.140177	3.84e-06	ILMN_2784957	Mus musculus WD repeat domain, phosphoinositide interacting 2 (Wipi2), mRNA.
1538	RNMTL1	R1ML0 RFL+	R2ML+ RFL+	-0.0202105	0.214456	0.455765	0.801659	0.00239369	0	0.960739	0.0161376	7e-08	ILMN_2715234	Mus musculus RNA methyltransferase like 1 (Rnmtl1), mRNA.
1539	PHKG2	R1ML0 RFL+	R2ML0 RFL+	-0.0201729	0.0820175	0.329	0.745462	0.214188	2.38e-06	0.94724	0.39906	3.386e-05	ILMN_2619922
1540	SYF2	R1ML0 RFL+	R2ML0 RFL+	-0.0826391	0.136289	0.484179	0.134174	0.0907985	9e-08	0.676458	0.227425	2.36e-06	ILMN_1216167	Mus musculus SYF2 homolog, RNA splicing factor (S. cerevisiae) (Syf2), mRNA.
1541	RBPMS	R1ML0 RFL+	R2ML0 RFL+	-0.0705113	0.192965	0.380134	0.530801	0.0682362	2.302e-05	0.893235	0.186499	0.00022241	ILMN_1223614
1542	ZFAND2B	R1ML0 RFL+	R2ML0 RFL+	-0.0419699	-0.00485088	0.392217	0.502182	0.937471	1.88e-06	0.88668	0.967439	2.811e-05	ILMN_2676634	Mus musculus zinc finger, AN1 type domain 2B (Zfand2b), mRNA.
1543	ZFAND2B	R1ML0 RFL+	R2ML0 RFL+	-0.00669173	0.118737	0.433024	0.930908	0.102144	6e-08	0.986741	0.246114	1.61e-06	ILMN_2659440	Mus musculus zinc finger, AN1 type domain 2B (Zfand2b), mRNA.
1544	ZFAND2B	R1ML0 RFL+	R2ML0 RFL+	0.00567669	0.122439	0.487054	0.948236	0.0766905	2.85e-06	0.98925	0.202395	3.915e-05	ILMN_2800675	Mus musculus zinc finger, AN1 type domain 2B (Zfand2b), mRNA.
1545	VPS11	R1ML0 RFL+	R2ML0 RFL+	0.0700977	0.0958596	0.272682	0.224734	0.0876279	7.02e-06	0.743145	0.221937	8.321e-05	ILMN_3161554	Mus musculus vacuolar protein sorting 11 (yeast) (Vps11), mRNA.
1546	MARE	R1ML0 RFL+	R2ML0 RFL+	0.0577068	0.175754	0.231199	0.292682	0.0570517	0.00011809	0.788438	0.164283	0.00087752	ILMN_2879349	Mus musculus alpha globin regulatory element containing gene (Mare), mRNA.
1547	PHF7	R1ML0 RFL+	R2ML+ RFL+	0.140737	0.312904	0.255366	0.0573748	0.00066572	1.624e-05	0.566763	0.00595853	0.00016629	ILMN_3002610	Mus musculus PHD finger protein 7 (Phf7), mRNA.
1548	BPNT1	R1ML0 RFL+	R2ML+ RFL+	-0.0300075	0.327588	0.427875	0.794566	0.00995883	4.884e-05	0.959568	0.0465973	0.00041464	ILMN_3149112
1549	MECR	R1ML0 RFL+	R2ML+ RFL+	0.0864211	0.326088	0.264818	0.225741	0.00468244	0.00012615	0.743717	0.0269002	0.00092643	ILMN_2739517	Mus musculus mitochondrial trans-2-enoyl-CoA reductase (Mecr), mRNA.
1550	D9ERTD402E	R1ML0 RFL+	R2ML0 RFL+	-0.0233233	0.209939	0.242104	0.698362	0.0422648	9.56e-06	0.936271	0.133294	0.00010739	ILMN_2881610	Mus musculus DNA segment, Chr 9, ERATO Doi 402, expressed (D9Ertd402e), mRNA.
1551	CLDN9	R1ML0 RFL+	R2ML+ RFL+	0.0644511	0.205404	0.262304	0.105404	0.00161184	2.2e-07	0.646747	0.0120161	4.76e-06	ILMN_2607331
1552	MMP1A	R1ML0 RFL+	R2ML+ RFL+	0.0966466	0.186956	0.26433	0.00214514	0.00127275	3.3e-07	0.227875	0.0100664	6.66e-06	ILMN_3156019	Mus musculus matrix metallopeptidase 1a (interstitial collagenase) (Mmp1a), mRNA.
1553	IFNA6	R1ML0 RFL+	R2ML+ RFL+	0.0892782	0.167421	0.247065	0.0541701	0.00877541	2.33e-06	0.559014	0.0424011	3.333e-05	ILMN_2845312	Mus musculus interferon alpha 6 (Ifna6), mRNA.
1554	MPST	R1ML0 RFL+	R2ML0 RFL+	0.016406	0.243263	0.295762	0.868812	0.0160538	0.00032621	0.974843	0.0659738	0.00203867	ILMN_2669690
1555	TARBP2	R1ML0 RFL+	R2ML0 RFL+	0.022015	0.113325	0.205509	0.52167	0.0497874	6.5e-07	0.891933	0.149252	1.168e-05	ILMN_2649955
1556	CHMP7	R1ML0 RFL+	R2ML+ RFL+	0.00507519	0.174789	0.209622	0.897453	0.00100076	2.02e-06	0.981408	0.00825866	2.994e-05	ILMN_2843548	Mus musculus CHMP family, member 7 (Chmp7), mRNA.
1557	UBE2G2	R1ML0 RFL+	R2ML0 RFL+	-0.0356541	0.0982982	0.217077	0.250746	0.194467	1.8e-06	0.763716	0.37528	2.706e-05	ILMN_2521109
1558	WDR59	R1ML0 RFL+	R2ML+ RFL+	-0.0516992	0.201158	0.204494	0.0514919	0.00465206	2.44e-06	0.554668	0.026789	3.459e-05	ILMN_2680852
1559	LOC100044636	R1ML0 RFL+	R2ML+ RFL+	-0.0263383	0.209447	0.208286	0.638068	5.144e-05	1.17e-06	0.923722	0.00072429	1.892e-05	ILMN_2738554	Mus musculus FtsJ homolog 1 (E. coli) (Ftsj1), mRNA.
1560	6620401K05RIK	R1ML0 RFL+	R2ML+ RFL+	0.0331955	0.199719	0.311723	0.549694	7.13e-06	7e-08	0.897828	0.00013877	1.98e-06	ILMN_1225014	Mus musculus RIKEN cDNA 6620401K05 gene (6620401K05Rik), mRNA.
1561	CCDC71	R1ML0 RFL+	R2ML+ RFL+	0.0476241	0.189053	0.226199	0.168168	0.00075276	1.1e-07	0.700884	0.00657498	2.71e-06	ILMN_2590200
1562	AU014645	R1ML0 RFL+	R2ML+ RFL+	0.0220902	0.339947	0.285426	0.670633	1.16e-06	2.7e-07	0.929977	2.791e-05	5.66e-06	ILMN_3162184	Mus musculus expressed sequence AU014645 (AU014645), mRNA. XM_899103 XM_899107 XM_907156 XM_920218 XM_920231 XM_920251 XM_920260 XM_920269 XM_920279
1563	KCTD20	R1ML0 RFL+	R2ML+ RFL+	0.0495414	0.330018	0.33256	0.253686	0.00010203	1.2e-07	0.765071	0.00128844	3.03e-06	ILMN_2740646
1564	RAB21	R1ML0 RFL+	R2ML+ RFL+	0.110278	0.341754	0.341818	0.125574	4e-08	1.1e-07	0.665973	1.55e-06	2.69e-06	ILMN_2763867
1565	SPNB2	R1ML0 RFL+	R2ML+ RFL+	0.0267068	0.495421	0.430107	0.700314	1.912e-05	6.7e-07	0.936802	0.00031693	1.199e-05	ILMN_1214394
1566	TMEM9B	R1ML0 RFL+	R2ML+ RFL+	0.00596992	0.373684	0.417366	0.898914	3.041e-05	0	0.98169	0.00046684	9e-08	ILMN_2914880	Mus musculus TMEM9 domain family, member B (Tmem9b), mRNA.
1567	NCOA6	R1ML0 RFL+	R2ML+ RFL+	0.10718	0.313728	0.305214	0.0217224	0.00014848	1e-08	0.438382	0.00176067	3.6e-07	ILMN_2749937	Mus musculus nuclear receptor coactivator 6 (Ncoa6), mRNA.
1568	NCOA6	R1ML0 RFL+	R2ML+ RFL+	0.0714361	0.342912	0.299887	0.102014	3.87e-06	0	0.641653	8.145e-05	2.1e-07	ILMN_1229545	Mus musculus nuclear receptor coactivator 6 (Ncoa6), mRNA.
1569	GCAP14	R1ML0 RFL+	R2ML+ RFL+	-0.00830827	0.344263	0.387762	0.863052	6.4e-07	1.04e-06	0.973639	1.655e-05	1.718e-05	ILMN_3130768	Mus musculus granule cell antiserum positive 14 (Gcap14), transcript variant 2, mRNA.
1570	PEF1	R1ML0 RFL+	R2ML+ RFL+	0.0719098	0.288219	0.33319	0.142485	0.00020549	2.6e-06	0.68355	0.00228988	3.632e-05	ILMN_2643723	Mus musculus penta-EF hand domain containing 1 (Pef1), mRNA.
1571	TBCD	R1ML0 RFL+	R2ML+ RFL+	0.112008	0.279579	0.26581	0.0579695	9e-08	8.37e-06	0.567645	3.09e-06	9.651e-05	ILMN_2891506	Mus musculus tubulin-specific chaperone d (Tbcd), mRNA.
1572	ALG9	R1ML0 RFL+	R2ML+ RFL+	0.139805	0.242281	0.30453	0.180879	3.328e-05	1.77e-05	0.710631	0.00050514	0.00017893	ILMN_2609495	Mus musculus asparagine-linked glycosylation 9 homolog (yeast, alpha 1,2 mannosyltransferase) (Alg9), mRNA.
1573	LGTN	R1ML0 RFL+	R2ML+ RFL+	0.0575188	0.225447	0.313923	0.437662	0.00054724	7.76e-06	0.860009	0.00507118	9.07e-05	ILMN_2814333	Mus musculus ligatin (Lgtn), mRNA.
1574	CAML	R1ML0 RFL+	R2ML0 RFL+	0.0285789	0.140579	0.295333	0.582556	0.00966057	0	0.906954	0.0456086	2.1e-07	ILMN_2728034
1575	DDO	R1ML0 RFL+	R2ML0 RFL+	-0.0289474	0.151719	0.305994	0.643657	0.0502183	2e-06	0.925182	0.150176	2.969e-05	ILMN_1238706
1576	9330134C04RIK	R1ML0 RFL+	R2ML+ RFL+	0.0206692	0.21486	0.175488	0.703125	4.128e-05	0.00025312	0.937643	0.00060244	0.00164583	ILMN_2816547	Mus musculus RIKEN cDNA 9330134C04 gene (9330134C04Rik), mRNA.
1577	BC026590	R1ML0 RFL+	R2ML+ RFL+	0.0388195	0.259439	0.283554	0.338847	0.00034931	4.4e-07	0.814333	0.00353675	8.33e-06	ILMN_3051252	Mus musculus cDNA sequence BC026590 (BC026590), mRNA.
1578	PGAM5	R1ML0 RFL+	R2ML+ RFL+	0.00966165	0.324281	0.285107	0.854489	3e-08	1.6e-06	0.971225	1.13e-06	2.463e-05	ILMN_2802714	Mus musculus phosphoglycerate mutase family member 5 (Pgam5), mRNA.
1579	ANAPC5	R1ML0 RFL+	R2ML+ RFL+	0.000503759	0.179623	0.20164	0.993505	0.00218348	3.415e-05	0.999141	0.0151319	0.00030876	ILMN_3158200
1580	ALG5	R1ML0 RFL+	R2ML+ RFL+	-0.0553233	0.152439	0.287277	0.212597	0.0002893	2.57e-06	0.733093	0.00303306	3.598e-05	ILMN_2660414	Mus musculus asparagine-linked glycosylation 5 homolog (yeast, dolichyl-phosphate beta-glucosyltransferase) (Alg5), mRNA.
1581	UXT	R1ML0 RFL+	R2ML+ RFL+	-0.0366692	0.217974	0.36211	0.329059	2.5e-06	8.58e-06	0.810024	5.528e-05	9.843e-05	ILMN_2427063	Mus musculus ubiquitously expressed transcript (Uxt), mRNA.
1582	UXT	R1ML0 RFL+	R2ML0 RFL+	-0.047015	0.139675	0.365006	0.37732	0.00371185	6.957e-05	0.835724	0.0224696	0.00056077	ILMN_1249347	Mus musculus ubiquitously expressed transcript (Uxt), mRNA.
1583	RRP15	R1ML0 RFL+	R2ML0 RFL+	-0.0749624	0.0900614	0.207652	0.254466	0.0834452	5.898e-05	0.76587	0.214601	0.00048716	ILMN_2629856
1584	APBB2	R1ML0 RFL+	R2ML0 RFL+	0.0086015	0.128316	0.247229	0.833816	0.0677868	2.79e-06	0.966211	0.185607	3.857e-05	ILMN_2850450	Mus musculus amyloid beta (A4) precursor protein-binding, family B, member 2 (Apbb2), mRNA.
1585	HFE	R1ML0 RFL+	R2ML+ RFL+	0.0649398	0.164035	0.350336	0.404774	0.00876616	9e-08	0.847579	0.0423774	2.45e-06	ILMN_2592519	Mus musculus hemochromatosis (Hfe), mRNA.
1586	GRB2	R1ML0 RFL+	R2ML0 RFL+	0.0569774	0.0974298	0.189997	0.123401	0.00171881	9.76e-06	0.664276	0.0125907	0.0001094	ILMN_2995537	Mus musculus growth factor receptor bound protein 2 (Grb2), mRNA.
1587	RAD23A	R1ML0 RFL+	R2ML+ RFL+	0.067406	0.205596	0.267899	0.327988	0.00015023	1.087e-05	0.809543	0.00177825	0.00011909	ILMN_2637052	Mus musculus RAD23a homolog (S. cerevisiae) (Rad23a), mRNA.
1588	STK25	R1ML0 RFL+	R2ML0 RFL+	0.0857068	0.206921	0.236551	0.0318659	0.0150458	1.064e-05	0.48787	0.062877	0.00011699	ILMN_1223819
1589	RELT	R1ML0 RFL+	R2ML+ RFL+	0.0811128	0.192351	0.307143	0.202512	8.71e-06	2e-08	0.725024	0.00016382	6.6e-07	ILMN_1242889	Mus musculus tumor necrosis factor receptor superfamily, member 19-like (Tnfrsf19l), mRNA.
1590	ZFP691	R1ML0 RFL+	R2ML+ RFL+	0.0731729	0.221649	0.358646	0.288178	0.00970855	3.5e-07	0.787268	0.0457643	6.95e-06	ILMN_2813594	Mus musculus zinc finger protein 691 (Zfp691), mRNA.
1591	2700078K21RIK	R1ML0 RFL+	R2ML0 RFL+	0.0888797	0.101904	0.307923	0.210468	0.192199	4.1e-07	0.731271	0.372525	7.84e-06	ILMN_2725493
1592	UBE2R2	R1ML0 RFL+	R2ML+ RFL+	0.030218	0.189623	0.229476	0.409155	0.01021	5.53e-06	0.849065	0.0474097	6.801e-05	ILMN_1231854	Mus musculus ubiquitin-conjugating enzyme E2R 2 (Ube2r2), mRNA.
1593	RXRB	R1ML0 RFL+	R2ML0 RFL+	0.0160602	0.140798	0.19528	0.814878	0.030544	2.9e-07	0.962967	0.105538	5.88e-06	ILMN_1245492
1594	TSSC4	R1ML0 RFL+	R2ML0 RFL+	0.00616541	0.11507	0.215759	0.872433	0.0797649	3.5e-07	0.975581	0.207566	6.97e-06	ILMN_2501601	Mus musculus tumor-suppressing subchromosomal transferable fragment 4 (Tssc4), transcript variant 1, mRNA.
1595	HNF1B	R1ML0 RFL+	R2ML0 RFL+	0.0646842	0.134851	0.216658	0.0666568	0.0341497	3.4e-07	0.580046	0.114442	6.89e-06	ILMN_1234902
1596	HNF1B	R1ML0 RFL+	R2ML+ RFL+	0.0456917	0.218096	0.274565	0.111844	0.00191876	1e-08	0.654084	0.0137153	3.5e-07	ILMN_1249360
1597	PRPF40B	R1ML0 RFL+	R2ML+ RFL+	0.0289023	0.227974	0.223818	0.512555	0.0028911	0.00022666	0.88995	0.018536	0.00150311	ILMN_2810331	Mus musculus PRP40 pre-mRNA processing factor 40 homolog B (yeast) (Prpf40b), mRNA.
1598	RPL21	R1ML0 RFL+	R2ML+ RFL+	0.0267218	0.273746	0.213815	0.130345	0.00969061	5e-08	0.672505	0.0457168	1.32e-06	ILMN_2688863	Mus musculus ribosomal protein L21 (Rpl21), mRNA.
1599	TCF3	R1ML0 RFL+	R2ML+ RFL+	-0.0679925	0.309079	0.311128	0.136074	0.00168926	8.63e-06	0.67878	0.0124381	9.881e-05	ILMN_3109289	Mus musculus transcription factor 3 (Tcf3), transcript variant 1, mRNA.
1600	LOC100048046	R1ML0 RFL+	R2ML0 RFL+	-0.0171654	0.171096	0.390438	0.718192	0.023536	1.35e-06	0.941784	0.0869597	2.117e-05	ILMN_2760116	Mus musculus ADP-ribosylation factor-like 6 interacting protein 4 (Arl6ip4), mRNA.
1601	LOC100048046	R1ML0 RFL+	R2ML0 RFL+	-0.0473008	0.0273421	0.327286	0.274994	0.624971	1.12e-06	0.778357	0.774231	1.821e-05	ILMN_2740176	Mus musculus ADP-ribosylation factor-like 6 interacting protein 4 (Arl6ip4), mRNA.
1602	PDXDC1	R1ML0 RFL+	R2ML+ RFL+	0.00721805	0.200123	0.272491	0.846646	0.00392883	7.34e-06	0.969603	0.0235391	8.654e-05	ILMN_3105205	Mus musculus pyridoxal-dependent decarboxylase domain containing 1 (Pdxdc1), transcript variant 3, mRNA.
1603	RHBDL7	R1ML0 RFL+	R2ML0 RFL+	-0.111602	0.0590175	0.376869	0.100743	0.257856	7.1e-07	0.641171	0.449716	1.252e-05	ILMN_2709690	Mus musculus rhomboid domain containing 2 (Rhbdd2), mRNA.
1604	TRMU	R1ML0 RFL+	R2ML0 RFL+	-0.0500301	0.123351	0.311092	0.241726	0.0124077	1e-08	0.758136	0.0544768	4.7e-07	ILMN_2451578
1605	ACOT7	R1ML0 RFL+	R2ML0 RFL+	-0.12497	0.0326491	0.16808	0.0370109	0.593239	5.252e-05	0.508415	0.750257	0.0004406	ILMN_2660182	Mus musculus acyl-CoA thioesterase 7 (Acot7), mRNA.
1606	FZD5	R1ML0 RFL+	R2ML0 RFL+	-0.145038	0.229105	0.295562	0.0842192	0.0454993	0.00120482	0.613083	0.140305	0.00600702	ILMN_3161263
1607	TBC1D10A	R1ML0 RFL+	R2ML0 RFL+	-0.159729	0.116342	0.279783	0.00282871	0.153352	2.663e-05	0.257806	0.322743	0.00025044	ILMN_2907473	Mus musculus TBC1 domain family, member 10a (Tbc1d10a), mRNA.
1608	9030221M09RIK	R1ML0 RFL+	R2ML0 RFL+	-0.00233835	0.0707807	0.152539	0.971206	0.0915084	0.00067099	0.994187	0.228522	0.00370806	ILMN_2718350
1609	SLC39A5	R1ML0 RFL+	R2ML0 RFL+	0.019	0.0685	0.15753	0.668384	0.0139831	5.99e-06	0.929977	0.0594611	7.283e-05	ILMN_3071741	Mus musculus solute carrier family 39 (metal ion transporter), member 5 (Slc39a5), mRNA.
1610	1500032D16RIK	R1ML0 RFL+	R2ML0 RFL+	0.108444	0.116825	0.344937	0.0655726	0.0225443	1.689e-05	0.578779	0.0841912	0.00017212	ILMN_3008277	Mus musculus RIKEN cDNA 1500032D16 gene (1500032D16Rik), mRNA.
1611	AP1S1	R1ML0 RFL+	R2ML0 RFL+	0.0289474	0.063114	0.259607	0.429011	0.129209	5.72e-06	0.858056	0.28827	7.003e-05	ILMN_2634108
1612	GZMD	R1ML0 RFL+	R2ML0 RFL+	0.0313383	0.010886	0.155994	0.219544	0.764342	2.154e-05	0.739038	0.868738	0.00021081	ILMN_2678281	Mus musculus granzyme D (Gzmd), mRNA.
1613	RAB24	R1ML0 RFL+	R2ML0 RFL+	-0.0105414	-0.0160175	0.264057	0.826887	0.839583	0.00021514	0.965344	0.91427	0.0014373	ILMN_2747912	Mus musculus RAB24, member RAS oncogene family (Rab24), mRNA.
1614	2210016L21RIK	R1ML0 RFL+	R2ML0 RFL+	0.0328496	0.145421	0.160887	0.273669	1.8e-07	0.00013279	0.778293	5.56e-06	0.00096712	ILMN_1251123
1615	MED9	R1ML0 RFL+	R2ML+ RFL+	-0.0352256	0.175798	0.215485	0.287306	0.00014412	7.105e-05	0.787006	0.00171691	0.00057072	ILMN_2655694
1616	4933417E01RIK	R1ML0 RFL+	R2ML0 RFL+	0.0436767	0.140272	0.219812	0.288455	0.00578375	2.1e-07	0.787268	0.0314751	4.65e-06	ILMN_1226326	Mus musculus RIKEN cDNA 4933417E01 gene (4933417E01Rik), mRNA.
1617	ASCC1	R1ML0 RFL+	R2ML0 RFL+	0.106669	0.218026	0.40961	0.11053	0.0399312	1.9e-07	0.652691	0.128024	4.18e-06	ILMN_1249719
1618	PAF1	R1ML0 RFL+	R2ML0 RFL+	0.0723534	0.177711	0.437607	0.312582	0.0335946	2e-08	0.800175	0.113083	5.8e-07	ILMN_2972372	Mus musculus Paf1, RNA polymerase II associated factor, homolog (S. cerevisiae) (Paf1), mRNA.
1619	SIN3A	R1ML0 RFL+	R2ML0 RFL+	0.0820075	0.207412	0.523381	0.277455	0.014447	0	0.780288	0.0608799	2e-08	ILMN_2612143
1620	BRF2	R1ML0 RFL+	R2ML0 RFL+	-0.00273684	0.0645965	0.337628	0.968892	0.0760476	1.27e-06	0.993639	0.201215	2.017e-05	ILMN_1258583	Mus musculus BRF2, subunit of RNA polymerase III transcription initiation factor, BRF1-like (Brf2), mRNA.
1621	GTF2F1	R1ML0 RFL+	R2ML+ RFL+	-0.00575188	0.226605	0.457827	0.90958	3.399e-05	0	0.98318	0.00051472	9e-08	ILMN_2742455
1622	PACSIN3	R1ML0 RFL+	R2ML0 RFL+	0.0183459	0.132965	0.376345	0.773312	0.00892006	0	0.95501	0.042949	1e-08	ILMN_2589015	Mus musculus protein kinase C and casein kinase substrate in neurons 3 (Pacsin3), mRNA.
1623	UPF3A	R1ML0 RFL+	R2ML0 RFL+	0.00617293	0.111149	0.322304	0.888657	0.00944368	1.6e-07	0.979093	0.0448483	3.78e-06	ILMN_2459858
1624	BAT4	R1ML0 RFL+	R2ML+ RFL+	0.0263008	0.160158	0.253226	0.475818	0.00320032	4.9e-07	0.875679	0.0200289	9.14e-06	ILMN_2996046	Mus musculus HLA-B associated transcript 4 (Bat4), mRNA.
1625	2310061F22RIK	R1ML0 RFL+	R2ML0 RFL+	0.0219549	0.100193	0.256426	0.727512	0.00127103	2.95e-06	0.942751	0.0100559	4.024e-05	ILMN_2860725	Mus musculus RIKEN cDNA 2310061F22 gene (2310061F22Rik), mRNA.
1626	ABCF1	R1ML0 RFL+	R2ML0 RFL+	-0.0396241	0.083614	0.263479	0.470653	0.0509858	9.17e-06	0.873605	0.151746	0.00010386	ILMN_2693594	Mus musculus ATP-binding cassette, sub-family F (GCN20), member 1 (Abcf1), mRNA.
1627	BC030183	R1ML0 RFL+	R2ML0 RFL+	-0.106368	0.0244649	0.283744	0.304294	0.692808	7.314e-05	0.794646	0.822124	0.00058512	ILMN_1235062	Mus musculus cDNA sequence BC030183 (BC030183), mRNA.
1628	BCL7B	R1ML0 RFL+	R2ML0 RFL+	0.0396992	0.114342	0.258128	0.297468	0.00360525	4.71e-06	0.791553	0.0219471	5.974e-05	ILMN_2685390	Mus musculus B-cell CLL/lymphoma 7B (Bcl7b), mRNA.
1629	EG545253	R1ML0 RFL+	R2ML0 RFL+	0.0375414	0.0111842	0.257914	0.350093	0.758584	1.044e-05	0.82106	0.865299	0.00011523	ILMN_3162692	Mus musculus predicted gene, EG545253 (EG545253), mRNA.
1630	KLF10	R1ML0 RFL+	R2ML0 RFL+	-0.0221654	-0.0274035	0.240414	0.683344	0.392724	0.00014434	0.932291	0.583477	0.00103491	ILMN_2648189
1631	SETD4	R1ML0 RFL+	R2ML0 RFL+	-0.019218	0.0232105	0.242801	0.673328	0.491933	1.889e-05	0.930793	0.669875	0.00018847	ILMN_2670361	Mus musculus SET domain containing 4 (Setd4), mRNA.
1632	RAB38	R1ML0 RFL+	R2ML0 RFL+	0.0792331	-0.00655263	0.210827	0.113299	0.890006	0.00040592	0.656921	0.942141	0.00244791	ILMN_2652721	Mus musculus Rab38, member of RAS oncogene family (Rab38), mRNA.
1633	TDPOZ2	R1ML0 RFL+	R2ML0 RFL+	0.0322256	-0.00496491	0.253485	0.444939	0.924099	2.262e-05	0.863827	0.960622	0.00021923	ILMN_2819311	Mus musculus TD and POZ domain containing 2 (Tdpoz2), mRNA.
1634	NR5A2	R1ML0 RFL+	R2ML0 RFL+	-0.0210977	0.029807	0.172521	0.521478	0.495171	2.892e-05	0.891933	0.672715	0.00026835	ILMN_2751680	Mus musculus nuclear receptor subfamily 5, group A, member 2 (Nr5a2), mRNA.
1635	LOC100047606	R1ML0 RFL+	R2ML0 RFL+	0.0128947	0.0732281	0.153512	0.723046	0.00565921	0.00112276	0.942708	0.0309546	0.00566051	ILMN_2675199	Mus musculus neurotrophic tyrosine kinase, receptor, type 3 (Ntrk3), transcript variant 1, mRNA.
1636	SNRP70	R1ML0 RFL+	R2ML0 RFL+	0.0666241	0.109553	0.34864	0.206343	0.138551	1.154e-05	0.728302	0.301648	0.00012498	ILMN_2670959
1637	WDR4	R1ML0 RFL+	R2ML0 RFL+	-0.0318346	0.0295702	0.23925	0.517651	0.443576	1.97e-06	0.891227	0.62946	2.924e-05	ILMN_2471045	Mus musculus WD repeat domain 4 (Wdr4), mRNA.
1638	MUS81	R1ML0 RFL+	R2ML0 RFL+	0.00284211	0.0841754	0.19456	0.939801	0.106062	7.892e-05	0.988137	0.252367	0.00062181	ILMN_2957665	Mus musculus MUS81 endonuclease homolog (yeast) (Mus81), mRNA.
1639	SF3B4	R1ML0 RFL+	R2ML0 RFL+	0.017797	0.0602018	0.167917	0.718626	0.121234	9.724e-05	0.941833	0.275963	0.00074211	ILMN_3127739	Mus musculus splicing factor 3b, subunit 4 (Sf3b4), mRNA.
1640	TSPAN17	R1ML0 RFL+	R2ML0 RFL+	-0.000781955	0.0906228	0.187363	0.98943	0.00131526	1.394e-05	0.998405	0.0103169	0.0001462	ILMN_2664884	Mus musculus tetraspanin 17 (Tspan17), mRNA.
1641	NRXN1	R1ML0 RFL+	R2ML0 RFL+	-0.0337368	0.0452632	0.170033	0.509637	0.281219	2.091e-05	0.889289	0.473836	0.00020537	ILMN_2750035
1642	ZFP335	R1ML0 RFL+	R2ML0 RFL+	0.032203	0.0497982	0.162536	0.332049	0.385112	2.571e-05	0.811289	0.575864	0.00024315	ILMN_1243052
1643	ACTR5	R1ML0 RFL+	R2ML0 RFL+	0.00839098	0.0281053	0.152988	0.863487	0.574024	2.016e-05	0.973639	0.735548	0.00019926	ILMN_1213287
1644	C330016O10RIK	R1ML0 RFL+	R2ML0 RFL+	0.0620902	0.0494474	0.241988	0.157911	0.207893	1.8e-07	0.694853	0.39231	4.11e-06	ILMN_2685222
1645	TOP1MT	R1ML0 RFL+	R2ML0 RFL+	-0.00511278	0.105316	0.2915	0.870536	0.00118331	9.5e-07	0.975148	0.0094639	1.596e-05	ILMN_3024238	Mus musculus DNA topoisomerase 1, mitochondrial (Top1mt), mRNA.
1646	LCN12	R1ML0 RFL+	R2ML+ RFL+	0.0646015	0.153482	0.224348	0.0154269	0.00762507	0.00033537	0.399219	0.0383973	0.00208519	ILMN_2660461
1647	SAC3D1	R1ML0 RFL+	R2ML0 RFL+	-0.0262481	0.133895	0.217929	0.518253	0.0483661	1.642e-05	0.891521	0.146181	0.00016785	ILMN_2691706
1648	1190005I06RIK	R1ML0 RFL+	R2ML0 RFL+	-0.0932406	0.0779737	0.401402	0.275313	0.337693	3.686e-05	0.778357	0.531168	0.0003288	ILMN_2699367	Mus musculus RIKEN cDNA 1190005I06 gene (1190005I06Rik), mRNA.
1649	CMTM8	R1ML0 RFL+	R2ML0 RFL+	-0.0428872	0.0361842	0.515476	0.633199	0.66745	3.388e-05	0.922881	0.804402	0.00030702	ILMN_1249046	Mus musculus CKLF-like MARVEL transmembrane domain containing 8 (Cmtm8), mRNA.
1650	CMTM8	R1ML0 RFL+	R2ML0 RFL+	0.0163233	0.197061	0.514869	0.835278	0.0628149	5.158e-05	0.966211	0.175451	0.00043385	ILMN_2801427	Mus musculus CKLF-like MARVEL transmembrane domain containing 8 (Cmtm8), mRNA.
1651	GM114	R1ML0 RFL+	R2ML+ RFL+	-0.033594	0.16493	0.27464	0.496713	0.00634701	0.00071161	0.884181	0.0335623	0.00387694	ILMN_2828492	Mus musculus gene model 114, (NCBI) (Gm114), mRNA. XM_925684 XM_925685
1652	TBC1D17	R1ML0 RFL+	R2ML0 RFL+	-0.0939173	-0.0467982	0.205479	0.139276	0.505188	0.00845739	0.682711	0.680639	0.0299724	ILMN_2611993
1653	AKAP1	R1ML0 RFL+	R2ML0 RFL+	-0.0165789	0.101754	0.32664	0.790054	0.285688	0.00052432	0.958411	0.4784	0.00302298	ILMN_2775655
1654	AKAP1	R1ML0 RFL+	R2ML0 RFL+	-0.0614887	0.118702	0.472735	0.477626	0.132249	8.523e-05	0.875998	0.292499	0.00066405	ILMN_1219231
1655	TEX264	R1ML0 RFL+	R2ML0 RFL+	-0.117308	0.00142982	0.376955	0.261292	0.983647	4.469e-05	0.768401	0.99113	0.00038539	ILMN_3111593
1656	ZCCHC14	R1ML0 RFL+	R2ML0 RFL+	0.019609	0.0637281	0.222744	0.589685	0.380975	0.00172186	0.908353	0.572592	0.00808603	ILMN_1235054	Mus musculus zinc finger, CCHC domain containing 14 (Zcchc14), mRNA.
1657	WIPI2	R1ML0 RFL+	R2ML0 RFL+	0.0415338	0.0974386	0.174994	0.486692	0.168667	0.00047374	0.880679	0.343576	0.00278192	ILMN_1240515
1658	LRPPRC	R1ML0 RFL+	R2ML+ RFL+	-0.0178797	0.287263	0.37569	0.81997	0.00723718	7.2e-07	0.964168	0.0369656	1.259e-05	ILMN_2845214	Mus musculus leucine-rich PPR-motif containing (Lrpprc), mRNA.
1659	NBR1	R1ML0 RFL+	R2ML0 RFL+	0.0287143	0.138	0.215021	0.638672	0.0290928	0.00051881	0.923722	0.101879	0.00299389	ILMN_2664797
1660	NBR1	R1ML0 RFL+	R2ML0 RFL+	0.0422857	0.149	0.25917	0.44291	0.065146	0.00045934	0.86341	0.180316	0.00271598	ILMN_1220889
1661	BFAR	R1ML0 RFL+	R2ML0 RFL+	-0.0181203	0.13507	0.327205	0.812197	0.00733451	8.47e-06	0.962335	0.0373336	9.742e-05	ILMN_2987995	Mus musculus bifunctional apoptosis regulator (Bfar), mRNA.
1662	CLMN	R1ML0 RFL+	R2ML0 RFL+	0.0544662	0.102561	0.306643	0.606113	0.376129	0.00162376	0.913989	0.568285	0.00768856	ILMN_1241142
1663	SPNB3	R1ML0 RFL+	R2ML0 RFL+	0.0765113	0.0773684	0.272491	0.418859	0.372272	0.00389192	0.853369	0.564635	0.0158658	ILMN_2661588
1664	CYP4F15	R1ML0 RFL+	R2ML0 RFL+	0.0515113	0.0280351	0.326542	0.639193	0.852921	0.00951094	0.923722	0.921795	0.0330051	ILMN_2906226	Mus musculus cytochrome P450, family 4, subfamily f, polypeptide 15 (Cyp4f15), mRNA.
1665	FAM169B	R1ML0 RFL+	R2ML0 RFL+	-0.121992	0.0934123	0.279274	0.178207	0.358306	0.00380834	0.709432	0.551407	0.0155957	ILMN_3014674	Mus musculus predicted gene, EG434197 (EG434197), mRNA.
1666	SLC25A42	R1ML0 RFL+	R2ML0 RFL+	0.0585038	0.0319561	0.528622	0.678342	0.790017	0.00046141	0.93224	0.885466	0.00272633	ILMN_2810937	Mus musculus solute carrier family 25, member 42 (Slc25a42), mRNA.
1667	SPHK2	R1ML0 RFL+	R2ML0 RFL+	0.0331053	-0.0383947	0.38283	0.807149	0.715954	0.00053573	0.961873	0.837357	0.00307634	ILMN_2718791	Mus musculus sphingosine kinase 2 (Sphk2), transcript variant 2, mRNA.
1668	RSAD1	R1ML0 RFL+	R2ML0 RFL+	-0.090203	0.00236842	0.314518	0.282753	0.977018	8.286e-05	0.783096	0.987856	0.00064877	ILMN_2802168	Mus musculus radical S-adenosyl methionine domain containing 1 (Rsad1), mRNA.
1669	TMEM186	R1ML0 RFL+	R2ML0 RFL+	-0.0748722	0.0655088	0.270449	0.246643	0.169364	5.41e-06	0.761224	0.344483	6.691e-05	ILMN_1244936
1670	CTSF	R1ML0 RFL+	R2ML0 RFL+	-0.0745113	0.0777982	0.211414	0.299973	0.312343	0.00146023	0.793371	0.505592	0.00704138	ILMN_2615879	Mus musculus cathepsin F (Ctsf), mRNA.
1671	EIF4B	R1ML0 RFL+	R2ML0 RFL+	-0.0443759	0.146386	0.175292	0.505629	0.182446	0.00620221	0.887147	0.360502	0.0233419	ILMN_2753323
1672	4632417N05RIK	R1ML+ RFL+	R2ML0 RFL+	0.321398	0.322851	0.299241	5.254e-05	0.0513234	0.007141	0.0428812	0.152346	0.0262034	ILMN_2886896	Mus musculus RIKEN cDNA 4632417N05 gene (4632417N05Rik), mRNA.
1673	ALDH8A1	R1ML0 RFL+	R2ML0 RFL+	0.0915865	0.194825	0.290848	0.13601	0.0670775	0.00284682	0.678651	0.184076	0.0122743	ILMN_2775723
1674	A530082C11RIK	R1ML0 RFL+	R2ML0 RFL+	0.0352932	0.123579	0.183976	0.732181	0.21604	0.0140935	0.944108	0.401259	0.0449553	ILMN_1242542	Mus musculus RIKEN cDNA A530082C11 gene (A530082C11Rik), mRNA.
1675	DLG3	R1ML0 RFL+	R2ML0 RFL+	0.0222331	0.281447	0.298842	0.752246	0.0463613	0.00045562	0.948974	0.142149	0.0026986	ILMN_2993836	Mus musculus discs, large homolog 3 (Drosophila) (Dlg3), mRNA.
1676	DUS4L	R1ML0 RFL+	R2ML+ RFL+	0.0400451	0.25614	0.166735	0.544415	0.00632976	0.00492082	0.896454	0.0335097	0.0192584	ILMN_1254444	Mus musculus dihydrouridine synthase 4-like (S. cerevisiae) (Dus4l), mRNA.
1677	SCNN1A	R1ML0 RFL+	R2ML0 RFL+	0.198564	0.369421	0.44872	0.0967557	0.0412246	0.0002625	0.635772	0.130994	0.00169824	ILMN_2729607	Mus musculus sodium channel, nonvoltage-gated, type I, alpha (Scnn1a), mRNA.
1678	DEPDC6	R1ML0 RFL+	R2ML0 RFL+	0.199256	0.266851	0.285661	0.00538775	0.0881232	0.00428526	0.305797	0.222818	0.0171953	ILMN_3163001	Mus musculus DEP domain containing 6 (Depdc6), transcript variant 1, mRNA.
1679	A530050D06RIK	R1ML0 RFL+	R2ML0 RFL+	0.319511	0.159035	0.478845	0.096087	0.282272	0.00933509	0.635068	0.474698	0.0325002	ILMN_2615380
1680	SLC27A5	R1ML0 RFL+	R2ML0 RFL+	0.0497594	0.00630702	0.300699	0.446856	0.945878	0.00096566	0.864442	0.971799	0.00499954	ILMN_2847061	Mus musculus solute carrier family 27 (fatty acid transporter), member 5 (Slc27a5), mRNA.
1681	HBS1L	R1ML0 RFL+	R2ML0 RFL+	0.0283008	0.209825	0.235036	0.74393	0.0580101	0.00776992	0.94724	0.166207	0.0280379	ILMN_3139405	Mus musculus Hbs1-like (S. cerevisiae) (Hbs1l), transcript variant 2, mRNA.
1682	HYAL1	R1ML0 RFL+	R2ML0 RFL+	0.0433459	0.134798	0.278491	0.661835	0.401687	0.013571	0.92918	0.592036	0.0435919	ILMN_2644375	Mus musculus hyaluronoglucosaminidase 1 (Hyal1), mRNA.
1683	9030607L17RIK	R1ML0 RFL+	R2ML0 RFL+	0.214729	0.0551579	0.269759	0.0455982	0.588207	0.002228	0.537526	0.746042	0.0100023	ILMN_1256705
1684	9030607L17RIK	R1ML0 RFL+	R2ML0 RFL+	0.0873083	0.0159035	0.264301	0.442753	0.905587	0.0130296	0.863234	0.951143	0.0422061	ILMN_2677144
1685	SAT2	R1ML0 RFL+	R2ML0 RFL+	0.153662	0.048614	0.354482	0.202296	0.694894	0.00016084	0.725024	0.823531	0.00113078	ILMN_2645473
1686	ACY1	R1ML0 RFL+	R2ML0 RFL+	0.0740526	0.0840526	0.29417	0.527658	0.44543	0.00293018	0.892371	0.631132	0.0125579	ILMN_2945472	Mus musculus aminoacylase 1 (Acy1), mRNA.
1687	DCXR	R1ML0 RFL+	R2ML0 RFL+	0.179692	0.140596	0.366113	0.188537	0.296242	0.00072716	0.715768	0.488844	0.00394547	ILMN_2868280	Mus musculus dicarbonyl L-xylulose reductase (Dcxr), mRNA.
1688	DCXR	R1ML0 RFL+	R2ML0 RFL+	0.144872	0.0514912	0.531571	0.353394	0.776966	0.00011078	0.821888	0.877074	0.00083067	ILMN_2759108	Mus musculus dicarbonyl L-xylulose reductase (Dcxr), mRNA.
1689	HPD	R1ML0 RFL+	R2ML0 RFL+	-0.00853383	-0.0472719	0.568232	0.963099	0.761578	0.00041255	0.992797	0.867169	0.00248099	ILMN_2731444	Mus musculus 4-hydroxyphenylpyruvic acid dioxygenase (Hpd), mRNA.
1690	GCHFR	R1ML0 RFL+	R2ML0 RFL+	0.069188	-0.0508596	0.496286	0.437819	0.678091	0.00012697	0.860009	0.812009	0.00093142	ILMN_2744603
1691	GCHFR	R1ML0 RFL+	R2ML0 RFL+	0.161346	0.0972982	0.576399	0.19854	0.566873	0.00012398	0.722884	0.72978	0.0009139	ILMN_2655126
1692	PXMP2	R1ML0 RFL+	R2ML0 RFL+	0.142451	0.0224035	0.519872	0.101575	0.862626	1.262e-05	0.641642	0.926801	0.00013469	ILMN_1219748
1693	SPRYD4	R1ML0 RFL+	R2ML0 RFL+	-0.014406	-0.0160965	0.250604	0.822942	0.837102	7.598e-05	0.964433	0.913147	0.00060394	ILMN_1240871
1694	C330001K17RIK	R1ML0 RFL+	R2ML0 RFL+	-0.0350902	0.140886	0.335667	0.656112	0.167109	7.54e-06	0.927092	0.341388	8.842e-05	ILMN_2987394	Mus musculus RIKEN cDNA C330001K17 gene (C330001K17Rik), mRNA.
1695	EEFSEC	R1ML0 RFL+	R2ML0 RFL+	0.0182481	0.144772	0.19294	0.737194	0.0262427	4.927e-05	0.945909	0.0942501	0.00041768	ILMN_2849985	Mus musculus eukaryotic elongation factor, selenocysteine-tRNA-specific (Eefsec), mRNA.
1696	GNMT	R1ML0 RFL+	R2ML0 RFL+	-0.0206767	0.0190614	0.292098	0.7946	0.889981	0.00169964	0.959568	0.942141	0.00799774	ILMN_2837816	Mus musculus glycine N-methyltransferase (Gnmt), mRNA.
1697	RWDD3	R1ML0 RFL0	R2ML+ RFL0	0.161789	0.223456	0.0896994	0.04627	0.00113601	0.256815	0.539437	0.00914637	0.401861	ILMN_2922728	Mus musculus RWD domain containing 3 (Rwdd3), mRNA.
1698	RWDD3	R1ML0 RFL+	R2ML0 RFL+	0.0357669	0.135553	0.247759	0.648258	0.0312466	9.593e-05	0.926377	0.107507	0.00073348	ILMN_1236100
1699	SOAT2	R1ML0 RFL+	R2ML0 RFL+	0.104308	0.10857	0.234196	0.0192899	0.0105617	0.0005291	0.428059	0.0485865	0.00304508	ILMN_2811886	Mus musculus sterol O-acyltransferase 2 (Soat2), mRNA.
1700	2810408M09RIK	R1ML0 RFL+	R2ML+ RFL+	0.034015	0.188158	0.191274	0.330279	0.00916536	6.7e-07	0.810155	0.0438589	1.189e-05	ILMN_2851455	Mus musculus RIKEN cDNA 2810408M09 gene (2810408M09Rik), mRNA.
1701	MGAT1	R1ML0 RFL+	R2ML+ RFL+	0.0496015	0.244316	0.189762	0.402986	0.00036264	0.00031625	0.846966	0.00364865	0.00198599	ILMN_2667234	Mus musculus mannoside acetylglucosaminyltransferase 1 (Mgat1), mRNA. XM_921556 XM_921561
1702	2810432D09RIK	R1ML0 RFL+	R2ML0 RFL+	0.0573233	0.106061	0.432262	0.543623	0.0993279	3e-08	0.896454	0.241684	9.1e-07	ILMN_2974601	Mus musculus RIKEN cDNA 2810432D09 gene (2810432D09Rik), mRNA.
1703	ZFP213	R1ML0 RFL+	R2ML0 RFL+	0.0354211	0.115588	0.335417	0.563415	0.0114798	1.8e-07	0.901686	0.051535	4.11e-06	ILMN_3160203	Mus musculus zinc finger protein 213 (Zfp213), mRNA.
1704	COMMD5	R1ML0 RFL+	R2ML0 RFL+	-0.0319248	0.0172895	0.394539	0.580582	0.761697	8.1e-07	0.906576	0.867228	1.388e-05	ILMN_1214793
1705	E430018J23RIK	R1ML0 RFL+	R2ML+ RFL+	0.128496	0.207377	0.254193	0.0459072	0.01071	3.894e-05	0.538419	0.0489862	0.00034374	ILMN_2881039	Mus musculus RIKEN cDNA E430018J23 gene (E430018J23Rik), mRNA.
1706	D11WSU47E	R1ML0 RFL+	R2ML0 RFL+	0.0526466	0.121123	0.227613	0.265775	0.00249338	3.9e-07	0.771614	0.016612	7.54e-06	ILMN_2700833	Mus musculus DNA segment, Chr 11, Wayne State University 47, expressed (D11Wsu47e), mRNA.
1707	2810441K11RIK	R1ML0 RFL+	R2ML0 RFL+	0.131782	0.159377	0.38228	0.153423	0.0408775	1e-08	0.691425	0.130245	4.6e-07	ILMN_2799217	Mus musculus RIKEN cDNA 2810441K11 gene (2810441K11Rik), mRNA.
1708	CAMK2N1	R1ML0 RFL+	R2ML0 RFL+	0.0751203	0.225763	0.415554	0.385539	0.0118509	2.158e-05	0.839159	0.0527292	0.00021109	ILMN_2810963	Mus musculus calcium/calmodulin-dependent protein kinase II inhibitor 1 (Camk2n1), mRNA.
1709	RPAIN	R1ML0 RFL+	R2ML+ RFL+	0.0781203	0.24243	0.41808	0.219069	0.00209101	7.6e-07	0.738673	0.0146291	1.315e-05	ILMN_2968807	Mus musculus RPA interacting protein (Rpain), mRNA.
1710	EIF2B5	R1ML0 RFL+	R2ML0 RFL+	0.0352556	0.144518	0.180512	0.501369	0.00806998	3.13e-05	0.88668	0.0399719	0.00028783	ILMN_2602140	Mus musculus eukaryotic translation initiation factor 2B, subunit 5 epsilon (Eif2b5), mRNA.
1711	EIF2B5	R1ML0 RFL+	R2ML0 RFL+	0.046406	0.185763	0.190952	0.450211	0.0152164	1.562e-05	0.8662	0.0633736	0.00016118	ILMN_2930067	Mus musculus eukaryotic translation initiation factor 2B, subunit 5 epsilon (Eif2b5), mRNA.
1712	MED4	R1ML0 RFL+	R2ML+ RFL+	0.0514361	0.204746	0.255946	0.281714	0.00350131	1.033e-05	0.782704	0.021466	0.0001143	ILMN_2497094
1713	PCGF1	R1ML0 RFL+	R2ML+ RFL+	-0.0201278	0.203825	0.286137	0.621125	0.00287646	3.9e-07	0.917983	0.0184791	7.61e-06	ILMN_2606130	Mus musculus polycomb group ring finger 1 (Pcgf1), mRNA.
1714	FOXJ3	R1ML0 RFL+	R2ML0 RFL+	0.022406	0.12943	0.212089	0.592686	0.0110193	3.15e-06	0.90867	0.0500287	4.251e-05	ILMN_2688740	Mus musculus forkhead box J3 (Foxj3), mRNA.
1715	ZDHHC16	R1ML0 RFL+	R2ML+ RFL+	0.112579	0.252412	0.254134	0.0682791	0.00540014	4.4e-07	0.584467	0.0299071	8.43e-06	ILMN_2964608	Mus musculus zinc finger, DHHC domain containing 16 (Zdhhc16), mRNA.
1716	1700016D06RIK	R1ML0 RFL+	R2ML0 RFL+	0.0369398	-0.00263158	0.167667	0.336433	0.905791	2.38e-05	0.813335	0.951171	0.00022852	ILMN_2939579	Mus musculus RIKEN cDNA 1700016D06 gene (1700016D06Rik), mRNA.
1717	NACC1	R1ML0 RFL+	R2ML0 RFL+	0.0410376	0.0373947	0.179336	0.379894	0.153653	5e-07	0.837162	0.323171	9.24e-06	ILMN_2594746	Mus musculus BTB (POZ) domain containing 14B (Btbd14b), mRNA.
1718	DUSP10	R1ML0 RFL0	R2ML+ RFL0	0.0721729	0.164316	0.129134	0.137592	0.00059401	0.00202737	0.680992	0.00541094	0.00924995	ILMN_2818964	Mus musculus dual specificity phosphatase 10 (Dusp10), mRNA.
1719	2010100O12RIK	R1ML0 RFL+	R2ML0 RFL+	0.139474	-0.0185263	0.293735	0.065749	0.829629	0.00082758	0.579209	0.909552	0.00438659	ILMN_2670427	Mus musculus RIKEN cDNA 2010100O12 gene (2010100O12Rik), mRNA.
1720	GM1381	R1ML0 RFL+	R2ML0 RFL+	0.126436	0.0430789	0.176935	0.102051	0.552916	0.0104449	0.641653	0.718861	0.035583	ILMN_2990669	Mus musculus gene model 1381, (NCBI) (Gm1381), mRNA.
1721	L3MBTL	R1ML0 RFL+	R2ML0 RFL+	0.072985	0.0678421	0.169702	0.0775039	0.197528	0.00022151	0.604069	0.379448	0.00147274	ILMN_3090844	Mus musculus l(3)mbt-like (Drosophila) (L3mbtl), mRNA.
1722	AARSD1	R1ML0 RFL+	R2ML0 RFL+	0.0791278	0.00500877	0.268015	0.379748	0.944467	0.0027173	0.836983	0.971407	0.011805	ILMN_2918440	Mus musculus alanyl-tRNA synthetase domain containing 1 (Aarsd1), mRNA.
1723	PSMD2	R1ML0 RFL+	R2ML0 RFL+	0.172917	0.0301316	0.200598	0.00809227	0.571886	0.00631272	0.342501	0.733794	0.0236957	ILMN_2682945	Mus musculus proteasome (prosome, macropain) 26S subunit, non-ATPase, 2 (Psmd2), mRNA.
1724	BMX	R1ML0 RFL+	R2ML0 RFL+	0.0856692	0.104693	0.229134	0.0764226	0.0602588	0.00028067	0.601295	0.170725	0.00179321	ILMN_2857993	Mus musculus BMX non-receptor tyrosine kinase (Bmx), mRNA.
1725	IAPP	R1ML0 RFL+	R2ML+ RFL+	0.192902	0.16464	0.219345	0.00540551	0.00491052	0.00097661	0.305797	0.0278433	0.00504849	ILMN_2996479	Mus musculus islet amyloid polypeptide (Iapp), mRNA.
1726	NCOA3	R1ML0 RFL+	R2ML0 RFL+	0.206722	-0.0234211	0.169342	0.00108044	0.721514	0.00810863	0.180105	0.840261	0.0289923	ILMN_1225608
1727	RSHL2A	R1ML0 RFL+	R2ML0 RFL+	0.0887068	0.189921	0.290363	0.18697	0.0111281	0.00176816	0.713593	0.0504071	0.00825516	ILMN_2670271
1728	HIVEP1	R1ML0 RFL+	R2ML0 RFL+	0.118962	0.0772719	0.166387	0.0345136	0.123578	0.0007607	0.498389	0.27964	0.00409664	ILMN_2657800
1729	SCN3B	R1ML0 RFL+	R2ML0 RFL+	0.11894	-0.0557982	0.152738	0.0184107	0.285766	0.00035984	0.420534	0.478455	0.00221479	ILMN_2451346
1730	AB182283	R1ML0 RFL+	R2ML0 RFL+	0.0517594	-0.0645263	0.188839	0.194175	0.0964626	7.751e-05	0.721488	0.237103	0.00061326	ILMN_1236960
1731	EDA2R	R1ML0 RFL+	R2ML0 RFL+	-0.0549474	0.0280526	0.157185	0.145025	0.534614	0.00021665	0.68485	0.704284	0.00144569	ILMN_2637295
1732	LUC7L	R1ML0 RFL+	R2ML0 RFL+	-0.00514286	0.0681667	0.223193	0.842571	0.334329	1.05e-06	0.968579	0.527524	1.729e-05	ILMN_3162618
1733	PNMA1	R1ML0 RFL+	R2ML0 RFL+	-0.00634586	-0.00146491	0.23092	0.842269	0.979165	1.972e-05	0.968489	0.988862	0.0001958	ILMN_2848305	Mus musculus paraneoplastic antigen MA1 (Pnma1), mRNA.
1734	TFPT	R1ML0 RFL+	R2ML0 RFL+	-0.0463985	0.0774825	0.205045	0.316299	0.0657573	0.00025437	0.80173	0.181519	0.00165234	ILMN_2877706	Mus musculus TCF3 (E2A) fusion partner (Tfpt), mRNA.
1735	REEP6	R1ML0 RFL+	R2ML0 RFL+	-0.0289173	0.0237018	0.210554	0.548367	0.712335	4.284e-05	0.897257	0.835038	0.00037208	ILMN_2634216	Mus musculus receptor accessory protein 6 (Reep6), mRNA.
1736	THOC3	R1ML0 RFL+	R2ML0 RFL+	0.0836767	0.0186053	0.254777	0.0779598	0.70739	1.75e-06	0.605785	0.832079	2.643e-05	ILMN_2757197	Mus musculus THO complex 3 (Thoc3), mRNA.
1737	AHSA1	R1ML0 RFL+	R2ML0 RFL+	-0.0385188	0.095386	0.306393	0.493383	0.196995	0.00063297	0.882315	0.378712	0.00353134	ILMN_2675072	Mus musculus AHA1, activator of heat shock protein ATPase homolog 1 (yeast) (Ahsa1), mRNA.
1738	FKBP2	R1ML0 RFL+	R2ML0 RFL+	0.134602	0.0701491	0.159289	0.0601891	0.203676	0.0119975	0.57031	0.387463	0.0396326	ILMN_2962273	Mus musculus FK506 binding protein 2 (Fkbp2), mRNA.
1739	PACSIN3	R1ML0 RFL+	R2ML0 RFL+	0.113541	0.0470175	0.262911	0.297918	0.607558	0.00129741	0.791964	0.761173	0.00637711	ILMN_2693815	Mus musculus protein kinase C and casein kinase substrate in neurons 3 (Pacsin3), mRNA.
1740	EPHB4	R1ML0 RFL+	R2ML0 RFL+	0.0366391	0.106711	0.230223	0.545736	0.0225296	2e-07	0.896454	0.0841769	4.36e-06	ILMN_2973206	Mus musculus Eph receptor B4 (Ephb4), mRNA.
1741	CLNS1A	R1ML0 RFL+	R2ML0 RFL+	0.00485714	0.0636667	0.205887	0.900469	0.439948	0.00108959	0.981719	0.626334	0.00553343	ILMN_2649083	Mus musculus chloride channel, nucleotide-sensitive, 1A (Clns1a), mRNA.
1742	D930040M24RIK	R1ML0 RFL+	R2ML0 RFL+	0.0439925	0.0457544	0.171095	0.143838	0.352269	0.00310041	0.68485	0.545678	0.0131536	ILMN_1235585
1743	RNF183	R1ML0 RFL+	R2ML0 RFL+	0.0974135	0.0356754	0.175208	0.0253429	0.452913	0.00024854	0.459589	0.637586	0.00161977	ILMN_2753931	Mus musculus ring finger protein 183 (Rnf183), mRNA.
1744	CST11	R1ML0 RFL+	R2ML0 RFL+	0.0820301	0.00364912	0.20164	0.0511141	0.881847	4.45e-06	0.552979	0.93786	5.717e-05	ILMN_2650856
1745	PPP2R2C	R1ML0 RFL+	R2ML0 RFL+	0.0120301	0.0126491	0.220542	0.83455	0.755392	1.531e-05	0.966211	0.862993	0.00015838	ILMN_2760691	Mus musculus protein phosphatase 2 (formerly 2A), regulatory subunit B (PR 52), gamma isoform (Ppp2r2c), mRNA.
1746	TMEM8	R1ML0 RFL+	R2ML0 RFL+	0.00481955	-0.0887281	0.369187	0.935092	0.01542	0	0.987054	0.0639398	1.4e-07	ILMN_1219908	Mus musculus transmembrane protein 8 (five membrane-spanning domains) (Tmem8), mRNA.
1747	SENP5	R1ML0 RFL+	R2ML0 RFL+	0.0196917	0.0935965	0.174417	0.537372	0.135099	9.44e-06	0.895515	0.29681	0.00010633	ILMN_2978857	Mus musculus SUMO/sentrin specific peptidase 5 (Senp5), mRNA.
1748	9430057O19RIK	R1ML0 RFL+	R2ML0 RFL+	0.0994812	0.0880526	0.201164	0.00448491	0.145945	5.067e-05	0.290299	0.312424	0.00042751	ILMN_2752600
1749	TAAR3	R1ML0 RFL+	R2ML0 RFL+	0.069985	0.0721754	0.177768	0.112004	0.0511209	6.878e-05	0.654425	0.151948	0.00055493	ILMN_2846059	Mus musculus trace amine-associated receptor 3 (Taar3), mRNA.
1750	ATP5G2	R1ML0 RFL+	R2ML+ RFL+	0.101391	0.245105	0.31886	0.0493912	0.00450977	1.7e-07	0.546283	0.0261774	3.85e-06	ILMN_2691528	Mus musculus ATP synthase, H+ transporting, mitochondrial F0 complex, subunit c (subunit 9), isoform 2 (Atp5g2), mRNA.
1751	S100A16	R1ML0 RFL+	R2ML0 RFL+	0.0321729	0.157149	0.23383	0.330791	0.0121029	3.69e-06	0.810713	0.0535377	4.876e-05	ILMN_1220521	Mus musculus S100 calcium binding protein A16 (S100a16), mRNA.
1752	SMAD3	R1ML0 RFL+	R2ML+ RFL+	0.12988	0.238404	0.285437	0.00065093	0.00095278	1.496e-05	0.149347	0.00793892	0.00015554	ILMN_2938893	Mus musculus MAD homolog 3 (Drosophila) (Smad3), mRNA.
1753	RAB13	R1ML0 RFL+	R2ML0 RFL+	0.0521429	0.120667	0.181586	0.1014	0.0791504	9.19e-06	0.641462	0.206574	0.00010396	ILMN_2647793	Mus musculus RAB13, member RAS oncogene family (Rab13), mRNA.
1754	DEFB25	R1ML0 RFL+	R2ML0 RFL+	0.0731353	0.0872544	0.155446	0.0636374	0.0120702	0.00013847	0.577082	0.0534497	0.00100093	ILMN_3160561	Mus musculus predicted gene, OTTMUSG00000015862 (OTTMUSG00000015862), mRNA.
1755	KLHDC8B	R1ML0 RFL+	R2ML0 RFL+	-0.0204812	0.00911404	0.173851	0.729302	0.877842	6.242e-05	0.943506	0.935857	0.00051135	ILMN_2959360	Mus musculus kelch domain containing 8B (Klhdc8b), mRNA.
1756	EG434171	R1ML0 RFL+	R2ML0 RFL+	0.0294361	0.0170789	0.185893	0.539149	0.715829	3.868e-05	0.895515	0.837357	0.00034201	ILMN_2879144	Mus musculus predicted gene, EG434171 (EG434171), mRNA.
1757	AFG3L1	R1ML0 RFL+	R2ML0 RFL+	0.0407594	0.089307	0.174158	0.507407	0.249674	0.00129842	0.888345	0.440159	0.00637963	ILMN_2707782
1758	FOXK1	R1ML0 RFL+	R2ML0 RFL+	0.0320376	0.0773947	0.162315	0.444515	0.203151	0.00172446	0.863792	0.386867	0.0080966	ILMN_3059798	Mus musculus forkhead box K1 (Foxk1), mRNA.
1759	SEMA5B	R1ML0 RFL+	R2ML0 RFL+	0.00980451	0.0979474	0.171241	0.819709	0.056549	0.00226126	0.964075	0.163164	0.0101198	ILMN_2606570
1760	BLMH	R1ML0 RFL+	R2ML+ RFL+	0.0936992	0.174509	0.236158	0.0593275	0.00773662	0.00011607	0.569563	0.0387691	0.00086606	ILMN_2646878	Mus musculus bleomycin hydrolase (Blmh), mRNA.
1761	RNF25	R1ML0 RFL+	R2ML0 RFL+	0.101248	0.183605	0.288327	0.107745	0.0226212	4.86e-06	0.6492	0.0843515	6.133e-05	ILMN_2863903	Mus musculus ring finger protein 25 (Rnf25), mRNA.
1762	HGS	R1ML0 RFL+	R2ML0 RFL+	-0.0180602	0.106368	0.175869	0.630115	0.0273732	0.00056034	0.921217	0.0973172	0.00319131	ILMN_2641438	Mus musculus HGF-regulated tyrosine kinase substrate (Hgs), mRNA.
1763	FAM171A2	R1ML0 RFL+	R2ML0 RFL+	-0.0332406	0.088307	0.150604	0.297043	0.0418712	0.00011632	0.791496	0.132475	0.00086719	ILMN_2704134
1764	SCD2	R1ML0 RFL+	R2ML0 RFL+	0.0100226	0.156737	0.196893	0.782293	0.0180822	0.00101875	0.955855	0.0718619	0.0052316	ILMN_2919259	Mus musculus stearoyl-Coenzyme A desaturase 2 (Scd2), mRNA.
1765	ASB12	R1ML0 RFL+	R2ML0 RFL+	0.0806391	0.0433772	0.15106	0.0223667	0.347088	1.064e-05	0.440427	0.540716	0.00011699	ILMN_2965123	Mus musculus ankyrin repeat and SOCS box-containing protein 12 (Asb12), mRNA.
1766	NUCB1	R1ML0 RFL+	R2ML0 RFL+	0.171955	0.083193	0.165357	0.0155394	0.124242	0.00591294	0.400206	0.280697	0.0224405	ILMN_2908735	Mus musculus nucleobindin 1 (Nucb1), mRNA.
1767	ACBD4	R1ML0 RFL+	R2ML0 RFL+	-0.00482707	0.104649	0.176479	0.937577	0.388567	0.00597856	0.987467	0.579278	0.0226561	ILMN_3071515
1768	RAP2A	R1ML0 RFL+	R2ML0 RFL+	-0.0239549	0.332307	0.291818	0.804057	0.0269539	1.36e-06	0.961171	0.0961723	2.128e-05	ILMN_2624862
1769	HNRNPH1	R1ML0 RFL+	R2ML+ RFL+	0.00517293	0.234149	0.233908	0.927801	0.00635232	0.00060799	0.986154	0.0335807	0.00341426	ILMN_2684987
1770	HNRPH1	R1ML0 RFL+	R2ML0 RFL+	-0.112226	0.163798	0.227842	0.0358997	0.0530067	0.00050595	0.503584	0.155617	0.00293752	ILMN_2684986
1771	MLF2	R1ML0 RFL+	R2ML+ RFL+	-0.0369398	0.270465	0.239542	0.726871	0.00159588	0.00014031	0.942708	0.0119248	0.00101221	ILMN_3075003	Mus musculus myeloid leukemia factor 2 (Mlf2), mRNA.
1772	SNRPA	R1ML0 RFL+	R2ML0 RFL+	-0.0231504	0.0542544	0.269759	0.769547	0.296139	0.00017564	0.953474	0.488816	0.00121494	ILMN_1247582
1773	DNASE1L3	R1ML0 RFL+	R2ML0 RFL+	-0.087812	0.18664	0.386033	0.65909	0.0739281	0.00011121	0.928381	0.197088	0.00083343	ILMN_2667994
1774	GPR182	R1ML0 RFL+	R2ML+ RFL+	-0.0701278	0.252325	0.296601	0.630531	0.00321379	0.00023985	0.921448	0.0200677	0.00157472	ILMN_2765378
1775	4833439L19RIK	R1ML0 RFL+	R2ML+ RFL+	0.102586	0.453825	0.320351	0.18131	1.619e-05	3.13e-06	0.711141	0.00027547	4.23e-05	ILMN_2664670
1776	DHX29	R1ML0 RFL+	R2ML+ RFL+	0.0268571	0.429	0.301637	0.580601	0	2.3e-07	0.906576	1e-08	5e-06	ILMN_2892376	Mus musculus DEAH (Asp-Glu-Ala-His) box polypeptide 29 (Dhx29), mRNA.
1777	NUBP2	R1ML0 RFL+	R2ML+ RFL+	0.0834211	0.414421	0.351188	0.187336	0	0	0.714271	2e-08	0	ILMN_2925567	Mus musculus nucleotide binding protein 2 (Nubp2), mRNA.
1778	RNF121	R1ML0 RFL+	R2ML+ RFL+	0.0906917	0.27943	0.379586	0.248825	0.0018063	0	0.762468	0.0130824	3e-08	ILMN_2903529	Mus musculus ring finger protein 121 (Rnf121), mRNA.
1779	NR2C2AP	R1ML0 RFL+	R2ML+ RFL+	0.0692331	0.231281	0.251571	0.3618	8.727e-05	4.7e-07	0.826592	0.00112697	8.94e-06	ILMN_3084818	Mus musculus RIKEN cDNA 2310073E15 gene (2310073E15Rik), transcript variant 2, mRNA.
1780	PDZD11	R1ML0 RFL+	R2ML+ RFL+	0.0733008	0.512158	0.191333	0.17498	5.6e-07	8.586e-05	0.705701	1.477e-05	0.00066818	ILMN_2972645	Mus musculus PDZ domain containing 11 (Pdzd11), mRNA.
1781	PDZD11	R1ML0 RFL+	R2ML+ RFL+	0.0153835	0.295526	0.203521	0.745623	0.00042047	6.215e-05	0.94724	0.00411298	0.00050944	ILMN_2972646	Mus musculus PDZ domain containing 11 (Pdzd11), mRNA.
1782	TRAPPC1	R1ML0 RFL+	R2ML+ RFL+	0.125376	0.606781	0.242524	0.0807004	0.0003843	0.00017172	0.609014	0.00381348	0.00119489	ILMN_1213711
1783	ABHD5	R1ML0 RFL+	R2ML+ RFL+	0.154353	0.494377	0.207824	0.0603076	0.00664222	0.00911281	0.570836	0.0346709	0.0318818	ILMN_2739295
1784	NIF3L1	R1ML0 RFL+	R2ML+ RFL+	0.110579	0.383079	0.303497	0.0675042	1.09e-06	3.69e-06	0.581572	2.644e-05	4.879e-05	ILMN_2738837	Mus musculus Ngg1 interacting factor 3-like 1 (S. pombe) (Nif3l1), mRNA.
1785	SLC25A44	R1ML0 RFL+	R2ML+ RFL+	0.181932	0.532956	0.483318	0.270426	3.191e-05	0.00034519	0.775872	0.00048697	0.00214107	ILMN_2734283	Mus musculus solute carrier family 25, member 44 (Slc25a44), mRNA.
1786	SLC30A10	R1ML0 RFL+	R2ML+ RFL+	0.505842	0.702509	0.561128	0.0186654	0.00018482	9.94e-06	0.424089	0.00209869	0.00011104	ILMN_2812926	Mus musculus solute carrier family 30, member 10 (Slc30a10), mRNA.
1787	GPR89	R1ML0 RFL+	R2ML+ RFL+	0.122744	0.232149	0.220592	0.143526	0.00499761	0.00149261	0.68485	0.028225	0.00716256	ILMN_2672544	Mus musculus G protein-coupled receptor 89 (Gpr89), mRNA.
1788	ABCA2	R1ML0 RFL+	R2ML+ RFL+	0.168729	0.322991	0.182286	0.0352465	0.00013866	0.00317988	0.502277	0.0016659	0.0134264	ILMN_1216987
1789	SLC25A23	R1ML0 RFL+	R2ML+ RFL+	0.239105	0.367439	0.244601	0.033645	0.00270524	0.0100069	0.494044	0.0176482	0.0343368	ILMN_2675672
1790	SLC31A1	R1ML0 RFL+	R2ML+ RFL+	0.194083	0.351702	0.213196	0.0347936	0.0057202	0.0132929	0.499727	0.0312085	0.0429658	ILMN_1254437	Mus musculus solute carrier family 31, member 1 (Slc31a1), mRNA.
1791	CASP7	R1ML0 RFL+	R2ML+ RFL+	0.138602	0.471316	0.359298	0.00718664	4.034e-05	2.032e-05	0.334556	0.00059197	0.00020052	ILMN_2648548	Mus musculus caspase 7 (Casp7), mRNA.
1792	MTAP	R1ML0 RFL+	R2ML+ RFL+	0.104729	0.394825	0.262455	0.177932	1.369e-05	0.00093149	0.70934	0.00023994	0.00485231	ILMN_2879486	Mus musculus methylthioadenosine phosphorylase (Mtap), mRNA.
1793	LASS2	R1ML0 RFL+	R2ML+ RFL+	0.155767	0.381886	0.224949	0.0628342	3.2e-07	0.00804951	0.577082	9.01e-06	0.0288371	ILMN_2893992	Mus musculus longevity assurance homolog 2 (S. cerevisiae) (Lass2), mRNA.
1794	D730039F16RIK	R1ML0 RFL0	R2ML+ RFL0	0.212857	0.444333	0.302146	0.0833224	0.00032587	0.024855	0.611997	0.00334684	0.0705277	ILMN_2912410	Mus musculus RIKEN cDNA D730039F16 gene (D730039F16Rik), mRNA.
1795	QDPR	R1ML0 RFL+	R2ML+ RFL+	0.360489	0.468965	0.309827	0.00178903	0.00547443	0.0152185	0.221023	0.0302205	0.0478667	ILMN_2699933	Mus musculus quinoid dihydropteridine reductase (Qdpr), mRNA.
1796	GPSN2	R1ML0 RFL+	R2ML+ RFL+	0.216278	0.451921	0.263423	0.0359801	0.00010117	0.00524535	0.503584	0.00127942	0.0202691	ILMN_2710784	Mus musculus glycoprotein, synaptic 2 (Gpsn2), mRNA.
1797	GPSN2	R1ML0 RFL+	R2ML+ RFL+	0.124925	0.277211	0.350714	0.126931	0.0008063	0.00018437	0.668009	0.00694818	0.00126543	ILMN_2994779	Mus musculus glycoprotein, synaptic 2 (Gpsn2), mRNA.
1798	HDHD3	R1ML0 RFL+	R2ML+ RFL+	0.115662	0.423781	0.455994	0.315907	0.0051352	0.00656814	0.801324	0.0287806	0.0244434	ILMN_2608145	Mus musculus haloacid dehalogenase-like hydrolase domain containing 3 (Hdhd3), mRNA.
1799	SLC25A1	R1ML0 RFL+	R2ML+ RFL+	0.0597744	0.572632	0.42056	0.55058	0	0.00019151	0.898368	2e-08	0.00130607	ILMN_2619846	Mus musculus solute carrier family 25 (mitochondrial carrier, citrate transporter), member 1 (Slc25a1), mRNA.
1800	SLC25A1	R1ML0 RFL+	R2ML+ RFL+	0.130541	0.461518	0.27947	0.21048	4.945e-05	0.00697907	0.731271	0.00070203	0.0256973	ILMN_2919263	Mus musculus solute carrier family 25 (mitochondrial carrier, citrate transporter), member 1 (Slc25a1), mRNA.
1801	MMAB	R1ML0 RFL0	R2ML+ RFL0	0.162466	0.420728	0.199899	0.186604	0.00104901	0.0249812	0.712869	0.00859303	0.0708544	ILMN_2959956	Mus musculus methylmalonic aciduria (cobalamin deficiency) type B homolog (human) (Mmab), mRNA.
1802	MMAB	R1ML0 RFL+	R2ML+ RFL+	0.215699	0.451009	0.386381	0.165127	0.00337745	0.0024569	0.699794	0.0209033	0.010833	ILMN_2764301	Mus musculus methylmalonic aciduria (cobalamin deficiency) type B homolog (human) (Mmab), mRNA.
1803	BC029214	R1ML0 RFL+	R2ML+ RFL+	0.291436	0.523246	0.366101	0.0695073	0.00171647	0.00288439	0.587987	0.0125843	0.0123988	ILMN_2768209
1804	FN3K	R1ML0 RFL+	R2ML0 RFL+	0.121895	0.151895	0.409396	0.360305	0.29628	0.00130748	0.825348	0.488844	0.00641559	ILMN_1223313
1805	TBRG1	R1ML0 RFL+	R2ML0 RFL+	0.125316	0.214816	0.244812	0.15999	0.0163739	0.00180175	0.696027	0.0668617	0.00838607	ILMN_2434144
1806	LMF1	R1ML0 RFL+	R2ML0 RFL+	0.120805	0.207114	0.222726	0.0634915	0.0217986	0.00068155	0.577082	0.0822313	0.00375053	ILMN_2655144	Mus musculus transmembrane protein 112 (Tmem112), mRNA.
1807	INDOL1	R1ML0 RFL+	R2ML0 RFL+	0.106865	0.215579	0.28247	0.0990339	0.0375736	0.00017674	0.639577	0.122744	0.0012213	ILMN_2748392	Mus musculus indoleamine-pyrrole 2,3 dioxygenase-like 1 (Indol1), mRNA.
1808	GGCX	R1ML0 RFL+	R2ML+ RFL+	0.202857	0.419	0.537955	0.152945	0.0001214	2.923e-05	0.691025	0.00149624	0.00027083	ILMN_2933647	Mus musculus gamma-glutamyl carboxylase (Ggcx), mRNA.
1809	TMEM86B	R1ML0 RFL+	R2ML0 RFL+	0.195338	0.301719	0.807723	0.160387	0.0425725	2.93e-06	0.696607	0.133851	4.004e-05	ILMN_3162202	Mus musculus transmembrane protein 86B (Tmem86b), mRNA.
1810	PNKP	R1ML0 RFL+	R2ML+ RFL+	0.115045	0.31564	0.360363	0.0980917	0.0023412	5.1e-07	0.637278	0.015899	9.42e-06	ILMN_2696270
1811	LOC100047937	R1ML0 RFL+	R2ML0 RFL+	0.375586	0.431325	0.49289	0.00590794	0.0261342	0.00023368	0.317004	0.0939524	0.00154011	ILMN_2703392	Mus musculus aldehyde dehydrogenase 1 family, member L1 (Aldh1l1), mRNA.
1812	HAAO	R1ML0 RFL+	R2ML+ RFL+	0.293316	0.390149	0.471577	0.00948958	0.00011992	0.00016776	0.358229	0.00148082	0.00116987	ILMN_2607951
1813	PSEN2	R1ML0 RFL+	R2ML+ RFL+	0.420414	0.528009	0.594449	0.0265359	0.00040093	0.00014131	0.467587	0.00394791	0.00101855	ILMN_2941992	Mus musculus presenilin 2 (Psen2), mRNA.
1814	TLCD2	R1ML0 RFL+	R2ML+ RFL+	0.334571	0.544167	0.862408	0.0372141	0.00097194	9.557e-05	0.508936	0.00807757	0.00073093	ILMN_1249828
1815	PAOX	R1ML0 RFL+	R2ML+ RFL+	0.115173	0.500982	0.553753	0.387443	0.00394021	0.00055499	0.84025	0.0235853	0.00316361	ILMN_2633942	Mus musculus polyamine oxidase (exo-N4-amino) (Paox), mRNA.
1816	PAOX	R1ML0 RFL+	R2ML+ RFL+	0.214639	0.485377	0.554054	0.0840224	0.00149196	0.00010444	0.611997	0.0113563	0.00078982	ILMN_1236459	Mus musculus polyamine oxidase (exo-N4-amino) (Paox), mRNA.
1817	BC021614	R1ML0 RFL+	R2ML0 RFL+	0.167932	0.365623	0.650568	0.185323	0.0383293	3.446e-05	0.711984	0.12449	0.00031107	ILMN_2591342
1818	IL11RA1	R1ML0 RFL+	R2ML+ RFL+	0.110045	0.416807	0.258482	0.248974	0.00072792	0.00013316	0.762834	0.00639936	0.00096933	ILMN_1229957	Mus musculus interleukin 11 receptor, alpha chain 1 (Il11ra1), mRNA.
1819	H2-K1	R1ML0 RFL+	R2ML0 RFL+	0.105135	0.250588	0.175381	0.120592	0.0823221	0.00055035	0.661127	0.212585	0.00314202	ILMN_2795520	Mus musculus histocompatibility 2, K1, K region (H2-K1), mRNA.
1820	ITPK1	R1ML0 RFL+	R2ML+ RFL+	0.0258271	0.302184	0.269696	0.815928	0.00969911	0.00369048	0.962967	0.0457362	0.0151978	ILMN_2723920	Mus musculus inositol 1,3,4-triphosphate 5/6 kinase (Itpk1), mRNA.
1821	EG624219	R1ML0 RFL+	R2ML0 RFL+	0.128917	1.1488	0.823536	0.662921	0.0125857	0.00174589	0.929355	0.0550626	0.00816899	ILMN_2996704	Mus musculus predicted gene, EG624219 (EG624219), mRNA.
1822	MID1IP1	R1ML0 RFL0	R2ML+ RFL0	0.189549	0.73643	0.300098	0.312141	4.29e-05	0.0834477	0.800103	0.00061935	0.176829	ILMN_2847332	Mus musculus Mid1 interacting protein 1 (gastrulation specific G12-like (zebrafish)) (Mid1ip1), mRNA.
1823	HES6	R1ML0 RFL0	R2ML+ RFL0	0.117068	0.775711	0.370646	0.532963	0.00468083	0.0197045	0.89414	0.026897	0.0587136	ILMN_2791952	Mus musculus hairy and enhancer of split 6 (Drosophila) (Hes6), mRNA.
1824	PAOX	R1ML0 RFL0	R2ML+ RFL0	0.0942331	0.400447	0.0148929	0.480866	0.00128091	0.880108	0.877304	0.0101075	0.924142	ILMN_2795698	Mus musculus polyamine oxidase (exo-N4-amino) (Paox), mRNA.
1825	PARP3	R1ML0 RFL+	R2ML+ RFL+	-0.086609	0.333939	0.221295	0.368372	0.00012387	0.00813081	0.830482	0.00152306	0.0290554	ILMN_2870302	Mus musculus poly (ADP-ribose) polymerase family, member 3 (Parp3), mRNA.
1826	SREBF1	R1ML0 RFL0	R2ML+ RFL0	0.123451	0.716737	0.367932	0.577597	0.00131237	0.0396097	0.905252	0.0103036	0.100668	ILMN_2792089	Mus musculus sterol regulatory element binding factor 1 (Srebf1), mRNA.
1827	AKAP2	R1ML0 RFL+	R2ML+ RFL+	0.112173	0.161816	0.207545	0.0196869	0.00754216	2.4e-07	0.432586	0.0380619	5.12e-06	ILMN_3116504	Mus musculus A kinase (PRKA) anchor protein 2 (Akap2), transcript variant 3, mRNA.
1828	NTRK2	R1ML0 RFL+	R2ML0 RFL+	-0.0536842	0.351482	0.684426	0.822076	0.0911844	0.00379491	0.964433	0.228045	0.0155555	ILMN_3138904	Mus musculus neurotrophic tyrosine kinase, receptor, type 2 (Ntrk2), transcript variant 1, mRNA.
1829	PGAM1	R1ML0 RFL+	R2ML+ RFL+	0.100835	0.298096	0.228735	0.126379	6.691e-05	0.00033121	0.667182	0.00089732	0.00206431	ILMN_2856157	Mus musculus phosphoglycerate mutase 1 (Pgam1), mRNA.
1830	TKT	R1ML0 RFL0	R2ML+ RFL0	0.31012	0.35593	0.32036	0.00390704	0.00516832	0.0234834	0.282815	0.0289066	0.0674099	ILMN_2607880	Mus musculus transketolase (Tkt), mRNA.
1831	GSTM2	R1ML0 RFL+	R2ML0 RFL+	0.332383	0.39536	0.669033	0.0878245	0.0661627	0.0004672	0.621574	0.182227	0.0027536	ILMN_2862470	Mus musculus glutathione S-transferase, mu 2 (Gstm2), mRNA.
1832	TMEM14C	R1ML0 RFL0	R2ML+ RFL0	0.0776391	0.155044	0.145304	0.368024	0.00285934	0.0397368	0.830482	0.0183967	0.100951	ILMN_2435206	Mus musculus transmembrane protein 14C (Tmem14c), mRNA.
1833	PKLR	R1ML0 RFL+	R2ML0 RFL+	-0.00493985	0.346298	0.489717	0.98256	0.116045	0.00827508	0.996774	0.267852	0.0294481	ILMN_2704285	Mus musculus pyruvate kinase liver and red blood cell (Pklr), mRNA.
1834	PKLR	R1ML0 RFL+	R2ML0 RFL+	-0.054797	0.356965	0.615557	0.773845	0.0420826	0.00037209	0.95501	0.132808	0.0022777	ILMN_2944041	Mus musculus pyruvate kinase liver and red blood cell (Pklr), mRNA.
1835	THRSP	R1ML0 RFL0	R2ML+ RFL0	0.108714	1.14017	0.861899	0.794139	0.00100228	0.0298718	0.959568	0.00826829	0.0813066	ILMN_1256775	Mus musculus thyroid hormone responsive SPOT14 homolog (Rattus) (Thrsp), mRNA.
1836	NGFB	R1ML0 RFL0	R2ML+ RFL0	0.0658872	0.161316	0.137732	0.250526	0.00036538	0.00040286	0.763716	0.00366331	0.00243299	ILMN_2937596	Mus musculus nerve growth factor, beta (Ngfb), mRNA.
1837	UHRF1BP1	R1ML0 RFL+	R2ML+ RFL+	0.0191504	0.233246	0.195577	0.656713	8.745e-05	4.5e-07	0.927393	0.0011287	8.56e-06	ILMN_2899133	Mus musculus RIKEN cDNA F830021D11 gene (F830021D11Rik), mRNA.
1838	XKR8	R1ML0 RFL+	R2ML+ RFL+	-0.0398496	0.211912	0.236122	0.654524	9.123e-05	0.00217858	0.926805	0.00117038	0.00982329	ILMN_2662990	Mus musculus X Kell blood group precursor related family member 8 homolog (Xkr8), mRNA.
1839	BC004004	R1ML0 RFL0	R2ML+ RFL0	-0.0509098	0.156781	0.13189	0.344313	0.00027504	0.0088128	0.817352	0.00290736	0.0310138	ILMN_1252183	Mus musculus cDNA sequence BC004004 (BC004004), mRNA.
1840	IGF2R	R1ML0 RFL+	R2ML0 RFL+	0.0126391	0.178044	0.247881	0.859559	0.0368322	0.00127049	0.972247	0.121017	0.0062748	ILMN_2931096	Mus musculus insulin-like growth factor 2 receptor (Igf2r), mRNA.
1841	IGF2R	R1ML0 RFL+	R2ML0 RFL+	-0.0851805	0.161272	0.199452	0.187669	0.0285652	0.000741	0.714652	0.100443	0.00400871	ILMN_2931095	Mus musculus insulin-like growth factor 2 receptor (Igf2r), mRNA.
1842	LCMT1	R1ML0 RFL0	R2ML+ RFL0	0.0348947	0.174395	0.081372	0.269724	0.00781996	0.0160009	0.775496	0.03908	0.0498213	ILMN_2758728	Mus musculus leucine carboxyl methyltransferase 1 (Lcmt1), mRNA.
1843	LDLR	R1ML0 RFL0	R2ML+ RFL0	-0.0533684	0.325465	0.163033	0.559983	0.00858688	0.0288957	0.901436	0.0417832	0.0792965	ILMN_1221255
1844	PACSIN2	R1ML0 RFL+	R2ML+ RFL+	-0.0452105	0.217956	0.17572	0.40578	7.683e-05	5.055e-05	0.847886	0.00101354	0.00042657	ILMN_2712697
1845	RAD23A	R1ML0 RFL+	R2ML+ RFL+	0.0423083	0.287904	0.219857	0.488304	6e-07	3.188e-05	0.881235	1.57e-05	0.00029218	ILMN_1216295	Mus musculus RAD23a homolog (S. cerevisiae) (Rad23a), mRNA.
1846	1110008P14RIK	R1ML0 RFL+	R2ML0 RFL+	0.046594	-0.00192982	0.281887	0.620302	0.977007	0.00253805	0.917983	0.987856	0.0111374	ILMN_1225594	Mus musculus RIKEN cDNA 1110008P14 gene (1110008P14Rik), mRNA.
1847	DCTN2	R1ML0 RFL+	R2ML+ RFL+	0.091985	0.264009	0.201065	0.0634779	2.92e-06	0.00073565	0.577082	6.327e-05	0.00398357	ILMN_2859659	Mus musculus dynactin 2 (Dctn2), mRNA.
1848	DPP3	R1ML0 RFL+	R2ML0 RFL+	0.172519	0.146281	0.298551	0.0404733	0.0344951	6.85e-06	0.522001	0.115389	8.167e-05	ILMN_2751925	Mus musculus dipeptidylpeptidase 3 (Dpp3), mRNA.
1849	LTBR	R1ML0 RFL+	R2ML+ RFL+	0.142617	0.25064	0.367405	0.149044	4.34e-06	9.6e-07	0.686405	8.978e-05	1.609e-05	ILMN_2757582	Mus musculus lymphotoxin B receptor (Ltbr), mRNA.
1850	TM9SF4	R1ML0 RFL+	R2ML+ RFL+	0.126684	0.211184	0.338161	0.167384	6.8e-07	2.4e-07	0.700884	1.762e-05	5.14e-06	ILMN_1220640	Mus musculus transmembrane 9 superfamily protein member 4 (Tm9sf4), mRNA.
1851	TRPC4AP	R1ML0 RFL+	R2ML+ RFL+	0.00833835	0.312719	0.331658	0.91157	4.196e-05	1.8e-07	0.98318	0.00060818	4.08e-06	ILMN_2940595	Mus musculus transient receptor potential cation channel, subfamily C, member 4 associated protein (Trpc4ap), mRNA.
1852	FXC1	R1ML0 RFL+	R2ML+ RFL+	-0.0448045	0.158219	0.321589	0.595573	0.00732235	4.67e-06	0.909489	0.0372955	5.935e-05	ILMN_2626653	Mus musculus fractured callus expressed transcript 1 (Fxc1), mRNA.
1853	JOSD2	R1ML0 RFL+	R2ML0 RFL+	0.041391	0.156105	0.387051	0.682576	0.144122	0.00013282	0.932242	0.30988	0.00096712	ILMN_2667614	Mus musculus Josephin domain containing 2 (Josd2), mRNA.
1854	CC2D1B	R1ML0 RFL+	R2ML+ RFL+	0.0591955	0.211553	0.16928	0.353055	0.00619197	0.00103402	0.821888	0.0330252	0.00529412	ILMN_2731197	Mus musculus coiled-coil and C2 domain containing 1B (Cc2d1b), mRNA.
1855	SLC35C2	R1ML0 RFL+	R2ML0 RFL+	0.0550752	0.152623	0.305339	0.49891	0.117919	0.00022089	0.885784	0.2708	0.00146898	ILMN_2729374	Mus musculus solute carrier family 35, member C2 (Slc35c2), mRNA.
1856	RRBP1	R1ML0 RFL+	R2ML+ RFL+	0.299917	0.385798	0.299613	0.0451322	4.81e-05	0.0104716	0.536182	0.00068477	0.0356505	ILMN_2597686
1857	TMEM180	R1ML0 RFL0	R2ML+ RFL0	0.0584511	0.299237	0.148515	0.354829	0.00060596	0.0275592	0.821902	0.0055081	0.076371	ILMN_2709279
1858	CDCP1	R1ML0 RFL+	R2ML0 RFL+	0.155782	0.0627105	0.162771	0.0362273	0.134677	0.00553522	0.505118	0.296048	0.0212423	ILMN_2987826	Mus musculus CUB domain containing protein 1 (Cdcp1), mRNA.
1859	CXX1B	R1ML0 RFL+	R2ML0 RFL+	0.134444	0.0891579	0.157173	0.0193777	0.0775164	0.00113826	0.429266	0.203758	0.0057162	ILMN_3084160	Mus musculus CAAX box 1 homolog B (human) (Cxx1b), mRNA.
1860	5930434B04RIK	R1ML0 RFL+	R2ML+ RFL+	0.150902	0.299807	0.193842	0.0920669	0.0101207	0.00045042	0.626901	0.0470635	0.00267283	ILMN_1213573
1861	5930434B04RIK	R1ML0 RFL+	R2ML+ RFL+	0.0254737	0.288807	0.313899	0.693991	0.00189498	9.99e-06	0.934772	0.0135793	0.0001114	ILMN_3070533	Mus musculus RIKEN cDNA 5930434B04 gene (5930434B04Rik), mRNA.
1862	LRRC59	R1ML0 RFL+	R2ML+ RFL+	-0.0366541	0.429465	0.447902	0.677766	7.05e-06	2e-08	0.93224	0.00013742	7.2e-07	ILMN_2931384	Mus musculus leucine rich repeat containing 59 (Lrrc59), mRNA.
1863	TRABD	R1ML0 RFL+	R2ML+ RFL+	0.0532556	0.325018	0.436089	0.63702	0.0106211	1.8e-07	0.92337	0.0487812	4.08e-06	ILMN_2978533	Mus musculus TraB domain containing (Trabd), mRNA.
1864	SLC35A2	R1ML0 RFL+	R2ML+ RFL+	-0.0173158	0.177184	0.306994	0.621402	8.715e-05	0	0.91808	0.00112697	1.8e-07	ILMN_2970345	Mus musculus solute carrier family 35 (UDP-galactose transporter), member 2 (Slc35a2), mRNA.
1865	STX5A	R1ML0 RFL+	R2ML+ RFL+	0.0849474	0.266947	0.24114	0.141274	0.00307	3.845e-05	0.68341	0.0193785	0.00034039	ILMN_1255725	Mus musculus syntaxin 5A (Stx5a), mRNA.
1866	COPG	R1ML0 RFL+	R2ML+ RFL+	0.199256	0.468184	0.328321	0.00130277	6.62e-06	2.31e-06	0.196474	0.00012979	3.31e-05	ILMN_2596412
1867	SND1	R1ML0 RFL+	R2ML+ RFL+	0.025	0.282167	0.203464	0.660929	2.831e-05	0.00024601	0.928876	0.00044177	0.00160651	ILMN_2440803
1868	INTS5	R1ML0 RFL+	R2ML+ RFL+	0.0638571	0.214833	0.185262	0.182046	0.00066126	8.295e-05	0.711243	0.00593265	0.00064929	ILMN_2952587	Mus musculus integrator complex subunit 5 (Ints5), mRNA.
1869	PNPLA6	R1ML0 RFL+	R2ML0 RFL+	0.112158	0.217991	0.16742	0.181511	0.0121548	0.000179	0.711141	0.0536853	0.00123547	ILMN_2855515	Mus musculus patatin-like phospholipase domain containing 6 (Pnpla6), mRNA.
1870	TXLNA	R1ML0 RFL+	R2ML0 RFL+	0.0608722	0.170325	0.220625	0.337417	0.0355559	9.63e-06	0.813482	0.117967	0.00010806	ILMN_1218078
1871	CCDC123	R1ML0 RFL+	R2ML0 RFL+	0.11703	0.146316	0.217571	0.0909412	3.494e-05	2e-08	0.625011	0.00052687	6.8e-07	ILMN_2745151	Mus musculus coiled-coil domain containing 123 (Ccdc123), mRNA.
1872	EXTL3	R1ML0 RFL+	R2ML+ RFL+	0.203789	0.299623	0.421857	0.140883	0.00851359	0	0.68341	0.0415525	1.4e-07	ILMN_3001452	Mus musculus exostoses (multiple)-like 3 (Extl3), mRNA.
1873	UBE4B	R1ML0 RFL+	R2ML+ RFL+	0.148195	0.217719	0.345905	0.144636	5.17e-05	2.6e-07	0.68485	0.0007271	5.47e-06	ILMN_2935999	Mus musculus ubiquitination factor E4B, UFD2 homolog (S. cerevisiae) (Ube4b), mRNA.
1874	PARVA	R1ML0 RFL+	R2ML+ RFL+	0.0669774	0.38093	0.340107	0.388391	0.00193106	4.037e-05	0.841242	0.0137763	0.00035396	ILMN_1242472
1875	STX17	R1ML0 RFL+	R2ML+ RFL+	0.0866767	0.234772	0.229036	0.0764064	0.00083693	1.49e-06	0.601295	0.00715458	2.312e-05	ILMN_2730532
1876	PNPO	R1ML0 RFL+	R2ML0 RFL+	0.161887	0.182649	0.401173	0.036768	0.0312476	0.00014651	0.506882	0.107507	0.00104786	ILMN_2855792	Mus musculus pyridoxine 5'-phosphate oxidase (Pnpo), mRNA.
1877	2010005J08RIK	R1ML0 RFL+	R2ML+ RFL+	0.134774	0.228298	0.218994	0.142364	6.55e-06	4.624e-05	0.68355	0.00012874	0.00039729	ILMN_1226228
1878	DGAT1	R1ML0 RFL+	R2ML+ RFL+	0.130346	0.176965	0.336756	0.0544287	0.0013311	5e-08	0.559685	0.0103904	1.53e-06	ILMN_2807284	Mus musculus diacylglycerol O-acyltransferase 1 (Dgat1), mRNA.
1879	ZFAND2B	R1ML0 RFL+	R2ML0 RFL+	0.126827	0.183184	0.354119	0.0581876	0.101895	1.673e-05	0.567645	0.245789	0.0001707	ILMN_2763951	Mus musculus zinc finger, AN1 type domain 2B (Zfand2b), mRNA.
1880	UBXN6	R1ML0 RFL+	R2ML0 RFL+	0.0720602	0.119298	0.300051	0.351754	0.0668528	1.486e-05	0.821206	0.183615	0.00015458	ILMN_2876579	Mus musculus UBX domain containing 1 (Ubxd1), mRNA.
1881	ELOF1	R1ML0 RFL+	R2ML0 RFL+	-0.0087218	0.128088	0.235479	0.882258	0.084696	1.404e-05	0.977312	0.216647	0.00014718	ILMN_1231371	Mus musculus elongation factor 1 homolog (ELF1, S. cerevisiae) (Elof1), mRNA.
1882	HSF4	R1ML0 RFL+	R2ML0 RFL+	0.0283459	0.108965	0.275899	0.36831	0.0300698	2.477e-05	0.830482	0.104289	0.00023599	ILMN_2746797
1883	POLRMT	R1ML0 RFL+	R2ML0 RFL+	-0.000661654	0.0932193	0.220283	0.991938	0.0167253	0.0008199	0.998935	0.0678649	0.00435222	ILMN_2717777	Mus musculus polymerase (RNA) mitochondrial (DNA directed) (Polrmt), mRNA.
1884	TRMT1	R1ML0 RFL+	R2ML+ RFL+	0.0496842	0.171851	0.253402	0.479743	0.00071996	5.433e-05	0.876864	0.00633861	0.00045341	ILMN_2719460	Mus musculus TRM1 tRNA methyltransferase 1 homolog (S. cerevisiae) (Trmt1), mRNA.
1885	2310033P09RIK	R1ML0 RFL+	R2ML+ RFL+	0.0420602	0.182132	0.223491	0.480844	0.00086008	0.00016616	0.877304	0.00730146	0.00116058	ILMN_1232120
1886	YEATS4	R1ML0 RFL+	R2ML0 RFL+	0.13003	0.140649	0.283071	0.156154	0.0191814	0.00017166	0.693011	0.0748867	0.00119478	ILMN_3002284	Mus musculus YEATS domain containing 4 (Yeats4), mRNA.
1887	CDK9	R1ML0 RFL+	R2ML+ RFL+	0.0282932	0.256412	0.228935	0.695989	0.00028213	1.54e-05	0.935482	0.00297126	0.00015917	ILMN_2683933
1888	TOP3B	R1ML0 RFL+	R2ML+ RFL+	-0.00975188	0.254439	0.196339	0.838719	0.00090533	7.377e-05	0.96748	0.00761511	0.00058948	ILMN_2432458	Mus musculus topoisomerase (DNA) III beta (Top3b), mRNA.
1889	5830457O10RIK	R1ML0 RFL+	R2ML+ RFL+	0.112797	0.413035	0.34592	0.0679289	6.676e-05	0	0.583659	0.00089583	2e-08	ILMN_2697766	Mus musculus RIKEN cDNA 5830457O10 gene (5830457O10Rik), mRNA.
1890	ATP9B	R1ML0 RFL+	R2ML+ RFL+	0.00494737	0.194614	0.266568	0.930589	0.00691366	0	0.986728	0.0357609	1.1e-07	ILMN_3002875	Mus musculus ATPase, class II, type 9B (Atp9b), mRNA.
1891	MAP2K7	R1ML0 RFL+	R2ML+ RFL+	0.00839098	0.255605	0.375991	0.903128	0.00053713	0	0.982181	0.00500278	3e-08	ILMN_3028981	Mus musculus mitogen activated protein kinase kinase 7 (Map2k7), transcript variant 1, mRNA.
1892	ZMIZ2	R1ML0 RFL+	R2ML+ RFL+	0.0206316	0.189965	0.383351	0.724303	4.552e-05	0	0.942708	0.00065234	0	ILMN_3163539	Mus musculus zinc finger, MIZ-type containing 2 (Zmiz2), transcript variant 2, mRNA.
1893	TRIM28	R1ML0 RFL+	R2ML+ RFL+	0.10588	0.368237	0.432917	0.0357612	0.00107908	0	0.503191	0.00877223	0	ILMN_1227225	Mus musculus tripartite motif protein 28 (Trim28), mRNA.
1894	EIF2AK1	R1ML0 RFL+	R2ML+ RFL+	0.178406	0.251763	0.288009	0.0217802	0.00643823	1.2e-07	0.438382	0.0338953	2.93e-06	ILMN_2709397
1895	XPO6	R1ML0 RFL+	R2ML+ RFL+	0.162594	0.18557	0.236295	0.0075895	0.00973643	1e-08	0.3407	0.0458582	2.6e-07	ILMN_2923599	Mus musculus exportin 6 (Xpo6), mRNA.
1896	ATP13A1	R1ML0 RFL+	R2ML+ RFL+	0.0450301	0.185816	0.216848	0.367592	0.000398	8.4e-07	0.830482	0.00392761	1.439e-05	ILMN_1250382	Mus musculus ATPase type 13A1 (Atp13a1), mRNA.
1897	NR1H2	R1ML0 RFL+	R2ML+ RFL+	0.0478195	0.201105	0.299318	0.47546	0.00745341	1e-08	0.875459	0.0377474	3.2e-07	ILMN_3085126	Mus musculus nuclear receptor subfamily 1, group H, member 2 (Nr1h2), mRNA.
1898	NR1H2	R1ML0 RFL+	R2ML0 RFL+	0.0820301	0.144982	0.289577	0.198528	0.00085714	2e-08	0.722884	0.00728611	6e-07	ILMN_3014084	Mus musculus nuclear receptor subfamily 1, group H, member 2 (Nr1h2), mRNA.
1899	STRN4	R1ML0 RFL+	R2ML0 RFL+	0.0949323	0.169623	0.287006	0.241616	0.012532	1.6e-07	0.758136	0.0548987	3.78e-06	ILMN_3159156
1900	TFIP11	R1ML0 RFL+	R2ML0 RFL+	0.155	0.2035	0.185283	0.0753825	0.0119557	8.13e-06	0.599004	0.053043	9.426e-05	ILMN_2961179	Mus musculus tuftelin interacting protein 11 (Tfip11), mRNA.
1901	SETD1A	R1ML0 RFL+	R2ML+ RFL+	0.0784135	0.207675	0.229143	0.212867	0.00229822	2.3e-07	0.733387	0.0156692	4.9e-06	ILMN_1247099
1902	SPEN	R1ML0 RFL+	R2ML+ RFL+	0.0708271	0.177351	0.224637	0.0112564	0.00638351	2.8e-07	0.370072	0.0337039	5.72e-06	ILMN_2592059
1903	WBP7	R1ML0 RFL+	R2ML+ RFL+	0.0710827	0.222368	0.221595	0.170339	0.0001703	1.57e-06	0.702721	0.00196557	2.422e-05	ILMN_2699833
1904	CARM1	R1ML0 RFL+	R2ML+ RFL+	-0.024594	0.186763	0.367446	0.665012	0.00242045	0	0.929977	0.0162695	8e-08	ILMN_3003076	Mus musculus coactivator-associated arginine methyltransferase 1 (Carm1), mRNA.
1905	FZR1	R1ML0 RFL+	R2ML+ RFL+	0.0665263	0.191693	0.317973	0.059778	0.00549212	0	0.569808	0.0302921	1e-08	ILMN_2629971	Mus musculus fizzy/cell division cycle 20 related 1 (Drosophila) (Fzr1), mRNA.
1906	NRBP1	R1ML0 RFL+	R2ML0 RFL+	0.0026391	0.169044	0.249042	0.965012	0.0148342	0	0.992961	0.0621817	8e-08	ILMN_1229702	Mus musculus nuclear receptor binding protein 1 (Nrbp1), mRNA.
1907	VPS16	R1ML0 RFL+	R2ML+ RFL+	0.0694586	0.190982	0.228131	0.0111908	6.87e-06	0	0.369702	0.00013444	7e-08	ILMN_2893683	Mus musculus vacuolar protein sorting 16 (yeast) (Vps16), mRNA.
1908	PRKAG1	R1ML0 RFL+	R2ML0 RFL+	-0.0522932	0.0685877	0.283083	0.42063	0.307983	8.52e-06	0.854528	0.501528	9.788e-05	ILMN_2771396
1909	RBM42	R1ML0 RFL+	R2ML+ RFL+	-0.0717368	0.20093	0.399717	0.352215	0.00048446	0	0.821459	0.00460571	1e-08	ILMN_2709456	Mus musculus RIKEN cDNA 3100004P22 gene (3100004P22Rik), mRNA.
1910	UNC45A	R1ML0 RFL+	R2ML+ RFL+	-0.00549624	0.290623	0.302077	0.911498	3e-08	1.33e-05	0.98318	1.14e-06	0.0001407	ILMN_1255175	Mus musculus unc-45 homolog A (C. elegans) (Unc45a), mRNA.
1911	AP2A1	R1ML0 RFL+	R2ML+ RFL+	0.108008	0.279746	0.223563	0.0591668	7.278e-05	6.65e-06	0.569563	0.00096705	7.952e-05	ILMN_3143246	Mus musculus adaptor protein complex AP-2, alpha 1 subunit (Ap2a1), transcript variant 2, mRNA.
1912	USP19	R1ML0 RFL+	R2ML0 RFL+	0.0810602	0.164298	0.274101	0.241797	0.0295735	4.95e-06	0.758136	0.103058	6.236e-05	ILMN_2874414	Mus musculus ubiquitin specific peptidase 19 (Usp19), mRNA.
1913	ZFP653	R1ML0 RFL+	R2ML0 RFL+	-0.00236842	0.130798	0.249842	0.939072	0.00447082	5.128e-05	0.987856	0.0259925	0.00043202	ILMN_2755621	Mus musculus zinc finger protein 653 (Zfp653), mRNA.
1914	AP1M1	R1ML0 RFL+	R2ML0 RFL+	-0.0939323	0.0300439	0.326753	0.0578667	0.555534	2.818e-05	0.567645	0.720704	0.00026263	ILMN_2984647	Mus musculus adaptor-related protein complex AP-1, mu subunit 1 (Ap1m1), mRNA.
1915	FBXW8	R1ML0 RFL+	R2ML0 RFL+	-0.0309173	0.163868	0.235557	0.581096	0.0202905	1.977e-05	0.906585	0.0780503	0.00019611	ILMN_1251236
1916	DMAP1	R1ML0 RFL+	R2ML0 RFL+	-0.0078797	0.171763	0.197798	0.853352	0.0175323	0.00158176	0.970973	0.070362	0.00751044	ILMN_2663674	Mus musculus DNA methyltransferase 1-associated protein 1 (Dmap1), mRNA.
1917	PCNX	R1ML0 RFL+	R2ML0 RFL+	0.0348872	0.132816	0.280289	0.441841	0.0122333	2.794e-05	0.862568	0.0539211	0.0002607	ILMN_2750767
1918	PIGO	R1ML0 RFL+	R2ML0 RFL+	-0.0328797	0.0577632	0.234202	0.706951	0.179368	0.0001104	0.939032	0.356806	0.00082828	ILMN_2997002	Mus musculus phosphatidylinositol glycan anchor biosynthesis, class O (Pigo), mRNA.
1919	CYB561D1	R1ML0 RFL+	R2ML0 RFL+	-0.0598346	0.0859035	0.167452	0.0719195	0.0830714	0.00055348	0.592534	0.213961	0.00315639	ILMN_3078306	Mus musculus cytochrome b-561 domain containing 1 (Cyb561d1), mRNA.
1920	POLR3B	R1ML0 RFL+	R2ML0 RFL+	-0.0457368	0.161263	0.163729	0.424528	0.0310505	0.00018023	0.856607	0.106943	0.00124366	ILMN_2732627	Mus musculus polymerase (RNA) III (DNA directed) polypeptide B (Polr3b), mRNA.
1921	SBNO1	R1ML0 RFL0	R2ML+ RFL0	0.00572932	0.152325	0.135592	0.853001	0.00068076	2.466e-05	0.970973	0.00607202	0.00023513	ILMN_3154129	Mus musculus sno, strawberry notch homolog 1 (Drosophila) (Sbno1), mRNA.
1922	BC024868	R1ML0 RFL+	R2ML+ RFL+	0.0592105	0.300711	0.246994	0.247187	0.00235176	7.192e-05	0.761546	0.0159221	0.00057667	ILMN_2844153	Mus musculus cDNA sequence BC024868 (BC024868), mRNA.
1923	VPS72	R1ML0 RFL+	R2ML+ RFL+	-0.0278872	0.214684	0.223705	0.668583	0.00030375	2.121e-05	0.929977	0.00315371	0.00020793	ILMN_1225831
1924	CLPTM1	R1ML0 RFL+	R2ML+ RFL+	0.051594	0.26907	0.261631	0.530371	0.00045319	1.984e-05	0.893235	0.00437314	0.00019658	ILMN_2617425
1925	UPF1	R1ML0 RFL+	R2ML0 RFL+	-0.00361654	0.143693	0.321652	0.963965	0.0203659	2e-07	0.992961	0.0781809	4.35e-06	ILMN_2740755
1926	DAPK3	R1ML0 RFL+	R2ML+ RFL+	-0.0464887	0.220868	0.23658	0.396951	0.00319612	0.00017245	0.845152	0.0200105	0.00119834	ILMN_2705227	Mus musculus death-associated kinase 3 (Dapk3), mRNA.
1927	TAF10	R1ML0 RFL+	R2ML+ RFL+	-0.066188	0.32986	0.244295	0.335015	3.09e-05	0.00013148	0.812542	0.0004737	0.00096008	ILMN_2995129	Mus musculus TAF10 RNA polymerase II, TATA box binding protein (TBP)-associated factor (Taf10), mRNA.
1928	PIK3R2	R1ML0 RFL0	R2ML+ RFL0	0.0375789	0.196412	0.130607	0.270709	0.00620256	0.00408454	0.775872	0.0330679	0.016537	ILMN_2732317	Mus musculus phosphatidylinositol 3-kinase, regulatory subunit, polypeptide 2 (p85 beta) (Pik3r2), mRNA.
1929	CSNK1G2	R1ML0 RFL+	R2ML+ RFL+	0.108256	0.186018	0.298339	0.173379	2.666e-05	3e-08	0.70403	0.00042	9.7e-07	ILMN_2875163	Mus musculus casein kinase 1, gamma 2 (Csnk1g2), mRNA.
1930	EIF4G1	R1ML0 RFL+	R2ML0 RFL+	0.0612782	0.208921	0.297702	0.403388	0.0143197	1.571e-05	0.846966	0.0604624	0.00016182	ILMN_3159387	Mus musculus eukaryotic translation initiation factor 4, gamma 1 (Eif4g1), transcript variant 1, mRNA.
1931	INO80B	R1ML0 RFL+	R2ML0 RFL+	0.0475714	0.179167	0.314321	0.41721	0.0253475	6.35e-06	0.852961	0.0918564	7.641e-05	ILMN_2915166	Mus musculus zinc finger, HIT type 4 (Znhit4), mRNA.
1932	STK11	R1ML0 RFL+	R2ML0 RFL+	0.0516165	0.17264	0.349479	0.464355	0.0117469	2.07e-06	0.871677	0.0523882	3.041e-05	ILMN_2591570	Mus musculus serine/threonine kinase 11 (Stk11), mRNA.
1933	PTMS	R1ML0 RFL+	R2ML0 RFL+	0.0433759	0.182947	0.350128	0.687154	0.172354	0.00049058	0.933207	0.348326	0.0028625	ILMN_2918838	Mus musculus parathymosin (Ptms), mRNA.
1934	TTC36	R1ML0 RFL+	R2ML0 RFL+	0.00427068	0.0416754	0.260405	0.956638	0.664969	0.00913313	0.991314	0.802302	0.0319442	ILMN_2670057	Mus musculus cDNA sequence BC021608 (BC021608), mRNA.
1935	UPF1	R1ML0 RFL+	R2ML0 RFL+	-0.0197368	0.0990965	0.189753	0.71035	0.00841981	0.00010054	0.939807	0.0412122	0.00076407	ILMN_2604108
1936	DHRSX	R1ML0 RFL+	R2ML+ RFL+	-0.0197519	0.184272	0.229461	0.714493	0.00023858	5.038e-05	0.940832	0.00258901	0.0004253	ILMN_2436890
1937	IL17RC	R1ML0 RFL+	R2ML0 RFL+	0.0664962	0.175544	0.24931	0.471144	0.0247027	0.00349374	0.873623	0.0901045	0.0145203	ILMN_2695344	Mus musculus interleukin 17 receptor C (Il17rc), mRNA.
1938	ZFP771	R1ML0 RFL0	R2ML+ RFL0	0.0466617	0.226447	0.130554	0.388664	0.00736687	0.0290164	0.841265	0.0374096	0.0795428	ILMN_2848353	Mus musculus zinc finger protein 771 (Zfp771), mRNA.
1939	LOC100044324	R1ML0 RFL+	R2ML0 RFL+	-0.0788195	0.100561	0.213881	0.0641821	0.0694716	7.871e-05	0.578291	0.188851	0.00062082	ILMN_2683675	Mus musculus euchromatic histone methyltransferase 1 (Ehmt1), transcript variant 2, mRNA.
1940	HMG20B	R1ML0 RFL+	R2ML+ RFL+	-0.0573459	0.206868	0.169033	0.184869	0.00740662	0.00084403	0.711984	0.037555	0.00445925	ILMN_1232386	Mus musculus high mobility group 20 B (Hmg20b), mRNA.
1941	SCRIB	R1ML0 RFL+	R2ML0 RFL+	0.00260902	0.169228	0.25756	0.952733	0.0163164	9.039e-05	0.990326	0.0667437	0.00069687	ILMN_2828731	Mus musculus scribbled homolog (Drosophila) (Scrib), mRNA.
1942	TJAP1	R1ML0 RFL+	R2ML+ RFL+	0.0444436	0.183158	0.157973	0.102592	1.24e-06	1.347e-05	0.641653	2.956e-05	0.00014214	ILMN_2934448	Mus musculus tight junction associated protein 1 (Tjap1), mRNA.
1943	NR2F6	R1ML0 RFL+	R2ML+ RFL+	-0.0028797	0.19493	0.210423	0.956718	0.00300722	5.797e-05	0.991314	0.0190995	0.00047989	ILMN_1215135
1944	FLII	R1ML0 RFL+	R2ML+ RFL+	0.0309474	0.323281	0.31892	0.661205	5.598e-05	2.04e-06	0.928876	0.00077589	3.016e-05	ILMN_2980063	Mus musculus flightless I homolog (Drosophila) (Flii), mRNA.
1945	NPEPL1	R1ML0 RFL+	R2ML+ RFL+	-0.0881654	0.283096	0.285092	0.231293	0.00055101	4.882e-05	0.748893	0.00510058	0.00041462	ILMN_2896049	Mus musculus aminopeptidase-like 1 (Npepl1), mRNA.
1946	LOC100045300	R1ML0 RFL+	R2ML+ RFL+	-0.013812	0.377474	0.305923	0.854765	0.00028684	8.604e-05	0.971225	0.00301346	0.00066897	ILMN_2639703	Mus musculus Dr1 associated protein 1 (negative cofactor 2 alpha) (Drap1), mRNA.
1947	UBE2M	R1ML0 RFL+	R2ML+ RFL+	-0.0761654	0.330596	0.355527	0.317873	1.5e-07	2e-08	0.802159	4.6e-06	7.9e-07	ILMN_2462202	Mus musculus ubiquitin-conjugating enzyme E2M (UBC12 homolog, yeast) (Ube2m), mRNA.
1948	SCARF1	R1ML0 RFL+	R2ML+ RFL+	-0.0349699	0.253316	0.269732	0.41464	0.00993426	3.5e-06	0.851921	0.0465162	4.654e-05	ILMN_2820703	Mus musculus scavenger receptor class F, member 1 (Scarf1), mRNA.
1949	GTF3A	R1ML0 RFL0	R2ML+ RFL0	-0.0904511	0.283096	0.136905	0.0754087	9.13e-06	0.0191712	0.599004	0.00017046	0.0574778	ILMN_2670727	Mus musculus general transcription factor III A (Gtf3a), mRNA.
1950	PIBF1	R1ML0 RFL0	R2ML+ RFL0	-0.00895489	0.18114	0.118289	0.736929	3.41e-05	0.00056496	0.945876	0.00051578	0.003214	ILMN_3115640	Mus musculus DNA segment, Chr 14, ERATO Doi 581, expressed (D14Ertd581e), transcript variant 1, mRNA.
1951	MGAT4B	R1ML0 RFL0	R2ML+ RFL0	0.0868421	0.276009	0.12528	0.182572	0.00116271	0.0642579	0.711984	0.00932524	0.145074	ILMN_2609073	Mus musculus mannoside acetylglucosaminyltransferase 4, isoenzyme B (Mgat4b), mRNA.
1952	RBCK1	R1ML0 RFL+	R2ML0 RFL+	-0.0386692	0.203807	0.178429	0.37083	0.0181987	0.00051964	0.832431	0.0721482	0.00299801	ILMN_1214070	Mus musculus RanBP-type and C3HC4-type zinc finger containing 1 (Rbck1), mRNA.
1953	CPSF4	R1ML0 RFL+	R2ML+ RFL+	0.119436	0.151579	0.304342	0.0652489	0.00026241	1.1e-07	0.578699	0.00280262	2.74e-06	ILMN_2722778	Mus musculus cleavage and polyadenylation specific factor 4 (Cpsf4), mRNA.
1954	GTF2H4	R1ML0 RFL+	R2ML+ RFL+	0.0364737	0.151307	0.231247	0.660676	0.010677	0.00014261	0.928876	0.0488894	0.00102477	ILMN_2997308	Mus musculus general transcription factor II H, polypeptide 4 (Gtf2h4), mRNA.
1955	SLC12A9	R1ML0 RFL+	R2ML0 RFL+	0.0785714	0.129333	0.230932	0.155136	0.0114836	2.859e-05	0.692348	0.051535	0.00026605	ILMN_2998026	Mus musculus solute carrier family 12 (potassium/chloride transporters), member 9 (Slc12a9), mRNA.
1956	KLHDC3	R1ML0 RFL+	R2ML0 RFL+	0.0547368	0.0439035	0.26475	0.347757	0.234428	3.471e-05	0.818868	0.422832	0.00031315	ILMN_2851023	Mus musculus kelch domain containing 3 (Klhdc3), mRNA.
1957	ABCB8	R1ML0 RFL+	R2ML0 RFL+	-0.0839098	0.0869474	0.198836	0.0701587	0.127549	0.00043183	0.590717	0.285757	0.00258065	ILMN_2864834	Mus musculus ATP-binding cassette, sub-family B (MDR/TAP), member 8 (Abcb8), mRNA.
1958	ABCB8	R1ML0 RFL+	R2ML0 RFL+	0.0425338	0.0434386	0.223562	0.27125	0.216801	8.9e-07	0.775946	0.401988	1.504e-05	ILMN_2590908	Mus musculus ATP-binding cassette, sub-family B (MDR/TAP), member 8 (Abcb8), mRNA.
1959	ABCB8	R1ML0 RFL+	R2ML0 RFL+	-0.0451504	0.0534211	0.218973	0.278689	0.0991974	9.15e-06	0.780844	0.24155	0.00010378	ILMN_2663015	Mus musculus ATP-binding cassette, sub-family B (MDR/TAP), member 8 (Abcb8), mRNA.
1960	2310067B10RIK	R1ML0 RFL+	R2ML0 RFL+	0.101316	0.255482	0.166149	0.269622	0.0114079	0.00139773	0.775496	0.0513306	0.00678198	ILMN_1245489
1961	NUB1	R1ML0 RFL+	R2ML0 RFL+	0.0215865	0.209825	0.19936	0.76705	0.0119786	7.01e-06	0.952989	0.0531279	8.32e-05	ILMN_2765080
1962	SAPS1	R1ML0 RFL+	R2ML+ RFL+	0.0418496	0.178588	0.252086	0.526382	0.00036691	3.7e-07	0.892241	0.00367729	7.31e-06	ILMN_2603693
1963	UBTF	R1ML0 RFL+	R2ML0 RFL+	0.0193609	0.120623	0.213396	0.833708	0.0106759	6.09e-06	0.966211	0.0488894	7.391e-05	ILMN_1255927
1964	POU2F1	R1ML0 RFL0	R2ML+ RFL0	0.0955338	0.194939	0.0825625	0.108719	0.00216735	0.0143257	0.6492	0.0150526	0.0455491	ILMN_2663367
1965	2410016O06RIK	R1ML0 RFL0	R2ML+ RFL0	0.0953684	0.178535	0.139202	0.0594373	0.0082008	0.00108699	0.569563	0.0404406	0.00552133	ILMN_2972325	Mus musculus RIKEN cDNA 2410016O06 gene (2410016O06Rik), mRNA.
1966	KHSRP	R1ML0 RFL+	R2ML+ RFL+	0.0791654	0.314237	0.238738	0.388762	0.00389631	2.85e-06	0.841265	0.0233715	3.917e-05	ILMN_3003567	Mus musculus KH-type splicing regulatory protein (Khsrp), mRNA.
1967	ARS2	R1ML0 RFL+	R2ML+ RFL+	-0.0608346	0.289404	0.268964	0.405367	1.642e-05	1.623e-05	0.847886	0.00027798	0.00016625	ILMN_2698361	Mus musculus arsenate resistance protein 2 (Ars2), mRNA.
1968	ARS2	R1ML0 RFL+	R2ML+ RFL+	-0.0727068	0.248579	0.27814	0.318764	0.00012563	2e-08	0.80291	0.00153948	6.4e-07	ILMN_1242239	Mus musculus arsenate resistance protein 2 (Ars2), mRNA.
1969	BAT2	R1ML0 RFL+	R2ML+ RFL+	0.166962	0.400605	0.234071	0.00744784	1.064e-05	0.00029741	0.338738	0.00019356	0.00188355	ILMN_1254154
1970	PSME3	R1ML0 RFL+	R2ML+ RFL+	0.120992	0.378254	0.26236	0.11912	5.685e-05	1.69e-05	0.660071	0.00078499	0.00017212	ILMN_2729718
1971	SCAF1	R1ML0 RFL+	R2ML+ RFL+	0.0433985	0.293684	0.326476	0.518917	2.852e-05	4e-08	0.89165	0.00044329	1.14e-06	ILMN_2759669
1972	UBL7	R1ML0 RFL+	R2ML0 RFL+	0.0279925	0.175421	0.192185	0.599555	0.0126368	0.00045757	0.910835	0.0552353	0.00270784	ILMN_2972063	Mus musculus ubiquitin-like 7 (bone marrow stromal cell-derived) (Ubl7), mRNA.
1973	SLC4A2	R1ML0 RFL+	R2ML+ RFL+	0.0454135	0.532009	0.169164	0.291954	0	4.178e-05	0.787774	1.6e-07	0.00036497	ILMN_1239662	Mus musculus solute carrier family 4 (anion exchanger), member 2 (Slc4a2), mRNA.
1974	FBXO18	R1ML0 RFL+	R2ML+ RFL+	-0.0340677	0.277956	0.179598	0.357964	5.62e-06	4.727e-05	0.824542	0.00011283	0.00040368	ILMN_2710538	Mus musculus F-box protein 18 (Fbxo18), mRNA.
1975	TBC1D13	R1ML0 RFL+	R2ML+ RFL+	-0.0171429	0.311667	0.205238	0.665754	1.19e-06	8.823e-05	0.929977	2.869e-05	0.00068391	ILMN_1218901	Mus musculus TBC1 domain family, member 13 (Tbc1d13), mRNA.
1976	EPN1	R1ML0 RFL+	R2ML+ RFL+	0.0245113	0.231368	0.244021	0.679122	4e-08	1.58e-06	0.93224	1.4e-06	2.431e-05	ILMN_1250501
1977	SFRS4	R1ML0 RFL+	R2ML+ RFL+	0.00614286	0.2335	0.389893	0.925296	0.00484785	9e-08	0.985736	0.0275865	2.28e-06	ILMN_2944150	Mus musculus splicing factor, arginine/serine-rich 4 (SRp75) (Sfrs4), mRNA.
1978	GGA1	R1ML0 RFL+	R2ML+ RFL+	0.0636241	0.156386	0.151161	0.0933147	0.00299335	1.223e-05	0.629733	0.0190255	0.00013104	ILMN_1248850	Mus musculus golgi associated, gamma adaptin ear containing, ARF binding protein 1 (Gga1), mRNA.
1979	DDB1	R1ML0 RFL+	R2ML+ RFL+	0.123211	0.322044	0.293702	0.0728855	0.00105153	2.163e-05	0.59373	0.0085945	0.00021129	ILMN_2620930	Mus musculus damage specific DNA binding protein 1 (Ddb1), mRNA.
1980	RAPGEF1	R1ML0 RFL+	R2ML+ RFL+	0.147391	0.294105	0.23717	0.014225	8e-06	2.918e-05	0.3939	0.00015248	0.00027055	ILMN_3140516	Mus musculus Rap guanine nucleotide exchange factor (GEF) 1 (Rapgef1), transcript variant 2, mRNA.
1981	LETMD1	R1ML0 RFL0	R2ML+ RFL0	0.0513233	0.191395	0.148854	0.266127	7.1e-07	0.0004671	0.771614	1.824e-05	0.0027536	ILMN_2616215	Mus musculus LETM1 domain containing 1 (Letmd1), mRNA.
1982	FLOT2	R1ML0 RFL+	R2ML+ RFL+	0.0830226	0.21507	0.283268	0.163615	0.00106997	4.776e-05	0.699439	0.00871199	0.00040723	ILMN_1227357
1983	NUDC-PS1	R1ML0 RFL+	R2ML+ RFL+	0.0171805	0.246728	0.167	0.655786	1.2e-07	0.00061551	0.926989	3.83e-06	0.00345196	ILMN_2856861	Mus musculus nuclear distribution gene C homolog (Aspergillus), pseudogene 1 (Nudc-ps1) on chromosome 8.
1984	PTGES2	R1ML0 RFL+	R2ML0 RFL+	0.0163759	0.128281	0.189771	0.751453	0.0031564	0.00014471	0.948636	0.0198033	0.00103654	ILMN_2639527	Mus musculus prostaglandin E synthase 2 (Ptges2), mRNA.
1985	PPL	R1ML0 RFL+	R2ML0 RFL+	-0.00321053	0.0256228	0.175515	0.881369	0.499194	5.274e-05	0.977256	0.67568	0.00044219	ILMN_3076424	Mus musculus periplakin (Ppl), mRNA.
1986	RASL11B	R1ML0 RFL+	R2ML0 RFL+	-0.0332632	0.0909035	0.362071	0.563747	0.19946	8.413e-05	0.901861	0.382017	0.00065647	ILMN_2793062	Mus musculus RAS-like, family 11, member B (Rasl11b), mRNA.
1987	SALL1	R1ML0 RFL+	R2ML0 RFL+	0.0653684	-0.0254649	0.160387	0.482763	0.708921	0.0082142	0.878797	0.833088	0.029276	ILMN_2853800	Mus musculus sal-like 1 (Drosophila) (Sall1), mRNA.
1988	TMEM98	R1ML0 RFL+	R2ML0 RFL+	0.0634962	0.0845439	0.277589	0.690335	0.485197	0.00650997	0.933996	0.664612	0.0242796	ILMN_2658815	Mus musculus transmembrane protein 98 (Tmem98), mRNA.
1989	ELMO3	R1ML0 RFL+	R2ML0 RFL+	0.0137444	0.0523158	0.200756	0.810334	0.160784	0.00015468	0.962148	0.332931	0.00109586	ILMN_2693636	Mus musculus engulfment and cell motility 3, ced-12 homolog (C. elegans) (Elmo3), mRNA.
1990	REXO1	R1ML0 RFL+	R2ML0 RFL+	-0.0155188	0.0435526	0.173024	0.72094	0.387126	2.629e-05	0.942438	0.578202	0.00024753	ILMN_2592554
1991	OBFC2B	R1ML0 RFL+	R2ML+ RFL+	0.0473684	0.206035	0.380997	0.39596	0.00230702	4e-08	0.844798	0.0157151	1.16e-06	ILMN_2837156	Mus musculus oligonucleotide/oligosaccharide-binding fold containing 2B (Obfc2b), mRNA.
1992	OBFC2B	R1ML0 RFL+	R2ML0 RFL+	0.0374436	0.106158	0.26133	0.402823	0.0113407	1.9e-07	0.846966	0.0511239	4.19e-06	ILMN_2593852	Mus musculus oligonucleotide/oligosaccharide-binding fold containing 2B (Obfc2b), mRNA.
1993	OTTMUSG00000000421	R1ML0 RFL+	R2ML0 RFL+	-0.00718797	0.124526	0.20014	0.87627	0.0164557	1.05e-05	0.97605	0.0671127	0.00011584	ILMN_2824954	Mus musculus predicted gene, OTTMUSG00000000421 (OTTMUSG00000000421), mRNA.
1994	PRNPIP1	R1ML0 RFL+	R2ML0 RFL+	0.0625714	0.115333	0.250271	0.251551	0.00456079	1e-08	0.763947	0.0264318	3.8e-07	ILMN_2743837	Mus musculus prion protein interacting protein 1 (Prnpip1), mRNA.
1995	UBAP2L	R1ML0 RFL+	R2ML0 RFL+	0.0377444	0.195816	0.233268	0.318252	0.0121257	1.1e-07	0.802482	0.0536121	2.83e-06	ILMN_3153869	Mus musculus ubiquitin associated protein 2-like (Ubap2l), transcript variant 1, mRNA.
1996	GGA1	R1ML0 RFL+	R2ML0 RFL+	0.0179173	0.0544649	0.185351	0.753204	0.185096	1.01e-06	0.949329	0.364121	1.683e-05	ILMN_2894943	Mus musculus golgi associated, gamma adaptin ear containing, ARF binding protein 1 (Gga1), mRNA.
1997	RUVBL2	R1ML0 RFL+	R2ML+ RFL+	0.0304962	0.203377	0.178577	0.616929	0.00045577	0.00010654	0.917219	0.00438973	0.00080335	ILMN_2690410
1998	TBL3	R1ML0 RFL+	R2ML+ RFL+	0.0199474	0.225114	0.171932	0.673012	3.392e-05	5.943e-05	0.930692	0.00051416	0.00049026	ILMN_2616786	Mus musculus transducin (beta)-like 3 (Tbl3), mRNA.
1999	2400001E08RIK	R1ML0 RFL+	R2ML+ RFL+	0.146955	0.35136	0.316262	0.0560928	0.00266858	7.115e-05	0.563044	0.0174783	0.0005712	ILMN_2673380	Mus musculus RIKEN cDNA 2400001E08 gene (2400001E08Rik), mRNA.
[truncated: 5,297 more rows]

## Sheet: 2. IPA Rapa-2 Male|Control Male
Ingenuity Canonical Pathways	B-H p-value	Ratio Changed	Downregulated	Upregulated	No overlap with dataset	Molecules
Mitochondrial Dysfunction	2.0893e-07	0.312	32/192 (17%)	28/192 (15%)	132/192 (69%)	MAP2K4,NDUFA9,APH1B,NDUFB5,ATP5G2,NDUFB10,PDHA1,NDUFA5,MAOB,SOD2,GPD2,NDUFS6,ATP5J,CASP3,ATP5A1,BACE1,SDHC,MAPK12,COX7A1,NDUFB11,ATP5B,NDUFB2,COX6C,NDUFA4,HSD17B10,SDHB,UQCRH,COX6A1,PRDX5,RHOT2,TRAK1,PSEN2,NDUFA2,NDUFB9,NDUFAB1,CYB5R3,NDUFS2,OGDH,CASP8,NDUFS4,AIFM1,NDUFAF1,COX6B1,COX7A2,NDUFB4,GLRX2,NDUFV3,MAPK9,NDUFS3,FIS1,COX11,UQCR10,CYC1,CAT,COX5A,SDHD,NDUFA3,CYB5A,ATPAF2,COX15
Protein Ubiquitination Pathway	6.91831e-07	0.336	50/268 (19%)	40/268 (15%)	178/268 (66%)	FZR1,CRYAB,UBE2A,USP5,DNAJB4,UBE2D2,USP20,DNAJC15,HSPA5,SKP1,TCEB1,PSMC5,HSPA4,BAG1,DNAJC8,USP10,UCHL5,UBE2E3,NEDD4L,DNAJC16,PSMB5,UBE2Q1,UBE4B,HSPA9,USP9X,PSME2,PSMD6,DNAJC2,TCEB2,TRAF6,PSMD11,ANAPC4,PSMB7,DNAJC5,PSMB2,UBE2G1,UBR1,PSMD12,ANAPC5,PSMB1,DNAJC14,VHL,UBE2I,USP21,USP14,USP12,PSMD7,PSMD9,CUL1,USP54,DNAJC10,USP39,PSMB6,UBE2F,USP3,HSP90B1,PSMD10,HSP90AB1,DNAJC4,HSPE1,USP47,USP16,PSMD14,M…
Estrogen Receptor Signaling	0.000933254	0.338	22/136 (16%)	24/136 (18%)	90/136 (66%)	RAF1,TAF11,POLR2D,MED23,CCNC,MAPK1,GTF2F2,HRAS,KRAS,TAF10,MNAT1,TAF13,SHC1,KAT2B,MED15,IGFBP1,MAP2K1,GTF2H3,MED18,TAF12,TAF9,SRA1,TAF6,MED20,MED1,HIST2H3C (includes others),TBP,GTF2F1,RBFOX2,PCK1,MED6,POLR2G,H3F3A/H3F3B,HDAC3,RRAS2,GTF2H4,POLR2E,TRRAP,ERCC3,SPEN,MED31,MED24,ESR1,MED4,CARM1,TAF15
IGF-1 Signaling	0.000933254	0.381	21/105 (20%)	19/105 (18%)	65/105 (62%)	PRKACB,RAF1,PIK3CA,JAK1,MAPK1,SOCS6,PDPK1,HRAS,KRAS,IGFBP7,JAK2,PIK3R4,PTK2,YWHAQ,SHC1,IGF1,AKT3,IGFBP1,PIK3R2,MAP2K1,ATM,RPS6KB1,PXN,YWHAG,YWHAE,YWHAB,YWHAZ,SOCS4,STAT3,GRB10,PIK3R3,CSNK2A2,FOS,NEDD4,RRAS2,PTPN11,PRKACA,PRKAG2,SOCS5,PRKAR1A
NRF2-mediated Oxidative Stress Response	0.00245471	0.307	33/192 (17%)	26/192 (14%)	133/192 (69%)	MAP2K4,RAF1,MAPK1,DNAJB4,HRAS,GCLC,KRAS,DNAJC15,PIK3R4,CLPP,SOD2,KEAP1,DNAJC8,ATF4,DNAJA2,UBE2E3,TXN,GCLM,DNAJC16,PRKD3,ATM,MGST1,GSTM3,BACH1,PIK3R3,DNAJC5,DNAJC14,GSTP1,MAP2K5,FTH1,PIK3CA,USP14,GSTM5,PRDX1,ABCC2,NQO2,ACTA2,DNAJC10,SOD3,GSTT1,DNAJC4,PMF1,UBE2K,PIK3R2,MAP2K1,NFE2L2,PRKCA,MAP2K7,ACTB,HERPUD1,MAPK9,SLC35A2,MAFK,DNAJB9,FOS,RRAS2,CAT,CDC34,DNAJC7
EIF2 Signaling	0.0025704	0.26	27/200 (14%)	25/200 (13%)	148/200 (74%)	RAF1,RPL22,RPL27A,MAPK1,PDPK1,HRAS,KRAS,PIK3R4,EIF3C/EIF3CL,RPS3A,RPL7A,EIF3D,ATM,PABPC1,EIF2AK1,RPL36A/RPL36A-HNRNPH2,RPL27,RPLP0,PIK3R3,RPS4X,RPL39,EIF2B5,RPL41,RPLP1,EIF3K,PIK3CA,PPP1CB,EIF2B2,EIF4E,SHC1,EIF2S3,EIF3A,AKT3,PIK3R2,RPS3,MAP2K1,RPS24,RPL4,EIF3H,PPP1R15A,AGO2,RPL21,RPL23,RPL9,RPS12,EIF3F,RRAS2,EIF3I,EIF2B1,RPL38,EIF3L,RPS14
Acute Phase Response Signaling	0.0025704	0.317	36/180 (20%)	21/180 (12%)	123/180 (68%)	MAP2K4,RAF1,MAPK1,SOCS6,HRAS,PDPK1,KRAS,F2,IKBKB,IKBKG,SOD2,ITIH2,APCS,ITIH4,IL1RAP,TTR,C3,C1S,STAT3,MAPK12,PIK3R3,TRAF6,IL18,PTPN11,SOCS5,RBP4,ECSIT,PIK3CA,APOH,C9,JAK2,NFKB1,HNRNPK,HRG,SERPIND1,IRAK1,SHC1,MTOR,MBL2,F8,NGFR,CFB,AKT3,SERPINA1,PIK3R2,MAP2K1,MAP2K7,AHSG,MAPK9,SOCS4,SAA2-SAA4,PLG,FOS,ALB,RIPK1,RRAS2,CRP
VEGF Signaling	0.0025704	0.346	14/104 (13%)	22/104 (21%)	68/104 (65%)	RAF1,PIK3CA,MAPK1,PTK2B,ACTA2,HRAS,KRAS,HIF1A,NOS3,PIK3R4,EIF2B2,ELAVL1,ARNT,BCL2,PTK2,VEGFA,SHC1,Vegfb,EIF2S3,AKT3,VCL,PIK3R2,MAP2K1,ATM,PRKCA,PXN,YWHAE,FLT1,ACTB,ROCK1,PIK3R3,RRAS2,PTPN11,EIF2B1,EIF2B5,ACTN4
Hypoxia Signaling in the Cardiovascular System	0.00263027	0.418	14/67 (21%)	14/67 (21%)	39/67 (58%)	UBE2A,UBE2D2,HIF1A,NOS3,ARNT,UBE2F,PTEN,VEGFA,HSP90B1,HSP90AB1,SUMO1,ATF4,UBE2E3,ATM,TP53,UBE2Q1,UBE2M,COPS5,UBE2R2,CSNK1D,MDM2,ATF2,UBE2J1,UBE2G1,CDC34,UBE2D3,VHL,UBE2I
Glucocorticoid Receptor Signaling	0.00323594	0.265	30/294 (10%)	48/294 (16%)	216/294 (73%)	MAP2K4,PRKACB,RAF1,TAF11,JAK1,POLR2D,MAPK1,NFATC3,SMAD3,SLPI,HRAS,KRAS,GTF2E2,TAF10,MNAT1,HSPA5,PIK3R4,TAF13,HSPA4,IKBKB,IKBKG,BAG1,SUMO1,PPP3R1,ATM,STAT5A,TAF9,SMAD2,MED1,HSPA9,TBP,RAC1,GTF2F1,PCK1,STAT3,MAPK12,PIK3R3,TRAF6,POU2F1,POLR2E,SMARCA2,ERCC3,PRKACA,ESR1,UBE2I,PIK3CA,GTF2F2,CCL5,JAK2,NFKB1,PTGES3,BCL2,SHC1,HSP90B1,NFAT5,KAT2B,PPP3CB,HSP90AB1,CEBPA,AKT3,PIK3R2,MAP2K1,PPP3CA,MMP1,GTF2H3,T…
PI3K/AKT Signaling	0.00354813	0.306	22/144 (15%)	22/144 (15%)	100/144 (69%)	RAF1,PIK3CA,JAK1,MAPK1,ILK,PDPK1,HRAS,KRAS,INPPL1,JAK2,NOS3,NFKB1,EIF4E,PTEN,BCL2,YWHAQ,IKBKB,SHC1,IKBKG,MTOR,HSP90B1,HSP90AB1,TSC2,AKT3,PIK3R2,CTNNB1,MAP2K1,MCL1,TP53,RPS6KB1,RHEB,YWHAG,YWHAE,YWHAB,PPP2R5D,YWHAZ,ITGA5,MDM2,PIK3R3,PPP2R1A,RRAS2,INPP5F,INPP5K,PPP2R5E
Remodeling of Epithelial Adherens Junctions	0.00588844	0.397	11/68 (16%)	16/68 (24%)	41/68 (60%)	NME1,RALA,RAB5C,ACTA2,CTNNA1,TUBB,CLIP1,TUBB2B,ACTR3,VCL,CTNNB1,HGS,RAB5A,ARPC5L,MAPRE1,ACTB,TUBG1,TUBA4A,RAB7A,APC,MET,ARPC1A,TUBA1A,TUBB6,MAPRE2,ACTN4,DNM1L
Sertoli Cell-Sertoli Cell Junction Signaling	0.00691831	0.281	19/196 (10%)	36/196 (18%)	141/196 (72%)	MAP2K4,PRKACB,RAF1,MAP3K11,MAPK1,JAM2,HRAS,KRAS,NOS3,TUBB,PTEN,MPP6,TJAP1,KEAP1,MTMR2,GUCY1B3,TJP2,GUCY1A3,RAC1,ITGA5,MAPK12,ATF2,EPN2,CLDN12,PRKACA,ACTN4,PVRL2,SPTBN1,CLDN15,ACTA2,CTNNA1,ILK,CDC42,BCAR1,TUBB2B,PPAP2B,AKT3,CLDN9,CTNNB1,MAP2K1,EPN1,MAP2K7,TJP1,ACTB,TUBG1,TUBA4A,MAPK9,YBX3,EPB41,TUBA1A,RRAS2,TUBB6,CLDN1,PRKAG2,PRKAR1A
Renal Cell Carcinoma Signaling	0.00691831	0.378	10/74 (14%)	18/74 (24%)	46/74 (62%)	ETS1,RAPGEF1,RAF1,PAK4,PIK3CA,MAPK1,RAC1,HRAS,KRAS,TCEB2,HIF1A,CDC42,PIK3R4,TCEB1,PDGFB,ARNT,PIK3R3,MET,VEGFA,FOS,RRAS2,PTPN11,AKT3,EGLN3,PIK3R2,MAP2K1,VHL,ATM
JAK/Stat Signaling	0.00870964	0.4	13/70 (19%)	15/70 (21%)	42/70 (60%)	RAF1,PIK3CA,JAK1,PIAS2,MAPK1,SOCS6,HRAS,KRAS,JAK2,PIK3R4,SHC1,MTOR,PTPN1,AKT3,PIK3R2,MAP2K1,ATM,STAT5A,STAT6,GNAQ,SOCS4,STAT3,PIK3R3,FOS,PIAS3,RRAS2,PTPN11,SOCS5
Chronic Myeloid Leukemia Signaling	0.0134896	0.324	12/105 (11%)	22/105 (21%)	71/105 (68%)	RAF1,PIK3CA,MAPK1,PA2G4,SMAD3,HRAS,KRAS,NFKB1,PIK3R4,CBLC,HDAC6,IKBKB,RB1,E2F6,IKBKG,HDAC11,HDAC7,E2F5,AKT3,PIK3R2,MAP2K1,ATM,TP53,STAT5A,E2F4,HDAC2,TFDP1,MECOM,MDM2,HDAC5,PIK3R3,RRAS2,HDAC3,PTPN11
IL-3 Signaling	0.0141254	0.378	11/74 (15%)	17/74 (23%)	46/74 (62%)	RAF1,RAPGEF1,PIK3CA,JAK1,MAPK1,HRAS,KRAS,JAK2,PIK3R4,SHC1,PPP3CB,PPP3R1,AKT3,PIK3R2,MAP2K1,PRKD3,PPP3CA,ATM,PRKCA,STAT5A,STAT6,CHP1,RAC1,STAT3,PIK3R3,FOS,CSF2RB,RRAS2
Myc Mediated Apoptosis Signaling	0.0158489	0.4	13/60 (22%)	11/60 (18%)	36/60 (60%)	TP53,MAP2K4,PIK3CA,YWHAG,YWHAE,CASP3,YWHAB,YWHAZ,HRAS,MAPK9,KRAS,MAPK12,PIK3R4,BCL2,YWHAQ,PIK3R3,FADD,SHC1,RRAS2,IGF1,AKT3,PIK3R2,CASP8,ATM
Germ Cell-Sertoli Cell Junction Signaling	0.0177828	0.297	18/165 (11%)	31/165 (19%)	116/165 (70%)	MAP2K4,PIK3CA,MAP3K11,MAPK1,RHOT2,ACTA2,ILK,CTNNA1,HRAS,PDPK1,KRAS,CDC42,PIK3R4,TUBB,BCAR1,TUBB2B,PTK2,RHOB,PPAP2B,KEAP1,RHOU,MTMR2,PIK3R2,CTNNB1,MAP2K1,ATM,MAP2K7,PAK4,PXN,EPN1,TJP1,ACTB,TUBG1,TUBA4A,RAC1,MAPK9,RHOJ,LAMC3,MAPK12,PIK3R3,EPN2,CDH2,TUBA1A,RRAS2,TUBB6,RND3,FER,ACTN4,PVRL2
Integrin Signaling	0.0239883	0.279	24/208 (12%)	34/208 (16%)	150/208 (72%)	MAP2K4,RAPGEF1,RAF1,MAP3K11,MPRIP,MAPK1,HRAS,KRAS,NCK1,PIK3R4,PTEN,ITGAE,PTK2,RHOB,CAV1,ITGB5,ATM,RAC1,ITGA5,RHOJ,BCAR3,PIK3R3,MYL12A,ARPC1A,RND3,MYL12B,ARF3,CAPN1,CAPN2,ITGA1,ACTN4,RAP1B,PIK3CA,RALA,ACTA2,RHOT2,ILK,PPP1CB,MYLK,CDC42,BCAR1,SHC1,ACTR3,RHOU,AKT3,ILKAP,VCL,PIK3R2,MAP2K1,PARVA,PXN,PAK4,ARPC5L,ACTB,ROCK1,WIPF1,CAPNS1,RRAS2
Pancreatic Adenocarcinoma Signaling	0.0263027	0.308	16/120 (13%)	21/120 (18%)	83/120 (69%)	MAP2K4,RAF1,PIK3CA,NAPEPLD,JAK1,RALA,MAPK1,PA2G4,SMAD3,KRAS,JAK2,PIK3R4,NFKB1,CDC42,BCL2,VEGFA,E2F6,RB1,CYP2E1,Vegfb,E2F5,AKT3,PIK3R2,MAP2K1,ATM,TP53,SMAD2,E2F4,TFDP1,RAC1,MAPK9,MDM2,STAT3,MAPK12,PIK3R3,NOTCH1,CDK2
Regulation of eIF4 & p70S6K Signaling	0.0269153	0.246	23/175 (13%)	20/175 (11%)	132/175 (75%)	RAF1,PIK3CA,MAPK1,PDPK1,HRAS,KRAS,PAIP2,PIK3R4,EIF2B2,EIF3C/EIF3CL,EIF4E,SHC1,MTOR,RPS3A,EIF3D,EIF3A,EIF2S3,AKT3,PIK3R2,RPS3,MAP2K1,RPS24,ATM,PABPC1,RPS6KB1,EIF3H,PPP2R5D,ITGA5,AGO2,MAPK12,RPS12,PIK3R3,RPS4X,EIF3F,PPP2R1A,RRAS2,EIF2B1,EIF2B5,EIF3I,PPP2R5E,EIF3L,RPS14,EIF3K
Insulin Receptor Signaling	0.0275423	0.296	18/142 (13%)	24/142 (17%)	100/142 (70%)	PRKACB,RAF1,RAPGEF1,PIK3CA,JAK1,MAPK1,PDPK1,HRAS,PPP1CB,INPPL1,KRAS,JAK2,STXBP4,NCK1,PIK3R4,EIF2B2,EIF4E,PTEN,SHC1,MTOR,PPP1R10,PTPN1,TSC2,AKT3,PIK3R2,STX4,MAP2K1,ATM,RPS6KB1,PPP1R14A,ACLY,GRB10,PIK3R3,RRAS2,PTPN11,INPP5F,EIF2B1,EIF2B5,PRKACA,PRKAG2,INPP5K,PRKAR1A
Non-Small Cell Lung Cancer Signaling	0.0275423	0.316	10/79 (13%)	15/79 (19%)	54/79 (68%)	TP53,RAF1,FHIT,PIK3CA,TFDP1,MAPK1,PA2G4,PDPK1,HRAS,KRAS,PIK3R4,PIK3R3,RXRG,STK4,RB1,RRAS2,RARB,AKT3,RASSF5,PIK3R2,RXRB,MAP2K1,RASSF1,PRKCA,ATM
Rac Signaling	0.0275423	0.295	14/122 (11%)	22/122 (18%)	86/122 (70%)	MAP2K4,RAF1,PIK3CA,MAP3K11,MAPK1,PTK2B,PIP4K2B,HRAS,KRAS,CDC42,NFKB1,PIK3R4,CDK5R1,PTK2,ACTR3,ARFIP2,CFL2,PIK3R2,MAP2K1,PI4KA,ATM,NCKAP1,RPS6KB1,MAP2K7,PAK4,ARPC5L,RAC1,ITGA5,PIK3R3,PIP5K1A,RRAS2,ARPC1A,CYFIP1,CD44,SH3RF1,PARD3
Small Cell Lung Cancer Signaling	0.0275423	0.303	11/89 (12%)	16/89 (18%)	62/89 (70%)	TRAF3,PIK3CA,PA2G4,PIK3R4,NFKB1,PTEN,BCL2,PTK2,RB1,IKBKB,IKBKG,TRAF4,RARB,AKT3,PIK3R2,TRAF5,RXRB,ATM,TP53,FHIT,TFDP1,TRAF6,PIK3R3,RXRG,PIAS3,CDK2,BIRC2
PTEN Signaling	0.0275423	0.301	16/133 (12%)	24/133 (18%)	93/133 (70%)	MAST2,RAF1,PIK3CA,MAPK1,ILK,PDPK1,HRAS,KRAS,INPPL1,CDC42,NFKB1,BCAR1,PTEN,BCL2,PTK2,FGFR3,IKBKB,SHC1,IKBKG,BMPR1A,NGFR,PDGFRA,AKT3,PIK3R2,MCRS1,MAP2K1,RPS6KB1,SHARPIN,CASP3,FLT1,RAC1,ITGA5,FGFR2,PIK3R3,CSNK2A2,GHR,MAGI1,RRAS2,INPP5F,INPP5K
Telomerase Signaling	0.0275423	0.317	18/104 (17%)	15/104 (14%)	71/104 (68%)	RAF1,PIK3CA,MAPK1,TERF2IP,PDPK1,HRAS,KRAS,PIK3R4,PTGES3,HDAC6,RB1,SHC1,HSP90B1,HSP90AB1,HDAC11,HDAC7,AKT3,PIK3R2,MAP2K1,ATM,TP53,ETS1,HDAC2,PPP2R5D,HDAC5,TERF2,PIK3R3,PPP2R1A,RRAS2,HDAC3,TPP1,PPP2R5E,ELK3
Prostate Cancer Signaling	0.0275423	0.303	17/99 (17%)	13/99 (13%)	69/99 (70%)	RAF1,PIK3CA,MAPK1,KLK3,PA2G4,HRAS,PDPK1,KRAS,PIK3R4,NFKB1,BCL2,PTEN,RB1,HSP90B1,MTOR,HSP90AB1,AKT3,ATF4,PIK3R2,CTNNB1,MAP2K1,ATM,TP53,TFDP1,MDM2,ATF2,PIK3R3,RRAS2,CDK2,GSTP1
Tryptophan Degradation III (Eukaryotic)	0.0281838	0.208	8/48 (17%)	2/48 (4%)	38/48 (79%)	HSD17B10,HADHB,L3HYPDH,KMO,TDO2,Acat2/Acat3,HAAO,EHHADH,HADH,KYNU
Neurotrophin/TRK Signaling	0.0288403	0.329	9/76 (12%)	16/76 (21%)	51/76 (67%)	MAP2K4,RAF1,MAP2K7,PIK3CA,KLK3,MAPK1,PDPK1,HRAS,KRAS,NGF,CDC42,PIK3R4,ATF2,PIK3R3,FOS,SHC1,RRAS2,PTPN11,NGFR,ATF4,PIK3R2,FRS2,MAP2K1,MAP2K5,ATM
PAK Signaling	0.0288403	0.292	12/106 (11%)	19/106 (18%)	75/106 (71%)	MAP2K4,RAF1,PIK3CA,MAPK1,MYL6,PTK2B,HRAS,MYLK,KRAS,NCK1,CDC42,PIK3R4,PTK2,SHC1,CFL2,PDGFRA,PIK3R2,MAP2K1,ATM,PAK4,PXN,CASP3,RAC1,MAPK9,ITGA5,MAPK12,PDGFB,PIK3R3,MYL12A,RRAS2,MYL12B
RAR Activation	0.0354813	0.274	19/190 (10%)	33/190 (17%)	138/190 (73%)	MAP2K4,PRKACB,MAPK1,ADCY4,SMAD3,PDPK1,MNAT1,PSMC5,PTEN,VEGFA,ALDH1A1,RPL7A,RDH16,SMAD1,PRKD3,STAT5A,SMAD2,MED1,RAC1,MAPK12,PIK3R3,CSF2RB,SMARCA2,Aldh1a7,ERCC3,PRKACA,RBP4,PIK3CA,ADH1C,JAK2,SMAD5,NFKB1,KAT2B,RARB,AKT3,NR2F6,PIK3R2,RXRB,MAP2K1,MMP1,PRKCA,GTF2H3,SRA1,MAPK9,PARP1,CSNK2A2,FOS,RXRG,GTF2H4,PRKAG2,CARM1,PRKAR1A
NGF Signaling	0.0363078	0.294	12/119 (10%)	23/119 (19%)	84/119 (71%)	MAP2K4,RAP1B,RAF1,PIK3CA,MAP3K11,MAPK1,PDPK1,HRAS,KRAS,SMPD1,NFKB1,PIK3R4,NGF,CDC42,IKBKB,SHC1,IKBKG,NGFR,TRAF4,AKT3,ATF4,PIK3R2,MAP2K1,ATM,TP53,RPS6KB1,RAC1,MAPK9,MAPK12,ATF2,TRAF6,ROCK1,PIK3R3,RRAS2,PTPN11
Clathrin-mediated Endocytosis Signaling	0.0371535	0.276	22/196 (11%)	32/196 (16%)	142/196 (72%)	EPS15,RAB5C,F2R,SH3GLB1,PIK3R4,AP2A2,F2,VEGFA,PON1,PPP3R1,Vegfb,STAM,ITGB5,ATM,USP9X,RAC1,ITGA5,PCYOX1,PDGFB,PIK3R3,MET,ARPC1A,RAB11A,RBP4,APOE,PIK3CA,AP2A1,RAB4A,PICALM,APOF,ACTA2,NUMB,CDC42,ACTR3,ARRB1,PPP3CB,IGF1,SERPINA1,SH3GLB2,PIK3R2,HGS,PPP3CA,AP2B1,EPN1,RAB5A,ARPC5L,ACTB,CHP1,RAB7A,MDM2,CSNK2A2,ALB,LDLR,DNM1L
Huntington's Disease Signaling	0.0380189	0.251	23/243 (9%)	38/243 (16%)	182/243 (75%)	MAP2K4,POLR2D,MAPK1,NAPG,HRAS,PDPK1,PIK3R4,HSPA5,AP2A2,CDK5R1,HDAC6,HSPA4,HDAC11,HDAC7,ATF4,NAPA,PRKD3,ATM,ATP5J,TP53,HDAC2,CASP3,HSPA9,TBP,GPAA1,ATF2,HDAC5,PIK3R3,DYNC1I2,HDAC3,DNAJC5,ATP5B,POLR2E,CAPN1,PLCB3,CAPN2,PIK3CA,SDHB,CASP4,NGF,VTI1B,SHC1,MTOR,ARFIP2,CDK5,IGF1,AKT3,PIK3R2,GOSR1,CASP8,PRKCA,MAP2K7,YKT6,GNAQ,MAPK9,ZDHHC17,POLR2G,CAPNS1,DNM1L,GOSR2,CASP7
TCA Cycle II (Eukaryotic)	0.0467735	0.268	7/41 (17%)	4/41 (10%)	30/41 (73%)	SDHB,IDH3G,SUCLG1,ACO2,DLD,SDHD,SDHC,MDH1,MDH2,OGDH,ACO1

## Sheet: 3. IPA Rapa Female|Control F
Ingenuity Canonical Pathways	B-H p-value	Ratio Changed	Downregulated	Upregulated	No overlap with dataset	Molecules
Mitochondrial Dysfunction	6.30957e-13	0.396	27/192 (14%)	49/192 (26%)	116/192 (60%)	NDUFA9,APH1B,UQCR11,XDH,NDUFB5,NDUFA7,ATP5G2,DHODH,NDUFA1,NDUFB10,NDUFA5,SOD2,CASP9,NDUFS6,NDUFA10,ATP5F1,NDUFA8,ATP5J,NDUFB3,ATP5A1,SURF1,BACE1,SDHC,COX7A1,PRDX3,ATP5B,TXN2,NDUFA6,NDUFB7,UQCRC2,NDUFA12,NDUFB2,COX5B,COX6C,NDUFA4,HSD17B10,COX7B,SDHB,UQCRH,COX6A1,PRDX5,COX10,RHOT2,TRAK1,PSEN2,NDUFA2,NDUFB9,PARK7,CYB5R3,NDUFB6,NDUFS2,CASP8,OGDH,NDUFS4,NDUFV1,NDUFAF1,NDUFB4,COX7A2,COX6B1,COX17,GLRX2,…
Estrogen Receptor Signaling	0.000933254	0.382	21/136 (15%)	31/136 (23%)	84/136 (62%)	RAF1,TAF11,POLR2F,POLR2D,MAPK1,HRAS,KRAS,TAF10,MNAT1,DDX5,MAP2K2,MAPK3,MED21,TAF9,MED1,HIST2H3C (includes others),RBFOX2,GTF2F1,PCK1,MED12,NCOA3,TAF9B,H3F3A/H3F3B,HDAC3,POLR2E,ERCC3,SPEN,ESR1,MED23,CCNC,GTF2H2,G6PC3,SMARCA4,KAT2B,MED15,MED10,GTF2H3,TAF12,MED18,SRA1,NRAS,MED20,GRB2,MED30,MED6,MED27,POLR2G,RRAS2,GTF2H4,G6PC,MED4,CARM1
EIF2 Signaling	0.00194984	0.3	36/200 (18%)	24/200 (12%)	140/200 (70%)	RAF1,RPL22,RPL27A,MAPK1,HRAS,PDPK1,EIF4A2,KRAS,EIF3C/EIF3CL,EIF2A,RPS3A,RPL7A,MAP2K2,EIF3B,EIF3D,MAPK3,PIK3CG,EIF5,PAIP1,RPL12,PPP1CA,ATM,PABPC1,EIF2AK1,RPL36A/RPL36A-HNRNPH2,RPL3,RPL7L1,RPLP0,RPL39,EIF4A3,EIF2B5,RPS25,EIF3K,PIK3CA,PPP1CB,RPS21,EIF4G1,EIF2B2,EIF3A,RPS3,RPL31,RPL29,RPS24,RPL4,NRAS,PIK3C2A,GRB2,RPS2,RPL30,RPS19,RPL21,RPL23,EIF3G,RPS16,RRAS2,EIF2B1,EIF3I,PIK3CB,RPL38,EIF3L
Systemic Lupus Erythematosus Signaling	0.00338844	0.248	36/250 (14%)	26/250 (10%)	188/250 (75%)	KNG1,PRPF19,MAPK1,NFATC3,ZMAT5,TXNL4A,HRAS,KRAS,SART1,SNRPA,MAPK3,PIK3CG,SNRPD1,PRPF40A,NHP2L1,PRPF40B,ATM,PRPF38A,LSM6,IFNA1/IFNA13,IL33,IL18,IL1RN,SNRNP25,SF3B4,ZCRB1,HLA-E,CD2BP2,PIK3CA,Rnu6,HLA-A,PRPF3,PRPF8,SNRPG,HNRNPA2B1,C9,C8A,FCGR2B,LSM2,NFATC1,LSM14A,MTOR,NFAT5,EFTUD2,TLR7,CD22,SNRPD3,SNRPD2,LSM14B,NRAS,SNRPB,PIK3C2A,GRB2,HLA-B,PRPF38B,FOS,RRAS2,LSM12,SNRNP200,PRPF6,SNRNP70,PIK3CB
Protein Ubiquitination Pathway	0.00338844	0.328	43/268 (16%)	45/268 (17%)	180/268 (67%)	FZR1,UBE2A,USP5,PSMA7,FBXW7,PSMB8,DNAJB2,HSPA5,TCEB1,PSMC5,USP7,USP8,PAN2,USP53,UBE2D4,USP10,UCHL5,PSMC2,DNAJC16,DNAJB12,UBE2Q1,UBE4B,USP38,HSPA9,DNAJC19,USP9X,PSME2,PSMD5,USP19,HSPA8,TRAF6,UBE2G2,PSMD11,ANAPC4,PSMB7,UBE2L3,DNAJC5,PSMB2,UBE2G1,ANAPC5,PSMA4,PSMB1,PSMD4,DNAJB6,UBE2I,USP21,USP12,PSMD7,HLA-A,PSMB10,PSMD9,DNAJC12,CUL1,USP39,UBE2F,USO1,USP3,HSP90B1,PSMD10,HSP90AB1,DNAJC4,HSPE1,PSMD14,H…
NRF2-mediated Oxidative Stress Response	0.0109648	0.333	30/192 (16%)	34/192 (18%)	128/192 (67%)	RAF1,MAPK1,HRAS,KRAS,DNAJB2,CLPP,SOD2,MAP2K2,MAPK3,PIK3CG,KEAP1,ATF4,DNAJA3,DNAJA2,TXN,GCLM,PRKD3,DNAJC16,ATM,GSTK1,MGST1,DNAJB12,GSTM3,DNAJC19,BACH1,DNAJC5,DNAJB6,MGST3,GSTP1,MAP2K5,FTH1,EPHX1,AKR7A2,PIK3CA,PRDX1,ABCC2,NQO2,ACTA2,MAFG,CUL3,GSTT1,GSTT2/GSTT2B,AKR1A1,DNAJC4,VCP,PMF1,UBE2K,FMO1,NFE2L2,GSTM1,MAP2K7,NRAS,SOD1,PIK3C2A,ACTB,MAP3K1,NQO1,HERPUD1,SLC35A2,DNAJB9,FOS,RRAS2,CAT,PIK3CB
mTOR Signaling	0.0109648	0.308	37/211 (18%)	28/211 (13%)	146/211 (69%)	MAPK1,PRKAB1,PPP2R5B,HRAS,PDPK1,EIF4A2,KRAS,RICTOR,EIF3C/EIF3CL,VEGFA,RPS3A,EIF3B,RHOB,EIF3D,MAPK3,PIK3CG,TSC2,Vegfb,FIGF,PRKD3,AKT1S1,ATM,EIF4B,RHEB,STK11,RAC1,VEGFC,RHOJ,MLST8,PLD1,ATG13,PPP2R1A,RND3,EIF4A3,RPS25,EIF3K,PIK3CA,RHOT2,HIF1A,RPS21,EIF4G1,PRKAG1,MTOR,RHOT1,PRKAA2,EIF3A,PPP2R2C,RPS3,RPS24,NRAS,PIK3C2A,RHOC,RPS2,PPP2R5D,RPS19,EIF3G,DGKZ,RPS16,RRAS2,EIF3I,PRKAG2,PIK3CB,RPS6KA4,PPP2R5E,…
Integrin Signaling	0.0199526	0.327	40/208 (19%)	28/208 (13%)	140/208 (67%)	RAPGEF1,RAF1,MPRIP,MAPK1,ARPC5,HRAS,KRAS,NCK1,PTEN,PTK2,RHOB,MAP2K2,PIK3CG,MAPK3,ITGAV,ITGB5,ATM,ITGAD,CAPN6,CRKL,RAC1,TSPAN2,ITGA5,RHOJ,MYL12A,ARPC1A,RND3,MYL12B,ARF3,CAPN1,CAPN2,ACTN4,CAPN7,RAP1B,RAP2A,FYN,PIK3CA,RALA,ARPC1B,ACTA2,RHOT2,ILK,PPP1CB,CRK,MYLK,ARF6,ACTR3,WASL,RHOT1,ILKAP,VCL,ACTN1,PARVA,PXN,PAK4,NRAS,PIK3C2A,GRB2,ARPC5L,RHOC,ACTB,ROCK1,WIPF1,RRAS2,CAPNS1,PIK3CB,NEDD9,ARPC4
Actin Nucleation by ARP-WASP Complex	0.0199526	0.379	16/66 (24%)	9/66 (14%)	41/66 (62%)	NRAS,ARPC1B,RHOC,ARPC5L,GRB2,GNA12,ARPC5,RHOT2,RAC1,ITGA5,HRAS,RHOJ,KRAS,NCK1,ROCK1,ROCK2,WIPF1,ARPC1A,RRAS2,WASL,ACTR3,RND3,RHOB,RHOT1,ARPC4
Telomerase Signaling	0.0213796	0.375	24/104 (23%)	15/104 (14%)	65/104 (63%)	RAF1,PIK3CA,MAPK1,TERT,TERF2IP,PPP2R5B,PDPK1,HRAS,KRAS,PTGES3,RB1,HSP90B1,HSP90AB1,MAP2K2,ETS2,PIK3CG,HDAC11,MAPK3,PPP2R2C,EGFR,ATM,TP53,HDAC4,NRAS,HDAC2,PIK3C2A,GRB2,PPP2R5D,HDAC5,ELF1,TERF2,PPP2R1A,ELF2,RRAS2,HDAC3,TPP1,PIK3CB,PPP2R5E,ELK3
Chronic Myeloid Leukemia Signaling	0.0229087	0.362	20/105 (19%)	18/105 (17%)	67/105 (64%)	RAF1,PIK3CA,TGFBR1,MAPK1,PA2G4,SMAD3,HRAS,KRAS,CRK,RBL1,TGFBR2,RB1,E2F6,IKBKG,MAP2K2,MAPK3,PIK3CG,HDAC11,E2F5,CHUK,E2F2,ATM,TP53,STAT5A,NRAS,HDAC4,HDAC2,MECOM,PIK3C2A,GRB2,CRKL,IKBKE,SIN3A,HDAC5,RRAS2,HDAC3,PTPN11,PIK3CB
Regulation of eIF4 & p70S6K Signaling	0.0229087	0.286	27/175 (15%)	23/175 (13%)	125/175 (71%)	EIF1AY,RAF1,PIK3CA,EIF4EBP2,MAPK1,PPP2R5B,HRAS,PDPK1,EIF4A2,KRAS,RPS21,PAIP2,EIF4G1,EIF2B2,EIF3C/EIF3CL,EIF2A,MTOR,RPS3A,MAP2K2,EIF3B,EIF3D,PIK3CG,MAPK3,PAIP1,EIF3A,PPP2R2C,RPS3,RPS24,ATM,PABPC1,NRAS,PIK3C2A,GRB2,RPS2,PPP2R5D,RPS19,ITGA5,EIF3G,PPP2R1A,RPS16,RRAS2,EIF4A3,EIF2B1,EIF3I,EIF2B5,PIK3CB,RPS25,PPP2R5E,EIF3L,EIF3K
Superpathway of Methionine Degradation	0.0338844	0.25	8/64 (13%)	8/64 (13%)	48/64 (75%)	BHMT,MAT1A,MGMT,FTSJ1,PCCB,CDO1,MAT2B,CBS,PCCA,PRMT5,CTH,MAT2A,GOT2,BHMT2,SUOX,AHCY
IGF-1 Signaling	0.0338844	0.371	25/105 (24%)	14/105 (13%)	66/105 (63%)	RAF1,PIK3CA,MAPK1,SOCS2,SRF,PDPK1,HRAS,KRAS,JAK2,IGFBP7,PRKAG1,PTK2,YWHAQ,CASP9,IGF1,MAP2K2,MAPK3,PIK3CG,RASA1,ATM,PXN,YWHAG,NRAS,PIK3C2A,GRB2,YWHAB,YWHAZ,STAT3,GRB10,FOS,RRAS2,PTPN11,FOXO1,PRKACA,PRKAG2,PIK3CB,CYR61,SOCS5,PRKAR1A
Glucocorticoid Receptor Signaling	0.0446684	0.282	45/294 (15%)	38/294 (13%)	211/294 (72%)	RAF1,POLR2F,TAF11,TGFBR1,POLR2D,MAPK1,PRKAB1,SGK1,NFATC3,SMAD3,SLPI,HRAS,KRAS,TAF10,MNAT1,CD163,HSPA5,TSC22D3,IL1R2,TGFBR2,IKBKG,MAP2K2,PIK3CG,MAPK3,ATM,STAT5A,TAF9,MED1,HSPA9,RAC1,GTF2F1,TAT,PCK1,STAT3,NCOA3,TAF9B,HSPA8,TRAF6,POU2F1,POLR2E,IL1RN,SMARCA2,ERCC3,PRKACA,ESR1,UBE2I,PIK3CA,GTF2H2,JAK2,CCL5,PRKAG1,PTGES3,NFATC1,SMARCA4,HSP90B1,NFAT5,KAT2B,HSP90AB1,PRKAA2,CEBPA,CHUK,PPP3CA,MMP1,GTF2H3,T…
VEGF Signaling	0.0446684	0.346	19/104 (18%)	17/104 (16%)	68/104 (65%)	EIF1AY,RAF1,PIK3CA,MAPK1,ACTA2,HRAS,KRAS,HIF1A,EIF2B2,ELAVL1,VEGFA,PTK2,ROCK2,MAP2K2,MAPK3,PIK3CG,Vegfb,FIGF,VCL,ACTN1,ATM,PXN,NRAS,PIK3C2A,GRB2,FLT1,ACTB,VEGFC,ROCK1,RRAS2,FOXO1,PTPN11,EIF2B1,EIF2B5,PIK3CB,ACTN4
Tryptophan Degradation III (Eukaryotic)	0.0446684	0.229	5/48 (10%)	6/48 (13%)	37/48 (77%)	AFMID,HSD17B10,HADHB,KMO,TDO2,Acat2/Acat3,HAAO,ACAT1,IDO2,HSD17B4,KYNU
Glutathione-mediated Detoxification	0.0489779	0.295	3/44 (7%)	10/44 (23%)	31/44 (70%)	Gstt3,GSTZ1,GSTT1,GSTT2/GSTT2B,GSTM1,Gsta4,MGST1,GSTM3,HPGDS,ANPEP,MGST3,GSTP1,GSTK1
Oncostatin M Signaling	0.0489779	0.486	8/35 (23%)	9/35 (26%)	18/35 (51%)	STAT5A,RAF1,TIMP3,EPAS1,NRAS,MAPK1,GRB2,TYK2,HRAS,KRAS,STAT3,JAK2,RRAS2,MAP2K2,MAPK3,OSMR,MMP1

## Sheet: 4. Genes-6-months Rapa
order	SYMBOL	Group (adj_p<0.05, Rapa Male Short vs. Rapa Female Short)	Rapa Male/ Control Male log2Ratio	Rapa Female/ Control Female log2Ratio	Rapa Male/ Control Male p-value	Rapa Female/ Control Female p-value	Rapa Male/ Control Male adjusted p-value	Rapa Female/ Control Female adjusted p-value	Illumina ID	definition
1	PPM1A	RMS0 RFS+	0.00444776	0.342103	0.951796	0.00060446	0.986145	0.0143693	ILMN_2732309	Mus musculus protein phosphatase 1A, magnesium dependent, alpha isoform (Ppm1a), mRNA.
2	PPM1A	RMS0 RFS+	-0.0141865	0.354244	0.819646	0.0014059	0.941309	0.0239916	ILMN_2732308	Mus musculus protein phosphatase 1A, magnesium dependent, alpha isoform (Ppm1a), mRNA.
3	THNSL1	RMS0 RFS+	0.0356774	0.189714	0.476832	0.00172751	0.783594	0.0267295	ILMN_3064134	Mus musculus threonine synthase-like 1 (bacterial) (Thnsl1), transcript variant 1, mRNA.
4	LETMD1	RMS0 RFS+	-0.0582976	0.258282	0.307055	0.00022131	0.671154	0.00756094	ILMN_2616215	Mus musculus LETM1 domain containing 1 (Letmd1), mRNA.
5	2700007P21RIK	RMS0 RFS+	0.00970345	0.204913	0.797052	0.00314313	0.932977	0.0384605	ILMN_3140158	Mus musculus RIKEN cDNA 2700007P21 gene (2700007P21Rik), transcript variant 2, mRNA.
6	G430022H21RIK	RMS0 RFS+	-0.0211055	0.172754	0.554082	0.00221358	0.824215	0.0309937	ILMN_2818206	Mus musculus RIKEN cDNA G430022H21 gene (G430022H21Rik), mRNA.
7	FBXO18	RMS0 RFS+	-0.0395989	0.210668	0.238334	0.00093838	0.61102	0.01906	ILMN_2710538	Mus musculus F-box protein 18 (Fbxo18), mRNA.
8	WSB2	RMS0 RFS+	-0.0217482	0.277198	0.672232	0.00030705	0.882519	0.00933795	ILMN_2512206
9	RBAK	RMS0 RFS+	0.00641767	0.202342	0.872688	0.00032471	0.961142	0.00968659	ILMN_3130983
10	ORF18	RMS0 RFS+	-0.0628212	0.308127	0.321808	0.00134063	0.68217	0.0232238	ILMN_1236917	Mus musculus transmembrane protein 59 (Tmem59), mRNA.
11	HPS5	RMS0 RFS+	0.0316572	0.181606	0.349905	0.00449404	0.702988	0.0476009	ILMN_3113686	Mus musculus Hermansky-Pudlak syndrome 5 homolog (human) (Hps5), transcript variant 2, mRNA.
12	MPG	RMS0 RFS+	0.0177792	0.176718	0.614483	0.00316871	0.855137	0.0386904	ILMN_2600747	Mus musculus N-methylpurine-DNA glycosylase (Mpg), mRNA.
13	VPS33A	RMS0 RFS+	0.0580884	0.253439	0.168726	0.0001825	0.538826	0.00668993	ILMN_2865558	Mus musculus vacuolar protein sorting 33A (yeast) (Vps33a), mRNA.
14	ALG9	RMS0 RFS+	0.018003	0.183043	0.555504	0.00371624	0.825069	0.0423205	ILMN_2687908	Mus musculus asparagine-linked glycosylation 9 homolog (yeast, alpha 1,2 mannosyltransferase) (Alg9), mRNA.
15	ATP6V1D	RMS0 RFS+	-0.0896234	0.333873	0.108302	4.642e-05	0.455669	0.00296979	ILMN_2647048
16	TRIM41	RMS0 RFS+	-0.0126171	0.224168	0.759216	0.00224273	0.918804	0.0312482	ILMN_2427178
17	MAP2K7	RMS0 RFS+	-0.0406562	0.191682	0.430445	0.00054792	0.756317	0.0136637	ILMN_3028981	Mus musculus mitogen activated protein kinase kinase 7 (Map2k7), transcript variant 1, mRNA.
18	4933411K20RIK	RMS0 RFS+	-0.00853843	0.169793	0.895129	0.0029442	0.967735	0.0371438	ILMN_2605417	Mus musculus RIKEN cDNA 4933411K20 gene (4933411K20Rik), mRNA.
19	D11ERTD707E	RMS0 RFS+	0.0288637	0.199279	0.511373	0.00380962	0.801851	0.0429827	ILMN_1247240	Mus musculus coiled-coil domain containing 43 (Ccdc43), mRNA.
20	CDK5	RMS0 RFS+	-0.0457002	0.236427	0.260168	0.00332357	0.631894	0.039835	ILMN_1216721	Mus musculus cyclin-dependent kinase 5 (Cdk5), mRNA.
21	PJA1	RMS0 RFS+	-0.0672128	0.250699	0.344091	0.00304708	0.699377	0.0378457	ILMN_2842877	Mus musculus praja1, RING-H2 motif containing (Pja1), mRNA.
22	ZFP661	RMS0 RFS+	-0.0278667	0.222365	0.605833	0.00078548	0.849101	0.0168246	ILMN_2854593	Mus musculus zinc finger protein 661 (Zfp661), mRNA.
23	IFT172	RMS0 RFS+	-0.0686917	0.206184	0.127002	0.0013241	0.485118	0.0230799	ILMN_2829646	Mus musculus intraflagellar transport 172 homolog (Chlamydomonas) (Ift172), mRNA.
24	A530046H20RIK	RMS0 RFS+	-0.0466579	0.209661	0.319366	0.00377433	0.680928	0.0427541	ILMN_1237234	Mus musculus threonyl-tRNA synthetase-like 2 (Tarsl2), mRNA.
25	IQGAP2	RMS0 RFS+	-0.10339	0.337851	0.158302	3.996e-05	0.527854	0.00275267	ILMN_2908846	Mus musculus IQ motif containing GTPase activating protein 2 (Iqgap2), mRNA.
26	MET	RMS0 RFS+	-0.0835714	0.165617	0.0848475	0.0039791	0.41446	0.0441175	ILMN_2828877	Mus musculus met proto-oncogene (Met), mRNA.
27	AI553587	RMS0 RFS+	-0.0471147	0.20319	0.33353	0.000257	0.691624	0.00828304	ILMN_2615448
28	CBARA1	RMS0 RFS+	-0.0418567	0.263199	0.358449	2.253e-05	0.709876	0.00185947	ILMN_2686513
29	GTRGEO22	RMS0 RFS+	-0.0709115	0.265395	0.126077	2.494e-05	0.483382	0.0020001	ILMN_2592095
30	D030070L09RIK	RMS0 RFS+	0.0483192	0.242242	0.329601	0.00015334	0.688043	0.006175	ILMN_2946873	Mus musculus RIKEN cDNA D030070L09 gene (D030070L09Rik), mRNA.
31	DHX35	RMS0 RFS+	0.0630946	0.218813	0.0958143	0.00097933	0.435485	0.0194749	ILMN_2861225	Mus musculus DEAH (Asp-Glu-Ala-His) box polypeptide 35 (Dhx35), mRNA.
32	P4HB	RMS0 RFS+	0.0431728	0.241265	0.542713	0.00047704	0.818001	0.0123731	ILMN_2735996
33	BC060631	RMS0 RFS+	-0.0107284	0.282532	0.813199	0.00164371	0.938477	0.0261432	ILMN_3146362	Mus musculus cDNA sequence BC060631 (BC060631), mRNA.
34	BTRC	RMS0 RFS+	0.0136699	0.298643	0.821729	0.00058798	0.942408	0.0141462	ILMN_3100042	Mus musculus beta-transducin repeat containing protein (Btrc), transcript variant 1, mRNA.
35	CNOT7	RMS0 RFS+	0.0358948	0.281004	0.360883	0.00462696	0.711684	0.0483411	ILMN_2745540	Mus musculus CCR4-NOT transcription complex, subunit 7 (Cnot7), mRNA.
36	TBCD	RMS0 RFS+	0.0554078	0.315471	0.319601	0.0008174	0.680928	0.0173451	ILMN_2891506	Mus musculus tubulin-specific chaperone d (Tbcd), mRNA.
37	ISG20L2	RMS0 RFS+	-0.0211442	0.264376	0.62942	0.00039758	0.862833	0.0109894	ILMN_2996667	Mus musculus interferon stimulated exonuclease gene 20-like 2 (Isg20l2), mRNA.
38	9430034D17RIK	RMS0 RFS+	-0.0113077	0.287449	0.735825	2.62e-05	0.909475	0.00206212	ILMN_2604358
39	TRIM41	RMS0 RFS+	0.0319452	0.278166	0.574148	0.00246218	0.834405	0.0331422	ILMN_1260252
40	TBP	RMS0 RFS+	0.0276245	0.220177	0.361462	0.00078041	0.711973	0.0167895	ILMN_2869461	Mus musculus TATA box binding protein (Tbp), mRNA.
41	THOC1	RMS0 RFS+	0.0130765	0.285918	0.781976	0.00104244	0.927619	0.0201665	ILMN_2850527	Mus musculus THO complex 1 (Thoc1), mRNA.
42	ADCY4	RMS0 RFS+	-0.135298	0.166777	0.0158002	0.00347368	0.210874	0.0406459	ILMN_2847004	Mus musculus adenylate cyclase 4 (Adcy4), mRNA.
43	PPP1R8	RMS0 RFS+	-0.0762768	0.188973	0.0752794	0.00096254	0.394558	0.0192982	ILMN_2760840	Mus musculus protein phosphatase 1, regulatory (inhibitor) subunit 8 (Ppp1r8), mRNA.
44	3100004P22RIK	RMS0 RFS+	-0.191986	0.208694	0.0269434	0.00184653	0.257146	0.0277417	ILMN_2709456	Mus musculus RIKEN cDNA 3100004P22 gene (3100004P22Rik), mRNA.
45	D1BWG0212E	RMS0 RFS+	-0.0647704	0.357875	0.24468	0.00033269	0.618394	0.00979815	ILMN_2890284	Mus musculus DNA segment, Chr 1, Brigham & Women's Genetics 0212 expressed (D1Bwg0212e), mRNA.
46	ITGA7	RMS0 RFS+	-0.074095	0.282658	0.231326	5.32e-05	0.604271	0.00326872	ILMN_1257880
47	ASNA1	RMS0 RFS+	-0.0599178	0.298568	0.348801	0.00021309	0.702597	0.00742849	ILMN_2683374
48	FMIP	RMS0 RFS+	-0.118475	0.269647	0.0196317	0.00043083	0.224586	0.0116133	ILMN_2679755	Mus musculus THO complex 5 (Thoc5), mRNA.
49	YKT6	RMS0 RFS+	-0.175828	0.310234	0.00523775	0.00065203	0.139134	0.0148646	ILMN_1246405	Mus musculus YKT6 homolog (S. Cerevisiae) (Ykt6), mRNA.
50	RAF1	RMS0 RFS+	-0.152474	0.182575	0.018298	0.00210543	0.222043	0.030071	ILMN_2747229
51	CDK9	RMS0 RFS+	-0.0239227	0.304478	0.4627	2.29e-05	0.776182	0.00188105	ILMN_2683933
52	NCDN	RMS0 RFS+	0.0226554	0.2396	0.590132	0.00110383	0.842581	0.0209052	ILMN_1231405	Mus musculus neurochondrin (Ncdn), mRNA.
53	F12	RMS0 RFS+	-0.127226	0.358928	0.0320791	7.775e-05	0.276027	0.00409919	ILMN_2746692	Mus musculus coagulation factor XII (Hageman factor) (F12), mRNA.
54	SENP3	RMS0 RFS+	-0.0910324	0.311608	0.0703352	0.00012439	0.384753	0.00542035	ILMN_1225635	Mus musculus SUMO/sentrin specific peptidase 3 (Senp3), mRNA.
55	D1BWG0212E	RMS0 RFS+	-0.0257334	0.169937	0.416728	0.00293354	0.748455	0.0370368	ILMN_2616638	Mus musculus DNA segment, Chr 1, Brigham & Women's Genetics 0212 expressed (D1Bwg0212e), mRNA.
56	5830472M02RIK	RMS0 RFS+	-0.0459552	0.150572	0.273756	0.00328874	0.644392	0.039538	ILMN_1257566
57	LASS6	RMS0 RFS+	-0.0623513	0.163136	0.164132	0.00145653	0.534649	0.0245855	ILMN_2678580	Mus musculus longevity assurance homolog 6 (S. cerevisiae) (Lass6), mRNA.
58	DDX1	RMS0 RFS+	-0.0566552	0.269744	0.405308	0.00138367	0.740433	0.0237267	ILMN_2844316	Mus musculus DEAD (Asp-Glu-Ala-Asp) box polypeptide 1 (Ddx1), mRNA.
59	SSR3	RMS0 RFS+	0.0676976	0.284887	0.283551	0.00384945	0.652217	0.0432607	ILMN_2838645	Mus musculus signal sequence receptor, gamma (Ssr3), mRNA.
60	SSH3	RMS0 RFS+	0.0533011	0.265511	0.250223	0.00095845	0.622674	0.0192751	ILMN_1219080
61	TMEM38B	RMS0 RFS+	0.0429906	0.304436	0.473918	0.0012786	0.781527	0.0225165	ILMN_2795792	Mus musculus transmembrane protein 38B (Tmem38b), mRNA.
62	CHST2	RMS0 RFS+	-0.0703525	0.237003	0.221862	0.00272664	0.595233	0.0354222	ILMN_2687165	Mus musculus carbohydrate sulfotransferase 2 (Chst2), mRNA.
63	UBLE1B	RMS0 RFS+	-0.0384557	0.298385	0.379569	0.00114351	0.721462	0.0213132	ILMN_3160787
64	SLC30A7	RMS0 RFS+	-0.107728	0.270618	0.0674246	0.00212876	0.37832	0.0303535	ILMN_1233693	Mus musculus solute carrier family 30 (zinc transporter), member 7 (Slc30a7), mRNA.
65	9430010O03RIK	RMS0 RFS+	-0.107513	0.177801	0.0499342	0.00468865	0.332652	0.0486583	ILMN_2594128
66	STK2	RMS0 RFS+	-0.11105	0.249592	0.0487038	0.0024939	0.328837	0.0332558	ILMN_2759289
67	TIA1	RMS0 RFS+	-0.0723369	0.195082	0.129748	0.00095491	0.488292	0.0192356	ILMN_2911936	Mus musculus cytotoxic granule-associated RNA binding protein 1 (Tia1), mRNA.
68	PTPRK	RMS0 RFS+	-0.116282	0.330803	0.167453	0.00124645	0.537876	0.0222486	ILMN_2879600	Mus musculus protein tyrosine phosphatase, receptor type, K (Ptprk), mRNA.
69	TJAP1	RMS0 RFS+	-0.0938484	0.269337	0.0423346	0.00010878	0.310902	0.00504922	ILMN_2656465	Mus musculus tight junction associated protein 1 (Tjap1), mRNA.
70	5830457O10RIK	RMS0 RFS+	-0.153651	0.184164	0.00900216	0.00171389	0.175944	0.0265909	ILMN_2697766	Mus musculus RIKEN cDNA 5830457O10 gene (5830457O10Rik), mRNA.
71	TCEB3BP1	RMS0 RFS+	-0.0849598	0.214581	0.140638	0.0017895	0.50357	0.0271477	ILMN_2592554
72	YKT6	RMS0 RFS+	-0.0634207	0.218964	0.392598	0.00412715	0.732162	0.0452503	ILMN_2814976	Mus musculus YKT6 homolog (S. Cerevisiae) (Ykt6), mRNA.
73	SKIV2L	RMS0 RFS+	-0.0816447	0.225431	0.135707	0.00160196	0.496712	0.0256704	ILMN_2748317
74	LOC732482	RMS0 RFS+	-0.0597407	0.27629	0.212215	0.00310662	0.585537	0.0382329	ILMN_2785605	Mus musculus Fam58a pseudogene (LOC732482) on chromosome 8.
75	DCTN2	RMS0 RFS+	-0.0234307	0.267446	0.722591	0.00351172	0.901612	0.0408077	ILMN_2859659	Mus musculus dynactin 2 (Dctn2), mRNA.
76	NKIRAS2	RMS0 RFS+	0.0373514	0.284549	0.511993	0.00052139	0.802299	0.0131734	ILMN_2623184
77	2600002E23RIK	RMS0 RFS+	0.0138116	0.294638	0.817171	0.00456386	0.940703	0.0479699	ILMN_2643723	Mus musculus penta-EF hand domain containing 1 (Pef1), mRNA.
78	EXT1	RMS0 RFS+	0.0281725	0.235038	0.688514	0.00195685	0.889119	0.0286435	ILMN_2731989
79	9030624J02RIK	RMS0 RFS+	-0.0490739	0.282475	0.3661	0.00056974	0.714711	0.0139924	ILMN_2872639	Mus musculus RIKEN cDNA 9030624J02 gene (9030624J02Rik), mRNA.
80	SERBP1	RMS0 RFS+	-0.0602144	0.353689	0.423465	0.00061939	0.752413	0.0145991	ILMN_2683071	Mus musculus Serpine1 mRNA binding protein 1 (Serbp1), mRNA.
81	SGK3	RMS0 RFS+	-0.0305626	0.317344	0.464614	9.77e-06	0.77733	0.00112721	ILMN_2665359
82	CLIP1	RMS0 RFS+	-0.0176336	0.231803	0.67155	0.00214164	0.882231	0.0304133	ILMN_2920759	Mus musculus CAP-GLY domain containing linker protein 1 (Clip1), mRNA.
83	RIOK3	RMS0 RFS+	-0.0917297	0.322994	0.079582	0.00077272	0.402946	0.0166872	ILMN_2744752
84	WBP11	RMS0 RFS+	-0.0379857	0.281338	0.515016	0.00088798	0.803177	0.0184084	ILMN_1213144	Mus musculus WW domain binding protein 11 (Wbp11), mRNA.
85	ESP1	RMS0 RFS+	0.0235122	0.160552	0.456847	0.00077627	0.77185	0.0167215	ILMN_3161172	Mus musculus predicted gene, EG619517 (EG619517), mRNA.
86	EXOC8	RMS0 RFS+	0.0221205	0.222131	0.68864	0.00226407	0.889119	0.0314174	ILMN_2689560
87	FBXO28	RMS0 RFS+	-0.0313572	0.171182	0.518038	0.00325708	0.804678	0.0392919	ILMN_2653143
88	TSNAX	RMS0 RFS+	0.00624805	0.278608	0.904559	0.00049231	0.970373	0.0126082	ILMN_1227463
89	WBP2	RMS0 RFS+	-0.0334131	0.161612	0.477339	0.00338298	0.783772	0.040075	ILMN_1249698
90	PPP4R1	RMS0 RFS+	-0.0468585	0.198529	0.509968	0.00196003	0.801041	0.0286537	ILMN_2873510	Mus musculus protein phosphatase 4, regulatory subunit 1 (Ppp4r1), mRNA.
91	EIF2B5	RMS0 RFS+	-0.145399	0.262136	0.0135326	0.00173	0.199808	0.0267347	ILMN_2602140	Mus musculus eukaryotic translation initiation factor 2B, subunit 5 epsilon (Eif2b5), mRNA.
92	6330412F12RIK	RMS0 RFS+	-0.0747819	0.312806	0.157437	0.00093549	0.526907	0.0190464	ILMN_2765080
93	SMARCAD1	RMS0 RFS+	0.013163	0.289271	0.779677	0.00017876	0.927081	0.00664213	ILMN_1251870
94	SMUG1	RMS0 RFS+	0.0666143	0.179956	0.0780978	0.00377149	0.39978	0.0427502	ILMN_2620520	Mus musculus single-strand selective monofunctional uracil DNA glycosylase (Smug1), mRNA.
95	2310003P10RIK	RMS0 RFS+	0.0431456	0.236762	0.404928	0.00171376	0.7401	0.0265909	ILMN_2746107
96	ZDHHC6	RMS0 RFS+	-0.103596	0.27337	0.17496	0.0043568	0.54459	0.0466622	ILMN_3095059	Mus musculus zinc finger, DHHC domain containing 6 (Zdhhc6), transcript variant 2, mRNA.
97	AUP1	RMS0 RFS+	-0.0683767	0.280208	0.216953	0.00031311	0.590003	0.00944966	ILMN_2682623
98	STRN4	RMS0 RFS+	-0.0785843	0.226388	0.185472	0.00011733	0.557602	0.00519203	ILMN_3159156
99	NUP88	RMS0 RFS+	-0.0680113	0.252583	0.335464	0.00051149	0.692662	0.0129887	ILMN_3108109
100	FIZ1	RMS0 RFS+	-0.0362029	0.293776	0.595763	4.589e-05	0.844851	0.00296916	ILMN_2642313	Mus musculus Flt3 interacting zinc finger protein 1 (Fiz1), mRNA.
101	TBC1D13	RMS0 RFS+	-0.0640037	0.280494	0.283901	0.00386206	0.652217	0.0433714	ILMN_1218901	Mus musculus TBC1 domain family, member 13 (Tbc1d13), mRNA.
102	DDX52	RMS0 RFS+	0.00279489	0.257584	0.964934	0.00378573	0.990034	0.0428053	ILMN_2725504	Mus musculus DEAD (Asp-Glu-Ala-Asp) box polypeptide 52 (Ddx52), mRNA.
103	PIAS1	RMS0 RFS+	0.00927645	0.244243	0.871526	0.00269899	0.960473	0.0352748	ILMN_2737777
104	SF4	RMS0 RFS+	0.00494022	0.218198	0.935718	0.00335738	0.980298	0.0399379	ILMN_2607953
105	4930527D15RIK	RMS0 RFS+	-0.0227564	0.221192	0.691851	0.00264916	0.890598	0.0347359	ILMN_2756733	Mus musculus coiled-coil domain containing 130 (Ccdc130), mRNA.
106	CCHCR1	RMS0 RFS+	0.0101132	0.183611	0.857739	0.001642	0.955073	0.0261404	ILMN_2929518	Mus musculus coiled-coil alpha-helical rod protein 1 (Cchcr1), mRNA.
107	DHRSX	RMS0 RFS+	-0.0420454	0.333698	0.473286	0.00173864	0.781323	0.026789	ILMN_2436890
108	SLC4A2	RMS0 RFS+	-0.0452413	0.210188	0.473719	0.00473542	0.781389	0.0489106	ILMN_1239662	Mus musculus solute carrier family 4 (anion exchanger), member 2 (Slc4a2), mRNA.
109	BAT8	RMS0 RFS+	0.0810759	0.306748	0.260145	0.00065845	0.631894	0.0148948	ILMN_2705367	Mus musculus euchromatic histone lysine N-methyltransferase 2 (Ehmt2), transcript variant short, mRNA.
110	NR1H2	RMS0 RFS+	0.0869213	0.246203	0.132196	0.00021282	0.491919	0.00742849	ILMN_3014084	Mus musculus nuclear receptor subfamily 1, group H, member 2 (Nr1h2), mRNA.
111	1810007M14RIK	RMS0 RFS+	-0.147434	0.153186	0.0092187	0.00118329	0.177968	0.0215742	ILMN_2681311
112	ABCF1	RMS0 RFS+	-0.188491	0.206276	0.0006109	0.00233502	0.0628635	0.0320119	ILMN_2768926	Mus musculus ATP-binding cassette, sub-family F (GCN20), member 1 (Abcf1), mRNA.
113	USP30	RMS0 RFS+	-0.131134	0.193786	0.00081054	0.0002766	0.0728721	0.00873373	ILMN_3161250	Mus musculus ubiquitin specific peptidase 30 (Usp30), mRNA.
114	DNM2	RMS0 RFS+	-0.05243	0.1532	0.167171	0.00117722	0.537375	0.0215304	ILMN_1224114
115	CUGBP1	RMS0 RFS+	-0.255442	0.272076	0.00054971	9.542e-05	0.0600959	0.00469736	ILMN_2667972	Mus musculus CUG triplet repeat, RNA binding protein 1 (Cugbp1), transcript variant 2, mRNA.
116	CUGBP1	RMS0 RFS+	-0.232938	0.229214	0.00132753	0.00067906	0.0831481	0.0150645	ILMN_2667971	Mus musculus CUG triplet repeat, RNA binding protein 1 (Cugbp1), transcript variant 2, mRNA.
117	DDX27	RMS0 RFS+	-0.154809	0.212794	0.00629259	0.00257044	0.14991	0.0340902	ILMN_2944784	Mus musculus DEAD (Asp-Glu-Ala-Asp) box polypeptide 27 (Ddx27), mRNA.
118	2610029D06RIK	RMS0 RFS+	-0.0708873	0.246643	0.371815	0.00018707	0.717584	0.00679899	ILMN_2630710	Mus musculus zinc finger protein 623 (Zfp623), mRNA.
119	AP3S2	RMS0 RFS+	0.0143392	0.220643	0.801358	0.00091426	0.93455	0.0187447	ILMN_1244074	Mus musculus adaptor-related protein complex 3, sigma 2 subunit (Ap3s2), mRNA.
120	HDLBP	RMS0 RFS+	-0.0599682	0.30097	0.472267	9.888e-05	0.781065	0.00475806	ILMN_2795359	Mus musculus high density lipoprotein (HDL) binding protein (Hdlbp), mRNA.
121	NUP98	RMS0 RFS+	-0.0421739	0.189167	0.290215	0.0002273	0.657337	0.00765813	ILMN_2904083	Mus musculus nucleoporin 98 (Nup98), mRNA.
122	RFXANK	RMS0 RFS+	-0.0588086	0.184351	0.173045	0.00220816	0.543787	0.0309687	ILMN_3125181	Mus musculus regulatory factor X-associated ankyrin-containing protein (Rfxank), transcript variant 2, mRNA.
123	DDX24	RMS0 RFS+	-0.0806322	0.241126	0.0729972	0.00154536	0.389425	0.0253095	ILMN_2971567	Mus musculus DEAD (Asp-Glu-Ala-Asp) box polypeptide 24 (Ddx24), mRNA.
124	QARS	RMS0 RFS+	-0.0714768	0.248828	0.341396	0.00335229	0.697099	0.0399246	ILMN_2989257	Mus musculus glutaminyl-tRNA synthetase (Qars), mRNA.
125	JMJD2B	RMS0 RFS+	-0.0454877	0.306895	0.459206	0.00014479	0.773309	0.00598881	ILMN_2990420	Mus musculus jumonji domain containing 2B (Jmjd2b), mRNA.
126	SUPT5H	RMS0 RFS+	-0.0201121	0.211654	0.764237	0.00162229	0.92157	0.0259475	ILMN_2950441	Mus musculus suppressor of Ty 5 homolog (S. cerevisiae) (Supt5h), mRNA.
127	SUPT6H	RMS0 RFS+	-0.0832594	0.281287	0.250986	0.00127835	0.622967	0.0225165	ILMN_1242264
128	AP1G1	RMS0 RFS+	-0.175983	0.171479	0.00101903	0.0015406	0.0791231	0.0253044	ILMN_2745354
129	TOP1	RMS0 RFS+	-0.177863	0.254324	0.00532179	0.00028994	0.140063	0.00902908	ILMN_1232251
130	C530050O22RIK	RMS0 RFS+	-0.0596344	0.198099	0.169283	0.00065812	0.539091	0.0148948	ILMN_2592779
131	ZMPSTE24	RMS0 RFS+	-0.0892022	0.305715	0.150859	0.00017675	0.517285	0.00664213	ILMN_2471634
132	PI4K2A	RMS0 RFS+	-0.218663	0.306406	0.00093324	0.00158172	0.0765725	0.0255378	ILMN_2689025
133	SUPT5H	RMS0 RFS+	-0.0949284	0.310992	0.161014	0.00011804	0.530689	0.00519676	ILMN_2661458	Mus musculus suppressor of Ty 5 homolog (S. cerevisiae) (Supt5h), mRNA.
134	NARG1L	RMS0 RFS+	-0.0988376	0.193748	0.124026	0.00221093	0.479865	0.030982	ILMN_2733933	Mus musculus NMDA receptor regulated 1-like (Narg1l), mRNA.
135	SCARB1	RMS0 RFS+	-0.0705232	0.215863	0.221558	0.00143952	0.595099	0.0243706	ILMN_1223315	Mus musculus scavenger receptor class B, member 1 (Scarb1), mRNA.
136	ADAR	RMS0 RFS+	-0.142523	0.316667	0.0703737	0.00121642	0.384753	0.0219186	ILMN_3021272	Mus musculus adenosine deaminase, RNA-specific (Adar), transcript variant 1, mRNA.
137	PSEN1	RMS0 RFS+	-0.147133	0.331254	0.0129339	0.00092938	0.19798	0.0189674	ILMN_1214811
138	GART	RMS0 RFS+	-0.160374	0.369847	0.0376902	0.00057894	0.298037	0.0140719	ILMN_1225226
139	2610014H22RIK	RMS0 RFS+	-0.0868037	0.285842	0.158076	0.00333842	0.527824	0.0399068	ILMN_2699833
140	1110059F07RIK	RMS0 RFS+	-0.17028	0.370471	0.00497335	0.00117638	0.136097	0.0215304	ILMN_1217055
141	UBAP2L	RMS0 RFS+	-0.127591	0.282586	0.0261138	0.00131227	0.254029	0.0229673	ILMN_2479024	Mus musculus ubiquitin associated protein 2-like (Ubap2l), transcript variant 1, mRNA.
[truncated: 1,462 more rows]

## Sheet: 5. IPA 6-months Rapa F|Ctrl F
Ingenuity Canonical Pathways	B-H p-value	Ratio Changed	Downregulated	Upregulated	No overlap with dataset	Molecules
[truncated: 3 more rows]

[truncated: 1 more sheets: 6. Genes-6-mon vs. Chronic Rapa]
