# Supplementary material for: Mice Fed Rapamycin Have an Increase in Lifespan Associated with Major Changes in the Liver Transcriptome
Source: PLoS One. 2014 Jan 7;9(1):e83988. doi: 10.1371/journal.pone.0083988 (PMC3883653; doi:10.1371/journal.pone.0083988)
Supplement: File S4 — File containing data for DAVID gene enrichment analysis ranked by enrichment score using genes significantly changed in chronic Rapa-2 male, chronic Rapa female, and 6-months Rapa females. (XLSX) [file pone.0083988.s004.xlsx]

## Sheet: 1. Chronic Rapa-2 male up
Annotation Cluster 1	Enrichment Score: 23.907541589750736
Category	Term	Count	%	PValue	Genes	List Total	Pop Hits	Pop Total	Fold Enrichment	Bonferroni	Benjamini	FDR
GOTERM_CC_FAT	GO:0031974~membrane-enclosed lumen	241	11.699	4.97711e-28	ILMN_1254639, ILMN_2851889, ILMN_2659132, ILMN_1219978, ILMN_2749847, ILMN_2733179, ILMN_2623793, ILMN_2851888, ILMN_2434503, ILMN_1248852, ILMN_3055904, ILMN_2841840, ILMN_2666669, ILMN_2633333, ILMN_2648746, ILMN_2699989, ILMN_2652394, ILMN_2999642, ILMN_2783429, ILMN_1244296, ILMN_2920800, ILMN_3142235, ILMN_2600627, ILMN_2984012, ILMN_2957589, ILMN_2631813, ILMN_2997308, ILMN_2971744, ILMN_12…	1289	1174	12504	1.99134	2.61298e-25	2.61298e-25	7.2164e-25
GOTERM_CC_FAT	GO:0070013~intracellular organelle lumen	234	11.3592	1.46188e-27	ILMN_1254639, ILMN_2851889, ILMN_2659132, ILMN_1219978, ILMN_2749847, ILMN_2733179, ILMN_2623793, ILMN_2851888, ILMN_2434503, ILMN_1248852, ILMN_3055904, ILMN_2841840, ILMN_2666669, ILMN_2633333, ILMN_2648746, ILMN_2699989, ILMN_2652394, ILMN_2999642, ILMN_2783429, ILMN_1244296, ILMN_2920800, ILMN_3142235, ILMN_2600627, ILMN_2984012, ILMN_2957589, ILMN_2631813, ILMN_2997308, ILMN_2971744, ILMN_12…	1289	1133	12504	2.00347	7.67485e-25	3.83742e-25	2.1196e-24
GOTERM_CC_FAT	GO:0043233~organelle lumen	234	11.3592	2.17473e-27	ILMN_1254639, ILMN_2851889, ILMN_2659132, ILMN_1219978, ILMN_2749847, ILMN_2733179, ILMN_2623793, ILMN_2851888, ILMN_2434503, ILMN_1248852, ILMN_3055904, ILMN_2841840, ILMN_2666669, ILMN_2633333, ILMN_2648746, ILMN_2699989, ILMN_2652394, ILMN_2999642, ILMN_2783429, ILMN_1244296, ILMN_2920800, ILMN_3142235, ILMN_2600627, ILMN_2984012, ILMN_2957589, ILMN_2631813, ILMN_2997308, ILMN_2971744, ILMN_12…	1289	1136	12504	1.99818	1.14173e-24	3.80577e-25	3.15318e-24
GOTERM_CC_FAT	GO:0031981~nuclear lumen	197	9.56311	2.24147e-27	ILMN_1254639, ILMN_2851889, ILMN_2659132, ILMN_1219978, ILMN_2749847, ILMN_2851888, ILMN_1248852, ILMN_2623793, ILMN_3055904, ILMN_2666669, ILMN_2633333, ILMN_2699989, ILMN_2652394, ILMN_2999642, ILMN_2783429, ILMN_1244296, ILMN_2920800, ILMN_3142235, ILMN_2600627, ILMN_2957589, ILMN_2631813, ILMN_2997308, ILMN_2971744, ILMN_3121891, ILMN_2869461, ILMN_2757006, ILMN_3102643, ILMN_2904641, ILMN_28…	1289	883	12504	2.16422	1.17677e-24	2.94193e-25	3.24995e-24
GOTERM_CC_FAT	GO:0005654~nucleoplasm	137	6.65049	5.5877e-20	ILMN_1254639, ILMN_2599858, ILMN_2659132, ILMN_1219978, ILMN_2745540, ILMN_2749847, ILMN_1248852, ILMN_2623793, ILMN_3055904, ILMN_2666669, ILMN_2655694, ILMN_1256671, ILMN_2699989, ILMN_2652394, ILMN_3110425, ILMN_1228414, ILMN_2783429, ILMN_2972325, ILMN_2920800, ILMN_2934534, ILMN_1246873, ILMN_2698282, ILMN_3142235, ILMN_2957589, ILMN_2631813, ILMN_2997308, ILMN_2971744, ILMN_2790735, ILMN_28…	1289	599	12504	2.21866	2.93354e-17	4.88924e-18	8.10171e-17
GOTERM_CC_FAT	GO:0044451~nucleoplasm part	118	5.72816	1.81005e-17	ILMN_1254639, ILMN_2599858, ILMN_2659132, ILMN_1219978, ILMN_2745540, ILMN_2749847, ILMN_1248852, ILMN_2623793, ILMN_3055904, ILMN_2655694, ILMN_2652394, ILMN_1228414, ILMN_2783429, ILMN_2920800, ILMN_2698282, ILMN_1246873, ILMN_3142235, ILMN_2957589, ILMN_2631813, ILMN_2997308, ILMN_2790735, ILMN_2869461, ILMN_2652575, ILMN_2842767, ILMN_2736611, ILMN_3102643, ILMN_1252302, ILMN_3102072, ILMN_26…	1289	513	12504	2.23131	9.50279e-15	1.35754e-15	2.62443e-14
Annotation Cluster 2	Enrichment Score: 10.444241174679698
Category	Term	Count	%	PValue	Genes	List Total	Pop Hits	Pop Total	Fold Enrichment	Bonferroni	Benjamini	FDR
GOTERM_BP_FAT	GO:0044265~cellular macromolecule catabolic process	126	6.1165	2.27737e-13	ILMN_2471268, ILMN_2495939, ILMN_2724386, ILMN_3109076, ILMN_2990220, ILMN_1224561, ILMN_2796353, ILMN_1214110, ILMN_2423789, ILMN_1221255, ILMN_2662743, ILMN_2783429, ILMN_2606015, ILMN_2717569, ILMN_2594718, ILMN_1236369, ILMN_3021465, ILMN_1250929, ILMN_1254644, ILMN_1244297, ILMN_2971946, ILMN_3005669, ILMN_2886468, ILMN_2741726, ILMN_2682811, ILMN_2796089, ILMN_2418324, ILMN_2850753, ILMN_12…	1454	609	13588	1.9335	7.36176e-10	1.22696e-10	4.13436e-10
GOTERM_BP_FAT	GO:0009057~macromolecule catabolic process	131	6.35922	8.48581e-13	ILMN_2471268, ILMN_2495939, ILMN_2724386, ILMN_3109076, ILMN_2990220, ILMN_1224561, ILMN_2796353, ILMN_1214110, ILMN_2423789, ILMN_1221255, ILMN_2662743, ILMN_2783429, ILMN_2606015, ILMN_2717569, ILMN_1236369, ILMN_2594718, ILMN_3021465, ILMN_1250929, ILMN_1254644, ILMN_1244297, ILMN_2971946, ILMN_3005669, ILMN_2886468, ILMN_2741726, ILMN_2682811, ILMN_2796089, ILMN_2418324, ILMN_2850753, ILMN_12…	1454	654	13588	1.87191	2.74334e-09	3.42918e-10	1.54068e-09
GOTERM_BP_FAT	GO:0051603~proteolysis involved in cellular protein catabolic process	112	5.43689	2.32263e-12	ILMN_2471268, ILMN_2495939, ILMN_2724386, ILMN_3109076, ILMN_2990220, ILMN_1224561, ILMN_2796353, ILMN_1214110, ILMN_2423789, ILMN_2662743, ILMN_2606015, ILMN_2717569, ILMN_2594718, ILMN_1236369, ILMN_3021465, ILMN_1250929, ILMN_1254644, ILMN_1244297, ILMN_3005669, ILMN_2886468, ILMN_2682811, ILMN_2796089, ILMN_2418324, ILMN_2850753, ILMN_1239724, ILMN_1230583, ILMN_3161591, ILMN_2512043, ILMN_28…	1454	534	13588	1.96005	7.50892e-09	8.34325e-10	4.21705e-09
GOTERM_BP_FAT	GO:0030163~protein catabolic process	115	5.58252	2.97345e-12	ILMN_2471268, ILMN_2495939, ILMN_2724386, ILMN_3109076, ILMN_2990220, ILMN_1224561, ILMN_2796353, ILMN_1214110, ILMN_2423789, ILMN_2662743, ILMN_2606015, ILMN_2717569, ILMN_2594718, ILMN_1236369, ILMN_3021465, ILMN_1250929, ILMN_1254644, ILMN_1244297, ILMN_3005669, ILMN_2886468, ILMN_2682811, ILMN_2796089, ILMN_2418324, ILMN_2850753, ILMN_1239724, ILMN_1230583, ILMN_3161591, ILMN_2512043, ILMN_28…	1454	556	13588	1.93292	9.613e-09	9.613e-10	5.39871e-09
GOTERM_BP_FAT	GO:0044257~cellular protein catabolic process	112	5.43689	3.38165e-12	ILMN_2471268, ILMN_2495939, ILMN_2724386, ILMN_3109076, ILMN_2990220, ILMN_1224561, ILMN_2796353, ILMN_1214110, ILMN_2423789, ILMN_2662743, ILMN_2606015, ILMN_2717569, ILMN_2594718, ILMN_1236369, ILMN_3021465, ILMN_1250929, ILMN_1254644, ILMN_1244297, ILMN_3005669, ILMN_2886468, ILMN_2682811, ILMN_2796089, ILMN_2418324, ILMN_2850753, ILMN_1239724, ILMN_1230583, ILMN_3161591, ILMN_2512043, ILMN_28…	1454	537	13588	1.9491	1.09328e-08	9.93891e-10	6.13992e-09
GOTERM_BP_FAT	GO:0043632~modification-dependent macromolecule catabolic process	106	5.14563	1.34383e-11	ILMN_2471268, ILMN_2495939, ILMN_2724386, ILMN_3109076, ILMN_2990220, ILMN_1224561, ILMN_2796353, ILMN_1214110, ILMN_2423789, ILMN_2662743, ILMN_2606015, ILMN_2717569, ILMN_1236369, ILMN_3021465, ILMN_1250929, ILMN_1254644, ILMN_1244297, ILMN_3005669, ILMN_2886468, ILMN_2682811, ILMN_2796089, ILMN_2418324, ILMN_2850753, ILMN_1230583, ILMN_2512043, ILMN_3161591, ILMN_2864798, ILMN_2602588, ILMN_28…	1454	508	13588	1.94999	4.34459e-08	3.62049e-09	2.43994e-08
GOTERM_BP_FAT	GO:0019941~modification-dependent protein catabolic process	106	5.14563	1.34383e-11	ILMN_2471268, ILMN_2495939, ILMN_2724386, ILMN_3109076, ILMN_2990220, ILMN_1224561, ILMN_2796353, ILMN_1214110, ILMN_2423789, ILMN_2662743, ILMN_2606015, ILMN_2717569, ILMN_1236369, ILMN_3021465, ILMN_1250929, ILMN_1254644, ILMN_1244297, ILMN_3005669, ILMN_2886468, ILMN_2682811, ILMN_2796089, ILMN_2418324, ILMN_2850753, ILMN_1230583, ILMN_2512043, ILMN_3161591, ILMN_2864798, ILMN_2602588, ILMN_28…	1454	508	13588	1.94999	4.34459e-08	3.62049e-09	2.43994e-08
SP_PIR_KEYWORDS	ubl conjugation pathway	100	4.85437	3.96953e-10	ILMN_2495939, ILMN_2724386, ILMN_3109076, ILMN_2990220, ILMN_1224561, ILMN_2796353, ILMN_1214110, ILMN_2423789, ILMN_2606015, ILMN_2717569, ILMN_1236369, ILMN_3021465, ILMN_1250929, ILMN_1254644, ILMN_3005669, ILMN_2886468, ILMN_2682811, ILMN_2796089, ILMN_2850753, ILMN_1230583, ILMN_2512043, ILMN_3161591, ILMN_1246452, ILMN_2864798, ILMN_2878501, ILMN_2602588, ILMN_2667100, ILMN_2512042, ILMN_26…	1951	484	17854	1.89074	1.98079e-07	1.98079e-08	5.71468e-07
GOTERM_BP_FAT	GO:0006508~proteolysis	146	7.08738	0.000310392	ILMN_2471268, ILMN_2495939, ILMN_2724386, ILMN_3109076, ILMN_2990220, ILMN_1224561, ILMN_2796353, ILMN_1214110, ILMN_2423789, ILMN_2662743, ILMN_2761082, ILMN_2606015, ILMN_2717569, ILMN_1236369, ILMN_2594718, ILMN_3021465, ILMN_1250929, ILMN_2648548, ILMN_1254644, ILMN_1244297, ILMN_3005669, ILMN_2886468, ILMN_2464898, ILMN_2682811, ILMN_2796089, ILMN_1239494, ILMN_2418324, ILMN_2850753, ILMN_12…	1454	1034	13588	1.31954	0.633462	0.0158048	0.562072
Annotation Cluster 3	Enrichment Score: 10.315430291964686
Category	Term	Count	%	PValue	Genes	List Total	Pop Hits	Pop Total	Fold Enrichment	Bonferroni	Benjamini	FDR
GOTERM_BP_FAT	GO:0006396~RNA processing	112	5.43689	5.05433e-19	ILMN_2471268, ILMN_1253012, ILMN_2970691, ILMN_3145415, ILMN_1256671, ILMN_1218584, ILMN_1243711, ILMN_2893077, ILMN_2828838, ILMN_2920800, ILMN_2773302, ILMN_2934534, ILMN_1249624, ILMN_2698282, ILMN_3142235, ILMN_2971946, ILMN_2741726, ILMN_2970685, ILMN_2631813, ILMN_1254444, ILMN_1251876, ILMN_3102072, ILMN_2859678, ILMN_1249116, ILMN_2930364, ILMN_2895293, ILMN_2857086, ILMN_2740053, ILMN_12…	1454	437	13588	2.39512	1.63407e-15	1.63407e-15	9.177e-16
GOTERM_BP_FAT	GO:0006397~mRNA processing	71	3.4466	1.84108e-13	ILMN_2975640, ILMN_2471268, ILMN_1254380, ILMN_2634749, ILMN_2970691, ILMN_2690772, ILMN_1256671, ILMN_2760840, ILMN_3145415, ILMN_2942492, ILMN_1243711, ILMN_2810331, ILMN_1228352, ILMN_2828838, ILMN_1220586, ILMN_2920800, ILMN_2773302, ILMN_2934534, ILMN_1239645, ILMN_2698282, ILMN_1217753, ILMN_3142235, ILMN_2971946, ILMN_2613841, ILMN_2741726, ILMN_2970685, ILMN_2631813, ILMN_2835346, ILMN_26…	1454	262	13588	2.53249	5.95114e-10	1.19023e-10	3.34222e-10
SP_PIR_KEYWORDS	mrna processing	68	3.30097	2.02982e-13	ILMN_2975640, ILMN_2471268, ILMN_1254380, ILMN_2634749, ILMN_2970691, ILMN_1256671, ILMN_2760840, ILMN_3145415, ILMN_2690772, ILMN_2942492, ILMN_1243711, ILMN_2810331, ILMN_1228352, ILMN_2828838, ILMN_1220586, ILMN_2920800, ILMN_2773302, ILMN_2934534, ILMN_2698282, ILMN_1217753, ILMN_3142235, ILMN_2971946, ILMN_2613841, ILMN_2741726, ILMN_2970685, ILMN_2631813, ILMN_2835346, ILMN_2449335, ILMN_12…	1951	240	17854	2.59284	1.01271e-10	2.02542e-11	2.92177e-10
GOTERM_BP_FAT	GO:0016071~mRNA metabolic process	77	3.73786	4.85187e-13	ILMN_2975640, ILMN_2471268, ILMN_1254380, ILMN_2697060, ILMN_2634749, ILMN_2970691, ILMN_2690772, ILMN_3145415, ILMN_1256671, ILMN_2760840, ILMN_3121255, ILMN_2942492, ILMN_1243711, ILMN_2783429, ILMN_2810331, ILMN_1228352, ILMN_2828838, ILMN_1220586, ILMN_2920800, ILMN_1239645, ILMN_2773302, ILMN_2934534, ILMN_2698282, ILMN_1217753, ILMN_3142235, ILMN_2971946, ILMN_2613841, ILMN_2741726, ILMN_29…	1454	302	13588	2.38273	1.56855e-09	2.24078e-10	8.80906e-10
GOTERM_BP_FAT	GO:0008380~RNA splicing	56	2.71845	2.67714e-11	ILMN_2975640, ILMN_2471268, ILMN_1254380, ILMN_2634749, ILMN_2970691, ILMN_1256671, ILMN_2760840, ILMN_2690772, ILMN_2942492, ILMN_2810331, ILMN_1228352, ILMN_2828838, ILMN_2920800, ILMN_2934534, ILMN_2698282, ILMN_3142235, ILMN_1217753, ILMN_2971946, ILMN_2613841, ILMN_2741726, ILMN_2970685, ILMN_2631813, ILMN_2835346, ILMN_2449335, ILMN_1224598, ILMN_1251876, ILMN_3102072, ILMN_3140788, ILMN_29…	1454	201	13588	2.60365	8.65522e-08	6.65786e-09	4.86082e-08
SP_PIR_KEYWORDS	mrna splicing	53	2.57282	2.70267e-10	ILMN_2975640, ILMN_2471268, ILMN_2634749, ILMN_2970691, ILMN_1256671, ILMN_2760840, ILMN_2690772, ILMN_2942492, ILMN_2810331, ILMN_2828838, ILMN_1228352, ILMN_2920800, ILMN_2934534, ILMN_2698282, ILMN_3142235, ILMN_1217753, ILMN_2971946, ILMN_2613841, ILMN_2741726, ILMN_2970685, ILMN_2631813, ILMN_2835346, ILMN_2449335, ILMN_1224598, ILMN_1251876, ILMN_3102072, ILMN_3140788, ILMN_2930364, ILMN_28…	1951	191	17854	2.53934	1.34863e-07	1.49848e-08	3.89087e-07
GOTERM_CC_FAT	GO:0005681~spliceosome	34	1.65049	2.07427e-07	ILMN_2684987, ILMN_2975640, ILMN_2478523, ILMN_2634749, ILMN_2511051, ILMN_1255323, ILMN_2970691, ILMN_2760840, ILMN_2690772, ILMN_1256671, ILMN_1212636, ILMN_2942492, ILMN_2667509, ILMN_2684494, ILMN_1236796, ILMN_2729870, ILMN_2828838, ILMN_2920800, ILMN_2934534, ILMN_3142235, ILMN_2613841, ILMN_2741726, ILMN_2970685, ILMN_2631813, ILMN_2835346, ILMN_2449335, ILMN_1224598, ILMN_3102072, ILMN_29…	1289	124	12504	2.65983	0.000108893	6.40582e-06	0.000300752
SP_PIR_KEYWORDS	Spliceosome	32	1.5534	5.71855e-07	ILMN_2684987, ILMN_2975640, ILMN_2511051, ILMN_1255323, ILMN_2970691, ILMN_2760840, ILMN_2690772, ILMN_1256671, ILMN_1212636, ILMN_2942492, ILMN_2667509, ILMN_2684494, ILMN_1236796, ILMN_2729870, ILMN_2828838, ILMN_2920800, ILMN_2934534, ILMN_3142235, ILMN_2613841, ILMN_2741726, ILMN_2970685, ILMN_2631813, ILMN_2835346, ILMN_2449335, ILMN_1224598, ILMN_3102072, ILMN_2930364, ILMN_2829171, ILMN_28…	1951	111	17854	2.63819	0.000285315	1.35883e-05	0.00082326
KEGG_PATHWAY	mmu03040:Spliceosome	29	1.40777	0.00018425	ILMN_2975640, ILMN_2471268, ILMN_2511051, ILMN_2970691, ILMN_2667509, ILMN_3161767, ILMN_2810331, ILMN_2746924, ILMN_2828838, ILMN_1228352, ILMN_1239645, ILMN_2934534, ILMN_2698282, ILMN_3142235, ILMN_2971946, ILMN_2613841, ILMN_2741726, ILMN_2970685, ILMN_3162184, ILMN_2835346, ILMN_2930364, ILMN_1237140, ILMN_1235470, ILMN_2669441, ILMN_2850527, ILMN_2857086, ILMN_2944150, ILMN_1245987, ILMN_29…	643	124	5738	2.08702	0.0322675	0.00467469	0.226291
Annotation Cluster 4	Enrichment Score: 9.541587071727669
Category	Term	Count	%	PValue	Genes	List Total	Pop Hits	Pop Total	Fold Enrichment	Bonferroni	Benjamini	FDR
GOTERM_BP_FAT	GO:0008104~protein localization	149	7.23301	4.95144e-14	ILMN_1248850, ILMN_2434503, ILMN_2718815, ILMN_2745354, ILMN_1214394, ILMN_2805945, ILMN_2630767, ILMN_2630768, ILMN_3127335, ILMN_1216919, ILMN_2626653, ILMN_3110425, ILMN_1237323, ILMN_3116330, ILMN_2681670, ILMN_3085841, ILMN_1250929, ILMN_2855397, ILMN_2670415, ILMN_2953411, ILMN_3161591, ILMN_2963223, ILMN_2507286, ILMN_2940595, ILMN_2777284, ILMN_2667100, ILMN_2850849, ILMN_2618461, ILMN_26…	1454	753	13588	1.84919	1.60085e-10	8.00425e-11	8.99059e-11
GOTERM_BP_FAT	GO:0015031~protein transport	134	6.50485	5.2683e-14	ILMN_1248850, ILMN_2434503, ILMN_2745354, ILMN_1214394, ILMN_2805945, ILMN_2630767, ILMN_3127335, ILMN_2630768, ILMN_1216919, ILMN_2626653, ILMN_3110425, ILMN_1237323, ILMN_2681670, ILMN_1250929, ILMN_2855397, ILMN_2670415, ILMN_3161591, ILMN_2963223, ILMN_2507286, ILMN_2940595, ILMN_2777284, ILMN_2667100, ILMN_2850849, ILMN_2618461, ILMN_2672767, ILMN_2695718, ILMN_2864844, ILMN_3147944, ILMN_27…	1454	651	13588	1.9236	1.70494e-10	5.68314e-11	9.57456e-11
GOTERM_BP_FAT	GO:0045184~establishment of protein localization	134	6.50485	9.6181e-14	ILMN_1248850, ILMN_2434503, ILMN_2745354, ILMN_1214394, ILMN_2805945, ILMN_2630767, ILMN_3127335, ILMN_2630768, ILMN_1216919, ILMN_2626653, ILMN_3110425, ILMN_1237323, ILMN_2681670, ILMN_1250929, ILMN_2855397, ILMN_2670415, ILMN_3161591, ILMN_2963223, ILMN_2507286, ILMN_2940595, ILMN_2777284, ILMN_2667100, ILMN_2850849, ILMN_2618461, ILMN_2672767, ILMN_2695718, ILMN_2864844, ILMN_3147944, ILMN_27…	1454	656	13588	1.90894	3.10838e-10	7.77094e-11	1.74571e-10
SP_PIR_KEYWORDS	protein transport	102	4.95146	4.10676e-12	ILMN_1248850, ILMN_2745354, ILMN_2805945, ILMN_2630767, ILMN_2630768, ILMN_1216919, ILMN_2626653, ILMN_3110425, ILMN_2681670, ILMN_2855397, ILMN_1250929, ILMN_2963223, ILMN_2777284, ILMN_2667100, ILMN_2850849, ILMN_2618461, ILMN_2672767, ILMN_2695718, ILMN_2864844, ILMN_3147944, ILMN_1244414, ILMN_1251572, ILMN_3143246, ILMN_1216394, ILMN_2664491, ILMN_1237090, ILMN_3024099, ILMN_2887208, ILMN_26…	1951	461	17854	2.02478	2.04925e-09	2.56156e-10	5.91217e-09
GOTERM_BP_FAT	GO:0046907~intracellular transport	89	4.32039	1.23233e-09	ILMN_1248850, ILMN_3034877, ILMN_2434503, ILMN_2745354, ILMN_1214394, ILMN_2630767, ILMN_2630768, ILMN_3127335, ILMN_1216919, ILMN_2652187, ILMN_2626653, ILMN_2855397, ILMN_2698282, ILMN_2670415, ILMN_1253410, ILMN_2940595, ILMN_2695718, ILMN_2755258, ILMN_3147944, ILMN_1244414, ILMN_1213711, ILMN_1251572, ILMN_3143246, ILMN_1222803, ILMN_2790573, ILMN_2664491, ILMN_1237090, ILMN_2992541, ILMN_26…	1454	431	13588	1.92976	3.98412e-06	2.65608e-07	2.23751e-06
GOTERM_BP_FAT	GO:0070727~cellular macromolecule localization	66	3.20388	2.01145e-08	ILMN_2764995, ILMN_1248850, ILMN_2421431, ILMN_2434503, ILMN_3141830, ILMN_2745354, ILMN_1214394, ILMN_3127335, ILMN_2972149, ILMN_1216919, ILMN_2626653, ILMN_1255725, ILMN_2893683, ILMN_2997998, ILMN_2855397, ILMN_2617265, ILMN_2953411, ILMN_2670415, ILMN_1244874, ILMN_2466845, ILMN_2971286, ILMN_2923599, ILMN_3135931, ILMN_2604688, ILMN_2940595, ILMN_2946862, ILMN_3162476, ILMN_2999007, ILMN_26…	1454	301	13588	2.04913	6.50282e-05	3.8253e-06	3.65214e-05
GOTERM_BP_FAT	GO:0006886~intracellular protein transport	62	3.00971	2.23314e-08	ILMN_2764995, ILMN_1248850, ILMN_2421431, ILMN_2434503, ILMN_3141830, ILMN_2745354, ILMN_1214394, ILMN_3127335, ILMN_2972149, ILMN_1216919, ILMN_2626653, ILMN_1255725, ILMN_2893683, ILMN_2997998, ILMN_2855397, ILMN_2617265, ILMN_2670415, ILMN_1244874, ILMN_2466845, ILMN_2971286, ILMN_2923599, ILMN_3135931, ILMN_2604688, ILMN_2940595, ILMN_3162476, ILMN_2695718, ILMN_3147944, ILMN_1212894, ILMN_12…	1454	276	13588	2.0993	7.21948e-05	4.01096e-06	4.05465e-05
GOTERM_BP_FAT	GO:0034613~cellular protein localization	65	3.15534	3.67958e-08	ILMN_2764995, ILMN_1248850, ILMN_2421431, ILMN_2434503, ILMN_3141830, ILMN_2745354, ILMN_1214394, ILMN_3127335, ILMN_2972149, ILMN_1216919, ILMN_2626653, ILMN_1255725, ILMN_2893683, ILMN_2997998, ILMN_2855397, ILMN_2617265, ILMN_2953411, ILMN_2670415, ILMN_1244874, ILMN_2466845, ILMN_2971286, ILMN_2923599, ILMN_3135931, ILMN_2604688, ILMN_2940595, ILMN_2946862, ILMN_3162476, ILMN_2695718, ILMN_31…	1454	299	13588	2.03158	0.000118954	6.26108e-06	6.68091e-05
SP_PIR_KEYWORDS	transport	212	10.2913	0.000636464	ILMN_2590779, ILMN_1248850, ILMN_2685157, ILMN_2745354, ILMN_1221255, ILMN_2805945, ILMN_2630767, ILMN_2630768, ILMN_1216919, ILMN_2681670, ILMN_2776910, ILMN_2855397, ILMN_2776911, ILMN_2984012, ILMN_1251771, ILMN_2919263, ILMN_2963223, ILMN_2632073, ILMN_2777284, ILMN_2756379, ILMN_1244414, ILMN_1213711, ILMN_1251572, ILMN_3143246, ILMN_3142224, ILMN_1242435, ILMN_1229238, ILMN_2641449, ILMN_12…	1951	1571	17854	1.23492	0.272177	0.00811298	0.912381
Annotation Cluster 5	Enrichment Score: 8.746477995139083
Category	Term	Count	%	PValue	Genes	List Total	Pop Hits	Pop Total	Fold Enrichment	Bonferroni	Benjamini	FDR
GOTERM_CC_FAT	GO:0005739~mitochondrion	246	11.9417	2.91302e-22	ILMN_3034877, ILMN_2733179, ILMN_2623793, ILMN_2841840, ILMN_1241035, ILMN_3026198, ILMN_2636803, ILMN_2648746, ILMN_3154111, ILMN_2691345, ILMN_2972392, ILMN_2727992, ILMN_2756460, ILMN_2984012, ILMN_2619671, ILMN_3163347, ILMN_1251771, ILMN_1231390, ILMN_2919263, ILMN_2757008, ILMN_2679851, ILMN_1259148, ILMN_2689259, ILMN_1246452, ILMN_2859678, ILMN_2632073, ILMN_3146224, ILMN_2644606, ILMN_29…	1289	1322	12504	1.80509	1.52933e-19	3.05867e-20	4.22364e-19
SP_PIR_KEYWORDS	mitochondrion	152	7.37864	2.43756e-12	ILMN_3034877, ILMN_2733179, ILMN_2750314, ILMN_2841840, ILMN_1241035, ILMN_1234901, ILMN_2720180, ILMN_2621074, ILMN_2688721, ILMN_2962632, ILMN_1213914, ILMN_2648746, ILMN_2666061, ILMN_2626653, ILMN_2747677, ILMN_2972392, ILMN_2691345, ILMN_2857581, ILMN_2727992, ILMN_2756460, ILMN_2647156, ILMN_2619671, ILMN_2984012, ILMN_2746906, ILMN_3163347, ILMN_1251771, ILMN_2646556, ILMN_1231390, ILMN_26…	1951	790	17854	1.76074	1.21637e-09	1.73766e-10	3.50927e-09
GOTERM_CC_FAT	GO:0031967~organelle envelope	109	5.29126	4.94591e-12	ILMN_2718815, ILMN_2639397, ILMN_3108560, ILMN_2720180, ILMN_2796651, ILMN_2962632, ILMN_1213914, ILMN_2666061, ILMN_2626653, ILMN_3110425, ILMN_2747677, ILMN_2972392, ILMN_2691345, ILMN_1250929, ILMN_2756460, ILMN_2670415, ILMN_2984012, ILMN_1251771, ILMN_3121891, ILMN_2919263, ILMN_2689259, ILMN_2632073, ILMN_2618461, ILMN_2602406, ILMN_2636384, ILMN_2677170, ILMN_1251572, ILMN_3142224, ILMN_31…	1289	540	12504	1.95807	2.59661e-09	2.88513e-10	7.1712e-09
GOTERM_CC_FAT	GO:0031975~envelope	109	5.29126	6.27816e-12	ILMN_2718815, ILMN_2639397, ILMN_3108560, ILMN_2720180, ILMN_2796651, ILMN_2962632, ILMN_1213914, ILMN_2666061, ILMN_2626653, ILMN_3110425, ILMN_2747677, ILMN_2972392, ILMN_2691345, ILMN_1250929, ILMN_2756460, ILMN_2670415, ILMN_2984012, ILMN_1251771, ILMN_3121891, ILMN_2919263, ILMN_2689259, ILMN_2632073, ILMN_2618461, ILMN_2602406, ILMN_2636384, ILMN_2677170, ILMN_1251572, ILMN_3142224, ILMN_31…	1289	542	12504	1.95085	3.29606e-09	3.29605e-10	9.10287e-09
GOTERM_CC_FAT	GO:0044429~mitochondrial part	101	4.90291	5.03031e-10	ILMN_2733179, ILMN_2841840, ILMN_2639397, ILMN_2720180, ILMN_2621074, ILMN_2962632, ILMN_2688721, ILMN_2648746, ILMN_1213914, ILMN_2666061, ILMN_2626653, ILMN_2747677, ILMN_2691345, ILMN_2857581, ILMN_2756460, ILMN_2984012, ILMN_1251771, ILMN_1231390, ILMN_2919263, ILMN_2679851, ILMN_2689259, ILMN_2632073, ILMN_3146224, ILMN_2618461, ILMN_1249301, ILMN_2602406, ILMN_2636384, ILMN_3142224, ILMN_31…	1289	524	12504	1.86976	2.64091e-07	2.40083e-08	7.29353e-07
GOTERM_CC_FAT	GO:0005740~mitochondrial envelope	77	3.73786	2.92154e-08	ILMN_2657694, ILMN_1240857, ILMN_2973897, ILMN_2668977, ILMN_2960108, ILMN_2639397, ILMN_2720180, ILMN_3010110, ILMN_2962632, ILMN_1213914, ILMN_2972149, ILMN_2666061, ILMN_2717727, ILMN_2626653, ILMN_2747677, ILMN_2588601, ILMN_2691345, ILMN_3003242, ILMN_2512849, ILMN_2912532, ILMN_1218263, ILMN_2756460, ILMN_1234521, ILMN_2984012, ILMN_2842572, ILMN_1251771, ILMN_2892222, ILMN_2919263, ILMN_12…	1289	391	12504	1.91034	1.5338e-05	1.09558e-06	4.23599e-05
GOTERM_CC_FAT	GO:0019866~organelle inner membrane	65	3.15534	4.64003e-08	ILMN_1240857, ILMN_2657694, ILMN_2973897, ILMN_2960108, ILMN_2668977, ILMN_2639397, ILMN_2720180, ILMN_2796651, ILMN_3010110, ILMN_2962632, ILMN_1213914, ILMN_2972149, ILMN_2666061, ILMN_2717727, ILMN_2626653, ILMN_2747677, ILMN_2588601, ILMN_2691345, ILMN_3003242, ILMN_2512849, ILMN_1238081, ILMN_1234521, ILMN_2984012, ILMN_2842572, ILMN_1251771, ILMN_3121891, ILMN_2892222, ILMN_2919263, ILMN_12…	1289	312	12504	2.02095	2.43599e-05	1.62401e-06	6.72766e-05
GOTERM_CC_FAT	GO:0031090~organelle membrane	132	6.40777	5.75397e-08	ILMN_1219978, ILMN_3034877, ILMN_2639397, ILMN_2720180, ILMN_2796651, ILMN_2962632, ILMN_1213914, ILMN_2630767, ILMN_2630768, ILMN_1216919, ILMN_2666061, ILMN_2652187, ILMN_2626653, ILMN_1237323, ILMN_2747677, ILMN_2972392, ILMN_2691345, ILMN_2756460, ILMN_1244297, ILMN_2984012, ILMN_2718090, ILMN_1251771, ILMN_2919263, ILMN_3121891, ILMN_2689259, ILMN_2632073, ILMN_2618461, ILMN_2602406, ILMN_26…	1289	809	12504	1.58278	3.02079e-05	1.88802e-06	8.34278e-05
GOTERM_CC_FAT	GO:0031966~mitochondrial membrane	71	3.4466	2.46092e-07	ILMN_1240857, ILMN_2657694, ILMN_2973897, ILMN_2960108, ILMN_2668977, ILMN_2639397, ILMN_2720180, ILMN_3010110, ILMN_2962632, ILMN_1213914, ILMN_2972149, ILMN_2666061, ILMN_2717727, ILMN_2626653, ILMN_2747677, ILMN_2588601, ILMN_2691345, ILMN_3003242, ILMN_2512849, ILMN_2756460, ILMN_1234521, ILMN_2984012, ILMN_2842572, ILMN_1251771, ILMN_2892222, ILMN_2919263, ILMN_1254971, ILMN_2689259, ILMN_26…	1289	368	12504	1.87157	0.00012919	6.79989e-06	0.000356813
GOTERM_CC_FAT	GO:0005743~mitochondrial inner membrane	60	2.91262	4.36665e-07	ILMN_1240857, ILMN_2657694, ILMN_2973897, ILMN_2960108, ILMN_2668977, ILMN_2639397, ILMN_2720180, ILMN_3010110, ILMN_2962632, ILMN_1213914, ILMN_2972149, ILMN_2666061, ILMN_2717727, ILMN_2626653, ILMN_2747677, ILMN_2588601, ILMN_2691345, ILMN_3003242, ILMN_2512849, ILMN_1234521, ILMN_2984012, ILMN_2842572, ILMN_1251771, ILMN_2892222, ILMN_2919263, ILMN_1254971, ILMN_2632073, ILMN_1242903, ILMN_31…	1289	296	12504	1.96633	0.000229223	1.14624e-05	0.000633127
SP_PIR_KEYWORDS	mitochondrion inner membrane	35	1.69903	0.00135256	ILMN_1240857, ILMN_2973897, ILMN_2826816, ILMN_1229238, ILMN_2668977, ILMN_2598972, ILMN_2696610, ILMN_3010110, ILMN_2962632, ILMN_1213914, ILMN_2666061, ILMN_2626653, ILMN_2747677, ILMN_2588601, ILMN_3003242, ILMN_2691345, ILMN_2512849, ILMN_2792560, ILMN_1224781, ILMN_1234521, ILMN_2594149, ILMN_2842572, ILMN_1229975, ILMN_2675672, ILMN_1251771, ILMN_2638875, ILMN_1216007, ILMN_2734283, ILMN_12…	1951	183	17854	1.75023	0.491039	0.0152324	1.92965
KEGG_PATHWAY	mmu00190:Oxidative phosphorylation	25	1.21359	0.00876577	ILMN_1240857, ILMN_2657694, ILMN_2973897, ILMN_2616405, ILMN_2668977, ILMN_2598972, ILMN_2962632, ILMN_1213914, ILMN_2666061, ILMN_2588601, ILMN_2512849, ILMN_2792560, ILMN_1224781, ILMN_1234521, ILMN_2594149, ILMN_2842572, ILMN_1251771, ILMN_1229975, ILMN_2638875, ILMN_1254971, ILMN_1216007, ILMN_1235186, ILMN_2691528, ILMN_1228796, ILMN_2636384, ILMN_1243149, ILMN_3142224	643	130	5738	1.71611	0.791368	0.0719112	10.2593
Annotation Cluster 6	Enrichment Score: 7.85780087875481
Category	Term	Count	%	PValue	Genes	List Total	Pop Hits	Pop Total	Fold Enrichment	Bonferroni	Benjamini	FDR
GOTERM_MF_FAT	GO:0000166~nucleotide binding	326	15.8252	4.78281e-13	ILMN_1234672, ILMN_3034877, ILMN_2685157, ILMN_1255201, ILMN_2697652, ILMN_2681776, ILMN_2691345, ILMN_3021465, ILMN_2420070, ILMN_2756460, ILMN_3142235, ILMN_2723920, ILMN_2971744, ILMN_1249708, ILMN_2689259, ILMN_1223624, ILMN_2709456, ILMN_3146224, ILMN_1249301, ILMN_1219459, ILMN_2688923, ILMN_2768805, ILMN_2937738, ILMN_1222803, ILMN_1238520, ILMN_2937735, ILMN_2737982, ILMN_2977129, ILMN_29…	1385	2183	13288	1.43276	5.14634e-10	5.14634e-10	7.62723e-10
GOTERM_MF_FAT	GO:0032555~purine ribonucleotide binding	267	12.9612	2.22478e-10	ILMN_1234672, ILMN_3034877, ILMN_2685157, ILMN_2724386, ILMN_1213055, ILMN_1221363, ILMN_3161897, ILMN_2648746, ILMN_2697652, ILMN_1257208, ILMN_2681776, ILMN_2868482, ILMN_2696270, ILMN_2691345, ILMN_3021465, ILMN_2420070, ILMN_2756460, ILMN_2705227, ILMN_2773302, ILMN_1259356, ILMN_2677379, ILMN_2695158, ILMN_2723920, ILMN_3154810, ILMN_3004142, ILMN_1249708, ILMN_1259148, ILMN_1251876, ILMN_26…	1385	1796	13288	1.42631	2.39386e-07	1.19693e-07	3.54789e-07
GOTERM_MF_FAT	GO:0032553~ribonucleotide binding	267	12.9612	2.22478e-10	ILMN_1234672, ILMN_3034877, ILMN_2685157, ILMN_2724386, ILMN_1213055, ILMN_1221363, ILMN_3161897, ILMN_2648746, ILMN_2697652, ILMN_1257208, ILMN_2681776, ILMN_2868482, ILMN_2696270, ILMN_2691345, ILMN_3021465, ILMN_2420070, ILMN_2756460, ILMN_2705227, ILMN_2773302, ILMN_1259356, ILMN_2677379, ILMN_2695158, ILMN_2723920, ILMN_3154810, ILMN_3004142, ILMN_1249708, ILMN_1259148, ILMN_1251876, ILMN_26…	1385	1796	13288	1.42631	2.39386e-07	1.19693e-07	3.54789e-07
GOTERM_MF_FAT	GO:0017076~purine nucleotide binding	275	13.3495	3.73566e-10	ILMN_1234672, ILMN_2685157, ILMN_3034877, ILMN_2724386, ILMN_1213055, ILMN_1221363, ILMN_3161897, ILMN_2648746, ILMN_2697652, ILMN_1257208, ILMN_2681776, ILMN_2868482, ILMN_2696270, ILMN_2691345, ILMN_3021465, ILMN_2420070, ILMN_2756460, ILMN_2705227, ILMN_2773302, ILMN_1259356, ILMN_2677379, ILMN_3154810, ILMN_2695158, ILMN_2723920, ILMN_3004142, ILMN_1249708, ILMN_1259148, ILMN_1251876, ILMN_26…	1385	1871	13288	1.41016	4.01957e-07	1.33986e-07	5.95732e-07
SP_PIR_KEYWORDS	nucleotide-binding	254	12.3301	1.70645e-09	ILMN_1234672, ILMN_3034877, ILMN_2685157, ILMN_2724386, ILMN_1213055, ILMN_1221363, ILMN_3161897, ILMN_2648746, ILMN_2697652, ILMN_1257208, ILMN_2681776, ILMN_2868482, ILMN_2696270, ILMN_2691345, ILMN_3021465, ILMN_2420070, ILMN_2756460, ILMN_2705227, ILMN_2773302, ILMN_1259356, ILMN_2677379, ILMN_2695158, ILMN_2723920, ILMN_3154810, ILMN_3004142, ILMN_1249708, ILMN_1259148, ILMN_1251876, ILMN_26…	1951	1631	17854	1.42514	8.51517e-07	7.74106e-08	2.45666e-06
GOTERM_MF_FAT	GO:0005524~ATP binding	219	10.6311	2.46603e-09	ILMN_1234672, ILMN_3034877, ILMN_2685157, ILMN_2724386, ILMN_1213055, ILMN_1221363, ILMN_3161897, ILMN_2648746, ILMN_2697652, ILMN_1257208, ILMN_2681776, ILMN_2868482, ILMN_2696270, ILMN_2691345, ILMN_3021465, ILMN_2756460, ILMN_2705227, ILMN_1259356, ILMN_2677379, ILMN_2695158, ILMN_2723920, ILMN_3154810, ILMN_3004142, ILMN_1249708, ILMN_1251876, ILMN_2689259, ILMN_2512043, ILMN_1247317, ILMN_31…	1385	1443	13288	1.45609	2.65345e-06	5.3069e-07	3.93263e-06
GOTERM_MF_FAT	GO:0032559~adenyl ribonucleotide binding	220	10.6796	4.2672e-09	ILMN_1234672, ILMN_3034877, ILMN_2685157, ILMN_2724386, ILMN_1213055, ILMN_1221363, ILMN_3161897, ILMN_2648746, ILMN_2697652, ILMN_1257208, ILMN_2681776, ILMN_2868482, ILMN_2696270, ILMN_2691345, ILMN_3021465, ILMN_2756460, ILMN_2705227, ILMN_1259356, ILMN_2677379, ILMN_2695158, ILMN_2723920, ILMN_3154810, ILMN_3004142, ILMN_1249708, ILMN_1251876, ILMN_2689259, ILMN_2512043, ILMN_1247317, ILMN_31…	1385	1460	13288	1.4457	4.59149e-06	7.6525e-07	6.80498e-06
GOTERM_MF_FAT	GO:0030554~adenyl nucleotide binding	228	11.068	7.48467e-09	ILMN_1234672, ILMN_3034877, ILMN_2685157, ILMN_2724386, ILMN_1213055, ILMN_1221363, ILMN_3161897, ILMN_2648746, ILMN_2697652, ILMN_1257208, ILMN_2681776, ILMN_2868482, ILMN_2696270, ILMN_2691345, ILMN_3021465, ILMN_2756460, ILMN_2705227, ILMN_1259356, ILMN_2677379, ILMN_2695158, ILMN_2723920, ILMN_3154810, ILMN_3004142, ILMN_1249708, ILMN_1251876, ILMN_2689259, ILMN_2512043, ILMN_1247317, ILMN_31…	1385	1535	13288	1.42507	8.05347e-06	1.1505e-06	1.19359e-05
GOTERM_MF_FAT	GO:0001883~purine nucleoside binding	228	11.068	1.57402e-08	ILMN_1234672, ILMN_3034877, ILMN_2685157, ILMN_2724386, ILMN_1213055, ILMN_1221363, ILMN_3161897, ILMN_2648746, ILMN_2697652, ILMN_1257208, ILMN_2681776, ILMN_2868482, ILMN_2696270, ILMN_2691345, ILMN_3021465, ILMN_2756460, ILMN_2705227, ILMN_1259356, ILMN_2677379, ILMN_2695158, ILMN_2723920, ILMN_3154810, ILMN_3004142, ILMN_1249708, ILMN_1251876, ILMN_2689259, ILMN_2512043, ILMN_1247317, ILMN_31…	1385	1548	13288	1.4131	1.69363e-05	2.11705e-06	2.51012e-05
GOTERM_MF_FAT	GO:0001882~nucleoside binding	228	11.068	2.69675e-08	ILMN_1234672, ILMN_3034877, ILMN_2685157, ILMN_2724386, ILMN_1213055, ILMN_1221363, ILMN_3161897, ILMN_2648746, ILMN_2697652, ILMN_1257208, ILMN_2681776, ILMN_2868482, ILMN_2696270, ILMN_2691345, ILMN_3021465, ILMN_2756460, ILMN_2705227, ILMN_1259356, ILMN_2677379, ILMN_2695158, ILMN_2723920, ILMN_3154810, ILMN_3004142, ILMN_1249708, ILMN_1251876, ILMN_2689259, ILMN_2512043, ILMN_1247317, ILMN_31…	1385	1558	13288	1.40403	2.90166e-05	3.22411e-06	4.30056e-05
SP_PIR_KEYWORDS	atp-binding	203	9.85437	3.70133e-08	ILMN_1234672, ILMN_3034877, ILMN_2685157, ILMN_2724386, ILMN_1213055, ILMN_1221363, ILMN_3161897, ILMN_2648746, ILMN_2697652, ILMN_1257208, ILMN_2681776, ILMN_2868482, ILMN_2696270, ILMN_2691345, ILMN_3021465, ILMN_2756460, ILMN_2705227, ILMN_1259356, ILMN_2677379, ILMN_2723920, ILMN_2695158, ILMN_3154810, ILMN_3004142, ILMN_1249708, ILMN_1251876, ILMN_2512043, ILMN_2689259, ILMN_1247317, ILMN_31…	1951	1287	17854	1.44343	1.84695e-05	1.42074e-06	5.32857e-05
SP_PIR_KEYWORDS	kinase	107	5.19417	0.000421557	ILMN_2683933, ILMN_1213055, ILMN_2971845, ILMN_3028981, ILMN_2648746, ILMN_2928560, ILMN_1257208, ILMN_2681776, ILMN_2696270, ILMN_2594477, ILMN_2868482, ILMN_1235481, ILMN_3122081, ILMN_1214631, ILMN_2756460, ILMN_2705227, ILMN_2842137, ILMN_1259356, ILMN_2742675, ILMN_2723920, ILMN_2712697, ILMN_3004142, ILMN_2833378, ILMN_2689259, ILMN_1251876, ILMN_2833376, ILMN_2589556, ILMN_3125920, ILMN_28…	1951	707	17854	1.38498	0.189741	0.00567039	0.605178
UP_SEQ_FEATURE	nucleotide phosphate-binding region:ATP	124	6.01942	0.0896384	ILMN_2683933, ILMN_1234672, ILMN_3034877, ILMN_1213055, ILMN_1221363, ILMN_3161897, ILMN_2971845, ILMN_3028981, ILMN_2928560, ILMN_2697652, ILMN_1257208, ILMN_2681776, ILMN_3110425, ILMN_2594477, ILMN_2696270, ILMN_2691345, ILMN_3021465, ILMN_3122081, ILMN_2705227, ILMN_2842137, ILMN_1259356, ILMN_2742675, ILMN_2723920, ILMN_3154810, ILMN_2695158, ILMN_3004142, ILMN_1249708, ILMN_2833378, ILMN_27…	1937	907	16021	1.13077	1	0.998703	82.5682
Annotation Cluster 7	Enrichment Score: 7.485753206258674
Category	Term	Count	%	PValue	Genes	List Total	Pop Hits	Pop Total	Fold Enrichment	Bonferroni	Benjamini	FDR
SP_PIR_KEYWORDS	mitochondrion	152	7.37864	2.43756e-12	ILMN_3034877, ILMN_2733179, ILMN_2750314, ILMN_2841840, ILMN_1241035, ILMN_1234901, ILMN_2720180, ILMN_2621074, ILMN_2688721, ILMN_2962632, ILMN_1213914, ILMN_2648746, ILMN_2666061, ILMN_2626653, ILMN_2747677, ILMN_2972392, ILMN_2691345, ILMN_2857581, ILMN_2727992, ILMN_2756460, ILMN_2647156, ILMN_2619671, ILMN_2984012, ILMN_2746906, ILMN_3163347, ILMN_1251771, ILMN_2646556, ILMN_1231390, ILMN_26…	1951	790	17854	1.76074	1.21637e-09	1.73766e-10	3.50927e-09
SP_PIR_KEYWORDS	transit peptide	86	4.17476	5.64331e-07	ILMN_2657694, ILMN_1240857, ILMN_1220276, ILMN_2679770, ILMN_2733179, ILMN_1241035, ILMN_2960108, ILMN_2668977, ILMN_1234901, ILMN_2621074, ILMN_2755915, ILMN_2962632, ILMN_2688721, ILMN_2648580, ILMN_1226334, ILMN_2648746, ILMN_2747677, ILMN_2857581, ILMN_2727992, ILMN_2512849, ILMN_2912532, ILMN_2760514, ILMN_2647156, ILMN_2997022, ILMN_1234521, ILMN_2984012, ILMN_2619671, ILMN_2746906, ILMN_28…	1951	457	17854	1.72211	0.000281562	1.408e-05	0.000812429
UP_SEQ_FEATURE	transit peptide:Mitochondrion	85	4.12621	2.5366e-05	ILMN_2657694, ILMN_1240857, ILMN_1220276, ILMN_2679770, ILMN_2733179, ILMN_1241035, ILMN_2960108, ILMN_2668977, ILMN_1234901, ILMN_2621074, ILMN_2755915, ILMN_2962632, ILMN_2688721, ILMN_2648580, ILMN_1226334, ILMN_2648746, ILMN_2747677, ILMN_2857581, ILMN_2727992, ILMN_2512849, ILMN_2912532, ILMN_2647156, ILMN_2997022, ILMN_1234521, ILMN_2984012, ILMN_2619671, ILMN_2746906, ILMN_2842572, ILMN_12…	1937	449	16021	1.56579	0.0972891	0.0972891	0.0471725
Annotation Cluster 8	Enrichment Score: 6.6351482467769385
Category	Term	Count	%	PValue	Genes	List Total	Pop Hits	Pop Total	Fold Enrichment	Bonferroni	Benjamini	FDR
GOTERM_CC_FAT	GO:0030529~ribonucleoprotein complex	104	5.04854	1.25803e-14	ILMN_2688863, ILMN_2659132, ILMN_2748091, ILMN_2841840, ILMN_2970691, ILMN_1256671, ILMN_2893077, ILMN_2783429, ILMN_2727992, ILMN_2828838, ILMN_2972325, ILMN_2920800, ILMN_2934534, ILMN_2600627, ILMN_3142235, ILMN_2967528, ILMN_2971946, ILMN_2619671, ILMN_2741726, ILMN_2970685, ILMN_2631813, ILMN_1231390, ILMN_3102072, ILMN_2904641, ILMN_2930364, ILMN_2895293, ILMN_2740053, ILMN_1249986, ILMN_12…	1289	462	12504	2.18367	6.5864e-12	8.23341e-13	1.81855e-11
GOTERM_BP_FAT	GO:0006412~translation	75	3.64078	6.67451e-11	ILMN_2828687, ILMN_2688863, ILMN_2715215, ILMN_2679770, ILMN_1253012, ILMN_2841840, ILMN_2982192, ILMN_2659229, ILMN_2606848, ILMN_2678828, ILMN_2995755, ILMN_2755915, ILMN_2688721, ILMN_2712642, ILMN_1226334, ILMN_2871412, ILMN_2642063, ILMN_2893077, ILMN_1236631, ILMN_1377920, ILMN_1214450, ILMN_2857581, ILMN_2999797, ILMN_2749382, ILMN_2924030, ILMN_2647156, ILMN_2967528, ILMN_1254157, ILMN_26…	1454	319	13588	2.19716	2.15787e-07	1.54133e-08	1.21187e-07
SP_PIR_KEYWORDS	ribonucleoprotein	60	2.91262	7.66746e-08	ILMN_2975640, ILMN_2688863, ILMN_2659132, ILMN_2679770, ILMN_2720334, ILMN_2748091, ILMN_2841840, ILMN_2982192, ILMN_1256671, ILMN_2659229, ILMN_2599897, ILMN_2712642, ILMN_1226334, ILMN_1236631, ILMN_2893077, ILMN_2727992, ILMN_2999797, ILMN_2971946, ILMN_2967528, ILMN_2619671, ILMN_2741726, ILMN_2627690, ILMN_1231390, ILMN_3135931, ILMN_2822621, ILMN_2904641, ILMN_2633805, ILMN_2829171, ILMN_26…	1951	266	17854	2.06418	3.82599e-05	2.55071e-06	0.000110383
GOTERM_CC_FAT	GO:0005840~ribosome	45	2.18447	2.44187e-07	ILMN_2688863, ILMN_2679770, ILMN_2841840, ILMN_2982192, ILMN_2659229, ILMN_2712642, ILMN_2893077, ILMN_1236631, ILMN_1226334, ILMN_2727992, ILMN_2999797, ILMN_2967528, ILMN_2619671, ILMN_1231390, ILMN_2605096, ILMN_2605094, ILMN_3135931, ILMN_2904641, ILMN_2822621, ILMN_2633805, ILMN_2655774, ILMN_1216122, ILMN_2790113, ILMN_2956159, ILMN_2964873, ILMN_2948712, ILMN_2663679, ILMN_3006534, ILMN_26…	1289	192	12504	2.27356	0.00012819	7.1221e-06	0.00035405
GOTERM_MF_FAT	GO:0003735~structural constituent of ribosome	37	1.79612	1.44866e-06	ILMN_2964873, ILMN_2688863, ILMN_2679770, ILMN_2663679, ILMN_2841840, ILMN_2982192, ILMN_2645772, ILMN_3006534, ILMN_2842366, ILMN_2659229, ILMN_2883147, ILMN_2712642, ILMN_2786708, ILMN_1226334, ILMN_2893077, ILMN_1236631, ILMN_2948086, ILMN_2620695, ILMN_1239113, ILMN_1260262, ILMN_2594971, ILMN_2999797, ILMN_2967528, ILMN_2619671, ILMN_2643264, ILMN_1231390, ILMN_2605096, ILMN_2851231, ILMN_12…	1385	151	13288	2.3509	0.00155755	0.000155864	0.00231018
SP_PIR_KEYWORDS	ribosomal protein	42	2.03883	2.24671e-06	ILMN_2964873, ILMN_2688863, ILMN_2679770, ILMN_2663679, ILMN_2841840, ILMN_2982192, ILMN_2645772, ILMN_2842366, ILMN_2659229, ILMN_2883147, ILMN_2712642, ILMN_2786708, ILMN_1226334, ILMN_2609087, ILMN_2893077, ILMN_1236631, ILMN_2948086, ILMN_2664049, ILMN_2620695, ILMN_2829295, ILMN_1239113, ILMN_1260262, ILMN_2727992, ILMN_2594971, ILMN_2753924, ILMN_2999797, ILMN_2967528, ILMN_2619671, ILMN_26…	1951	177	17854	2.17147	0.00112048	5.09581e-05	0.00323439
GOTERM_MF_FAT	GO:0005198~structural molecule activity	64	3.1068	0.00886828	ILMN_2688863, ILMN_2679770, ILMN_2914510, ILMN_2841840, ILMN_2982192, ILMN_2659229, ILMN_1214394, ILMN_2712642, ILMN_1226334, ILMN_2630767, ILMN_1236631, ILMN_2893077, ILMN_2630768, ILMN_3123303, ILMN_2420070, ILMN_2999797, ILMN_2967528, ILMN_2619671, ILMN_2588051, ILMN_2870295, ILMN_1231390, ILMN_3121891, ILMN_2605096, ILMN_2605094, ILMN_3135931, ILMN_2822621, ILMN_2904641, ILMN_1216122, ILMN_27…	1385	450	13288	1.36451	0.999931	0.217894	13.2426
KEGG_PATHWAY	mmu03010:Ribosome	18	0.873786	0.0182801	ILMN_2964873, ILMN_2688863, ILMN_2851231, ILMN_2982192, ILMN_3006534, ILMN_3135931, ILMN_2659229, ILMN_2904641, ILMN_2712642, ILMN_2893077, ILMN_1236631, ILMN_2948086, ILMN_1222250, ILMN_2620695, ILMN_3126986, ILMN_3046846, ILMN_2594971, ILMN_2999797, ILMN_2956159, ILMN_2967528	643	89	5738	1.80481	0.962521	0.103687	20.2939
Annotation Cluster 9	Enrichment Score: 5.929994997311209
Category	Term	Count	%	PValue	Genes	List Total	Pop Hits	Pop Total	Fold Enrichment	Bonferroni	Benjamini	FDR
GOTERM_BP_FAT	GO:0006915~apoptosis	87	4.2233	2.20817e-07	ILMN_2659132, ILMN_2825020, ILMN_2705802, ILMN_2718815, ILMN_2472444, ILMN_2851288, ILMN_2592476, ILMN_2893077, ILMN_1254154, ILMN_1221199, ILMN_2729718, ILMN_1245609, ILMN_2705227, ILMN_2648548, ILMN_2742675, ILMN_3004142, ILMN_2864906, ILMN_3106819, ILMN_2692110, ILMN_2995129, ILMN_2964608, ILMN_2697248, ILMN_1216394, ILMN_2937738, ILMN_2493874, ILMN_2937735, ILMN_2745993, ILMN_1244330, ILMN_29…	1454	465	13588	1.74847	0.000713647	3.39947e-05	0.000400931
GOTERM_BP_FAT	GO:0012501~programmed cell death	88	4.27184	2.40866e-07	ILMN_2659132, ILMN_2825020, ILMN_2705802, ILMN_2718815, ILMN_2472444, ILMN_2851288, ILMN_2592476, ILMN_2893077, ILMN_1254154, ILMN_1221199, ILMN_2729718, ILMN_1245609, ILMN_2705227, ILMN_2648548, ILMN_2742675, ILMN_3004142, ILMN_2864906, ILMN_3106819, ILMN_2692110, ILMN_2995129, ILMN_2964608, ILMN_2697248, ILMN_1216394, ILMN_2937738, ILMN_2493874, ILMN_2937735, ILMN_2745993, ILMN_1244330, ILMN_29…	1454	473	13588	1.73865	0.000778417	3.53957e-05	0.000437333
GOTERM_BP_FAT	GO:0016265~death	93	4.51456	6.05189e-07	ILMN_2659132, ILMN_2825020, ILMN_2740852, ILMN_2705802, ILMN_2718815, ILMN_2472444, ILMN_2851288, ILMN_2592476, ILMN_2893077, ILMN_1254154, ILMN_1221199, ILMN_1245609, ILMN_2729718, ILMN_2705227, ILMN_2648548, ILMN_2742675, ILMN_3004142, ILMN_2864906, ILMN_3106819, ILMN_2692110, ILMN_2995129, ILMN_2964608, ILMN_2697248, ILMN_1216394, ILMN_2937738, ILMN_2493874, ILMN_2937735, ILMN_2690506, ILMN_27…	1454	519	13588	1.67458	0.00195466	8.5065e-05	0.00109882
GOTERM_BP_FAT	GO:0008219~cell death	90	4.36893	1.3973e-06	ILMN_2659132, ILMN_2825020, ILMN_2705802, ILMN_2718815, ILMN_2472444, ILMN_2851288, ILMN_2592476, ILMN_2893077, ILMN_1254154, ILMN_1221199, ILMN_2729718, ILMN_1245609, ILMN_2705227, ILMN_2648548, ILMN_2742675, ILMN_3004142, ILMN_2864906, ILMN_3106819, ILMN_2692110, ILMN_2995129, ILMN_2964608, ILMN_2697248, ILMN_1216394, ILMN_2937738, ILMN_2493874, ILMN_2937735, ILMN_2690506, ILMN_2745993, ILMN_12…	1454	507	13588	1.65892	0.0045073	0.000161326	0.00253702
SP_PIR_KEYWORDS	Apoptosis	62	3.00971	4.97777e-05	ILMN_2681221, ILMN_2936380, ILMN_2516266, ILMN_2659132, ILMN_2825020, ILMN_2645074, ILMN_2705324, ILMN_2669333, ILMN_2705802, ILMN_2718815, ILMN_2472444, ILMN_2942492, ILMN_2592476, ILMN_2851288, ILMN_2638721, ILMN_1221199, ILMN_2980044, ILMN_1245609, ILMN_2729718, ILMN_2705227, ILMN_2648548, ILMN_2742675, ILMN_3150536, ILMN_2466845, ILMN_2753492, ILMN_3004142, ILMN_2964511, ILMN_2850527, ILMN_29…	1951	337	17854	1.6836	0.0245337	0.000827646	0.0716378
Annotation Cluster 10	Enrichment Score: 5.784223848947853
Category	Term	Count	%	PValue	Genes	List Total	Pop Hits	Pop Total	Fold Enrichment	Bonferroni	Benjamini	FDR
GOTERM_CC_FAT	GO:0043228~non-membrane-bounded organelle	273	13.2524	3.31349e-09	ILMN_2828492, ILMN_2851889, ILMN_3034877, ILMN_2851888, ILMN_3055904, ILMN_2841840, ILMN_1232386, ILMN_2666669, ILMN_2847332, ILMN_3161897, ILMN_2633333, ILMN_2893077, ILMN_2697652, ILMN_2699989, ILMN_2829646, ILMN_2999642, ILMN_2883414, ILMN_2710604, ILMN_3085841, ILMN_3021465, ILMN_2727992, ILMN_2420070, ILMN_1244296, ILMN_2600627, ILMN_2995290, ILMN_2619671, ILMN_2683190, ILMN_2957589, ILMN_26…	1289	1919	12504	1.38001	1.73958e-06	1.44965e-07	4.80428e-06
GOTERM_CC_FAT	GO:0043232~intracellular non-membrane-bounded organelle	273	13.2524	3.31349e-09	ILMN_2828492, ILMN_2851889, ILMN_3034877, ILMN_2851888, ILMN_3055904, ILMN_2841840, ILMN_1232386, ILMN_2666669, ILMN_2847332, ILMN_3161897, ILMN_2633333, ILMN_2893077, ILMN_2697652, ILMN_2699989, ILMN_2829646, ILMN_2999642, ILMN_2883414, ILMN_2710604, ILMN_3085841, ILMN_3021465, ILMN_2727992, ILMN_2420070, ILMN_1244296, ILMN_2600627, ILMN_2995290, ILMN_2619671, ILMN_2683190, ILMN_2957589, ILMN_26…	1289	1919	12504	1.38001	1.73958e-06	1.44965e-07	4.80428e-06
GOTERM_CC_FAT	GO:0005856~cytoskeleton	119	5.7767	0.40435	ILMN_2921526, ILMN_2828492, ILMN_2825020, ILMN_3034877, ILMN_2914510, ILMN_2666669, ILMN_2847332, ILMN_3161897, ILMN_1214394, ILMN_2829646, ILMN_1377923, ILMN_3110425, ILMN_1216871, ILMN_3085841, ILMN_2710604, ILMN_2420070, ILMN_2995290, ILMN_2742675, ILMN_2667889, ILMN_2588051, ILMN_2695158, ILMN_2735625, ILMN_3121891, ILMN_2669189, ILMN_1215550, ILMN_3125920, ILMN_2669087, ILMN_2672767, ILMN_27…	1289	1122	12504	1.02885	1	0.840843	99.9454
Annotation Cluster 11	Enrichment Score: 5.577352400403907
Category	Term	Count	%	PValue	Genes	List Total	Pop Hits	Pop Total	Fold Enrichment	Bonferroni	Benjamini	FDR
GOTERM_BP_FAT	GO:0034660~ncRNA metabolic process	51	2.47573	8.85318e-09	ILMN_2828687, ILMN_2720334, ILMN_2606848, ILMN_1218584, ILMN_2688721, ILMN_2712642, ILMN_2871412, ILMN_2893077, ILMN_2857581, ILMN_2749382, ILMN_1249624, ILMN_1254157, ILMN_1254444, ILMN_2439341, ILMN_2965417, ILMN_2859678, ILMN_1249116, ILMN_3146224, ILMN_1242419, ILMN_2835012, ILMN_1251534, ILMN_3003567, ILMN_1251056, ILMN_2737092, ILMN_1237234, ILMN_3139479, ILMN_1232428, ILMN_2705969, ILMN_29…	1454	202	13588	2.35945	2.86219e-05	1.7889e-06	1.60745e-05
GOTERM_BP_FAT	GO:0006399~tRNA metabolic process	33	1.60194	1.58878e-07	ILMN_3139479, ILMN_2828687, ILMN_1232428, ILMN_2705969, ILMN_2606848, ILMN_2591217, ILMN_2979430, ILMN_1258042, ILMN_3156343, ILMN_1218584, ILMN_2688721, ILMN_2871412, ILMN_2628175, ILMN_2857581, ILMN_2749382, ILMN_1254157, ILMN_1254444, ILMN_2729008, ILMN_2907642, ILMN_2928160, ILMN_3102333, ILMN_2589477, ILMN_2439341, ILMN_2591823, ILMN_2859678, ILMN_3146224, ILMN_2810045, ILMN_2835012, ILMN_27…	1454	113	13588	2.72915	0.000513521	2.56823e-05	0.00028847
GOTERM_BP_FAT	GO:0034470~ncRNA processing	38	1.84466	3.09729e-06	ILMN_3139479, ILMN_1232428, ILMN_2705969, ILMN_2720334, ILMN_2979430, ILMN_2678269, ILMN_1258042, ILMN_1218584, ILMN_2522765, ILMN_3020829, ILMN_2712642, ILMN_2711570, ILMN_2893077, ILMN_2628175, ILMN_2688383, ILMN_1249624, ILMN_2952587, ILMN_1225615, ILMN_2616786, ILMN_1254444, ILMN_2729008, ILMN_1224534, ILMN_2591823, ILMN_2859678, ILMN_2965417, ILMN_2715289, ILMN_1249116, ILMN_1242239, ILMN_12…	1454	158	13588	2.24759	0.00996359	0.000322966	0.00562352
GOTERM_BP_FAT	GO:0008033~tRNA processing	20	0.970874	9.61057e-05	ILMN_3139479, ILMN_1254444, ILMN_1232428, ILMN_2729008, ILMN_2705969, ILMN_2979430, ILMN_2859678, ILMN_2591823, ILMN_1258042, ILMN_1218584, ILMN_2835012, ILMN_2628175, ILMN_1251534, ILMN_2719460, ILMN_2920309, ILMN_1251056, ILMN_2751247, ILMN_1240735, ILMN_1215147, ILMN_2619362	1454	70	13588	2.67007	0.267084	0.00645252	0.174353
SP_PIR_KEYWORDS	trna processing	18	0.873786	0.000309986	ILMN_1254444, ILMN_1232428, ILMN_2729008, ILMN_2705969, ILMN_2979430, ILMN_2859678, ILMN_2591823, ILMN_1258042, ILMN_1218584, ILMN_2835012, ILMN_2628175, ILMN_1251534, ILMN_2719460, ILMN_2920309, ILMN_1251056, ILMN_2751247, ILMN_1240735, ILMN_2619362	1951	63	17854	2.61463	0.143334	0.00453988	0.445342
Annotation Cluster 12	Enrichment Score: 4.962098194600535
Category	Term	Count	%	PValue	Genes	List Total	Pop Hits	Pop Total	Fold Enrichment	Bonferroni	Benjamini	FDR
GOTERM_BP_FAT	GO:0051028~mRNA transport	22	1.06796	8.64658e-07	ILMN_3162184, ILMN_2709901, ILMN_2678828, ILMN_3024099, ILMN_2999007, ILMN_1220943, ILMN_2850527, ILMN_2748839, ILMN_3110425, ILMN_2872537, ILMN_1223793, ILMN_3003567, ILMN_2686044, ILMN_3034381, ILMN_1250929, ILMN_2890574, ILMN_2845214, ILMN_1251572, ILMN_3114413, ILMN_2698282, ILMN_3108109, ILMN_1250574, ILMN_2654013, ILMN_2679755	1454	62	13588	3.31606	0.00279154	0.000107511	0.00156992
GOTERM_BP_FAT	GO:0050658~RNA transport	22	1.06796	2.7462e-06	ILMN_3162184, ILMN_2709901, ILMN_2678828, ILMN_3024099, ILMN_2999007, ILMN_1220943, ILMN_2850527, ILMN_2748839, ILMN_3110425, ILMN_2872537, ILMN_1223793, ILMN_3003567, ILMN_2686044, ILMN_3034381, ILMN_1250929, ILMN_2890574, ILMN_2845214, ILMN_1251572, ILMN_3114413, ILMN_2698282, ILMN_3108109, ILMN_1250574, ILMN_2654013, ILMN_2679755	1454	66	13588	3.11508	0.00883919	0.000295906	0.00498608
GOTERM_BP_FAT	GO:0050657~nucleic acid transport	22	1.06796	2.7462e-06	ILMN_3162184, ILMN_2709901, ILMN_2678828, ILMN_3024099, ILMN_2999007, ILMN_1220943, ILMN_2850527, ILMN_2748839, ILMN_3110425, ILMN_2872537, ILMN_1223793, ILMN_3003567, ILMN_2686044, ILMN_3034381, ILMN_1250929, ILMN_2890574, ILMN_2845214, ILMN_1251572, ILMN_3114413, ILMN_2698282, ILMN_3108109, ILMN_1250574, ILMN_2654013, ILMN_2679755	1454	66	13588	3.11508	0.00883919	0.000295906	0.00498608
GOTERM_BP_FAT	GO:0051236~establishment of RNA localization	22	1.06796	2.7462e-06	ILMN_3162184, ILMN_2709901, ILMN_2678828, ILMN_3024099, ILMN_2999007, ILMN_1220943, ILMN_2850527, ILMN_2748839, ILMN_3110425, ILMN_2872537, ILMN_1223793, ILMN_3003567, ILMN_2686044, ILMN_3034381, ILMN_1250929, ILMN_2890574, ILMN_2845214, ILMN_1251572, ILMN_3114413, ILMN_2698282, ILMN_3108109, ILMN_1250574, ILMN_2654013, ILMN_2679755	1454	66	13588	3.11508	0.00883919	0.000295906	0.00498608
GOTERM_BP_FAT	GO:0006403~RNA localization	22	1.06796	3.60087e-06	ILMN_3162184, ILMN_2709901, ILMN_2678828, ILMN_3024099, ILMN_2999007, ILMN_1220943, ILMN_2850527, ILMN_2748839, ILMN_3110425, ILMN_2872537, ILMN_1223793, ILMN_3003567, ILMN_2686044, ILMN_3034381, ILMN_1250929, ILMN_2890574, ILMN_2845214, ILMN_1251572, ILMN_3114413, ILMN_2698282, ILMN_3108109, ILMN_1250574, ILMN_2654013, ILMN_2679755	1454	67	13588	3.06859	0.0115741	0.000363735	0.00653779
SP_PIR_KEYWORDS	translocation	21	1.01942	1.16705e-05	ILMN_2624695, ILMN_2709901, ILMN_2678828, ILMN_3024099, ILMN_3162476, ILMN_2805945, ILMN_2597686, ILMN_1220943, ILMN_2618461, ILMN_2748839, ILMN_2626653, ILMN_3110425, ILMN_2872537, ILMN_2686044, ILMN_1244414, ILMN_3034381, ILMN_1250929, ILMN_2890574, ILMN_1251572, ILMN_3108109, ILMN_2732877, ILMN_1250574, ILMN_2654013	1951	65	17854	2.95654	0.0058067	0.000242621	0.0168
SP_PIR_KEYWORDS	mRNA transport	20	0.970874	1.21045e-05	ILMN_3162184, ILMN_2709901, ILMN_2678828, ILMN_3024099, ILMN_2999007, ILMN_1220943, ILMN_2850527, ILMN_2748839, ILMN_3110425, ILMN_2872537, ILMN_3003567, ILMN_2686044, ILMN_3034381, ILMN_1250929, ILMN_2890574, ILMN_2845214, ILMN_1251572, ILMN_3114413, ILMN_3108109, ILMN_1250574, ILMN_2654013, ILMN_2679755	1951	60	17854	3.0504	0.00602196	0.000232287	0.0174246
GOTERM_CC_FAT	GO:0005643~nuclear pore	19	0.92233	1.59287e-05	ILMN_2764995, ILMN_2923599, ILMN_3135931, ILMN_2709901, ILMN_2678828, ILMN_3024099, ILMN_1220943, ILMN_2748839, ILMN_3110425, ILMN_2872537, ILMN_2686044, ILMN_2464553, ILMN_3034381, ILMN_2890574, ILMN_1250929, ILMN_2594971, ILMN_1251572, ILMN_2617265, ILMN_2670415, ILMN_3108109, ILMN_1250574, ILMN_2654013	1289	59	12504	3.1239	0.00832778	0.00033445	0.0230929
GOTERM_BP_FAT	GO:0015931~nucleobase, nucleoside, nucleotide and nucleic acid transport	22	1.06796	2.01634e-05	ILMN_3162184, ILMN_2709901, ILMN_2678828, ILMN_3024099, ILMN_2999007, ILMN_1220943, ILMN_2850527, ILMN_2748839, ILMN_3110425, ILMN_2872537, ILMN_1223793, ILMN_3003567, ILMN_2686044, ILMN_3034381, ILMN_1250929, ILMN_2890574, ILMN_2845214, ILMN_1251572, ILMN_3114413, ILMN_2698282, ILMN_3108109, ILMN_1250574, ILMN_2654013, ILMN_2679755	1454	74	13588	2.77832	0.0631096	0.00158871	0.0366038
SP_PIR_KEYWORDS	nuclear pore complex	13	0.631068	5.3673e-05	ILMN_2709901, ILMN_2678828, ILMN_3024099, ILMN_1220943, ILMN_2748839, ILMN_3110425, ILMN_2872537, ILMN_2686044, ILMN_3034381, ILMN_1250929, ILMN_2890574, ILMN_1251572, ILMN_3108109, ILMN_1250574, ILMN_2654013	1951	31	17854	3.8376	0.0264281	0.000863613	0.0772419
GOTERM_CC_FAT	GO:0046930~pore complex	20	0.970874	0.000106954	ILMN_2764995, ILMN_2832808, ILMN_2923599, ILMN_3135931, ILMN_2709901, ILMN_2678828, ILMN_3024099, ILMN_1220943, ILMN_2748839, ILMN_3110425, ILMN_2872537, ILMN_2686044, ILMN_2464553, ILMN_3034381, ILMN_2890574, ILMN_2594971, ILMN_1250929, ILMN_1251572, ILMN_2617265, ILMN_2670415, ILMN_3108109, ILMN_1250574, ILMN_2654013	1289	73	12504	2.65768	0.0546063	0.00200348	0.154963
GOTERM_CC_FAT	GO:0005635~nuclear envelope	32	1.5534	0.000169683	ILMN_2764995, ILMN_2516266, ILMN_2768330, ILMN_2718815, ILMN_2709901, ILMN_3009948, ILMN_3108560, ILMN_2704509, ILMN_2678828, ILMN_2796651, ILMN_3024099, ILMN_1220943, ILMN_3110425, ILMN_2972392, ILMN_1238081, ILMN_2594971, ILMN_1250929, ILMN_2845214, ILMN_2617265, ILMN_2670415, ILMN_3108109, ILMN_2737158, ILMN_1250574, ILMN_2654013, ILMN_3121891, ILMN_2923599, ILMN_3135931, ILMN_2669404, ILMN_27…	1289	153	12504	2.02887	0.0852379	0.00286978	0.245745
Annotation Cluster 13	Enrichment Score: 4.635848925278829
Category	Term	Count	%	PValue	Genes	List Total	Pop Hits	Pop Total	Fold Enrichment	Bonferroni	Benjamini	FDR
KEGG_PATHWAY	mmu04120:Ubiquitin mediated proteolysis	39	1.8932	4.32253e-08	ILMN_2982958, ILMN_2724386, ILMN_1215117, ILMN_2513849, ILMN_3160787, ILMN_2763115, ILMN_2990616, ILMN_2719001, ILMN_1224561, ILMN_2423789, ILMN_2762745, ILMN_3158200, ILMN_2592779, ILMN_2717727, ILMN_2648397, ILMN_2956895, ILMN_1258406, ILMN_2934534, ILMN_3100042, ILMN_3005669, ILMN_2960750, ILMN_1227889, ILMN_2796089, ILMN_1231854, ILMN_1250774, ILMN_2850753, ILMN_1254374, ILMN_1230583, ILMN_25…	643	136	5738	2.55903	7.69408e-06	3.84705e-06	5.31434e-05
GOTERM_BP_FAT	GO:0070647~protein modification by small protein conjugation or removal	30	1.45631	8.5267e-07	ILMN_2495939, ILMN_1256971, ILMN_2990220, ILMN_1224117, ILMN_1214110, ILMN_2704509, ILMN_2762745, ILMN_2717727, ILMN_2651534, ILMN_1236369, ILMN_3122383, ILMN_1250929, ILMN_2934534, ILMN_3005669, ILMN_2681814, ILMN_1227889, ILMN_1246724, ILMN_1250774, ILMN_2761459, ILMN_2850753, ILMN_1230583, ILMN_2491301, ILMN_2791578, ILMN_2645439, ILMN_1227863, ILMN_2590349, ILMN_2933834, ILMN_2590350, ILMN_26…	1454	104	13588	2.69575	0.00275289	0.000110261	0.00154816
GOTERM_MF_FAT	GO:0016879~ligase activity, forming carbon-nitrogen bonds	43	2.08738	2.62863e-06	ILMN_2724386, ILMN_1224561, ILMN_1214110, ILMN_2704509, ILMN_2755915, ILMN_2717727, ILMN_1214450, ILMN_2934534, ILMN_1227218, ILMN_2647156, ILMN_3005669, ILMN_2682811, ILMN_2761459, ILMN_2850753, ILMN_1230583, ILMN_3161591, ILMN_2512043, ILMN_2878501, ILMN_2590349, ILMN_2933834, ILMN_2590350, ILMN_2512042, ILMN_2635377, ILMN_2935999, ILMN_2932539, ILMN_1216416, ILMN_2462202, ILMN_1225124, ILMN_12…	1385	193	13288	2.13757	0.00282441	0.000257095	0.00419185
GOTERM_MF_FAT	GO:0019787~small conjugating protein ligase activity	31	1.50485	9.24373e-06	ILMN_1225124, ILMN_2724386, ILMN_1215117, ILMN_2763115, ILMN_1224561, ILMN_1224117, ILMN_1214110, ILMN_2704509, ILMN_2762745, ILMN_2717727, ILMN_2651534, ILMN_2934534, ILMN_1227218, ILMN_3005669, ILMN_2682811, ILMN_1227889, ILMN_1231854, ILMN_1250774, ILMN_2761459, ILMN_2850753, ILMN_1230583, ILMN_3161591, ILMN_2512043, ILMN_2645439, ILMN_1227863, ILMN_2590349, ILMN_2933834, ILMN_2590350, ILMN_25…	1385	125	13288	2.37937	0.009897	0.000764808	0.0147401
GOTERM_BP_FAT	GO:0032446~protein modification by small protein conjugation	23	1.1165	1.7903e-05	ILMN_1256971, ILMN_1224117, ILMN_1214110, ILMN_2704509, ILMN_2762745, ILMN_2717727, ILMN_2651534, ILMN_2934534, ILMN_3005669, ILMN_1227889, ILMN_1250774, ILMN_1246724, ILMN_2761459, ILMN_2850753, ILMN_1230583, ILMN_2645439, ILMN_2791578, ILMN_2590349, ILMN_1227863, ILMN_2933834, ILMN_2590350, ILMN_2635377, ILMN_2935999, ILMN_2932539, ILMN_2594344, ILMN_2462202	1454	79	13588	2.72077	0.0562377	0.00144598	0.032501
GOTERM_MF_FAT	GO:0016881~acid-amino acid ligase activity	36	1.74757	3.54932e-05	ILMN_1225124, ILMN_2724386, ILMN_1215117, ILMN_2763115, ILMN_1224561, ILMN_1224117, ILMN_1214110, ILMN_2704509, ILMN_2762745, ILMN_2717727, ILMN_2651534, ILMN_2934534, ILMN_1227218, ILMN_3005669, ILMN_2682811, ILMN_1227889, ILMN_1250774, ILMN_1231854, ILMN_2761459, ILMN_2850753, ILMN_1230583, ILMN_3161591, ILMN_2512043, ILMN_3163529, ILMN_2660386, ILMN_2878501, ILMN_2645439, ILMN_1227863, ILMN_25…	1385	166	13288	2.08068	0.0374713	0.00254285	0.0565867
GOTERM_MF_FAT	GO:0004842~ubiquitin-protein ligase activity	24	1.16505	0.000360847	ILMN_1225124, ILMN_2724386, ILMN_1215117, ILMN_2763115, ILMN_1224561, ILMN_1224117, ILMN_1214110, ILMN_2717727, ILMN_2651534, ILMN_2934534, ILMN_1227218, ILMN_3005669, ILMN_1231854, ILMN_1250774, ILMN_2761459, ILMN_2850753, ILMN_1230583, ILMN_2512043, ILMN_2645439, ILMN_1227863, ILMN_2933834, ILMN_2512042, ILMN_2635377, ILMN_2935999, ILMN_2932539, ILMN_1216416, ILMN_2738699, ILMN_2462202, ILMN_25…	1385	104	13288	2.21405	0.321819	0.0183225	0.5739
GOTERM_CC_FAT	GO:0000151~ubiquitin ligase complex	15	0.728155	0.00260807	ILMN_1225124, ILMN_2513849, ILMN_1230583, ILMN_1214110, ILMN_2645439, ILMN_2717727, ILMN_2651534, ILMN_3149680, ILMN_2635377, ILMN_2956895, ILMN_2935999, ILMN_2934534, ILMN_1227218, ILMN_2932539, ILMN_2738699, ILMN_2594344	1289	60	12504	2.42514	0.746154	0.0306792	3.71564
GOTERM_BP_FAT	GO:0016567~protein ubiquitination	16	0.776699	0.0035363	ILMN_1250774, ILMN_2761459, ILMN_2850753, ILMN_1230583, ILMN_1224117, ILMN_1214110, ILMN_2791578, ILMN_2645439, ILMN_1227863, ILMN_2933834, ILMN_2717727, ILMN_2651534, ILMN_2635377, ILMN_2935999, ILMN_2934534, ILMN_2932539, ILMN_3005669, ILMN_2594344	1454	66	13588	2.26552	0.999989	0.124689	6.22964
Annotation Cluster 14	Enrichment Score: 4.604113577683218
Category	Term	Count	%	PValue	Genes	List Total	Pop Hits	Pop Total	Fold Enrichment	Bonferroni	Benjamini	FDR
GOTERM_BP_FAT	GO:0032774~RNA biosynthetic process	32	1.5534	6.56848e-06	ILMN_2828687, ILMN_2749847, ILMN_2743494, ILMN_2758632, ILMN_2762745, ILMN_3020829, ILMN_2758631, ILMN_2675433, ILMN_2624809, ILMN_2652394, ILMN_2742455, ILMN_2826161, ILMN_2818189, ILMN_2735633, ILMN_2749937, ILMN_2997308, ILMN_2466845, ILMN_2949886, ILMN_2896229, ILMN_2869461, ILMN_2736611, ILMN_1252302, ILMN_2965417, ILMN_2624135, ILMN_2894751, ILMN_1229545, ILMN_2666438, ILMN_2995129, ILMN_29…	1454	126	13588	2.3734	0.0210121	0.000606558	0.0119255
GOTERM_BP_FAT	GO:0006351~transcription, DNA-dependent	31	1.50485	9.30905e-06	ILMN_2828687, ILMN_2749847, ILMN_2743494, ILMN_2758632, ILMN_2762745, ILMN_3020829, ILMN_2758631, ILMN_2675433, ILMN_2624809, ILMN_2652394, ILMN_2742455, ILMN_2826161, ILMN_2818189, ILMN_2735633, ILMN_2749937, ILMN_2997308, ILMN_2466845, ILMN_2896229, ILMN_2869461, ILMN_1252302, ILMN_2736611, ILMN_2965417, ILMN_2624135, ILMN_2894751, ILMN_1229545, ILMN_2666438, ILMN_2995129, ILMN_2938893, ILMN_12…	1454	122	13588	2.37461	0.0296479	0.000791694	0.0169008
GOTERM_CC_FAT	GO:0016591~DNA-directed RNA polymerase II, holoenzyme	18	0.873786	2.93127e-05	ILMN_2997308, ILMN_2749847, ILMN_2869461, ILMN_2743494, ILMN_1252302, ILMN_2736611, ILMN_2678269, ILMN_1249116, ILMN_2624135, ILMN_2758632, ILMN_2758631, ILMN_2522765, ILMN_2711570, ILMN_2666438, ILMN_2995129, ILMN_1234905, ILMN_2826161, ILMN_2690306, ILMN_1218154, ILMN_2946281, ILMN_2952587	1289	56	12504	3.11803	0.0152716	0.000591725	0.0424926
GOTERM_BP_FAT	GO:0006366~transcription from RNA polymerase II promoter	20	0.970874	0.000213855	ILMN_2997308, ILMN_2749847, ILMN_2869461, ILMN_2743494, ILMN_2736611, ILMN_2624135, ILMN_2758632, ILMN_2894751, ILMN_2758631, ILMN_1229545, ILMN_2675433, ILMN_2666438, ILMN_2938893, ILMN_1234905, ILMN_2742455, ILMN_2652394, ILMN_2818189, ILMN_2690306, ILMN_1213872, ILMN_1218154, ILMN_2946281, ILMN_2759669, ILMN_2652909, ILMN_2749937	1454	74	13588	2.52574	0.499159	0.0120577	0.387579
Annotation Cluster 15	Enrichment Score: 3.5890912147541054
Category	Term	Count	%	PValue	Genes	List Total	Pop Hits	Pop Total	Fold Enrichment	Bonferroni	Benjamini	FDR
GOTERM_BP_FAT	GO:0043933~macromolecular complex subunit organization	67	3.25243	1.46856e-05	ILMN_1257428, ILMN_2764995, ILMN_2749847, ILMN_2914510, ILMN_2598990, ILMN_2620053, ILMN_2942492, ILMN_2995755, ILMN_2712642, ILMN_2642063, ILMN_2742455, ILMN_3116330, ILMN_3021465, ILMN_2420070, ILMN_2920800, ILMN_2617265, ILMN_2698282, ILMN_2741726, ILMN_2874662, ILMN_2631813, ILMN_3154810, ILMN_2588051, ILMN_2646556, ILMN_2869461, ILMN_2664593, ILMN_1251876, ILMN_2736611, ILMN_1252302, ILMN_29…	1454	367	13588	1.70608	0.0463694	0.00121667	0.0266608
GOTERM_BP_FAT	GO:0065003~macromolecular complex assembly	61	2.96117	5.24217e-05	ILMN_1257428, ILMN_2764995, ILMN_2749847, ILMN_2914510, ILMN_2598990, ILMN_2620053, ILMN_2942492, ILMN_2712642, ILMN_2742455, ILMN_3116330, ILMN_3021465, ILMN_2420070, ILMN_2920800, ILMN_2617265, ILMN_2698282, ILMN_2741726, ILMN_2874662, ILMN_2631813, ILMN_3154810, ILMN_2588051, ILMN_2869461, ILMN_2664593, ILMN_1251876, ILMN_2736611, ILMN_1252302, ILMN_2923599, ILMN_2842767, ILMN_2491301, ILMN_26…	1454	338	13588	1.68657	0.1559	0.00393373	0.0951378
GOTERM_BP_FAT	GO:0034621~cellular macromolecular complex subunit organization	47	2.28155	9.90161e-05	ILMN_1257428, ILMN_2764995, ILMN_2914510, ILMN_2942492, ILMN_2995755, ILMN_2712642, ILMN_2642063, ILMN_3021465, ILMN_2420070, ILMN_2617265, ILMN_2920800, ILMN_2698282, ILMN_2741726, ILMN_2874662, ILMN_2631813, ILMN_2588051, ILMN_3154810, ILMN_2646556, ILMN_2664593, ILMN_1251876, ILMN_2923599, ILMN_2601118, ILMN_2729958, ILMN_2894751, ILMN_2995129, ILMN_2615901, ILMN_2464553, ILMN_2755730, ILMN_12…	1454	245	13588	1.79276	0.273949	0.00651207	0.179628
GOTERM_BP_FAT	GO:0034622~cellular macromolecular complex assembly	42	2.03883	0.000201026	ILMN_1257428, ILMN_2764995, ILMN_1230007, ILMN_2914510, ILMN_2994806, ILMN_2907878, ILMN_2942492, ILMN_3074516, ILMN_1232524, ILMN_2517170, ILMN_2712642, ILMN_1228762, ILMN_1236796, ILMN_3021465, ILMN_2420070, ILMN_2920800, ILMN_2617265, ILMN_2698282, ILMN_2774163, ILMN_2741726, ILMN_2631813, ILMN_2874662, ILMN_2464061, ILMN_3154810, ILMN_2588051, ILMN_1227164, ILMN_2664593, ILMN_2923599, ILMN_12…	1454	217	13588	1.80876	0.477945	0.0117483	0.364368
GOTERM_BP_FAT	GO:0070271~protein complex biogenesis	41	1.99029	0.00101679	ILMN_1257428, ILMN_2764995, ILMN_1230007, ILMN_2749847, ILMN_2914510, ILMN_2655204, ILMN_2598990, ILMN_2620053, ILMN_3074516, ILMN_2517170, ILMN_1228762, ILMN_2742455, ILMN_2826161, ILMN_3116330, ILMN_2420070, ILMN_2617265, ILMN_2749937, ILMN_1232458, ILMN_2874662, ILMN_2464061, ILMN_2779913, ILMN_2974798, ILMN_2588051, ILMN_1227164, ILMN_2869461, ILMN_2923599, ILMN_2736611, ILMN_2842767, ILMN_12…	1454	227	13588	1.68791	0.962707	0.0452666	1.83013
GOTERM_BP_FAT	GO:0006461~protein complex assembly	41	1.99029	0.00101679	ILMN_1257428, ILMN_2764995, ILMN_1230007, ILMN_2749847, ILMN_2914510, ILMN_2655204, ILMN_2598990, ILMN_2620053, ILMN_3074516, ILMN_2517170, ILMN_1228762, ILMN_2742455, ILMN_2826161, ILMN_3116330, ILMN_2420070, ILMN_2617265, ILMN_2749937, ILMN_1232458, ILMN_2874662, ILMN_2464061, ILMN_2779913, ILMN_2974798, ILMN_2588051, ILMN_1227164, ILMN_2869461, ILMN_2923599, ILMN_2736611, ILMN_2842767, ILMN_12…	1454	227	13588	1.68791	0.962707	0.0452666	1.83013
GOTERM_BP_FAT	GO:0043623~cellular protein complex assembly	22	1.06796	0.00474835	ILMN_1257428, ILMN_2764995, ILMN_2464061, ILMN_1230007, ILMN_2874662, ILMN_2588051, ILMN_1227164, ILMN_2914510, ILMN_2923599, ILMN_2601118, ILMN_3074516, ILMN_2894751, ILMN_2517170, ILMN_1228762, ILMN_2972459, ILMN_2995129, ILMN_2615901, ILMN_2464553, ILMN_1216721, ILMN_2420070, ILMN_1251572, ILMN_2617265	1454	108	13588	1.90366	1	0.157159	8.27908
Annotation Cluster 16	Enrichment Score: 3.5100618292691284
Category	Term	Count	%	PValue	Genes	List Total	Pop Hits	Pop Total	Fold Enrichment	Bonferroni	Benjamini	FDR
SMART	SM00320:WD40	52	2.52427	6.00301e-06	ILMN_2820260, ILMN_2688569, ILMN_2849571, ILMN_1225324, ILMN_2711355, ILMN_2421220, ILMN_2830983, ILMN_2829646, ILMN_3060168, ILMN_2999642, ILMN_3003242, ILMN_2944546, ILMN_2934534, ILMN_2953411, ILMN_2995290, ILMN_3100042, ILMN_1250574, ILMN_2476131, ILMN_1252496, ILMN_2734334, ILMN_1254374, ILMN_1213899, ILMN_2760593, ILMN_1246452, ILMN_2894751, ILMN_1242903, ILMN_2873793, ILMN_2906471, ILMN_12…	960	259	9131	1.90964	0.00211083	0.00211083	0.00821683
INTERPRO	IPR001680:WD40 repeat	52	2.52427	8.17813e-06	ILMN_2820260, ILMN_2688569, ILMN_2849571, ILMN_1225324, ILMN_2711355, ILMN_2421220, ILMN_2830983, ILMN_2829646, ILMN_3060168, ILMN_2999642, ILMN_3003242, ILMN_2944546, ILMN_2934534, ILMN_2953411, ILMN_2995290, ILMN_3100042, ILMN_1250574, ILMN_2476131, ILMN_1252496, ILMN_2734334, ILMN_1254374, ILMN_1213899, ILMN_2760593, ILMN_1246452, ILMN_2894751, ILMN_1242903, ILMN_2873793, ILMN_2906471, ILMN_12…	1876	259	17763	1.90102	0.0192277	0.0192277	0.0143412
INTERPRO	IPR015943:WD40/YVTN repeat-like	58	2.81553	1.28471e-05	ILMN_2820260, ILMN_2688569, ILMN_2849571, ILMN_1225324, ILMN_2828877, ILMN_2711355, ILMN_2421220, ILMN_2830983, ILMN_2829646, ILMN_3060168, ILMN_2999642, ILMN_3003242, ILMN_2769285, ILMN_2944546, ILMN_2934534, ILMN_2953411, ILMN_2995290, ILMN_3100042, ILMN_1250574, ILMN_2476131, ILMN_1252496, ILMN_2734334, ILMN_1254374, ILMN_1213899, ILMN_2760593, ILMN_1246452, ILMN_2894751, ILMN_1242903, ILMN_28…	1876	305	17763	1.80058	0.0300388	0.0151339	0.0225279
SP_PIR_KEYWORDS	wd repeat	52	2.52427	3.20413e-05	ILMN_2820260, ILMN_2688569, ILMN_2849571, ILMN_1225324, ILMN_2711355, ILMN_2421220, ILMN_2830983, ILMN_2829646, ILMN_2717727, ILMN_2999642, ILMN_3003242, ILMN_2944546, ILMN_2934534, ILMN_2953411, ILMN_2995290, ILMN_3100042, ILMN_1250574, ILMN_2476131, ILMN_1252496, ILMN_2790735, ILMN_2734334, ILMN_1254374, ILMN_1213899, ILMN_2760593, ILMN_1246452, ILMN_2894751, ILMN_1242903, ILMN_2873793, ILMN_29…	1951	263	17854	1.80936	0.0158617	0.000551189	0.046118
INTERPRO	IPR019781:WD40 repeat, subgroup	46	2.23301	5.52471e-05	ILMN_2820260, ILMN_2688569, ILMN_2849571, ILMN_1225324, ILMN_2711355, ILMN_2421220, ILMN_2830983, ILMN_3003242, ILMN_2944546, ILMN_2934534, ILMN_2953411, ILMN_3100042, ILMN_2995290, ILMN_1250574, ILMN_2476131, ILMN_1252496, ILMN_1254374, ILMN_1213899, ILMN_2760593, ILMN_1246452, ILMN_1242903, ILMN_2894751, ILMN_2873793, ILMN_2906471, ILMN_1224907, ILMN_2906473, ILMN_2512206, ILMN_2457326, ILMN_31…	1876	235	17763	1.85342	0.122923	0.0427781	0.0968441
INTERPRO	IPR019775:WD40 repeat, conserved site	48	2.3301	0.000134884	ILMN_2820260, ILMN_2688569, ILMN_1225324, ILMN_2711355, ILMN_2421220, ILMN_2830983, ILMN_2829646, ILMN_2717727, ILMN_2999642, ILMN_3003242, ILMN_2944546, ILMN_2934534, ILMN_3100042, ILMN_2995290, ILMN_1250574, ILMN_2476131, ILMN_1252496, ILMN_2734334, ILMN_1254374, ILMN_1213899, ILMN_2760593, ILMN_1246452, ILMN_1242903, ILMN_2894751, ILMN_2873793, ILMN_2906471, ILMN_1235687, ILMN_1224907, ILMN_29…	1876	258	17763	1.76159	0.274022	0.0769381	0.236286
INTERPRO	IPR017986:WD40 repeat, region	43	2.08738	0.000233145	ILMN_2820260, ILMN_2688569, ILMN_2849571, ILMN_1225324, ILMN_2711355, ILMN_2421220, ILMN_2830983, ILMN_3003242, ILMN_2934534, ILMN_2953411, ILMN_3100042, ILMN_2995290, ILMN_1250574, ILMN_1252496, ILMN_1254374, ILMN_1213899, ILMN_2760593, ILMN_1246452, ILMN_1242903, ILMN_2894751, ILMN_2873793, ILMN_2906471, ILMN_1224907, ILMN_2906473, ILMN_2512206, ILMN_2457326, ILMN_3124364, ILMN_2719001, ILMN_12…	1876	228	17763	1.78574	0.425095	0.0760328	0.408086
INTERPRO	IPR019782:WD40 repeat 2	41	1.99029	0.000237121	ILMN_2688569, ILMN_2820260, ILMN_2849571, ILMN_1225324, ILMN_2711355, ILMN_2421220, ILMN_2830983, ILMN_3003242, ILMN_2934534, ILMN_2953411, ILMN_3100042, ILMN_1250574, ILMN_1252496, ILMN_1254374, ILMN_1213899, ILMN_2760593, ILMN_1246452, ILMN_1242903, ILMN_2894751, ILMN_2873793, ILMN_2906471, ILMN_1224907, ILMN_2906473, ILMN_2512206, ILMN_2457326, ILMN_3124364, ILMN_2719001, ILMN_1212636, ILMN_12…	1876	214	17763	1.81407	0.430497	0.0679547	0.415031
UP_SEQ_FEATURE	repeat:WD 2	48	2.3301	0.00032324	ILMN_2820260, ILMN_2688569, ILMN_1225324, ILMN_2711355, ILMN_2421220, ILMN_2830983, ILMN_2829646, ILMN_2717727, ILMN_2999642, ILMN_3003242, ILMN_2944546, ILMN_2934534, ILMN_2995290, ILMN_1250574, ILMN_2476131, ILMN_1252496, ILMN_2790735, ILMN_2734334, ILMN_1254374, ILMN_1213899, ILMN_2760593, ILMN_1246452, ILMN_1242903, ILMN_2894751, ILMN_2873793, ILMN_2906471, ILMN_1235687, ILMN_1224907, ILMN_29…	1937	235	16021	1.6894	0.728688	0.352624	0.599549
UP_SEQ_FEATURE	repeat:WD 1	48	2.3301	0.00032324	ILMN_2820260, ILMN_2688569, ILMN_1225324, ILMN_2711355, ILMN_2421220, ILMN_2830983, ILMN_2829646, ILMN_2717727, ILMN_2999642, ILMN_3003242, ILMN_2944546, ILMN_2934534, ILMN_2995290, ILMN_1250574, ILMN_2476131, ILMN_1252496, ILMN_2790735, ILMN_2734334, ILMN_1254374, ILMN_1213899, ILMN_2760593, ILMN_1246452, ILMN_1242903, ILMN_2894751, ILMN_2873793, ILMN_2906471, ILMN_1235687, ILMN_1224907, ILMN_29…	1937	235	16021	1.6894	0.728688	0.352624	0.599549
UP_SEQ_FEATURE	repeat:WD 3	47	2.28155	0.000411251	ILMN_2820260, ILMN_2688569, ILMN_1225324, ILMN_2711355, ILMN_2421220, ILMN_2830983, ILMN_2829646, ILMN_2717727, ILMN_2999642, ILMN_3003242, ILMN_2944546, ILMN_2934534, ILMN_2995290, ILMN_1250574, ILMN_2476131, ILMN_1252496, ILMN_2790735, ILMN_1254374, ILMN_1213899, ILMN_2734334, ILMN_2760593, ILMN_1246452, ILMN_1242903, ILMN_2894751, ILMN_2873793, ILMN_2906471, ILMN_1235687, ILMN_1224907, ILMN_29…	1937	231	16021	1.68285	0.809812	0.339617	0.762203
UP_SEQ_FEATURE	repeat:WD 4	43	2.08738	0.00141507	ILMN_2820260, ILMN_2688569, ILMN_1225324, ILMN_2711355, ILMN_2421220, ILMN_2830983, ILMN_2717727, ILMN_2829646, ILMN_2999642, ILMN_3003242, ILMN_2934534, ILMN_2995290, ILMN_1250574, ILMN_2476131, ILMN_1252496, ILMN_2790735, ILMN_1254374, ILMN_1213899, ILMN_2734334, ILMN_1246452, ILMN_1242903, ILMN_2894751, ILMN_2873793, ILMN_2906471, ILMN_1235687, ILMN_2906473, ILMN_2512206, ILMN_2457326, ILMN_31…	1937	218	16021	1.63144	0.9967	0.557921	2.59964
UP_SEQ_FEATURE	repeat:WD 5	38	1.84466	0.00624567	ILMN_2688569, ILMN_2820260, ILMN_1225324, ILMN_2711355, ILMN_2421220, ILMN_2830983, ILMN_2717727, ILMN_2829646, ILMN_2999642, ILMN_2934534, ILMN_2995290, ILMN_1250574, ILMN_2476131, ILMN_1252496, ILMN_2790735, ILMN_1213899, ILMN_1254374, ILMN_2734334, ILMN_1246452, ILMN_2894751, ILMN_2873793, ILMN_2906471, ILMN_1235687, ILMN_2906473, ILMN_2512206, ILMN_2457326, ILMN_3124364, ILMN_2719001, ILMN_12…	1937	202	16021	1.55594	1	0.87836	11.0005
UP_SEQ_FEATURE	repeat:WD 6	29	1.40777	0.0297246	ILMN_3124364, ILMN_2688569, ILMN_1225324, ILMN_1212636, ILMN_1253677, ILMN_3024099, ILMN_2681906, ILMN_2421220, ILMN_2615448, ILMN_2830983, ILMN_2659960, ILMN_2829646, ILMN_2717727, ILMN_1257485, ILMN_2934534, ILMN_2995290, ILMN_1250574, ILMN_2691192, ILMN_2616786, ILMN_2476131, ILMN_1219275, ILMN_1252496, ILMN_2790735, ILMN_1213899, ILMN_1254374, ILMN_2834573, ILMN_1246452, ILMN_2724322, ILMN_26…	1937	161	16021	1.48981	1	0.987074	42.9527
UP_SEQ_FEATURE	repeat:WD 7	19	0.92233	0.237704	ILMN_3124364, ILMN_1212636, ILMN_1253677, ILMN_2421220, ILMN_2830983, ILMN_2717727, ILMN_2829646, ILMN_2934534, ILMN_2995290, ILMN_2691192, ILMN_2616786, ILMN_2476131, ILMN_1219275, ILMN_1252496, ILMN_1254374, ILMN_2834573, ILMN_2724322, ILMN_2629971, ILMN_2894751, ILMN_2873793, ILMN_2460168, ILMN_2680852, ILMN_2906471, ILMN_2691187, ILMN_2906473, ILMN_1238928, ILMN_2962747	1937	124	16021	1.26734	1	0.999995	99.3582
Annotation Cluster 17	Enrichment Score: 3.353394133060825
Category	Term	Count	%	PValue	Genes	List Total	Pop Hits	Pop Total	Fold Enrichment	Bonferroni	Benjamini	FDR
GOTERM_BP_FAT	GO:0006399~tRNA metabolic process	33	1.60194	1.58878e-07	ILMN_3139479, ILMN_2828687, ILMN_1232428, ILMN_2705969, ILMN_2606848, ILMN_2591217, ILMN_2979430, ILMN_1258042, ILMN_3156343, ILMN_1218584, ILMN_2688721, ILMN_2871412, ILMN_2628175, ILMN_2857581, ILMN_2749382, ILMN_1254157, ILMN_1254444, ILMN_2729008, ILMN_2907642, ILMN_2928160, ILMN_3102333, ILMN_2589477, ILMN_2439341, ILMN_2591823, ILMN_2859678, ILMN_3146224, ILMN_2810045, ILMN_2835012, ILMN_27…	1454	113	13588	2.72915	0.000513521	2.56823e-05	0.00028847
SP_PIR_KEYWORDS	protein biosynthesis	37	1.79612	5.56744e-07	ILMN_3139479, ILMN_1243395, ILMN_2828687, ILMN_2715215, ILMN_1244330, ILMN_2591217, ILMN_2606848, ILMN_2659229, ILMN_2678828, ILMN_2462448, ILMN_3156343, ILMN_2995755, ILMN_2755915, ILMN_2688721, ILMN_2871412, ILMN_2893077, ILMN_1377920, ILMN_1214450, ILMN_2892376, ILMN_2857581, ILMN_2924030, ILMN_2749382, ILMN_2647156, ILMN_1254157, ILMN_2774163, ILMN_2624018, ILMN_2762301, ILMN_2646556, ILMN_29…	1951	139	17854	2.43593	0.000277777	1.46218e-05	0.000801506
GOTERM_MF_FAT	GO:0004812~aminoacyl-tRNA ligase activity	16	0.776699	6.70967e-05	ILMN_3139479, ILMN_2828687, ILMN_2907642, ILMN_2628551, ILMN_2928160, ILMN_3102333, ILMN_2439341, ILMN_2589477, ILMN_2606848, ILMN_2591217, ILMN_3156343, ILMN_3146224, ILMN_2688721, ILMN_2810045, ILMN_2871412, ILMN_3003567, ILMN_2857581, ILMN_2749382, ILMN_1237234, ILMN_2794460, ILMN_1254157	1385	48	13288	3.19807	0.0696538	0.00450224	0.106947
GOTERM_MF_FAT	GO:0016876~ligase activity, forming aminoacyl-tRNA and related compounds	16	0.776699	6.70967e-05	ILMN_3139479, ILMN_2828687, ILMN_2907642, ILMN_2628551, ILMN_2928160, ILMN_3102333, ILMN_2439341, ILMN_2589477, ILMN_2606848, ILMN_2591217, ILMN_3156343, ILMN_3146224, ILMN_2688721, ILMN_2810045, ILMN_2871412, ILMN_3003567, ILMN_2857581, ILMN_2749382, ILMN_1237234, ILMN_2794460, ILMN_1254157	1385	48	13288	3.19807	0.0696538	0.00450224	0.106947
GOTERM_MF_FAT	GO:0016875~ligase activity, forming carbon-oxygen bonds	16	0.776699	6.70967e-05	ILMN_3139479, ILMN_2828687, ILMN_2907642, ILMN_2628551, ILMN_2928160, ILMN_3102333, ILMN_2439341, ILMN_2589477, ILMN_2606848, ILMN_2591217, ILMN_3156343, ILMN_3146224, ILMN_2688721, ILMN_2810045, ILMN_2871412, ILMN_3003567, ILMN_2857581, ILMN_2749382, ILMN_1237234, ILMN_2794460, ILMN_1254157	1385	48	13288	3.19807	0.0696538	0.00450224	0.106947
KEGG_PATHWAY	mmu00970:Aminoacyl-tRNA biosynthesis	14	0.679612	0.000445146	ILMN_3139479, ILMN_2828687, ILMN_2907642, ILMN_2928160, ILMN_3102333, ILMN_2439341, ILMN_2589477, ILMN_2606848, ILMN_2591217, ILMN_3156343, ILMN_3146224, ILMN_2755915, ILMN_2688721, ILMN_2810045, ILMN_2871412, ILMN_2857581, ILMN_2749382, ILMN_2647156, ILMN_1237234, ILMN_1254157	643	42	5738	2.9746	0.0761944	0.00876729	0.545911
SP_PIR_KEYWORDS	Aminoacyl-tRNA synthetase	13	0.631068	0.00064811	ILMN_3139479, ILMN_2828687, ILMN_2907642, ILMN_2928160, ILMN_3102333, ILMN_2439341, ILMN_2589477, ILMN_2606848, ILMN_2591217, ILMN_3156343, ILMN_3146224, ILMN_2688721, ILMN_2810045, ILMN_2871412, ILMN_2857581, ILMN_2749382, ILMN_1237234, ILMN_1254157	1951	39	17854	3.0504	0.276397	0.00805518	0.929003
GOTERM_BP_FAT	GO:0043038~amino acid activation	14	0.679612	0.000782431	ILMN_3139479, ILMN_2828687, ILMN_2907642, ILMN_2928160, ILMN_3102333, ILMN_2439341, ILMN_2589477, ILMN_2606848, ILMN_2591217, ILMN_3156343, ILMN_3146224, ILMN_2688721, ILMN_2810045, ILMN_2871412, ILMN_3003567, ILMN_2857581, ILMN_2749382, ILMN_1237234, ILMN_1254157	1454	46	13588	2.84421	0.920388	0.0365306	1.41114
GOTERM_BP_FAT	GO:0043039~tRNA aminoacylation	14	0.679612	0.000782431	ILMN_3139479, ILMN_2828687, ILMN_2907642, ILMN_2928160, ILMN_3102333, ILMN_2439341, ILMN_2589477, ILMN_2606848, ILMN_2591217, ILMN_3156343, ILMN_3146224, ILMN_2688721, ILMN_2810045, ILMN_2871412, ILMN_3003567, ILMN_2857581, ILMN_2749382, ILMN_1237234, ILMN_1254157	1454	46	13588	2.84421	0.920388	0.0365306	1.41114
GOTERM_BP_FAT	GO:0006418~tRNA aminoacylation for protein translation	14	0.679612	0.000782431	ILMN_3139479, ILMN_2828687, ILMN_2907642, ILMN_2928160, ILMN_3102333, ILMN_2439341, ILMN_2589477, ILMN_2606848, ILMN_2591217, ILMN_3156343, ILMN_3146224, ILMN_2688721, ILMN_2810045, ILMN_2871412, ILMN_3003567, ILMN_2857581, ILMN_2749382, ILMN_1237234, ILMN_1254157	1454	46	13588	2.84421	0.920388	0.0365306	1.41114
INTERPRO	IPR001412:Aminoacyl-tRNA synthetase, class I, conserved site	11	0.533981	0.00203602	ILMN_2828687, ILMN_2907642, ILMN_1232386, ILMN_2928160, ILMN_2591217, ILMN_2439341, ILMN_3156343, ILMN_3146224, ILMN_2615448, ILMN_2810045, ILMN_3003567, ILMN_2857581, ILMN_2953411, ILMN_1254157	1876	34	17763	3.06335	0.992081	0.310775	3.51114
UP_SEQ_FEATURE	short sequence motif:"HIGH" region	7	0.339806	0.0117202	ILMN_2810045, ILMN_2828687, ILMN_2907642, ILMN_2928160, ILMN_2857581, ILMN_2439341, ILMN_2591217, ILMN_3156343, ILMN_3146224, ILMN_1254157	1937	17	16021	3.40572	1	0.928838	19.6915
INTERPRO	IPR014729:Rossmann-like alpha/beta/alpha sandwich fold	10	0.485437	0.0212751	ILMN_2828687, ILMN_2907642, ILMN_2939303, ILMN_2928160, ILMN_2591217, ILMN_2439341, ILMN_3156343, ILMN_2649966, ILMN_3146224, ILMN_2810045, ILMN_2594477, ILMN_2859978, ILMN_2857581, ILMN_1254157	1876	40	17763	2.36714	1	0.748367	31.4175
INTERPRO	IPR006195:Aminoacyl-tRNA synthetase, class II, conserved region	6	0.291262	0.0273011	ILMN_3139479, ILMN_2871412, ILMN_3102333, ILMN_2589477, ILMN_2606848, ILMN_2749382, ILMN_1237234, ILMN_2688721	1876	17	17763	3.34184	1	0.790832	38.4576
UP_SEQ_FEATURE	short sequence motif:"KMSKS" region	5	0.242718	0.0977254	ILMN_2810045, ILMN_2828687, ILMN_2928160, ILMN_2439341, ILMN_3156343, ILMN_3146224, ILMN_1254157	1937	15	16021	2.75701	1	0.999118	85.2341
Annotation Cluster 18	Enrichment Score: 3.341838228835227
Category	Term	Count	%	PValue	Genes	List Total	Pop Hits	Pop Total	Fold Enrichment	Bonferroni	Benjamini	FDR
GOTERM_BP_FAT	GO:0033554~cellular response to stress	70	3.39806	5.32096e-05	ILMN_2792089, ILMN_2719620, ILMN_2610835, ILMN_2621385, ILMN_1216295, ILMN_2933993, ILMN_2715215, ILMN_2705324, ILMN_1213055, ILMN_2710538, ILMN_2796353, ILMN_1214110, ILMN_3160475, ILMN_3007271, ILMN_2880623, ILMN_2741132, ILMN_2805945, ILMN_3028981, ILMN_2662743, ILMN_2745450, ILMN_2696270, ILMN_1259904, ILMN_3021465, ILMN_2837156, ILMN_2934534, ILMN_2997308, ILMN_2971744, ILMN_2466845, ILMN_12…	1454	404	13588	1.61923	0.158047	0.00390217	0.0965671
GOTERM_BP_FAT	GO:0006974~response to DNA damage stimulus	52	2.52427	0.000181132	ILMN_2719620, ILMN_2610835, ILMN_1216295, ILMN_2621385, ILMN_2933993, ILMN_2705324, ILMN_1213055, ILMN_2710538, ILMN_2796353, ILMN_1214110, ILMN_3160475, ILMN_3007271, ILMN_2880623, ILMN_2741132, ILMN_2662743, ILMN_2745450, ILMN_2696270, ILMN_1259904, ILMN_3021465, ILMN_2837156, ILMN_2934534, ILMN_2997308, ILMN_2971744, ILMN_2466845, ILMN_1230273, ILMN_3146362, ILMN_2649828, ILMN_1230583, ILMN_26…	1454	287	13588	1.69322	0.443257	0.0111993	0.328365
GOTERM_BP_FAT	GO:0006259~DNA metabolic process	70	3.39806	0.000192004	ILMN_2719620, ILMN_2610835, ILMN_2621385, ILMN_1216295, ILMN_2933993, ILMN_2648973, ILMN_1221363, ILMN_2710538, ILMN_2796353, ILMN_1214110, ILMN_2745971, ILMN_3007271, ILMN_3160475, ILMN_2880623, ILMN_2716585, ILMN_2741132, ILMN_2662743, ILMN_2696270, ILMN_1259904, ILMN_3021465, ILMN_2837156, ILMN_2934534, ILMN_2683190, ILMN_2971744, ILMN_2997308, ILMN_2466845, ILMN_3131197, ILMN_1230273, ILMN_12…	1454	421	13588	1.55384	0.46249	0.0114306	0.348042
GOTERM_BP_FAT	GO:0006281~DNA repair	40	1.94175	0.00123798	ILMN_2719620, ILMN_2610835, ILMN_1216295, ILMN_2621385, ILMN_2933993, ILMN_1222228, ILMN_2755140, ILMN_2991107, ILMN_2719001, ILMN_2710538, ILMN_2796353, ILMN_2907878, ILMN_1214110, ILMN_3160475, ILMN_3007271, ILMN_2880623, ILMN_2741132, ILMN_2711570, ILMN_2662743, ILMN_2690410, ILMN_2828819, ILMN_2696270, ILMN_1259904, ILMN_2651534, ILMN_3021465, ILMN_2971204, ILMN_2956895, ILMN_2837156, ILMN_26…	1454	222	13588	1.68383	0.981773	0.0519977	2.22406
SP_PIR_KEYWORDS	DNA damage	36	1.74757	0.00195876	ILMN_2719620, ILMN_2610835, ILMN_1216295, ILMN_2621385, ILMN_2933993, ILMN_1222228, ILMN_2755140, ILMN_2991107, ILMN_2796353, ILMN_1214110, ILMN_2907878, ILMN_3160475, ILMN_3007271, ILMN_2711570, ILMN_2940510, ILMN_2662743, ILMN_2745450, ILMN_2828819, ILMN_2696270, ILMN_2992403, ILMN_2651534, ILMN_1259904, ILMN_3021465, ILMN_2956895, ILMN_2837156, ILMN_2637052, ILMN_2934534, ILMN_2971744, ILMN_29…	1951	194	17854	1.69816	0.62408	0.0206014	2.7832
SP_PIR_KEYWORDS	dna repair	33	1.60194	0.00198144	ILMN_2719620, ILMN_2610835, ILMN_1216295, ILMN_2621385, ILMN_2933993, ILMN_1222228, ILMN_2755140, ILMN_2991107, ILMN_2796353, ILMN_1214110, ILMN_2907878, ILMN_3160475, ILMN_3007271, ILMN_2711570, ILMN_2662743, ILMN_2828819, ILMN_2696270, ILMN_2992403, ILMN_2651534, ILMN_1259904, ILMN_3021465, ILMN_2956895, ILMN_2837156, ILMN_2637052, ILMN_2934534, ILMN_2971744, ILMN_2997308, ILMN_1230273, ILMN_27…	1951	173	17854	1.74561	0.628318	0.020408	2.815
Annotation Cluster 19	Enrichment Score: 3.1855538690355045
Category	Term	Count	%	PValue	Genes	List Total	Pop Hits	Pop Total	Fold Enrichment	Bonferroni	Benjamini	FDR
GOTERM_BP_FAT	GO:0006357~regulation of transcription from RNA polymerase II promoter	104	5.04854	2.21128e-06	ILMN_1254639, ILMN_2599858, ILMN_3109289, ILMN_2659132, ILMN_2745540, ILMN_2820260, ILMN_1242264, ILMN_1248852, ILMN_2623793, ILMN_2655694, ILMN_1232182, ILMN_2592476, ILMN_2705367, ILMN_2652394, ILMN_2652187, ILMN_1228414, ILMN_1225565, ILMN_2653251, ILMN_1246873, ILMN_3125181, ILMN_1252496, ILMN_2736611, ILMN_2986978, ILMN_1251165, ILMN_2889916, ILMN_1243885, ILMN_2976191, ILMN_1218384, ILMN_28…	1454	616	13588	1.57777	0.00712357	0.000246489	0.00401488
GOTERM_BP_FAT	GO:0010604~positive regulation of macromolecule metabolic process	101	4.90291	3.59364e-05	ILMN_1254639, ILMN_2599858, ILMN_2659132, ILMN_3109289, ILMN_2715215, ILMN_2745540, ILMN_2495939, ILMN_1248852, ILMN_1214110, ILMN_2592476, ILMN_2805945, ILMN_1257208, ILMN_2783429, ILMN_1228414, ILMN_1225565, ILMN_2756460, ILMN_3125181, ILMN_2736611, ILMN_2507286, ILMN_2930707, ILMN_2986978, ILMN_2692110, ILMN_2667100, ILMN_1243885, ILMN_2976191, ILMN_3131909, ILMN_1218384, ILMN_2886828, ILMN_27…	1454	633	13588	1.49111	0.109689	0.00276247	0.0652285
GOTERM_BP_FAT	GO:0051254~positive regulation of RNA metabolic process	71	3.4466	9.54613e-05	ILMN_1254639, ILMN_2792089, ILMN_2599858, ILMN_2659132, ILMN_3109289, ILMN_2745540, ILMN_2495939, ILMN_2705324, ILMN_1248852, ILMN_2945275, ILMN_2768330, ILMN_3121255, ILMN_2592476, ILMN_2638721, ILMN_3155789, ILMN_2628522, ILMN_1228414, ILMN_1225565, ILMN_3125181, ILMN_2466845, ILMN_1248293, ILMN_2868220, ILMN_3154640, ILMN_2852034, ILMN_2736611, ILMN_2930707, ILMN_2491301, ILMN_2986978, ILMN_28…	1454	419	13588	1.58356	0.265556	0.00654532	0.173185
GOTERM_BP_FAT	GO:0045893~positive regulation of transcription, DNA-dependent	69	3.34951	0.000229682	ILMN_1254639, ILMN_2792089, ILMN_2599858, ILMN_2659132, ILMN_3109289, ILMN_2745540, ILMN_2495939, ILMN_2705324, ILMN_1248852, ILMN_2945275, ILMN_2768330, ILMN_3121255, ILMN_2592476, ILMN_2638721, ILMN_3155789, ILMN_2628522, ILMN_1228414, ILMN_1225565, ILMN_3125181, ILMN_2466845, ILMN_1248293, ILMN_2868220, ILMN_3154640, ILMN_2852034, ILMN_2736611, ILMN_2930707, ILMN_2491301, ILMN_2986978, ILMN_28…	1454	416	13588	1.55005	0.524147	0.0125083	0.416206
GOTERM_BP_FAT	GO:0045935~positive regulation of nucleobase, nucleoside, nucleotide and nucleic acid metabolic process	81	3.93204	0.000265327	ILMN_1254639, ILMN_2792089, ILMN_2599858, ILMN_2659132, ILMN_3109289, ILMN_2697060, ILMN_2745540, ILMN_2495939, ILMN_2705324, ILMN_1248852, ILMN_2945275, ILMN_2768330, ILMN_3121255, ILMN_1214110, ILMN_2592476, ILMN_2638721, ILMN_3155789, ILMN_2742455, ILMN_2628522, ILMN_2783429, ILMN_1228414, ILMN_2770759, ILMN_1225565, ILMN_3125181, ILMN_2717613, ILMN_2466845, ILMN_1248293, ILMN_2868220, ILMN_31…	1454	510	13588	1.48425	0.575956	0.0141969	0.480653
GOTERM_BP_FAT	GO:0051173~positive regulation of nitrogen compound metabolic process	83	4.02913	0.00027333	ILMN_1254639, ILMN_2792089, ILMN_2599858, ILMN_2659132, ILMN_3109289, ILMN_2697060, ILMN_2745540, ILMN_2495939, ILMN_2705324, ILMN_1248852, ILMN_2945275, ILMN_2768330, ILMN_3121255, ILMN_1214110, ILMN_2592476, ILMN_2638721, ILMN_3155789, ILMN_2742455, ILMN_2628522, ILMN_2783429, ILMN_1228414, ILMN_2770759, ILMN_1225565, ILMN_3125181, ILMN_2717613, ILMN_1238221, ILMN_2466845, ILMN_1248293, ILMN_28…	1454	526	13588	1.47463	0.586789	0.014384	0.495115
GOTERM_BP_FAT	GO:0010628~positive regulation of gene expression	78	3.78641	0.000286192	ILMN_1254639, ILMN_2792089, ILMN_2599858, ILMN_2659132, ILMN_3109289, ILMN_2697060, ILMN_2745540, ILMN_2495939, ILMN_2705324, ILMN_1248852, ILMN_2945275, ILMN_2648973, ILMN_2768330, ILMN_3121255, ILMN_2592476, ILMN_2638721, ILMN_3155789, ILMN_2742455, ILMN_2628522, ILMN_2783429, ILMN_1228414, ILMN_1225565, ILMN_2770759, ILMN_3125181, ILMN_2717613, ILMN_2466845, ILMN_1248293, ILMN_2868220, ILMN_31…	1454	488	13588	1.49371	0.603623	0.0148148	0.518357
GOTERM_BP_FAT	GO:0045941~positive regulation of transcription	76	3.68932	0.000334733	ILMN_1254639, ILMN_2792089, ILMN_2599858, ILMN_2659132, ILMN_3109289, ILMN_2697060, ILMN_2745540, ILMN_2495939, ILMN_2705324, ILMN_1248852, ILMN_2945275, ILMN_2768330, ILMN_3121255, ILMN_2592476, ILMN_2638721, ILMN_3155789, ILMN_2742455, ILMN_2628522, ILMN_2783429, ILMN_1228414, ILMN_1225565, ILMN_2770759, ILMN_3125181, ILMN_2717613, ILMN_2466845, ILMN_1248293, ILMN_2868220, ILMN_3154640, ILMN_28…	1454	475	13588	1.49524	0.661209	0.0167699	0.606023
GOTERM_BP_FAT	GO:0010557~positive regulation of macromolecule biosynthetic process	82	3.98058	0.000558991	ILMN_1254639, ILMN_2792089, ILMN_2599858, ILMN_2659132, ILMN_3109289, ILMN_2697060, ILMN_2745540, ILMN_2715215, ILMN_2495939, ILMN_2705324, ILMN_1248852, ILMN_2945275, ILMN_2768330, ILMN_3121255, ILMN_2678828, ILMN_2592476, ILMN_2805945, ILMN_2638721, ILMN_3155789, ILMN_2742455, ILMN_2628522, ILMN_2783429, ILMN_1228414, ILMN_2770759, ILMN_1225565, ILMN_3125181, ILMN_2717613, ILMN_2466845, ILMN_12…	1454	530	13588	1.44587	0.835973	0.0266202	1.01009
GOTERM_BP_FAT	GO:0031328~positive regulation of cellular biosynthetic process	84	4.07767	0.000791893	ILMN_1254639, ILMN_2792089, ILMN_2599858, ILMN_2659132, ILMN_3109289, ILMN_2697060, ILMN_2745540, ILMN_2715215, ILMN_2495939, ILMN_2705324, ILMN_1248852, ILMN_2945275, ILMN_2768330, ILMN_3121255, ILMN_2678828, ILMN_2592476, ILMN_2805945, ILMN_2638721, ILMN_3155789, ILMN_2742455, ILMN_2628522, ILMN_2783429, ILMN_1228414, ILMN_2770759, ILMN_1225565, ILMN_3125181, ILMN_2717613, ILMN_1238221, ILMN_24…	1454	552	13588	1.4221	0.922788	0.0364385	1.42809
GOTERM_BP_FAT	GO:0009891~positive regulation of biosynthetic process	84	4.07767	0.00104254	ILMN_1254639, ILMN_2792089, ILMN_2599858, ILMN_2659132, ILMN_3109289, ILMN_2697060, ILMN_2745540, ILMN_2715215, ILMN_2495939, ILMN_2705324, ILMN_1248852, ILMN_2945275, ILMN_2768330, ILMN_3121255, ILMN_2678828, ILMN_2592476, ILMN_2805945, ILMN_2638721, ILMN_3155789, ILMN_2742455, ILMN_2628522, ILMN_2783429, ILMN_1228414, ILMN_2770759, ILMN_1225565, ILMN_3125181, ILMN_2717613, ILMN_1238221, ILMN_24…	1454	557	13588	1.40934	0.96569	0.0457576	1.87608
GOTERM_BP_FAT	GO:0045944~positive regulation of transcription from RNA polymerase II promoter	57	2.76699	0.0022373	ILMN_1254639, ILMN_2792089, ILMN_2599858, ILMN_2659132, ILMN_3109289, ILMN_2745540, ILMN_2705324, ILMN_1248852, ILMN_2945275, ILMN_2768330, ILMN_3121255, ILMN_2592476, ILMN_3155789, ILMN_2638721, ILMN_2628522, ILMN_1228414, ILMN_1225565, ILMN_3125181, ILMN_2466845, ILMN_1248293, ILMN_2868220, ILMN_2852034, ILMN_2736611, ILMN_2986978, ILMN_2837476, ILMN_2938893, ILMN_1243885, ILMN_1212894, ILMN_26…	1454	358	13588	1.48793	0.999284	0.0855191	3.98517
GOTERM_BP_FAT	GO:0051252~regulation of RNA metabolic process	163	7.91262	0.42313	ILMN_1254639, ILMN_2599858, ILMN_3109289, ILMN_2659132, ILMN_2495939, ILMN_1242264, ILMN_1228497, ILMN_2745540, ILMN_2820260, ILMN_1253593, ILMN_1248852, ILMN_2623793, ILMN_1215135, ILMN_3055904, ILMN_1232386, ILMN_2655694, ILMN_1232182, ILMN_2592476, ILMN_2652394, ILMN_2705367, ILMN_2652187, ILMN_1228414, ILMN_1225565, ILMN_2903484, ILMN_2653251, ILMN_1246873, ILMN_2698282, ILMN_3125181, ILMN_26…	1454	1488	13588	1.02371	1	0.986799	99.9954
GOTERM_BP_FAT	GO:0006355~regulation of transcription, DNA-dependent	159	7.71845	0.477448	ILMN_1254639, ILMN_2599858, ILMN_3109289, ILMN_2659132, ILMN_2495939, ILMN_1242264, ILMN_1228497, ILMN_2745540, ILMN_2820260, ILMN_1253593, ILMN_1248852, ILMN_2623793, ILMN_1215135, ILMN_3055904, ILMN_1232386, ILMN_2655694, ILMN_1232182, ILMN_2592476, ILMN_2652394, ILMN_2705367, ILMN_2652187, ILMN_1228414, ILMN_1225565, ILMN_2903484, ILMN_2653251, ILMN_1246873, ILMN_3125181, ILMN_2667889, ILMN_29…	1454	1465	13588	1.01426	1	0.991784	99.9992
Annotation Cluster 20	Enrichment Score: 3.17423336343757
Category	Term	Count	%	PValue	Genes	List Total	Pop Hits	Pop Total	Fold Enrichment	Bonferroni	Benjamini	FDR
INTERPRO	IPR017907:Zinc finger, RING-type, conserved site	47	2.28155	0.000181923	ILMN_2673601, ILMN_2598990, ILMN_2472444, ILMN_1214110, ILMN_2758632, ILMN_2758631, ILMN_2651706, ILMN_1240074, ILMN_2655034, ILMN_2606015, ILMN_3021465, ILMN_2944546, ILMN_2427178, ILMN_3134607, ILMN_2614080, ILMN_2682811, ILMN_2942314, ILMN_2761459, ILMN_2850753, ILMN_1251165, ILMN_3117714, ILMN_2789888, ILMN_2903529, ILMN_2933834, ILMN_2635377, ILMN_2604922, ILMN_2932539, ILMN_1251074, ILMN_12…	1876	254	17763	1.75205	0.350741	0.0827588	0.318564
INTERPRO	IPR018957:Zinc finger, C3HC4 RING-type	41	1.99029	0.000388154	ILMN_2673601, ILMN_2598990, ILMN_2472444, ILMN_1214110, ILMN_2758632, ILMN_2758631, ILMN_2651706, ILMN_1240074, ILMN_2655034, ILMN_2606015, ILMN_2944546, ILMN_2427178, ILMN_3134607, ILMN_2614080, ILMN_2682811, ILMN_2942314, ILMN_1230583, ILMN_1251165, ILMN_3117714, ILMN_2789888, ILMN_2903529, ILMN_2933834, ILMN_2635377, ILMN_2932539, ILMN_1216416, ILMN_2990616, ILMN_1224117, ILMN_2602597, ILMN_12…	1876	219	17763	1.77265	0.60214	0.0973372	0.678536
SMART	SM00184:RING	49	2.37864	0.000651329	ILMN_2673601, ILMN_2598990, ILMN_2472444, ILMN_1214110, ILMN_2758632, ILMN_2651706, ILMN_2758631, ILMN_1240074, ILMN_2697652, ILMN_2655034, ILMN_2606015, ILMN_3021465, ILMN_2944546, ILMN_3134607, ILMN_2427178, ILMN_2614080, ILMN_2682811, ILMN_2942314, ILMN_2761459, ILMN_2850753, ILMN_1230583, ILMN_1251165, ILMN_3117714, ILMN_2789888, ILMN_2903529, ILMN_2933834, ILMN_2635377, ILMN_2604922, ILMN_29…	960	286	9131	1.62959	0.204944	0.0735984	0.887888
INTERPRO	IPR001841:Zinc finger, RING-type	49	2.37864	0.000801065	ILMN_2673601, ILMN_2598990, ILMN_2472444, ILMN_1214110, ILMN_2758632, ILMN_2651706, ILMN_2758631, ILMN_1240074, ILMN_2697652, ILMN_2655034, ILMN_2606015, ILMN_3021465, ILMN_2944546, ILMN_3134607, ILMN_2427178, ILMN_2614080, ILMN_2682811, ILMN_2942314, ILMN_2761459, ILMN_2850753, ILMN_1230583, ILMN_1251165, ILMN_3117714, ILMN_2789888, ILMN_2903529, ILMN_2933834, ILMN_2635377, ILMN_2604922, ILMN_29…	1876	286	17763	1.62223	0.850803	0.158823	1.39558
UP_SEQ_FEATURE	zinc finger region:RING-type	35	1.69903	0.00365153	ILMN_1251074, ILMN_3124547, ILMN_2598990, ILMN_2673601, ILMN_2990616, ILMN_2472444, ILMN_1224117, ILMN_1214110, ILMN_2602597, ILMN_2758632, ILMN_2758631, ILMN_3144289, ILMN_1240074, ILMN_2655034, ILMN_2651534, ILMN_3046362, ILMN_3021465, ILMN_2606130, ILMN_3134607, ILMN_1240883, ILMN_2960750, ILMN_2622735, ILMN_2779913, ILMN_1250774, ILMN_2761459, ILMN_2442075, ILMN_2850753, ILMN_3161066, ILMN_12…	1937	176	16021	1.64481	1	0.738651	6.57825
Annotation Cluster 21	Enrichment Score: 3.1294801007977116
Category	Term	Count	%	PValue	Genes	List Total	Pop Hits	Pop Total	Fold Enrichment	Bonferroni	Benjamini	FDR
GOTERM_MF_FAT	GO:0008134~transcription factor binding	52	2.52427	0.000102388	ILMN_2733514, ILMN_2659132, ILMN_2697060, ILMN_2820260, ILMN_2495939, ILMN_2705324, ILMN_1233838, ILMN_2704509, ILMN_2808336, ILMN_2711410, ILMN_2697652, ILMN_2740523, ILMN_2783429, ILMN_1228414, ILMN_3116330, ILMN_2614912, ILMN_2950286, ILMN_1213290, ILMN_3085126, ILMN_1248293, ILMN_2877464, ILMN_2652575, ILMN_2439341, ILMN_2491301, ILMN_1228568, ILMN_2652572, ILMN_2659160, ILMN_1229545, ILMN_29…	1385	288	13288	1.73229	0.104323	0.00645992	0.163155
GOTERM_MF_FAT	GO:0003712~transcription cofactor activity	36	1.74757	0.000196509	ILMN_2733514, ILMN_1255644, ILMN_2659132, ILMN_2820260, ILMN_2495939, ILMN_2705969, ILMN_2705324, ILMN_3163539, ILMN_2684455, ILMN_2839973, ILMN_2808336, ILMN_2728802, ILMN_2711410, ILMN_2740523, ILMN_3116330, ILMN_3003076, ILMN_3151510, ILMN_2791952, ILMN_2749937, ILMN_2950286, ILMN_1213290, ILMN_2768755, ILMN_1248293, ILMN_2877464, ILMN_2652575, ILMN_2491301, ILMN_1228568, ILMN_2652572, ILMN_28…	1385	180	13288	1.91884	0.190602	0.0116793	0.312917
GOTERM_MF_FAT	GO:0003713~transcription coactivator activity	23	1.1165	0.000518147	ILMN_2659132, ILMN_2495939, ILMN_2705969, ILMN_2820260, ILMN_3163539, ILMN_2684455, ILMN_2839973, ILMN_2728802, ILMN_2711410, ILMN_3116330, ILMN_3003076, ILMN_3151510, ILMN_2749937, ILMN_1248293, ILMN_2877464, ILMN_2652575, ILMN_2491301, ILMN_2837888, ILMN_2652572, ILMN_2723907, ILMN_1229545, ILMN_1215305, ILMN_2719784, ILMN_2669540, ILMN_1227225, ILMN_2932539	1385	100	13288	2.20667	0.427459	0.0250301	0.823106
GOTERM_MF_FAT	GO:0016563~transcription activator activity	38	1.84466	0.029107	ILMN_2659132, ILMN_1218384, ILMN_2820260, ILMN_2745540, ILMN_2495939, ILMN_2705969, ILMN_2886828, ILMN_3163539, ILMN_2684455, ILMN_2839973, ILMN_2728802, ILMN_2711410, ILMN_2742455, ILMN_1228414, ILMN_3116330, ILMN_2663367, ILMN_3003076, ILMN_3151510, ILMN_2992232, ILMN_2749937, ILMN_1248293, ILMN_2877464, ILMN_1249360, ILMN_3154640, ILMN_2652575, ILMN_2780759, ILMN_2491301, ILMN_2652572, ILMN_28…	1385	259	13288	1.40765	1	0.438919	37.5662
Annotation Cluster 22	Enrichment Score: 3.034435612915699
Category	Term	Count	%	PValue	Genes	List Total	Pop Hits	Pop Total	Fold Enrichment	Bonferroni	Benjamini	FDR
GOTERM_BP_FAT	GO:0022613~ribonucleoprotein complex biogenesis	36	1.74757	6.59585e-07	ILMN_2720334, ILMN_3006534, ILMN_2942492, ILMN_2668001, ILMN_3020829, ILMN_2712642, ILMN_2893077, ILMN_1236796, ILMN_2853744, ILMN_2884968, ILMN_2688383, ILMN_2972325, ILMN_2920800, ILMN_1249624, ILMN_2698282, ILMN_2996667, ILMN_2774163, ILMN_2741726, ILMN_2631813, ILMN_2616786, ILMN_1224534, ILMN_1245860, ILMN_1251876, ILMN_2822621, ILMN_2965417, ILMN_2715289, ILMN_3047301, ILMN_1216072, ILMN_12…	1454	137	13588	2.45569	0.00213017	8.88477e-05	0.00119758
GOTERM_BP_FAT	GO:0042254~ribosome biogenesis	27	1.31068	0.000101803	ILMN_2720334, ILMN_3006534, ILMN_2668001, ILMN_3020829, ILMN_2712642, ILMN_2893077, ILMN_2884968, ILMN_2688383, ILMN_2853744, ILMN_2972325, ILMN_1249624, ILMN_2996667, ILMN_2616786, ILMN_1224534, ILMN_1245860, ILMN_2822621, ILMN_2965417, ILMN_2715289, ILMN_3047301, ILMN_1216072, ILMN_1242419, ILMN_1245650, ILMN_3066222, ILMN_1251056, ILMN_2755730, ILMN_1235979, ILMN_2737092, ILMN_1258846, ILMN_31…	1454	112	13588	2.25287	0.280461	0.00656128	0.184679
SP_PIR_KEYWORDS	ribosome biogenesis	12	0.582524	0.00777272	ILMN_1245860, ILMN_3006534, ILMN_2668001, ILMN_1216072, ILMN_1245650, ILMN_2884968, ILMN_2853744, ILMN_3066222, ILMN_2755730, ILMN_1235979, ILMN_2737092, ILMN_1258846, ILMN_3144358, ILMN_2996667	1951	45	17854	2.44032	0.979631	0.0649296	10.6256
GOTERM_BP_FAT	GO:0016072~rRNA metabolic process	15	0.728155	0.0263994	ILMN_2616786, ILMN_2720334, ILMN_1224534, ILMN_2965417, ILMN_2715289, ILMN_3020829, ILMN_2712642, ILMN_1242419, ILMN_2893077, ILMN_2688383, ILMN_3066222, ILMN_1251056, ILMN_2737092, ILMN_1249624, ILMN_1258846, ILMN_3144358, ILMN_2738554, ILMN_1215147	1454	75	13588	1.86905	1	0.468132	38.4775
GOTERM_BP_FAT	GO:0006364~rRNA processing	14	0.679612	0.048823	ILMN_2616786, ILMN_2720334, ILMN_1224534, ILMN_2965417, ILMN_2715289, ILMN_3020829, ILMN_2712642, ILMN_1242419, ILMN_2893077, ILMN_2688383, ILMN_1251056, ILMN_2737092, ILMN_1249624, ILMN_1258846, ILMN_2738554, ILMN_1215147	1454	74	13588	1.76802	1	0.603362	59.7007
Annotation Cluster 23	Enrichment Score: 2.883203416182983
Category	Term	Count	%	PValue	Genes	List Total	Pop Hits	Pop Total	Fold Enrichment	Bonferroni	Benjamini	FDR
SP_PIR_KEYWORDS	rna-binding	94	4.56311	3.81079e-08	ILMN_1234672, ILMN_1253012, ILMN_2748091, ILMN_2970691, ILMN_1256671, ILMN_1243711, ILMN_2670415, ILMN_2698282, ILMN_3142235, ILMN_2971946, ILMN_2741726, ILMN_2970685, ILMN_1249708, ILMN_2593993, ILMN_2904641, ILMN_2968032, ILMN_2709456, ILMN_2857086, ILMN_2734624, ILMN_2759669, ILMN_1216883, ILMN_1251056, ILMN_2722778, ILMN_2688923, ILMN_2774825, ILMN_1243395, ILMN_2941033, ILMN_2511051, ILMN_31…	1951	485	17854	1.77364	1.90157e-05	1.35827e-06	5.48615e-05
INTERPRO	IPR012677:Nucleotide-binding, alpha-beta plait	41	1.99029	0.000214196	ILMN_1243395, ILMN_2684987, ILMN_3061923, ILMN_2911936, ILMN_1253012, ILMN_2945275, ILMN_2511051, ILMN_2970691, ILMN_1256671, ILMN_2942492, ILMN_1218934, ILMN_2667509, ILMN_2684494, ILMN_1236631, ILMN_1232593, ILMN_3111877, ILMN_3123120, ILMN_2626309, ILMN_3114413, ILMN_2650732, ILMN_3099398, ILMN_2698282, ILMN_3142235, ILMN_2970685, ILMN_2826342, ILMN_3094608, ILMN_3093089, ILMN_2627690, ILMN_25…	1876	213	17763	1.82258	0.398637	0.0812666	0.374977
SMART	SM00360:RRM	40	1.94175	0.000327418	ILMN_1243395, ILMN_2684987, ILMN_3061923, ILMN_2911936, ILMN_1253012, ILMN_2945275, ILMN_2511051, ILMN_2970691, ILMN_1256671, ILMN_2942492, ILMN_1218934, ILMN_2667509, ILMN_2684494, ILMN_1232593, ILMN_3111877, ILMN_3123120, ILMN_2626309, ILMN_3114413, ILMN_2650732, ILMN_3099398, ILMN_2698282, ILMN_3142235, ILMN_2970685, ILMN_2826342, ILMN_3094608, ILMN_3093089, ILMN_2627690, ILMN_2591626, ILMN_27…	960	212	9131	1.79461	0.108875	0.0560056	0.447253
INTERPRO	IPR000504:RNA recognition motif, RNP-1	40	1.94175	0.000393205	ILMN_1243395, ILMN_2684987, ILMN_3061923, ILMN_2911936, ILMN_1253012, ILMN_2945275, ILMN_2511051, ILMN_2970691, ILMN_1256671, ILMN_2942492, ILMN_1218934, ILMN_2667509, ILMN_2684494, ILMN_1232593, ILMN_3111877, ILMN_3123120, ILMN_2626309, ILMN_3114413, ILMN_2650732, ILMN_3099398, ILMN_2698282, ILMN_3142235, ILMN_2970685, ILMN_2826342, ILMN_3094608, ILMN_3093089, ILMN_2627690, ILMN_2591626, ILMN_27…	1876	212	17763	1.78652	0.606885	0.0891393	0.687338
UP_SEQ_FEATURE	domain:RRM	20	0.970874	0.0269105	ILMN_1243395, ILMN_2970685, ILMN_2826342, ILMN_3094608, ILMN_1253012, ILMN_2511051, ILMN_2970691, ILMN_1218934, ILMN_2709456, ILMN_2684494, ILMN_2636443, ILMN_1235470, ILMN_2857086, ILMN_1232593, ILMN_2690873, ILMN_3123120, ILMN_2626309, ILMN_2756286, ILMN_3114413, ILMN_2636335, ILMN_3099398, ILMN_2698282, ILMN_2774825	1937	99	16021	1.67092	1	0.98981	39.7952
UP_SEQ_FEATURE	domain:RRM 2	18	0.873786	0.0330649	ILMN_2684987, ILMN_3061923, ILMN_3093089, ILMN_2911936, ILMN_2627690, ILMN_2591626, ILMN_2739675, ILMN_1256671, ILMN_3140788, ILMN_2942492, ILMN_2667509, ILMN_2829171, ILMN_2944150, ILMN_1221266, ILMN_2974720, ILMN_2592059, ILMN_2852756, ILMN_3111877, ILMN_1216883, ILMN_2688923, ILMN_3142235	1937	88	16021	1.6918	1	0.987431	46.4971
UP_SEQ_FEATURE	domain:RRM 1	18	0.873786	0.0330649	ILMN_2684987, ILMN_3061923, ILMN_3093089, ILMN_2911936, ILMN_2627690, ILMN_2591626, ILMN_2739675, ILMN_1256671, ILMN_3140788, ILMN_2942492, ILMN_2667509, ILMN_2829171, ILMN_2944150, ILMN_1221266, ILMN_2974720, ILMN_2592059, ILMN_2852756, ILMN_3111877, ILMN_1216883, ILMN_2688923, ILMN_3142235	1937	88	16021	1.6918	1	0.987431	46.4971
UP_SEQ_FEATURE	domain:RRM 3	8	0.38835	0.278079	ILMN_2684987, ILMN_1221266, ILMN_2592059, ILMN_2911936, ILMN_2627690, ILMN_1216883, ILMN_3140788, ILMN_1256671, ILMN_2688923, ILMN_2829171	1937	44	16021	1.50383	1	0.999999	99.7668
Annotation Cluster 24	Enrichment Score: 2.8378953496499073
Category	Term	Count	%	PValue	Genes	List Total	Pop Hits	Pop Total	Fold Enrichment	Bonferroni	Benjamini	FDR
GOTERM_BP_FAT	GO:0006913~nucleocytoplasmic transport	24	1.16505	0.000151742	ILMN_1222803, ILMN_2764995, ILMN_1239569, ILMN_2709901, ILMN_1214394, ILMN_2722184, ILMN_1223793, ILMN_2594971, ILMN_2617265, ILMN_2698282, ILMN_2670415, ILMN_2654013, ILMN_3162184, ILMN_2466845, ILMN_2872599, ILMN_2971286, ILMN_2923599, ILMN_3135931, ILMN_2748839, ILMN_2677092, ILMN_2464553, ILMN_1251572, ILMN_1235979, ILMN_3135566, ILMN_2968807, ILMN_1245579	1454	96	13588	2.33631	0.387753	0.00957387	0.275156
GOTERM_BP_FAT	GO:0051169~nuclear transport	24	1.16505	0.000210764	ILMN_1222803, ILMN_2764995, ILMN_1239569, ILMN_2709901, ILMN_1214394, ILMN_2722184, ILMN_1223793, ILMN_2594971, ILMN_2617265, ILMN_2698282, ILMN_2670415, ILMN_2654013, ILMN_3162184, ILMN_2466845, ILMN_2872599, ILMN_2971286, ILMN_2923599, ILMN_3135931, ILMN_2748839, ILMN_2677092, ILMN_2464553, ILMN_1251572, ILMN_1235979, ILMN_3135566, ILMN_2968807, ILMN_1245579	1454	98	13588	2.28863	0.494128	0.0120954	0.381986
GOTERM_BP_FAT	GO:0034504~protein localization in nucleus	17	0.825243	0.000510032	ILMN_2764995, ILMN_2466845, ILMN_2971286, ILMN_2923599, ILMN_3135931, ILMN_1214394, ILMN_2615448, ILMN_2677092, ILMN_2464553, ILMN_2594971, ILMN_1251572, ILMN_1235979, ILMN_2617265, ILMN_2953411, ILMN_2670415, ILMN_3135566, ILMN_1245579, ILMN_2968807	1454	61	13588	2.60442	0.807826	0.0246805	0.922009
GOTERM_BP_FAT	GO:0006606~protein import into nucleus	15	0.728155	0.00185217	ILMN_2764995, ILMN_2466845, ILMN_2971286, ILMN_2923599, ILMN_3135931, ILMN_1214394, ILMN_2677092, ILMN_2464553, ILMN_2594971, ILMN_1251572, ILMN_1235979, ILMN_2617265, ILMN_2670415, ILMN_3135566, ILMN_1245579, ILMN_2968807	1454	56	13588	2.50319	0.997505	0.0739632	3.31003
GOTERM_BP_FAT	GO:0051170~nuclear import	15	0.728155	0.00264182	ILMN_2764995, ILMN_2466845, ILMN_2971286, ILMN_2923599, ILMN_3135931, ILMN_1214394, ILMN_2677092, ILMN_2464553, ILMN_2594971, ILMN_1251572, ILMN_1235979, ILMN_2617265, ILMN_2670415, ILMN_3135566, ILMN_1245579, ILMN_2968807	1454	58	13588	2.41688	0.999807	0.0990419	4.68951
GOTERM_BP_FAT	GO:0017038~protein import	18	0.873786	0.00540979	ILMN_2764995, ILMN_2466845, ILMN_2971286, ILMN_2923599, ILMN_3135931, ILMN_1214394, ILMN_2641449, ILMN_2972149, ILMN_2626653, ILMN_2677092, ILMN_2464553, ILMN_2594971, ILMN_1235979, ILMN_1251572, ILMN_2617265, ILMN_2670415, ILMN_3135566, ILMN_1245579, ILMN_2968807	1454	82	13588	2.0514	1	0.175286	9.37959
GOTERM_BP_FAT	GO:0033365~protein localization in organelle	20	0.970874	0.00647378	ILMN_2764995, ILMN_2466845, ILMN_2971286, ILMN_2923599, ILMN_3135931, ILMN_1214394, ILMN_2641449, ILMN_2615448, ILMN_2972149, ILMN_2626653, ILMN_2677092, ILMN_2464553, ILMN_2594971, ILMN_1235979, ILMN_1251572, ILMN_2617265, ILMN_2953411, ILMN_2670415, ILMN_3135566, ILMN_1245579, ILMN_2968807	1454	97	13588	1.92686	1	0.202108	11.1237
GOTERM_BP_FAT	GO:0006605~protein targeting	25	1.21359	0.00708622	ILMN_2764995, ILMN_1226978, ILMN_1222803, ILMN_2709901, ILMN_1214394, ILMN_2641449, ILMN_2972149, ILMN_2626653, ILMN_2594971, ILMN_2617265, ILMN_2670415, ILMN_2466845, ILMN_1244874, ILMN_2788475, ILMN_2971286, ILMN_3135931, ILMN_2923599, ILMN_2838645, ILMN_2464553, ILMN_2677092, ILMN_1235979, ILMN_1251572, ILMN_2706232, ILMN_3135566, ILMN_1253348, ILMN_2968807, ILMN_1245579	1454	133	13588	1.75663	1	0.214955	12.1132
Annotation Cluster 25	Enrichment Score: 2.8208710568426065
Category	Term	Count	%	PValue	Genes	List Total	Pop Hits	Pop Total	Fold Enrichment	Bonferroni	Benjamini	FDR
SP_PIR_KEYWORDS	methyltransferase	34	1.65049	1.96828e-05	ILMN_2715234, ILMN_3147724, ILMN_2948712, ILMN_2809988, ILMN_1250081, ILMN_1214110, ILMN_3007271, ILMN_2808355, ILMN_1247099, ILMN_1252310, ILMN_2705367, ILMN_2996601, ILMN_2688383, ILMN_2478874, ILMN_2747677, ILMN_1235697, ILMN_2651534, ILMN_3003076, ILMN_2943477, ILMN_2818206, ILMN_2943476, ILMN_1252719, ILMN_1218263, ILMN_2666272, ILMN_1243875, ILMN_2603660, ILMN_2649654, ILMN_2893471, ILMN_25…	1951	142	17854	2.19113	0.00977374	0.000350718	0.0283323
UP_SEQ_FEATURE	binding site:S-adenosyl-L-methionine	13	0.631068	0.00319299	ILMN_3147724, ILMN_2948712, ILMN_1219921, ILMN_1214110, ILMN_3007271, ILMN_2720763, ILMN_2699833, ILMN_2705367, ILMN_2688383, ILMN_1251534, ILMN_2651534, ILMN_3001076, ILMN_2759335, ILMN_3003076, ILMN_1215147	1937	42	16021	2.56008	0.999998	0.724848	5.77527
SP_PIR_KEYWORDS	s-adenosyl-l-methionine	19	0.92233	0.00622673	ILMN_2715234, ILMN_3147724, ILMN_2820297, ILMN_2948712, ILMN_1219921, ILMN_2591823, ILMN_1214110, ILMN_3007271, ILMN_1260420, ILMN_1252310, ILMN_2699833, ILMN_2705367, ILMN_2996601, ILMN_2688383, ILMN_3001076, ILMN_2651534, ILMN_1251534, ILMN_2719460, ILMN_2759335, ILMN_3003076, ILMN_1218263, ILMN_1243875, ILMN_1246873	1951	88	17854	1.97583	0.955704	0.0532135	8.5998
GOTERM_MF_FAT	GO:0008170~N-methyltransferase activity	11	0.533981	0.0133037	ILMN_3147724, ILMN_3007271, ILMN_1260420, ILMN_2699833, ILMN_2705367, ILMN_2996601, ILMN_2719460, ILMN_3001076, ILMN_2759335, ILMN_3003076, ILMN_1218263, ILMN_1243875, ILMN_2603660	1385	44	13288	2.39856	0.999999	0.284759	19.2312
Annotation Cluster 26	Enrichment Score: 2.7851582701848523
Category	Term	Count	%	PValue	Genes	List Total	Pop Hits	Pop Total	Fold Enrichment	Bonferroni	Benjamini	FDR
GOTERM_MF_FAT	GO:0016455~RNA polymerase II transcription mediator activity	9	0.436893	0.00113774	ILMN_2672208, ILMN_3000536, ILMN_2655694, ILMN_2873729, ILMN_2622146, ILMN_2820098, ILMN_2723907, ILMN_2497094, ILMN_1217567	1385	22	13288	3.92491	0.706214	0.0478152	1.79903
GOTERM_CC_FAT	GO:0016592~Srb-mediator complex	10	0.485437	0.00142744	ILMN_2818189, ILMN_2672208, ILMN_3000536, ILMN_2655694, ILMN_2873729, ILMN_2622146, ILMN_2820098, ILMN_2723907, ILMN_2497094, ILMN_1217567	1289	28	12504	3.46448	0.527606	0.018125	2.04985
GOTERM_MF_FAT	GO:0003702~RNA polymerase II transcription factor activity	22	1.06796	0.00168397	ILMN_2997308, ILMN_3000536, ILMN_2672208, ILMN_2749847, ILMN_2869461, ILMN_2655694, ILMN_1247147, ILMN_1252302, ILMN_2736611, ILMN_2780759, ILMN_2762745, ILMN_2723907, ILMN_2995129, ILMN_2742455, ILMN_1213872, ILMN_2946281, ILMN_1252078, ILMN_2873729, ILMN_2622146, ILMN_2820098, ILMN_2497094, ILMN_1217567	1385	102	13288	2.06934	0.836914	0.0673722	2.65192
GOTERM_MF_FAT	GO:0016251~general RNA polymerase II transcription factor activity	10	0.485437	0.00264504	ILMN_2672208, ILMN_3000536, ILMN_2655694, ILMN_2736611, ILMN_2873729, ILMN_2622146, ILMN_2820098, ILMN_2723907, ILMN_2497094, ILMN_1217567	1385	30	13288	3.19807	0.942146	0.093596	4.13573
Annotation Cluster 27	Enrichment Score: 2.6831665539130607
Category	Term	Count	%	PValue	Genes	List Total	Pop Hits	Pop Total	Fold Enrichment	Bonferroni	Benjamini	FDR
GOTERM_MF_FAT	GO:0046914~transition metal ion binding	330	16.0194	3.43331e-05	ILMN_2471268, ILMN_2590779, ILMN_2729197, ILMN_1228497, ILMN_2623793, ILMN_2945238, ILMN_1247404, ILMN_2990220, ILMN_2727893, ILMN_1243711, ILMN_2736539, ILMN_1216919, ILMN_1240074, ILMN_2697652, ILMN_2761082, ILMN_2705367, ILMN_3021465, ILMN_2776910, ILMN_2855397, ILMN_2776911, ILMN_1219447, ILMN_2957589, ILMN_2464898, ILMN_1251771, ILMN_2971744, ILMN_3131197, ILMN_1241892, ILMN_2864798, ILMN_28…	1385	2608	13288	1.21399	0.036269	0.00263531	0.0547376
SP_PIR_KEYWORDS	zinc-finger	174	8.4466	7.61696e-05	ILMN_2471268, ILMN_1228497, ILMN_2729197, ILMN_2623793, ILMN_2945238, ILMN_2990220, ILMN_2697652, ILMN_1240074, ILMN_3021465, ILMN_2855397, ILMN_1219447, ILMN_2957589, ILMN_2971744, ILMN_3131197, ILMN_2864798, ILMN_1251165, ILMN_2889916, ILMN_2789888, ILMN_2642313, ILMN_2722778, ILMN_3131909, ILMN_2694153, ILMN_1230912, ILMN_2932539, ILMN_2964608, ILMN_2936604, ILMN_2886828, ILMN_2990616, ILMN_28…	1951	1204	17854	1.32252	0.0372968	0.00118711	0.109601
GOTERM_MF_FAT	GO:0008270~zinc ion binding	266	12.9126	0.00028945	ILMN_2471268, ILMN_2729197, ILMN_1228497, ILMN_2623793, ILMN_2945238, ILMN_1247404, ILMN_2990220, ILMN_1243711, ILMN_1216919, ILMN_2761082, ILMN_2697652, ILMN_1240074, ILMN_2705367, ILMN_3021465, ILMN_2776910, ILMN_2855397, ILMN_2776911, ILMN_1219447, ILMN_2957589, ILMN_2464898, ILMN_2971744, ILMN_3131197, ILMN_1241892, ILMN_2864798, ILMN_2881039, ILMN_2859678, ILMN_2889916, ILMN_1251165, ILMN_24…	1385	2105	13288	1.21238	0.267647	0.015454	0.460594
SP_PIR_KEYWORDS	zinc	243	11.7961	0.00327339	ILMN_2471268, ILMN_2729197, ILMN_1228497, ILMN_2945238, ILMN_2623793, ILMN_2990220, ILMN_1243711, ILMN_2761082, ILMN_2697652, ILMN_1240074, ILMN_2705367, ILMN_3021465, ILMN_2776910, ILMN_2855397, ILMN_2776911, ILMN_1219447, ILMN_2957589, ILMN_2464898, ILMN_2971744, ILMN_3131197, ILMN_1241892, ILMN_2864798, ILMN_2881039, ILMN_2859678, ILMN_2889916, ILMN_1251165, ILMN_2471634, ILMN_3121578, ILMN_24…	1951	1886	17854	1.17908	0.805262	0.0315713	4.61055
SP_PIR_KEYWORDS	metal-binding	333	16.165	0.00512754	ILMN_2471268, ILMN_2590779, ILMN_2729197, ILMN_1228497, ILMN_2623793, ILMN_2945238, ILMN_2990220, ILMN_2727893, ILMN_1243711, ILMN_2736539, ILMN_1240074, ILMN_2697652, ILMN_2761082, ILMN_2705367, ILMN_2868482, ILMN_3021465, ILMN_2776910, ILMN_2855397, ILMN_2776911, ILMN_1259356, ILMN_1219447, ILMN_2957589, ILMN_2464898, ILMN_1251771, ILMN_2971744, ILMN_2723920, ILMN_3131197, ILMN_3004142, ILMN_26…	1951	2682	17854	1.13622	0.923098	0.0455695	7.13356
GOTERM_MF_FAT	GO:0043169~cation binding	438	21.2621	0.023364	ILMN_2471268, ILMN_1228497, ILMN_2945238, ILMN_2990220, ILMN_2736539, ILMN_1240074, ILMN_2697652, ILMN_1216919, ILMN_3021465, ILMN_2776910, ILMN_2776911, ILMN_2953411, ILMN_1219447, ILMN_2957589, ILMN_2723920, ILMN_2971744, ILMN_3131197, ILMN_2864798, ILMN_2859678, ILMN_2881039, ILMN_2889916, ILMN_2632073, ILMN_3121578, ILMN_3146224, ILMN_2464217, ILMN_2829262, ILMN_2642313, ILMN_2607880, ILMN_27…	1385	3885	13288	1.08167	1	0.39876	31.4092
GOTERM_MF_FAT	GO:0046872~metal ion binding	434	21.068	0.0244871	ILMN_2471268, ILMN_1228497, ILMN_2945238, ILMN_2990220, ILMN_2736539, ILMN_1240074, ILMN_2697652, ILMN_1216919, ILMN_3021465, ILMN_2776910, ILMN_2776911, ILMN_2953411, ILMN_1219447, ILMN_2957589, ILMN_2723920, ILMN_2971744, ILMN_3131197, ILMN_2864798, ILMN_2859678, ILMN_2881039, ILMN_2889916, ILMN_2632073, ILMN_3121578, ILMN_3146224, ILMN_2464217, ILMN_2829262, ILMN_2642313, ILMN_2607880, ILMN_27…	1385	3850	13288	1.08153	1	0.407296	32.6563
GOTERM_MF_FAT	GO:0043167~ion binding	438	21.2621	0.0471204	ILMN_2471268, ILMN_1228497, ILMN_2945238, ILMN_2990220, ILMN_2736539, ILMN_1240074, ILMN_2697652, ILMN_1216919, ILMN_3021465, ILMN_2776910, ILMN_2776911, ILMN_2953411, ILMN_1219447, ILMN_2957589, ILMN_2723920, ILMN_2971744, ILMN_3131197, ILMN_2864798, ILMN_2859678, ILMN_2881039, ILMN_2889916, ILMN_2632073, ILMN_3121578, ILMN_3146224, ILMN_2464217, ILMN_2829262, ILMN_2642313, ILMN_2607880, ILMN_27…	1385	3934	13288	1.06819	1	0.550221	53.6856
Annotation Cluster 28	Enrichment Score: 2.675377529167849
Category	Term	Count	%	PValue	Genes	List Total	Pop Hits	Pop Total	Fold Enrichment	Bonferroni	Benjamini	FDR
SP_PIR_KEYWORDS	transcription regulation	230	11.165	5.04116e-07	ILMN_1254639, ILMN_2659132, ILMN_2729197, ILMN_1228497, ILMN_2749847, ILMN_1248852, ILMN_2945238, ILMN_2623793, ILMN_1232386, ILMN_2990220, ILMN_2606873, ILMN_2592476, ILMN_2697652, ILMN_2652394, ILMN_2474887, ILMN_2903484, ILMN_2653251, ILMN_2997308, ILMN_2971744, ILMN_3154810, ILMN_2869461, ILMN_2930707, ILMN_1251165, ILMN_2889916, ILMN_1260420, ILMN_2894751, ILMN_1229545, ILMN_2642313, ILMN_31…	1951	1546	17854	1.36143	0.000251522	1.39751e-05	0.000725741
GOTERM_BP_FAT	GO:0006350~transcription	251	12.1845	8.8645e-07	ILMN_1254639, ILMN_2659132, ILMN_2729197, ILMN_1228497, ILMN_2749847, ILMN_2623793, ILMN_1248852, ILMN_2945238, ILMN_1232386, ILMN_2990220, ILMN_2606873, ILMN_2592476, ILMN_2697652, ILMN_2652394, ILMN_2474887, ILMN_2903484, ILMN_2653251, ILMN_2997308, ILMN_2869461, ILMN_2930707, ILMN_2881039, ILMN_2889916, ILMN_2954824, ILMN_1251165, ILMN_1260420, ILMN_2894751, ILMN_2464217, ILMN_1229545, ILMN_26…	1454	1772	13588	1.32374	0.00286179	0.000106139	0.00160949
SP_PIR_KEYWORDS	Transcription	249	12.0874	1.16972e-05	ILMN_1254639, ILMN_2659132, ILMN_2729197, ILMN_1228497, ILMN_2749847, ILMN_2623793, ILMN_1248852, ILMN_2945238, ILMN_1232386, ILMN_2990220, ILMN_2606873, ILMN_2592476, ILMN_2697652, ILMN_2652394, ILMN_2474887, ILMN_2903484, ILMN_2653251, ILMN_2997308, ILMN_2971744, ILMN_3154810, ILMN_2869461, ILMN_2930707, ILMN_2881039, ILMN_2889916, ILMN_1251165, ILMN_1260420, ILMN_2894751, ILMN_2464217, ILMN_12…	1951	1769	17854	1.2881	0.00581996	0.000233451	0.0168385
GOTERM_BP_FAT	GO:0045449~regulation of transcription	291	14.1262	7.90127e-05	ILMN_1254639, ILMN_2659132, ILMN_2729197, ILMN_2820260, ILMN_1228497, ILMN_2749847, ILMN_2623793, ILMN_2945238, ILMN_1248852, ILMN_3055904, ILMN_1232386, ILMN_1213055, ILMN_2990220, ILMN_2606873, ILMN_2592476, ILMN_2697652, ILMN_2705367, ILMN_2652394, ILMN_2474887, ILMN_2783429, ILMN_2903484, ILMN_2653251, ILMN_3154810, ILMN_2997308, ILMN_2869461, ILMN_2930707, ILMN_2881039, ILMN_2889916, ILMN_12…	1454	2227	13588	1.22114	0.225438	0.00566077	0.143364
GOTERM_MF_FAT	GO:0003677~DNA binding	217	10.534	0.00705833	ILMN_1254639, ILMN_2659132, ILMN_2729197, ILMN_1228497, ILMN_2749847, ILMN_1248852, ILMN_2945238, ILMN_2623793, ILMN_1232386, ILMN_1238509, ILMN_2796353, ILMN_2592476, ILMN_2633333, ILMN_2697652, ILMN_2652394, ILMN_3021465, ILMN_2903484, ILMN_2653251, ILMN_2674228, ILMN_2683190, ILMN_2971744, ILMN_3154810, ILMN_3131197, ILMN_1230273, ILMN_2869461, ILMN_3102643, ILMN_2930707, ILMN_2889916, ILMN_31…	1385	1781	13288	1.16898	0.99951	0.18616	10.6813
GOTERM_MF_FAT	GO:0030528~transcription regulator activity	150	7.28155	0.0125883	ILMN_1254639, ILMN_2599858, ILMN_3109289, ILMN_2659132, ILMN_2495939, ILMN_1242264, ILMN_1228497, ILMN_2745540, ILMN_2820260, ILMN_1253593, ILMN_2749847, ILMN_1248852, ILMN_2623793, ILMN_1215135, ILMN_3055904, ILMN_1232386, ILMN_1213055, ILMN_2655694, ILMN_2592476, ILMN_2711410, ILMN_2652394, ILMN_2652187, ILMN_1228414, ILMN_3116330, ILMN_2903484, ILMN_2653251, ILMN_2667889, ILMN_2997308, ILMN_12…	1385	1206	13288	1.19331	0.999999	0.277145	18.2923
SP_PIR_KEYWORDS	dna-binding	162	7.86408	0.259315	ILMN_1254639, ILMN_1245892, ILMN_2599858, ILMN_2758073, ILMN_3109289, ILMN_2729197, ILMN_1228497, ILMN_1253593, ILMN_2749847, ILMN_2945238, ILMN_1248852, ILMN_2623793, ILMN_1215135, ILMN_1232386, ILMN_1238509, ILMN_2592476, ILMN_2475864, ILMN_2697652, ILMN_2652187, ILMN_1259904, ILMN_2903484, ILMN_2653251, ILMN_2934534, ILMN_2674228, ILMN_1214738, ILMN_3125181, ILMN_2683190, ILMN_2667889, ILMN_31…	1951	1404	17854	1.05591	1	0.753379	98.672
GOTERM_BP_FAT	GO:0051252~regulation of RNA metabolic process	163	7.91262	0.42313	ILMN_1254639, ILMN_2599858, ILMN_3109289, ILMN_2659132, ILMN_2495939, ILMN_1242264, ILMN_1228497, ILMN_2745540, ILMN_2820260, ILMN_1253593, ILMN_1248852, ILMN_2623793, ILMN_1215135, ILMN_3055904, ILMN_1232386, ILMN_2655694, ILMN_1232182, ILMN_2592476, ILMN_2652394, ILMN_2705367, ILMN_2652187, ILMN_1228414, ILMN_1225565, ILMN_2903484, ILMN_2653251, ILMN_1246873, ILMN_2698282, ILMN_3125181, ILMN_26…	1454	1488	13588	1.02371	1	0.986799	99.9954
GOTERM_BP_FAT	GO:0006355~regulation of transcription, DNA-dependent	159	7.71845	0.477448	ILMN_1254639, ILMN_2599858, ILMN_3109289, ILMN_2659132, ILMN_2495939, ILMN_1242264, ILMN_1228497, ILMN_2745540, ILMN_2820260, ILMN_1253593, ILMN_1248852, ILMN_2623793, ILMN_1215135, ILMN_3055904, ILMN_1232386, ILMN_2655694, ILMN_1232182, ILMN_2592476, ILMN_2652394, ILMN_2705367, ILMN_2652187, ILMN_1228414, ILMN_1225565, ILMN_2903484, ILMN_2653251, ILMN_1246873, ILMN_3125181, ILMN_2667889, ILMN_29…	1454	1465	13588	1.01426	1	0.991784	99.9992
GOTERM_MF_FAT	GO:0003700~transcription factor activity	71	3.4466	0.916988	ILMN_1254639, ILMN_2733514, ILMN_2792089, ILMN_2599858, ILMN_3109289, ILMN_1228497, ILMN_1253593, ILMN_2623793, ILMN_1248852, ILMN_1215135, ILMN_1232386, ILMN_2592476, ILMN_2638721, ILMN_3155789, ILMN_2652187, ILMN_1228414, ILMN_2424555, ILMN_2982097, ILMN_2903484, ILMN_2653251, ILMN_3147526, ILMN_2466845, ILMN_2667889, ILMN_3085126, ILMN_2869461, ILMN_3154640, ILMN_2852034, ILMN_2930707, ILMN_28…	1385	776	13288	0.877822	1	0.999989	100
Annotation Cluster 29	Enrichment Score: 2.637141639754785
Category	Term	Count	%	PValue	Genes	List Total	Pop Hits	Pop Total	Fold Enrichment	Bonferroni	Benjamini	FDR
SP_PIR_KEYWORDS	mitochondrion outer membrane	19	0.92233	0.000329561	ILMN_3136205, ILMN_1236123, ILMN_2892222, ILMN_2832808, ILMN_2940195, ILMN_2689259, ILMN_2839134, ILMN_3161250, ILMN_2802714, ILMN_2720180, ILMN_2641449, ILMN_2972149, ILMN_2596961, ILMN_2740348, ILMN_2441635, ILMN_1241827, ILMN_2756460, ILMN_2655954, ILMN_2939295, ILMN_2904686, ILMN_2939294	1951	69	17854	2.5199	0.151664	0.00468835	0.473402
GOTERM_CC_FAT	GO:0031968~organelle outer membrane	19	0.92233	0.00292352	ILMN_3136205, ILMN_1236123, ILMN_2892222, ILMN_2832808, ILMN_2940195, ILMN_2689259, ILMN_2839134, ILMN_3161250, ILMN_2720180, ILMN_2796651, ILMN_2641449, ILMN_2972149, ILMN_2596961, ILMN_2740348, ILMN_2441635, ILMN_1238081, ILMN_2756460, ILMN_2845214, ILMN_2677170, ILMN_2655954, ILMN_2939295, ILMN_2904686, ILMN_2939294	1289	87	12504	2.11851	0.784995	0.0335809	4.15623
GOTERM_CC_FAT	GO:0019867~outer membrane	19	0.92233	0.00428377	ILMN_3136205, ILMN_1236123, ILMN_2892222, ILMN_2832808, ILMN_2940195, ILMN_2689259, ILMN_2839134, ILMN_3161250, ILMN_2720180, ILMN_2796651, ILMN_2641449, ILMN_2972149, ILMN_2596961, ILMN_2740348, ILMN_2441635, ILMN_1238081, ILMN_2756460, ILMN_2845214, ILMN_2677170, ILMN_2655954, ILMN_2939295, ILMN_2904686, ILMN_2939294	1289	90	12504	2.04789	0.895002	0.0468218	6.0347
GOTERM_CC_FAT	GO:0005741~mitochondrial outer membrane	17	0.825243	0.00685118	ILMN_3136205, ILMN_1236123, ILMN_2892222, ILMN_2832808, ILMN_2940195, ILMN_2689259, ILMN_2839134, ILMN_3161250, ILMN_2720180, ILMN_2641449, ILMN_2972149, ILMN_2596961, ILMN_2740348, ILMN_2441635, ILMN_2756460, ILMN_2655954, ILMN_2939295, ILMN_2904686, ILMN_2939294	1289	80	12504	2.06137	0.972928	0.0696412	9.48715
Annotation Cluster 30	Enrichment Score: 2.50694420947655
Category	Term	Count	%	PValue	Genes	List Total	Pop Hits	Pop Total	Fold Enrichment	Bonferroni	Benjamini	FDR
GOTERM_BP_FAT	GO:0051276~chromosome organization	74	3.59223	4.39261e-06	ILMN_2733514, ILMN_2610835, ILMN_3147724, ILMN_2621385, ILMN_2495939, ILMN_3055904, ILMN_2648973, ILMN_1232386, ILMN_2768330, ILMN_2701501, ILMN_2990220, ILMN_2968479, ILMN_1214110, ILMN_3007271, ILMN_2741132, ILMN_2697652, ILMN_1254840, ILMN_2745450, ILMN_2705367, ILMN_3021465, ILMN_2972325, ILMN_2705227, ILMN_2603660, ILMN_2614912, ILMN_1213290, ILMN_2971744, ILMN_3154810, ILMN_2466845, ILMN_26…	1454	404	13588	1.71175	0.014101	0.000430251	0.00797524
GOTERM_BP_FAT	GO:0006325~chromatin organization	61	2.96117	5.81457e-06	ILMN_2733514, ILMN_3147724, ILMN_2495939, ILMN_3055904, ILMN_2648973, ILMN_1232386, ILMN_2768330, ILMN_2990220, ILMN_2968479, ILMN_1214110, ILMN_3007271, ILMN_2741132, ILMN_2697652, ILMN_1254840, ILMN_2745450, ILMN_2705367, ILMN_3021465, ILMN_2972325, ILMN_2705227, ILMN_2603660, ILMN_2614912, ILMN_1213290, ILMN_3154810, ILMN_2664593, ILMN_2652575, ILMN_2491301, ILMN_2729958, ILMN_2652572, ILMN_28…	1454	315	13588	1.80972	0.018623	0.000552746	0.0105568
SP_PIR_KEYWORDS	chromatin regulator	43	2.08738	7.94996e-06	ILMN_2733514, ILMN_3147724, ILMN_2495939, ILMN_2768330, ILMN_1232386, ILMN_2648973, ILMN_2990220, ILMN_2968479, ILMN_1214110, ILMN_3007271, ILMN_2697652, ILMN_1254840, ILMN_2745450, ILMN_2705367, ILMN_2972325, ILMN_2705227, ILMN_2614912, ILMN_1213290, ILMN_2790735, ILMN_2652575, ILMN_2491301, ILMN_2652572, ILMN_2659160, ILMN_1260420, ILMN_3023230, ILMN_3001076, ILMN_2679619, ILMN_2666487, ILMN_29…	1951	192	17854	2.04949	0.00395919	0.000172465	0.0114444
GOTERM_BP_FAT	GO:0016568~chromatin modification	49	2.37864	8.13345e-06	ILMN_2733514, ILMN_3147724, ILMN_2495939, ILMN_2648973, ILMN_2768330, ILMN_1232386, ILMN_2990220, ILMN_2968479, ILMN_1214110, ILMN_3007271, ILMN_1254840, ILMN_2697652, ILMN_2745450, ILMN_2705367, ILMN_2972325, ILMN_2705227, ILMN_2603660, ILMN_2614912, ILMN_1213290, ILMN_2652575, ILMN_2491301, ILMN_2652572, ILMN_2837476, ILMN_2659160, ILMN_1260420, ILMN_3023230, ILMN_3001076, ILMN_2679619, ILMN_26…	1454	236	13588	1.94033	0.0259528	0.000710438	0.0147666
GOTERM_BP_FAT	GO:0016569~covalent chromatin modification	24	1.16505	0.000151742	ILMN_2733514, ILMN_3147724, ILMN_2495939, ILMN_2768330, ILMN_1214110, ILMN_3007271, ILMN_1252310, ILMN_2690410, ILMN_2705367, ILMN_2996601, ILMN_2730498, ILMN_2651534, ILMN_2665161, ILMN_3003076, ILMN_1243875, ILMN_2603660, ILMN_2652575, ILMN_2491301, ILMN_2837476, ILMN_2652572, ILMN_2645439, ILMN_1260420, ILMN_1227863, ILMN_1215305, ILMN_3023230, ILMN_2652749, ILMN_2666487, ILMN_2932539, ILMN_26…	1454	96	13588	2.33631	0.387753	0.00957387	0.275156
GOTERM_BP_FAT	GO:0016570~histone modification	23	1.1165	0.000215602	ILMN_2733514, ILMN_3147724, ILMN_2495939, ILMN_2768330, ILMN_1214110, ILMN_3007271, ILMN_2690410, ILMN_2705367, ILMN_2996601, ILMN_2730498, ILMN_2651534, ILMN_2665161, ILMN_3003076, ILMN_1243875, ILMN_2603660, ILMN_2652575, ILMN_2491301, ILMN_2837476, ILMN_2652572, ILMN_2645439, ILMN_1260420, ILMN_1227863, ILMN_1215305, ILMN_3023230, ILMN_2652749, ILMN_2666487, ILMN_2932539, ILMN_2666483	1454	92	13588	2.33631	0.50198	0.0119473	0.390739
GOTERM_CC_FAT	GO:0000123~histone acetyltransferase complex	10	0.485437	0.00106477	ILMN_2690410, ILMN_1215305, ILMN_2826161, ILMN_2768330, ILMN_2665161, ILMN_2652749, ILMN_2652575, ILMN_2684455, ILMN_2666487, ILMN_2652572, ILMN_2839973, ILMN_2666483	1289	27	12504	3.59279	0.428393	0.0146107	1.53279
GOTERM_BP_FAT	GO:0043543~protein amino acid acylation	11	0.533981	0.028241	ILMN_1214054, ILMN_2768330, ILMN_2652575, ILMN_2652572, ILMN_2645439, ILMN_2690410, ILMN_1215305, ILMN_2822229, ILMN_2730498, ILMN_2665161, ILMN_2652749, ILMN_2666487, ILMN_2666483	1454	48	13588	2.14162	1	0.476738	40.5565
GOTERM_BP_FAT	GO:0016573~histone acetylation	9	0.436893	0.0285086	ILMN_2690410, ILMN_1215305, ILMN_2730498, ILMN_2768330, ILMN_2665161, ILMN_2652749, ILMN_2652575, ILMN_2666487, ILMN_2652572, ILMN_2645439, ILMN_2666483	1454	35	13588	2.40307	1	0.477619	40.853
GOTERM_BP_FAT	GO:0006473~protein amino acid acetylation	9	0.436893	0.033334	ILMN_2690410, ILMN_1215305, ILMN_2730498, ILMN_2768330, ILMN_2665161, ILMN_2652749, ILMN_2652575, ILMN_2666487, ILMN_2652572, ILMN_2645439, ILMN_2666483	1454	36	13588	2.33631	1	0.509204	45.9658
GOTERM_BP_FAT	GO:0043967~histone H4 acetylation	6	0.291262	0.0660864	ILMN_2690410, ILMN_2768330, ILMN_2665161, ILMN_2652749, ILMN_2652575, ILMN_2666487, ILMN_2652572, ILMN_2666483	1454	21	13588	2.67007	1	0.667037	71.102
GOTERM_CC_FAT	GO:0043189~H4/H2A histone acetyltransferase complex	4	0.194175	0.118582	ILMN_2690410, ILMN_2768330, ILMN_2666487, ILMN_2839973, ILMN_2666483	1289	12	12504	3.23351	1	0.484528	83.9608
GOTERM_BP_FAT	GO:0043983~histone H4-K12 acetylation	3	0.145631	0.167107	ILMN_2665161, ILMN_2652749, ILMN_2652575, ILMN_2652572	1454	7	13588	4.00511	1	0.877089	96.3846
GOTERM_CC_FAT	GO:0035267~NuA4 histone acetyltransferase complex	3	0.145631	0.275557	ILMN_2690410, ILMN_2768330, ILMN_2666487, ILMN_2666483	1289	10	12504	2.91016	1	0.736199	99.0664
GOTERM_BP_FAT	GO:0043968~histone H2A acetylation	3	0.145631	0.372785	ILMN_2690410, ILMN_2768330, ILMN_2666487, ILMN_2666483	1454	12	13588	2.33631	1	0.979489	99.979
GOTERM_BP_FAT	GO:0043966~histone H3 acetylation	3	0.145631	0.372785	ILMN_2665161, ILMN_2652749, ILMN_2652575, ILMN_2652572	1454	12	13588	2.33631	1	0.979489	99.979
Annotation Cluster 31	Enrichment Score: 2.502482349863509
Category	Term	Count	%	PValue	Genes	List Total	Pop Hits	Pop Total	Fold Enrichment	Bonferroni	Benjamini	FDR
GOTERM_BP_FAT	GO:0007049~cell cycle	101	4.90291	8.10863e-06	ILMN_1226997, ILMN_2828492, ILMN_2758073, ILMN_1219978, ILMN_2914510, ILMN_2854962, ILMN_1232386, ILMN_2705802, ILMN_2666669, ILMN_2710229, ILMN_1213055, ILMN_2990220, ILMN_1214110, ILMN_2893077, ILMN_2711410, ILMN_3128270, ILMN_1254840, ILMN_2681776, ILMN_2705367, ILMN_2729718, ILMN_2420070, ILMN_3163347, ILMN_2796089, ILMN_2667889, ILMN_2735625, ILMN_2850753, ILMN_2757006, ILMN_2652575, ILMN_28…	1454	611	13588	1.5448	0.0258747	0.000727938	0.0147216
SP_PIR_KEYWORDS	cell cycle	79	3.83495	1.85846e-05	ILMN_1226997, ILMN_2758073, ILMN_1219978, ILMN_2914510, ILMN_2854962, ILMN_2710229, ILMN_2666669, ILMN_2705802, ILMN_1232386, ILMN_2990220, ILMN_1213055, ILMN_1214110, ILMN_2711410, ILMN_3128270, ILMN_1254840, ILMN_2681776, ILMN_2729718, ILMN_2796089, ILMN_3163347, ILMN_2757006, ILMN_2652575, ILMN_2864798, ILMN_2602588, ILMN_2652572, ILMN_2692110, ILMN_2700448, ILMN_1219459, ILMN_2859778, ILMN_12…	1951	447	17854	1.61733	0.00923091	0.000343414	0.0267517
GOTERM_BP_FAT	GO:0000278~mitotic cell cycle	43	2.08738	0.00124522	ILMN_2610835, ILMN_2634749, ILMN_2914510, ILMN_2854962, ILMN_2710229, ILMN_1214110, ILMN_2893077, ILMN_2711410, ILMN_2770759, ILMN_2648397, ILMN_2420070, ILMN_1250574, ILMN_2717613, ILMN_2796089, ILMN_2667889, ILMN_1254374, ILMN_1237773, ILMN_2850753, ILMN_2971286, ILMN_2757006, ILMN_2864798, ILMN_2491301, ILMN_2602588, ILMN_1249242, ILMN_2692110, ILMN_2995129, ILMN_3001076, ILMN_2679619, ILMN_26…	1454	244	13588	1.64691	0.982196	0.0516239	2.23692
GOTERM_BP_FAT	GO:0051301~cell division	47	2.28155	0.00216525	ILMN_2610835, ILMN_2634749, ILMN_2914510, ILMN_2854962, ILMN_2666669, ILMN_2710229, ILMN_1214110, ILMN_2711410, ILMN_2648709, ILMN_2770759, ILMN_2648397, ILMN_1250574, ILMN_2749955, ILMN_2717613, ILMN_2742675, ILMN_2796089, ILMN_1254374, ILMN_2757006, ILMN_2864798, ILMN_2491301, ILMN_2602588, ILMN_2946862, ILMN_2700448, ILMN_3001076, ILMN_2679619, ILMN_2666487, ILMN_2666483, ILMN_2859778, ILMN_12…	1454	281	13588	1.56309	0.999095	0.0848861	3.8592
GOTERM_BP_FAT	GO:0022402~cell cycle process	60	2.91262	0.00443042	ILMN_2828492, ILMN_2610835, ILMN_2742626, ILMN_3147724, ILMN_2634749, ILMN_2914510, ILMN_2854962, ILMN_2710229, ILMN_1214110, ILMN_2893077, ILMN_2711410, ILMN_2705367, ILMN_2770759, ILMN_2648397, ILMN_2420070, ILMN_1250574, ILMN_2717613, ILMN_2796089, ILMN_2667889, ILMN_2827036, ILMN_2850753, ILMN_1254374, ILMN_2449335, ILMN_1237773, ILMN_2757006, ILMN_2971286, ILMN_2864798, ILMN_2491301, ILMN_26…	1454	393	13588	1.42676	0.999999	0.150519	7.74564
SP_PIR_KEYWORDS	cell division	42	2.03883	0.00783298	ILMN_2610835, ILMN_2634749, ILMN_2914510, ILMN_2854962, ILMN_2666669, ILMN_2710229, ILMN_1214110, ILMN_2711410, ILMN_2648709, ILMN_2770759, ILMN_2648397, ILMN_1250574, ILMN_2749955, ILMN_2717613, ILMN_2796089, ILMN_1254374, ILMN_2757006, ILMN_2864798, ILMN_2491301, ILMN_2602588, ILMN_2946862, ILMN_2700448, ILMN_3001076, ILMN_2666487, ILMN_2666483, ILMN_2859778, ILMN_1216394, ILMN_2763602, ILMN_24…	1951	256	17854	1.50137	0.980239	0.0643457	10.7037
GOTERM_BP_FAT	GO:0022403~cell cycle phase	50	2.42718	0.00979682	ILMN_2610835, ILMN_2742626, ILMN_3147724, ILMN_2634749, ILMN_2914510, ILMN_2854962, ILMN_2710229, ILMN_1214110, ILMN_2711410, ILMN_2893077, ILMN_2705367, ILMN_2770759, ILMN_2648397, ILMN_2420070, ILMN_1250574, ILMN_2717613, ILMN_2796089, ILMN_2667889, ILMN_2850753, ILMN_1237773, ILMN_1254374, ILMN_2757006, ILMN_2971286, ILMN_2864798, ILMN_2491301, ILMN_2602588, ILMN_2865939, ILMN_1249242, ILMN_26…	1454	328	13588	1.42458	1	0.265836	16.3689
GOTERM_BP_FAT	GO:0048285~organelle fission	33	1.60194	0.0105454	ILMN_2610835, ILMN_2478523, ILMN_2634749, ILMN_2914510, ILMN_2854962, ILMN_2710229, ILMN_2655204, ILMN_2856861, ILMN_1259798, ILMN_1218761, ILMN_1214110, ILMN_3024099, ILMN_2711410, ILMN_1220943, ILMN_2893077, ILMN_3158200, ILMN_2651534, ILMN_2770759, ILMN_2648397, ILMN_2655944, ILMN_2664972, ILMN_1250574, ILMN_2690077, ILMN_2717613, ILMN_2796089, ILMN_2667889, ILMN_2732689, ILMN_1254374, ILMN_27…	1454	197	13588	1.56545	1	0.278499	17.5094
GOTERM_BP_FAT	GO:0007067~mitosis	32	1.5534	0.0109981	ILMN_2610835, ILMN_2478523, ILMN_2634749, ILMN_2914510, ILMN_2854962, ILMN_2710229, ILMN_2655204, ILMN_2856861, ILMN_1259798, ILMN_1218761, ILMN_1214110, ILMN_3024099, ILMN_2711410, ILMN_1220943, ILMN_2893077, ILMN_3158200, ILMN_2651534, ILMN_2770759, ILMN_2648397, ILMN_2655944, ILMN_2664972, ILMN_1250574, ILMN_2690077, ILMN_2717613, ILMN_2796089, ILMN_2667889, ILMN_2732689, ILMN_1254374, ILMN_27…	1454	190	13588	1.57394	1	0.27965	18.1921
GOTERM_BP_FAT	GO:0000280~nuclear division	32	1.5534	0.0109981	ILMN_2610835, ILMN_2478523, ILMN_2634749, ILMN_2914510, ILMN_2854962, ILMN_2710229, ILMN_2655204, ILMN_2856861, ILMN_1259798, ILMN_1218761, ILMN_1214110, ILMN_3024099, ILMN_2711410, ILMN_1220943, ILMN_2893077, ILMN_3158200, ILMN_2651534, ILMN_2770759, ILMN_2648397, ILMN_2655944, ILMN_2664972, ILMN_1250574, ILMN_2690077, ILMN_2717613, ILMN_2796089, ILMN_2667889, ILMN_2732689, ILMN_1254374, ILMN_27…	1454	190	13588	1.57394	1	0.27965	18.1921
GOTERM_BP_FAT	GO:0000087~M phase of mitotic cell cycle	32	1.5534	0.0146196	ILMN_2610835, ILMN_2478523, ILMN_2634749, ILMN_2914510, ILMN_2854962, ILMN_2710229, ILMN_2655204, ILMN_2856861, ILMN_1259798, ILMN_1218761, ILMN_1214110, ILMN_3024099, ILMN_2711410, ILMN_1220943, ILMN_2893077, ILMN_3158200, ILMN_2651534, ILMN_2770759, ILMN_2648397, ILMN_2655944, ILMN_2664972, ILMN_1250574, ILMN_2690077, ILMN_2717613, ILMN_2796089, ILMN_2667889, ILMN_2732689, ILMN_1254374, ILMN_27…	1454	194	13588	1.54149	1	0.332028	23.4635
SP_PIR_KEYWORDS	mitosis	30	1.45631	0.0195197	ILMN_2610835, ILMN_2478523, ILMN_2634749, ILMN_2914510, ILMN_2854962, ILMN_2710229, ILMN_2856861, ILMN_1259798, ILMN_1218761, ILMN_1214110, ILMN_3024099, ILMN_2711410, ILMN_1220943, ILMN_3158200, ILMN_1377923, ILMN_2651534, ILMN_2770759, ILMN_2648397, ILMN_2655944, ILMN_2664972, ILMN_1250574, ILMN_2690077, ILMN_2717613, ILMN_2796089, ILMN_2732689, ILMN_1254374, ILMN_2757006, ILMN_2864798, ILMN_24…	1951	179	17854	1.53372	0.999947	0.144558	24.7076
GOTERM_BP_FAT	GO:0000279~M phase	40	1.94175	0.0583863	ILMN_2610835, ILMN_2742626, ILMN_3147724, ILMN_2634749, ILMN_2914510, ILMN_2854962, ILMN_2710229, ILMN_1214110, ILMN_2893077, ILMN_2711410, ILMN_2705367, ILMN_2770759, ILMN_2648397, ILMN_2420070, ILMN_1250574, ILMN_2717613, ILMN_2796089, ILMN_2667889, ILMN_1254374, ILMN_2757006, ILMN_2864798, ILMN_2491301, ILMN_2602588, ILMN_2865939, ILMN_3001076, ILMN_2666487, ILMN_2666483, ILMN_2859778, ILMN_24…	1454	283	13588	1.32088	1	0.640727	66.456
Annotation Cluster 32	Enrichment Score: 2.2112093613235375
Category	Term	Count	%	PValue	Genes	List Total	Pop Hits	Pop Total	Fold Enrichment	Bonferroni	Benjamini	FDR
SP_PIR_KEYWORDS	manganese	30	1.45631	0.00090781	ILMN_2625687, ILMN_2743831, ILMN_3001452, ILMN_2727893, ILMN_2722353, ILMN_2896049, ILMN_2643832, ILMN_1257193, ILMN_1221199, ILMN_2653312, ILMN_1214179, ILMN_2625680, ILMN_1242053, ILMN_2625681, ILMN_2930764, ILMN_2752074, ILMN_2997022, ILMN_2591381, ILMN_3132204, ILMN_2746906, ILMN_2700400, ILMN_1228544, ILMN_2428963, ILMN_2930057, ILMN_2428961, ILMN_3151840, ILMN_2751865, ILMN_3160556, ILMN_30…	1951	145	17854	1.89335	0.364411	0.0107325	1.299
UP_SEQ_FEATURE	metal ion-binding site:Manganese 1	10	0.485437	0.00128679	ILMN_2428963, ILMN_2743831, ILMN_2428961, ILMN_2727893, ILMN_3151840, ILMN_2643832, ILMN_1257193, ILMN_1221199, ILMN_1214179, ILMN_1252629, ILMN_2706495, ILMN_2752074, ILMN_2591381	1937	24	16021	3.44627	0.994459	0.579338	2.36664
UP_SEQ_FEATURE	metal ion-binding site:Manganese 2	10	0.485437	0.00128679	ILMN_2428963, ILMN_2743831, ILMN_2428961, ILMN_2727893, ILMN_3151840, ILMN_2643832, ILMN_1257193, ILMN_1221199, ILMN_1214179, ILMN_1252629, ILMN_2706495, ILMN_2752074, ILMN_2591381	1937	24	16021	3.44627	0.994459	0.579338	2.36664
GOTERM_CC_FAT	GO:0008287~protein serine/threonine phosphatase complex	11	0.533981	0.00168353	ILMN_2956881, ILMN_2971286, ILMN_3121851, ILMN_2606243, ILMN_1250063, ILMN_2727893, ILMN_3151840, ILMN_2643832, ILMN_1257193, ILMN_1221199, ILMN_1214179, ILMN_2752074, ILMN_2591381	1289	34	12504	3.13841	0.58712	0.0208416	2.41344
UP_SEQ_FEATURE	metal ion-binding site:Manganese 1; via carbonyl oxygen	7	0.339806	0.00248856	ILMN_2643832, ILMN_1221199, ILMN_1257193, ILMN_1214179, ILMN_2752074, ILMN_3151840, ILMN_2591381, ILMN_2727893	1937	13	16021	4.45364	0.999957	0.672771	4.52895
INTERPRO	IPR000222:Protein phosphatase 2C, manganese/magnesium aspartate binding site	7	0.339806	0.00431324	ILMN_2643832, ILMN_1221199, ILMN_1257193, ILMN_1214179, ILMN_2752074, ILMN_3151840, ILMN_2591381, ILMN_2727893	1876	16	17763	4.14249	0.999965	0.473425	7.30041
INTERPRO	IPR015655:Protein phosphatase 2C	7	0.339806	0.00607773	ILMN_2643832, ILMN_1221199, ILMN_1257193, ILMN_1214179, ILMN_2752074, ILMN_3151840, ILMN_2591381, ILMN_2727893	1876	17	17763	3.89881	0.999999	0.552479	10.1395
GOTERM_MF_FAT	GO:0004722~protein serine/threonine phosphatase activity	10	0.485437	0.00662778	ILMN_2643832, ILMN_1221199, ILMN_1257193, ILMN_1214179, ILMN_1242053, ILMN_2705003, ILMN_2752074, ILMN_3151840, ILMN_2591381, ILMN_2727893, ILMN_2833772	1385	34	13288	2.82183	0.999219	0.184892	10.0617
INTERPRO	IPR014045:Protein phosphatase 2C, N-terminal	7	0.339806	0.0110846	ILMN_2643832, ILMN_1221199, ILMN_1257193, ILMN_1214179, ILMN_2752074, ILMN_3151840, ILMN_2591381, ILMN_2727893	1876	19	17763	3.48841	1	0.653014	17.7559
SMART	SM00332:PP2Cc	7	0.339806	0.0140632	ILMN_2643832, ILMN_1221199, ILMN_1257193, ILMN_1214179, ILMN_2752074, ILMN_3151840, ILMN_2591381, ILMN_2727893	960	20	9131	3.32901	0.993163	0.509435	17.6234
SMART	SM00331:PP2C_SIG	7	0.339806	0.0140632	ILMN_2643832, ILMN_1221199, ILMN_1257193, ILMN_1214179, ILMN_2752074, ILMN_3151840, ILMN_2591381, ILMN_2727893	960	20	9131	3.32901	0.993163	0.509435	17.6234
INTERPRO	IPR001932:Protein phosphatase 2C-related	7	0.339806	0.0144485	ILMN_2643832, ILMN_1221199, ILMN_1257193, ILMN_1214179, ILMN_2752074, ILMN_3151840, ILMN_2591381, ILMN_2727893	1876	20	17763	3.31399	1	0.683899	22.5265
UP_SEQ_FEATURE	domain:PP2C-like	3	0.145631	0.518174	ILMN_1214179, ILMN_3151840, ILMN_2727893	1937	14	16021	1.77237	1	1	99.9999
Annotation Cluster 33	Enrichment Score: 2.172435220741377
Category	Term	Count	%	PValue	Genes	List Total	Pop Hits	Pop Total	Fold Enrichment	Bonferroni	Benjamini	FDR
GOTERM_BP_FAT	GO:0006796~phosphate metabolic process	125	6.06796	0.000361542	ILMN_2683933, ILMN_2740852, ILMN_1213055, ILMN_3163031, ILMN_2615601, ILMN_2727893, ILMN_1214394, ILMN_2633333, ILMN_2962632, ILMN_3028981, ILMN_2648746, ILMN_2928560, ILMN_1257208, ILMN_2681776, ILMN_1221199, ILMN_1228414, ILMN_1235481, ILMN_2705227, ILMN_2756460, ILMN_1244296, ILMN_2773302, ILMN_2678724, ILMN_2842137, ILMN_1259356, ILMN_2993711, ILMN_2742675, ILMN_3004142, ILMN_2833378, ILMN_12…	1454	866	13588	1.34891	0.689347	0.017825	0.65441
GOTERM_BP_FAT	GO:0006793~phosphorus metabolic process	125	6.06796	0.000361542	ILMN_2683933, ILMN_2740852, ILMN_1213055, ILMN_3163031, ILMN_2615601, ILMN_2727893, ILMN_1214394, ILMN_2633333, ILMN_2962632, ILMN_3028981, ILMN_2648746, ILMN_2928560, ILMN_1257208, ILMN_2681776, ILMN_1221199, ILMN_1228414, ILMN_1235481, ILMN_2705227, ILMN_2756460, ILMN_1244296, ILMN_2773302, ILMN_2678724, ILMN_2842137, ILMN_1259356, ILMN_2993711, ILMN_2742675, ILMN_3004142, ILMN_2833378, ILMN_12…	1454	866	13588	1.34891	0.689347	0.017825	0.65441
SP_PIR_KEYWORDS	kinase	107	5.19417	0.000421557	ILMN_2683933, ILMN_1213055, ILMN_2971845, ILMN_3028981, ILMN_2648746, ILMN_2928560, ILMN_1257208, ILMN_2681776, ILMN_2696270, ILMN_2594477, ILMN_2868482, ILMN_1235481, ILMN_3122081, ILMN_1214631, ILMN_2756460, ILMN_2705227, ILMN_2842137, ILMN_1259356, ILMN_2742675, ILMN_2723920, ILMN_2712697, ILMN_3004142, ILMN_2833378, ILMN_2689259, ILMN_1251876, ILMN_2833376, ILMN_2589556, ILMN_3125920, ILMN_28…	1951	707	17854	1.38498	0.189741	0.00567039	0.605178
GOTERM_MF_FAT	GO:0004674~protein serine/threonine kinase activity	66	3.20388	0.00073801	ILMN_2683933, ILMN_1217408, ILMN_2705324, ILMN_2669333, ILMN_2709397, ILMN_1213055, ILMN_2758632, ILMN_2758631, ILMN_2648746, ILMN_3028981, ILMN_2598692, ILMN_2745450, ILMN_2681776, ILMN_2867696, ILMN_2770759, ILMN_1217890, ILMN_2653312, ILMN_1214631, ILMN_2756460, ILMN_2705227, ILMN_2842137, ILMN_1217753, ILMN_1259356, ILMN_2742675, ILMN_2717613, ILMN_2794051, ILMN_2997308, ILMN_2753492, ILMN_30…	1385	421	13288	1.50408	0.548144	0.0339491	1.17045
GOTERM_MF_FAT	GO:0004672~protein kinase activity	84	4.07767	0.00187429	ILMN_2683933, ILMN_1213055, ILMN_3163031, ILMN_2615601, ILMN_2648746, ILMN_3028981, ILMN_2928560, ILMN_2681776, ILMN_1257208, ILMN_1214631, ILMN_2756460, ILMN_2705227, ILMN_2842137, ILMN_1259356, ILMN_2742675, ILMN_2997308, ILMN_3004142, ILMN_1251876, ILMN_2833378, ILMN_2589556, ILMN_2833376, ILMN_3125920, ILMN_2615901, ILMN_1249301, ILMN_2768805, ILMN_1238520, ILMN_2937738, ILMN_1230007, ILMN_29…	1385	583	13288	1.38236	0.867162	0.0720374	2.94746
INTERPRO	IPR008271:Serine/threonine protein kinase, active site	56	2.71845	0.00316763	ILMN_2683933, ILMN_1217408, ILMN_2669333, ILMN_2705324, ILMN_2709397, ILMN_1213055, ILMN_3028981, ILMN_2598692, ILMN_2745450, ILMN_2681776, ILMN_2867696, ILMN_2770759, ILMN_1217890, ILMN_2653312, ILMN_2705227, ILMN_2842137, ILMN_1217753, ILMN_1259356, ILMN_2717613, ILMN_2742675, ILMN_2794051, ILMN_2753492, ILMN_3004142, ILMN_2649828, ILMN_2833378, ILMN_1251876, ILMN_2747229, ILMN_2833376, ILMN_25…	1876	360	17763	1.47289	0.999464	0.394757	5.41201
SP_PIR_KEYWORDS	serine/threonine-protein kinase	60	2.91262	0.00433493	ILMN_2683933, ILMN_1217408, ILMN_2669333, ILMN_2705324, ILMN_2709397, ILMN_1213055, ILMN_3028981, ILMN_2598692, ILMN_2745450, ILMN_2681776, ILMN_2867696, ILMN_2770759, ILMN_1217890, ILMN_2653312, ILMN_1214631, ILMN_2705227, ILMN_2842137, ILMN_1217753, ILMN_1259356, ILMN_2742675, ILMN_2717613, ILMN_2794051, ILMN_2753492, ILMN_3004142, ILMN_2649828, ILMN_2833378, ILMN_1251876, ILMN_2747229, ILMN_28…	1951	384	17854	1.42988	0.885575	0.0400773	6.06272
GOTERM_BP_FAT	GO:0016310~phosphorylation	100	4.85437	0.00456287	ILMN_2683933, ILMN_2740852, ILMN_1213055, ILMN_3163031, ILMN_2615601, ILMN_1214394, ILMN_2962632, ILMN_2633333, ILMN_2648746, ILMN_3028981, ILMN_2928560, ILMN_1257208, ILMN_2681776, ILMN_1228414, ILMN_1235481, ILMN_2756460, ILMN_2705227, ILMN_2842137, ILMN_1259356, ILMN_2993711, ILMN_2742675, ILMN_3004142, ILMN_2833378, ILMN_2689259, ILMN_1251876, ILMN_2833376, ILMN_2589556, ILMN_3125920, ILMN_28…	1454	718	13588	1.30157	1	0.153063	7.96822
GOTERM_BP_FAT	GO:0006468~protein amino acid phosphorylation	90	4.36893	0.00553501	ILMN_2683933, ILMN_2740852, ILMN_1213055, ILMN_3163031, ILMN_2615601, ILMN_1214394, ILMN_2633333, ILMN_2648746, ILMN_3028981, ILMN_2928560, ILMN_2681776, ILMN_1257208, ILMN_1228414, ILMN_1235481, ILMN_2756460, ILMN_2705227, ILMN_2842137, ILMN_1259356, ILMN_2993711, ILMN_2742675, ILMN_3004142, ILMN_1251876, ILMN_2833378, ILMN_2589556, ILMN_2833376, ILMN_3125920, ILMN_2873793, ILMN_2615901, ILMN_12…	1454	640	13588	1.31418	1	0.177205	9.58651
SMART	SM00220:S_TKc	41	1.99029	0.0114512	ILMN_2683933, ILMN_1217408, ILMN_2705324, ILMN_2669333, ILMN_1213055, ILMN_3028981, ILMN_2745450, ILMN_2598692, ILMN_2681776, ILMN_2867696, ILMN_2770759, ILMN_1217890, ILMN_2705227, ILMN_1259356, ILMN_2742675, ILMN_2717613, ILMN_2794051, ILMN_3004142, ILMN_2649828, ILMN_2833378, ILMN_2833376, ILMN_3125920, ILMN_2977558, ILMN_1212894, ILMN_2598239, ILMN_2768805, ILMN_1238520, ILMN_2801404, ILMN_27…	960	265	9131	1.47158	0.982649	0.49119	14.5854
INTERPRO	IPR000719:Protein kinase, core	69	3.34951	0.0119596	ILMN_2683933, ILMN_1220170, ILMN_1217408, ILMN_2705324, ILMN_2669333, ILMN_2828877, ILMN_2709397, ILMN_1213055, ILMN_3163031, ILMN_2615601, ILMN_3028981, ILMN_2598692, ILMN_2928560, ILMN_2745450, ILMN_1257208, ILMN_2681776, ILMN_2867696, ILMN_2770759, ILMN_1217890, ILMN_2653312, ILMN_2705227, ILMN_2842137, ILMN_1217753, ILMN_1259356, ILMN_2742675, ILMN_2717613, ILMN_2794051, ILMN_2753492, ILMN_30…	1876	491	17763	1.33061	1	0.652814	19.0228
INTERPRO	IPR002290:Serine/threonine protein kinase	41	1.99029	0.0129541	ILMN_2683933, ILMN_1217408, ILMN_2705324, ILMN_2669333, ILMN_1213055, ILMN_3028981, ILMN_2745450, ILMN_2598692, ILMN_2681776, ILMN_2867696, ILMN_2770759, ILMN_1217890, ILMN_2705227, ILMN_1259356, ILMN_2742675, ILMN_2717613, ILMN_2794051, ILMN_3004142, ILMN_2649828, ILMN_2833378, ILMN_2833376, ILMN_3125920, ILMN_2977558, ILMN_1212894, ILMN_2598239, ILMN_2768805, ILMN_1238520, ILMN_2801404, ILMN_27…	1876	265	17763	1.46495	1	0.668955	20.4404
INTERPRO	IPR017442:Serine/threonine protein kinase-related	54	2.62136	0.0161864	ILMN_2683933, ILMN_1217408, ILMN_2669333, ILMN_2705324, ILMN_2709397, ILMN_1213055, ILMN_3028981, ILMN_2598692, ILMN_2745450, ILMN_2681776, ILMN_2867696, ILMN_2770759, ILMN_1217890, ILMN_2653312, ILMN_2705227, ILMN_1217753, ILMN_1259356, ILMN_2717613, ILMN_2742675, ILMN_2794051, ILMN_2753492, ILMN_3004142, ILMN_2649828, ILMN_2833378, ILMN_1251876, ILMN_2747229, ILMN_2833376, ILMN_2589556, ILMN_31…	1876	374	17763	1.36712	1	0.701998	24.8879
INTERPRO	IPR017441:Protein kinase, ATP binding site	65	3.15534	0.0176912	ILMN_2683933, ILMN_1220170, ILMN_1217408, ILMN_2705324, ILMN_2669333, ILMN_2828877, ILMN_2709397, ILMN_1213055, ILMN_3028981, ILMN_2598692, ILMN_2928560, ILMN_2745450, ILMN_1257208, ILMN_2681776, ILMN_2867696, ILMN_2770759, ILMN_1217890, ILMN_2653312, ILMN_2705227, ILMN_2842137, ILMN_1217753, ILMN_1259356, ILMN_2742675, ILMN_2717613, ILMN_2794051, ILMN_3004142, ILMN_2649828, ILMN_2833378, ILMN_12…	1876	467	17763	1.31789	1	0.712438	26.8774
UP_SEQ_FEATURE	binding site:ATP	82	3.98058	0.0267068	ILMN_2683933, ILMN_1220170, ILMN_2828687, ILMN_1217408, ILMN_2705324, ILMN_2669333, ILMN_2828877, ILMN_2709397, ILMN_1213055, ILMN_3028981, ILMN_2598692, ILMN_2928560, ILMN_2745450, ILMN_1257208, ILMN_2681776, ILMN_2867696, ILMN_2770759, ILMN_1217890, ILMN_2653312, ILMN_2705227, ILMN_2842137, ILMN_1217753, ILMN_1259356, ILMN_2742675, ILMN_2717613, ILMN_2794051, ILMN_2723920, ILMN_2753492, ILMN_30…	1937	545	16021	1.24445	1	0.993021	39.5604
UP_SEQ_FEATURE	domain:Protein kinase	70	3.39806	0.0593008	ILMN_2683933, ILMN_1220170, ILMN_1217408, ILMN_2705324, ILMN_2669333, ILMN_2828877, ILMN_2709397, ILMN_1213055, ILMN_3163031, ILMN_2615601, ILMN_3028981, ILMN_2598692, ILMN_2928560, ILMN_2745450, ILMN_1257208, ILMN_2681776, ILMN_2867696, ILMN_2770759, ILMN_1217890, ILMN_2653312, ILMN_1214631, ILMN_2705227, ILMN_2842137, ILMN_1217753, ILMN_1259356, ILMN_2742675, ILMN_2717613, ILMN_2794051, ILMN_27…	1937	476	16021	1.21633	1	0.998209	67.9255
UP_SEQ_FEATURE	nucleotide phosphate-binding region:ATP	124	6.01942	0.0896384	ILMN_2683933, ILMN_1234672, ILMN_3034877, ILMN_1213055, ILMN_1221363, ILMN_3161897, ILMN_2971845, ILMN_3028981, ILMN_2928560, ILMN_2697652, ILMN_1257208, ILMN_2681776, ILMN_3110425, ILMN_2594477, ILMN_2696270, ILMN_2691345, ILMN_3021465, ILMN_3122081, ILMN_2705227, ILMN_2842137, ILMN_1259356, ILMN_2742675, ILMN_2723920, ILMN_3154810, ILMN_2695158, ILMN_3004142, ILMN_1249708, ILMN_2833378, ILMN_27…	1937	907	16021	1.13077	1	0.998703	82.5682
UP_SEQ_FEATURE	active site:Proton acceptor	83	4.02913	0.41301	ILMN_2683933, ILMN_2733179, ILMN_1213055, ILMN_2639397, ILMN_2687156, ILMN_1214110, ILMN_1255146, ILMN_3028981, ILMN_2928560, ILMN_2681776, ILMN_1257208, ILMN_2705227, ILMN_1259356, ILMN_2742675, ILMN_3039637, ILMN_3004142, ILMN_1251876, ILMN_2833378, ILMN_2589556, ILMN_2833376, ILMN_1226515, ILMN_3125920, ILMN_1253008, ILMN_2615901, ILMN_2768805, ILMN_1238520, ILMN_1230007, ILMN_2683811, ILMN_27…	1937	662	16021	1.037	1	1	99.995
Annotation Cluster 34	Enrichment Score: 2.059931402115804
Category	Term	Count	%	PValue	Genes	List Total	Pop Hits	Pop Total	Fold Enrichment	Bonferroni	Benjamini	FDR
KEGG_PATHWAY	mmu05010:Alzheimer's disease	35	1.69903	0.00164208	ILMN_2657694, ILMN_1240857, ILMN_2616405, ILMN_2668977, ILMN_2598972, ILMN_1213055, ILMN_1215681, ILMN_2962632, ILMN_2666061, ILMN_1250000, ILMN_2588601, ILMN_2594718, ILMN_2601071, ILMN_1377924, ILMN_2512849, ILMN_2792560, ILMN_2648548, ILMN_2953411, ILMN_1224781, ILMN_1234521, ILMN_2955356, ILMN_2941992, ILMN_2842572, ILMN_2594149, ILMN_1229975, ILMN_1251771, ILMN_2638875, ILMN_2649828, ILMN_12…	643	182	5738	1.71611	0.253628	0.0240829	2.00024
KEGG_PATHWAY	mmu05016:Huntington's disease	35	1.69903	0.00180813	ILMN_2657694, ILMN_2733514, ILMN_1240857, ILMN_2743494, ILMN_2616405, ILMN_2668977, ILMN_2598972, ILMN_2962632, ILMN_2666061, ILMN_2588601, ILMN_2512849, ILMN_2792560, ILMN_1224781, ILMN_1234521, ILMN_2859659, ILMN_2842572, ILMN_2594149, ILMN_1229975, ILMN_1251771, ILMN_2466845, ILMN_2638875, ILMN_2712305, ILMN_2832808, ILMN_2869461, ILMN_1254971, ILMN_1216007, ILMN_2690620, ILMN_2604688, ILMN_26…	643	183	5738	1.70674	0.275402	0.0244754	2.20044
SP_PIR_KEYWORDS	electron transport	21	1.01942	0.00530384	ILMN_1219942, ILMN_2657694, ILMN_2594149, ILMN_2590779, ILMN_2842572, ILMN_1229975, ILMN_1251771, ILMN_1216007, ILMN_2668977, ILMN_2720180, ILMN_2453086, ILMN_2649966, ILMN_3098120, ILMN_2666061, ILMN_2588601, ILMN_1232489, ILMN_2512849, ILMN_2636384, ILMN_2792560, ILMN_1224781, ILMN_1234521, ILMN_2984012, ILMN_3142224	1951	100	17854	1.92175	0.929607	0.0462816	7.3702
GOTERM_CC_FAT	GO:0070469~respiratory chain	15	0.728155	0.00564039	ILMN_1240857, ILMN_2657694, ILMN_2842572, ILMN_1251771, ILMN_1229975, ILMN_2638875, ILMN_1216007, ILMN_2668977, ILMN_2666061, ILMN_2588601, ILMN_2512849, ILMN_2636384, ILMN_2792560, ILMN_1224781, ILMN_1234521, ILMN_3142224	1289	65	12504	2.23859	0.948676	0.0599916	7.87397
KEGG_PATHWAY	mmu00190:Oxidative phosphorylation	25	1.21359	0.00876577	ILMN_1240857, ILMN_2657694, ILMN_2973897, ILMN_2616405, ILMN_2668977, ILMN_2598972, ILMN_2962632, ILMN_1213914, ILMN_2666061, ILMN_2588601, ILMN_2512849, ILMN_2792560, ILMN_1224781, ILMN_1234521, ILMN_2594149, ILMN_2842572, ILMN_1251771, ILMN_1229975, ILMN_2638875, ILMN_1254971, ILMN_1216007, ILMN_1235186, ILMN_2691528, ILMN_1228796, ILMN_2636384, ILMN_1243149, ILMN_3142224	643	130	5738	1.71611	0.791368	0.0719112	10.2593
GOTERM_BP_FAT	GO:0022900~electron transport chain	21	1.01942	0.0147172	ILMN_1219942, ILMN_2657694, ILMN_2594149, ILMN_2590779, ILMN_2842572, ILMN_1229975, ILMN_1251771, ILMN_1216007, ILMN_2668977, ILMN_2720180, ILMN_2453086, ILMN_2649966, ILMN_3098120, ILMN_2666061, ILMN_2588601, ILMN_1232489, ILMN_2512849, ILMN_2636384, ILMN_2792560, ILMN_1224781, ILMN_1234521, ILMN_2984012, ILMN_3142224	1454	112	13588	1.75224	1	0.33156	23.601
GOTERM_BP_FAT	GO:0006091~generation of precursor metabolites and energy	40	1.94175	0.019469	ILMN_2973897, ILMN_2856157, ILMN_2657694, ILMN_2590779, ILMN_2628892, ILMN_2668977, ILMN_2598972, ILMN_2633148, ILMN_2720180, ILMN_2962632, ILMN_3098120, ILMN_2666061, ILMN_2588601, ILMN_1377924, ILMN_2512849, ILMN_1252214, ILMN_2792560, ILMN_2997022, ILMN_1224781, ILMN_1234521, ILMN_2984012, ILMN_1219942, ILMN_2594149, ILMN_2842572, ILMN_1229975, ILMN_1251771, ILMN_2679851, ILMN_1216007, ILMN_30…	1454	261	13588	1.43222	1	0.391401	30.0213
SP_PIR_KEYWORDS	respiratory chain	13	0.631068	0.0341625	ILMN_2657694, ILMN_2842572, ILMN_1251771, ILMN_1229975, ILMN_1216007, ILMN_2668977, ILMN_2666061, ILMN_2588601, ILMN_2512849, ILMN_2636384, ILMN_2792560, ILMN_1224781, ILMN_1234521, ILMN_3142224	1951	62	17854	1.9188	1	0.225142	39.372
KEGG_PATHWAY	mmu05012:Parkinson's disease	23	1.1165	0.0378952	ILMN_2657694, ILMN_1240857, ILMN_2616405, ILMN_2616573, ILMN_2598972, ILMN_2668977, ILMN_2962632, ILMN_2666061, ILMN_2588601, ILMN_2512849, ILMN_2792560, ILMN_1224781, ILMN_1234521, ILMN_2842572, ILMN_2594149, ILMN_1251771, ILMN_1229975, ILMN_2638875, ILMN_2832808, ILMN_1254971, ILMN_1216007, ILMN_2691528, ILMN_3046846, ILMN_2636384, ILMN_3142224	643	133	5738	1.54321	0.998968	0.169602	37.809
Annotation Cluster 35	Enrichment Score: 1.976012879742134
Category	Term	Count	%	PValue	Genes	List Total	Pop Hits	Pop Total	Fold Enrichment	Bonferroni	Benjamini	FDR
GOTERM_CC_FAT	GO:0005694~chromosome	61	2.96117	0.000425364	ILMN_2733514, ILMN_2610835, ILMN_2854962, ILMN_1237761, ILMN_3055904, ILMN_1232386, ILMN_1214110, ILMN_2745971, ILMN_2741132, ILMN_2711410, ILMN_1254840, ILMN_2697652, ILMN_2883414, ILMN_2770759, ILMN_3021465, ILMN_2420070, ILMN_1250574, ILMN_2683190, ILMN_2717613, ILMN_2667889, ILMN_2466845, ILMN_2664593, ILMN_2757006, ILMN_2729958, ILMN_1260420, ILMN_1240620, ILMN_3160556, ILMN_2913544, ILMN_30…	1289	378	12504	1.56543	0.200176	0.00654799	0.614976
GOTERM_CC_FAT	GO:0044427~chromosomal part	47	2.28155	0.0109649	ILMN_2733514, ILMN_2610835, ILMN_2854962, ILMN_3055904, ILMN_1237761, ILMN_2741132, ILMN_2711410, ILMN_2697652, ILMN_1254840, ILMN_2770759, ILMN_2883414, ILMN_3021465, ILMN_1250574, ILMN_2717613, ILMN_2683190, ILMN_2466845, ILMN_2664593, ILMN_2757006, ILMN_2729958, ILMN_1260420, ILMN_1240620, ILMN_3160556, ILMN_2932539, ILMN_2633511, ILMN_1215091, ILMN_2637203, ILMN_2655204, ILMN_3163539, ILMN_29…	1289	318	12504	1.43373	0.996937	0.101647	14.7737
GOTERM_CC_FAT	GO:0000785~chromatin	21	1.01942	0.253044	ILMN_2733514, ILMN_2664593, ILMN_3055904, ILMN_2757006, ILMN_2994806, ILMN_2951691, ILMN_2729958, ILMN_2839973, ILMN_2907878, ILMN_1256989, ILMN_1232524, ILMN_2641613, ILMN_2741132, ILMN_1252310, ILMN_1254840, ILMN_2697652, ILMN_2730498, ILMN_2703082, ILMN_1227225, ILMN_3021465, ILMN_3145213, ILMN_2932539, ILMN_2633511	1289	165	12504	1.23461	1	0.718001	98.5449
Annotation Cluster 36	Enrichment Score: 1.9683201572226499
Category	Term	Count	%	PValue	Genes	List Total	Pop Hits	Pop Total	Fold Enrichment	Bonferroni	Benjamini	FDR
GOTERM_CC_FAT	GO:0005761~mitochondrial ribosome	14	0.679612	0.000154074	ILMN_2643264, ILMN_1231390, ILMN_2841840, ILMN_2982192, ILMN_2787396, ILMN_2645772, ILMN_2842366, ILMN_2822621, ILMN_2633805, ILMN_2883147, ILMN_2680111, ILMN_2609087, ILMN_2664049, ILMN_1239113, ILMN_1260262, ILMN_2790113	1289	41	12504	3.31238	0.0777095	0.00269287	0.223162
GOTERM_CC_FAT	GO:0000313~organellar ribosome	14	0.679612	0.000154074	ILMN_2643264, ILMN_1231390, ILMN_2841840, ILMN_2982192, ILMN_2787396, ILMN_2645772, ILMN_2842366, ILMN_2822621, ILMN_2633805, ILMN_2883147, ILMN_2680111, ILMN_2609087, ILMN_2664049, ILMN_1239113, ILMN_1260262, ILMN_2790113	1289	41	12504	3.31238	0.0777095	0.00269287	0.223162
GOTERM_CC_FAT	GO:0005759~mitochondrial matrix	28	1.35922	0.00871848	ILMN_3139479, ILMN_2657694, ILMN_2733179, ILMN_2841840, ILMN_2982192, ILMN_2645772, ILMN_2842366, ILMN_2621074, ILMN_2883147, ILMN_2688721, ILMN_2648746, ILMN_2609087, ILMN_2664049, ILMN_1239113, ILMN_1260262, ILMN_2857581, ILMN_2493175, ILMN_2984012, ILMN_1219942, ILMN_2643264, ILMN_1231390, ILMN_2679851, ILMN_1227913, ILMN_2787396, ILMN_2822621, ILMN_2633805, ILMN_2649966, ILMN_3146224, ILMN_26…	1289	163	12504	1.66635	0.989921	0.0846137	11.9236
GOTERM_CC_FAT	GO:0031980~mitochondrial lumen	28	1.35922	0.00871848	ILMN_3139479, ILMN_2657694, ILMN_2733179, ILMN_2841840, ILMN_2982192, ILMN_2645772, ILMN_2842366, ILMN_2621074, ILMN_2883147, ILMN_2688721, ILMN_2648746, ILMN_2609087, ILMN_2664049, ILMN_1239113, ILMN_1260262, ILMN_2857581, ILMN_2493175, ILMN_2984012, ILMN_1219942, ILMN_2643264, ILMN_1231390, ILMN_2679851, ILMN_1227913, ILMN_2787396, ILMN_2822621, ILMN_2633805, ILMN_2649966, ILMN_3146224, ILMN_26…	1289	163	12504	1.66635	0.989921	0.0846137	11.9236
GOTERM_CC_FAT	GO:0033279~ribosomal subunit	12	0.582524	0.0730558	ILMN_2643264, ILMN_1231390, ILMN_2851231, ILMN_2841840, ILMN_2645772, ILMN_2787396, ILMN_2982192, ILMN_2842366, ILMN_2822621, ILMN_2633805, ILMN_2680111, ILMN_2948086, ILMN_1239113, ILMN_3126986	1289	66	12504	1.76374	1	0.370677	66.7107
GOTERM_CC_FAT	GO:0000315~organellar large ribosomal subunit	6	0.291262	0.0807489	ILMN_2643264, ILMN_1231390, ILMN_2982192, ILMN_2645772, ILMN_2842366, ILMN_2822621, ILMN_2633805	1289	23	12504	2.53058	1	0.388073	70.4998
GOTERM_CC_FAT	GO:0005762~mitochondrial large ribosomal subunit	6	0.291262	0.0807489	ILMN_2643264, ILMN_1231390, ILMN_2982192, ILMN_2645772, ILMN_2842366, ILMN_2822621, ILMN_2633805	1289	23	12504	2.53058	1	0.388073	70.4998
GOTERM_CC_FAT	GO:0015934~large ribosomal subunit	7	0.339806	0.208531	ILMN_2643264, ILMN_1231390, ILMN_2851231, ILMN_2982192, ILMN_2645772, ILMN_2842366, ILMN_2822621, ILMN_2633805	1289	39	12504	1.74112	1	0.646723	96.632
Annotation Cluster 37	Enrichment Score: 1.9527798606680304
Category	Term	Count	%	PValue	Genes	List Total	Pop Hits	Pop Total	Fold Enrichment	Bonferroni	Benjamini	FDR
GOTERM_CC_FAT	GO:0016585~chromatin remodeling complex	14	0.679612	0.00128887	ILMN_2733514, ILMN_1213290, ILMN_3154810, ILMN_1219275, ILMN_2768755, ILMN_1219978, ILMN_2591626, ILMN_3055904, ILMN_2659160, ILMN_2641613, ILMN_1215305, ILMN_1254840, ILMN_2730498, ILMN_2691187, ILMN_2691192, ILMN_2614912, ILMN_1225235	1289	50	12504	2.71615	0.491907	0.0167848	1.85258
GOTERM_CC_FAT	GO:0000118~histone deacetylase complex	9	0.436893	0.0137229	ILMN_2733514, ILMN_1213290, ILMN_1219275, ILMN_1219978, ILMN_2768755, ILMN_2730498, ILMN_3055904, ILMN_2691187, ILMN_2659160, ILMN_2614912, ILMN_2691192, ILMN_1225235	1289	32	12504	2.72828	0.999293	0.12357	18.1554
GOTERM_CC_FAT	GO:0016581~NuRD complex	5	0.242718	0.0141455	ILMN_2733514, ILMN_1219275, ILMN_1219978, ILMN_2730498, ILMN_2691187, ILMN_2691192, ILMN_1225235	1289	10	12504	4.85027	0.999435	0.125026	18.6625
GOTERM_CC_FAT	GO:0017053~transcriptional repressor complex	7	0.339806	0.061746	ILMN_2733514, ILMN_2635516, ILMN_1219275, ILMN_1219978, ILMN_2730498, ILMN_3055904, ILMN_2691187, ILMN_2691192, ILMN_1225235	1289	28	12504	2.42514	1	0.341808	60.3111
Annotation Cluster 38	Enrichment Score: 1.8895913325618054
Category	Term	Count	%	PValue	Genes	List Total	Pop Hits	Pop Total	Fold Enrichment	Bonferroni	Benjamini	FDR
SP_PIR_KEYWORDS	Chromosome partition	12	0.582524	0.000373328	ILMN_2711410, ILMN_1220943, ILMN_2854962, ILMN_2757006, ILMN_2648973, ILMN_2606243, ILMN_2499058, ILMN_2655944, ILMN_1217753, ILMN_3024099, ILMN_1250574, ILMN_3123970	1951	32	17854	3.4317	0.169997	0.00516234	0.536115
GOTERM_BP_FAT	GO:0007059~chromosome segregation	14	0.679612	0.0165096	ILMN_2667889, ILMN_2854962, ILMN_2757006, ILMN_2648973, ILMN_1259798, ILMN_3024099, ILMN_3123970, ILMN_1220943, ILMN_2711410, ILMN_2432458, ILMN_2499058, ILMN_2655944, ILMN_1217753, ILMN_1250574	1454	64	13588	2.04427	1	0.356708	26.0856
SP_PIR_KEYWORDS	kinetochore	9	0.436893	0.347856	ILMN_2711410, ILMN_1220943, ILMN_2854962, ILMN_2890574, ILMN_2655944, ILMN_3024099, ILMN_2690077, ILMN_1250574, ILMN_2654013	1951	61	17854	1.35018	1	0.816032	99.7876
Annotation Cluster 39	Enrichment Score: 1.87772046730704
Category	Term	Count	%	PValue	Genes	List Total	Pop Hits	Pop Total	Fold Enrichment	Bonferroni	Benjamini	FDR
GOTERM_BP_FAT	GO:0022618~ribonucleoprotein complex assembly	11	0.533981	0.00223697	ILMN_2741726, ILMN_2774163, ILMN_1214319, ILMN_2631813, ILMN_1236796, ILMN_1221266, ILMN_1251876, ILMN_2755730, ILMN_2920800, ILMN_2698282, ILMN_2942492, ILMN_2712642	1454	34	13588	3.02346	0.999283	0.0865283	3.9846
GOTERM_BP_FAT	GO:0000245~spliceosome assembly	7	0.339806	0.00315569	ILMN_1214319, ILMN_2631813, ILMN_1236796, ILMN_1221266, ILMN_1251876, ILMN_2920800, ILMN_2698282, ILMN_2942492	1454	15	13588	4.36112	0.999964	0.113272	5.5772
GOTERM_BP_FAT	GO:0000375~RNA splicing, via transesterification reactions	9	0.436893	0.0386854	ILMN_2741726, ILMN_1214319, ILMN_2631813, ILMN_1236796, ILMN_1221266, ILMN_1254380, ILMN_1251876, ILMN_2920800, ILMN_2698282, ILMN_2942492	1454	37	13588	2.27317	1	0.549415	51.1467
GOTERM_BP_FAT	GO:0000377~RNA splicing, via transesterification reactions with bulged adenosine as nucleophile	9	0.436893	0.0386854	ILMN_2741726, ILMN_1214319, ILMN_2631813, ILMN_1236796, ILMN_1221266, ILMN_1254380, ILMN_1251876, ILMN_2920800, ILMN_2698282, ILMN_2942492	1454	37	13588	2.27317	1	0.549415	51.1467
GOTERM_BP_FAT	GO:0000398~nuclear mRNA splicing, via spliceosome	9	0.436893	0.0386854	ILMN_2741726, ILMN_1214319, ILMN_2631813, ILMN_1236796, ILMN_1221266, ILMN_1254380, ILMN_1251876, ILMN_2920800, ILMN_2698282, ILMN_2942492	1454	37	13588	2.27317	1	0.549415	51.1467
Annotation Cluster 40	Enrichment Score: 1.8735672639506846
Category	Term	Count	%	PValue	Genes	List Total	Pop Hits	Pop Total	Fold Enrichment	Bonferroni	Benjamini	FDR
GOTERM_CC_FAT	GO:0032039~integrator complex	5	0.242718	0.00923147	ILMN_2678269, ILMN_1249116, ILMN_2522765, ILMN_2952587, ILMN_2711570	1289	9	12504	5.38919	0.992319	0.0877749	12.5821
GOTERM_BP_FAT	GO:0016073~snRNA metabolic process	5	0.242718	0.016107	ILMN_2678269, ILMN_1249116, ILMN_2522765, ILMN_2952587, ILMN_2711570	1454	10	13588	4.67263	1	0.352001	25.5342
GOTERM_BP_FAT	GO:0016180~snRNA processing	5	0.242718	0.016107	ILMN_2678269, ILMN_1249116, ILMN_2522765, ILMN_2952587, ILMN_2711570	1454	10	13588	4.67263	1	0.352001	25.5342
Annotation Cluster 41	Enrichment Score: 1.8359453869085793
Category	Term	Count	%	PValue	Genes	List Total	Pop Hits	Pop Total	Fold Enrichment	Bonferroni	Benjamini	FDR
GOTERM_BP_FAT	GO:0006730~one-carbon metabolic process	28	1.35922	8.4134e-05	ILMN_3147724, ILMN_2948712, ILMN_2674140, ILMN_2648973, ILMN_1245795, ILMN_1214110, ILMN_3007271, ILMN_2995755, ILMN_1252310, ILMN_2828420, ILMN_1255201, ILMN_2705367, ILMN_2996601, ILMN_1235697, ILMN_2651534, ILMN_3003076, ILMN_2943477, ILMN_2818206, ILMN_2943476, ILMN_2666272, ILMN_1243875, ILMN_2603660, ILMN_1249624, ILMN_1248381, ILMN_2757008, ILMN_2591823, ILMN_2837476, ILMN_2699635, ILMN_27…	1454	117	13588	2.23647	0.238158	0.00589596	0.152649
GOTERM_BP_FAT	GO:0032259~methylation	21	1.01942	0.000181244	ILMN_3147724, ILMN_2948712, ILMN_2648973, ILMN_1214110, ILMN_3007271, ILMN_2995755, ILMN_1252310, ILMN_2705367, ILMN_2996601, ILMN_1235697, ILMN_2651534, ILMN_3003076, ILMN_2818206, ILMN_2943477, ILMN_2943476, ILMN_2666272, ILMN_2603660, ILMN_1243875, ILMN_1249624, ILMN_2591823, ILMN_2837476, ILMN_2699635, ILMN_2791578, ILMN_1260420, ILMN_2758728, ILMN_2720763, ILMN_2738554	1454	79	13588	2.48418	0.44346	0.010996	0.328569
GOTERM_BP_FAT	GO:0043414~biopolymer methylation	18	0.873786	0.00106843	ILMN_3147724, ILMN_2948712, ILMN_2648973, ILMN_2591823, ILMN_2699635, ILMN_2837476, ILMN_3007271, ILMN_2791578, ILMN_1260420, ILMN_2995755, ILMN_2758728, ILMN_1252310, ILMN_2705367, ILMN_2996601, ILMN_3003076, ILMN_2818206, ILMN_2943477, ILMN_2943476, ILMN_2666272, ILMN_1243875, ILMN_2603660, ILMN_1249624, ILMN_2738554	1454	71	13588	2.36922	0.968447	0.0462402	1.92224
GOTERM_BP_FAT	GO:0006479~protein amino acid methylation	13	0.631068	0.00139296	ILMN_3147724, ILMN_2948712, ILMN_2699635, ILMN_2837476, ILMN_3007271, ILMN_2791578, ILMN_2995755, ILMN_1260420, ILMN_2758728, ILMN_2705367, ILMN_2996601, ILMN_3003076, ILMN_2943477, ILMN_2943476, ILMN_2666272, ILMN_1243875, ILMN_2603660	1454	43	13588	2.82531	0.988964	0.0568473	2.49916
GOTERM_BP_FAT	GO:0008213~protein amino acid alkylation	13	0.631068	0.00139296	ILMN_3147724, ILMN_2948712, ILMN_2699635, ILMN_2837476, ILMN_3007271, ILMN_2791578, ILMN_2995755, ILMN_1260420, ILMN_2758728, ILMN_2705367, ILMN_2996601, ILMN_3003076, ILMN_2943477, ILMN_2943476, ILMN_2666272, ILMN_1243875, ILMN_2603660	1454	43	13588	2.82531	0.988964	0.0568473	2.49916
GOTERM_MF_FAT	GO:0008170~N-methyltransferase activity	11	0.533981	0.0133037	ILMN_3147724, ILMN_3007271, ILMN_1260420, ILMN_2699833, ILMN_2705367, ILMN_2996601, ILMN_2719460, ILMN_3001076, ILMN_2759335, ILMN_3003076, ILMN_1218263, ILMN_1243875, ILMN_2603660	1385	44	13288	2.39856	0.999999	0.284759	19.2312
SMART	SM00317:SET	11	0.533981	0.0219157	ILMN_1223358, ILMN_3147724, ILMN_2945238, ILMN_2743650, ILMN_1260420, ILMN_1247099, ILMN_2668165, ILMN_2699833, ILMN_2705367, ILMN_2996601, ILMN_3001076, ILMN_1243875, ILMN_2603660	960	47	9131	2.22609	0.99959	0.579654	26.1642
INTERPRO	IPR001214:SET	11	0.533981	0.0227711	ILMN_1223358, ILMN_3147724, ILMN_2945238, ILMN_2743650, ILMN_1260420, ILMN_1247099, ILMN_2668165, ILMN_2699833, ILMN_2705367, ILMN_2996601, ILMN_3001076, ILMN_1243875, ILMN_2603660	1876	47	17763	2.21604	1	0.75393	33.2329
KEGG_PATHWAY	mmu00310:Lysine degradation	10	0.485437	0.0342024	ILMN_1247099, ILMN_3147724, ILMN_2705367, ILMN_2996601, ILMN_2733179, ILMN_3001076, ILMN_2639805, ILMN_2689581, ILMN_2603660, ILMN_1243875, ILMN_1260420, ILMN_1253008	643	41	5738	2.17654	0.99796	0.158081	34.8098
GOTERM_MF_FAT	GO:0008276~protein methyltransferase activity	10	0.485437	0.0398227	ILMN_3147724, ILMN_3007271, ILMN_1260420, ILMN_2758728, ILMN_2699833, ILMN_2705367, ILMN_2996601, ILMN_3001076, ILMN_3003076, ILMN_2943477, ILMN_2943476, ILMN_2666272, ILMN_1243875, ILMN_2603660	1385	45	13288	2.13205	1	0.523418	47.6936
GOTERM_BP_FAT	GO:0016571~histone methylation	7	0.339806	0.0442155	ILMN_3147724, ILMN_2705367, ILMN_2996601, ILMN_3003076, ILMN_2603660, ILMN_1243875, ILMN_2837476, ILMN_3007271, ILMN_1260420	1454	25	13588	2.61667	1	0.58553	56.0052
GOTERM_MF_FAT	GO:0042054~histone methyltransferase activity	8	0.38835	0.057576	ILMN_2699833, ILMN_3147724, ILMN_2705367, ILMN_2996601, ILMN_3001076, ILMN_3003076, ILMN_2603660, ILMN_1243875, ILMN_3007271, ILMN_1260420	1385	34	13288	2.25746	1	0.582748	61.158
GOTERM_MF_FAT	GO:0018024~histone-lysine N-methyltransferase activity	6	0.291262	0.127094	ILMN_2699833, ILMN_3147724, ILMN_2705367, ILMN_2996601, ILMN_3001076, ILMN_2603660, ILMN_1243875, ILMN_1260420	1385	26	13288	2.21405	1	0.768361	88.5554
GOTERM_MF_FAT	GO:0016279~protein-lysine N-methyltransferase activity	6	0.291262	0.127094	ILMN_2699833, ILMN_3147724, ILMN_2705367, ILMN_2996601, ILMN_3001076, ILMN_2603660, ILMN_1243875, ILMN_1260420	1385	26	13288	2.21405	1	0.768361	88.5554
GOTERM_MF_FAT	GO:0016278~lysine N-methyltransferase activity	6	0.291262	0.127094	ILMN_2699833, ILMN_3147724, ILMN_2705367, ILMN_2996601, ILMN_3001076, ILMN_2603660, ILMN_1243875, ILMN_1260420	1385	26	13288	2.21405	1	0.768361	88.5554
UP_SEQ_FEATURE	domain:SET	8	0.38835	0.168211	ILMN_1223358, ILMN_2699833, ILMN_3147724, ILMN_2705367, ILMN_2996601, ILMN_3001076, ILMN_2945238, ILMN_2743650, ILMN_1243875, ILMN_1260420	1937	38	16021	1.74127	1	0.999956	96.7478
UP_SEQ_FEATURE	region of interest:S-adenosyl-L-methionine binding	6	0.291262	0.244754	ILMN_2699833, ILMN_3147724, ILMN_2705367, ILMN_2688383, ILMN_3001076, ILMN_1219921, ILMN_1215147	1937	28	16021	1.77237	1	0.999996	99.4601
Annotation Cluster 42	Enrichment Score: 1.780617450775995
Category	Term	Count	%	PValue	Genes	List Total	Pop Hits	Pop Total	Fold Enrichment	Bonferroni	Benjamini	FDR
GOTERM_BP_FAT	GO:0043087~regulation of GTPase activity	20	0.970874	0.00402058	ILMN_2962083, ILMN_1228165, ILMN_1222682, ILMN_2599532, ILMN_1218901, ILMN_1223713, ILMN_2620053, ILMN_1236232, ILMN_1217144, ILMN_3121578, ILMN_1251220, ILMN_1243107, ILMN_2754598, ILMN_2906471, ILMN_2648618, ILMN_2694153, ILMN_2756460, ILMN_2987294, ILMN_2906473, ILMN_1241481, ILMN_3135566, ILMN_2722583, ILMN_1238928	1454	93	13588	2.00973	0.999998	0.139042	7.05365
GOTERM_MF_FAT	GO:0008060~ARF GTPase activator activity	8	0.38835	0.00716139	ILMN_1243107, ILMN_2962083, ILMN_2754598, ILMN_1222682, ILMN_2648618, ILMN_2694153, ILMN_1236232, ILMN_1241481, ILMN_3121578	1385	23	13288	3.33712	0.999562	0.184138	10.829
SMART	SM00105:ArfGap	8	0.38835	0.00746998	ILMN_1243107, ILMN_2962083, ILMN_2754598, ILMN_1222682, ILMN_2648618, ILMN_2694153, ILMN_1236232, ILMN_1241481, ILMN_3121578	960	23	9131	3.30833	0.928589	0.410134	9.75443
INTERPRO	IPR001164:Arf GTPase activating protein	8	0.38835	0.00771632	ILMN_1243107, ILMN_2962083, ILMN_2754598, ILMN_1222682, ILMN_2648618, ILMN_2694153, ILMN_1236232, ILMN_1241481, ILMN_3121578	1876	23	17763	3.29341	1	0.62011	12.7025
GOTERM_BP_FAT	GO:0032312~regulation of ARF GTPase activity	8	0.38835	0.00826427	ILMN_1243107, ILMN_2962083, ILMN_2754598, ILMN_1222682, ILMN_2648618, ILMN_2694153, ILMN_1236232, ILMN_1241481, ILMN_3121578	1454	23	13588	3.25052	1	0.241636	13.9873
GOTERM_BP_FAT	GO:0032318~regulation of Ras GTPase activity	17	0.825243	0.00972848	ILMN_2962083, ILMN_1228165, ILMN_1222682, ILMN_1218901, ILMN_2620053, ILMN_1236232, ILMN_1217144, ILMN_3121578, ILMN_1251220, ILMN_1243107, ILMN_2754598, ILMN_2906471, ILMN_2648618, ILMN_2694153, ILMN_2756460, ILMN_2987294, ILMN_2906473, ILMN_1241481, ILMN_2722583, ILMN_1238928	1454	80	13588	1.98587	1	0.266454	16.2641
UP_SEQ_FEATURE	domain:Arf-GAP	7	0.339806	0.0337368	ILMN_1243107, ILMN_2754598, ILMN_1222682, ILMN_2648618, ILMN_2694153, ILMN_1241481, ILMN_3121578	1937	21	16021	2.75701	1	0.986798	47.1845
GOTERM_BP_FAT	GO:0032012~regulation of ARF protein signal transduction	8	0.38835	0.105088	ILMN_1243107, ILMN_2962083, ILMN_2754598, ILMN_1222682, ILMN_2648618, ILMN_2694153, ILMN_1236232, ILMN_1241481, ILMN_3121578	1454	38	13588	1.96742	1	0.785746	86.6804
UP_SEQ_FEATURE	zinc finger region:C4-type	10	0.485437	0.199307	ILMN_3154849, ILMN_2666438, ILMN_2754598, ILMN_1222682, ILMN_3046846, ILMN_2648618, ILMN_2971481, ILMN_2694153, ILMN_2850839, ILMN_1241481, ILMN_1247048	1937	54	16021	1.53167	1	0.999984	98.399
Annotation Cluster 43	Enrichment Score: 1.7528770204166375
Category	Term	Count	%	PValue	Genes	List Total	Pop Hits	Pop Total	Fold Enrichment	Bonferroni	Benjamini	FDR
GOTERM_BP_FAT	GO:0006606~protein import into nucleus	15	0.728155	0.00185217	ILMN_2764995, ILMN_2466845, ILMN_2971286, ILMN_2923599, ILMN_3135931, ILMN_1214394, ILMN_2677092, ILMN_2464553, ILMN_2594971, ILMN_1251572, ILMN_1235979, ILMN_2617265, ILMN_2670415, ILMN_3135566, ILMN_1245579, ILMN_2968807	1454	56	13588	2.50319	0.997505	0.0739632	3.31003
GOTERM_BP_FAT	GO:0051170~nuclear import	15	0.728155	0.00264182	ILMN_2764995, ILMN_2466845, ILMN_2971286, ILMN_2923599, ILMN_3135931, ILMN_1214394, ILMN_2677092, ILMN_2464553, ILMN_2594971, ILMN_1251572, ILMN_1235979, ILMN_2617265, ILMN_2670415, ILMN_3135566, ILMN_1245579, ILMN_2968807	1454	58	13588	2.41688	0.999807	0.0990419	4.68951
INTERPRO	IPR001494:Importin-beta, N-terminal	5	0.242718	0.0654655	ILMN_2764995, ILMN_2464553, ILMN_2923599, ILMN_1251572, ILMN_2617265	1876	15	17763	3.15618	1	0.943317	69.4984
GOTERM_BP_FAT	GO:0000059~protein import into nucleus, docking	5	0.242718	0.0680589	ILMN_2764995, ILMN_2464553, ILMN_2923599, ILMN_1251572, ILMN_2617265	1454	15	13588	3.11508	1	0.674555	72.1904
UP_SEQ_FEATURE	domain:Importin N-terminal	5	0.242718	0.0789103	ILMN_2764995, ILMN_2464553, ILMN_2923599, ILMN_1251572, ILMN_2617265	1937	14	16021	2.95394	1	0.998684	78.3238
Annotation Cluster 44	Enrichment Score: 1.750805611888062
Category	Term	Count	%	PValue	Genes	List Total	Pop Hits	Pop Total	Fold Enrichment	Bonferroni	Benjamini	FDR
GOTERM_BP_FAT	GO:0006401~RNA catabolic process	12	0.582524	0.0109525	ILMN_2741726, ILMN_3162184, ILMN_2697060, ILMN_2930057, ILMN_1242419, ILMN_2999007, ILMN_3160556, ILMN_2690873, ILMN_2783429, ILMN_3123120, ILMN_3066222, ILMN_2861331, ILMN_1251056, ILMN_3144358, ILMN_2971946	1454	48	13588	2.33631	1	0.280842	18.1235
GOTERM_BP_FAT	GO:0006402~mRNA catabolic process	11	0.533981	0.0114086	ILMN_2741726, ILMN_3162184, ILMN_2697060, ILMN_2930057, ILMN_2999007, ILMN_1242419, ILMN_3160556, ILMN_2690873, ILMN_2783429, ILMN_3123120, ILMN_2861331, ILMN_1251056, ILMN_2971946	1454	42	13588	2.44757	1	0.284087	18.8063
SP_PIR_KEYWORDS	nonsense-mediated mrna decay	8	0.38835	0.0149882	ILMN_1242419, ILMN_2999007, ILMN_3160556, ILMN_3162184, ILMN_2697060, ILMN_2783429, ILMN_2690873, ILMN_3123120, ILMN_2861331, ILMN_2930057	1951	25	17854	2.92839	0.999466	0.114448	19.5399
GOTERM_BP_FAT	GO:0000184~nuclear-transcribed mRNA catabolic process, nonsense-mediated decay	8	0.38835	0.0166944	ILMN_1242419, ILMN_2999007, ILMN_3160556, ILMN_3162184, ILMN_2697060, ILMN_2783429, ILMN_2690873, ILMN_3123120, ILMN_2861331, ILMN_2930057	1454	26	13588	2.87546	1	0.357578	26.3374
GOTERM_BP_FAT	GO:0000956~nuclear-transcribed mRNA catabolic process	8	0.38835	0.0563515	ILMN_1242419, ILMN_2999007, ILMN_3160556, ILMN_3162184, ILMN_2697060, ILMN_2783429, ILMN_2690873, ILMN_3123120, ILMN_2861331, ILMN_2930057	1454	33	13588	2.26552	1	0.629227	65.1152
Annotation Cluster 45	Enrichment Score: 1.727202897914166
Category	Term	Count	%	PValue	Genes	List Total	Pop Hits	Pop Total	Fold Enrichment	Bonferroni	Benjamini	FDR
UP_SEQ_FEATURE	active site:Glycyl thioester intermediate	17	0.825243	0.00192179	ILMN_1231854, ILMN_1246724, ILMN_2724386, ILMN_1215117, ILMN_2763115, ILMN_3160787, ILMN_3163529, ILMN_2512043, ILMN_1224561, ILMN_2878501, ILMN_1216388, ILMN_2590349, ILMN_1227863, ILMN_2667100, ILMN_2717727, ILMN_2590350, ILMN_2512042, ILMN_2499058, ILMN_3005669, ILMN_2462202, ILMN_2594344	1937	61	16021	2.30504	0.999574	0.621007	3.51489
INTERPRO	IPR016135:Ubiquitin-conjugating enzyme/RWD-like	12	0.582524	0.0136132	ILMN_2682811, ILMN_1231854, ILMN_2724386, ILMN_1215117, ILMN_2763115, ILMN_3161591, ILMN_2512043, ILMN_1224561, ILMN_2796557, ILMN_2590349, ILMN_1227863, ILMN_2922728, ILMN_2590350, ILMN_2512042, ILMN_2499058, ILMN_2462202	1876	50	17763	2.27245	1	0.674393	21.367
SMART	SM00212:UBCc	9	0.436893	0.0677494	ILMN_1231854, ILMN_2724386, ILMN_1215117, ILMN_2763115, ILMN_2512043, ILMN_3161591, ILMN_1224561, ILMN_2590349, ILMN_1227863, ILMN_2590350, ILMN_2512042, ILMN_2499058, ILMN_2462202	960	42	9131	2.03817	1	0.766037	61.7218
INTERPRO	IPR000608:Ubiquitin-conjugating enzyme, E2	9	0.436893	0.0696008	ILMN_1231854, ILMN_2724386, ILMN_1215117, ILMN_2763115, ILMN_2512043, ILMN_3161591, ILMN_1224561, ILMN_2590349, ILMN_1227863, ILMN_2590350, ILMN_2512042, ILMN_2499058, ILMN_2462202	1876	42	17763	2.02898	1	0.94513	71.7808
Annotation Cluster 46	Enrichment Score: 1.718154042380211
Category	Term	Count	%	PValue	Genes	List Total	Pop Hits	Pop Total	Fold Enrichment	Bonferroni	Benjamini	FDR
GOTERM_MF_FAT	GO:0005525~GTP binding	54	2.62136	0.00420574	ILMN_1257428, ILMN_2914510, ILMN_2510196, ILMN_2620304, ILMN_3128270, ILMN_1377920, ILMN_2754598, ILMN_2997998, ILMN_3111421, ILMN_2420070, ILMN_2773302, ILMN_2588051, ILMN_2588052, ILMN_1237773, ILMN_2623184, ILMN_1259148, ILMN_2963223, ILMN_1223624, ILMN_3163044, ILMN_2786764, ILMN_2791578, ILMN_2946862, ILMN_2930364, ILMN_2786763, ILMN_1228564, ILMN_2679711, ILMN_2790636, ILMN_1219459, ILMN_27…	1385	354	13288	1.46353	0.989272	0.124868	6.50023
GOTERM_MF_FAT	GO:0032561~guanyl ribonucleotide binding	54	2.62136	0.00698266	ILMN_1257428, ILMN_2914510, ILMN_2510196, ILMN_2620304, ILMN_3128270, ILMN_1377920, ILMN_2754598, ILMN_2997998, ILMN_3111421, ILMN_2420070, ILMN_2773302, ILMN_2588051, ILMN_2588052, ILMN_1237773, ILMN_2623184, ILMN_1259148, ILMN_2963223, ILMN_1223624, ILMN_3163044, ILMN_2786764, ILMN_2791578, ILMN_2946862, ILMN_2930364, ILMN_2786763, ILMN_1228564, ILMN_2679711, ILMN_2790636, ILMN_1219459, ILMN_27…	1385	363	13288	1.42724	0.999468	0.188958	10.5727
GOTERM_MF_FAT	GO:0019001~guanyl nucleotide binding	54	2.62136	0.00698266	ILMN_1257428, ILMN_2914510, ILMN_2510196, ILMN_2620304, ILMN_3128270, ILMN_1377920, ILMN_2754598, ILMN_2997998, ILMN_3111421, ILMN_2420070, ILMN_2773302, ILMN_2588051, ILMN_2588052, ILMN_1237773, ILMN_2623184, ILMN_1259148, ILMN_2963223, ILMN_1223624, ILMN_3163044, ILMN_2786764, ILMN_2791578, ILMN_2946862, ILMN_2930364, ILMN_2786763, ILMN_1228564, ILMN_2679711, ILMN_2790636, ILMN_1219459, ILMN_27…	1385	363	13288	1.42724	0.999468	0.188958	10.5727
SP_PIR_KEYWORDS	gtp-binding	48	2.3301	0.0149402	ILMN_2914510, ILMN_2510196, ILMN_2620304, ILMN_2754598, ILMN_1377920, ILMN_2997998, ILMN_3111421, ILMN_2420070, ILMN_2773302, ILMN_2588051, ILMN_2588052, ILMN_1237773, ILMN_2623184, ILMN_1259148, ILMN_2963223, ILMN_1223624, ILMN_2786764, ILMN_2791578, ILMN_2786763, ILMN_2946862, ILMN_2930364, ILMN_1228564, ILMN_2679711, ILMN_2790636, ILMN_2763867, ILMN_2928051, ILMN_2928050, ILMN_2653567, ILMN_27…	1951	313	17854	1.40338	0.999453	0.115858	19.4835
GOTERM_MF_FAT	GO:0003924~GTPase activity	21	1.01942	0.0421155	ILMN_2653567, ILMN_2914510, ILMN_1258042, ILMN_2462448, ILMN_2510196, ILMN_2517170, ILMN_2659616, ILMN_1377920, ILMN_3111421, ILMN_2420070, ILMN_2464061, ILMN_2588051, ILMN_1227164, ILMN_2588052, ILMN_1232989, ILMN_1237773, ILMN_1223624, ILMN_2786764, ILMN_2930364, ILMN_2946862, ILMN_2786763, ILMN_2791578, ILMN_1216072, ILMN_2669441, ILMN_2604097	1385	128	13288	1.57405	1	0.526093	49.6502
INTERPRO	IPR005225:Small GTP-binding protein	25	1.21359	0.0618526	ILMN_2653567, ILMN_2679513, ILMN_1258042, ILMN_2887208, ILMN_2620304, ILMN_2677494, ILMN_2734969, ILMN_2659616, ILMN_2740348, ILMN_2997998, ILMN_1237773, ILMN_1215009, ILMN_2623184, ILMN_2963223, ILMN_1212902, ILMN_2839134, ILMN_1223624, ILMN_2699635, ILMN_2786764, ILMN_2786763, ILMN_2930364, ILMN_2946862, ILMN_1216072, ILMN_2669441, ILMN_1252195, ILMN_2679711, ILMN_2693124, ILMN_2790636, ILMN_27…	1876	164	17763	1.44338	1	0.936449	67.363
UP_SEQ_FEATURE	nucleotide phosphate-binding region:GTP	41	1.99029	0.117728	ILMN_2653567, ILMN_2914510, ILMN_2745005, ILMN_2679513, ILMN_1239569, ILMN_1258042, ILMN_2462448, ILMN_2510196, ILMN_2887208, ILMN_2517170, ILMN_2620304, ILMN_2677494, ILMN_2734969, ILMN_2659616, ILMN_1377920, ILMN_2754598, ILMN_2997998, ILMN_1214375, ILMN_3111421, ILMN_2420070, ILMN_2464061, ILMN_2588051, ILMN_1227164, ILMN_2588052, ILMN_1237773, ILMN_1215009, ILMN_2623184, ILMN_1245079, ILMN_12…	1937	274	16021	1.23764	1	0.999672	90.2691
Annotation Cluster 47	Enrichment Score: 1.7003587102103608
Category	Term	Count	%	PValue	Genes	List Total	Pop Hits	Pop Total	Fold Enrichment	Bonferroni	Benjamini	FDR
KEGG_PATHWAY	mmu05220:Chronic myeloid leukemia	19	0.92233	0.00142824	ILMN_2733514, ILMN_2732317, ILMN_2466845, ILMN_1250774, ILMN_2850753, ILMN_2649828, ILMN_2904321, ILMN_1245874, ILMN_1213055, ILMN_2747229, ILMN_1223624, ILMN_2589556, ILMN_2592476, ILMN_2938893, ILMN_1226157, ILMN_2668165, ILMN_2601071, ILMN_2679619, ILMN_2976191, ILMN_2630423, ILMN_2957070, ILMN_2743723, ILMN_2738699	643	76	5738	2.23095	0.224625	0.0228627	1.74186
KEGG_PATHWAY	mmu05223:Non-small cell lung cancer	15	0.728155	0.00190369	ILMN_2732317, ILMN_2466845, ILMN_2825020, ILMN_2886828, ILMN_3004142, ILMN_2649828, ILMN_2904321, ILMN_1213055, ILMN_2747229, ILMN_1223624, ILMN_1226157, ILMN_2647435, ILMN_2601071, ILMN_1217890, ILMN_1232561, ILMN_2679619, ILMN_2593038	643	54	5738	2.47883	0.287645	0.023936	2.31549
KEGG_PATHWAY	mmu05215:Prostate cancer	20	0.970874	0.00434977	ILMN_2732317, ILMN_2717613, ILMN_1238221, ILMN_3109289, ILMN_2466845, ILMN_1250774, ILMN_2641647, ILMN_2850753, ILMN_2609887, ILMN_2618714, ILMN_2649828, ILMN_2904321, ILMN_1213055, ILMN_2747229, ILMN_1223624, ILMN_2589556, ILMN_2592476, ILMN_1226157, ILMN_1225565, ILMN_2770759, ILMN_2601071, ILMN_2679619, ILMN_2630423, ILMN_2756460	643	90	5738	1.98307	0.539733	0.0473395	5.2184
KEGG_PATHWAY	mmu05212:Pancreatic cancer	17	0.825243	0.00507846	ILMN_2732317, ILMN_2466845, ILMN_2450384, ILMN_2649828, ILMN_2904321, ILMN_1213055, ILMN_2747229, ILMN_2589556, ILMN_3121255, ILMN_2946862, ILMN_2592476, ILMN_2938893, ILMN_1226157, ILMN_2659616, ILMN_2591066, ILMN_1228414, ILMN_2601071, ILMN_2679619, ILMN_2630423	643	72	5738	2.10701	0.595971	0.0519139	6.06773
KEGG_PATHWAY	mmu05221:Acute myeloid leukemia	14	0.679612	0.00881875	ILMN_2732317, ILMN_3109289, ILMN_2641647, ILMN_2649828, ILMN_2904321, ILMN_1247147, ILMN_1213055, ILMN_2747229, ILMN_2589556, ILMN_1223624, ILMN_2592476, ILMN_1226157, ILMN_2601071, ILMN_2976191, ILMN_2630423, ILMN_2756460	643	57	5738	2.19181	0.793344	0.0691603	10.3183
KEGG_PATHWAY	mmu05214:Glioma	15	0.728155	0.00979257	ILMN_2732317, ILMN_2466845, ILMN_1250774, ILMN_2850753, ILMN_2649828, ILMN_2618714, ILMN_2904321, ILMN_1213055, ILMN_2747229, ILMN_1223624, ILMN_1215681, ILMN_1226157, ILMN_1225565, ILMN_2601071, ILMN_1217890, ILMN_2679619, ILMN_2756460, ILMN_2957070	643	64	5738	2.09151	0.826516	0.0733316	11.3955
KEGG_PATHWAY	mmu05213:Endometrial cancer	12	0.582524	0.0263635	ILMN_2732317, ILMN_2466845, ILMN_3109289, ILMN_2641647, ILMN_2649828, ILMN_2904321, ILMN_1213055, ILMN_2655204, ILMN_2747229, ILMN_1223624, ILMN_2736999, ILMN_1226157, ILMN_2780205, ILMN_2601071, ILMN_2842137	643	52	5738	2.05934	0.991397	0.130531	27.9979
KEGG_PATHWAY	mmu05210:Colorectal cancer	16	0.776699	0.0526338	ILMN_2732317, ILMN_3109289, ILMN_2466845, ILMN_2641647, ILMN_2828877, ILMN_2649828, ILMN_2904321, ILMN_2655204, ILMN_1213055, ILMN_2747229, ILMN_2907560, ILMN_1228762, ILMN_2938893, ILMN_1226157, ILMN_2659616, ILMN_2591066, ILMN_1228414, ILMN_2601071	643	86	5738	1.66024	0.999934	0.218687	48.5602
KEGG_PATHWAY	mmu04012:ErbB signaling pathway	16	0.776699	0.0573374	ILMN_2732317, ILMN_2920549, ILMN_2649828, ILMN_2904321, ILMN_1213055, ILMN_2747229, ILMN_1223624, ILMN_3028981, ILMN_1226157, ILMN_2591066, ILMN_2640570, ILMN_1217890, ILMN_2615901, ILMN_2601071, ILMN_2976191, ILMN_2756460, ILMN_2957070, ILMN_2738699	643	87	5738	1.64116	0.999973	0.231072	51.6136
KEGG_PATHWAY	mmu04662:B cell receptor signaling pathway	15	0.728155	0.0584371	ILMN_2732317, ILMN_2649828, ILMN_2904321, ILMN_2971286, ILMN_1213055, ILMN_2747229, ILMN_2589556, ILMN_1223624, ILMN_2592476, ILMN_1226157, ILMN_2659616, ILMN_1250000, ILMN_2601071, ILMN_2630423, ILMN_2705003, ILMN_2953411, ILMN_2735633	643	80	5738	1.67321	0.999978	0.23004	52.303
KEGG_PATHWAY	mmu04660:T cell receptor signaling pathway	20	0.970874	0.0641697	ILMN_2732317, ILMN_2649828, ILMN_2724570, ILMN_2904321, ILMN_2971286, ILMN_1213055, ILMN_2747229, ILMN_1223624, ILMN_2589556, ILMN_2946862, ILMN_2592476, ILMN_3028981, ILMN_1226157, ILMN_2591066, ILMN_1250000, ILMN_2640570, ILMN_2601071, ILMN_2630423, ILMN_2705003, ILMN_2953411, ILMN_2738699, ILMN_2735633	643	118	5738	1.51251	0.999993	0.245028	55.7531
KEGG_PATHWAY	mmu05218:Melanoma	12	0.582524	0.164977	ILMN_2732317, ILMN_2466845, ILMN_1250774, ILMN_2850753, ILMN_2828877, ILMN_2618714, ILMN_2649828, ILMN_2904321, ILMN_1213055, ILMN_2747229, ILMN_1223624, ILMN_1226157, ILMN_1225565, ILMN_2601071, ILMN_2679619	643	71	5738	1.50825	1	0.424965	89.1027
KEGG_PATHWAY	mmu04664:Fc epsilon RI signaling pathway	12	0.582524	0.307814	ILMN_2920549, ILMN_2732317, ILMN_2649828, ILMN_2904321, ILMN_2724570, ILMN_1213055, ILMN_1223624, ILMN_2747229, ILMN_3028981, ILMN_1226157, ILMN_2591066, ILMN_2659616, ILMN_1217890, ILMN_2601071	643	82	5738	1.30592	1	0.602413	98.9145
Annotation Cluster 48	Enrichment Score: 1.6021029507444604
Category	Term	Count	%	PValue	Genes	List Total	Pop Hits	Pop Total	Fold Enrichment	Bonferroni	Benjamini	FDR
GOTERM_BP_FAT	GO:0010605~negative regulation of macromolecule metabolic process	75	3.64078	0.00311841	ILMN_2616262, ILMN_2733514, ILMN_3147724, ILMN_3109289, ILMN_2715215, ILMN_2645074, ILMN_2705324, ILMN_1253012, ILMN_2623793, ILMN_2945275, ILMN_3055904, ILMN_2709397, ILMN_2648973, ILMN_2768330, ILMN_1232182, ILMN_2808336, ILMN_3007271, ILMN_2606873, ILMN_2592476, ILMN_2740523, ILMN_2705367, ILMN_2652187, ILMN_1217890, ILMN_2603660, ILMN_2698282, ILMN_3005669, ILMN_1213290, ILMN_2933431, ILMN_24…	1454	506	13588	1.38517	0.999959	0.113265	5.51306
GOTERM_BP_FAT	GO:0010629~negative regulation of gene expression	60	2.91262	0.0107691	ILMN_2616262, ILMN_2733514, ILMN_3147724, ILMN_3109289, ILMN_2645074, ILMN_2705324, ILMN_1253012, ILMN_2623793, ILMN_2945275, ILMN_3055904, ILMN_2648973, ILMN_2768330, ILMN_1232182, ILMN_2808336, ILMN_3007271, ILMN_2606873, ILMN_2592476, ILMN_2740523, ILMN_2705367, ILMN_2652187, ILMN_2603660, ILMN_3005669, ILMN_1213290, ILMN_2667889, ILMN_2466845, ILMN_2873174, ILMN_2440803, ILMN_2842767, ILMN_29…	1454	410	13588	1.3676	1	0.279026	17.8474
GOTERM_BP_FAT	GO:0010558~negative regulation of macromolecule biosynthetic process	60	2.91262	0.0158159	ILMN_2616262, ILMN_2733514, ILMN_3147724, ILMN_3109289, ILMN_2715215, ILMN_2645074, ILMN_2705324, ILMN_2623793, ILMN_2945275, ILMN_2709397, ILMN_3055904, ILMN_2768330, ILMN_1232182, ILMN_2808336, ILMN_3007271, ILMN_2606873, ILMN_2592476, ILMN_2740523, ILMN_2705367, ILMN_2652187, ILMN_2603660, ILMN_3005669, ILMN_1213290, ILMN_2667889, ILMN_2466845, ILMN_2873174, ILMN_2842767, ILMN_2930707, ILMN_12…	1454	418	13588	1.34142	1	0.349174	25.1332
GOTERM_BP_FAT	GO:0016481~negative regulation of transcription	53	2.57282	0.0262157	ILMN_2616262, ILMN_2733514, ILMN_3109289, ILMN_3147724, ILMN_2645074, ILMN_2705324, ILMN_2623793, ILMN_2945275, ILMN_3055904, ILMN_2768330, ILMN_1232182, ILMN_3007271, ILMN_2808336, ILMN_2606873, ILMN_2592476, ILMN_2740523, ILMN_2705367, ILMN_2652187, ILMN_2603660, ILMN_3005669, ILMN_1213290, ILMN_2667889, ILMN_2466845, ILMN_2873174, ILMN_2842767, ILMN_2930707, ILMN_1228568, ILMN_1251165, ILMN_28…	1454	372	13588	1.33145	1	0.468214	38.2663
GOTERM_BP_FAT	GO:0031327~negative regulation of cellular biosynthetic process	60	2.91262	0.0265096	ILMN_2616262, ILMN_2733514, ILMN_3147724, ILMN_3109289, ILMN_2715215, ILMN_2645074, ILMN_2705324, ILMN_2623793, ILMN_2945275, ILMN_2709397, ILMN_3055904, ILMN_2768330, ILMN_1232182, ILMN_2808336, ILMN_3007271, ILMN_2606873, ILMN_2592476, ILMN_2740523, ILMN_2705367, ILMN_2652187, ILMN_2603660, ILMN_3005669, ILMN_1213290, ILMN_2667889, ILMN_2466845, ILMN_2873174, ILMN_2842767, ILMN_2930707, ILMN_12…	1454	430	13588	1.30399	1	0.467108	38.6038
GOTERM_BP_FAT	GO:0045934~negative regulation of nucleobase, nucleoside, nucleotide and nucleic acid metabolic process	56	2.71845	0.0268059	ILMN_2616262, ILMN_2733514, ILMN_3109289, ILMN_3147724, ILMN_2645074, ILMN_2705324, ILMN_2623793, ILMN_2945275, ILMN_3055904, ILMN_2768330, ILMN_1232182, ILMN_2808336, ILMN_3007271, ILMN_2606873, ILMN_2592476, ILMN_2740523, ILMN_2705367, ILMN_2652187, ILMN_2603660, ILMN_2698282, ILMN_3005669, ILMN_1213290, ILMN_2667889, ILMN_2466845, ILMN_2873174, ILMN_2842767, ILMN_2930707, ILMN_1228568, ILMN_12…	1454	397	13588	1.31822	1	0.468465	38.9422
GOTERM_MF_FAT	GO:0016564~transcription repressor activity	32	1.5534	0.0307572	ILMN_2733514, ILMN_1255644, ILMN_3124947, ILMN_2705324, ILMN_2623793, ILMN_3055904, ILMN_2808336, ILMN_2592476, ILMN_2635516, ILMN_2740523, ILMN_2652187, ILMN_2992232, ILMN_2691192, ILMN_2950286, ILMN_1213290, ILMN_1219275, ILMN_2768755, ILMN_2896229, ILMN_2842767, ILMN_1228568, ILMN_1251165, ILMN_2659160, ILMN_1220617, ILMN_2645439, ILMN_1240620, ILMN_2592059, ILMN_2703082, ILMN_1252078, ILMN_12…	1385	211	13288	1.45505	1	0.45133	39.2372
GOTERM_BP_FAT	GO:0009890~negative regulation of biosynthetic process	60	2.91262	0.0311733	ILMN_2616262, ILMN_2733514, ILMN_3147724, ILMN_3109289, ILMN_2715215, ILMN_2645074, ILMN_2705324, ILMN_2623793, ILMN_2945275, ILMN_2709397, ILMN_3055904, ILMN_2768330, ILMN_1232182, ILMN_2808336, ILMN_3007271, ILMN_2606873, ILMN_2592476, ILMN_2740523, ILMN_2705367, ILMN_2652187, ILMN_2603660, ILMN_3005669, ILMN_1213290, ILMN_2667889, ILMN_2466845, ILMN_2873174, ILMN_2842767, ILMN_2930707, ILMN_12…	1454	434	13588	1.29197	1	0.497	43.7304
GOTERM_BP_FAT	GO:0051172~negative regulation of nitrogen compound metabolic process	56	2.71845	0.0315115	ILMN_2616262, ILMN_2733514, ILMN_3109289, ILMN_3147724, ILMN_2645074, ILMN_2705324, ILMN_2623793, ILMN_2945275, ILMN_3055904, ILMN_2768330, ILMN_1232182, ILMN_2808336, ILMN_3007271, ILMN_2606873, ILMN_2592476, ILMN_2740523, ILMN_2705367, ILMN_2652187, ILMN_2603660, ILMN_2698282, ILMN_3005669, ILMN_1213290, ILMN_2667889, ILMN_2466845, ILMN_2873174, ILMN_2842767, ILMN_2930707, ILMN_1228568, ILMN_12…	1454	401	13588	1.30507	1	0.498479	44.0859
GOTERM_BP_FAT	GO:0051253~negative regulation of RNA metabolic process	44	2.13592	0.0447734	ILMN_2616262, ILMN_2733514, ILMN_1255644, ILMN_3109289, ILMN_1218384, ILMN_3147724, ILMN_2886828, ILMN_3124947, ILMN_2705324, ILMN_2623793, ILMN_2945275, ILMN_3055904, ILMN_2768330, ILMN_1212636, ILMN_1232182, ILMN_3007271, ILMN_2592476, ILMN_1252310, ILMN_2635516, ILMN_2705367, ILMN_2652187, ILMN_2730498, ILMN_2603660, ILMN_2992232, ILMN_2698282, ILMN_2691192, ILMN_1213290, ILMN_1219275, ILMN_26…	1454	310	13588	1.32642	1	0.585841	56.4691
GOTERM_BP_FAT	GO:0045892~negative regulation of transcription, DNA-dependent	43	2.08738	0.0586743	ILMN_2616262, ILMN_2733514, ILMN_1255644, ILMN_3109289, ILMN_1218384, ILMN_3147724, ILMN_2886828, ILMN_3124947, ILMN_2705324, ILMN_2623793, ILMN_2945275, ILMN_3055904, ILMN_2768330, ILMN_1212636, ILMN_1232182, ILMN_3007271, ILMN_2592476, ILMN_1252310, ILMN_2635516, ILMN_2705367, ILMN_2652187, ILMN_2730498, ILMN_2603660, ILMN_2992232, ILMN_2691192, ILMN_1213290, ILMN_1219275, ILMN_2667889, ILMN_24…	1454	308	13588	1.30469	1	0.640662	66.6417
GOTERM_BP_FAT	GO:0000122~negative regulation of transcription from RNA polymerase II promoter	33	1.60194	0.0758048	ILMN_2616262, ILMN_2733514, ILMN_1255644, ILMN_3147724, ILMN_1218384, ILMN_2886828, ILMN_3124947, ILMN_2705324, ILMN_2623793, ILMN_2945275, ILMN_2768330, ILMN_1212636, ILMN_1232182, ILMN_2705367, ILMN_2652187, ILMN_2730498, ILMN_2603660, ILMN_2992232, ILMN_2691192, ILMN_1213290, ILMN_2466845, ILMN_1219275, ILMN_2768755, ILMN_1247147, ILMN_1228568, ILMN_1251165, ILMN_2837476, ILMN_2659160, ILMN_26…	1454	231	13588	1.33504	1	0.699464	76.1009
Annotation Cluster 49	Enrichment Score: 1.5843685318207876
Category	Term	Count	%	PValue	Genes	List Total	Pop Hits	Pop Total	Fold Enrichment	Bonferroni	Benjamini	FDR
SMART	SM00443:G_patch	7	0.339806	0.0225844	ILMN_2996046, ILMN_2841032, ILMN_2651534, ILMN_2746924, ILMN_2591626, ILMN_1214110, ILMN_2604227, ILMN_2942492	960	22	9131	3.02637	0.999678	0.552503	26.8522
INTERPRO	IPR000467:D111/G-patch	7	0.339806	0.023173	ILMN_2996046, ILMN_2841032, ILMN_2651534, ILMN_2746924, ILMN_2591626, ILMN_1214110, ILMN_2604227, ILMN_2942492	1876	22	17763	3.01272	1	0.751298	33.7128
UP_SEQ_FEATURE	domain:G-patch	7	0.339806	0.0337368	ILMN_2996046, ILMN_2841032, ILMN_2651534, ILMN_2746924, ILMN_2591626, ILMN_1214110, ILMN_2604227, ILMN_2942492	1937	21	16021	2.75701	1	0.986798	47.1845
Annotation Cluster 50	Enrichment Score: 1.5688084378290967
Category	Term	Count	%	PValue	Genes	List Total	Pop Hits	Pop Total	Fold Enrichment	Bonferroni	Benjamini	FDR
INTERPRO	IPR006012:Syntaxin/epimorphin, conserved site	7	0.339806	0.00295736	ILMN_2645255, ILMN_2730532, ILMN_2822053, ILMN_1255725, ILMN_2421431, ILMN_3141830, ILMN_2710544, ILMN_2612350	1876	15	17763	4.41866	0.999116	0.394819	5.06151
GOTERM_MF_FAT	GO:0005484~SNAP receptor activity	7	0.339806	0.00402561	ILMN_2645255, ILMN_2730532, ILMN_2822053, ILMN_1255725, ILMN_2421431, ILMN_3141830, ILMN_2710544, ILMN_2612350	1385	16	13288	4.19747	0.986967	0.126838	6.23014
KEGG_PATHWAY	mmu04130:SNARE interactions in vesicular transport	11	0.533981	0.00735554	ILMN_2645255, ILMN_2710151, ILMN_2822053, ILMN_2730532, ILMN_2421431, ILMN_3141830, ILMN_2710544, ILMN_2480543, ILMN_2612350, ILMN_1255725, ILMN_2814976, ILMN_2516348, ILMN_1246405	643	38	5738	2.5832	0.731291	0.0668269	8.67695
UP_SEQ_FEATURE	domain:t-SNARE coiled-coil homology	7	0.339806	0.0267572	ILMN_2645255, ILMN_2730532, ILMN_2822053, ILMN_1255725, ILMN_2421431, ILMN_3141830, ILMN_2710544, ILMN_2612350	1937	20	16021	2.89486	1	0.991418	39.6185
SMART	SM00397:t_SNARE	7	0.339806	0.0409244	ILMN_2645255, ILMN_2710151, ILMN_2730532, ILMN_2822053, ILMN_1255725, ILMN_2421431, ILMN_3141830, ILMN_2710544	960	25	9131	2.66321	1	0.677425	43.559
INTERPRO	IPR000727:Target SNARE coiled-coil region	7	0.339806	0.0419119	ILMN_2645255, ILMN_2710151, ILMN_2730532, ILMN_2822053, ILMN_1255725, ILMN_2421431, ILMN_3141830, ILMN_2710544	1876	25	17763	2.65119	1	0.884979	52.8043
SMART	SM00503:SynN	4	0.194175	0.100451	ILMN_2645255, ILMN_2822053, ILMN_1255725, ILMN_2421431	960	11	9131	3.45871	1	0.802131	76.5214
INTERPRO	IPR006011:Syntaxin, N-terminal	4	0.194175	0.101702	ILMN_2645255, ILMN_2822053, ILMN_1255725, ILMN_2421431	1876	11	17763	3.44311	1	0.972296	84.7551
UP_SEQ_FEATURE	topological domain:Vesicular	8	0.38835	0.185067	ILMN_2645255, ILMN_2730532, ILMN_1255725, ILMN_2421431, ILMN_3141830, ILMN_2516348, ILMN_2710544, ILMN_2480543, ILMN_1244848	1937	39	16021	1.69662	1	0.999978	97.7778
Annotation Cluster 51	Enrichment Score: 1.5323631257708952
Category	Term	Count	%	PValue	Genes	List Total	Pop Hits	Pop Total	Fold Enrichment	Bonferroni	Benjamini	FDR
GOTERM_MF_FAT	GO:0004468~lysine N-acetyltransferase activity	8	0.38835	0.00299069	ILMN_1215305, ILMN_2820297, ILMN_2719784, ILMN_2768330, ILMN_2665161, ILMN_2652749, ILMN_2839973, ILMN_1246873, ILMN_2633511	1385	20	13288	3.83769	0.960157	0.09874	4.66418
GOTERM_MF_FAT	GO:0004402~histone acetyltransferase activity	8	0.38835	0.00299069	ILMN_1215305, ILMN_2820297, ILMN_2719784, ILMN_2768330, ILMN_2665161, ILMN_2652749, ILMN_2839973, ILMN_1246873, ILMN_2633511	1385	20	13288	3.83769	0.960157	0.09874	4.66418
GOTERM_MF_FAT	GO:0016407~acetyltransferase activity	14	0.679612	0.0118217	ILMN_2478523, ILMN_2820297, ILMN_2634749, ILMN_2724191, ILMN_1244030, ILMN_2768330, ILMN_2839973, ILMN_2605941, ILMN_1253008, ILMN_1218612, ILMN_1215305, ILMN_2719784, ILMN_2665161, ILMN_2652749, ILMN_2945066, ILMN_1246873, ILMN_2633511	1385	63	13288	2.13205	0.999997	0.268089	17.2748
GOTERM_MF_FAT	GO:0008080~N-acetyltransferase activity	12	0.582524	0.0143057	ILMN_2478523, ILMN_2820297, ILMN_2634749, ILMN_2724191, ILMN_1244030, ILMN_2768330, ILMN_2839973, ILMN_1218612, ILMN_1215305, ILMN_2719784, ILMN_2665161, ILMN_2652749, ILMN_2945066, ILMN_1246873, ILMN_2633511	1385	51	13288	2.25746	1	0.291451	20.5295
GOTERM_MF_FAT	GO:0016410~N-acyltransferase activity	13	0.631068	0.0423589	ILMN_2478523, ILMN_2634749, ILMN_2820297, ILMN_2724191, ILMN_1244030, ILMN_2768330, ILMN_2839973, ILMN_1218612, ILMN_1215305, ILMN_2719784, ILMN_2665161, ILMN_2652749, ILMN_2945066, ILMN_2893992, ILMN_1246873, ILMN_2633511	1385	67	13288	1.86157	1	0.516972	49.8539
PIR_SUPERFAMILY	PIRSF001742:N-acetyltransferase complex, catalytic subunit	3	0.145631	0.0506442	ILMN_2478523, ILMN_2634749, ILMN_2724191, ILMN_2945066, ILMN_1218612	801	4	8136	7.61798	1	1	55.601
INTERPRO	IPR016181:Acyl-CoA N-acyltransferase	8	0.38835	0.0697874	ILMN_1215305, ILMN_2478523, ILMN_2634749, ILMN_2724191, ILMN_1244030, ILMN_2665161, ILMN_2652749, ILMN_2945066, ILMN_2839973, ILMN_1218612	1876	35	17763	2.16424	1	0.942865	71.8798
INTERPRO	IPR000182:GCN5-related N-acetyltransferase	7	0.339806	0.0785448	ILMN_1215305, ILMN_2478523, ILMN_2634749, ILMN_2820297, ILMN_2724191, ILMN_1244030, ILMN_2652749, ILMN_2945066, ILMN_1246873, ILMN_1218612	1876	29	17763	2.28551	1	0.956378	76.1782
SP_PIR_KEYWORDS	Acyltransferase	23	1.1165	0.120549	ILMN_2493874, ILMN_2820297, ILMN_2724191, ILMN_2739295, ILMN_1244030, ILMN_2807284, ILMN_2625342, ILMN_2839973, ILMN_2605941, ILMN_2703159, ILMN_2822229, ILMN_2665161, ILMN_2945066, ILMN_1246873, ILMN_2806188, ILMN_1214054, ILMN_1215722, ILMN_2980858, ILMN_2864906, ILMN_3095059, ILMN_1253008, ILMN_1215305, ILMN_2719784, ILMN_2655954, ILMN_2964608, ILMN_2633511	1951	155	17854	1.35792	1	0.517327	84.2657
UP_SEQ_FEATURE	domain:N-acetyltransferase	6	0.291262	0.22136	ILMN_1215305, ILMN_2820297, ILMN_2724191, ILMN_1244030, ILMN_2652749, ILMN_2945066, ILMN_1246873	1937	27	16021	1.83801	1	0.999991	99.0477
Annotation Cluster 52	Enrichment Score: 1.513110548554178
Category	Term	Count	%	PValue	Genes	List Total	Pop Hits	Pop Total	Fold Enrichment	Bonferroni	Benjamini	FDR
INTERPRO	IPR015338:EXTL2, alpha-1,4-N-acetylhexosaminyltransferase	4	0.194175	0.00996582	ILMN_2895364, ILMN_2731989, ILMN_3001452, ILMN_1213855	1876	5	17763	7.57484	1	0.660675	16.1088
GOTERM_MF_FAT	GO:0008375~acetylglucosaminyltransferase activity	9	0.436893	0.0209558	ILMN_2877507, ILMN_2811018, ILMN_2667234, ILMN_2895364, ILMN_2731989, ILMN_3001452, ILMN_2609073, ILMN_1213855, ILMN_2722353	1385	34	13288	2.53965	1	0.37796	28.6617
INTERPRO	IPR004263:Exostosin-like	3	0.145631	0.057797	ILMN_2895364, ILMN_2731989, ILMN_3001452	1876	4	17763	7.10141	1	0.937418	64.7982
KEGG_PATHWAY	mmu00534:Heparan sulfate biosynthesis	7	0.339806	0.0734237	ILMN_2811018, ILMN_2729706, ILMN_2895364, ILMN_2731989, ILMN_3001452, ILMN_1213855, ILMN_2832641	643	27	5738	2.31358	0.999999	0.250846	60.8419
Annotation Cluster 53	Enrichment Score: 1.5070967052537947
Category	Term	Count	%	PValue	Genes	List Total	Pop Hits	Pop Total	Fold Enrichment	Bonferroni	Benjamini	FDR
GOTERM_CC_FAT	GO:0005789~endoplasmic reticulum membrane	25	1.21359	0.022214	ILMN_1241908, ILMN_2506144, ILMN_1255423, ILMN_3001452, ILMN_1220769, ILMN_2796651, ILMN_2609495, ILMN_1237323, ILMN_2765304, ILMN_2695047, ILMN_1238081, ILMN_1218263, ILMN_2776025, ILMN_1244297, ILMN_3120797, ILMN_2904686, ILMN_2787085, ILMN_2718090, ILMN_2730532, ILMN_2605268, ILMN_2731989, ILMN_2838645, ILMN_2597686, ILMN_2895364, ILMN_2740372, ILMN_2677170, ILMN_1253348, ILMN_1213855	1289	152	12504	1.59548	0.999992	0.178451	27.799
GOTERM_CC_FAT	GO:0042175~nuclear envelope-endoplasmic reticulum network	26	1.26214	0.0224171	ILMN_1241908, ILMN_2506144, ILMN_1255423, ILMN_3001452, ILMN_1220769, ILMN_2796651, ILMN_2609495, ILMN_1237323, ILMN_2765304, ILMN_2695047, ILMN_1238081, ILMN_2845214, ILMN_1218263, ILMN_2776025, ILMN_1244297, ILMN_3120797, ILMN_2904686, ILMN_2787085, ILMN_2718090, ILMN_2730532, ILMN_2605268, ILMN_2731989, ILMN_2838645, ILMN_2597686, ILMN_2895364, ILMN_2740372, ILMN_2677170, ILMN_1253348, ILMN_12…	1289	160	12504	1.57634	0.999993	0.177272	28.0162
GOTERM_CC_FAT	GO:0031227~intrinsic to endoplasmic reticulum membrane	11	0.533981	0.0372656	ILMN_2718090, ILMN_2597686, ILMN_2895364, ILMN_2731989, ILMN_1255423, ILMN_3001452, ILMN_3120797, ILMN_1244297, ILMN_2838645, ILMN_1213855, ILMN_2609495	1289	52	12504	2.05204	1	0.260732	42.3422
GOTERM_CC_FAT	GO:0044432~endoplasmic reticulum part	33	1.60194	0.0504776	ILMN_2434503, ILMN_1241908, ILMN_1249836, ILMN_1228287, ILMN_1255423, ILMN_2506144, ILMN_1220769, ILMN_3001452, ILMN_2796651, ILMN_2609495, ILMN_2771956, ILMN_1237323, ILMN_2765304, ILMN_2660233, ILMN_2695047, ILMN_1249550, ILMN_1238081, ILMN_1218263, ILMN_3128019, ILMN_2776025, ILMN_1244297, ILMN_3120797, ILMN_2904686, ILMN_2787085, ILMN_2718090, ILMN_2730532, ILMN_2605268, ILMN_2731989, ILMN_29…	1289	231	12504	1.38579	1	0.310995	52.8106
Annotation Cluster 54	Enrichment Score: 1.4921924942698883
Category	Term	Count	%	PValue	Genes	List Total	Pop Hits	Pop Total	Fold Enrichment	Bonferroni	Benjamini	FDR
INTERPRO	IPR019954:Ubiquitin conserved site	9	0.436893	0.00856593	ILMN_2662743, ILMN_2469689, ILMN_1216295, ILMN_1256971, ILMN_3046846, ILMN_2605268, ILMN_2736975, ILMN_2479786, ILMN_1224117, ILMN_2637052, ILMN_2796353	1876	29	17763	2.93852	1	0.621875	14.0041
SMART	SM00213:UBQ	11	0.533981	0.0219157	ILMN_1216295, ILMN_1256971, ILMN_2605268, ILMN_1224117, ILMN_2796353, ILMN_2704509, ILMN_2712018, ILMN_2687706, ILMN_2662743, ILMN_3046846, ILMN_2736975, ILMN_2479786, ILMN_2637052	960	47	9131	2.22609	0.99959	0.579654	26.1642
INTERPRO	IPR000626:Ubiquitin	11	0.533981	0.0227711	ILMN_1216295, ILMN_1256971, ILMN_2605268, ILMN_1224117, ILMN_2796353, ILMN_2704509, ILMN_2712018, ILMN_2687706, ILMN_2662743, ILMN_3046846, ILMN_2736975, ILMN_2479786, ILMN_2637052	1876	47	17763	2.21604	1	0.75393	33.2329
INTERPRO	IPR019955:Ubiquitin supergroup	11	0.533981	0.0338822	ILMN_1216295, ILMN_1256971, ILMN_2605268, ILMN_1224117, ILMN_2796353, ILMN_2704509, ILMN_2712018, ILMN_2687706, ILMN_2662743, ILMN_3046846, ILMN_2736975, ILMN_2479786, ILMN_2637052	1876	50	17763	2.08308	1	0.837724	45.3653
SMART	SM00727:STI1	4	0.194175	0.0598382	ILMN_2662743, ILMN_1216295, ILMN_2605268, ILMN_2479786, ILMN_2637052, ILMN_2796353	960	9	9131	4.22731	1	0.764953	57.0278
INTERPRO	IPR006636:Heat shock chaperonin-binding	4	0.194175	0.0606412	ILMN_2662743, ILMN_1216295, ILMN_2605268, ILMN_2479786, ILMN_2637052, ILMN_2796353	1876	9	17763	4.20824	1	0.939318	66.616
UP_SEQ_FEATURE	domain:Ubiquitin-like	10	0.485437	0.0682373	ILMN_2662743, ILMN_2469689, ILMN_1216295, ILMN_2605268, ILMN_2736975, ILMN_2479786, ILMN_1224117, ILMN_2637052, ILMN_2796353, ILMN_2712018, ILMN_2704509, ILMN_2687706	1937	43	16021	1.9235	1	0.997684	73.1434
Annotation Cluster 55	Enrichment Score: 1.4330122368816691
Category	Term	Count	%	PValue	Genes	List Total	Pop Hits	Pop Total	Fold Enrichment	Bonferroni	Benjamini	FDR
GOTERM_BP_FAT	GO:0009411~response to UV	11	0.533981	0.00283645	ILMN_1254639, ILMN_2466845, ILMN_1230273, ILMN_1218154, ILMN_1259904, ILMN_2719001, ILMN_2935999, ILMN_2648548, ILMN_2901402, ILMN_2968807, ILMN_2741132	1454	35	13588	2.93708	0.999897	0.104741	5.02664
GOTERM_BP_FAT	GO:0006289~nucleotide-excision repair	8	0.38835	0.0134076	ILMN_2662743, ILMN_1216295, ILMN_2466845, ILMN_1230273, ILMN_1218154, ILMN_1259904, ILMN_2719001, ILMN_2637052, ILMN_2796353, ILMN_2741132	1454	25	13588	2.99048	1	0.318056	21.7362
GOTERM_BP_FAT	GO:0009628~response to abiotic stimulus	35	1.69903	0.0879494	ILMN_1254639, ILMN_2610835, ILMN_2933993, ILMN_2715215, ILMN_1253012, ILMN_2690506, ILMN_1215135, ILMN_2991107, ILMN_2719001, ILMN_3096335, ILMN_1214110, ILMN_2840213, ILMN_2741132, ILMN_2851288, ILMN_2711570, ILMN_1254154, ILMN_2659616, ILMN_1259904, ILMN_2651534, ILMN_1246701, ILMN_2837156, ILMN_2901402, ILMN_2648548, ILMN_2466845, ILMN_2762301, ILMN_2732689, ILMN_1230273, ILMN_2827036, ILMN_27…	1454	251	13588	1.30312	1	0.738331	81.2036
GOTERM_BP_FAT	GO:0009314~response to radiation	21	1.01942	0.127734	ILMN_1254639, ILMN_2610835, ILMN_2933993, ILMN_1215135, ILMN_2991107, ILMN_2719001, ILMN_3096335, ILMN_1214110, ILMN_2711570, ILMN_2741132, ILMN_1259904, ILMN_2651534, ILMN_2837156, ILMN_2648548, ILMN_2901402, ILMN_2466845, ILMN_2732689, ILMN_1230273, ILMN_2777598, ILMN_3079421, ILMN_1218154, ILMN_1216721, ILMN_2935999, ILMN_3158668, ILMN_2968807	1454	143	13588	1.37238	1	0.827999	91.6367
GOTERM_BP_FAT	GO:0009416~response to light stimulus	15	0.728155	0.160056	ILMN_1254639, ILMN_2466845, ILMN_1230273, ILMN_2777598, ILMN_1215135, ILMN_3096335, ILMN_2719001, ILMN_2741132, ILMN_3079421, ILMN_1259904, ILMN_1218154, ILMN_1216721, ILMN_2935999, ILMN_2648548, ILMN_2901402, ILMN_3158668, ILMN_2968807	1454	98	13588	1.4304	1	0.868457	95.7866
Annotation Cluster 56	Enrichment Score: 1.4103592559324485
Category	Term	Count	%	PValue	Genes	List Total	Pop Hits	Pop Total	Fold Enrichment	Bonferroni	Benjamini	FDR
INTERPRO	IPR011989:Armadillo-like helical	25	1.21359	0.00454981	ILMN_2764995, ILMN_2659108, ILMN_2690506, ILMN_1220398, ILMN_2655204, ILMN_2745354, ILMN_2606243, ILMN_2678269, ILMN_1235324, ILMN_2596412, ILMN_1253134, ILMN_2594971, ILMN_2756460, ILMN_2617265, ILMN_1227218, ILMN_1234604, ILMN_3135931, ILMN_2923599, ILMN_1255175, ILMN_1237891, ILMN_1253062, ILMN_2665948, ILMN_2642411, ILMN_3147944, ILMN_2953301, ILMN_2464553, ILMN_2735080	1876	130	17763	1.82088	0.99998	0.471027	7.68591
UP_SEQ_FEATURE	repeat:HEAT 3	12	0.582524	0.00783517	ILMN_2764995, ILMN_2596412, ILMN_2659108, ILMN_2891506, ILMN_2642411, ILMN_2690506, ILMN_2464553, ILMN_2606243, ILMN_2756460, ILMN_2678269, ILMN_2615601, ILMN_2617265	1937	41	16021	2.42079	1	0.912969	13.6115
INTERPRO	IPR000357:HEAT	12	0.582524	0.0100079	ILMN_2764995, ILMN_2659108, ILMN_2891506, ILMN_2642411, ILMN_2690506, ILMN_2464553, ILMN_2741872, ILMN_2930057, ILMN_2606243, ILMN_1259798, ILMN_2678269, ILMN_2615601	1876	48	17763	2.36714	1	0.645905	16.1713
UP_SEQ_FEATURE	repeat:HEAT 2	13	0.631068	0.0101555	ILMN_2659108, ILMN_2764995, ILMN_2891506, ILMN_2690506, ILMN_2606243, ILMN_2741872, ILMN_2678269, ILMN_2615601, ILMN_2596412, ILMN_2642411, ILMN_2464553, ILMN_2756460, ILMN_2617265	1937	48	16021	2.24007	1	0.935803	17.2931
UP_SEQ_FEATURE	repeat:HEAT 1	13	0.631068	0.0101555	ILMN_2659108, ILMN_2764995, ILMN_2891506, ILMN_2690506, ILMN_2606243, ILMN_2741872, ILMN_2678269, ILMN_2615601, ILMN_2596412, ILMN_2642411, ILMN_2464553, ILMN_2756460, ILMN_2617265	1937	48	16021	2.24007	1	0.935803	17.2931
UP_SEQ_FEATURE	repeat:HEAT 4	11	0.533981	0.0104329	ILMN_2764995, ILMN_2596412, ILMN_2659108, ILMN_2891506, ILMN_2690506, ILMN_2464553, ILMN_2606243, ILMN_2756460, ILMN_2678269, ILMN_2615601, ILMN_2617265	1937	37	16021	2.45896	1	0.917031	17.7232
UP_SEQ_FEATURE	repeat:HEAT 6	8	0.38835	0.0307808	ILMN_2764995, ILMN_2659108, ILMN_2690506, ILMN_2464553, ILMN_2606243, ILMN_2756460, ILMN_2678269, ILMN_2617265	1937	26	16021	2.54493	1	0.98508	44.0967
UP_SEQ_FEATURE	repeat:HEAT 5	8	0.38835	0.06234	ILMN_2764995, ILMN_2659108, ILMN_2690506, ILMN_2464553, ILMN_2606243, ILMN_2756460, ILMN_2678269, ILMN_2617265	1937	30	16021	2.20561	1	0.997268	69.7992
UP_SEQ_FEATURE	repeat:HEAT 12	4	0.194175	0.0846279	ILMN_2659108, ILMN_2464553, ILMN_2606243, ILMN_2617265	1937	9	16021	3.67602	1	0.998477	80.6945
UP_SEQ_FEATURE	repeat:HEAT 7	6	0.291262	0.100486	ILMN_2659108, ILMN_2464553, ILMN_2606243, ILMN_2756460, ILMN_2678269, ILMN_2617265	1937	21	16021	2.36315	1	0.999193	86.0522
UP_SEQ_FEATURE	repeat:HEAT 11	4	0.194175	0.11041	ILMN_2659108, ILMN_2464553, ILMN_2606243, ILMN_2617265	1937	10	16021	3.30842	1	0.999564	88.6529
UP_SEQ_FEATURE	repeat:HEAT 8	5	0.242718	0.118406	ILMN_2659108, ILMN_2464553, ILMN_2606243, ILMN_2678269, ILMN_2617265	1937	16	16021	2.5847	1	0.999646	90.4071
UP_SEQ_FEATURE	repeat:HEAT 10	4	0.194175	0.169199	ILMN_2659108, ILMN_2464553, ILMN_2606243, ILMN_2617265	1937	12	16021	2.75701	1	0.999953	96.819
UP_SEQ_FEATURE	repeat:HEAT 9	4	0.194175	0.20133	ILMN_2659108, ILMN_2464553, ILMN_2606243, ILMN_2617265	1937	13	16021	2.54493	1	0.999984	98.4726
UP_SEQ_FEATURE	repeat:HEAT 13	3	0.145631	0.250649	ILMN_2464553, ILMN_2606243, ILMN_2617265	1937	8	16021	3.10164	1	0.999996	99.5333
Annotation Cluster 57	Enrichment Score: 1.3893200418779181
Category	Term	Count	%	PValue	Genes	List Total	Pop Hits	Pop Total	Fold Enrichment	Bonferroni	Benjamini	FDR
INTERPRO	IPR000449:Ubiquitin-associated/translation elongation factor EF1B, N-terminal	10	0.485437	0.0153505	ILMN_1216295, ILMN_1223378, ILMN_2479024, ILMN_2605268, ILMN_2617925, ILMN_2796353, ILMN_2491654, ILMN_1253666, ILMN_2662743, ILMN_2598692, ILMN_2949605, ILMN_2479786, ILMN_2637052	1876	38	17763	2.49172	1	0.694152	23.7607
SMART	SM00165:UBA	11	0.533981	0.016344	ILMN_1216295, ILMN_1223378, ILMN_2479024, ILMN_2605268, ILMN_2617925, ILMN_2796353, ILMN_2491654, ILMN_1253666, ILMN_2662743, ILMN_2598692, ILMN_2949605, ILMN_2479786, ILMN_2637052, ILMN_1259356	960	45	9131	2.32502	0.996974	0.515712	20.1939
INTERPRO	IPR015940:Ubiquitin-associated/translation elongation factor EF1B, N-terminal, eukaryote	11	0.533981	0.0170075	ILMN_1216295, ILMN_1223378, ILMN_2479024, ILMN_2605268, ILMN_2617925, ILMN_2796353, ILMN_2491654, ILMN_1253666, ILMN_2662743, ILMN_2598692, ILMN_2949605, ILMN_2479786, ILMN_2637052, ILMN_1259356	1876	45	17763	2.31453	1	0.708884	25.9797
SMART	SM00727:STI1	4	0.194175	0.0598382	ILMN_2662743, ILMN_1216295, ILMN_2605268, ILMN_2479786, ILMN_2637052, ILMN_2796353	960	9	9131	4.22731	1	0.764953	57.0278
INTERPRO	IPR006636:Heat shock chaperonin-binding	4	0.194175	0.0606412	ILMN_2662743, ILMN_1216295, ILMN_2605268, ILMN_2479786, ILMN_2637052, ILMN_2796353	1876	9	17763	4.20824	1	0.939318	66.616
UP_SEQ_FEATURE	domain:UBA	8	0.38835	0.297998	ILMN_1223378, ILMN_2598692, ILMN_2949605, ILMN_2479024, ILMN_2617925, ILMN_2605268, ILMN_2479786, ILMN_2491654, ILMN_1259356	1937	45	16021	1.47041	1	0.999999	99.8614
Annotation Cluster 58	Enrichment Score: 1.3506741426476292
Category	Term	Count	%	PValue	Genes	List Total	Pop Hits	Pop Total	Fold Enrichment	Bonferroni	Benjamini	FDR
GOTERM_BP_FAT	GO:0030099~myeloid cell differentiation	19	0.92233	0.0123976	ILMN_2941992, ILMN_1215252, ILMN_2960750, ILMN_2763602, ILMN_2792268, ILMN_3052632, ILMN_2792267, ILMN_2865558, ILMN_1247147, ILMN_2780759, ILMN_2665063, ILMN_3121255, ILMN_2623867, ILMN_2893077, ILMN_1229545, ILMN_3155789, ILMN_3107228, ILMN_3033533, ILMN_2679619, ILMN_3097868, ILMN_1245579, ILMN_2749937	1454	96	13588	1.84958	1	0.300172	20.2686
GOTERM_BP_FAT	GO:0048872~homeostasis of number of cells	19	0.92233	0.0546694	ILMN_1215252, ILMN_2763602, ILMN_2740852, ILMN_3052632, ILMN_2780759, ILMN_2507286, ILMN_2589556, ILMN_2665063, ILMN_3121255, ILMN_2837476, ILMN_2496682, ILMN_2893077, ILMN_3155789, ILMN_2668165, ILMN_3107228, ILMN_3033533, ILMN_2679619, ILMN_2976191, ILMN_2630423, ILMN_2705003	1454	113	13588	1.57133	1	0.621668	63.9686
GOTERM_BP_FAT	GO:0030218~erythrocyte differentiation	10	0.485437	0.0653777	ILMN_1215252, ILMN_2893077, ILMN_3155789, ILMN_2763602, ILMN_3107228, ILMN_3052632, ILMN_3033533, ILMN_2679619, ILMN_2780759, ILMN_2665063, ILMN_3121255	1454	48	13588	1.94693	1	0.666613	70.7013
GOTERM_BP_FAT	GO:0034101~erythrocyte homeostasis	10	0.485437	0.0892877	ILMN_1215252, ILMN_2893077, ILMN_3155789, ILMN_2763602, ILMN_3107228, ILMN_3052632, ILMN_3033533, ILMN_2679619, ILMN_2780759, ILMN_2665063, ILMN_3121255	1454	51	13588	1.8324	1	0.742297	81.6981
Annotation Cluster 59	Enrichment Score: 1.3405363848878193
Category	Term	Count	%	PValue	Genes	List Total	Pop Hits	Pop Total	Fold Enrichment	Bonferroni	Benjamini	FDR
GOTERM_BP_FAT	GO:0051329~interphase of mitotic cell cycle	11	0.533981	0.0322015	ILMN_1250774, ILMN_2850753, ILMN_1237773, ILMN_2971286, ILMN_2692110, ILMN_1249242, ILMN_2893077, ILMN_2995129, ILMN_1214179, ILMN_2679619, ILMN_2734152, ILMN_2791963, ILMN_2794796	1454	49	13588	2.09791	1	0.501518	44.8048
GOTERM_BP_FAT	GO:0051325~interphase	11	0.533981	0.0412586	ILMN_1250774, ILMN_2850753, ILMN_1237773, ILMN_2971286, ILMN_2692110, ILMN_1249242, ILMN_2893077, ILMN_2995129, ILMN_1214179, ILMN_2679619, ILMN_2734152, ILMN_2791963, ILMN_2794796	1454	51	13588	2.01564	1	0.566429	53.4673
GOTERM_BP_FAT	GO:0000082~G1/S transition of mitotic cell cycle	7	0.339806	0.0716143	ILMN_2893077, ILMN_2995129, ILMN_1237773, ILMN_2971286, ILMN_2791963, ILMN_2734152, ILMN_2679619, ILMN_2794796	1454	28	13588	2.33631	1	0.686692	74.0549
Annotation Cluster 60	Enrichment Score: 1.3382896230805499
Category	Term	Count	%	PValue	Genes	List Total	Pop Hits	Pop Total	Fold Enrichment	Bonferroni	Benjamini	FDR
GOTERM_CC_FAT	GO:0030117~membrane coat	16	0.776699	0.000597208	ILMN_2944646, ILMN_1248850, ILMN_1237090, ILMN_2745354, ILMN_2604688, ILMN_1240590, ILMN_1244074, ILMN_1237891, ILMN_2681906, ILMN_2630767, ILMN_2630768, ILMN_2596412, ILMN_1216919, ILMN_2695718, ILMN_2854878, ILMN_3147944, ILMN_2953301, ILMN_3143246, ILMN_2862093, ILMN_2805071	1289	58	12504	2.67601	0.269209	0.00892076	0.86242
GOTERM_CC_FAT	GO:0048475~coated membrane	16	0.776699	0.000597208	ILMN_2944646, ILMN_1248850, ILMN_1237090, ILMN_2745354, ILMN_2604688, ILMN_1240590, ILMN_1244074, ILMN_1237891, ILMN_2681906, ILMN_2630767, ILMN_2630768, ILMN_2596412, ILMN_1216919, ILMN_2695718, ILMN_2854878, ILMN_3147944, ILMN_2953301, ILMN_3143246, ILMN_2862093, ILMN_2805071	1289	58	12504	2.67601	0.269209	0.00892076	0.86242
SMART	SM00809:Alpha_adaptinC2	6	0.291262	0.00110954	ILMN_2695718, ILMN_1248850, ILMN_3147944, ILMN_2745354, ILMN_2604688, ILMN_3143246, ILMN_1237891	960	9	9131	6.34097	0.323467	0.0930732	1.50813
INTERPRO	IPR008152:Clathrin adaptor, alpha/beta/gamma-adaptin, appendage, Ig-like subdomain	6	0.291262	0.00113987	ILMN_2695718, ILMN_1248850, ILMN_3147944, ILMN_2745354, ILMN_2604688, ILMN_3143246, ILMN_1237891	1876	9	17763	6.31237	0.933303	0.201989	1.98029
INTERPRO	IPR002553:Clathrin/coatomer adaptor, adaptin-like, N-terminal	6	0.291262	0.0115364	ILMN_2596412, ILMN_3147944, ILMN_2953301, ILMN_2745354, ILMN_2604688, ILMN_3143246, ILMN_1237891	1876	14	17763	4.05795	1	0.653365	18.4124
GOTERM_CC_FAT	GO:0030126~COPI vesicle coat	5	0.242718	0.0141455	ILMN_2630767, ILMN_2630768, ILMN_2596412, ILMN_2944646, ILMN_1237090, ILMN_2862093, ILMN_2681906	1289	10	12504	4.85027	0.999435	0.125026	18.6625
GOTERM_CC_FAT	GO:0030663~COPI coated vesicle membrane	5	0.242718	0.0141455	ILMN_2630767, ILMN_2630768, ILMN_2596412, ILMN_2944646, ILMN_1237090, ILMN_2862093, ILMN_2681906	1289	10	12504	4.85027	0.999435	0.125026	18.6625
GOTERM_CC_FAT	GO:0030137~COPI-coated vesicle	5	0.242718	0.0282146	ILMN_2630767, ILMN_2630768, ILMN_2596412, ILMN_2944646, ILMN_1237090, ILMN_2862093, ILMN_2681906	1289	12	12504	4.04189	1	0.215218	33.964
GOTERM_CC_FAT	GO:0030120~vesicle coat	7	0.339806	0.061746	ILMN_2630767, ILMN_2630768, ILMN_2596412, ILMN_2944646, ILMN_1216919, ILMN_2854878, ILMN_1237090, ILMN_1240590, ILMN_2862093, ILMN_2681906	1289	28	12504	2.42514	1	0.341808	60.3111
INTERPRO	IPR008153:Clathrin adaptor, gamma-adaptin, appendage	3	0.145631	0.0896844	ILMN_2695718, ILMN_1248850, ILMN_2745354	1876	5	17763	5.68113	1	0.964186	80.7541
GOTERM_CC_FAT	GO:0030119~AP-type membrane coat adaptor complex	6	0.291262	0.107755	ILMN_2695718, ILMN_1248850, ILMN_3147944, ILMN_2745354, ILMN_2604688, ILMN_3143246, ILMN_1237891	1289	25	12504	2.32813	1	0.460488	80.8549
GOTERM_CC_FAT	GO:0030131~clathrin adaptor complex	6	0.291262	0.107755	ILMN_2695718, ILMN_1248850, ILMN_3147944, ILMN_2745354, ILMN_2604688, ILMN_3143246, ILMN_1237891	1289	25	12504	2.32813	1	0.460488	80.8549
UP_SEQ_FEATURE	domain:GAE	3	0.145631	0.113803	ILMN_2695718, ILMN_1248850, ILMN_2745354	1937	5	16021	4.96262	1	0.999615	89.4315
GOTERM_CC_FAT	GO:0030118~clathrin coat	7	0.339806	0.1313	ILMN_2695718, ILMN_1248850, ILMN_2854878, ILMN_3147944, ILMN_2745354, ILMN_2604688, ILMN_1240590, ILMN_3143246, ILMN_1237891	1289	34	12504	1.99717	1	0.512006	87.0083
GOTERM_CC_FAT	GO:0030660~Golgi-associated vesicle membrane	5	0.242718	0.164013	ILMN_2630767, ILMN_2630768, ILMN_2596412, ILMN_2944646, ILMN_1237090, ILMN_2862093, ILMN_2681906	1289	21	12504	2.30965	1	0.568172	92.5534
GOTERM_CC_FAT	GO:0030662~coated vesicle membrane	8	0.38835	0.302475	ILMN_2630767, ILMN_2630768, ILMN_2596412, ILMN_2944646, ILMN_1216919, ILMN_2854878, ILMN_1237090, ILMN_1228796, ILMN_1240590, ILMN_2862093, ILMN_2681906	1289	53	12504	1.46423	1	0.769153	99.4608
GOTERM_CC_FAT	GO:0005798~Golgi-associated vesicle	6	0.291262	0.310904	ILMN_2630767, ILMN_2630768, ILMN_2596412, ILMN_2944646, ILMN_1237090, ILMN_2862093, ILMN_1253410, ILMN_2681906	1289	36	12504	1.61676	1	0.772598	99.548
GOTERM_CC_FAT	GO:0030659~cytoplasmic vesicle membrane	10	0.485437	0.546662	ILMN_2944646, ILMN_3034877, ILMN_1237090, ILMN_1240590, ILMN_2681906, ILMN_2630767, ILMN_2596412, ILMN_2630768, ILMN_1216919, ILMN_2854878, ILMN_2670778, ILMN_1228796, ILMN_2763867, ILMN_2862093	1289	87	12504	1.115	1	0.920543	99.999
GOTERM_CC_FAT	GO:0044433~cytoplasmic vesicle part	10	0.485437	0.654808	ILMN_2944646, ILMN_3034877, ILMN_1237090, ILMN_1240590, ILMN_2681906, ILMN_2630767, ILMN_2596412, ILMN_2630768, ILMN_1216919, ILMN_2854878, ILMN_2670778, ILMN_1228796, ILMN_2763867, ILMN_2862093	1289	95	12504	1.02111	1	0.957358	100
GOTERM_CC_FAT	GO:0012506~vesicle membrane	10	0.485437	0.679407	ILMN_2944646, ILMN_3034877, ILMN_1237090, ILMN_1240590, ILMN_2681906, ILMN_2630767, ILMN_2596412, ILMN_2630768, ILMN_1216919, ILMN_2854878, ILMN_2670778, ILMN_1228796, ILMN_2763867, ILMN_2862093	1289	97	12504	1.00006	1	0.961063	100
GOTERM_CC_FAT	GO:0030135~coated vesicle	12	0.582524	0.74321	ILMN_2790573, ILMN_1244874, ILMN_2944646, ILMN_1237090, ILMN_2745354, ILMN_1240590, ILMN_2681906, ILMN_2630767, ILMN_2596412, ILMN_2630768, ILMN_1216919, ILMN_2854878, ILMN_1228796, ILMN_2706232, ILMN_2862093, ILMN_1255745	1289	124	12504	0.938762	1	0.97755	100
Annotation Cluster 61	Enrichment Score: 1.336196986489549
Category	Term	Count	%	PValue	Genes	List Total	Pop Hits	Pop Total	Fold Enrichment	Bonferroni	Benjamini	FDR
KEGG_PATHWAY	mmu03022:Basal transcription factors	9	0.436893	0.0258142	ILMN_2995129, ILMN_2997308, ILMN_2826161, ILMN_2742455, ILMN_2749847, ILMN_2869461, ILMN_2946281, ILMN_2736611, ILMN_1252302	643	33	5738	2.43376	0.990489	0.13157	27.4969
GOTERM_BP_FAT	GO:0006367~transcription initiation from RNA polymerase II promoter	6	0.291262	0.0363219	ILMN_1229545, ILMN_2742455, ILMN_2749847, ILMN_2869461, ILMN_2946281, ILMN_2736611, ILMN_2749937	1454	18	13588	3.11508	1	0.528714	48.9192
GOTERM_BP_FAT	GO:0006352~transcription initiation	9	0.436893	0.0386854	ILMN_1229545, ILMN_2995129, ILMN_2826161, ILMN_2742455, ILMN_2749847, ILMN_2869461, ILMN_2946281, ILMN_2736611, ILMN_1252302, ILMN_2749937	1454	37	13588	2.27317	1	0.549415	51.1467
GOTERM_CC_FAT	GO:0005669~transcription factor TFIID complex	5	0.242718	0.124635	ILMN_2995129, ILMN_2826161, ILMN_2869461, ILMN_2946281, ILMN_1252302	1289	19	12504	2.55277	1	0.495983	85.4858
Annotation Cluster 62	Enrichment Score: 1.3121713472922027
Category	Term	Count	%	PValue	Genes	List Total	Pop Hits	Pop Total	Fold Enrichment	Bonferroni	Benjamini	FDR
GOTERM_MF_FAT	GO:0008135~translation factor activity, nucleic acid binding	22	1.06796	0.000987354	ILMN_1243395, ILMN_2715215, ILMN_2709397, ILMN_2678828, ILMN_2462448, ILMN_2995755, ILMN_2642063, ILMN_2726950, ILMN_1377920, ILMN_2652394, ILMN_2892376, ILMN_2924030, ILMN_2774163, ILMN_2624018, ILMN_2762301, ILMN_2646556, ILMN_2588052, ILMN_2814333, ILMN_2593993, ILMN_2968032, ILMN_2930364, ILMN_2791578, ILMN_1229042, ILMN_2669441, ILMN_2686044, ILMN_2604097	1385	98	13288	2.15381	0.654554	0.0433219	1.56299
GOTERM_MF_FAT	GO:0003743~translation initiation factor activity	11	0.533981	0.106549	ILMN_1243395, ILMN_2774163, ILMN_2726950, ILMN_2762301, ILMN_2715215, ILMN_2814333, ILMN_2709397, ILMN_2892376, ILMN_2593993, ILMN_2968032, ILMN_2924030	1385	62	13288	1.7022	1	0.743875	83.4149
GOTERM_BP_FAT	GO:0006413~translational initiation	7	0.339806	0.215803	ILMN_2774163, ILMN_2762301, ILMN_2715215, ILMN_2814333, ILMN_2593993, ILMN_2968032, ILMN_2924030	1454	38	13588	1.72149	1	0.920757	98.7891
SP_PIR_KEYWORDS	Initiation factor	9	0.436893	0.248448	ILMN_1243395, ILMN_2774163, ILMN_2726950, ILMN_2762301, ILMN_2715215, ILMN_2709397, ILMN_2892376, ILMN_2593993, ILMN_2924030	1951	55	17854	1.49747	1	0.745996	98.3622
Annotation Cluster 63	Enrichment Score: 1.3037632937717574
Category	Term	Count	%	PValue	Genes	List Total	Pop Hits	Pop Total	Fold Enrichment	Bonferroni	Benjamini	FDR
GOTERM_BP_FAT	GO:0051247~positive regulation of protein metabolic process	21	1.01942	0.0110283	ILMN_1215252, ILMN_1227889, ILMN_1246724, ILMN_2466845, ILMN_2715215, ILMN_2655204, ILMN_2837476, ILMN_2678828, ILMN_2667100, ILMN_2805945, ILMN_1227863, ILMN_2788283, ILMN_2728802, ILMN_1257208, ILMN_2906471, ILMN_2686044, ILMN_2912872, ILMN_1217890, ILMN_2756460, ILMN_2987294, ILMN_2906473, ILMN_1245579, ILMN_1238928, ILMN_2594344	1454	109	13588	1.80046	1	0.278146	18.2374
GOTERM_BP_FAT	GO:0031399~regulation of protein modification process	26	1.26214	0.0461111	ILMN_1215252, ILMN_2792268, ILMN_2792267, ILMN_2709397, ILMN_2648973, ILMN_2728802, ILMN_1257208, ILMN_1217890, ILMN_1235481, ILMN_2756460, ILMN_2776025, ILMN_1227218, ILMN_1234521, ILMN_2941992, ILMN_1227889, ILMN_1246724, ILMN_2466845, ILMN_2933431, ILMN_2618714, ILMN_2837476, ILMN_1216072, ILMN_2667100, ILMN_1227863, ILMN_2906471, ILMN_1216721, ILMN_2479786, ILMN_2906473, ILMN_1245579, ILMN_12…	1454	165	13588	1.47259	1	0.588253	57.5627
GOTERM_BP_FAT	GO:0032270~positive regulation of cellular protein metabolic process	17	0.825243	0.0650298	ILMN_1215252, ILMN_1227889, ILMN_1246724, ILMN_2466845, ILMN_2715215, ILMN_2837476, ILMN_2678828, ILMN_2667100, ILMN_2805945, ILMN_1227863, ILMN_2788283, ILMN_2728802, ILMN_1257208, ILMN_2906471, ILMN_2686044, ILMN_1217890, ILMN_2756460, ILMN_2906473, ILMN_1245579, ILMN_1238928	1454	100	13588	1.58869	1	0.666437	70.5026
GOTERM_BP_FAT	GO:0032268~regulation of cellular protein metabolic process	39	1.8932	0.0732383	ILMN_1215252, ILMN_2722938, ILMN_2715215, ILMN_2911936, ILMN_2792268, ILMN_2792267, ILMN_2709397, ILMN_2648973, ILMN_2678828, ILMN_2805945, ILMN_2728802, ILMN_2788283, ILMN_1257208, ILMN_1217890, ILMN_1235481, ILMN_2756460, ILMN_2776025, ILMN_1227218, ILMN_1234997, ILMN_1234521, ILMN_2941992, ILMN_3162184, ILMN_1227889, ILMN_2466845, ILMN_1246724, ILMN_2933431, ILMN_2618714, ILMN_2593993, ILMN_28…	1454	280	13588	1.30166	1	0.689926	74.8667
GOTERM_BP_FAT	GO:0031401~positive regulation of protein modification process	13	0.631068	0.125032	ILMN_1215252, ILMN_1227889, ILMN_2466845, ILMN_1246724, ILMN_2837476, ILMN_1227863, ILMN_2667100, ILMN_2728802, ILMN_1257208, ILMN_2906471, ILMN_1217890, ILMN_2756460, ILMN_2906473, ILMN_1245579, ILMN_1238928	1454	78	13588	1.55754	1	0.823464	91.1535
Annotation Cluster 64	Enrichment Score: 1.3026475220594822
Category	Term	Count	%	PValue	Genes	List Total	Pop Hits	Pop Total	Fold Enrichment	Bonferroni	Benjamini	FDR
GOTERM_CC_FAT	GO:0031300~intrinsic to organelle membrane	20	0.970874	0.0198385	ILMN_2718090, ILMN_3131666, ILMN_2826816, ILMN_2731989, ILMN_2839134, ILMN_1255423, ILMN_3001452, ILMN_2609495, ILMN_2838645, ILMN_2597686, ILMN_2652187, ILMN_2740348, ILMN_2912872, ILMN_2895364, ILMN_1228796, ILMN_2599360, ILMN_2939295, ILMN_1244297, ILMN_3120797, ILMN_1213855, ILMN_3132204, ILMN_2437856, ILMN_2939294	1289	112	12504	1.73224	0.999973	0.163311	25.2135
GOTERM_CC_FAT	GO:0031227~intrinsic to endoplasmic reticulum membrane	11	0.533981	0.0372656	ILMN_2718090, ILMN_2597686, ILMN_2895364, ILMN_2731989, ILMN_1255423, ILMN_3001452, ILMN_3120797, ILMN_1244297, ILMN_2838645, ILMN_1213855, ILMN_2609495	1289	52	12504	2.05204	1	0.260732	42.3422
GOTERM_CC_FAT	GO:0031301~integral to organelle membrane	15	0.728155	0.070707	ILMN_2718090, ILMN_3131666, ILMN_2731989, ILMN_2839134, ILMN_1255423, ILMN_2838645, ILMN_2597686, ILMN_2652187, ILMN_2740348, ILMN_2912872, ILMN_1228796, ILMN_2939295, ILMN_2599360, ILMN_1244297, ILMN_3120797, ILMN_2437856, ILMN_2939294, ILMN_3132204	1289	89	12504	1.63492	1	0.364236	65.4666
GOTERM_CC_FAT	GO:0030176~integral to endoplasmic reticulum membrane	7	0.339806	0.117796	ILMN_2718090, ILMN_2597686, ILMN_2731989, ILMN_1255423, ILMN_3120797, ILMN_1244297, ILMN_2838645	1289	33	12504	2.05769	1	0.485541	83.7522
Annotation Cluster 65	Enrichment Score: 1.2846695998691153
Category	Term	Count	%	PValue	Genes	List Total	Pop Hits	Pop Total	Fold Enrichment	Bonferroni	Benjamini	FDR
GOTERM_BP_FAT	GO:0043087~regulation of GTPase activity	20	0.970874	0.00402058	ILMN_2962083, ILMN_1228165, ILMN_1222682, ILMN_2599532, ILMN_1218901, ILMN_1223713, ILMN_2620053, ILMN_1236232, ILMN_1217144, ILMN_3121578, ILMN_1251220, ILMN_1243107, ILMN_2754598, ILMN_2906471, ILMN_2648618, ILMN_2694153, ILMN_2756460, ILMN_2987294, ILMN_2906473, ILMN_1241481, ILMN_3135566, ILMN_2722583, ILMN_1238928	1454	93	13588	2.00973	0.999998	0.139042	7.05365
GOTERM_BP_FAT	GO:0032318~regulation of Ras GTPase activity	17	0.825243	0.00972848	ILMN_2962083, ILMN_1228165, ILMN_1222682, ILMN_1218901, ILMN_2620053, ILMN_1236232, ILMN_1217144, ILMN_3121578, ILMN_1251220, ILMN_1243107, ILMN_2754598, ILMN_2906471, ILMN_2648618, ILMN_2694153, ILMN_2756460, ILMN_2987294, ILMN_2906473, ILMN_1241481, ILMN_2722583, ILMN_1238928	1454	80	13588	1.98587	1	0.266454	16.2641
GOTERM_BP_FAT	GO:0051336~regulation of hydrolase activity	31	1.50485	0.0276834	ILMN_2962083, ILMN_1228165, ILMN_2739295, ILMN_2740852, ILMN_2620053, ILMN_3163031, ILMN_1236232, ILMN_1221981, ILMN_2754598, ILMN_2729153, ILMN_2756460, ILMN_2722583, ILMN_2466845, ILMN_1222682, ILMN_2599532, ILMN_2690620, ILMN_1218901, ILMN_1223713, ILMN_2837476, ILMN_1217144, ILMN_2791578, ILMN_3121578, ILMN_1251220, ILMN_1243107, ILMN_2906471, ILMN_2648618, ILMN_2694153, ILMN_2661971, ILMN_29…	1454	196	13588	1.47808	1	0.477069	39.9341
SP_PIR_KEYWORDS	GTPase activation	23	1.1165	0.0386632	ILMN_2920752, ILMN_1228165, ILMN_1222682, ILMN_3094506, ILMN_2599532, ILMN_1240592, ILMN_1218901, ILMN_1223713, ILMN_2894574, ILMN_1217144, ILMN_3121578, ILMN_1251220, ILMN_2998807, ILMN_1243107, ILMN_2754598, ILMN_2648618, ILMN_2694153, ILMN_3159720, ILMN_1241481, ILMN_3135566, ILMN_2722583, ILMN_2728038, ILMN_2756291	1951	136	17854	1.54763	1	0.245034	43.3147
GOTERM_MF_FAT	GO:0005096~GTPase activator activity	29	1.40777	0.0418219	ILMN_2962083, ILMN_1228165, ILMN_1240592, ILMN_2894574, ILMN_2620053, ILMN_1236232, ILMN_2754598, ILMN_2722583, ILMN_2756291, ILMN_2920752, ILMN_1222682, ILMN_3094506, ILMN_2599532, ILMN_1218901, ILMN_1223713, ILMN_1217144, ILMN_2999748, ILMN_3121578, ILMN_1251220, ILMN_2998807, ILMN_1243107, ILMN_2648618, ILMN_2599751, ILMN_2694153, ILMN_3159720, ILMN_1213296, ILMN_2987294, ILMN_1241481, ILMN_31…	1385	192	13288	1.44913	1	0.529322	49.4036
GOTERM_MF_FAT	GO:0005083~small GTPase regulator activity	32	1.5534	0.0581725	ILMN_2962083, ILMN_1219978, ILMN_1228165, ILMN_1240592, ILMN_3107607, ILMN_2620053, ILMN_1236232, ILMN_3151722, ILMN_3127335, ILMN_2754598, ILMN_2867696, ILMN_1213030, ILMN_2722583, ILMN_2756291, ILMN_1259949, ILMN_2635232, ILMN_2920752, ILMN_1222682, ILMN_3094506, ILMN_1228349, ILMN_2599532, ILMN_1218901, ILMN_1223713, ILMN_2705235, ILMN_1230893, ILMN_1217144, ILMN_3121578, ILMN_1251220, ILMN_12…	1385	223	13288	1.37675	1	0.58166	61.5482
GOTERM_BP_FAT	GO:0046578~regulation of Ras protein signal transduction	27	1.31068	0.0725795	ILMN_2962083, ILMN_1228165, ILMN_1240592, ILMN_2620053, ILMN_1236232, ILMN_2915059, ILMN_3151722, ILMN_2754598, ILMN_2756460, ILMN_2722583, ILMN_2756291, ILMN_1259949, ILMN_2920752, ILMN_1222682, ILMN_3094506, ILMN_1228349, ILMN_1218901, ILMN_2705235, ILMN_1217144, ILMN_1230893, ILMN_3121578, ILMN_1251220, ILMN_1239607, ILMN_1243107, ILMN_2906471, ILMN_2648618, ILMN_2694153, ILMN_2987294, ILMN_29…	1454	181	13588	1.39404	1	0.689992	74.5404
GOTERM_MF_FAT	GO:0008047~enzyme activator activity	33	1.60194	0.123415	ILMN_2962083, ILMN_1228165, ILMN_2690506, ILMN_1240592, ILMN_2620053, ILMN_2894574, ILMN_1236232, ILMN_2720180, ILMN_2754598, ILMN_2722583, ILMN_2756291, ILMN_2920752, ILMN_1222682, ILMN_3094506, ILMN_2599532, ILMN_1218901, ILMN_1223713, ILMN_1217144, ILMN_2999748, ILMN_3121578, ILMN_1251220, ILMN_2998807, ILMN_1243107, ILMN_1216042, ILMN_2648618, ILMN_2599751, ILMN_2694153, ILMN_1213296, ILMN_26…	1385	249	13288	1.27152	1	0.764549	87.7616
GOTERM_BP_FAT	GO:0051056~regulation of small GTPase mediated signal transduction	30	1.45631	0.184962	ILMN_2962083, ILMN_1228165, ILMN_1240592, ILMN_2620053, ILMN_2894574, ILMN_1236232, ILMN_2915059, ILMN_3151722, ILMN_3140516, ILMN_2754598, ILMN_2756460, ILMN_2722583, ILMN_2756291, ILMN_1259949, ILMN_2920752, ILMN_1222682, ILMN_3094506, ILMN_1228349, ILMN_1218901, ILMN_2705235, ILMN_1230893, ILMN_1217144, ILMN_3121578, ILMN_1251220, ILMN_1239607, ILMN_1243107, ILMN_2906471, ILMN_2648618, ILMN_26…	1454	228	13588	1.22964	1	0.896112	97.5606
GOTERM_MF_FAT	GO:0030695~GTPase regulator activity	44	2.13592	0.193827	ILMN_2962083, ILMN_2715215, ILMN_1219978, ILMN_1228165, ILMN_3107607, ILMN_1240592, ILMN_2620053, ILMN_2894574, ILMN_1236232, ILMN_3151722, ILMN_3127335, ILMN_3140516, ILMN_2754598, ILMN_2867696, ILMN_1213030, ILMN_2722583, ILMN_2870329, ILMN_2756291, ILMN_1259949, ILMN_2920752, ILMN_2635232, ILMN_2672997, ILMN_2762301, ILMN_1222682, ILMN_3094506, ILMN_1228349, ILMN_2599532, ILMN_1223713, ILMN_12…	1385	361	13288	1.16938	1	0.871471	96.7804
GOTERM_MF_FAT	GO:0060589~nucleoside-triphosphatase regulator activity	44	2.13592	0.225934	ILMN_2962083, ILMN_2715215, ILMN_1219978, ILMN_1228165, ILMN_3107607, ILMN_1240592, ILMN_2620053, ILMN_2894574, ILMN_1236232, ILMN_3151722, ILMN_3127335, ILMN_3140516, ILMN_2754598, ILMN_2867696, ILMN_1213030, ILMN_2722583, ILMN_2870329, ILMN_2756291, ILMN_1259949, ILMN_2920752, ILMN_2635232, ILMN_2672997, ILMN_2762301, ILMN_1222682, ILMN_3094506, ILMN_1228349, ILMN_2599532, ILMN_1223713, ILMN_12…	1385	367	13288	1.15026	1	0.903216	98.3161
Annotation Cluster 66	Enrichment Score: 1.275793385020163
Category	Term	Count	%	PValue	Genes	List Total	Pop Hits	Pop Total	Fold Enrichment	Bonferroni	Benjamini	FDR
GOTERM_BP_FAT	GO:0045834~positive regulation of lipid metabolic process	8	0.38835	0.0106116	ILMN_2792089, ILMN_2659616, ILMN_2739295, ILMN_1216042, ILMN_2992232, ILMN_1238736, ILMN_2946862, ILMN_1232458	1454	24	13588	3.11508	1	0.277749	17.6095
GOTERM_BP_FAT	GO:0043550~regulation of lipid kinase activity	4	0.194175	0.0452631	ILMN_2659616, ILMN_2679619, ILMN_1238736, ILMN_2946862	1454	8	13588	4.67263	1	0.585585	56.8725
GOTERM_BP_FAT	GO:0043551~regulation of phosphoinositide 3-kinase activity	3	0.145631	0.12813	ILMN_2659616, ILMN_1238736, ILMN_2946862	1454	6	13588	4.67263	1	0.8278	91.7054
GOTERM_BP_FAT	GO:0043552~positive regulation of phosphoinositide 3-kinase activity	3	0.145631	0.12813	ILMN_2659616, ILMN_1238736, ILMN_2946862	1454	6	13588	4.67263	1	0.8278	91.7054
Annotation Cluster 67	Enrichment Score: 1.2688318846894118
Category	Term	Count	%	PValue	Genes	List Total	Pop Hits	Pop Total	Fold Enrichment	Bonferroni	Benjamini	FDR
UP_SEQ_FEATURE	zinc finger region:TRAF-type 1	4	0.194175	0.0145861	ILMN_2960750, ILMN_2439638, ILMN_3046362, ILMN_2472451, ILMN_2472444, ILMN_3144289	1937	5	16021	6.61683	1	0.955862	23.9145
UP_SEQ_FEATURE	zinc finger region:TRAF-type 2	4	0.194175	0.0145861	ILMN_2960750, ILMN_2439638, ILMN_3046362, ILMN_2472451, ILMN_2472444, ILMN_3144289	1937	5	16021	6.61683	1	0.955862	23.9145
PIR_SUPERFAMILY	PIRSF015614:TRAF	4	0.194175	0.0150896	ILMN_2960750, ILMN_2439638, ILMN_3046362, ILMN_2472451, ILMN_2472444, ILMN_3144289	801	6	8136	6.77154	0.999999	0.999054	21.1435
INTERPRO	IPR012227:TNF receptor-associated factor TRAF	4	0.194175	0.018374	ILMN_2960750, ILMN_2439638, ILMN_3046362, ILMN_2472451, ILMN_2472444, ILMN_3144289	1876	6	17763	6.31237	1	0.715743	27.7637
SMART	SM00061:MATH	5	0.242718	0.112577	ILMN_2960750, ILMN_2439638, ILMN_3046362, ILMN_2472451, ILMN_2472444, ILMN_2706567, ILMN_3144289	960	18	9131	2.64207	1	0.813929	80.5019
INTERPRO	IPR002083:MATH	5	0.242718	0.114268	ILMN_2960750, ILMN_2439638, ILMN_3046362, ILMN_2472451, ILMN_2472444, ILMN_2706567, ILMN_3144289	1876	18	17763	2.63015	1	0.976272	88.0924
BIOCARTA	m_tall1Pathway:TACI and BCMA stimulation of B cell immune responses.	5	0.242718	0.122009	ILMN_2960750, ILMN_2439638, ILMN_3046362, ILMN_2507286, ILMN_3144289, ILMN_2592476	166	14	1171	2.51936	1	0.681445	80.7025
INTERPRO	IPR001293:Zinc finger, TRAF-type	4	0.194175	0.125401	ILMN_2960750, ILMN_2439638, ILMN_3046362, ILMN_2472451, ILMN_2472444, ILMN_3144289	1876	12	17763	3.15618	1	0.981242	90.4613
INTERPRO	IPR013322:TRAF-type	4	0.194175	0.125401	ILMN_2960750, ILMN_2439638, ILMN_3046362, ILMN_2472451, ILMN_2472444, ILMN_3144289	1876	12	17763	3.15618	1	0.981242	90.4613
UP_SEQ_FEATURE	domain:MATH	5	0.242718	0.140786	ILMN_2960750, ILMN_2439638, ILMN_3046362, ILMN_2472451, ILMN_2472444, ILMN_2706567, ILMN_3144289	1937	17	16021	2.43266	1	0.999893	94.0539
Annotation Cluster 68	Enrichment Score: 1.2669586281587197
Category	Term	Count	%	PValue	Genes	List Total	Pop Hits	Pop Total	Fold Enrichment	Bonferroni	Benjamini	FDR
GOTERM_CC_FAT	GO:0016323~basolateral plasma membrane	24	1.16505	0.0174337	ILMN_2727687, ILMN_1230007, ILMN_2828877, ILMN_2972646, ILMN_2972645, ILMN_3114585, ILMN_3123303, ILMN_1239662, ILMN_2842137, ILMN_2879745, ILMN_2716511, ILMN_2667889, ILMN_2822053, ILMN_2879746, ILMN_1237773, ILMN_2669189, ILMN_2727692, ILMN_2878726, ILMN_3146420, ILMN_2998807, ILMN_2736999, ILMN_2663230, ILMN_1212894, ILMN_1242472, ILMN_2615901, ILMN_2770471, ILMN_1252629, ILMN_2678576, ILMN_27…	1289	141	12504	1.65116	0.999902	0.147171	22.5086
GOTERM_CC_FAT	GO:0005925~focal adhesion	12	0.582524	0.0290834	ILMN_2879745, ILMN_1230007, ILMN_2879746, ILMN_1237773, ILMN_2669189, ILMN_2998807, ILMN_2736999, ILMN_3123303, ILMN_1242472, ILMN_2615901, ILMN_1252629, ILMN_2706495, ILMN_2842137, ILMN_2743133, ILMN_2728038	1289	57	12504	2.04222	1	0.218043	34.8149
GOTERM_CC_FAT	GO:0005924~cell-substrate adherens junction	12	0.582524	0.0452957	ILMN_2879745, ILMN_1230007, ILMN_2879746, ILMN_1237773, ILMN_2669189, ILMN_2998807, ILMN_2736999, ILMN_3123303, ILMN_1242472, ILMN_2615901, ILMN_1252629, ILMN_2706495, ILMN_2842137, ILMN_2743133, ILMN_2728038	1289	61	12504	1.9083	1	0.290189	48.936
GOTERM_CC_FAT	GO:0030055~cell-substrate junction	12	0.582524	0.0730558	ILMN_2879745, ILMN_1230007, ILMN_2879746, ILMN_1237773, ILMN_2669189, ILMN_2998807, ILMN_2736999, ILMN_3123303, ILMN_1242472, ILMN_2615901, ILMN_1252629, ILMN_2706495, ILMN_2842137, ILMN_2743133, ILMN_2728038	1289	66	12504	1.76374	1	0.370677	66.7107
GOTERM_CC_FAT	GO:0005912~adherens junction	17	0.825243	0.0760536	ILMN_2879745, ILMN_1230007, ILMN_2879746, ILMN_1237773, ILMN_2669189, ILMN_2645493, ILMN_2998807, ILMN_2736999, ILMN_2648709, ILMN_3123303, ILMN_2780205, ILMN_2665948, ILMN_1242472, ILMN_3085841, ILMN_2615901, ILMN_1252629, ILMN_2706495, ILMN_2842137, ILMN_2728038, ILMN_2743133	1289	106	12504	1.55575	1	0.372874	68.2381
GOTERM_CC_FAT	GO:0070161~anchoring junction	17	0.825243	0.196057	ILMN_2879745, ILMN_1230007, ILMN_2879746, ILMN_1237773, ILMN_2669189, ILMN_2645493, ILMN_2998807, ILMN_2736999, ILMN_2648709, ILMN_3123303, ILMN_2780205, ILMN_2665948, ILMN_1242472, ILMN_3085841, ILMN_2615901, ILMN_1252629, ILMN_2706495, ILMN_2842137, ILMN_2728038, ILMN_2743133	1289	123	12504	1.34073	1	0.627555	95.7748
Annotation Cluster 69	Enrichment Score: 1.2491709168443454
Category	Term	Count	%	PValue	Genes	List Total	Pop Hits	Pop Total	Fold Enrichment	Bonferroni	Benjamini	FDR
SMART	SM00591:RWD	5	0.242718	0.0398962	ILMN_2682811, ILMN_2922728, ILMN_2680852, ILMN_2617925, ILMN_2796557	960	13	9131	3.65825	0.999999	0.697076	42.725
INTERPRO	IPR006575:RWD	5	0.242718	0.040602	ILMN_2682811, ILMN_2922728, ILMN_2680852, ILMN_2617925, ILMN_2796557	1876	13	17763	3.64175	1	0.882244	51.6598
UP_SEQ_FEATURE	domain:RWD	4	0.194175	0.11041	ILMN_2682811, ILMN_2922728, ILMN_2680852, ILMN_2796557	1937	10	16021	3.30842	1	0.999564	88.6529
Annotation Cluster 70	Enrichment Score: 1.2314194329819899
Category	Term	Count	%	PValue	Genes	List Total	Pop Hits	Pop Total	Fold Enrichment	Bonferroni	Benjamini	FDR
GOTERM_BP_FAT	GO:0001525~angiogenesis	24	1.16505	0.0136331	ILMN_1224644, ILMN_1215252, ILMN_2945275, ILMN_2627041, ILMN_3121255, ILMN_3156343, ILMN_2742667, ILMN_2475864, ILMN_3155789, ILMN_2729153, ILMN_2957070, ILMN_1254157, ILMN_3132204, ILMN_2450384, ILMN_3052632, ILMN_2852034, ILMN_2609887, ILMN_1229971, ILMN_2780759, ILMN_2589651, ILMN_2615901, ILMN_3131909, ILMN_3097868, ILMN_2599360, ILMN_2728038, ILMN_1259365	1454	133	13588	1.68636	1	0.320165	22.0604
GOTERM_BP_FAT	GO:0001944~vasculature development	35	1.69903	0.0843066	ILMN_1215252, ILMN_1224644, ILMN_2936380, ILMN_2627041, ILMN_2945275, ILMN_1213055, ILMN_3121255, ILMN_3156343, ILMN_2742667, ILMN_2475864, ILMN_3155789, ILMN_2812614, ILMN_3140516, ILMN_2601071, ILMN_2729153, ILMN_1245609, ILMN_2957070, ILMN_2749937, ILMN_3132204, ILMN_1254157, ILMN_2768755, ILMN_2827036, ILMN_2450384, ILMN_3052632, ILMN_2649828, ILMN_2609887, ILMN_1229971, ILMN_2852034, ILMN_27…	1454	250	13588	1.30834	1	0.724296	79.7928
GOTERM_BP_FAT	GO:0001568~blood vessel development	34	1.65049	0.0930915	ILMN_1215252, ILMN_1224644, ILMN_2936380, ILMN_2627041, ILMN_2945275, ILMN_1213055, ILMN_3121255, ILMN_3156343, ILMN_2742667, ILMN_2475864, ILMN_3155789, ILMN_2812614, ILMN_3140516, ILMN_2601071, ILMN_2729153, ILMN_1245609, ILMN_2957070, ILMN_2749937, ILMN_3132204, ILMN_1254157, ILMN_2768755, ILMN_2827036, ILMN_2450384, ILMN_3052632, ILMN_2649828, ILMN_2609887, ILMN_1229971, ILMN_2852034, ILMN_27…	1454	244	13588	1.30221	1	0.752866	83.0374
GOTERM_BP_FAT	GO:0048514~blood vessel morphogenesis	28	1.35922	0.110906	ILMN_1224644, ILMN_1215252, ILMN_2936380, ILMN_2627041, ILMN_2945275, ILMN_3121255, ILMN_3156343, ILMN_2742667, ILMN_2475864, ILMN_3155789, ILMN_2729153, ILMN_1245609, ILMN_2957070, ILMN_3132204, ILMN_1254157, ILMN_2768755, ILMN_2450384, ILMN_3052632, ILMN_1229971, ILMN_2609887, ILMN_2852034, ILMN_2780759, ILMN_2986978, ILMN_2589651, ILMN_1216042, ILMN_2615901, ILMN_3131909, ILMN_3097868, ILMN_25…	1454	198	13588	1.32155	1	0.797463	88.168
Annotation Cluster 71	Enrichment Score: 1.2169283832405968
Category	Term	Count	%	PValue	Genes	List Total	Pop Hits	Pop Total	Fold Enrichment	Bonferroni	Benjamini	FDR
UP_SEQ_FEATURE	domain:ABC transporter 1	9	0.436893	0.0150514	ILMN_2789544, ILMN_1249522, ILMN_2685157, ILMN_2768926, ILMN_3104271, ILMN_1216987, ILMN_2718700, ILMN_1221703, ILMN_3150233, ILMN_2669034, ILMN_2699880	1937	28	16021	2.65855	1	0.953099	24.5801
UP_SEQ_FEATURE	domain:ABC transporter 2	9	0.436893	0.0150514	ILMN_2789544, ILMN_1249522, ILMN_2685157, ILMN_2768926, ILMN_3104271, ILMN_1216987, ILMN_2718700, ILMN_1221703, ILMN_3150233, ILMN_2669034, ILMN_2699880	1937	28	16021	2.65855	1	0.953099	24.5801
UP_SEQ_FEATURE	nucleotide phosphate-binding region:ATP 2	9	0.436893	0.0275671	ILMN_2789544, ILMN_1249522, ILMN_2685157, ILMN_2768926, ILMN_3104271, ILMN_1216987, ILMN_2718700, ILMN_1221703, ILMN_3150233, ILMN_2669034, ILMN_2699880	1937	31	16021	2.40127	1	0.986941	40.5464
UP_SEQ_FEATURE	nucleotide phosphate-binding region:ATP 1	9	0.436893	0.0275671	ILMN_2789544, ILMN_1249522, ILMN_2685157, ILMN_2768926, ILMN_3104271, ILMN_1216987, ILMN_2718700, ILMN_1221703, ILMN_3150233, ILMN_2669034, ILMN_2699880	1937	31	16021	2.40127	1	0.986941	40.5464
SMART	SM00382:AAA	23	1.1165	0.0301472	ILMN_2685157, ILMN_2637203, ILMN_2755140, ILMN_2598972, ILMN_1216987, ILMN_2699880, ILMN_2690410, ILMN_1249522, ILMN_2921749, ILMN_2691345, ILMN_3104271, ILMN_2691982, ILMN_2718700, ILMN_1221703, ILMN_2677379, ILMN_2768926, ILMN_2932787, ILMN_1240620, ILMN_3154849, ILMN_2789544, ILMN_2689274, ILMN_2936954, ILMN_2666487, ILMN_3150233, ILMN_2669034, ILMN_2666483	960	138	9131	1.58524	0.999979	0.624521	34.2306
INTERPRO	IPR003593:ATPase, AAA+ type, core	23	1.1165	0.0321881	ILMN_2685157, ILMN_2637203, ILMN_2755140, ILMN_2598972, ILMN_1216987, ILMN_2699880, ILMN_2690410, ILMN_1249522, ILMN_2921749, ILMN_2691345, ILMN_3104271, ILMN_2691982, ILMN_2718700, ILMN_1221703, ILMN_2677379, ILMN_2768926, ILMN_2932787, ILMN_1240620, ILMN_3154849, ILMN_2789544, ILMN_2689274, ILMN_2936954, ILMN_2666487, ILMN_3150233, ILMN_2669034, ILMN_2666483	1876	138	17763	1.57809	1	0.828858	43.6607
INTERPRO	IPR017871:ABC transporter, conserved site	11	0.533981	0.133205	ILMN_2610835, ILMN_2685157, ILMN_2732689, ILMN_2768926, ILMN_1216987, ILMN_2699880, ILMN_2789544, ILMN_1249522, ILMN_3104271, ILMN_2718700, ILMN_1221703, ILMN_3150233, ILMN_2776025, ILMN_2669034	1876	64	17763	1.62741	1	0.983241	91.8488
INTERPRO	IPR003439:ABC transporter-like	9	0.436893	0.19175	ILMN_2789544, ILMN_1249522, ILMN_2685157, ILMN_2768926, ILMN_3104271, ILMN_1216987, ILMN_2718700, ILMN_1221703, ILMN_3150233, ILMN_2669034, ILMN_2699880	1876	53	17763	1.60787	1	0.994241	97.6089
KEGG_PATHWAY	mmu02010:ABC transporters	7	0.339806	0.390267	ILMN_2685157, ILMN_3104271, ILMN_1216987, ILMN_2718700, ILMN_1221703, ILMN_3150233, ILMN_2699880	643	45	5738	1.38815	1	0.658339	99.7718
COG_ONTOLOGY	Defense mechanisms	4	0.194175	0.406647	ILMN_2768926, ILMN_3104271, ILMN_2718700, ILMN_2699880	247	19	2040	1.73876	1	0.916201	99.106
Annotation Cluster 72	Enrichment Score: 1.192932947237544
Category	Term	Count	%	PValue	Genes	List Total	Pop Hits	Pop Total	Fold Enrichment	Bonferroni	Benjamini	FDR
GOTERM_BP_FAT	GO:0048332~mesoderm morphogenesis	9	0.436893	0.0445817	ILMN_1215252, ILMN_2938893, ILMN_3109289, ILMN_1228414, ILMN_2609887, ILMN_2895364, ILMN_1235481, ILMN_2653312, ILMN_2833378, ILMN_2833376	1454	38	13588	2.21335	1	0.586418	56.3102
GOTERM_BP_FAT	GO:0007498~mesoderm development	12	0.582524	0.046134	ILMN_1215252, ILMN_3109289, ILMN_2609887, ILMN_2833378, ILMN_2731989, ILMN_2833376, ILMN_3121255, ILMN_2938893, ILMN_1228414, ILMN_1235481, ILMN_2895364, ILMN_2653312, ILMN_2654013	1454	59	13588	1.90073	1	0.586322	57.5812
GOTERM_BP_FAT	GO:0007369~gastrulation	14	0.679612	0.048823	ILMN_1215252, ILMN_2466845, ILMN_2609887, ILMN_2833378, ILMN_2731989, ILMN_2833376, ILMN_2893077, ILMN_2938893, ILMN_1228414, ILMN_1232592, ILMN_2895364, ILMN_1235481, ILMN_2653312, ILMN_2942097, ILMN_2993711	1454	74	13588	1.76802	1	0.603362	59.7007
GOTERM_BP_FAT	GO:0001707~mesoderm formation	8	0.38835	0.0834879	ILMN_1215252, ILMN_2938893, ILMN_1228414, ILMN_2609887, ILMN_2895364, ILMN_1235481, ILMN_2653312, ILMN_2833378, ILMN_2833376	1454	36	13588	2.07672	1	0.722282	79.4622
GOTERM_BP_FAT	GO:0001704~formation of primary germ layer	8	0.38835	0.129393	ILMN_1215252, ILMN_2938893, ILMN_1228414, ILMN_2609887, ILMN_2895364, ILMN_1235481, ILMN_2653312, ILMN_2833378, ILMN_2833376	1454	40	13588	1.86905	1	0.827399	91.9207
Annotation Cluster 73	Enrichment Score: 1.1896566864608742
Category	Term	Count	%	PValue	Genes	List Total	Pop Hits	Pop Total	Fold Enrichment	Bonferroni	Benjamini	FDR
GOTERM_BP_FAT	GO:0007059~chromosome segregation	14	0.679612	0.0165096	ILMN_2667889, ILMN_2854962, ILMN_2757006, ILMN_2648973, ILMN_1259798, ILMN_3024099, ILMN_3123970, ILMN_1220943, ILMN_2711410, ILMN_2432458, ILMN_2499058, ILMN_2655944, ILMN_1217753, ILMN_1250574	1454	64	13588	2.04427	1	0.356708	26.0856
GOTERM_BP_FAT	GO:0000070~mitotic sister chromatid segregation	5	0.242718	0.118429	ILMN_2667889, ILMN_2757006, ILMN_1259798, ILMN_2655944, ILMN_3024099	1454	18	13588	2.5959	1	0.811783	89.8597
GOTERM_BP_FAT	GO:0000819~sister chromatid segregation	5	0.242718	0.137986	ILMN_2667889, ILMN_2757006, ILMN_1259798, ILMN_2655944, ILMN_3024099	1454	19	13588	2.45928	1	0.842186	93.2524
Annotation Cluster 74	Enrichment Score: 1.1803885073792981
Category	Term	Count	%	PValue	Genes	List Total	Pop Hits	Pop Total	Fold Enrichment	Bonferroni	Benjamini	FDR
KEGG_PATHWAY	mmu04370:VEGF signaling pathway	19	0.92233	0.00142824	ILMN_2732317, ILMN_2649828, ILMN_2724570, ILMN_2904321, ILMN_2971286, ILMN_1213055, ILMN_2747229, ILMN_1223624, ILMN_3121255, ILMN_2946862, ILMN_1226157, ILMN_2659616, ILMN_1250000, ILMN_3123303, ILMN_2615901, ILMN_2601071, ILMN_1217890, ILMN_2729153, ILMN_2705003, ILMN_2953411, ILMN_2735633	643	76	5738	2.23095	0.224625	0.0228627	1.74186
KEGG_PATHWAY	mmu04722:Neurotrophin signaling pathway	25	1.21359	0.00876577	ILMN_2937738, ILMN_2937735, ILMN_2945238, ILMN_2724570, ILMN_1213055, ILMN_1245874, ILMN_1215681, ILMN_2639375, ILMN_2851288, ILMN_2592476, ILMN_3028981, ILMN_3140516, ILMN_1226157, ILMN_2591066, ILMN_2659616, ILMN_2660233, ILMN_2601071, ILMN_2957070, ILMN_2743723, ILMN_2993711, ILMN_2732317, ILMN_2960750, ILMN_2466845, ILMN_2649828, ILMN_2904321, ILMN_2747229, ILMN_1223624, ILMN_2589556, ILMN_29…	643	130	5738	1.71611	0.791368	0.0719112	10.2593
KEGG_PATHWAY	mmu04662:B cell receptor signaling pathway	15	0.728155	0.0584371	ILMN_2732317, ILMN_2649828, ILMN_2904321, ILMN_2971286, ILMN_1213055, ILMN_2747229, ILMN_2589556, ILMN_1223624, ILMN_2592476, ILMN_1226157, ILMN_2659616, ILMN_1250000, ILMN_2601071, ILMN_2630423, ILMN_2705003, ILMN_2953411, ILMN_2735633	643	80	5738	1.67321	0.999978	0.23004	52.303
KEGG_PATHWAY	mmu04660:T cell receptor signaling pathway	20	0.970874	0.0641697	ILMN_2732317, ILMN_2649828, ILMN_2724570, ILMN_2904321, ILMN_2971286, ILMN_1213055, ILMN_2747229, ILMN_1223624, ILMN_2589556, ILMN_2946862, ILMN_2592476, ILMN_3028981, ILMN_1226157, ILMN_2591066, ILMN_1250000, ILMN_2640570, ILMN_2601071, ILMN_2630423, ILMN_2705003, ILMN_2953411, ILMN_2738699, ILMN_2735633	643	118	5738	1.51251	0.999993	0.245028	55.7531
KEGG_PATHWAY	mmu04720:Long-term potentiation	12	0.582524	0.153933	ILMN_1217408, ILMN_2649828, ILMN_2971286, ILMN_2833378, ILMN_1213055, ILMN_2747229, ILMN_1223624, ILMN_2833376, ILMN_1215681, ILMN_2637953, ILMN_1250000, ILMN_1217890, ILMN_2601071, ILMN_2705003, ILMN_2953411	643	70	5738	1.52979	1	0.406667	87.1921
KEGG_PATHWAY	mmu04664:Fc epsilon RI signaling pathway	12	0.582524	0.307814	ILMN_2920549, ILMN_2732317, ILMN_2649828, ILMN_2904321, ILMN_2724570, ILMN_1213055, ILMN_1223624, ILMN_2747229, ILMN_3028981, ILMN_1226157, ILMN_2591066, ILMN_2659616, ILMN_1217890, ILMN_2601071	643	82	5738	1.30592	1	0.602413	98.9145
KEGG_PATHWAY	mmu04650:Natural killer cell mediated cytotoxicity	16	0.776699	0.389582	ILMN_2732317, ILMN_1230007, ILMN_2845312, ILMN_2649828, ILMN_2971286, ILMN_1213055, ILMN_1245874, ILMN_2747229, ILMN_1223624, ILMN_1226157, ILMN_2659616, ILMN_1250000, ILMN_2601071, ILMN_1217890, ILMN_2705003, ILMN_2953411, ILMN_2957070, ILMN_2735633, ILMN_2743723	643	122	5738	1.17033	1	0.666558	99.7686
KEGG_PATHWAY	mmu04666:Fc gamma R-mediated phagocytosis	13	0.631068	0.41597	ILMN_2732317, ILMN_2609412, ILMN_1231996, ILMN_2649828, ILMN_2904321, ILMN_1213055, ILMN_2747229, ILMN_3121578, ILMN_2946862, ILMN_1226157, ILMN_2659616, ILMN_3111421, ILMN_2601071, ILMN_1217890, ILMN_2694153	643	98	5738	1.18377	1	0.680062	99.8656
Annotation Cluster 75	Enrichment Score: 1.1730899761786038
Category	Term	Count	%	PValue	Genes	List Total	Pop Hits	Pop Total	Fold Enrichment	Bonferroni	Benjamini	FDR
GOTERM_CC_FAT	GO:0042579~microbody	18	0.873786	0.03657	ILMN_3114114, ILMN_2647170, ILMN_3136205, ILMN_1226978, ILMN_1236459, ILMN_2808191, ILMN_2647172, ILMN_1232404, ILMN_2605941, ILMN_1255146, ILMN_3003242, ILMN_2760514, ILMN_3039637, ILMN_2746906, ILMN_2663291, ILMN_2892222, ILMN_2949844, ILMN_2519536, ILMN_2944765, ILMN_1242903, ILMN_1227596, ILMN_2795698, ILMN_2626383, ILMN_2689581, ILMN_2633942, ILMN_2939295, ILMN_2939294	1289	104	12504	1.67894	1	0.263327	41.7353
GOTERM_CC_FAT	GO:0005777~peroxisome	18	0.873786	0.03657	ILMN_3114114, ILMN_2647170, ILMN_3136205, ILMN_1226978, ILMN_1236459, ILMN_2808191, ILMN_2647172, ILMN_1232404, ILMN_2605941, ILMN_1255146, ILMN_3003242, ILMN_2760514, ILMN_3039637, ILMN_2746906, ILMN_2663291, ILMN_2892222, ILMN_2949844, ILMN_2519536, ILMN_2944765, ILMN_1242903, ILMN_1227596, ILMN_2795698, ILMN_2626383, ILMN_2689581, ILMN_2633942, ILMN_2939295, ILMN_2939294	1289	104	12504	1.67894	1	0.263327	41.7353
SP_PIR_KEYWORDS	peroxisome	16	0.776699	0.0978982	ILMN_3114114, ILMN_3039637, ILMN_1236459, ILMN_1226978, ILMN_3136205, ILMN_2647170, ILMN_2746906, ILMN_2808191, ILMN_2663291, ILMN_2647172, ILMN_2519536, ILMN_2949844, ILMN_1232404, ILMN_2944765, ILMN_2605941, ILMN_1227596, ILMN_1255146, ILMN_2795698, ILMN_2689581, ILMN_2633942, ILMN_2760514, ILMN_2939295, ILMN_2939294	1951	96	17854	1.5252	1	0.465788	77.3096
UP_SEQ_FEATURE	short sequence motif:Microbody targeting signal	9	0.436893	0.155101	ILMN_2746906, ILMN_1236459, ILMN_2795698, ILMN_2808191, ILMN_2663291, ILMN_2949844, ILMN_2519536, ILMN_2689581, ILMN_2633942, ILMN_2605941, ILMN_1227596	1937	44	16021	1.6918	1	0.99994	95.6499
Annotation Cluster 76	Enrichment Score: 1.1596610298885293
Category	Term	Count	%	PValue	Genes	List Total	Pop Hits	Pop Total	Fold Enrichment	Bonferroni	Benjamini	FDR
GOTERM_BP_FAT	GO:0010941~regulation of cell death	80	3.8835	0.00679103	ILMN_2516266, ILMN_2933993, ILMN_2645074, ILMN_2705324, ILMN_2669333, ILMN_2720334, ILMN_2740852, ILMN_2718815, ILMN_2472444, ILMN_2671708, ILMN_3121255, ILMN_2942492, ILMN_2851288, ILMN_2893077, ILMN_1254154, ILMN_1257208, ILMN_2594718, ILMN_1225565, ILMN_1217890, ILMN_2729718, ILMN_2705227, ILMN_2648548, ILMN_2901402, ILMN_2742675, ILMN_2466845, ILMN_2852034, ILMN_2760593, ILMN_1259148, ILMN_26…	1454	563	13588	1.32792	1	0.208927	11.6376
GOTERM_BP_FAT	GO:0042981~regulation of apoptosis	78	3.78641	0.00892422	ILMN_2516266, ILMN_2933993, ILMN_2645074, ILMN_2705324, ILMN_2669333, ILMN_2720334, ILMN_2740852, ILMN_2718815, ILMN_2472444, ILMN_2671708, ILMN_3121255, ILMN_2942492, ILMN_2851288, ILMN_2893077, ILMN_1254154, ILMN_1257208, ILMN_2594718, ILMN_1225565, ILMN_1217890, ILMN_2729718, ILMN_2705227, ILMN_2648548, ILMN_2901402, ILMN_2742675, ILMN_2466845, ILMN_2852034, ILMN_2760593, ILMN_1259148, ILMN_26…	1454	553	13588	1.31814	1	0.251598	15.0206
GOTERM_BP_FAT	GO:0043067~regulation of programmed cell death	78	3.78641	0.0120668	ILMN_2516266, ILMN_2933993, ILMN_2645074, ILMN_2705324, ILMN_2669333, ILMN_2720334, ILMN_2740852, ILMN_2718815, ILMN_2472444, ILMN_2671708, ILMN_3121255, ILMN_2942492, ILMN_2851288, ILMN_2893077, ILMN_1254154, ILMN_1257208, ILMN_2594718, ILMN_1225565, ILMN_1217890, ILMN_2729718, ILMN_2705227, ILMN_2648548, ILMN_2901402, ILMN_2742675, ILMN_2466845, ILMN_2852034, ILMN_2760593, ILMN_1259148, ILMN_26…	1454	560	13588	1.30166	1	0.295622	19.7823
GOTERM_BP_FAT	GO:0010942~positive regulation of cell death	39	1.8932	0.0182915	ILMN_1215252, ILMN_2933993, ILMN_2516266, ILMN_2645074, ILMN_2886828, ILMN_2720334, ILMN_2669333, ILMN_2705324, ILMN_2655204, ILMN_2718815, ILMN_2737982, ILMN_1221981, ILMN_2942492, ILMN_3155915, ILMN_2851288, ILMN_2958410, ILMN_1254154, ILMN_2591066, ILMN_1257208, ILMN_1217890, ILMN_2705227, ILMN_2648548, ILMN_2901402, ILMN_2941992, ILMN_2749717, ILMN_2960750, ILMN_2466845, ILMN_2760593, ILMN_12…	1454	252	13588	1.44629	1	0.379651	28.4797
GOTERM_BP_FAT	GO:0043065~positive regulation of apoptosis	37	1.79612	0.0353392	ILMN_2933993, ILMN_2516266, ILMN_2645074, ILMN_2886828, ILMN_2720334, ILMN_2669333, ILMN_2705324, ILMN_2655204, ILMN_2718815, ILMN_2737982, ILMN_1221981, ILMN_2942492, ILMN_3155915, ILMN_2851288, ILMN_2958410, ILMN_1254154, ILMN_2591066, ILMN_1257208, ILMN_1217890, ILMN_2705227, ILMN_2648548, ILMN_2901402, ILMN_2941992, ILMN_2749717, ILMN_2960750, ILMN_2466845, ILMN_2760593, ILMN_1259148, ILMN_26…	1454	248	13588	1.39425	1	0.525568	47.9651
GOTERM_BP_FAT	GO:0043068~positive regulation of programmed cell death	37	1.79612	0.0391748	ILMN_2933993, ILMN_2516266, ILMN_2645074, ILMN_2886828, ILMN_2720334, ILMN_2669333, ILMN_2705324, ILMN_2655204, ILMN_2718815, ILMN_2737982, ILMN_1221981, ILMN_2942492, ILMN_3155915, ILMN_2851288, ILMN_2958410, ILMN_1254154, ILMN_2591066, ILMN_1257208, ILMN_1217890, ILMN_2705227, ILMN_2648548, ILMN_2901402, ILMN_2941992, ILMN_2749717, ILMN_2960750, ILMN_2466845, ILMN_2760593, ILMN_1259148, ILMN_26…	1454	250	13588	1.3831	1	0.551785	51.5962
GOTERM_BP_FAT	GO:0006917~induction of apoptosis	21	1.01942	0.329873	ILMN_2749717, ILMN_2960750, ILMN_2466845, ILMN_2645074, ILMN_2720334, ILMN_2669333, ILMN_2705324, ILMN_1259148, ILMN_2690620, ILMN_2737982, ILMN_1221981, ILMN_3155915, ILMN_2851288, ILMN_1254154, ILMN_2591066, ILMN_2977558, ILMN_1216042, ILMN_1243885, ILMN_1218154, ILMN_1217890, ILMN_2705227, ILMN_2648548, ILMN_2670375	1454	167	13588	1.17515	1	0.968578	99.9302
GOTERM_BP_FAT	GO:0012502~induction of programmed cell death	21	1.01942	0.329873	ILMN_2749717, ILMN_2960750, ILMN_2466845, ILMN_2645074, ILMN_2720334, ILMN_2669333, ILMN_2705324, ILMN_1259148, ILMN_2690620, ILMN_2737982, ILMN_1221981, ILMN_3155915, ILMN_2851288, ILMN_1254154, ILMN_2591066, ILMN_2977558, ILMN_1216042, ILMN_1243885, ILMN_1218154, ILMN_1217890, ILMN_2705227, ILMN_2648548, ILMN_2670375	1454	167	13588	1.17515	1	0.968578	99.9302
GOTERM_BP_FAT	GO:0043066~negative regulation of apoptosis	28	1.35922	0.411091	ILMN_2705324, ILMN_2740852, ILMN_2627041, ILMN_2655204, ILMN_2671708, ILMN_2737982, ILMN_3121255, ILMN_3155915, ILMN_2712018, ILMN_2893077, ILMN_2660233, ILMN_1225565, ILMN_2749717, ILMN_2742675, ILMN_2941992, ILMN_1246724, ILMN_2466845, ILMN_1244908, ILMN_2864798, ILMN_2507286, ILMN_1223624, ILMN_2937596, ILMN_2986978, ILMN_2602588, ILMN_2645439, ILMN_2780205, ILMN_2703082, ILMN_1218176, ILMN_29…	1454	239	13588	1.09484	1	0.985093	99.9933
GOTERM_BP_FAT	GO:0043069~negative regulation of programmed cell death	28	1.35922	0.455555	ILMN_2705324, ILMN_2740852, ILMN_2627041, ILMN_2655204, ILMN_2671708, ILMN_2737982, ILMN_3121255, ILMN_3155915, ILMN_2712018, ILMN_2893077, ILMN_2660233, ILMN_1225565, ILMN_2749717, ILMN_2742675, ILMN_2941992, ILMN_1246724, ILMN_2466845, ILMN_1244908, ILMN_2864798, ILMN_2507286, ILMN_1223624, ILMN_2937596, ILMN_2986978, ILMN_2602588, ILMN_2645439, ILMN_2780205, ILMN_2703082, ILMN_1218176, ILMN_29…	1454	244	13588	1.07241	1	0.990196	99.9984
GOTERM_BP_FAT	GO:0060548~negative regulation of cell death	28	1.35922	0.464456	ILMN_2705324, ILMN_2740852, ILMN_2627041, ILMN_2655204, ILMN_2671708, ILMN_2737982, ILMN_3121255, ILMN_3155915, ILMN_2712018, ILMN_2893077, ILMN_2660233, ILMN_1225565, ILMN_2749717, ILMN_2742675, ILMN_2941992, ILMN_1246724, ILMN_2466845, ILMN_1244908, ILMN_2864798, ILMN_2507286, ILMN_1223624, ILMN_2937596, ILMN_2986978, ILMN_2602588, ILMN_2645439, ILMN_2780205, ILMN_2703082, ILMN_1218176, ILMN_29…	1454	245	13588	1.06803	1	0.99096	99.9988
Annotation Cluster 77	Enrichment Score: 1.1585932155160625
Category	Term	Count	%	PValue	Genes	List Total	Pop Hits	Pop Total	Fold Enrichment	Bonferroni	Benjamini	FDR
GOTERM_BP_FAT	GO:0006370~mRNA capping	3	0.145631	0.0591923	ILMN_3162184, ILMN_2759335, ILMN_2773302	1454	4	13588	7.00894	1	0.642074	66.9735
SP_PIR_KEYWORDS	mrna capping	3	0.145631	0.0615575	ILMN_3162184, ILMN_2759335, ILMN_2773302	1951	4	17854	6.8634	1	0.348464	59.9345
GOTERM_BP_FAT	GO:0009452~RNA capping	3	0.145631	0.0917644	ILMN_3162184, ILMN_2759335, ILMN_2773302	1454	5	13588	5.60715	1	0.749182	82.581
Annotation Cluster 78	Enrichment Score: 1.1477938811669681
Category	Term	Count	%	PValue	Genes	List Total	Pop Hits	Pop Total	Fold Enrichment	Bonferroni	Benjamini	FDR
GOTERM_BP_FAT	GO:0006511~ubiquitin-dependent protein catabolic process	25	1.21359	0.0143696	ILMN_2471268, ILMN_1225124, ILMN_1216295, ILMN_2495939, ILMN_2513849, ILMN_2952841, ILMN_2990220, ILMN_3161250, ILMN_1224117, ILMN_2796353, ILMN_2662743, ILMN_1236369, ILMN_1228352, ILMN_2956895, ILMN_2637052, ILMN_1244297, ILMN_2681814, ILMN_2418324, ILMN_1230583, ILMN_3121851, ILMN_2491301, ILMN_1253666, ILMN_1227863, ILMN_2995698, ILMN_3149680, ILMN_2935999, ILMN_1216416, ILMN_2738699	1454	141	13588	1.65696	1	0.329646	23.1103
GOTERM_MF_FAT	GO:0019783~small conjugating protein-specific protease activity	7	0.339806	0.0269636	ILMN_2495939, ILMN_1236369, ILMN_2990220, ILMN_1250929, ILMN_2491301, ILMN_1225635, ILMN_2681814	1385	23	13288	2.91998	1	0.425887	35.3316
GOTERM_BP_FAT	GO:0070646~protein modification by small protein removal	7	0.339806	0.0442155	ILMN_2495939, ILMN_3122383, ILMN_1236369, ILMN_2990220, ILMN_1250929, ILMN_2491301, ILMN_2681814	1454	25	13588	2.61667	1	0.58553	56.0052
GOTERM_MF_FAT	GO:0004843~ubiquitin-specific protease activity	6	0.291262	0.049995	ILMN_2495939, ILMN_1236369, ILMN_2990220, ILMN_2491301, ILMN_1225635, ILMN_2681814	1385	20	13288	2.87827	1	0.561182	55.8642
GOTERM_MF_FAT	GO:0016790~thiolester hydrolase activity	18	0.873786	0.05436	ILMN_2471268, ILMN_2418324, ILMN_2495939, ILMN_2952841, ILMN_2917223, ILMN_2990220, ILMN_2740268, ILMN_3161250, ILMN_2491301, ILMN_2807084, ILMN_2731550, ILMN_1253666, ILMN_2717569, ILMN_2813284, ILMN_3122383, ILMN_1236369, ILMN_1218176, ILMN_1228352, ILMN_2681814	1385	108	13288	1.59904	1	0.576483	58.9895
GOTERM_MF_FAT	GO:0004221~ubiquitin thiolesterase activity	13	0.631068	0.0618207	ILMN_2471268, ILMN_2418324, ILMN_2495939, ILMN_2952841, ILMN_2990220, ILMN_3161250, ILMN_2491301, ILMN_1253666, ILMN_2813284, ILMN_3122383, ILMN_1236369, ILMN_1218176, ILMN_1228352, ILMN_2681814	1385	71	13288	1.75669	1	0.599692	63.8559
GOTERM_BP_FAT	GO:0016579~protein deubiquitination	6	0.291262	0.0916537	ILMN_2495939, ILMN_3122383, ILMN_1236369, ILMN_2990220, ILMN_2491301, ILMN_2681814	1454	23	13588	2.43789	1	0.750287	82.5424
INTERPRO	IPR018200:Peptidase C19, ubiquitin carboxyl-terminal hydrolase 2, conserved site	10	0.485437	0.10149	ILMN_2471268, ILMN_2418324, ILMN_2495939, ILMN_2952841, ILMN_1236369, ILMN_2990220, ILMN_1228352, ILMN_3161250, ILMN_2491301, ILMN_1253666, ILMN_2681814	1876	53	17763	1.78652	1	0.973468	84.6919
SP_PIR_KEYWORDS	thiol protease	19	0.92233	0.108126	ILMN_2495939, ILMN_2952841, ILMN_2990220, ILMN_2740268, ILMN_3161250, ILMN_2491301, ILMN_2646878, ILMN_1253666, ILMN_2706451, ILMN_2712480, ILMN_2717569, ILMN_2813284, ILMN_1236369, ILMN_1250929, ILMN_2648548, ILMN_3097868, ILMN_3120797, ILMN_1225635, ILMN_2681814	1951	121	17854	1.43697	1	0.493266	80.7446
GOTERM_MF_FAT	GO:0008234~cysteine-type peptidase activity	21	1.01942	0.12299	ILMN_2495939, ILMN_2952841, ILMN_2990220, ILMN_2740268, ILMN_3161250, ILMN_2491301, ILMN_2646878, ILMN_1253666, ILMN_2706451, ILMN_2712480, ILMN_2717569, ILMN_2813284, ILMN_2976129, ILMN_1236369, ILMN_2772248, ILMN_1250929, ILMN_2648548, ILMN_3097868, ILMN_1225635, ILMN_3120797, ILMN_2681814	1385	146	13288	1.37999	1	0.766782	87.6666
INTERPRO	IPR001394:Peptidase C19, ubiquitin carboxyl-terminal hydrolase 2	10	0.485437	0.142379	ILMN_2471268, ILMN_2418324, ILMN_2495939, ILMN_2952841, ILMN_1236369, ILMN_2990220, ILMN_1228352, ILMN_3161250, ILMN_2491301, ILMN_1253666, ILMN_2681814	1876	57	17763	1.66115	1	0.985591	93.2363
GOTERM_MF_FAT	GO:0004197~cysteine-type endopeptidase activity	9	0.436893	0.33229	ILMN_2712480, ILMN_1236369, ILMN_2976129, ILMN_2772248, ILMN_2491301, ILMN_2648548, ILMN_3097868, ILMN_2646878, ILMN_3120797	1385	63	13288	1.3706	1	0.956134	99.8405
Annotation Cluster 79	Enrichment Score: 1.1475955756958083
Category	Term	Count	%	PValue	Genes	List Total	Pop Hits	Pop Total	Fold Enrichment	Bonferroni	Benjamini	FDR
GOTERM_BP_FAT	GO:0035295~tube development	38	1.84466	0.0520969	ILMN_1215252, ILMN_2886828, ILMN_2945275, ILMN_2472444, ILMN_3121255, ILMN_3114585, ILMN_2615448, ILMN_2788283, ILMN_2829646, ILMN_3123303, ILMN_2652187, ILMN_1228414, ILMN_3085841, ILMN_1225565, ILMN_2653312, ILMN_2729153, ILMN_2953411, ILMN_2842137, ILMN_3100042, ILMN_3005669, ILMN_2941992, ILMN_2960750, ILMN_2511913, ILMN_3052632, ILMN_2852034, ILMN_2609887, ILMN_1247147, ILMN_2472451, ILMN_29…	1454	264	13588	1.34515	1	0.615444	62.1462
GOTERM_BP_FAT	GO:0030323~respiratory tube development	19	0.92233	0.0546694	ILMN_2941992, ILMN_1215252, ILMN_2511913, ILMN_3052632, ILMN_2609887, ILMN_1247147, ILMN_2472451, ILMN_2930707, ILMN_2472444, ILMN_3121255, ILMN_2615448, ILMN_2652187, ILMN_1228414, ILMN_1252078, ILMN_2653312, ILMN_2729153, ILMN_1245731, ILMN_2953411, ILMN_2666018, ILMN_3005669	1454	113	13588	1.57133	1	0.621668	63.9686
GOTERM_BP_FAT	GO:0030324~lung development	18	0.873786	0.0814345	ILMN_2941992, ILMN_1215252, ILMN_2511913, ILMN_3052632, ILMN_2609887, ILMN_1247147, ILMN_2930707, ILMN_3121255, ILMN_2615448, ILMN_2652187, ILMN_1228414, ILMN_1252078, ILMN_2653312, ILMN_2729153, ILMN_1245731, ILMN_2953411, ILMN_2666018, ILMN_3005669	1454	111	13588	1.51545	1	0.719555	78.6105
GOTERM_BP_FAT	GO:0060541~respiratory system development	19	0.92233	0.110727	ILMN_2941992, ILMN_1215252, ILMN_2511913, ILMN_3052632, ILMN_2609887, ILMN_1247147, ILMN_2930707, ILMN_3121255, ILMN_2615448, ILMN_2652187, ILMN_1228414, ILMN_1252078, ILMN_2663367, ILMN_2653312, ILMN_2729153, ILMN_1245731, ILMN_2953411, ILMN_2666018, ILMN_3005669	1454	124	13588	1.43193	1	0.79827	88.1247
Annotation Cluster 80	Enrichment Score: 1.1363566199091557
Category	Term	Count	%	PValue	Genes	List Total	Pop Hits	Pop Total	Fold Enrichment	Bonferroni	Benjamini	FDR
GOTERM_MF_FAT	GO:0004707~MAP kinase activity	5	0.242718	0.0500674	ILMN_2591066, ILMN_2681776, ILMN_2649828, ILMN_2724570, ILMN_2601071, ILMN_1213055, ILMN_2672582	1385	14	13288	3.42651	1	0.55637	55.9179
UP_SEQ_FEATURE	short sequence motif:TXY	5	0.242718	0.0620977	ILMN_2591066, ILMN_2681776, ILMN_2649828, ILMN_2724570, ILMN_2601071, ILMN_1213055, ILMN_2672582	1937	13	16021	3.18117	1	0.99756	69.6537
INTERPRO	IPR003527:MAP kinase, conserved site	4	0.194175	0.125401	ILMN_2591066, ILMN_2649828, ILMN_2724570, ILMN_2601071, ILMN_1213055, ILMN_2672582	1876	12	17763	3.15618	1	0.981242	90.4613
Annotation Cluster 81	Enrichment Score: 1.1358438990542383
Category	Term	Count	%	PValue	Genes	List Total	Pop Hits	Pop Total	Fold Enrichment	Bonferroni	Benjamini	FDR
UP_SEQ_FEATURE	short sequence motif:"HIGH" region	7	0.339806	0.0117202	ILMN_2810045, ILMN_2828687, ILMN_2907642, ILMN_2928160, ILMN_2857581, ILMN_2439341, ILMN_2591217, ILMN_3156343, ILMN_3146224, ILMN_1254157	1937	17	16021	3.40572	1	0.928838	19.6915
UP_SEQ_FEATURE	short sequence motif:"KMSKS" region	5	0.242718	0.0977254	ILMN_2810045, ILMN_2828687, ILMN_2928160, ILMN_2439341, ILMN_3156343, ILMN_3146224, ILMN_1254157	1937	15	16021	2.75701	1	0.999118	85.2341
KEGG_PATHWAY	mmu00290:Valine, leucine and isoleucine biosynthesis	4	0.194175	0.116322	ILMN_2810045, ILMN_2679851, ILMN_2928160, ILMN_2439341, ILMN_3146224	643	11	5738	3.24502	1	0.345121	78.1368
INTERPRO	IPR002300:Aminoacyl-tRNA synthetase, class Ia	3	0.145631	0.12534	ILMN_2810045, ILMN_2928160, ILMN_2439341, ILMN_3146224	1876	6	17763	4.73428	1	0.982125	90.4496
INTERPRO	IPR013155:Valyl/Leucyl/Isoleucyl-tRNA synthetase, class I, anticodon-binding	3	0.145631	0.12534	ILMN_2810045, ILMN_2928160, ILMN_2439341, ILMN_3146224	1876	6	17763	4.73428	1	0.982125	90.4496
Annotation Cluster 82	Enrichment Score: 1.1051687278140443
Category	Term	Count	%	PValue	Genes	List Total	Pop Hits	Pop Total	Fold Enrichment	Bonferroni	Benjamini	FDR
GOTERM_MF_FAT	GO:0004721~phosphoprotein phosphatase activity	29	1.40777	0.00193023	ILMN_2706730, ILMN_2611331, ILMN_2818964, ILMN_2626143, ILMN_1219080, ILMN_1245874, ILMN_3130055, ILMN_2727893, ILMN_2863264, ILMN_2643832, ILMN_1221199, ILMN_1257193, ILMN_1214179, ILMN_1242053, ILMN_1244296, ILMN_2711705, ILMN_2714397, ILMN_2752074, ILMN_2773302, ILMN_2678724, ILMN_2778409, ILMN_2743723, ILMN_2591381, ILMN_1243291, ILMN_2632489, ILMN_2971286, ILMN_2647282, ILMN_3151840, ILMN_27…	1385	152	13288	1.83048	0.874937	0.0715583	3.03417
SP_PIR_KEYWORDS	protein phosphatase	25	1.21359	0.00240676	ILMN_2706730, ILMN_2611331, ILMN_2818964, ILMN_2626143, ILMN_1219080, ILMN_1245874, ILMN_3130055, ILMN_2727893, ILMN_2863264, ILMN_2643832, ILMN_1257193, ILMN_1221199, ILMN_1214179, ILMN_1242053, ILMN_1244296, ILMN_2752074, ILMN_2714397, ILMN_2678724, ILMN_2778409, ILMN_2743723, ILMN_2591381, ILMN_1243291, ILMN_2632489, ILMN_2971286, ILMN_2647282, ILMN_3151840, ILMN_1213307, ILMN_2767996, ILMN_12…	1951	120	17854	1.9065	0.699535	0.0242406	3.40956
GOTERM_MF_FAT	GO:0016791~phosphatase activity	40	1.94175	0.00280724	ILMN_2611331, ILMN_2856157, ILMN_2719620, ILMN_1219080, ILMN_2626143, ILMN_2446175, ILMN_2727893, ILMN_2863264, ILMN_1221199, ILMN_2696270, ILMN_1244296, ILMN_2773302, ILMN_2752074, ILMN_2711705, ILMN_2678724, ILMN_2591381, ILMN_2933431, ILMN_2632489, ILMN_2971286, ILMN_2620913, ILMN_2647282, ILMN_2603081, ILMN_1215550, ILMN_3151840, ILMN_2767996, ILMN_3149112, ILMN_2617505, ILMN_2602406, ILMN_26…	1385	238	13288	1.61247	0.951434	0.0959115	4.38405
GOTERM_BP_FAT	GO:0016311~dephosphorylation	26	1.26214	0.0076258	ILMN_2611331, ILMN_2706730, ILMN_2818964, ILMN_1219080, ILMN_1245874, ILMN_2727893, ILMN_2643832, ILMN_1257193, ILMN_1221199, ILMN_1214179, ILMN_1242053, ILMN_1244296, ILMN_2711705, ILMN_2752074, ILMN_2773302, ILMN_2678724, ILMN_2778409, ILMN_2591381, ILMN_2743723, ILMN_1243291, ILMN_2971286, ILMN_2647282, ILMN_3151840, ILMN_2767996, ILMN_1259683, ILMN_1222733, ILMN_3139818, ILMN_2617505, ILMN_26…	1454	141	13588	1.72324	1	0.22725	12.9763
GOTERM_BP_FAT	GO:0006470~protein amino acid dephosphorylation	22	1.06796	0.00894697	ILMN_2706730, ILMN_2611331, ILMN_2818964, ILMN_1219080, ILMN_1245874, ILMN_2727893, ILMN_2643832, ILMN_1221199, ILMN_1257193, ILMN_1214179, ILMN_1242053, ILMN_1244296, ILMN_2711705, ILMN_2752074, ILMN_2773302, ILMN_2678724, ILMN_1243291, ILMN_2743723, ILMN_2591381, ILMN_2647282, ILMN_3151840, ILMN_2767996, ILMN_1259683, ILMN_1222733, ILMN_2602406, ILMN_3112011, ILMN_2705003, ILMN_2833772	1454	114	13588	1.80347	1	0.249999	15.0561
INTERPRO	IPR000340:Protein-tyrosine phosphatase, dual specificity	8	0.38835	0.0611593	ILMN_1259683, ILMN_2818964, ILMN_1219080, ILMN_2602406, ILMN_1244296, ILMN_3112011, ILMN_2711705, ILMN_2773302, ILMN_2678724, ILMN_2767996	1876	34	17763	2.22789	1	0.937618	66.9374
INTERPRO	IPR000340:Dual specificity phosphatase, catalytic domain	8	0.38835	0.0891046	ILMN_1259683, ILMN_2818964, ILMN_1219080, ILMN_2602406, ILMN_1244296, ILMN_3112011, ILMN_2711705, ILMN_2773302, ILMN_2678724, ILMN_2767996	1876	37	17763	2.04725	1	0.965159	80.538
GOTERM_MF_FAT	GO:0008138~protein tyrosine/serine/threonine phosphatase activity	8	0.38835	0.0943971	ILMN_1259683, ILMN_2818964, ILMN_1219080, ILMN_2602406, ILMN_1244296, ILMN_3112011, ILMN_2711705, ILMN_2773302, ILMN_2678724, ILMN_2767996	1385	38	13288	2.01984	1	0.723466	79.4279
INTERPRO	IPR016130:Protein-tyrosine phosphatase, active site	14	0.679612	0.125138	ILMN_2611331, ILMN_2706730, ILMN_2818964, ILMN_1219080, ILMN_1245874, ILMN_2647282, ILMN_2767996, ILMN_1259683, ILMN_1222733, ILMN_2617505, ILMN_2602406, ILMN_1244296, ILMN_3112011, ILMN_2711705, ILMN_2773302, ILMN_2778409, ILMN_2678724, ILMN_1243291, ILMN_2743723	1876	87	17763	1.52367	1	0.982905	90.4109
INTERPRO	IPR000387:Protein-tyrosine phosphatase	12	0.582524	0.196842	ILMN_2706730, ILMN_2611331, ILMN_2818964, ILMN_1219080, ILMN_1245874, ILMN_2647282, ILMN_2767996, ILMN_1259683, ILMN_1222733, ILMN_2602406, ILMN_3112011, ILMN_1244296, ILMN_2711705, ILMN_2773302, ILMN_2678724, ILMN_1243291, ILMN_2743723	1876	78	17763	1.4567	1	0.994505	97.8597
INTERPRO	IPR000387:Dual-specific/protein-tyrosine phosphatase, conserved region	12	0.582524	0.244822	ILMN_2706730, ILMN_2611331, ILMN_2818964, ILMN_1219080, ILMN_1245874, ILMN_2647282, ILMN_2767996, ILMN_1259683, ILMN_1222733, ILMN_2602406, ILMN_3112011, ILMN_1244296, ILMN_2711705, ILMN_2773302, ILMN_2678724, ILMN_1243291, ILMN_2743723	1876	82	17763	1.38564	1	0.997113	99.2734
GOTERM_MF_FAT	GO:0004725~protein tyrosine phosphatase activity	14	0.679612	0.250666	ILMN_2611331, ILMN_2706730, ILMN_2818964, ILMN_1219080, ILMN_1245874, ILMN_2647282, ILMN_2767996, ILMN_1259683, ILMN_1222733, ILMN_2617505, ILMN_2602406, ILMN_1244296, ILMN_3112011, ILMN_2711705, ILMN_2773302, ILMN_2778409, ILMN_2678724, ILMN_1243291, ILMN_2743723	1385	101	13288	1.32989	1	0.919894	98.9967
UP_SEQ_FEATURE	domain:Tyrosine-protein phosphatase	9	0.436893	0.325968	ILMN_2706730, ILMN_2611331, ILMN_2818964, ILMN_1219080, ILMN_1245874, ILMN_2647282, ILMN_2767996, ILMN_1259683, ILMN_1222733, ILMN_2602406, ILMN_2711705, ILMN_2678724, ILMN_1243291, ILMN_2743723	1937	54	16021	1.37851	1	0.999999	99.9349
SP_PIR_KEYWORDS	phosphoric monoester hydrolase	6	0.291262	0.402048	ILMN_2706730, ILMN_2611331, ILMN_2661287, ILMN_2971286, ILMN_1245874, ILMN_2647282, ILMN_2705003, ILMN_2743723, ILMN_1243291	1951	38	17854	1.44493	1	0.850552	99.9391
UP_SEQ_FEATURE	active site:Phosphocysteine intermediate	11	0.533981	0.421258	ILMN_2706730, ILMN_2611331, ILMN_2818964, ILMN_1219080, ILMN_1245874, ILMN_2647282, ILMN_2767996, ILMN_1259683, ILMN_1222733, ILMN_2602406, ILMN_1244296, ILMN_2711705, ILMN_2678724, ILMN_2778409, ILMN_1243291, ILMN_2743723	1937	75	16021	1.21309	1	1	99.9962
SMART	SM00195:DSPc	4	0.194175	0.496842	ILMN_2818964, ILMN_1219080, ILMN_3112011, ILMN_2678724, ILMN_2767996	960	25	9131	1.52183	1	0.963555	99.9917
SMART	SM00194:PTPc	4	0.194175	0.819782	ILMN_2706730, ILMN_2611331, ILMN_1222733, ILMN_1245874, ILMN_2647282, ILMN_2743723, ILMN_1243291	960	41	9131	0.927947	1	0.997599	100
INTERPRO	IPR000242:Protein-tyrosine phosphatase, receptor/non-receptor type	4	0.194175	0.822214	ILMN_2706730, ILMN_2611331, ILMN_1222733, ILMN_1245874, ILMN_2647282, ILMN_2743723, ILMN_1243291	1876	41	17763	0.923761	1	1	100
Annotation Cluster 83	Enrichment Score: 1.082622003026588
Category	Term	Count	%	PValue	Genes	List Total	Pop Hits	Pop Total	Fold Enrichment	Bonferroni	Benjamini	FDR
GOTERM_MF_FAT	GO:0016887~ATPase activity	43	2.08738	0.0103367	ILMN_2973897, ILMN_1234672, ILMN_3034877, ILMN_2685157, ILMN_2637203, ILMN_2755140, ILMN_2598972, ILMN_1216987, ILMN_2710538, ILMN_2977129, ILMN_2758632, ILMN_2758631, ILMN_2699880, ILMN_2697652, ILMN_1249522, ILMN_2892376, ILMN_3161767, ILMN_3104271, ILMN_1246999, ILMN_2718700, ILMN_1221703, ILMN_2683374, ILMN_1260383, ILMN_2997308, ILMN_2768926, ILMN_1224598, ILMN_2617925, ILMN_2751194, ILMN_12…	1385	281	13288	1.46816	0.999986	0.243842	15.2699
SP_PIR_KEYWORDS	helicase	22	1.06796	0.0196482	ILMN_1234672, ILMN_3154810, ILMN_2617925, ILMN_1224598, ILMN_1249708, ILMN_2751194, ILMN_2736611, ILMN_2944784, ILMN_2710538, ILMN_2844316, ILMN_2690410, ILMN_2697652, ILMN_2816547, ILMN_2703082, ILMN_1218154, ILMN_3161767, ILMN_2892376, ILMN_3021465, ILMN_2801380, ILMN_1246999, ILMN_2666487, ILMN_2677379, ILMN_2666483, ILMN_2774825	1951	120	17854	1.67772	0.99995	0.143345	24.8496
GOTERM_MF_FAT	GO:0004386~helicase activity	22	1.06796	0.025508	ILMN_1234672, ILMN_3154810, ILMN_2617925, ILMN_1224598, ILMN_1249708, ILMN_2751194, ILMN_2736611, ILMN_2944784, ILMN_2710538, ILMN_2844316, ILMN_2690410, ILMN_2697652, ILMN_2816547, ILMN_2703082, ILMN_1218154, ILMN_3161767, ILMN_2892376, ILMN_3021465, ILMN_2801380, ILMN_1246999, ILMN_2666487, ILMN_2677379, ILMN_2666483, ILMN_2774825	1385	129	13288	1.63622	1	0.414136	33.7714
GOTERM_MF_FAT	GO:0070035~purine NTP-dependent helicase activity	16	0.776699	0.0312476	ILMN_1234672, ILMN_2617925, ILMN_1224598, ILMN_1249708, ILMN_2751194, ILMN_2736611, ILMN_2944784, ILMN_2710538, ILMN_2844316, ILMN_2697652, ILMN_2816547, ILMN_2703082, ILMN_1218154, ILMN_2892376, ILMN_3161767, ILMN_2801380, ILMN_1246999	1385	86	13288	1.78497	1	0.450793	39.7256
GOTERM_MF_FAT	GO:0008026~ATP-dependent helicase activity	16	0.776699	0.0312476	ILMN_1234672, ILMN_2617925, ILMN_1224598, ILMN_1249708, ILMN_2751194, ILMN_2736611, ILMN_2944784, ILMN_2710538, ILMN_2844316, ILMN_2697652, ILMN_2816547, ILMN_2703082, ILMN_1218154, ILMN_2892376, ILMN_3161767, ILMN_2801380, ILMN_1246999	1385	86	13288	1.78497	1	0.450793	39.7256
GOTERM_MF_FAT	GO:0042623~ATPase activity, coupled	33	1.60194	0.0380709	ILMN_2973897, ILMN_1234672, ILMN_2685157, ILMN_2637203, ILMN_2755140, ILMN_2598972, ILMN_2710538, ILMN_2977129, ILMN_2758632, ILMN_2758631, ILMN_2697652, ILMN_2892376, ILMN_3161767, ILMN_3104271, ILMN_2718700, ILMN_1246999, ILMN_2683374, ILMN_2997308, ILMN_1224598, ILMN_2617925, ILMN_2751194, ILMN_1249708, ILMN_2736611, ILMN_2944784, ILMN_1240620, ILMN_2844316, ILMN_2816547, ILMN_1218154, ILMN_27…	1385	223	13288	1.41977	1	0.513285	46.1508
INTERPRO	IPR001650:DNA/RNA helicase, C-terminal	17	0.825243	0.0593456	ILMN_1234672, ILMN_3154810, ILMN_2617925, ILMN_1224598, ILMN_1249708, ILMN_2751194, ILMN_2944784, ILMN_2844316, ILMN_2697652, ILMN_2816547, ILMN_2703082, ILMN_1218154, ILMN_2892376, ILMN_3161767, ILMN_3021465, ILMN_2801380, ILMN_1246999, ILMN_2677379	1876	100	17763	1.60965	1	0.938768	65.7992
SMART	SM00487:DEXDc	17	0.825243	0.0706167	ILMN_1234672, ILMN_3154810, ILMN_2617925, ILMN_1224598, ILMN_1249708, ILMN_2751194, ILMN_2944784, ILMN_2844316, ILMN_2697652, ILMN_2816547, ILMN_2703082, ILMN_1218154, ILMN_2892376, ILMN_3161767, ILMN_3021465, ILMN_2801380, ILMN_1246999, ILMN_2677379	960	103	9131	1.56985	1	0.761201	63.3023
INTERPRO	IPR014001:DEAD-like helicase, N-terminal	17	0.825243	0.0737426	ILMN_1234672, ILMN_3154810, ILMN_2617925, ILMN_1224598, ILMN_1249708, ILMN_2751194, ILMN_2944784, ILMN_2844316, ILMN_2697652, ILMN_2816547, ILMN_2703082, ILMN_1218154, ILMN_2892376, ILMN_3161767, ILMN_3021465, ILMN_2801380, ILMN_1246999, ILMN_2677379	1876	103	17763	1.56277	1	0.94927	73.9045
SMART	SM00490:HELICc	16	0.776699	0.092558	ILMN_1234672, ILMN_3154810, ILMN_2617925, ILMN_1224598, ILMN_1249708, ILMN_2751194, ILMN_2944784, ILMN_2844316, ILMN_2697652, ILMN_2816547, ILMN_2703082, ILMN_1218154, ILMN_2892376, ILMN_3161767, ILMN_2801380, ILMN_1246999, ILMN_2677379	960	99	9131	1.53721	1	0.788601	73.5388
INTERPRO	IPR014021:Helicase, superfamily 1 and 2, ATP-binding	16	0.776699	0.096201	ILMN_1234672, ILMN_3154810, ILMN_2617925, ILMN_1224598, ILMN_1249708, ILMN_2751194, ILMN_2944784, ILMN_2844316, ILMN_2697652, ILMN_2816547, ILMN_2703082, ILMN_1218154, ILMN_2892376, ILMN_3161767, ILMN_2801380, ILMN_1246999, ILMN_2677379	1876	99	17763	1.53027	1	0.970732	83.0324
INTERPRO	IPR000629:RNA helicase, ATP-dependent, DEAD-box, conserved site	7	0.339806	0.101942	ILMN_1234672, ILMN_1224598, ILMN_2751194, ILMN_1249708, ILMN_2801380, ILMN_1246999, ILMN_2944784, ILMN_2844316	1876	31	17763	2.13806	1	0.9697	84.8264
UP_SEQ_FEATURE	short sequence motif:DEAD box	7	0.339806	0.146372	ILMN_1234672, ILMN_1224598, ILMN_2751194, ILMN_1249708, ILMN_2801380, ILMN_1246999, ILMN_2944784, ILMN_2844316	1937	30	16021	1.92991	1	0.999917	94.7334
UP_SEQ_FEATURE	domain:Helicase C-terminal	15	0.728155	0.15124	ILMN_1234672, ILMN_3154810, ILMN_1224598, ILMN_2617925, ILMN_1249708, ILMN_2751194, ILMN_2944784, ILMN_2844316, ILMN_2697652, ILMN_2816547, ILMN_2703082, ILMN_1218154, ILMN_2892376, ILMN_3021465, ILMN_2801380, ILMN_1246999	1937	86	16021	1.44262	1	0.999932	95.2649
INTERPRO	IPR014014:RNA helicase, DEAD-box type, Q motif	7	0.339806	0.158152	ILMN_1234672, ILMN_1224598, ILMN_2751194, ILMN_1249708, ILMN_2801380, ILMN_1246999, ILMN_2944784, ILMN_2844316	1876	35	17763	1.89371	1	0.989869	95.1157
INTERPRO	IPR002464:DNA/RNA helicase, ATP-dependent, DEAH-box type, conserved site	6	0.291262	0.204697	ILMN_2697652, ILMN_2816547, ILMN_2703082, ILMN_2892376, ILMN_2617925, ILMN_3161767	1876	30	17763	1.89371	1	0.994902	98.1986
INTERPRO	IPR011545:DNA/RNA helicase, DEAD/DEAH box type, N-terminal	9	0.436893	0.220226	ILMN_1234672, ILMN_2892376, ILMN_2617925, ILMN_1224598, ILMN_2751194, ILMN_1249708, ILMN_2801380, ILMN_1246999, ILMN_2944784, ILMN_2844316	1876	55	17763	1.5494	1	0.996194	98.7252
PIR_SUPERFAMILY	PIRSF001321:ATP-dependent RNA helicase	3	0.145631	0.257404	ILMN_1234672, ILMN_1224598, ILMN_2751194, ILMN_2944784	801	10	8136	3.04719	1	1	99.0433
UP_SEQ_FEATURE	domain:Helicase ATP-binding	14	0.679612	0.275408	ILMN_1234672, ILMN_3154810, ILMN_1224598, ILMN_2617925, ILMN_1249708, ILMN_2751194, ILMN_2944784, ILMN_2844316, ILMN_2697652, ILMN_2816547, ILMN_2703082, ILMN_1218154, ILMN_2892376, ILMN_2801380, ILMN_1246999	1937	89	16021	1.30106	1	0.999999	99.7502
UP_SEQ_FEATURE	short sequence motif:Q motif	6	0.291262	0.368314	ILMN_1234672, ILMN_1224598, ILMN_2751194, ILMN_1249708, ILMN_2801380, ILMN_1246999, ILMN_2944784	1937	33	16021	1.50383	1	1	99.9805
Annotation Cluster 84	Enrichment Score: 1.066195651424554
Category	Term	Count	%	PValue	Genes	List Total	Pop Hits	Pop Total	Fold Enrichment	Bonferroni	Benjamini	FDR
INTERPRO	IPR006195:Aminoacyl-tRNA synthetase, class II, conserved region	6	0.291262	0.0273011	ILMN_3139479, ILMN_2871412, ILMN_3102333, ILMN_2589477, ILMN_2606848, ILMN_2749382, ILMN_1237234, ILMN_2688721	1876	17	17763	3.34184	1	0.790832	38.4576
INTERPRO	IPR004365:Nucleic acid binding, OB-fold, tRNA/helicase-type	4	0.194175	0.0800259	ILMN_3102333, ILMN_2589477, ILMN_2606848, ILMN_2837156, ILMN_2688721	1876	10	17763	3.78742	1	0.956851	76.8408
INTERPRO	IPR018150:Aminoacyl-tRNA synthetase, class II (D, K and N)-like	3	0.145631	0.0896844	ILMN_3102333, ILMN_2589477, ILMN_2606848, ILMN_2688721	1876	5	17763	5.68113	1	0.964186	80.7541
INTERPRO	IPR004364:Aminoacyl-tRNA synthetase, class II (D, K and N)	3	0.145631	0.0896844	ILMN_3102333, ILMN_2589477, ILMN_2606848, ILMN_2688721	1876	5	17763	5.68113	1	0.964186	80.7541
INTERPRO	IPR012340:Nucleic acid-binding, OB-fold	9	0.436893	0.265569	ILMN_2828819, ILMN_2686044, ILMN_3102333, ILMN_2589477, ILMN_2842366, ILMN_2606848, ILMN_2837156, ILMN_2968032, ILMN_2678828, ILMN_1239806, ILMN_2688721	1876	58	17763	1.46926	1	0.998094	99.5542
Annotation Cluster 85	Enrichment Score: 1.0568395058899156
Category	Term	Count	%	PValue	Genes	List Total	Pop Hits	Pop Total	Fold Enrichment	Bonferroni	Benjamini	FDR
SP_PIR_KEYWORDS	signalosome	4	0.194175	0.0660243	ILMN_2740523, ILMN_2601090, ILMN_2628283, ILMN_2875812, ILMN_2682787, ILMN_1217296	1951	9	17854	4.0672	1	0.365206	62.5941
GOTERM_CC_FAT	GO:0008180~signalosome	4	0.194175	0.0753866	ILMN_2740523, ILMN_2601090, ILMN_2628283, ILMN_2875812, ILMN_2682787, ILMN_1217296	1289	10	12504	3.88022	1	0.373499	67.904
SMART	SM00088:PINT	5	0.242718	0.0789989	ILMN_2740523, ILMN_2601090, ILMN_2776271, ILMN_2628283, ILMN_2875812, ILMN_2682787, ILMN_1217296	960	16	9131	2.97233	1	0.782293	67.5825
INTERPRO	IPR000717:Proteasome component region PCI	5	0.242718	0.0802677	ILMN_2740523, ILMN_2601090, ILMN_2776271, ILMN_2628283, ILMN_2875812, ILMN_2682787, ILMN_1217296	1876	16	17763	2.95892	1	0.955119	76.9473
UP_SEQ_FEATURE	domain:PCI	5	0.242718	0.164681	ILMN_2740523, ILMN_2601090, ILMN_2776271, ILMN_2628283, ILMN_2875812, ILMN_2682787, ILMN_1217296	1937	18	16021	2.29751	1	0.999952	96.4813
Annotation Cluster 86	Enrichment Score: 1.0528123445520114
Category	Term	Count	%	PValue	Genes	List Total	Pop Hits	Pop Total	Fold Enrichment	Bonferroni	Benjamini	FDR
BIOCARTA	m_ceramidePathway:Ceramide Signaling Pathway	8	0.38835	0.0258586	ILMN_2920549, ILMN_2688569, ILMN_2753492, ILMN_2728521, ILMN_1225324, ILMN_2649828, ILMN_2601071, ILMN_1213055, ILMN_2747229, ILMN_3097868, ILMN_2592476	166	22	1171	2.56517	0.996026	0.668984	28.1976
BIOCARTA	m_keratinocytePathway:Keratinocyte Differentiation	10	0.485437	0.0853716	ILMN_3028981, ILMN_2920549, ILMN_3157483, ILMN_2753492, ILMN_2649828, ILMN_2601071, ILMN_1213055, ILMN_1247147, ILMN_2747229, ILMN_1223624, ILMN_2589556, ILMN_2592476	166	39	1171	1.80877	1	0.691742	67.6417
BIOCARTA	m_cdMacPathway:Cadmium induces DNA synthesis and proliferation in macrophages	4	0.194175	0.314518	ILMN_2649828, ILMN_2601071, ILMN_1213055, ILMN_2747229, ILMN_1223624, ILMN_2592476	166	14	1171	2.01549	1	0.850005	99.1559
Annotation Cluster 87	Enrichment Score: 1.045412699823388
Category	Term	Count	%	PValue	Genes	List Total	Pop Hits	Pop Total	Fold Enrichment	Bonferroni	Benjamini	FDR
GOTERM_MF_FAT	GO:0051015~actin filament binding	11	0.533981	0.0274262	ILMN_2879745, ILMN_2630605, ILMN_2879746, ILMN_2632839, ILMN_2669189, ILMN_2821263, ILMN_2861469, ILMN_1223406, ILMN_2672767, ILMN_2780205, ILMN_2710604, ILMN_1216871, ILMN_2845214	1385	49	13288	2.15381	1	0.425426	35.8201
GOTERM_BP_FAT	GO:0051017~actin filament bundle formation	5	0.242718	0.0680589	ILMN_2672767, ILMN_1216871, ILMN_2710604, ILMN_2669189, ILMN_2632839	1454	15	13588	3.11508	1	0.674555	72.1904
GOTERM_BP_FAT	GO:0007015~actin filament organization	8	0.38835	0.391482	ILMN_2972459, ILMN_2672767, ILMN_1216871, ILMN_2710604, ILMN_2669189, ILMN_2632839, ILMN_3116504, ILMN_2743133	1454	56	13588	1.33504	1	0.982314	99.9879
Annotation Cluster 88	Enrichment Score: 1.0085609205749362
Category	Term	Count	%	PValue	Genes	List Total	Pop Hits	Pop Total	Fold Enrichment	Bonferroni	Benjamini	FDR
INTERPRO	IPR011524:SARAH	5	0.242718	0.0100789	ILMN_2958410, ILMN_1226997, ILMN_2825020, ILMN_3004142, ILMN_2647435	1876	9	17763	5.26031	1	0.632867	16.2768
UP_SEQ_FEATURE	domain:SARAH	5	0.242718	0.0162099	ILMN_2958410, ILMN_1226997, ILMN_2825020, ILMN_3004142, ILMN_2647435	1937	9	16021	4.59502	1	0.956723	26.2132
UP_SEQ_FEATURE	domain:Ras-associating	7	0.339806	0.222151	ILMN_2972541, ILMN_1226997, ILMN_1243107, ILMN_2825020, ILMN_2518412, ILMN_2647435, ILMN_3159720	1937	34	16021	1.70286	1	0.99999	99.0656
SMART	SM00314:RA	6	0.291262	0.497418	ILMN_1226997, ILMN_1243107, ILMN_2825020, ILMN_2518412, ILMN_2647435, ILMN_3159720	960	44	9131	1.29702	1	0.962093	99.9919
INTERPRO	IPR000159:Ras-association	6	0.291262	0.501915	ILMN_1226997, ILMN_1243107, ILMN_2825020, ILMN_2518412, ILMN_2647435, ILMN_3159720	1876	44	17763	1.29117	1	0.999941	99.9995
Annotation Cluster 89	Enrichment Score: 1.0060960458201824
Category	Term	Count	%	PValue	Genes	List Total	Pop Hits	Pop Total	Fold Enrichment	Bonferroni	Benjamini	FDR
GOTERM_BP_FAT	GO:0006732~coenzyme metabolic process	24	1.16505	0.0299936	ILMN_2940195, ILMN_1240770, ILMN_2808355, ILMN_1247221, ILMN_1235717, ILMN_2906489, ILMN_2680533, ILMN_2997022, ILMN_2895847, ILMN_2693985, ILMN_2594149, ILMN_2607951, ILMN_2757008, ILMN_3014965, ILMN_3086201, ILMN_3122427, ILMN_2453086, ILMN_2774456, ILMN_1231116, ILMN_2748837, ILMN_2675261, ILMN_2734181, ILMN_2689581, ILMN_2644140, ILMN_2898403, ILMN_3141499	1454	143	13588	1.56843	1	0.49287	42.4732
GOTERM_BP_FAT	GO:0051186~cofactor metabolic process	28	1.35922	0.0493458	ILMN_2826816, ILMN_2709397, ILMN_2940195, ILMN_1240770, ILMN_2665063, ILMN_2808355, ILMN_1247221, ILMN_1235717, ILMN_2906489, ILMN_2680533, ILMN_2764301, ILMN_2997022, ILMN_2895847, ILMN_2693985, ILMN_2594149, ILMN_2607951, ILMN_2757008, ILMN_3014965, ILMN_3086201, ILMN_3122427, ILMN_2453086, ILMN_2959956, ILMN_2774456, ILMN_2748837, ILMN_1231116, ILMN_2734181, ILMN_2689581, ILMN_2675261, ILMN_26…	1454	182	13588	1.43773	1	0.60528	60.101
GOTERM_BP_FAT	GO:0009108~coenzyme biosynthetic process	10	0.485437	0.241692	ILMN_1231116, ILMN_1235717, ILMN_2607951, ILMN_2734181, ILMN_2906489, ILMN_1240770, ILMN_2644140, ILMN_2898403, ILMN_2774456, ILMN_2895847, ILMN_2808355	1454	64	13588	1.4602	1	0.936751	99.3417
GOTERM_BP_FAT	GO:0051188~cofactor biosynthetic process	13	0.631068	0.264286	ILMN_2607951, ILMN_2826816, ILMN_1240770, ILMN_2665063, ILMN_2959956, ILMN_2774456, ILMN_2808355, ILMN_1231116, ILMN_1235717, ILMN_2734181, ILMN_2906489, ILMN_2644140, ILMN_2898403, ILMN_2764301, ILMN_2895847	1454	91	13588	1.33504	1	0.946904	99.6199
Annotation Cluster 90	Enrichment Score: 0.9744029334468759
Category	Term	Count	%	PValue	Genes	List Total	Pop Hits	Pop Total	Fold Enrichment	Bonferroni	Benjamini	FDR
SMART	SM00558:JmjC	8	0.38835	0.0447571	ILMN_2896492, ILMN_3023230, ILMN_2884968, ILMN_3118169, ILMN_2821736, ILMN_2972325, ILMN_1243903, ILMN_1220617, ILMN_3043245	960	32	9131	2.37786	1	0.683769	46.5693
INTERPRO	IPR003347:Transcription factor jumonji/aspartyl beta-hydroxylase	8	0.38835	0.0459534	ILMN_2896492, ILMN_3023230, ILMN_2884968, ILMN_3118169, ILMN_2821736, ILMN_2972325, ILMN_1243903, ILMN_1220617, ILMN_3043245	1876	32	17763	2.36714	1	0.892857	56.1766
UP_SEQ_FEATURE	domain:JmjC	8	0.38835	0.0835411	ILMN_2896492, ILMN_3023230, ILMN_2884968, ILMN_3118169, ILMN_2821736, ILMN_2972325, ILMN_1243903, ILMN_1220617, ILMN_3043245	1937	32	16021	2.06776	1	0.998852	80.2637
INTERPRO	IPR013129:Transcription factor jumonji	3	0.145631	0.736731	ILMN_3023230, ILMN_3118169, ILMN_1220617, ILMN_3043245	1876	24	17763	1.18357	1	1	100
Annotation Cluster 91	Enrichment Score: 0.9686056907602231
Category	Term	Count	%	PValue	Genes	List Total	Pop Hits	Pop Total	Fold Enrichment	Bonferroni	Benjamini	FDR
GOTERM_BP_FAT	GO:0045834~positive regulation of lipid metabolic process	8	0.38835	0.0106116	ILMN_2792089, ILMN_2659616, ILMN_2739295, ILMN_1216042, ILMN_2992232, ILMN_1238736, ILMN_2946862, ILMN_1232458	1454	24	13588	3.11508	1	0.277749	17.6095
GOTERM_BP_FAT	GO:0045923~positive regulation of fatty acid metabolic process	3	0.145631	0.167107	ILMN_2792089, ILMN_2992232, ILMN_1232458	1454	7	13588	4.00511	1	0.877089	96.3846
GOTERM_BP_FAT	GO:0010565~regulation of cellular ketone metabolic process	5	0.242718	0.226737	ILMN_2792089, ILMN_3136205, ILMN_2695964, ILMN_2992232, ILMN_1232458	1454	23	13588	2.03158	1	0.929173	99.0616
GOTERM_BP_FAT	GO:0019217~regulation of fatty acid metabolic process	4	0.194175	0.332109	ILMN_2792089, ILMN_3136205, ILMN_2992232, ILMN_1232458	1454	19	13588	1.96742	1	0.969187	99.9344
Annotation Cluster 92	Enrichment Score: 0.9657246744435023
Category	Term	Count	%	PValue	Genes	List Total	Pop Hits	Pop Total	Fold Enrichment	Bonferroni	Benjamini	FDR
SMART	SM00398:HMG	10	0.485437	0.0815907	ILMN_3109289, ILMN_2610600, ILMN_2913544, ILMN_2641647, ILMN_1246992, ILMN_1232386, ILMN_2880246, ILMN_2889482, ILMN_2968479, ILMN_1238509, ILMN_3092415, ILMN_2653251	960	51	9131	1.86499	1	0.776417	68.8092
INTERPRO	IPR000910:High mobility group, HMG1/HMG2	10	0.485437	0.0839181	ILMN_3109289, ILMN_2610600, ILMN_2913544, ILMN_2641647, ILMN_1246992, ILMN_1232386, ILMN_2880246, ILMN_2889482, ILMN_2968479, ILMN_1238509, ILMN_3092415, ILMN_2653251	1876	51	17763	1.85658	1	0.959288	78.5004
UP_SEQ_FEATURE	DNA-binding region:HMG box	8	0.38835	0.185067	ILMN_3109289, ILMN_2610600, ILMN_2913544, ILMN_2641647, ILMN_1232386, ILMN_2880246, ILMN_2889482, ILMN_2968479, ILMN_3092415, ILMN_2653251	1937	39	16021	1.69662	1	0.999978	97.7778
Annotation Cluster 93	Enrichment Score: 0.9639824291230181
Category	Term	Count	%	PValue	Genes	List Total	Pop Hits	Pop Total	Fold Enrichment	Bonferroni	Benjamini	FDR
GOTERM_BP_FAT	GO:0031667~response to nutrient levels	20	0.970874	0.0358267	ILMN_1254639, ILMN_2686183, ILMN_2792089, ILMN_1238520, ILMN_1220170, ILMN_2466845, ILMN_2667889, ILMN_1246724, ILMN_2592519, ILMN_1233838, ILMN_2928160, ILMN_2439341, ILMN_2632230, ILMN_2751865, ILMN_2928560, ILMN_2694156, ILMN_2652909, ILMN_2912532, ILMN_2695964, ILMN_2666018, ILMN_2885016, ILMN_2967528, ILMN_2850077	1454	115	13588	1.62526	1	0.525997	48.4405
GOTERM_BP_FAT	GO:0031669~cellular response to nutrient levels	7	0.339806	0.0716143	ILMN_2686183, ILMN_1254639, ILMN_2632230, ILMN_2792089, ILMN_2667889, ILMN_2466845, ILMN_2592519	1454	28	13588	2.33631	1	0.686692	74.0549
GOTERM_BP_FAT	GO:0009991~response to extracellular stimulus	21	1.01942	0.0731505	ILMN_1254639, ILMN_2686183, ILMN_2792089, ILMN_1238520, ILMN_1220170, ILMN_1246724, ILMN_2466845, ILMN_2667889, ILMN_2592519, ILMN_1233838, ILMN_2928160, ILMN_2439341, ILMN_2808336, ILMN_2632230, ILMN_2751865, ILMN_2928560, ILMN_2694156, ILMN_2652909, ILMN_2912532, ILMN_2695964, ILMN_2666018, ILMN_2885016, ILMN_2967528, ILMN_2850077	1454	133	13588	1.47557	1	0.691206	74.8235
GOTERM_BP_FAT	GO:0042594~response to starvation	6	0.291262	0.192537	ILMN_2686183, ILMN_2632230, ILMN_2792089, ILMN_1246724, ILMN_2466845, ILMN_2592519	1454	29	13588	1.9335	1	0.904032	97.941
GOTERM_BP_FAT	GO:0031668~cellular response to extracellular stimulus	8	0.38835	0.200745	ILMN_2686183, ILMN_1254639, ILMN_2632230, ILMN_2792089, ILMN_2667889, ILMN_2466845, ILMN_2592519, ILMN_2808336	1454	45	13588	1.66138	1	0.911333	98.2897
GOTERM_BP_FAT	GO:0009267~cellular response to starvation	5	0.242718	0.226737	ILMN_2686183, ILMN_2632230, ILMN_2792089, ILMN_2466845, ILMN_2592519	1454	23	13588	2.03158	1	0.929173	99.0616
Annotation Cluster 94	Enrichment Score: 0.9550301124841812
Category	Term	Count	%	PValue	Genes	List Total	Pop Hits	Pop Total	Fold Enrichment	Bonferroni	Benjamini	FDR
GOTERM_BP_FAT	GO:0051168~nuclear export	7	0.339806	0.0616033	ILMN_3162184, ILMN_1222803, ILMN_1223793, ILMN_2923599, ILMN_1239569, ILMN_2698282, ILMN_2654013	1454	27	13588	2.42284	1	0.653405	68.4769
GOTERM_BP_FAT	GO:0006406~mRNA export from nucleus	4	0.194175	0.104814	ILMN_3162184, ILMN_1223793, ILMN_2698282, ILMN_2654013	1454	11	13588	3.39827	1	0.786255	86.6062
GOTERM_BP_FAT	GO:0006405~RNA export from nucleus	4	0.194175	0.211294	ILMN_3162184, ILMN_1223793, ILMN_2698282, ILMN_2654013	1454	15	13588	2.49207	1	0.917886	98.6563
Annotation Cluster 95	Enrichment Score: 0.9523200297968043
Category	Term	Count	%	PValue	Genes	List Total	Pop Hits	Pop Total	Fold Enrichment	Bonferroni	Benjamini	FDR
GOTERM_CC_FAT	GO:0000228~nuclear chromosome	20	0.970874	0.0406694	ILMN_2683190, ILMN_2667889, ILMN_2854962, ILMN_1215091, ILMN_3055904, ILMN_1232386, ILMN_3163539, ILMN_2907878, ILMN_1260420, ILMN_2641613, ILMN_1252310, ILMN_1254840, ILMN_2996601, ILMN_1227225, ILMN_3145213, ILMN_2971204, ILMN_2791963, ILMN_2734152, ILMN_2420070, ILMN_2845214, ILMN_1243875, ILMN_2932539	1289	121	12504	1.6034	1	0.274254	45.2285
GOTERM_CC_FAT	GO:0005720~nuclear heterochromatin	8	0.38835	0.0626465	ILMN_1252310, ILMN_1254840, ILMN_3055904, ILMN_1227225, ILMN_3145213, ILMN_2907878, ILMN_2932539, ILMN_2641613	1289	35	12504	2.21727	1	0.335828	60.8599
GOTERM_CC_FAT	GO:0000803~sex chromosome	6	0.291262	0.0687749	ILMN_2717613, ILMN_1254840, ILMN_2770759, ILMN_3145213, ILMN_2907878, ILMN_2932539, ILMN_2641613	1289	22	12504	2.6456	1	0.359393	64.4108
GOTERM_CC_FAT	GO:0000792~heterochromatin	10	0.485437	0.074238	ILMN_1252310, ILMN_2733514, ILMN_1254840, ILMN_2730498, ILMN_3055904, ILMN_1227225, ILMN_3145213, ILMN_2907878, ILMN_2932539, ILMN_2641613	1289	51	12504	1.90207	1	0.372172	67.3211
GOTERM_CC_FAT	GO:0044454~nuclear chromosome part	16	0.776699	0.106169	ILMN_2683190, ILMN_1215091, ILMN_2854962, ILMN_3055904, ILMN_3163539, ILMN_2907878, ILMN_1260420, ILMN_2641613, ILMN_1252310, ILMN_1254840, ILMN_2996601, ILMN_1227225, ILMN_2971204, ILMN_3145213, ILMN_2791963, ILMN_2734152, ILMN_1243875, ILMN_2932539	1289	103	12504	1.50688	1	0.458711	80.3553
GOTERM_CC_FAT	GO:0001739~sex chromatin	5	0.242718	0.164013	ILMN_1254840, ILMN_3145213, ILMN_2907878, ILMN_2932539, ILMN_2641613	1289	21	12504	2.30965	1	0.568172	92.5534
GOTERM_CC_FAT	GO:0001741~XY body	3	0.145631	0.315461	ILMN_1254840, ILMN_2907878, ILMN_2641613	1289	11	12504	2.6456	1	0.775996	99.5894
GOTERM_CC_FAT	GO:0000790~nuclear chromatin	8	0.38835	0.336821	ILMN_1252310, ILMN_1254840, ILMN_3055904, ILMN_1227225, ILMN_3145213, ILMN_2907878, ILMN_2932539, ILMN_2641613	1289	55	12504	1.41099	1	0.792762	99.7407
Annotation Cluster 96	Enrichment Score: 0.9522204726450114
Category	Term	Count	%	PValue	Genes	List Total	Pop Hits	Pop Total	Fold Enrichment	Bonferroni	Benjamini	FDR
INTERPRO	IPR014778:Myb, DNA-binding	9	0.436893	0.0266468	ILMN_2675433, ILMN_2758073, ILMN_3009839, ILMN_2799969, ILMN_2432040, ILMN_2762514, ILMN_2641613, ILMN_1249242, ILMN_1225235	1876	35	17763	2.43477	1	0.79067	37.7276
SMART	SM00717:SANT	10	0.485437	0.0663308	ILMN_2675433, ILMN_2758073, ILMN_3009839, ILMN_2799969, ILMN_2674228, ILMN_2432040, ILMN_2762514, ILMN_2641613, ILMN_1249242, ILMN_1225235	960	49	9131	1.94111	1	0.779074	60.9167
INTERPRO	IPR001005:SANT, DNA-binding	10	0.485437	0.0683112	ILMN_2675433, ILMN_2758073, ILMN_3009839, ILMN_2799969, ILMN_2674228, ILMN_2432040, ILMN_2762514, ILMN_2641613, ILMN_1249242, ILMN_1225235	1876	49	17763	1.93236	1	0.944764	71.0869
INTERPRO	IPR017930:Myb-type HTH DNA-binding domain	4	0.194175	0.0800259	ILMN_2675433, ILMN_2758073, ILMN_2799969, ILMN_2432040	1876	10	17763	3.78742	1	0.956851	76.8408
UP_SEQ_FEATURE	domain:SANT	5	0.242718	0.164681	ILMN_3009839, ILMN_2674228, ILMN_2762514, ILMN_2641613, ILMN_1225235	1937	18	16021	2.29751	1	0.999952	96.4813
INTERPRO	IPR015495:Myb transcription factor	3	0.145631	0.203555	ILMN_2675433, ILMN_2758073, ILMN_2799969	1876	8	17763	3.55071	1	0.994994	98.1527
INTERPRO	IPR017884:SANT, eukarya	5	0.242718	0.219844	ILMN_3009839, ILMN_2762514, ILMN_2641613, ILMN_1249242, ILMN_1225235	1876	23	17763	2.05838	1	0.99635	98.7143
UP_SEQ_FEATURE	DNA-binding region:H-T-H motif	4	0.194175	0.338622	ILMN_2675433, ILMN_2758073, ILMN_2799969, ILMN_2432040	1937	17	16021	1.94613	1	0.999999	99.9543
Annotation Cluster 97	Enrichment Score: 0.9440840715177844
Category	Term	Count	%	PValue	Genes	List Total	Pop Hits	Pop Total	Fold Enrichment	Bonferroni	Benjamini	FDR
INTERPRO	IPR004160:Translation elongation factor EFTu/EF1A, C-terminal	4	0.194175	0.0437871	ILMN_1377920, ILMN_2588052, ILMN_2462448, ILMN_2791578, ILMN_2510196	1876	8	17763	4.73428	1	0.89079	54.3984
SP_PIR_KEYWORDS	elongation factor	7	0.339806	0.0670672	ILMN_2624018, ILMN_1229042, ILMN_2669441, ILMN_1377920, ILMN_2588052, ILMN_2652394, ILMN_2686044, ILMN_2678828, ILMN_2462448, ILMN_2604097, ILMN_2930364	1951	27	17854	2.37253	1	0.366066	63.1909
INTERPRO	IPR004161:Translation elongation factor EFTu/EF1A, domain 2	5	0.242718	0.0965651	ILMN_2669441, ILMN_1377920, ILMN_2588052, ILMN_2462448, ILMN_2604097, ILMN_2791578, ILMN_2510196, ILMN_2930364	1876	17	17763	2.78487	1	0.969619	83.1519
GOTERM_MF_FAT	GO:0003746~translation elongation factor activity	7	0.339806	0.0969566	ILMN_2624018, ILMN_1229042, ILMN_2669441, ILMN_1377920, ILMN_2588052, ILMN_2652394, ILMN_2686044, ILMN_2678828, ILMN_2462448, ILMN_2604097, ILMN_2930364	1385	31	13288	2.16644	1	0.725006	80.3358
INTERPRO	IPR000795:Protein synthesis factor, GTP-binding	5	0.242718	0.114268	ILMN_2669441, ILMN_1377920, ILMN_2588052, ILMN_2462448, ILMN_2604097, ILMN_2791578, ILMN_2510196, ILMN_2930364	1876	18	17763	2.63015	1	0.976272	88.0924
GOTERM_BP_FAT	GO:0006414~translational elongation	5	0.242718	0.689153	ILMN_2624018, ILMN_1229042, ILMN_2964873, ILMN_1377920, ILMN_2588052, ILMN_2462448	1454	43	13588	1.08666	1	0.999011	100
Annotation Cluster 98	Enrichment Score: 0.934316469665108
Category	Term	Count	%	PValue	Genes	List Total	Pop Hits	Pop Total	Fold Enrichment	Bonferroni	Benjamini	FDR
GOTERM_BP_FAT	GO:0043087~regulation of GTPase activity	20	0.970874	0.00402058	ILMN_2962083, ILMN_1228165, ILMN_1222682, ILMN_2599532, ILMN_1218901, ILMN_1223713, ILMN_2620053, ILMN_1236232, ILMN_1217144, ILMN_3121578, ILMN_1251220, ILMN_1243107, ILMN_2754598, ILMN_2906471, ILMN_2648618, ILMN_2694153, ILMN_2756460, ILMN_2987294, ILMN_2906473, ILMN_1241481, ILMN_3135566, ILMN_2722583, ILMN_1238928	1454	93	13588	2.00973	0.999998	0.139042	7.05365
GOTERM_BP_FAT	GO:0032318~regulation of Ras GTPase activity	17	0.825243	0.00972848	ILMN_2962083, ILMN_1228165, ILMN_1222682, ILMN_1218901, ILMN_2620053, ILMN_1236232, ILMN_1217144, ILMN_3121578, ILMN_1251220, ILMN_1243107, ILMN_2754598, ILMN_2906471, ILMN_2648618, ILMN_2694153, ILMN_2756460, ILMN_2987294, ILMN_2906473, ILMN_1241481, ILMN_2722583, ILMN_1238928	1454	80	13588	1.98587	1	0.266454	16.2641
GOTERM_MF_FAT	GO:0005097~Rab GTPase activator activity	8	0.38835	0.154899	ILMN_1228165, ILMN_1218901, ILMN_2620053, ILMN_1213296, ILMN_2987294, ILMN_1217144, ILMN_2722583, ILMN_1251220	1385	43	13288	1.78497	1	0.818845	93.1704
GOTERM_MF_FAT	GO:0005099~Ras GTPase activator activity	10	0.485437	0.232187	ILMN_1243107, ILMN_1228165, ILMN_1218901, ILMN_1223713, ILMN_2620053, ILMN_1213296, ILMN_2987294, ILMN_1217144, ILMN_2722583, ILMN_1251220	1385	65	13288	1.47603	1	0.906432	98.5204
GOTERM_BP_FAT	GO:0032313~regulation of Rab GTPase activity	7	0.339806	0.233783	ILMN_1228165, ILMN_1218901, ILMN_2620053, ILMN_2987294, ILMN_1217144, ILMN_2722583, ILMN_1251220	1454	39	13588	1.67735	1	0.932713	99.2053
GOTERM_BP_FAT	GO:0032483~regulation of Rab protein signal transduction	7	0.339806	0.233783	ILMN_1228165, ILMN_1218901, ILMN_2620053, ILMN_2987294, ILMN_1217144, ILMN_2722583, ILMN_1251220	1454	39	13588	1.67735	1	0.932713	99.2053
UP_SEQ_FEATURE	domain:Rab-GAP TBC	6	0.291262	0.368314	ILMN_1228165, ILMN_1218901, ILMN_2987294, ILMN_1217144, ILMN_2722583, ILMN_1251220	1937	33	16021	1.50383	1	1	99.9805
SMART	SM00164:TBC	6	0.291262	0.369058	ILMN_1228165, ILMN_1218901, ILMN_2987294, ILMN_1217144, ILMN_2722583, ILMN_1251220	960	38	9131	1.50181	1	0.932918	99.8171
INTERPRO	IPR000195:RabGAP/TBC	6	0.291262	0.373243	ILMN_1228165, ILMN_1218901, ILMN_2987294, ILMN_1217144, ILMN_2722583, ILMN_1251220	1876	38	17763	1.49503	1	0.999616	99.9724
Annotation Cluster 99	Enrichment Score: 0.9283035135826141
Category	Term	Count	%	PValue	Genes	List Total	Pop Hits	Pop Total	Fold Enrichment	Bonferroni	Benjamini	FDR
GOTERM_CC_FAT	GO:0000118~histone deacetylase complex	9	0.436893	0.0137229	ILMN_2733514, ILMN_1213290, ILMN_1219275, ILMN_1219978, ILMN_2768755, ILMN_2730498, ILMN_3055904, ILMN_2691187, ILMN_2659160, ILMN_2614912, ILMN_2691192, ILMN_1225235	1289	32	12504	2.72828	0.999293	0.12357	18.1554
UP_SEQ_FEATURE	region of interest:Histone deacetylase	4	0.194175	0.0846279	ILMN_2733514, ILMN_1213290, ILMN_2768755, ILMN_2659160, ILMN_2614912	1937	9	16021	3.67602	1	0.998477	80.6945
INTERPRO	IPR000286:Histone deacetylase superfamily	4	0.194175	0.101702	ILMN_2733514, ILMN_1213290, ILMN_2768755, ILMN_2659160, ILMN_2614912	1876	11	17763	3.44311	1	0.972296	84.7551
GOTERM_MF_FAT	GO:0019213~deacetylase activity	5	0.242718	0.128477	ILMN_2733514, ILMN_1213290, ILMN_2768755, ILMN_2605556, ILMN_2659160, ILMN_2614912	1385	19	13288	2.5248	1	0.76892	88.8413
GOTERM_MF_FAT	GO:0004407~histone deacetylase activity	4	0.194175	0.228614	ILMN_2733514, ILMN_1213290, ILMN_2768755, ILMN_2659160, ILMN_2614912	1385	16	13288	2.39856	1	0.904344	98.4067
GOTERM_MF_FAT	GO:0033558~protein deacetylase activity	4	0.194175	0.228614	ILMN_2733514, ILMN_1213290, ILMN_2768755, ILMN_2659160, ILMN_2614912	1385	16	13288	2.39856	1	0.904344	98.4067
GOTERM_MF_FAT	GO:0016811~hydrolase activity, acting on carbon-nitrogen (but not peptide) bonds, in linear amides	8	0.38835	0.40046	ILMN_2733514, ILMN_1213290, ILMN_2768755, ILMN_2888742, ILMN_2980044, ILMN_1247261, ILMN_2605556, ILMN_2659160, ILMN_2614912	1385	58	13288	1.32334	1	0.973258	99.9714
Annotation Cluster 100	Enrichment Score: 0.9219615300060855
Category	Term	Count	%	PValue	Genes	List Total	Pop Hits	Pop Total	Fold Enrichment	Bonferroni	Benjamini	FDR
SMART	SM00651:Sm	5	0.242718	0.112577	ILMN_2741726, ILMN_2975640, ILMN_2748091, ILMN_1251056, ILMN_2971946	960	18	9131	2.64207	1	0.813929	80.5019
INTERPRO	IPR006649:Like-Sm ribonucleoprotein, eukaryotic and archaea-type, core	5	0.242718	0.114268	ILMN_2741726, ILMN_2975640, ILMN_2748091, ILMN_1251056, ILMN_2971946	1876	18	17763	2.63015	1	0.976272	88.0924
INTERPRO	IPR001163:Like-Sm ribonucleoprotein, core	5	0.242718	0.133272	ILMN_2741726, ILMN_2975640, ILMN_2748091, ILMN_1251056, ILMN_2971946	1876	19	17763	2.49172	1	0.982443	91.8599
Annotation Cluster 101	Enrichment Score: 0.9099275143335863
Category	Term	Count	%	PValue	Genes	List Total	Pop Hits	Pop Total	Fold Enrichment	Bonferroni	Benjamini	FDR
GOTERM_BP_FAT	GO:0030031~cell projection assembly	13	0.631068	0.0664245	ILMN_2742675, ILMN_2618714, ILMN_2946862, ILMN_2861469, ILMN_2721221, ILMN_2659616, ILMN_3123303, ILMN_2829646, ILMN_2621148, ILMN_1246701, ILMN_2794796, ILMN_2890574, ILMN_1220165	1454	70	13588	1.73555	1	0.667154	71.2914
GOTERM_BP_FAT	GO:0060271~cilium morphogenesis	6	0.291262	0.137997	ILMN_2829646, ILMN_2621148, ILMN_1246701, ILMN_2794796, ILMN_2845744, ILMN_2721221	1454	26	13588	2.1566	1	0.841092	93.254
GOTERM_BP_FAT	GO:0042384~cilium assembly	5	0.242718	0.203244	ILMN_2829646, ILMN_2621148, ILMN_1246701, ILMN_2794796, ILMN_2721221	1454	22	13588	2.12392	1	0.912874	98.3842
Annotation Cluster 102	Enrichment Score: 0.9083904757017386
Category	Term	Count	%	PValue	Genes	List Total	Pop Hits	Pop Total	Fold Enrichment	Bonferroni	Benjamini	FDR
GOTERM_BP_FAT	GO:0034330~cell junction organization	8	0.38835	0.0487142	ILMN_2727687, ILMN_2974798, ILMN_3123303, ILMN_2768755, ILMN_2780205, ILMN_2849449, ILMN_2727692, ILMN_2878726, ILMN_2678576, ILMN_2946862, ILMN_2605941	1454	32	13588	2.33631	1	0.604625	59.6169
GOTERM_BP_FAT	GO:0034329~cell junction assembly	6	0.291262	0.0660864	ILMN_2974798, ILMN_3123303, ILMN_2768755, ILMN_2780205, ILMN_2849449, ILMN_2605941	1454	21	13588	2.67007	1	0.667037	71.102
GOTERM_BP_FAT	GO:0045216~cell-cell junction organization	5	0.242718	0.118429	ILMN_2727687, ILMN_2768755, ILMN_2780205, ILMN_2727692, ILMN_2878726, ILMN_2678576, ILMN_2946862, ILMN_2605941	1454	18	13588	2.5959	1	0.811783	89.8597
GOTERM_BP_FAT	GO:0007043~cell-cell junction assembly	3	0.145631	0.167107	ILMN_2768755, ILMN_2780205, ILMN_2605941	1454	7	13588	4.00511	1	0.877089	96.3846
GOTERM_BP_FAT	GO:0007044~cell-substrate junction assembly	3	0.145631	0.450638	ILMN_2974798, ILMN_3123303, ILMN_2849449	1454	14	13588	2.00255	1	0.989837	99.9981
Annotation Cluster 103	Enrichment Score: 0.9079142598979039
Category	Term	Count	%	PValue	Genes	List Total	Pop Hits	Pop Total	Fold Enrichment	Bonferroni	Benjamini	FDR
SP_PIR_KEYWORDS	FAD	20	0.970874	0.0265383	ILMN_2657694, ILMN_1236459, ILMN_1219169, ILMN_1217875, ILMN_2808191, ILMN_2826816, ILMN_2472504, ILMN_2968731, ILMN_2729153, ILMN_2832884, ILMN_2760514, ILMN_2904686, ILMN_2984012, ILMN_1219942, ILMN_1254444, ILMN_2949844, ILMN_2944765, ILMN_2453086, ILMN_2649966, ILMN_2968729, ILMN_2795698, ILMN_2689581, ILMN_2633942, ILMN_2898403, ILMN_1244848	1951	109	17854	1.67912	0.999999	0.181532	32.1055
SP_PIR_KEYWORDS	Flavoprotein	18	0.873786	0.0540866	ILMN_1219942, ILMN_2657694, ILMN_1219169, ILMN_1236459, ILMN_1254444, ILMN_2808191, ILMN_1217875, ILMN_2826816, ILMN_2949844, ILMN_2968731, ILMN_2944765, ILMN_2453086, ILMN_2968729, ILMN_2649966, ILMN_2795698, ILMN_2689581, ILMN_2832884, ILMN_2633942, ILMN_2898403, ILMN_2760514, ILMN_2904686, ILMN_1244848, ILMN_2984012	1951	103	17854	1.59924	1	0.3198	55.0896
UP_SEQ_FEATURE	nucleotide phosphate-binding region:FAD	10	0.485437	0.262996	ILMN_1219942, ILMN_2808191, ILMN_1217875, ILMN_2826816, ILMN_2689581, ILMN_2968731, ILMN_2729153, ILMN_2453086, ILMN_2649966, ILMN_2968729, ILMN_2904686, ILMN_2984012	1937	58	16021	1.42604	1	0.999998	99.6574
GOTERM_MF_FAT	GO:0050660~FAD binding	8	0.38835	0.618631	ILMN_1254444, ILMN_2949844, ILMN_2944765, ILMN_2729153, ILMN_2898403, ILMN_2760514, ILMN_2453086, ILMN_2649966, ILMN_1244848	1385	71	13288	1.08104	1	0.99562	100
Annotation Cluster 104	Enrichment Score: 0.8949669452571068
Category	Term	Count	%	PValue	Genes	List Total	Pop Hits	Pop Total	Fold Enrichment	Bonferroni	Benjamini	FDR
GOTERM_CC_FAT	GO:0031080~Nup107-160 complex	4	0.194175	0.0410867	ILMN_2890574, ILMN_3024099, ILMN_1250574, ILMN_2654013	1289	8	12504	4.85027	1	0.269963	45.5729
GOTERM_CC_FAT	GO:0000775~chromosome, centromeric region	18	0.873786	0.0618017	ILMN_2610835, ILMN_2732689, ILMN_2854962, ILMN_1237761, ILMN_3055904, ILMN_2655204, ILMN_2440789, ILMN_3024099, ILMN_1260420, ILMN_1220943, ILMN_2711410, ILMN_1252310, ILMN_1215305, ILMN_2996601, ILMN_2883414, ILMN_2890574, ILMN_1243875, ILMN_2690077, ILMN_1250574, ILMN_2654013	1289	111	12504	1.57306	1	0.338655	60.3452
GOTERM_CC_FAT	GO:0000793~condensed chromosome	17	0.825243	0.0812945	ILMN_2717613, ILMN_2667889, ILMN_2854962, ILMN_1232386, ILMN_3024099, ILMN_1260420, ILMN_1220943, ILMN_2711410, ILMN_2996601, ILMN_2432458, ILMN_2770759, ILMN_2971204, ILMN_2890574, ILMN_2420070, ILMN_2845214, ILMN_1243875, ILMN_2690077, ILMN_1250574, ILMN_2654013	1289	107	12504	1.54121	1	0.386865	70.7526
GOTERM_CC_FAT	GO:0000776~kinetochore	11	0.533981	0.100777	ILMN_2711410, ILMN_1220943, ILMN_2610835, ILMN_1215305, ILMN_2732689, ILMN_3055904, ILMN_2655204, ILMN_2890574, ILMN_3024099, ILMN_2690077, ILMN_1250574, ILMN_2654013	1289	62	12504	1.72106	1	0.447485	78.5655
GOTERM_CC_FAT	GO:0000779~condensed chromosome, centromeric region	10	0.485437	0.160326	ILMN_2711410, ILMN_1220943, ILMN_2996601, ILMN_2854962, ILMN_2890574, ILMN_1243875, ILMN_3024099, ILMN_1260420, ILMN_2690077, ILMN_1250574, ILMN_2654013	1289	60	12504	1.61676	1	0.562413	92.0628
SP_PIR_KEYWORDS	kinetochore	9	0.436893	0.347856	ILMN_2711410, ILMN_1220943, ILMN_2854962, ILMN_2890574, ILMN_2655944, ILMN_3024099, ILMN_2690077, ILMN_1250574, ILMN_2654013	1951	61	17854	1.35018	1	0.816032	99.7876
GOTERM_CC_FAT	GO:0000777~condensed chromosome kinetochore	7	0.339806	0.468494	ILMN_2711410, ILMN_1220943, ILMN_2890574, ILMN_3024099, ILMN_2690077, ILMN_1250574, ILMN_2654013	1289	53	12504	1.2812	1	0.88406	99.9895
Annotation Cluster 105	Enrichment Score: 0.8912955827777292
Category	Term	Count	%	PValue	Genes	List Total	Pop Hits	Pop Total	Fold Enrichment	Bonferroni	Benjamini	FDR
INTERPRO	IPR018359:Bromodomain, conserved site	8	0.38835	0.0459534	ILMN_2913089, ILMN_1215305, ILMN_3154810, ILMN_1252496, ILMN_2834573, ILMN_1227225, ILMN_2652749, ILMN_3154409, ILMN_2751505, ILMN_2601877, ILMN_2421220, ILMN_2633333	1876	32	17763	2.36714	1	0.892857	56.1766
SP_PIR_KEYWORDS	bromodomain	8	0.38835	0.070999	ILMN_2913089, ILMN_1215305, ILMN_3154810, ILMN_1252496, ILMN_2834573, ILMN_1227225, ILMN_2652749, ILMN_3154409, ILMN_2751505, ILMN_2601877, ILMN_2421220, ILMN_2633333	1951	34	17854	2.15322	1	0.379519	65.3623
SMART	SM00297:BROMO	8	0.38835	0.108697	ILMN_2913089, ILMN_1215305, ILMN_3154810, ILMN_1252496, ILMN_2834573, ILMN_1227225, ILMN_2652749, ILMN_3154409, ILMN_2751505, ILMN_2601877, ILMN_2421220, ILMN_2633333	960	39	9131	1.95107	1	0.815056	79.3019
INTERPRO	IPR001487:Bromodomain	8	0.38835	0.111128	ILMN_2913089, ILMN_1215305, ILMN_3154810, ILMN_1252496, ILMN_2834573, ILMN_1227225, ILMN_2652749, ILMN_3154409, ILMN_2751505, ILMN_2601877, ILMN_2421220, ILMN_2633333	1876	39	17763	1.94227	1	0.974771	87.33
UP_SEQ_FEATURE	domain:Bromo	5	0.242718	0.164681	ILMN_2913089, ILMN_1215305, ILMN_3154810, ILMN_1227225, ILMN_2652749	1937	18	16021	2.29751	1	0.999952	96.4813
UP_SEQ_FEATURE	domain:Bromo 1	3	0.145631	0.298084	ILMN_1252496, ILMN_2834573, ILMN_3154409, ILMN_2751505, ILMN_2601877, ILMN_2421220, ILMN_2633333	1937	9	16021	2.75701	1	0.999999	99.8617
UP_SEQ_FEATURE	domain:Bromo 2	3	0.145631	0.298084	ILMN_1252496, ILMN_2834573, ILMN_3154409, ILMN_2751505, ILMN_2601877, ILMN_2421220, ILMN_2633333	1937	9	16021	2.75701	1	0.999999	99.8617
Annotation Cluster 106	Enrichment Score: 0.8884631980320998
Category	Term	Count	%	PValue	Genes	List Total	Pop Hits	Pop Total	Fold Enrichment	Bonferroni	Benjamini	FDR
GOTERM_MF_FAT	GO:0017137~Rab GTPase binding	6	0.291262	0.0408853	ILMN_2635232, ILMN_3127335, ILMN_1219978, ILMN_1240592, ILMN_3107607, ILMN_2620053, ILMN_2987294	1385	19	13288	3.02975	1	0.526981	48.6091
GOTERM_MF_FAT	GO:0031267~small GTPase binding	11	0.533981	0.0821887	ILMN_2635232, ILMN_2972459, ILMN_3127335, ILMN_2695718, ILMN_1219978, ILMN_1240592, ILMN_3107607, ILMN_2620053, ILMN_3104857, ILMN_2987294, ILMN_1251572, ILMN_2861469	1385	59	13288	1.78875	1	0.684475	74.5304
GOTERM_MF_FAT	GO:0051020~GTPase binding	11	0.533981	0.106549	ILMN_2635232, ILMN_2972459, ILMN_3127335, ILMN_2695718, ILMN_1219978, ILMN_1240592, ILMN_3107607, ILMN_2620053, ILMN_3104857, ILMN_2987294, ILMN_1251572, ILMN_2861469	1385	62	13288	1.7022	1	0.743875	83.4149
GOTERM_MF_FAT	GO:0017016~Ras GTPase binding	10	0.485437	0.134117	ILMN_2635232, ILMN_2972459, ILMN_3127335, ILMN_1219978, ILMN_1240592, ILMN_3107607, ILMN_2620053, ILMN_3104857, ILMN_2987294, ILMN_1251572, ILMN_2861469	1385	57	13288	1.6832	1	0.781094	89.9388
GOTERM_MF_FAT	GO:0019899~enzyme binding	29	1.40777	0.209907	ILMN_2706730, ILMN_1222803, ILMN_2851889, ILMN_1219978, ILMN_2513849, ILMN_2851888, ILMN_1240592, ILMN_3107607, ILMN_2718815, ILMN_2620053, ILMN_2506144, ILMN_3127335, ILMN_2956895, ILMN_3125181, ILMN_2635232, ILMN_2741726, ILMN_3052632, ILMN_2852034, ILMN_2811240, ILMN_2894751, ILMN_2861469, ILMN_2972459, ILMN_2695718, ILMN_2642313, ILMN_2679619, ILMN_2479786, ILMN_3104857, ILMN_1251572, ILMN_29…	1385	229	13288	1.21499	1	0.885451	97.6652
GOTERM_MF_FAT	GO:0017048~Rho GTPase binding	4	0.194175	0.463216	ILMN_2972459, ILMN_2620053, ILMN_3104857, ILMN_2861469	1385	24	13288	1.59904	1	0.982275	99.9951
Annotation Cluster 107	Enrichment Score: 0.8883612173521296
Category	Term	Count	%	PValue	Genes	List Total	Pop Hits	Pop Total	Fold Enrichment	Bonferroni	Benjamini	FDR
GOTERM_BP_FAT	GO:0048635~negative regulation of muscle development	5	0.242718	0.0232031	ILMN_1215252, ILMN_1213290, ILMN_2768755, ILMN_2703748, ILMN_2659160, ILMN_2851288	1454	11	13588	4.24784	1	0.432444	34.7052
GOTERM_BP_FAT	GO:0045843~negative regulation of striated muscle development	4	0.194175	0.0825563	ILMN_1215252, ILMN_1213290, ILMN_2768755, ILMN_2703748, ILMN_2659160	1454	10	13588	3.7381	1	0.721361	79.0798
GOTERM_BP_FAT	GO:0048634~regulation of muscle development	7	0.339806	0.309534	ILMN_1215252, ILMN_1213290, ILMN_2938893, ILMN_2768755, ILMN_2703748, ILMN_2609887, ILMN_2659160, ILMN_2851288	1454	43	13588	1.52132	1	0.963072	99.88
GOTERM_BP_FAT	GO:0016202~regulation of striated muscle tissue development	6	0.291262	0.471575	ILMN_1215252, ILMN_1213290, ILMN_2938893, ILMN_2768755, ILMN_2703748, ILMN_2609887, ILMN_2659160	1454	42	13588	1.33504	1	0.991456	99.9991
Annotation Cluster 108	Enrichment Score: 0.8879100352892335
Category	Term	Count	%	PValue	Genes	List Total	Pop Hits	Pop Total	Fold Enrichment	Bonferroni	Benjamini	FDR
PIR_SUPERFAMILY	PIRSF001569:E3 ubiquitin-protein ligase, Nedd4/Rsp5p types	4	0.194175	0.0150896	ILMN_3163529, ILMN_2878501, ILMN_3005669, ILMN_2594344	801	6	8136	6.77154	0.999999	0.999054	21.1435
UP_SEQ_FEATURE	domain:WW 3	4	0.194175	0.0618219	ILMN_3163529, ILMN_2878501, ILMN_3005669, ILMN_2594344	1937	8	16021	4.13552	1	0.997825	69.4873
UP_SEQ_FEATURE	domain:HECT	6	0.291262	0.100486	ILMN_2661005, ILMN_2717727, ILMN_3163529, ILMN_2878501, ILMN_3005669, ILMN_2594344	1937	21	16021	2.36315	1	0.999193	86.0522
SMART	SM00119:HECTc	6	0.291262	0.147006	ILMN_2661005, ILMN_2717727, ILMN_3163529, ILMN_2878501, ILMN_3005669, ILMN_2594344	960	27	9131	2.11366	1	0.864515	88.6561
INTERPRO	IPR000569:HECT	6	0.291262	0.149425	ILMN_2661005, ILMN_2717727, ILMN_3163529, ILMN_2878501, ILMN_3005669, ILMN_2594344	1876	27	17763	2.10412	1	0.98792	94.1473
UP_SEQ_FEATURE	domain:WW 2	6	0.291262	0.244754	ILMN_1248293, ILMN_2810331, ILMN_3163529, ILMN_2878501, ILMN_3005669, ILMN_2594344	1937	28	16021	1.77237	1	0.999996	99.4601
UP_SEQ_FEATURE	domain:WW 1	6	0.291262	0.244754	ILMN_1248293, ILMN_2810331, ILMN_3163529, ILMN_2878501, ILMN_3005669, ILMN_2594344	1937	28	16021	1.77237	1	0.999996	99.4601
SMART	SM00456:WW	8	0.38835	0.285365	ILMN_2788475, ILMN_1248293, ILMN_2651534, ILMN_2810331, ILMN_3163529, ILMN_2878501, ILMN_1214110, ILMN_3005669, ILMN_2594344	960	51	9131	1.49199	1	0.897136	98.9939
INTERPRO	IPR001202:WW/Rsp5/WWP	8	0.38835	0.289911	ILMN_2788475, ILMN_1248293, ILMN_2651534, ILMN_2810331, ILMN_3163529, ILMN_2878501, ILMN_1214110, ILMN_3005669, ILMN_2594344	1876	51	17763	1.48526	1	0.998338	99.7532
Annotation Cluster 109	Enrichment Score: 0.8822543151361653
Category	Term	Count	%	PValue	Genes	List Total	Pop Hits	Pop Total	Fold Enrichment	Bonferroni	Benjamini	FDR
GOTERM_BP_FAT	GO:0000075~cell cycle checkpoint	12	0.582524	0.0197408	ILMN_2610835, ILMN_2933993, ILMN_2466845, ILMN_1230273, ILMN_2732689, ILMN_1245874, ILMN_2655204, ILMN_2907878, ILMN_3074516, ILMN_2669087, ILMN_2711570, ILMN_2893077, ILMN_1221616, ILMN_2837156, ILMN_2743723	1454	52	13588	2.1566	1	0.390947	30.3727
GOTERM_BP_FAT	GO:0042770~DNA damage response, signal transduction	11	0.533981	0.0783406	ILMN_2749717, ILMN_2610835, ILMN_2933993, ILMN_2466845, ILMN_1230273, ILMN_2732689, ILMN_2705324, ILMN_2690620, ILMN_1245874, ILMN_2652575, ILMN_2839973, ILMN_2652572, ILMN_2907878, ILMN_2743723	1454	57	13588	1.80347	1	0.708426	77.2639
GOTERM_BP_FAT	GO:0000077~DNA damage checkpoint	5	0.242718	0.401751	ILMN_2466845, ILMN_2933993, ILMN_1230273, ILMN_1245874, ILMN_2907878, ILMN_2743723	1454	30	13588	1.55754	1	0.983779	99.9911
GOTERM_BP_FAT	GO:0031570~DNA integrity checkpoint	5	0.242718	0.476073	ILMN_2466845, ILMN_2933993, ILMN_1230273, ILMN_1245874, ILMN_2907878, ILMN_2743723	1454	33	13588	1.41595	1	0.991895	99.9992
Annotation Cluster 110	Enrichment Score: 0.8720831128038619
Category	Term	Count	%	PValue	Genes	List Total	Pop Hits	Pop Total	Fold Enrichment	Bonferroni	Benjamini	FDR
GOTERM_BP_FAT	GO:0045017~glycerolipid biosynthetic process	12	0.582524	0.0413695	ILMN_3099242, ILMN_2739295, ILMN_2877507, ILMN_1255634, ILMN_2807284, ILMN_1255423, ILMN_2740372, ILMN_1218263, ILMN_1236683, ILMN_3120797, ILMN_2605941, ILMN_2609495	1454	58	13588	1.9335	1	0.565206	53.5648
GOTERM_BP_FAT	GO:0006650~glycerophospholipid metabolic process	16	0.776699	0.0456329	ILMN_2877507, ILMN_2739295, ILMN_2609412, ILMN_1231996, ILMN_1255634, ILMN_2689259, ILMN_1255423, ILMN_2609495, ILMN_3099242, ILMN_2978525, ILMN_2695047, ILMN_2602406, ILMN_1218263, ILMN_2740372, ILMN_1236683, ILMN_3120797	1454	88	13588	1.69914	1	0.586484	57.1748
GOTERM_BP_FAT	GO:0046474~glycerophospholipid biosynthetic process	10	0.485437	0.0519469	ILMN_3099242, ILMN_2739295, ILMN_2877507, ILMN_1255634, ILMN_1255423, ILMN_2740372, ILMN_1218263, ILMN_1236683, ILMN_3120797, ILMN_2609495	1454	46	13588	2.03158	1	0.616391	62.0373
GOTERM_BP_FAT	GO:0042158~lipoprotein biosynthetic process	11	0.533981	0.0642592	ILMN_1246724, ILMN_1214054, ILMN_1216042, ILMN_2877507, ILMN_2822229, ILMN_1255634, ILMN_1255423, ILMN_2740372, ILMN_3120797, ILMN_2609495, ILMN_2667100	1454	55	13588	1.86905	1	0.663776	70.0581
GOTERM_BP_FAT	GO:0006644~phospholipid metabolic process	25	1.21359	0.0654889	ILMN_2739295, ILMN_1231996, ILMN_2939303, ILMN_2625342, ILMN_1255423, ILMN_2609495, ILMN_2978525, ILMN_2728521, ILMN_2695047, ILMN_1218263, ILMN_3120797, ILMN_2877507, ILMN_2609412, ILMN_1255634, ILMN_2980858, ILMN_2689259, ILMN_3099242, ILMN_2637953, ILMN_2602406, ILMN_2655954, ILMN_2740372, ILMN_1236683, ILMN_2618526, ILMN_2877165, ILMN_1217077	1454	163	13588	1.43332	1	0.665422	70.7645
GOTERM_BP_FAT	GO:0006497~protein amino acid lipidation	10	0.485437	0.080812	ILMN_1246724, ILMN_1214054, ILMN_2877507, ILMN_2822229, ILMN_1255634, ILMN_1255423, ILMN_2740372, ILMN_3120797, ILMN_2609495, ILMN_2667100	1454	50	13588	1.86905	1	0.718354	78.3457
GOTERM_BP_FAT	GO:0008654~phospholipid biosynthetic process	14	0.679612	0.102274	ILMN_2877507, ILMN_2739295, ILMN_2939303, ILMN_1255634, ILMN_2980858, ILMN_2625342, ILMN_1255423, ILMN_2609495, ILMN_3099242, ILMN_2655954, ILMN_2740372, ILMN_1218263, ILMN_1236683, ILMN_3120797	1454	83	13588	1.57631	1	0.779091	85.8992
GOTERM_BP_FAT	GO:0019637~organophosphate metabolic process	25	1.21359	0.12683	ILMN_2739295, ILMN_1231996, ILMN_2939303, ILMN_2625342, ILMN_1255423, ILMN_2609495, ILMN_2978525, ILMN_2728521, ILMN_2695047, ILMN_1218263, ILMN_3120797, ILMN_2877507, ILMN_2609412, ILMN_1255634, ILMN_2980858, ILMN_2689259, ILMN_3099242, ILMN_2637953, ILMN_2602406, ILMN_2655954, ILMN_2740372, ILMN_1236683, ILMN_2618526, ILMN_2877165, ILMN_1217077	1454	176	13588	1.32745	1	0.826904	91.4779
GOTERM_BP_FAT	GO:0046486~glycerolipid metabolic process	19	0.92233	0.144855	ILMN_2877507, ILMN_2739295, ILMN_2609412, ILMN_1231996, ILMN_1255634, ILMN_2807284, ILMN_2689259, ILMN_1245874, ILMN_1255423, ILMN_2605941, ILMN_2609495, ILMN_3099242, ILMN_2978525, ILMN_2695047, ILMN_2602406, ILMN_1218263, ILMN_2740372, ILMN_1236683, ILMN_2743723, ILMN_3120797	1454	129	13588	1.37643	1	0.849652	94.1646
GOTERM_BP_FAT	GO:0042157~lipoprotein metabolic process	12	0.582524	0.185159	ILMN_1246724, ILMN_1214054, ILMN_1216042, ILMN_2877507, ILMN_2822229, ILMN_1255634, ILMN_1255423, ILMN_2740372, ILMN_1221255, ILMN_3120797, ILMN_2609495, ILMN_2667100	1454	76	13588	1.47557	1	0.895584	97.5713
GOTERM_BP_FAT	GO:0006506~GPI anchor biosynthetic process	6	0.291262	0.212194	ILMN_2877507, ILMN_1255634, ILMN_1255423, ILMN_2740372, ILMN_3120797, ILMN_2609495	1454	30	13588	1.86905	1	0.918202	98.6838
GOTERM_BP_FAT	GO:0030384~phosphoinositide metabolic process	10	0.485437	0.227593	ILMN_2877507, ILMN_1231996, ILMN_2609412, ILMN_1255634, ILMN_2602406, ILMN_2689259, ILMN_1255423, ILMN_2740372, ILMN_3120797, ILMN_2609495	1454	63	13588	1.48337	1	0.929383	99.0803
GOTERM_BP_FAT	GO:0046489~phosphoinositide biosynthetic process	6	0.291262	0.232452	ILMN_2877507, ILMN_1255634, ILMN_1255423, ILMN_2740372, ILMN_3120797, ILMN_2609495	1454	31	13588	1.80876	1	0.933241	99.1799
GOTERM_BP_FAT	GO:0006505~GPI anchor metabolic process	6	0.291262	0.253228	ILMN_2877507, ILMN_1255634, ILMN_1255423, ILMN_2740372, ILMN_3120797, ILMN_2609495	1454	32	13588	1.75224	1	0.941775	99.5017
SP_PIR_KEYWORDS	gpi-anchor biosynthesis	5	0.242718	0.263356	ILMN_2877507, ILMN_1255634, ILMN_1255423, ILMN_2740372, ILMN_3120797	1951	24	17854	1.9065	1	0.756398	98.7726
KEGG_PATHWAY	mmu00563:Glycosylphosphatidylinositol(GPI)-anchor biosynthesis	5	0.242718	0.304225	ILMN_2877507, ILMN_1255634, ILMN_1255423, ILMN_2740372, ILMN_3120797	643	25	5738	1.78476	1	0.607703	98.8433
GOTERM_BP_FAT	GO:0008610~lipid biosynthetic process	31	1.50485	0.565651	ILMN_3131666, ILMN_1226978, ILMN_2739295, ILMN_2939303, ILMN_2625342, ILMN_2807284, ILMN_1240770, ILMN_1255423, ILMN_2796651, ILMN_2838372, ILMN_2609495, ILMN_2605941, ILMN_2994779, ILMN_1238081, ILMN_1218263, ILMN_2760514, ILMN_2934534, ILMN_3120797, ILMN_1224780, ILMN_2904686, ILMN_2739517, ILMN_3143506, ILMN_2723491, ILMN_2625699, ILMN_2877507, ILMN_1255634, ILMN_2980858, ILMN_2606579, ILMN_29…	1454	285	13588	1.0165	1	0.996102	100
Annotation Cluster 111	Enrichment Score: 0.856585724857499
Category	Term	Count	%	PValue	Genes	List Total	Pop Hits	Pop Total	Fold Enrichment	Bonferroni	Benjamini	FDR
GOTERM_BP_FAT	GO:0060442~branching involved in prostate gland morphogenesis	6	0.291262	0.00856217	ILMN_1215252, ILMN_1225565, ILMN_2609887, ILMN_1230162, ILMN_2993711, ILMN_3114585	1454	13	13588	4.31319	1	0.244832	14.4552
GOTERM_BP_FAT	GO:0030850~prostate gland development	9	0.436893	0.0510387	ILMN_1215252, ILMN_1257428, ILMN_2820260, ILMN_1225565, ILMN_2609887, ILMN_2976191, ILMN_1230162, ILMN_2993711, ILMN_3114585	1454	39	13588	2.1566	1	0.613841	61.3715
GOTERM_BP_FAT	GO:0060740~prostate gland epithelium morphogenesis	7	0.339806	0.0524718	ILMN_1215252, ILMN_1225565, ILMN_2609887, ILMN_2976191, ILMN_1230162, ILMN_2993711, ILMN_3114585	1454	26	13588	2.51603	1	0.614112	62.4171
GOTERM_BP_FAT	GO:0060512~prostate gland morphogenesis	7	0.339806	0.0616033	ILMN_1215252, ILMN_1225565, ILMN_2609887, ILMN_2976191, ILMN_1230162, ILMN_2993711, ILMN_3114585	1454	27	13588	2.42284	1	0.653405	68.4769
GOTERM_BP_FAT	GO:0060525~prostate glandular acinus development	4	0.194175	0.129112	ILMN_2820260, ILMN_1225565, ILMN_2609887, ILMN_2993711	1454	12	13588	3.11508	1	0.827885	91.8733
GOTERM_BP_FAT	GO:0048608~reproductive structure development	19	0.92233	0.15232	ILMN_1257428, ILMN_1215252, ILMN_2511913, ILMN_2762301, ILMN_2715215, ILMN_2820260, ILMN_2449335, ILMN_2609887, ILMN_2930707, ILMN_3121255, ILMN_2496682, ILMN_3114585, ILMN_2636443, ILMN_2761082, ILMN_1225565, ILMN_2976191, ILMN_2729153, ILMN_1230162, ILMN_2993711	1454	130	13588	1.36584	1	0.858717	95.0234
GOTERM_BP_FAT	GO:0060742~epithelial cell differentiation involved in prostate gland development	4	0.194175	0.155156	ILMN_2820260, ILMN_2609887, ILMN_2976191, ILMN_1230162	1454	13	13588	2.87546	1	0.862228	95.3172
GOTERM_BP_FAT	GO:0060526~prostate glandular acinus morphogenesis	3	0.145631	0.167107	ILMN_1225565, ILMN_2609887, ILMN_2993711	1454	7	13588	4.00511	1	0.877089	96.3846
GOTERM_BP_FAT	GO:0060527~prostate epithelial cord arborization involved in prostate glandular acinus morphogenesis	3	0.145631	0.167107	ILMN_1225565, ILMN_2609887, ILMN_2993711	1454	7	13588	4.00511	1	0.877089	96.3846
GOTERM_BP_FAT	GO:0001655~urogenital system development	19	0.92233	0.29676	ILMN_1257428, ILMN_1215252, ILMN_2511913, ILMN_2936380, ILMN_2820260, ILMN_2886828, ILMN_2814005, ILMN_1249360, ILMN_2609887, ILMN_2655204, ILMN_2930707, ILMN_3114585, ILMN_2736999, ILMN_2761082, ILMN_2621148, ILMN_1225565, ILMN_2976191, ILMN_1245609, ILMN_2842137, ILMN_1230162, ILMN_2993711	1454	146	13588	1.21616	1	0.959123	99.8325
GOTERM_BP_FAT	GO:0001763~morphogenesis of a branching structure	15	0.728155	0.469545	ILMN_1215252, ILMN_2511913, ILMN_2609887, ILMN_2618714, ILMN_2945275, ILMN_2930707, ILMN_3121255, ILMN_3114585, ILMN_2736999, ILMN_3123303, ILMN_1225565, ILMN_1245731, ILMN_2842137, ILMN_1230162, ILMN_3100042, ILMN_2993711	1454	125	13588	1.12143	1	0.991304	99.999
GOTERM_BP_FAT	GO:0022612~gland morphogenesis	10	0.485437	0.549786	ILMN_1215252, ILMN_2511913, ILMN_2618714, ILMN_1225565, ILMN_2609887, ILMN_2976191, ILMN_1230162, ILMN_3100042, ILMN_2993711, ILMN_3114585	1454	84	13588	1.11253	1	0.995574	99.9999
GOTERM_BP_FAT	GO:0048732~gland development	19	0.92233	0.793625	ILMN_1257428, ILMN_1215252, ILMN_2511913, ILMN_2820260, ILMN_2828877, ILMN_2609887, ILMN_2618714, ILMN_1221067, ILMN_3121255, ILMN_3114585, ILMN_2938893, ILMN_1225565, ILMN_2653312, ILMN_2976191, ILMN_1216279, ILMN_2695883, ILMN_1245731, ILMN_1230162, ILMN_3100042, ILMN_2993711	1454	197	13588	0.901319	1	0.999829	100
Annotation Cluster 112	Enrichment Score: 0.8547145692313236
Category	Term	Count	%	PValue	Genes	List Total	Pop Hits	Pop Total	Fold Enrichment	Bonferroni	Benjamini	FDR
GOTERM_CC_FAT	GO:0015630~microtubule cytoskeleton	62	3.00971	0.0150111	ILMN_2828492, ILMN_2742626, ILMN_3034877, ILMN_2825020, ILMN_2914510, ILMN_2666669, ILMN_2620053, ILMN_2847332, ILMN_3161897, ILMN_1215681, ILMN_1239133, ILMN_2620304, ILMN_2648709, ILMN_2830983, ILMN_2829646, ILMN_3085841, ILMN_3161327, ILMN_2420070, ILMN_2995290, ILMN_2742675, ILMN_2695158, ILMN_3150536, ILMN_2667889, ILMN_2588051, ILMN_2735625, ILMN_2865939, ILMN_3125920, ILMN_2732536, ILMN_26…	1289	450	12504	1.33652	0.999644	0.130041	19.6919
GOTERM_CC_FAT	GO:0005874~microtubule	34	1.65049	0.0519152	ILMN_2686183, ILMN_3034877, ILMN_2825020, ILMN_2914510, ILMN_2593410, ILMN_2632839, ILMN_2655204, ILMN_2856861, ILMN_2847332, ILMN_1218761, ILMN_3161897, ILMN_1253677, ILMN_2517170, ILMN_1239133, ILMN_2830983, ILMN_3085841, ILMN_2420070, ILMN_2439130, ILMN_2995290, ILMN_2983228, ILMN_2664972, ILMN_3071764, ILMN_2690077, ILMN_2859659, ILMN_2464061, ILMN_3150536, ILMN_2588051, ILMN_2695158, ILMN_27…	1289	240	12504	1.37424	1	0.314922	53.836
GOTERM_CC_FAT	GO:0005813~centrosome	23	1.1165	0.0978198	ILMN_2742675, ILMN_2828492, ILMN_2464061, ILMN_3141738, ILMN_2712305, ILMN_2655204, ILMN_2620053, ILMN_1221067, ILMN_1218761, ILMN_2865939, ILMN_2721221, ILMN_2620304, ILMN_3161639, ILMN_2728697, ILMN_2647435, ILMN_2980063, ILMN_2736153, ILMN_3161327, ILMN_2420070, ILMN_2427063, ILMN_2664972, ILMN_2690077, ILMN_1216394	1289	160	12504	1.39445	1	0.440728	77.5204
GOTERM_CC_FAT	GO:0005815~microtubule organizing center	26	1.26214	0.114732	ILMN_2828492, ILMN_3141738, ILMN_2655204, ILMN_1216987, ILMN_2620053, ILMN_1218761, ILMN_2620304, ILMN_2829646, ILMN_2728697, ILMN_2980063, ILMN_3161327, ILMN_2736153, ILMN_2420070, ILMN_2427063, ILMN_2664972, ILMN_2690077, ILMN_2742675, ILMN_2464061, ILMN_2667889, ILMN_2712305, ILMN_1221067, ILMN_2865939, ILMN_2721221, ILMN_3161639, ILMN_2647435, ILMN_1216394	1289	189	12504	1.33447	1	0.47944	82.9146
SP_PIR_KEYWORDS	microtubule	29	1.40777	0.228819	ILMN_2686183, ILMN_2825020, ILMN_3034877, ILMN_2593410, ILMN_2632839, ILMN_2856861, ILMN_2847332, ILMN_1218761, ILMN_3161897, ILMN_1253677, ILMN_2517170, ILMN_1239133, ILMN_2830983, ILMN_3085841, ILMN_2420070, ILMN_2995290, ILMN_2664972, ILMN_3071764, ILMN_2690077, ILMN_2859659, ILMN_2464061, ILMN_2588051, ILMN_3150536, ILMN_2695158, ILMN_1227164, ILMN_2473620, ILMN_2721221, ILMN_2621148, ILMN_26…	1951	221	17854	1.20084	1	0.722997	97.6261
GOTERM_CC_FAT	GO:0044430~cytoskeletal part	77	3.73786	0.69344	ILMN_2921526, ILMN_2828492, ILMN_2742626, ILMN_3034877, ILMN_2825020, ILMN_2914510, ILMN_2666669, ILMN_2620053, ILMN_2847332, ILMN_3161897, ILMN_1215681, ILMN_1214394, ILMN_2662776, ILMN_2620304, ILMN_1239133, ILMN_2648709, ILMN_2830983, ILMN_2829646, ILMN_3110425, ILMN_2893683, ILMN_1216871, ILMN_3085841, ILMN_3161327, ILMN_2420070, ILMN_2995290, ILMN_2742675, ILMN_2588051, ILMN_3150536, ILMN_26…	1289	774	12504	0.965041	1	0.965101	100
GOTERM_BP_FAT	GO:0007017~microtubule-based process	21	1.01942	0.749335	ILMN_2859659, ILMN_2828492, ILMN_2464061, ILMN_2588051, ILMN_2695158, ILMN_1227164, ILMN_3034877, ILMN_2593410, ILMN_2839134, ILMN_2865939, ILMN_3024099, ILMN_2721221, ILMN_2517170, ILMN_1239133, ILMN_2621148, ILMN_2689274, ILMN_2740348, ILMN_2670778, ILMN_2615901, ILMN_2420070, ILMN_2427063, ILMN_2983228, ILMN_2690077	1454	211	13588	0.930096	1	0.999604	100
Annotation Cluster 113	Enrichment Score: 0.8491058620134814
Category	Term	Count	%	PValue	Genes	List Total	Pop Hits	Pop Total	Fold Enrichment	Bonferroni	Benjamini	FDR
GOTERM_MF_FAT	GO:0030374~ligand-dependent nuclear receptor transcription coactivator activity	8	0.38835	0.00408801	ILMN_2659132, ILMN_2820260, ILMN_2705969, ILMN_2877464, ILMN_3116330, ILMN_2669540, ILMN_3163539, ILMN_2684455, ILMN_2932539	1385	21	13288	3.65494	0.987817	0.125031	6.32378
GOTERM_MF_FAT	GO:0051427~hormone receptor binding	8	0.38835	0.105255	ILMN_1257428, ILMN_1229545, ILMN_3085126, ILMN_2877464, ILMN_3116330, ILMN_2719784, ILMN_2669540, ILMN_1245874, ILMN_2932539, ILMN_2743723, ILMN_2749937	1385	39	13288	1.96805	1	0.743307	83.0278
GOTERM_MF_FAT	GO:0030546~receptor activator activity	4	0.194175	0.121624	ILMN_2877464, ILMN_3116330, ILMN_2669540, ILMN_1216721, ILMN_2932539	1385	12	13288	3.19807	1	0.769798	87.3566
GOTERM_MF_FAT	GO:0035257~nuclear hormone receptor binding	7	0.339806	0.136484	ILMN_1257428, ILMN_1229545, ILMN_3085126, ILMN_2877464, ILMN_3116330, ILMN_2719784, ILMN_2669540, ILMN_2932539, ILMN_2749937	1385	34	13288	1.97528	1	0.784104	90.3685
GOTERM_MF_FAT	GO:0046966~thyroid hormone receptor binding	4	0.194175	0.172733	ILMN_1229545, ILMN_2877464, ILMN_3116330, ILMN_2669540, ILMN_2932539, ILMN_2749937	1385	14	13288	2.74121	1	0.846172	95.1395
GOTERM_MF_FAT	GO:0042809~vitamin D receptor binding	3	0.145631	0.280018	ILMN_2877464, ILMN_3116330, ILMN_2669540, ILMN_2932539	1385	10	13288	2.87827	1	0.936816	99.4695
GOTERM_MF_FAT	GO:0042974~retinoic acid receptor binding	4	0.194175	0.28723	ILMN_3085126, ILMN_2877464, ILMN_3116330, ILMN_2669540, ILMN_2932539	1385	18	13288	2.13205	1	0.939344	99.5482
GOTERM_MF_FAT	GO:0030545~receptor regulator activity	4	0.194175	0.316996	ILMN_2877464, ILMN_3116330, ILMN_2669540, ILMN_1216721, ILMN_2932539	1385	19	13288	2.01984	1	0.952105	99.7712
GOTERM_MF_FAT	GO:0030375~thyroid hormone receptor coactivator activity	3	0.145631	0.320348	ILMN_2877464, ILMN_3116330, ILMN_2669540, ILMN_2932539	1385	11	13288	2.61661	1	0.95183	99.7884
GOTERM_MF_FAT	GO:0010861~thyroid hormone receptor activator activity	3	0.145631	0.320348	ILMN_2877464, ILMN_3116330, ILMN_2669540, ILMN_2932539	1385	11	13288	2.61661	1	0.95183	99.7884
Annotation Cluster 114	Enrichment Score: 0.8406295268661906
Category	Term	Count	%	PValue	Genes	List Total	Pop Hits	Pop Total	Fold Enrichment	Bonferroni	Benjamini	FDR
INTERPRO	IPR018200:Peptidase C19, ubiquitin carboxyl-terminal hydrolase 2, conserved site	10	0.485437	0.10149	ILMN_2471268, ILMN_2418324, ILMN_2495939, ILMN_2952841, ILMN_1236369, ILMN_2990220, ILMN_1228352, ILMN_3161250, ILMN_2491301, ILMN_1253666, ILMN_2681814	1876	53	17763	1.78652	1	0.973468	84.6919
UP_SEQ_FEATURE	zinc finger region:UBP-type	4	0.194175	0.138747	ILMN_2471268, ILMN_2990220, ILMN_1228352, ILMN_2491301, ILMN_1253666	1937	11	16021	3.00765	1	0.999892	93.786
INTERPRO	IPR001394:Peptidase C19, ubiquitin carboxyl-terminal hydrolase 2	10	0.485437	0.142379	ILMN_2471268, ILMN_2418324, ILMN_2495939, ILMN_2952841, ILMN_1236369, ILMN_2990220, ILMN_1228352, ILMN_3161250, ILMN_2491301, ILMN_1253666, ILMN_2681814	1876	57	17763	1.66115	1	0.985591	93.2363
SMART	SM00290:ZnF_UBP	4	0.194175	0.175788	ILMN_2471268, ILMN_2990220, ILMN_1228352, ILMN_2491301, ILMN_1253666	960	14	9131	2.71756	1	0.872821	92.909
INTERPRO	IPR001607:Zinc finger, UBP-type	4	0.194175	0.177734	ILMN_2471268, ILMN_2990220, ILMN_1228352, ILMN_2491301, ILMN_1253666	1876	14	17763	2.7053	1	0.99248	96.7675
Annotation Cluster 115	Enrichment Score: 0.837479282703142
Category	Term	Count	%	PValue	Genes	List Total	Pop Hits	Pop Total	Fold Enrichment	Bonferroni	Benjamini	FDR
GOTERM_MF_FAT	GO:0008079~translation termination factor activity	4	0.194175	0.0177042	ILMN_2642063, ILMN_2646556, ILMN_2791578, ILMN_2995755	1385	6	13288	6.39615	1	0.341529	24.7882
GOTERM_MF_FAT	GO:0003747~translation release factor activity	4	0.194175	0.0177042	ILMN_2642063, ILMN_2646556, ILMN_2791578, ILMN_2995755	1385	6	13288	6.39615	1	0.341529	24.7882
GOTERM_BP_FAT	GO:0006415~translational termination	3	0.145631	0.0917644	ILMN_2642063, ILMN_2646556, ILMN_2995755	1454	5	13588	5.60715	1	0.749182	82.581
GOTERM_BP_FAT	GO:0043241~protein complex disassembly	4	0.194175	0.270953	ILMN_2642063, ILMN_2646556, ILMN_2624809, ILMN_2995755	1454	17	13588	2.19888	1	0.949581	99.6778
GOTERM_BP_FAT	GO:0043624~cellular protein complex disassembly	4	0.194175	0.270953	ILMN_2642063, ILMN_2646556, ILMN_2624809, ILMN_2995755	1454	17	13588	2.19888	1	0.949581	99.6778
GOTERM_BP_FAT	GO:0032984~macromolecular complex disassembly	4	0.194175	0.393068	ILMN_2642063, ILMN_2646556, ILMN_2624809, ILMN_2995755	1454	21	13588	1.78005	1	0.982508	99.9885
GOTERM_BP_FAT	GO:0034623~cellular macromolecular complex disassembly	4	0.194175	0.393068	ILMN_2642063, ILMN_2646556, ILMN_2624809, ILMN_2995755	1454	21	13588	1.78005	1	0.982508	99.9885
GOTERM_BP_FAT	GO:0022411~cellular component disassembly	5	0.242718	0.611806	ILMN_2642063, ILMN_2974798, ILMN_2646556, ILMN_2624809, ILMN_2995755	1454	39	13588	1.19811	1	0.997517	100
Annotation Cluster 116	Enrichment Score: 0.8364137488419657
Category	Term	Count	%	PValue	Genes	List Total	Pop Hits	Pop Total	Fold Enrichment	Bonferroni	Benjamini	FDR
GOTERM_MF_FAT	GO:0005338~nucleotide-sugar transmembrane transporter activity	3	0.145631	0.0563766	ILMN_2600043, ILMN_2600042, ILMN_2970345, ILMN_2974069	1385	4	13288	7.19567	1	0.584973	60.3621
INTERPRO	IPR004689:UDP-galactose transporter	3	0.145631	0.057797	ILMN_2600043, ILMN_2600042, ILMN_2970345, ILMN_2974069	1876	4	17763	7.10141	1	0.937418	64.7982
GOTERM_BP_FAT	GO:0015780~nucleotide-sugar transport	3	0.145631	0.0591923	ILMN_2600043, ILMN_2600042, ILMN_2970345, ILMN_2974069	1454	4	13588	7.00894	1	0.642074	66.9735
GOTERM_MF_FAT	GO:0005351~sugar:hydrogen symporter activity	5	0.242718	0.0771231	ILMN_2600043, ILMN_3108560, ILMN_2600042, ILMN_2970345, ILMN_2974069, ILMN_2721221	1385	16	13288	2.99819	1	0.664842	72.1938
GOTERM_MF_FAT	GO:0005402~cation:sugar symporter activity	5	0.242718	0.0771231	ILMN_2600043, ILMN_3108560, ILMN_2600042, ILMN_2970345, ILMN_2974069, ILMN_2721221	1385	16	13288	2.99819	1	0.664842	72.1938
PIR_SUPERFAMILY	PIRSF005799:nucleotide-sugar transporter	3	0.145631	0.0789827	ILMN_2600043, ILMN_2600042, ILMN_2970345, ILMN_2974069	801	5	8136	6.09438	1	1	72.3461
INTERPRO	IPR007271:Nucleotide-sugar transporter	3	0.145631	0.0896844	ILMN_2600043, ILMN_2600042, ILMN_2970345, ILMN_2974069	1876	5	17763	5.68113	1	0.964186	80.7541
GOTERM_MF_FAT	GO:0015295~solute:hydrogen symporter activity	5	0.242718	0.128477	ILMN_2600043, ILMN_3108560, ILMN_2600042, ILMN_2970345, ILMN_2974069, ILMN_2721221	1385	19	13288	2.5248	1	0.76892	88.8413
GOTERM_MF_FAT	GO:0051119~sugar transmembrane transporter activity	5	0.242718	0.235938	ILMN_2600043, ILMN_3108560, ILMN_2600042, ILMN_2970345, ILMN_2974069, ILMN_2721221	1385	24	13288	1.9988	1	0.908649	98.6315
GOTERM_MF_FAT	GO:0015294~solute:cation symporter activity	10	0.485437	0.348811	ILMN_2716511, ILMN_2600043, ILMN_3162636, ILMN_3108560, ILMN_3146420, ILMN_2600042, ILMN_2970345, ILMN_2974069, ILMN_1212645, ILMN_2721221, ILMN_2707789	1385	73	13288	1.31428	1	0.959451	99.8931
SP_PIR_KEYWORDS	sugar transport	6	0.291262	0.356809	ILMN_3134301, ILMN_2600043, ILMN_2722497, ILMN_3108560, ILMN_2600042, ILMN_2970345, ILMN_2974069	1951	36	17854	1.5252	1	0.82342	99.8259
GOTERM_BP_FAT	GO:0008643~carbohydrate transport	8	0.38835	0.463986	ILMN_2788475, ILMN_3134301, ILMN_2600043, ILMN_2722497, ILMN_3108560, ILMN_2600042, ILMN_2970345, ILMN_2974069, ILMN_2721221	1454	60	13588	1.24603	1	0.990999	99.9988
GOTERM_MF_FAT	GO:0015293~symporter activity	10	0.485437	0.940981	ILMN_2716511, ILMN_2600043, ILMN_3162636, ILMN_3108560, ILMN_3146420, ILMN_2600042, ILMN_2970345, ILMN_2974069, ILMN_1212645, ILMN_2721221, ILMN_2707789	1385	132	13288	0.726835	1	0.999997	100
Annotation Cluster 117	Enrichment Score: 0.8332705963654053
Category	Term	Count	%	PValue	Genes	List Total	Pop Hits	Pop Total	Fold Enrichment	Bonferroni	Benjamini	FDR
GOTERM_MF_FAT	GO:0008094~DNA-dependent ATPase activity	8	0.38835	0.0943971	ILMN_2997308, ILMN_1218154, ILMN_2703082, ILMN_2637203, ILMN_2755140, ILMN_2710538, ILMN_2758632, ILMN_2758631, ILMN_1240620	1385	38	13288	2.01984	1	0.723466	79.4279
GOTERM_MF_FAT	GO:0008353~RNA polymerase II carboxy-terminal domain kinase activity	4	0.194175	0.121624	ILMN_2683933, ILMN_2997308, ILMN_1218154, ILMN_2758632, ILMN_2758631	1385	12	13288	3.19807	1	0.769798	87.3566
GOTERM_CC_FAT	GO:0005675~holo TFIIH complex	3	0.145631	0.275557	ILMN_2997308, ILMN_1218154, ILMN_2758632, ILMN_2758631	1289	10	12504	2.91016	1	0.736199	99.0664
Annotation Cluster 118	Enrichment Score: 0.8312418339777567
Category	Term	Count	%	PValue	Genes	List Total	Pop Hits	Pop Total	Fold Enrichment	Bonferroni	Benjamini	FDR
GOTERM_MF_FAT	GO:0004518~nuclease activity	24	1.16505	0.0484586	ILMN_1232428, ILMN_2933993, ILMN_1254380, ILMN_2927225, ILMN_1218584, ILMN_3026198, ILMN_2716585, ILMN_2853658, ILMN_3154111, ILMN_2628175, ILMN_1259904, ILMN_2996667, ILMN_2907499, ILMN_1224534, ILMN_2440803, ILMN_2859678, ILMN_2715289, ILMN_2932787, ILMN_2728539, ILMN_2728538, ILMN_1242419, ILMN_3160556, ILMN_1259684, ILMN_2610703, ILMN_3066222, ILMN_2610706, ILMN_3144358, ILMN_2774825, ILMN_26…	1385	154	13288	1.4952	1	0.555055	54.7121
SP_PIR_KEYWORDS	nuclease	17	0.825243	0.0871797	ILMN_2933993, ILMN_1224534, ILMN_2859678, ILMN_2927225, ILMN_2715289, ILMN_2728539, ILMN_3026198, ILMN_2728538, ILMN_2716585, ILMN_2853658, ILMN_1242419, ILMN_3160556, ILMN_3154111, ILMN_1259684, ILMN_2628175, ILMN_2610703, ILMN_3066222, ILMN_1259904, ILMN_2610706, ILMN_2996667, ILMN_3144358, ILMN_2774825, ILMN_2816876	1951	102	17854	1.5252	1	0.433887	73.1037
GOTERM_MF_FAT	GO:0004519~endonuclease activity	16	0.776699	0.113828	ILMN_2907499, ILMN_1232428, ILMN_1254380, ILMN_2859678, ILMN_3026198, ILMN_1218584, ILMN_2716585, ILMN_2853658, ILMN_3160556, ILMN_3154111, ILMN_1259684, ILMN_2628175, ILMN_2610703, ILMN_3066222, ILMN_1259904, ILMN_2610706, ILMN_3144358, ILMN_2774825, ILMN_2816876, ILMN_2619362	1385	103	13288	1.49036	1	0.749245	85.4434
GOTERM_MF_FAT	GO:0004549~tRNA-specific ribonuclease activity	4	0.194175	0.121624	ILMN_1232428, ILMN_2628175, ILMN_1218584, ILMN_2619362	1385	12	13288	3.19807	1	0.769798	87.3566
GOTERM_MF_FAT	GO:0016893~endonuclease activity, active with either ribo- or deoxyribonucleic acids and producing 5'-phosphomonoesters	7	0.339806	0.136484	ILMN_2907499, ILMN_1232428, ILMN_1254380, ILMN_3066222, ILMN_1218584, ILMN_3144358, ILMN_2716585, ILMN_2619362	1385	34	13288	1.97528	1	0.784104	90.3685
GOTERM_MF_FAT	GO:0016891~endoribonuclease activity, producing 5'-phosphomonoesters	6	0.291262	0.160529	ILMN_1232428, ILMN_1254380, ILMN_3066222, ILMN_1218584, ILMN_3144358, ILMN_2716585, ILMN_2619362	1385	28	13288	2.05591	1	0.825067	93.8609
SP_PIR_KEYWORDS	Endonuclease	11	0.533981	0.167533	ILMN_2859678, ILMN_3026198, ILMN_2716585, ILMN_2853658, ILMN_3160556, ILMN_3154111, ILMN_1259684, ILMN_2610703, ILMN_2628175, ILMN_1259904, ILMN_3066222, ILMN_2610706, ILMN_3144358, ILMN_2774825, ILMN_2816876	1951	65	17854	1.54867	1	0.626128	92.862
GOTERM_MF_FAT	GO:0004540~ribonuclease activity	10	0.485437	0.274389	ILMN_1232428, ILMN_1254380, ILMN_3154111, ILMN_2628175, ILMN_3066222, ILMN_2932787, ILMN_2715289, ILMN_1218584, ILMN_3026198, ILMN_3144358, ILMN_2716585, ILMN_2619362	1385	68	13288	1.41092	1	0.933958	99.3994
GOTERM_MF_FAT	GO:0004526~ribonuclease P activity	3	0.145631	0.280018	ILMN_1232428, ILMN_1218584, ILMN_2619362	1385	10	13288	2.87827	1	0.936816	99.4695
GOTERM_MF_FAT	GO:0004521~endoribonuclease activity	8	0.38835	0.295287	ILMN_1232428, ILMN_1254380, ILMN_3154111, ILMN_2628175, ILMN_3066222, ILMN_1218584, ILMN_3026198, ILMN_3144358, ILMN_2716585, ILMN_2619362	1385	52	13288	1.47603	1	0.943557	99.6231
Annotation Cluster 119	Enrichment Score: 0.8163677036487442
Category	Term	Count	%	PValue	Genes	List Total	Pop Hits	Pop Total	Fold Enrichment	Bonferroni	Benjamini	FDR
SP_PIR_KEYWORDS	Endocytosis	18	0.873786	0.0227583	ILMN_2712697, ILMN_2703738, ILMN_1228349, ILMN_1250501, ILMN_1221067, ILMN_2745354, ILMN_2604688, ILMN_1240590, ILMN_1221255, ILMN_1243908, ILMN_2999748, ILMN_1237891, ILMN_2853342, ILMN_2854878, ILMN_2599751, ILMN_2710604, ILMN_2942097, ILMN_3159720, ILMN_1236988, ILMN_3143246, ILMN_2628066	1951	93	17854	1.7712	0.99999	0.159749	28.2098
GOTERM_BP_FAT	GO:0006897~endocytosis	24	1.16505	0.277618	ILMN_1250501, ILMN_2745354, ILMN_1240590, ILMN_1221255, ILMN_2644632, ILMN_2659616, ILMN_2854878, ILMN_2710604, ILMN_2942097, ILMN_1221703, ILMN_1236988, ILMN_2761459, ILMN_2712697, ILMN_1228349, ILMN_2703738, ILMN_2604688, ILMN_1221067, ILMN_1223624, ILMN_2786764, ILMN_2999748, ILMN_1243908, ILMN_2786763, ILMN_1237891, ILMN_2853342, ILMN_2599751, ILMN_3159720, ILMN_3143246, ILMN_2628066	1454	188	13588	1.19301	1	0.951257	99.7273
GOTERM_BP_FAT	GO:0010324~membrane invagination	24	1.16505	0.277618	ILMN_1250501, ILMN_2745354, ILMN_1240590, ILMN_1221255, ILMN_2644632, ILMN_2659616, ILMN_2854878, ILMN_2710604, ILMN_2942097, ILMN_1221703, ILMN_1236988, ILMN_2761459, ILMN_2712697, ILMN_1228349, ILMN_2703738, ILMN_2604688, ILMN_1221067, ILMN_1223624, ILMN_2786764, ILMN_2999748, ILMN_1243908, ILMN_2786763, ILMN_1237891, ILMN_2853342, ILMN_2599751, ILMN_3159720, ILMN_3143246, ILMN_2628066	1454	188	13588	1.19301	1	0.951257	99.7273
GOTERM_BP_FAT	GO:0016044~membrane organization	33	1.60194	0.309381	ILMN_1226978, ILMN_1250501, ILMN_2745354, ILMN_1240590, ILMN_1221255, ILMN_2605941, ILMN_2644632, ILMN_2928560, ILMN_2659616, ILMN_2854878, ILMN_2626653, ILMN_2710604, ILMN_2942097, ILMN_1221703, ILMN_1236988, ILMN_1246724, ILMN_2466845, ILMN_2761459, ILMN_2712697, ILMN_3121891, ILMN_2703738, ILMN_1228349, ILMN_1221067, ILMN_2604688, ILMN_1223624, ILMN_2786764, ILMN_2999748, ILMN_1243908, ILMN_24…	1454	272	13588	1.1338	1	0.963335	99.8795
Annotation Cluster 120	Enrichment Score: 0.806511448915675
Category	Term	Count	%	PValue	Genes	List Total	Pop Hits	Pop Total	Fold Enrichment	Bonferroni	Benjamini	FDR
GOTERM_BP_FAT	GO:0030330~DNA damage response, signal transduction by p53 class mediator	6	0.291262	0.0450892	ILMN_2749717, ILMN_2466845, ILMN_2705324, ILMN_2690620, ILMN_2652575, ILMN_2652572, ILMN_2839973	1454	19	13588	2.95113	1	0.586301	56.7297
GOTERM_BP_FAT	GO:0042770~DNA damage response, signal transduction	11	0.533981	0.0783406	ILMN_2749717, ILMN_2610835, ILMN_2933993, ILMN_2466845, ILMN_1230273, ILMN_2732689, ILMN_2705324, ILMN_2690620, ILMN_1245874, ILMN_2652575, ILMN_2839973, ILMN_2652572, ILMN_2907878, ILMN_2743723	1454	57	13588	1.80347	1	0.708426	77.2639
GOTERM_BP_FAT	GO:0042771~DNA damage response, signal transduction by p53 class mediator resulting in induction of apoptosis	4	0.194175	0.182647	ILMN_2749717, ILMN_2466845, ILMN_2705324, ILMN_2690620	1454	14	13588	2.67007	1	0.893616	97.4317
GOTERM_BP_FAT	GO:0008629~induction of apoptosis by intracellular signals	6	0.291262	0.317809	ILMN_2749717, ILMN_2466845, ILMN_2705324, ILMN_1217890, ILMN_2690620, ILMN_1221981	1454	35	13588	1.60204	1	0.964944	99.9036
GOTERM_BP_FAT	GO:0008630~DNA damage response, signal transduction resulting in induction of apoptosis	4	0.194175	0.452485	ILMN_2749717, ILMN_2466845, ILMN_2705324, ILMN_2690620	1454	23	13588	1.62526	1	0.989878	99.9982
Annotation Cluster 121	Enrichment Score: 0.802722112635567
Category	Term	Count	%	PValue	Genes	List Total	Pop Hits	Pop Total	Fold Enrichment	Bonferroni	Benjamini	FDR
SMART	SM00593:RUN	5	0.242718	0.112577	ILMN_2635232, ILMN_2917441, ILMN_2741006, ILMN_3107607, ILMN_2987294, ILMN_1236988	960	18	9131	2.64207	1	0.813929	80.5019
INTERPRO	IPR004012:RUN	5	0.242718	0.114268	ILMN_2635232, ILMN_2917441, ILMN_2741006, ILMN_3107607, ILMN_2987294, ILMN_1236988	1876	18	17763	2.63015	1	0.976272	88.0924
UP_SEQ_FEATURE	domain:RUN	4	0.194175	0.303709	ILMN_2917441, ILMN_2741006, ILMN_2987294, ILMN_1236988	1937	16	16021	2.06776	1	0.999999	99.8809
Annotation Cluster 122	Enrichment Score: 0.7969902835864133
Category	Term	Count	%	PValue	Genes	List Total	Pop Hits	Pop Total	Fold Enrichment	Bonferroni	Benjamini	FDR
GOTERM_BP_FAT	GO:0006007~glucose catabolic process	12	0.582524	0.0197408	ILMN_2856157, ILMN_2693985, ILMN_2628892, ILMN_2679851, ILMN_3161591, ILMN_2633148, ILMN_1247221, ILMN_2639805, ILMN_1377924, ILMN_2675261, ILMN_1252214, ILMN_2757569, ILMN_3141499, ILMN_2588056	1454	52	13588	2.1566	1	0.390947	30.3727
GOTERM_BP_FAT	GO:0019320~hexose catabolic process	12	0.582524	0.0197408	ILMN_2856157, ILMN_2693985, ILMN_2628892, ILMN_2679851, ILMN_3161591, ILMN_2633148, ILMN_1247221, ILMN_2639805, ILMN_1377924, ILMN_2675261, ILMN_1252214, ILMN_2757569, ILMN_3141499, ILMN_2588056	1454	52	13588	2.1566	1	0.390947	30.3727
GOTERM_BP_FAT	GO:0046365~monosaccharide catabolic process	12	0.582524	0.0257085	ILMN_2856157, ILMN_2693985, ILMN_2628892, ILMN_2679851, ILMN_3161591, ILMN_2633148, ILMN_1247221, ILMN_2639805, ILMN_1377924, ILMN_2675261, ILMN_1252214, ILMN_2757569, ILMN_3141499, ILMN_2588056	1454	54	13588	2.07672	1	0.464055	37.6799
GOTERM_BP_FAT	GO:0046164~alcohol catabolic process	13	0.631068	0.0409988	ILMN_2856157, ILMN_2693985, ILMN_2628892, ILMN_2679851, ILMN_3161591, ILMN_2633148, ILMN_1247221, ILMN_2639805, ILMN_1377924, ILMN_2675261, ILMN_1252214, ILMN_2757569, ILMN_3141499, ILMN_2588056, ILMN_2850077	1454	65	13588	1.86905	1	0.566321	53.2378
GOTERM_BP_FAT	GO:0006098~pentose-phosphate shunt	4	0.194175	0.0452631	ILMN_1247221, ILMN_2693985, ILMN_2675261, ILMN_3141499	1454	8	13588	4.67263	1	0.585585	56.8725
GOTERM_BP_FAT	GO:0044275~cellular carbohydrate catabolic process	12	0.582524	0.0512594	ILMN_2856157, ILMN_2693985, ILMN_2628892, ILMN_2679851, ILMN_3161591, ILMN_2633148, ILMN_1247221, ILMN_2639805, ILMN_1377924, ILMN_2675261, ILMN_1252214, ILMN_2757569, ILMN_3141499, ILMN_2588056	1454	60	13588	1.86905	1	0.61341	61.5343
GOTERM_BP_FAT	GO:0006733~oxidoreduction coenzyme metabolic process	8	0.38835	0.105088	ILMN_1247221, ILMN_2693985, ILMN_2607951, ILMN_2675261, ILMN_2898403, ILMN_3141499, ILMN_2774456, ILMN_2808355	1454	38	13588	1.96742	1	0.785746	86.6804
GOTERM_BP_FAT	GO:0016052~carbohydrate catabolic process	13	0.631068	0.152716	ILMN_2856157, ILMN_2693985, ILMN_2628892, ILMN_2679851, ILMN_3161591, ILMN_2633148, ILMN_1247221, ILMN_2639805, ILMN_1377924, ILMN_2675261, ILMN_1252214, ILMN_2661971, ILMN_2757569, ILMN_3141499, ILMN_2588056	1454	81	13588	1.49986	1	0.858487	95.0655
GOTERM_BP_FAT	GO:0006739~NADP metabolic process	4	0.194175	0.182647	ILMN_1247221, ILMN_2693985, ILMN_2675261, ILMN_3141499	1454	14	13588	2.67007	1	0.893616	97.4317
GOTERM_BP_FAT	GO:0006096~glycolysis	8	0.38835	0.185388	ILMN_2856157, ILMN_2628892, ILMN_2679851, ILMN_2639805, ILMN_1377924, ILMN_3161591, ILMN_1252214, ILMN_2757569, ILMN_2633148, ILMN_2588056	1454	44	13588	1.69914	1	0.895103	97.5836
GOTERM_BP_FAT	GO:0019318~hexose metabolic process	23	1.1165	0.192732	ILMN_2856157, ILMN_2628892, ILMN_2683811, ILMN_2633148, ILMN_2687156, ILMN_2805945, ILMN_2615547, ILMN_1247221, ILMN_1377924, ILMN_1252214, ILMN_2616709, ILMN_3132204, ILMN_2693985, ILMN_2679851, ILMN_3161591, ILMN_2620913, ILMN_1215550, ILMN_2711442, ILMN_2725082, ILMN_2639805, ILMN_2675261, ILMN_2757569, ILMN_3141499, ILMN_2725083, ILMN_2599360, ILMN_2695964, ILMN_2588056, ILMN_2626098	1454	169	13588	1.27184	1	0.903524	97.95
GOTERM_BP_FAT	GO:0005996~monosaccharide metabolic process	24	1.16505	0.304266	ILMN_2856157, ILMN_2628892, ILMN_2683811, ILMN_2633148, ILMN_2687156, ILMN_2805945, ILMN_2615547, ILMN_1247221, ILMN_1377924, ILMN_1252214, ILMN_2616709, ILMN_3132204, ILMN_2693985, ILMN_2679851, ILMN_3161591, ILMN_2620913, ILMN_1215550, ILMN_2711442, ILMN_2725082, ILMN_2639805, ILMN_2675261, ILMN_2757569, ILMN_2605556, ILMN_3141499, ILMN_2725083, ILMN_2599360, ILMN_2695964, ILMN_2588056, ILMN_26…	1454	191	13588	1.17427	1	0.961187	99.8622
SP_PIR_KEYWORDS	glycolysis	7	0.339806	0.307479	ILMN_2856157, ILMN_2628892, ILMN_2679851, ILMN_2639805, ILMN_1377924, ILMN_1252214, ILMN_2757569, ILMN_2633148, ILMN_2588056	1951	42	17854	1.5252	1	0.794133	99.4956
GOTERM_BP_FAT	GO:0006006~glucose metabolic process	18	0.873786	0.326618	ILMN_2856157, ILMN_2693985, ILMN_2628892, ILMN_2679851, ILMN_3161591, ILMN_2620913, ILMN_2633148, ILMN_1215550, ILMN_2805945, ILMN_1247221, ILMN_2725082, ILMN_2639805, ILMN_2675261, ILMN_1377924, ILMN_1252214, ILMN_2757569, ILMN_2616709, ILMN_3141499, ILMN_2695964, ILMN_2725083, ILMN_2626098, ILMN_2588056	1454	140	13588	1.20153	1	0.967533	99.9238
GOTERM_BP_FAT	GO:0019362~pyridine nucleotide metabolic process	5	0.242718	0.351105	ILMN_1247221, ILMN_2693985, ILMN_2607951, ILMN_2675261, ILMN_3141499	1454	28	13588	1.6688	1	0.974274	99.9611
GOTERM_BP_FAT	GO:0043603~cellular amide metabolic process	6	0.291262	0.406157	ILMN_1247221, ILMN_2693985, ILMN_2675261, ILMN_1247147, ILMN_2976191, ILMN_3141499	1454	39	13588	1.43773	1	0.984554	99.9922
GOTERM_BP_FAT	GO:0009820~alkaloid metabolic process	4	0.194175	0.481288	ILMN_1247221, ILMN_2693985, ILMN_2675261, ILMN_3141499	1454	24	13588	1.55754	1	0.992133	99.9993
GOTERM_BP_FAT	GO:0006769~nicotinamide metabolic process	4	0.194175	0.481288	ILMN_1247221, ILMN_2693985, ILMN_2675261, ILMN_3141499	1454	24	13588	1.55754	1	0.992133	99.9993
GOTERM_BP_FAT	GO:0046496~nicotinamide nucleotide metabolic process	4	0.194175	0.481288	ILMN_1247221, ILMN_2693985, ILMN_2675261, ILMN_3141499	1454	24	13588	1.55754	1	0.992133	99.9993
KEGG_PATHWAY	mmu00010:Glycolysis / Gluconeogenesis	9	0.436893	0.496845	ILMN_2856157, ILMN_1231116, ILMN_2628892, ILMN_2733179, ILMN_2679851, ILMN_2734181, ILMN_1377924, ILMN_1252214, ILMN_2687156, ILMN_2757569, ILMN_2850077, ILMN_2588056	643	68	5738	1.18109	1	0.731426	99.9785
GOTERM_BP_FAT	GO:0019748~secondary metabolic process	7	0.339806	0.760938	ILMN_1247221, ILMN_1255644, ILMN_2693985, ILMN_2675261, ILMN_3141499, ILMN_2774486, ILMN_2850077	1454	69	13588	0.948069	1	0.999671	100
Annotation Cluster 123	Enrichment Score: 0.7963919900698113
Category	Term	Count	%	PValue	Genes	List Total	Pop Hits	Pop Total	Fold Enrichment	Bonferroni	Benjamini	FDR
GOTERM_BP_FAT	GO:0006265~DNA topological change	4	0.194175	0.030688	ILMN_2432458, ILMN_1218154, ILMN_3096933, ILMN_1232251	1454	7	13588	5.34015	1	0.496162	43.2164
GOTERM_MF_FAT	GO:0003917~DNA topoisomerase type I activity	3	0.145631	0.0563766	ILMN_2432458, ILMN_3096933, ILMN_1232251	1385	4	13288	7.19567	1	0.584973	60.3621
GOTERM_MF_FAT	GO:0003916~DNA topoisomerase activity	3	0.145631	0.122498	ILMN_2432458, ILMN_3096933, ILMN_1232251	1385	6	13288	4.79711	1	0.768843	87.5558
SP_PIR_KEYWORDS	topoisomerase	3	0.145631	0.132831	ILMN_2432458, ILMN_3096933, ILMN_1232251	1951	6	17854	4.5756	1	0.546246	87.1495
GOTERM_BP_FAT	GO:0006261~DNA-dependent DNA replication	6	0.291262	0.29599	ILMN_2949886, ILMN_2432458, ILMN_3096933, ILMN_1232251, ILMN_2968807, ILMN_2716585	1454	34	13588	1.64916	1	0.959084	99.8292
GOTERM_BP_FAT	GO:0006268~DNA unwinding during replication	3	0.145631	0.332173	ILMN_2432458, ILMN_3096933, ILMN_1232251	1454	11	13588	2.54871	1	0.968926	99.9345
GOTERM_BP_FAT	GO:0032508~DNA duplex unwinding	3	0.145631	0.372785	ILMN_2432458, ILMN_3096933, ILMN_1232251	1454	12	13588	2.33631	1	0.979489	99.979
GOTERM_BP_FAT	GO:0032392~DNA geometric change	3	0.145631	0.412354	ILMN_2432458, ILMN_3096933, ILMN_1232251	1454	13	13588	2.1566	1	0.985193	99.9936
Annotation Cluster 124	Enrichment Score: 0.7820196576505161
Category	Term	Count	%	PValue	Genes	List Total	Pop Hits	Pop Total	Fold Enrichment	Bonferroni	Benjamini	FDR
GOTERM_BP_FAT	GO:0033044~regulation of chromosome organization	6	0.291262	0.0660864	ILMN_2940510, ILMN_2745450, ILMN_2466845, ILMN_2648973, ILMN_2837476, ILMN_1227863	1454	21	13588	2.67007	1	0.667037	71.102
GOTERM_BP_FAT	GO:0031058~positive regulation of histone modification	3	0.145631	0.167107	ILMN_2466845, ILMN_2837476, ILMN_1227863	1454	7	13588	4.00511	1	0.877089	96.3846
GOTERM_BP_FAT	GO:0031056~regulation of histone modification	4	0.194175	0.211294	ILMN_2466845, ILMN_2648973, ILMN_2837476, ILMN_1227863	1454	15	13588	2.49207	1	0.917886	98.6563
GOTERM_BP_FAT	GO:0010638~positive regulation of organelle organization	8	0.38835	0.3191	ILMN_1254154, ILMN_2659616, ILMN_2466845, ILMN_2906471, ILMN_2655204, ILMN_2756460, ILMN_2837476, ILMN_2906473, ILMN_1238928, ILMN_1227863	1454	52	13588	1.43773	1	0.965206	99.9068
Annotation Cluster 125	Enrichment Score: 0.7803025561300307
Category	Term	Count	%	PValue	Genes	List Total	Pop Hits	Pop Total	Fold Enrichment	Bonferroni	Benjamini	FDR
GOTERM_BP_FAT	GO:0032386~regulation of intracellular transport	10	0.485437	0.0308287	ILMN_2616262, ILMN_1239494, ILMN_1245330, ILMN_1245874, ILMN_2718815, ILMN_2833378, ILMN_1216987, ILMN_2833376, ILMN_2986978, ILMN_1223793, ILMN_1216871, ILMN_1216721, ILMN_2748537, ILMN_2743723	1454	42	13588	2.22506	1	0.495425	43.3658
GOTERM_BP_FAT	GO:0033157~regulation of intracellular protein transport	8	0.38835	0.0354971	ILMN_2616262, ILMN_1239494, ILMN_1216871, ILMN_1245330, ILMN_1216721, ILMN_2833378, ILMN_2718815, ILMN_1245874, ILMN_2748537, ILMN_2833376, ILMN_2986978, ILMN_2743723	1454	30	13588	2.49207	1	0.524913	48.1196
GOTERM_BP_FAT	GO:0046822~regulation of nucleocytoplasmic transport	8	0.38835	0.0737358	ILMN_2616262, ILMN_1239494, ILMN_1223793, ILMN_1245330, ILMN_1216721, ILMN_2833378, ILMN_2718815, ILMN_1245874, ILMN_2748537, ILMN_2833376, ILMN_2986978, ILMN_2743723	1454	35	13588	2.13606	1	0.690755	75.1106
GOTERM_BP_FAT	GO:0032880~regulation of protein localization	15	0.728155	0.0966007	ILMN_2616262, ILMN_2960750, ILMN_1239494, ILMN_2914510, ILMN_2605096, ILMN_1245330, ILMN_2605094, ILMN_2718815, ILMN_2833378, ILMN_1245874, ILMN_2655204, ILMN_2833376, ILMN_2986978, ILMN_2865939, ILMN_3134412, ILMN_1254154, ILMN_1216871, ILMN_1216721, ILMN_2748537, ILMN_2743723	1454	90	13588	1.55754	1	0.763199	84.1904
GOTERM_BP_FAT	GO:0051223~regulation of protein transport	11	0.533981	0.152137	ILMN_2616262, ILMN_2960750, ILMN_1239494, ILMN_1245330, ILMN_1245874, ILMN_2718815, ILMN_2833378, ILMN_2833376, ILMN_2986978, ILMN_1254154, ILMN_3134412, ILMN_1216871, ILMN_1216721, ILMN_2748537, ILMN_2743723	1454	65	13588	1.5815	1	0.859371	95.004
GOTERM_BP_FAT	GO:0046825~regulation of protein export from nucleus	3	0.145631	0.167107	ILMN_1216721, ILMN_2833378, ILMN_1245874, ILMN_2833376, ILMN_2743723	1454	7	13588	4.00511	1	0.877089	96.3846
GOTERM_BP_FAT	GO:0070201~regulation of establishment of protein localization	11	0.533981	0.224133	ILMN_2616262, ILMN_2960750, ILMN_1239494, ILMN_1245330, ILMN_1245874, ILMN_2718815, ILMN_2833378, ILMN_2833376, ILMN_2986978, ILMN_1254154, ILMN_3134412, ILMN_1216871, ILMN_1216721, ILMN_2748537, ILMN_2743723	1454	71	13588	1.44786	1	0.928503	99.0025
GOTERM_BP_FAT	GO:0051224~negative regulation of protein transport	4	0.194175	0.332109	ILMN_2616262, ILMN_3134412, ILMN_1216721, ILMN_2718815	1454	19	13588	1.96742	1	0.969187	99.9344
GOTERM_BP_FAT	GO:0046823~negative regulation of nucleocytoplasmic transport	3	0.145631	0.332173	ILMN_2616262, ILMN_1216721, ILMN_2718815	1454	11	13588	2.54871	1	0.968926	99.9345
GOTERM_BP_FAT	GO:0032387~negative regulation of intracellular transport	3	0.145631	0.372785	ILMN_2616262, ILMN_1216721, ILMN_2718815	1454	12	13588	2.33631	1	0.979489	99.979
GOTERM_BP_FAT	GO:0042306~regulation of protein import into nucleus	4	0.194175	0.42304	ILMN_2616262, ILMN_1239494, ILMN_1245330, ILMN_2718815, ILMN_2748537, ILMN_2986978	1454	22	13588	1.69914	1	0.986922	99.9954
GOTERM_BP_FAT	GO:0060341~regulation of cellular localization	18	0.873786	0.5602	ILMN_2616262, ILMN_2960750, ILMN_1239494, ILMN_2628892, ILMN_1245330, ILMN_2655204, ILMN_2718815, ILMN_2833378, ILMN_1245874, ILMN_1216987, ILMN_2833376, ILMN_2937596, ILMN_2986978, ILMN_2805945, ILMN_2832675, ILMN_3134412, ILMN_2660233, ILMN_1216871, ILMN_1223793, ILMN_1216721, ILMN_1252214, ILMN_2748537, ILMN_2695964, ILMN_2743723	1454	161	13588	1.04481	1	0.995906	100
Annotation Cluster 126	Enrichment Score: 0.7757648598660178
Category	Term	Count	%	PValue	Genes	List Total	Pop Hits	Pop Total	Fold Enrichment	Bonferroni	Benjamini	FDR
GOTERM_BP_FAT	GO:0021915~neural tube development	17	0.825243	0.013768	ILMN_2941992, ILMN_1215252, ILMN_2960750, ILMN_2641647, ILMN_2760593, ILMN_2986978, ILMN_2645439, ILMN_2788283, ILMN_2933834, ILMN_2748839, ILMN_2829646, ILMN_2621148, ILMN_3085841, ILMN_3131909, ILMN_2652749, ILMN_3097868, ILMN_3135566	1454	83	13588	1.91409	1	0.320495	22.2537
GOTERM_BP_FAT	GO:0035295~tube development	38	1.84466	0.0520969	ILMN_1215252, ILMN_2886828, ILMN_2945275, ILMN_2472444, ILMN_3121255, ILMN_3114585, ILMN_2615448, ILMN_2788283, ILMN_2829646, ILMN_3123303, ILMN_2652187, ILMN_1228414, ILMN_3085841, ILMN_1225565, ILMN_2653312, ILMN_2729153, ILMN_2953411, ILMN_2842137, ILMN_3100042, ILMN_3005669, ILMN_2941992, ILMN_2960750, ILMN_2511913, ILMN_3052632, ILMN_2852034, ILMN_2609887, ILMN_1247147, ILMN_2472451, ILMN_29…	1454	264	13588	1.34515	1	0.615444	62.1462
GOTERM_BP_FAT	GO:0060562~epithelial tube morphogenesis	18	0.873786	0.0814345	ILMN_1215252, ILMN_2511913, ILMN_2960750, ILMN_2609887, ILMN_2930707, ILMN_3114585, ILMN_2788283, ILMN_2736999, ILMN_2933834, ILMN_2748839, ILMN_2829646, ILMN_3085841, ILMN_3131909, ILMN_2652749, ILMN_3097868, ILMN_1245731, ILMN_2842137, ILMN_3100042, ILMN_3135566	1454	111	13588	1.51545	1	0.719555	78.6105
GOTERM_BP_FAT	GO:0001841~neural tube formation	10	0.485437	0.0892877	ILMN_2788283, ILMN_2960750, ILMN_2933834, ILMN_2748839, ILMN_2829646, ILMN_3085841, ILMN_2652749, ILMN_3131909, ILMN_3097868, ILMN_3135566	1454	51	13588	1.8324	1	0.742297	81.6981
GOTERM_BP_FAT	GO:0001838~embryonic epithelial tube formation	10	0.485437	0.117724	ILMN_2788283, ILMN_2960750, ILMN_2933834, ILMN_2748839, ILMN_2829646, ILMN_3085841, ILMN_2652749, ILMN_3131909, ILMN_3097868, ILMN_3135566	1454	54	13588	1.7306	1	0.811073	89.7114
GOTERM_BP_FAT	GO:0048729~tissue morphogenesis	32	1.5534	0.143147	ILMN_1215252, ILMN_3109289, ILMN_3114585, ILMN_2851288, ILMN_2788283, ILMN_2829646, ILMN_1257208, ILMN_1228414, ILMN_3085841, ILMN_1225565, ILMN_1235481, ILMN_2653312, ILMN_2776025, ILMN_2842137, ILMN_3100042, ILMN_2993711, ILMN_2960750, ILMN_2511913, ILMN_2609887, ILMN_2833378, ILMN_2930707, ILMN_2833376, ILMN_2938893, ILMN_2736999, ILMN_2933834, ILMN_2748839, ILMN_2895364, ILMN_2976191, ILMN_31…	1454	238	13588	1.2565	1	0.847055	93.9493
GOTERM_BP_FAT	GO:0035239~tube morphogenesis	24	1.16505	0.147284	ILMN_1215252, ILMN_2945275, ILMN_3121255, ILMN_3114585, ILMN_2788283, ILMN_3123303, ILMN_2829646, ILMN_3085841, ILMN_1225565, ILMN_2842137, ILMN_3100042, ILMN_2960750, ILMN_2511913, ILMN_2852034, ILMN_2609887, ILMN_2930707, ILMN_2736999, ILMN_2938893, ILMN_2933834, ILMN_2748839, ILMN_2652749, ILMN_3131909, ILMN_1245731, ILMN_3097868, ILMN_3135566	1454	171	13588	1.31161	1	0.853694	94.4584
GOTERM_BP_FAT	GO:0035148~tube lumen formation	10	0.485437	0.174628	ILMN_2788283, ILMN_2960750, ILMN_2933834, ILMN_2748839, ILMN_2829646, ILMN_3085841, ILMN_2652749, ILMN_3131909, ILMN_3097868, ILMN_3135566	1454	59	13588	1.58394	1	0.884899	96.9335
GOTERM_BP_FAT	GO:0016331~morphogenesis of embryonic epithelium	12	0.582524	0.208356	ILMN_2788283, ILMN_2960750, ILMN_2933834, ILMN_2748839, ILMN_2829646, ILMN_2609887, ILMN_3085841, ILMN_2652749, ILMN_3131909, ILMN_1245731, ILMN_3097868, ILMN_3135566	1454	78	13588	1.43773	1	0.915973	98.5624
GOTERM_BP_FAT	GO:0002009~morphogenesis of an epithelium	23	1.1165	0.224402	ILMN_1215252, ILMN_2511913, ILMN_2960750, ILMN_2609887, ILMN_2930707, ILMN_3114585, ILMN_2788283, ILMN_2736999, ILMN_2933834, ILMN_2748839, ILMN_2829646, ILMN_1257208, ILMN_1225565, ILMN_3085841, ILMN_3131909, ILMN_2976191, ILMN_2652749, ILMN_3097868, ILMN_1245731, ILMN_2842137, ILMN_1230162, ILMN_3100042, ILMN_3135566, ILMN_2993711	1454	173	13588	1.24243	1	0.927549	99.0088
GOTERM_BP_FAT	GO:0060429~epithelium development	33	1.60194	0.301808	ILMN_1215252, ILMN_2820260, ILMN_3121255, ILMN_3114585, ILMN_2615448, ILMN_2788283, ILMN_2668165, ILMN_2829646, ILMN_1257208, ILMN_1228414, ILMN_3085841, ILMN_1225565, ILMN_1216279, ILMN_2953411, ILMN_2842137, ILMN_3100042, ILMN_2993711, ILMN_2960750, ILMN_2511913, ILMN_2609887, ILMN_1229971, ILMN_2930707, ILMN_2938893, ILMN_2736999, ILMN_2933834, ILMN_2748839, ILMN_2976191, ILMN_3131909, ILMN_26…	1454	271	13588	1.13798	1	0.960299	99.8531
GOTERM_BP_FAT	GO:0014020~primary neural tube formation	5	0.242718	0.670897	ILMN_2960750, ILMN_3085841, ILMN_2652749, ILMN_3131909, ILMN_3135566	1454	42	13588	1.11253	1	0.998727	100
GOTERM_BP_FAT	GO:0001843~neural tube closure	4	0.194175	0.802485	ILMN_2960750, ILMN_3085841, ILMN_2652749, ILMN_3135566	1454	39	13588	0.958488	1	0.999853	100
GOTERM_BP_FAT	GO:0060606~tube closure	4	0.194175	0.802485	ILMN_2960750, ILMN_3085841, ILMN_2652749, ILMN_3135566	1454	39	13588	0.958488	1	0.999853	100
Annotation Cluster 127	Enrichment Score: 0.7723725979570016
Category	Term	Count	%	PValue	Genes	List Total	Pop Hits	Pop Total	Fold Enrichment	Bonferroni	Benjamini	FDR
UP_SEQ_FEATURE	domain:BTB	20	0.970874	0.0845203	ILMN_2729197, ILMN_2877464, ILMN_3124947, ILMN_2734334, ILMN_1239815, ILMN_2842767, ILMN_3009948, ILMN_1246018, ILMN_1227043, ILMN_2655869, ILMN_2592779, ILMN_2599955, ILMN_1232592, ILMN_1235687, ILMN_2839682, ILMN_2647313, ILMN_2831579, ILMN_1258406, ILMN_2596117, ILMN_2806291, ILMN_2740646, ILMN_2806290, ILMN_2706567, ILMN_2747456	1937	113	16021	1.4639	1	0.998797	80.6522
INTERPRO	IPR013069:BTB/POZ	19	0.92233	0.126527	ILMN_2860932, ILMN_2729197, ILMN_2877464, ILMN_3124947, ILMN_3085946, ILMN_3077630, ILMN_2842767, ILMN_3009948, ILMN_2824593, ILMN_1246018, ILMN_1227043, ILMN_2592779, ILMN_2599955, ILMN_1232592, ILMN_2839682, ILMN_2654442, ILMN_2647313, ILMN_1258406, ILMN_2806291, ILMN_2806290, ILMN_2706567, ILMN_2747456	1876	128	17763	1.40549	1	0.981028	90.6744
INTERPRO	IPR011333:BTB/POZ fold	25	1.21359	0.137228	ILMN_2860932, ILMN_2729197, ILMN_3124947, ILMN_3085946, ILMN_3077630, ILMN_1239815, ILMN_3009948, ILMN_1246018, ILMN_2655869, ILMN_2592779, ILMN_1232592, ILMN_2839682, ILMN_2831579, ILMN_1258406, ILMN_2596117, ILMN_2740646, ILMN_2877464, ILMN_2734334, ILMN_2842767, ILMN_2824593, ILMN_1227043, ILMN_2995698, ILMN_2599955, ILMN_1235687, ILMN_2647313, ILMN_2654442, ILMN_2806291, ILMN_2806290, ILMN_27…	1876	180	17763	1.31508	1	0.983796	92.4874
SMART	SM00225:BTB	24	1.16505	0.186622	ILMN_2860932, ILMN_2729197, ILMN_3124947, ILMN_3085946, ILMN_3077630, ILMN_1239815, ILMN_3009948, ILMN_1246018, ILMN_2655869, ILMN_2592779, ILMN_1232592, ILMN_2839682, ILMN_2831579, ILMN_1258406, ILMN_2596117, ILMN_2740646, ILMN_2877464, ILMN_2734334, ILMN_2842767, ILMN_2824593, ILMN_1227043, ILMN_2599955, ILMN_1235687, ILMN_2647313, ILMN_2654442, ILMN_2806291, ILMN_2806290, ILMN_2706567, ILMN_27…	960	180	9131	1.26819	1	0.867304	94.0837
INTERPRO	IPR000210:BTB/POZ-like	24	1.16505	0.194204	ILMN_2860932, ILMN_2729197, ILMN_3124947, ILMN_3085946, ILMN_3077630, ILMN_1239815, ILMN_3009948, ILMN_1246018, ILMN_2655869, ILMN_2592779, ILMN_1232592, ILMN_2839682, ILMN_2831579, ILMN_1258406, ILMN_2596117, ILMN_2740646, ILMN_2877464, ILMN_2734334, ILMN_2842767, ILMN_2824593, ILMN_1227043, ILMN_2599955, ILMN_1235687, ILMN_2647313, ILMN_2654442, ILMN_2806291, ILMN_2806290, ILMN_2706567, ILMN_27…	1876	180	17763	1.26247	1	0.99436	97.733
INTERPRO	IPR013089:Kelch related	12	0.582524	0.270275	ILMN_2877464, ILMN_3077630, ILMN_2824593, ILMN_1227043, ILMN_1246018, ILMN_2592779, ILMN_2599955, ILMN_2839682, ILMN_2647313, ILMN_2654442, ILMN_1258406, ILMN_2806291, ILMN_2806290, ILMN_2747456, ILMN_2706567	1876	84	17763	1.35265	1	0.998138	99.6017
INTERPRO	IPR011705:BTB/Kelch-associated	8	0.38835	0.272759	ILMN_2592779, ILMN_3077630, ILMN_2654442, ILMN_2647313, ILMN_2824593, ILMN_1258406, ILMN_1246018, ILMN_2806291, ILMN_2806290, ILMN_2747456	1876	50	17763	1.51497	1	0.998165	99.6248
Annotation Cluster 128	Enrichment Score: 0.7674128282222169
Category	Term	Count	%	PValue	Genes	List Total	Pop Hits	Pop Total	Fold Enrichment	Bonferroni	Benjamini	FDR
INTERPRO	IPR017975:Tubulin, conserved site	6	0.291262	0.101717	ILMN_2464999, ILMN_2464061, ILMN_2588051, ILMN_1227164, ILMN_2420070, ILMN_2517170	1876	24	17763	2.36714	1	0.970897	84.7596
PIR_SUPERFAMILY	PIRSF002306:tubulin	5	0.242718	0.126767	ILMN_2464061, ILMN_2588051, ILMN_1227164, ILMN_2420070, ILMN_2517170	801	20	8136	2.53933	1	1	87.9697
INTERPRO	IPR000217:Tubulin	5	0.242718	0.15346	ILMN_2464061, ILMN_2588051, ILMN_1227164, ILMN_2420070, ILMN_2517170	1876	20	17763	2.36714	1	0.988828	94.6156
INTERPRO	IPR003008:Tubulin/FtsZ, GTPase domain	5	0.242718	0.15346	ILMN_2464061, ILMN_2588051, ILMN_1227164, ILMN_2420070, ILMN_2517170	1876	20	17763	2.36714	1	0.988828	94.6156
GOTERM_BP_FAT	GO:0051258~protein polymerization	7	0.339806	0.252205	ILMN_2972459, ILMN_2464061, ILMN_2588051, ILMN_1227164, ILMN_2914510, ILMN_2420070, ILMN_2517170	1454	40	13588	1.63542	1	0.941496	99.4891
INTERPRO	IPR018316:Tubulin/FtsZ, 2-layer sandwich domain	4	0.194175	0.324623	ILMN_2588051, ILMN_1227164, ILMN_2420070, ILMN_2517170	1876	19	17763	1.99338	1	0.999093	99.8975
Annotation Cluster 129	Enrichment Score: 0.7491922643121894
Category	Term	Count	%	PValue	Genes	List Total	Pop Hits	Pop Total	Fold Enrichment	Bonferroni	Benjamini	FDR
INTERPRO	IPR017855:SMAD domain-like	5	0.242718	0.0802677	ILMN_3155789, ILMN_2938893, ILMN_1228414, ILMN_1229320, ILMN_2695883, ILMN_1216279	1876	16	17763	2.95892	1	0.955119	76.9473
SMART	SM00523:DWA	4	0.194175	0.123916	ILMN_3155789, ILMN_2938893, ILMN_1218384, ILMN_1228414	960	12	9131	3.17049	1	0.833215	83.649
INTERPRO	IPR003619:MAD homology 1, Dwarfin-type	4	0.194175	0.125401	ILMN_3155789, ILMN_2938893, ILMN_1218384, ILMN_1228414	1876	12	17763	3.15618	1	0.981242	90.4613
GOTERM_BP_FAT	GO:0007179~transforming growth factor beta receptor signaling pathway	9	0.436893	0.135323	ILMN_3155789, ILMN_2938893, ILMN_2466845, ILMN_2697060, ILMN_2783429, ILMN_2705324, ILMN_1228414, ILMN_2829262, ILMN_2618714, ILMN_2767996, ILMN_2590034	1454	48	13588	1.75224	1	0.838298	92.8637
SMART	SM00524:DWB	3	0.145631	0.201931	ILMN_3155789, ILMN_2938893, ILMN_1228414	960	8	9131	3.5668	1	0.869427	95.4387
INTERPRO	IPR013790:Dwarfin	3	0.145631	0.203555	ILMN_3155789, ILMN_2938893, ILMN_1228414	1876	8	17763	3.55071	1	0.994994	98.1527
INTERPRO	IPR001132:SMAD domain, Dwarfin-type	3	0.145631	0.203555	ILMN_3155789, ILMN_2938893, ILMN_1228414	1876	8	17763	3.55071	1	0.994994	98.1527
INTERPRO	IPR013019:MAD homology, MH1	3	0.145631	0.203555	ILMN_3155789, ILMN_2938893, ILMN_1228414	1876	8	17763	3.55071	1	0.994994	98.1527
UP_SEQ_FEATURE	domain:MH1	3	0.145631	0.250649	ILMN_3155789, ILMN_2938893, ILMN_1228414	1937	8	16021	3.10164	1	0.999996	99.5333
UP_SEQ_FEATURE	domain:MH2	3	0.145631	0.250649	ILMN_3155789, ILMN_2938893, ILMN_1228414	1937	8	16021	3.10164	1	0.999996	99.5333
GOTERM_BP_FAT	GO:0009880~embryonic pattern specification	6	0.291262	0.317809	ILMN_3155789, ILMN_2938893, ILMN_3109289, ILMN_1228414, ILMN_2609887, ILMN_2993711	1454	35	13588	1.60204	1	0.964944	99.9036
Annotation Cluster 130	Enrichment Score: 0.7481734328758067
Category	Term	Count	%	PValue	Genes	List Total	Pop Hits	Pop Total	Fold Enrichment	Bonferroni	Benjamini	FDR
GOTERM_MF_FAT	GO:0004428~inositol or phosphatidylinositol kinase activity	8	0.38835	0.0657799	ILMN_2732317, ILMN_2723920, ILMN_1231996, ILMN_2609412, ILMN_2689259, ILMN_2648200, ILMN_2838372, ILMN_2757838	1385	35	13288	2.19297	1	0.613583	66.2132
KEGG_PATHWAY	mmu04070:Phosphatidylinositol signaling system	14	0.679612	0.0709115	ILMN_2732317, ILMN_2972541, ILMN_2933431, ILMN_2723920, ILMN_2609412, ILMN_1231996, ILMN_2689259, ILMN_2620913, ILMN_1215681, ILMN_1215550, ILMN_2915059, ILMN_1226157, ILMN_2637953, ILMN_1239607, ILMN_1217890, ILMN_2757838	643	75	5738	1.66578	0.999998	0.252436	59.5165
KEGG_PATHWAY	mmu00562:Inositol phosphate metabolism	8	0.38835	0.400581	ILMN_2723920, ILMN_2933431, ILMN_2637953, ILMN_1231996, ILMN_2609412, ILMN_2689259, ILMN_2620913, ILMN_1215550, ILMN_2757838	643	54	5738	1.32204	1	0.666324	99.8149
GOTERM_MF_FAT	GO:0001727~lipid kinase activity	4	0.194175	0.544259	ILMN_2732317, ILMN_1231996, ILMN_2609412, ILMN_2689259	1385	27	13288	1.42137	1	0.991118	99.9996
Annotation Cluster 131	Enrichment Score: 0.7475599701404904
Category	Term	Count	%	PValue	Genes	List Total	Pop Hits	Pop Total	Fold Enrichment	Bonferroni	Benjamini	FDR
GOTERM_BP_FAT	GO:0000165~MAPKKK cascade	20	0.970874	0.0330987	ILMN_2920549, ILMN_2511913, ILMN_2792268, ILMN_2740852, ILMN_2828877, ILMN_2792267, ILMN_2592823, ILMN_2649828, ILMN_1245874, ILMN_1213055, ILMN_2639375, ILMN_2832641, ILMN_3028981, ILMN_2873793, ILMN_2591066, ILMN_1257208, ILMN_3123303, ILMN_1217890, ILMN_2601071, ILMN_3112011, ILMN_2957070, ILMN_2743723, ILMN_2993711, ILMN_1232458	1454	114	13588	1.63952	1	0.508963	45.7265
GOTERM_BP_FAT	GO:0043549~regulation of kinase activity	30	1.45631	0.0350165	ILMN_2616262, ILMN_2972541, ILMN_2937738, ILMN_2851889, ILMN_2937735, ILMN_2792268, ILMN_2792267, ILMN_2851888, ILMN_2740852, ILMN_2828877, ILMN_2655204, ILMN_1245874, ILMN_2620053, ILMN_1216689, ILMN_2915059, ILMN_2659616, ILMN_3123303, ILMN_2722184, ILMN_1217890, ILMN_2756460, ILMN_2957070, ILMN_1238736, ILMN_2743723, ILMN_2993711, ILMN_1232458, ILMN_2941992, ILMN_2872599, ILMN_2946862, ILMN_12…	1454	192	13588	1.4602	1	0.524539	47.6482
GOTERM_BP_FAT	GO:0051338~regulation of transferase activity	30	1.45631	0.0521295	ILMN_2616262, ILMN_2972541, ILMN_2937738, ILMN_2851889, ILMN_2937735, ILMN_2792268, ILMN_2792267, ILMN_2851888, ILMN_2740852, ILMN_2828877, ILMN_2655204, ILMN_1245874, ILMN_2620053, ILMN_1216689, ILMN_2915059, ILMN_2659616, ILMN_3123303, ILMN_2722184, ILMN_1217890, ILMN_2756460, ILMN_2957070, ILMN_1238736, ILMN_2743723, ILMN_2993711, ILMN_1232458, ILMN_2941992, ILMN_2872599, ILMN_2946862, ILMN_12…	1454	199	13588	1.40883	1	0.613655	62.1698
GOTERM_BP_FAT	GO:0042325~regulation of phosphorylation	41	1.99029	0.055228	ILMN_2616262, ILMN_2851889, ILMN_2740852, ILMN_2851888, ILMN_2828877, ILMN_2709397, ILMN_2620053, ILMN_3123303, ILMN_1257208, ILMN_1235481, ILMN_1217890, ILMN_2756460, ILMN_1238736, ILMN_1234521, ILMN_2993711, ILMN_2933431, ILMN_2946862, ILMN_2873793, ILMN_2906471, ILMN_2630423, ILMN_2679619, ILMN_2906473, ILMN_3135566, ILMN_1215252, ILMN_2937738, ILMN_2972541, ILMN_2937735, ILMN_2792268, ILMN_27…	1454	290	13588	1.32123	1	0.623554	64.3533
GOTERM_BP_FAT	GO:0019220~regulation of phosphate metabolic process	42	2.03883	0.0620029	ILMN_2616262, ILMN_2851889, ILMN_2740852, ILMN_2851888, ILMN_2828877, ILMN_2709397, ILMN_2620053, ILMN_3123303, ILMN_1257208, ILMN_1235481, ILMN_1217890, ILMN_2756460, ILMN_1238736, ILMN_1234521, ILMN_2993711, ILMN_2933431, ILMN_2946862, ILMN_2873793, ILMN_2906471, ILMN_2630423, ILMN_2679619, ILMN_2906473, ILMN_3135566, ILMN_1215252, ILMN_2972541, ILMN_2937738, ILMN_2937735, ILMN_2792268, ILMN_27…	1454	301	13588	1.30399	1	0.653969	68.7197
GOTERM_BP_FAT	GO:0051174~regulation of phosphorus metabolic process	42	2.03883	0.0620029	ILMN_2616262, ILMN_2851889, ILMN_2740852, ILMN_2851888, ILMN_2828877, ILMN_2709397, ILMN_2620053, ILMN_3123303, ILMN_1257208, ILMN_1235481, ILMN_1217890, ILMN_2756460, ILMN_1238736, ILMN_1234521, ILMN_2993711, ILMN_2933431, ILMN_2946862, ILMN_2873793, ILMN_2906471, ILMN_2630423, ILMN_2679619, ILMN_2906473, ILMN_3135566, ILMN_1215252, ILMN_2972541, ILMN_2937738, ILMN_2937735, ILMN_2792268, ILMN_27…	1454	301	13588	1.30399	1	0.653969	68.7197
GOTERM_BP_FAT	GO:0045859~regulation of protein kinase activity	27	1.31068	0.0933413	ILMN_2616262, ILMN_2972541, ILMN_2937738, ILMN_2851889, ILMN_2937735, ILMN_2792268, ILMN_2851888, ILMN_2740852, ILMN_2828877, ILMN_2792267, ILMN_2655204, ILMN_1245874, ILMN_2620053, ILMN_1216689, ILMN_2915059, ILMN_3123303, ILMN_2722184, ILMN_1217890, ILMN_2756460, ILMN_2957070, ILMN_2743723, ILMN_2993711, ILMN_1232458, ILMN_2941992, ILMN_2872599, ILMN_1216072, ILMN_2873793, ILMN_1239607, ILMN_26…	1454	186	13588	1.35657	1	0.752313	83.122
GOTERM_BP_FAT	GO:0033674~positive regulation of kinase activity	18	0.873786	0.224224	ILMN_2972541, ILMN_2937738, ILMN_2792268, ILMN_2937735, ILMN_2740852, ILMN_2828877, ILMN_2792267, ILMN_1245874, ILMN_2620053, ILMN_2946862, ILMN_2915059, ILMN_2659616, ILMN_2873793, ILMN_1239607, ILMN_3123303, ILMN_2630423, ILMN_1216721, ILMN_2957070, ILMN_2743723, ILMN_1238736, ILMN_2993711, ILMN_1232458	1454	130	13588	1.29396	1	0.927984	99.0047
GOTERM_BP_FAT	GO:0051347~positive regulation of transferase activity	18	0.873786	0.273722	ILMN_2972541, ILMN_2937738, ILMN_2792268, ILMN_2937735, ILMN_2740852, ILMN_2828877, ILMN_2792267, ILMN_1245874, ILMN_2620053, ILMN_2946862, ILMN_2915059, ILMN_2659616, ILMN_2873793, ILMN_1239607, ILMN_3123303, ILMN_2630423, ILMN_1216721, ILMN_2957070, ILMN_2743723, ILMN_1238736, ILMN_2993711, ILMN_1232458	1454	135	13588	1.24603	1	0.950066	99.6993
GOTERM_BP_FAT	GO:0000187~activation of MAPK activity	7	0.339806	0.448029	ILMN_3123303, ILMN_2792268, ILMN_2792267, ILMN_2828877, ILMN_1245874, ILMN_2957070, ILMN_2743723, ILMN_2993711, ILMN_1232458	1454	50	13588	1.30834	1	0.989687	99.9979
GOTERM_BP_FAT	GO:0045860~positive regulation of protein kinase activity	15	0.728155	0.457098	ILMN_2972541, ILMN_2937738, ILMN_2792268, ILMN_2937735, ILMN_2740852, ILMN_2828877, ILMN_2792267, ILMN_1245874, ILMN_2620053, ILMN_2915059, ILMN_2873793, ILMN_1239607, ILMN_3123303, ILMN_2630423, ILMN_1216721, ILMN_2957070, ILMN_2743723, ILMN_2993711, ILMN_1232458	1454	124	13588	1.13047	1	0.990301	99.9985
GOTERM_BP_FAT	GO:0044093~positive regulation of molecular function	34	1.65049	0.507148	ILMN_2972541, ILMN_2937738, ILMN_2792268, ILMN_2937735, ILMN_2705324, ILMN_2739295, ILMN_2847004, ILMN_2792267, ILMN_2828877, ILMN_2740852, ILMN_1245874, ILMN_2620053, ILMN_1221981, ILMN_1215681, ILMN_2915059, ILMN_2633333, ILMN_2659616, ILMN_3123303, ILMN_2957070, ILMN_1238736, ILMN_2743723, ILMN_2993711, ILMN_1232458, ILMN_2941992, ILMN_2466845, ILMN_2690620, ILMN_2589556, ILMN_2837476, ILMN_27…	1454	306	13588	1.03836	1	0.993731	99.9997
GOTERM_BP_FAT	GO:0043085~positive regulation of catalytic activity	29	1.40777	0.522844	ILMN_2972541, ILMN_2937738, ILMN_2937735, ILMN_2739295, ILMN_2792268, ILMN_2847004, ILMN_2792267, ILMN_2740852, ILMN_2828877, ILMN_1245874, ILMN_2620053, ILMN_1221981, ILMN_2915059, ILMN_2659616, ILMN_3123303, ILMN_2957070, ILMN_1238736, ILMN_2743723, ILMN_2993711, ILMN_1232458, ILMN_2941992, ILMN_2466845, ILMN_2690620, ILMN_2837476, ILMN_2791578, ILMN_2946862, ILMN_1227863, ILMN_2873793, ILMN_12…	1454	261	13588	1.03836	1	0.994485	99.9999
GOTERM_BP_FAT	GO:0043406~positive regulation of MAP kinase activity	7	0.339806	0.614318	ILMN_3123303, ILMN_2792268, ILMN_2792267, ILMN_2828877, ILMN_1245874, ILMN_2957070, ILMN_2743723, ILMN_2993711, ILMN_1232458	1454	59	13588	1.10876	1	0.997532	100
GOTERM_BP_FAT	GO:0032147~activation of protein kinase activity	6	0.291262	0.648657	ILMN_2972541, ILMN_2937738, ILMN_1239607, ILMN_2873793, ILMN_2937735, ILMN_2740852, ILMN_2630423, ILMN_2915059	1454	51	13588	1.09944	1	0.998326	100
GOTERM_BP_FAT	GO:0043405~regulation of MAP kinase activity	9	0.436893	0.688007	ILMN_3123303, ILMN_2792268, ILMN_2792267, ILMN_2828877, ILMN_1217890, ILMN_1245874, ILMN_3112011, ILMN_2957070, ILMN_2743723, ILMN_2993711, ILMN_1232458	1454	84	13588	1.00128	1	0.999002	100
Annotation Cluster 132	Enrichment Score: 0.7437837860242826
Category	Term	Count	%	PValue	Genes	List Total	Pop Hits	Pop Total	Fold Enrichment	Bonferroni	Benjamini	FDR
GOTERM_BP_FAT	GO:0051726~regulation of cell cycle	30	1.45631	0.107649	ILMN_2610835, ILMN_2933993, ILMN_2655204, ILMN_1245874, ILMN_2907878, ILMN_3074516, ILMN_2727893, ILMN_2711570, ILMN_2893077, ILMN_1254154, ILMN_2717727, ILMN_2420070, ILMN_2837156, ILMN_2901402, ILMN_3100042, ILMN_2743723, ILMN_2466845, ILMN_2667889, ILMN_1250774, ILMN_1230273, ILMN_2732689, ILMN_2850753, ILMN_1254374, ILMN_1223624, ILMN_3047301, ILMN_2629971, ILMN_2946862, ILMN_1216072, ILMN_26…	1454	214	13588	1.31008	1	0.791311	87.3558
GOTERM_BP_FAT	GO:0010948~negative regulation of cell cycle process	5	0.242718	0.118429	ILMN_2667889, ILMN_1221616, ILMN_2655204, ILMN_2901402, ILMN_3074516, ILMN_2669087	1454	18	13588	2.5959	1	0.811783	89.8597
GOTERM_BP_FAT	GO:0007346~regulation of mitotic cell cycle	15	0.728155	0.142494	ILMN_2667889, ILMN_2466845, ILMN_1250774, ILMN_2850753, ILMN_2655204, ILMN_3047301, ILMN_3074516, ILMN_2727893, ILMN_2946862, ILMN_2669087, ILMN_2893077, ILMN_1254154, ILMN_2717727, ILMN_1221616, ILMN_2976191, ILMN_2420070, ILMN_2901402	1454	96	13588	1.4602	1	0.847803	93.8651
GOTERM_BP_FAT	GO:0045841~negative regulation of mitotic metaphase/anaphase transition	3	0.145631	0.167107	ILMN_1221616, ILMN_2655204, ILMN_3074516, ILMN_2669087	1454	7	13588	4.00511	1	0.877089	96.3846
GOTERM_BP_FAT	GO:0007094~mitotic cell cycle spindle assembly checkpoint	3	0.145631	0.167107	ILMN_1221616, ILMN_2655204, ILMN_3074516, ILMN_2669087	1454	7	13588	4.00511	1	0.877089	96.3846
GOTERM_BP_FAT	GO:0045786~negative regulation of cell cycle	8	0.38835	0.170539	ILMN_2667889, ILMN_1221616, ILMN_1216721, ILMN_2679619, ILMN_2655204, ILMN_2901402, ILMN_3074516, ILMN_2727893, ILMN_2669087	1454	43	13588	1.73865	1	0.88188	96.6457
GOTERM_BP_FAT	GO:0051783~regulation of nuclear division	7	0.339806	0.181395	ILMN_1254154, ILMN_2717727, ILMN_1221616, ILMN_2655204, ILMN_2420070, ILMN_2946862, ILMN_3074516, ILMN_2669087	1454	36	13588	1.81713	1	0.892618	97.3593
GOTERM_BP_FAT	GO:0007088~regulation of mitosis	7	0.339806	0.181395	ILMN_1254154, ILMN_2717727, ILMN_1221616, ILMN_2655204, ILMN_2420070, ILMN_2946862, ILMN_3074516, ILMN_2669087	1454	36	13588	1.81713	1	0.892618	97.3593
GOTERM_BP_FAT	GO:0051784~negative regulation of nuclear division	3	0.145631	0.207722	ILMN_1221616, ILMN_2655204, ILMN_3074516, ILMN_2669087	1454	8	13588	3.50447	1	0.915942	98.5413
GOTERM_BP_FAT	GO:0045839~negative regulation of mitosis	3	0.145631	0.207722	ILMN_1221616, ILMN_2655204, ILMN_3074516, ILMN_2669087	1454	8	13588	3.50447	1	0.915942	98.5413
GOTERM_BP_FAT	GO:0031577~spindle checkpoint	3	0.145631	0.207722	ILMN_1221616, ILMN_2655204, ILMN_3074516, ILMN_2669087	1454	8	13588	3.50447	1	0.915942	98.5413
GOTERM_BP_FAT	GO:0030071~regulation of mitotic metaphase/anaphase transition	4	0.194175	0.240817	ILMN_2717727, ILMN_1221616, ILMN_2655204, ILMN_3074516, ILMN_2669087	1454	16	13588	2.33631	1	0.936562	99.3278
GOTERM_BP_FAT	GO:0010564~regulation of cell cycle process	11	0.533981	0.25068	ILMN_2667889, ILMN_1254374, ILMN_2655204, ILMN_2629971, ILMN_2727893, ILMN_3074516, ILMN_2946862, ILMN_2669087, ILMN_1254154, ILMN_2717727, ILMN_1221616, ILMN_2420070, ILMN_2901402, ILMN_2962747	1454	73	13588	1.40819	1	0.941839	99.4699
GOTERM_BP_FAT	GO:0007093~mitotic cell cycle checkpoint	5	0.242718	0.250868	ILMN_2893077, ILMN_2466845, ILMN_1221616, ILMN_2655204, ILMN_3074516, ILMN_2669087	1454	24	13588	1.94693	1	0.941478	99.4723
Annotation Cluster 133	Enrichment Score: 0.7371624237693128
Category	Term	Count	%	PValue	Genes	List Total	Pop Hits	Pop Total	Fold Enrichment	Bonferroni	Benjamini	FDR
SMART	SM00568:GRAM	5	0.242718	0.112577	ILMN_2688569, ILMN_1228165, ILMN_1225324, ILMN_2756439, ILMN_3139818, ILMN_1251220	960	18	9131	2.64207	1	0.813929	80.5019
INTERPRO	IPR004182:GRAM	5	0.242718	0.114268	ILMN_2688569, ILMN_1228165, ILMN_1225324, ILMN_2756439, ILMN_3139818, ILMN_1251220	1876	18	17763	2.63015	1	0.976272	88.0924
UP_SEQ_FEATURE	domain:GRAM	3	0.145631	0.47768	ILMN_2688569, ILMN_1225324, ILMN_2756439, ILMN_3139818	1937	13	16021	1.9087	1	1	99.9994
Annotation Cluster 134	Enrichment Score: 0.7359521774249129
Category	Term	Count	%	PValue	Genes	List Total	Pop Hits	Pop Total	Fold Enrichment	Bonferroni	Benjamini	FDR
UP_SEQ_FEATURE	domain:Nudix hydrolase	6	0.291262	0.156049	ILMN_1227723, ILMN_2746906, ILMN_1244214, ILMN_1213725, ILMN_1259148, ILMN_2880623	1937	24	16021	2.06776	1	0.999935	95.7397
INTERPRO	IPR000086:NUDIX hydrolase, core	5	0.242718	0.174706	ILMN_2746906, ILMN_1244214, ILMN_1213725, ILMN_1259148, ILMN_2880623	1876	21	17763	2.25442	1	0.992565	96.5522
UP_SEQ_FEATURE	short sequence motif:Nudix box	5	0.242718	0.189893	ILMN_2746906, ILMN_1244214, ILMN_1213725, ILMN_1259148, ILMN_2880623	1937	19	16021	2.17659	1	0.999981	98.0102
INTERPRO	IPR000086:NUDIX hydrolase domain	5	0.242718	0.219844	ILMN_2746906, ILMN_1244214, ILMN_1213725, ILMN_1259148, ILMN_2880623	1876	23	17763	2.05838	1	0.99635	98.7143
Annotation Cluster 135	Enrichment Score: 0.7336802430471944
Category	Term	Count	%	PValue	Genes	List Total	Pop Hits	Pop Total	Fold Enrichment	Bonferroni	Benjamini	FDR
UP_SEQ_FEATURE	domain:NTF2	3	0.145631	0.157422	ILMN_2677092, ILMN_3114413, ILMN_2774825	1937	6	16021	4.13552	1	0.999932	95.8668
INTERPRO	IPR002075:Nuclear transport factor 2	3	0.145631	0.163613	ILMN_2677092, ILMN_3114413, ILMN_2774825	1876	7	17763	4.05795	1	0.990543	95.6425
INTERPRO	IPR018222:Nuclear transport factor 2, Eukaryote	3	0.145631	0.244387	ILMN_2677092, ILMN_3114413, ILMN_2774825	1876	9	17763	3.15618	1	0.997225	99.266
Annotation Cluster 136	Enrichment Score: 0.7280982825773589
Category	Term	Count	%	PValue	Genes	List Total	Pop Hits	Pop Total	Fold Enrichment	Bonferroni	Benjamini	FDR
UP_SEQ_FEATURE	metal ion-binding site:Magnesium; via carbonyl oxygen	6	0.291262	0.0845934	ILMN_2628892, ILMN_2632489, ILMN_1245079, ILMN_1252214, ILMN_2603081, ILMN_2714397, ILMN_3130055, ILMN_1213307, ILMN_2863264	1937	20	16021	2.48131	1	0.998646	80.6809
INTERPRO	IPR011948:Dullard-like phosphatase domain	3	0.145631	0.0896844	ILMN_2632489, ILMN_2714397, ILMN_3130055, ILMN_1213307, ILMN_2863264	1876	5	17763	5.68113	1	0.964186	80.7541
SMART	SM00577:CPDc	3	0.145631	0.201931	ILMN_2632489, ILMN_2714397, ILMN_3130055, ILMN_1213307, ILMN_2863264	960	8	9131	3.5668	1	0.869427	95.4387
UP_SEQ_FEATURE	active site:4-aspartylphosphate intermediate	7	0.339806	0.202073	ILMN_2632489, ILMN_3002875, ILMN_1250382, ILMN_2714397, ILMN_3130055, ILMN_2977129, ILMN_1213307, ILMN_2863264, ILMN_2629528	1937	33	16021	1.75446	1	0.99998	98.4988
INTERPRO	IPR004274:NLI interacting factor	3	0.145631	0.203555	ILMN_2632489, ILMN_2714397, ILMN_3130055, ILMN_1213307, ILMN_2863264	1876	8	17763	3.55071	1	0.994994	98.1527
UP_SEQ_FEATURE	domain:FCP1 homology	3	0.145631	0.250649	ILMN_2632489, ILMN_2714397, ILMN_3130055, ILMN_1213307, ILMN_2863264	1937	8	16021	3.10164	1	0.999996	99.5333
UP_SEQ_FEATURE	site:Transition state stabilizer	4	0.194175	0.506758	ILMN_2733179, ILMN_2632489, ILMN_2714397, ILMN_3130055, ILMN_1213307, ILMN_2863264	1937	22	16021	1.50383	1	1	99.9998
Annotation Cluster 137	Enrichment Score: 0.7242196494179315
Category	Term	Count	%	PValue	Genes	List Total	Pop Hits	Pop Total	Fold Enrichment	Bonferroni	Benjamini	FDR
BIOCARTA	m_fasPathway:FAS signaling pathway ( CD95 )	8	0.38835	0.100946	ILMN_2920549, ILMN_2669404, ILMN_2621385, ILMN_2971744, ILMN_3121891, ILMN_1222228, ILMN_2679619, ILMN_2718815, ILMN_2648548, ILMN_3097868	166	29	1171	1.94599	1	0.674582	73.9577
BIOCARTA	m_HivnefPathway:HIV-I Nef: negative effector of Fas and TNF	12	0.582524	0.101709	ILMN_2971744, ILMN_2621385, ILMN_1250774, ILMN_2753492, ILMN_3121891, ILMN_2850753, ILMN_1222228, ILMN_2990616, ILMN_2592476, ILMN_3028981, ILMN_2669404, ILMN_2615901, ILMN_2679619, ILMN_3097868, ILMN_2648548	166	52	1171	1.6279	1	0.659631	74.2361
BIOCARTA	m_caspasePathway:Caspase Cascade in Apoptosis	6	0.291262	0.162186	ILMN_2669404, ILMN_2621385, ILMN_2971744, ILMN_3121891, ILMN_1222228, ILMN_2990616, ILMN_2648548, ILMN_3097868	166	21	1171	2.01549	1	0.724049	89.3268
BIOCARTA	m_tnfr1Pathway:TNFR1 Signaling Pathway	7	0.339806	0.23889	ILMN_2920549, ILMN_2669404, ILMN_2621385, ILMN_2971744, ILMN_2753492, ILMN_3121891, ILMN_1222228, ILMN_2679619, ILMN_3097868	166	30	1171	1.64598	1	0.816229	96.8301
BIOCARTA	m_deathPathway:Induction of apoptosis through DR3 and DR4/5 Death Receptors	5	0.242718	0.601507	ILMN_2753492, ILMN_3121891, ILMN_2648548, ILMN_3097868, ILMN_2592476	166	29	1171	1.21624	1	0.962761	99.9991
Annotation Cluster 138	Enrichment Score: 0.7161040398084118
Category	Term	Count	%	PValue	Genes	List Total	Pop Hits	Pop Total	Fold Enrichment	Bonferroni	Benjamini	FDR
GOTERM_BP_FAT	GO:0002286~T cell activation during immune response	5	0.242718	0.0543544	ILMN_2749717, ILMN_2941992, ILMN_2893077, ILMN_2466845, ILMN_1216871	1454	14	13588	3.33759	1	0.621455	63.75
GOTERM_BP_FAT	GO:0002285~lymphocyte activation during immune response	5	0.242718	0.137986	ILMN_2749717, ILMN_2941992, ILMN_2893077, ILMN_2466845, ILMN_1216871	1454	19	13588	2.45928	1	0.842186	93.2524
GOTERM_BP_FAT	GO:0002366~leukocyte activation during immune response	5	0.242718	0.426832	ILMN_2749717, ILMN_2941992, ILMN_2893077, ILMN_2466845, ILMN_1216871	1454	31	13588	1.5073	1	0.987047	99.9959
GOTERM_BP_FAT	GO:0002263~cell activation during immune response	5	0.242718	0.426832	ILMN_2749717, ILMN_2941992, ILMN_2893077, ILMN_2466845, ILMN_1216871	1454	31	13588	1.5073	1	0.987047	99.9959
Annotation Cluster 139	Enrichment Score: 0.7085291677279303
Category	Term	Count	%	PValue	Genes	List Total	Pop Hits	Pop Total	Fold Enrichment	Bonferroni	Benjamini	FDR
KEGG_PATHWAY	mmu04622:RIG-I-like receptor signaling pathway	13	0.631068	0.0722225	ILMN_2960750, ILMN_2753492, ILMN_2660438, ILMN_2845312, ILMN_2724570, ILMN_2589556, ILMN_2592476, ILMN_3144289, ILMN_2591066, ILMN_2596961, ILMN_2439638, ILMN_2630423, ILMN_1229320, ILMN_3097868	643	68	5738	1.70602	0.999998	0.251793	60.2133
BIOCARTA	m_tnfr2Pathway:TNFR2 Signaling Pathway	6	0.291262	0.0781313	ILMN_2660438, ILMN_2753492, ILMN_2439638, ILMN_2630423, ILMN_2589556, ILMN_3144289, ILMN_2592476	166	17	1171	2.48972	1	0.681572	64.2494
BIOCARTA	m_cd40Pathway:CD40L Signaling Pathway	5	0.242718	0.0974066	ILMN_2960750, ILMN_2439638, ILMN_2630423, ILMN_2589556, ILMN_3144289, ILMN_2592476	166	13	1171	2.71316	1	0.679573	72.6314
BIOCARTA	m_stressPathway:TNF/Stress Related Signaling	7	0.339806	0.127468	ILMN_2920549, ILMN_2660438, ILMN_2753492, ILMN_2630423, ILMN_1213030, ILMN_2589556, ILMN_2592476	166	25	1171	1.97518	1	0.683631	82.166
KEGG_PATHWAY	mmu04621:NOD-like receptor signaling pathway	11	0.533981	0.149482	ILMN_2960750, ILMN_1238221, ILMN_2649828, ILMN_2724570, ILMN_1213055, ILMN_2990616, ILMN_2589556, ILMN_2592476, ILMN_2591066, ILMN_2601071, ILMN_2630423, ILMN_3097868, ILMN_2824022	643	62	5738	1.58325	1	0.402285	86.3386
BIOCARTA	m_RELAPathway:Acetylation and Deacetylation of RelA in The Nucleus	4	0.194175	0.314518	ILMN_2960750, ILMN_2753492, ILMN_2589556, ILMN_2592476	166	14	1171	2.01549	1	0.850005	99.1559
BIOCARTA	m_nfkbPathway:NF-kB Signaling Pathway	5	0.242718	0.34202	ILMN_2960750, ILMN_2753492, ILMN_2630423, ILMN_2589556, ILMN_2592476	166	21	1171	1.67958	1	0.871775	99.4971
KEGG_PATHWAY	mmu04623:Cytosolic DNA-sensing pathway	8	0.38835	0.419727	ILMN_2753492, ILMN_2596961, ILMN_2845312, ILMN_2630423, ILMN_1229320, ILMN_2680066, ILMN_2589556, ILMN_2634720, ILMN_2592476	643	55	5738	1.29801	1	0.680097	99.8758
BIOCARTA	m_il1rPathway:Signal transduction through IL1R	3	0.145631	0.888171	ILMN_2960750, ILMN_2589556, ILMN_2592476	166	25	1171	0.846506	1	0.998063	100
Annotation Cluster 140	Enrichment Score: 0.7000822004782445
Category	Term	Count	%	PValue	Genes	List Total	Pop Hits	Pop Total	Fold Enrichment	Bonferroni	Benjamini	FDR
GOTERM_BP_FAT	GO:0045637~regulation of myeloid cell differentiation	10	0.485437	0.0892877	ILMN_3157483, ILMN_2722184, ILMN_2912872, ILMN_2852034, ILMN_2945275, ILMN_2872599, ILMN_2679619, ILMN_2655204, ILMN_2976191, ILMN_2695964, ILMN_2679755	1454	51	13588	1.8324	1	0.742297	81.6981
GOTERM_BP_FAT	GO:0045639~positive regulation of myeloid cell differentiation	6	0.291262	0.12155	ILMN_3157483, ILMN_2722184, ILMN_2852034, ILMN_2872599, ILMN_2679619, ILMN_2976191, ILMN_2695964	1454	25	13588	2.24286	1	0.817899	90.4921
GOTERM_BP_FAT	GO:0045646~regulation of erythrocyte differentiation	4	0.194175	0.129112	ILMN_3157483, ILMN_2722184, ILMN_2852034, ILMN_2872599, ILMN_2976191	1454	12	13588	3.11508	1	0.827885	91.8733
GOTERM_BP_FAT	GO:0045648~positive regulation of erythrocyte differentiation	3	0.145631	0.207722	ILMN_3157483, ILMN_2722184, ILMN_2852034, ILMN_2872599	1454	8	13588	3.50447	1	0.915942	98.5413
GOTERM_BP_FAT	GO:0032844~regulation of homeostatic process	9	0.436893	0.309661	ILMN_3157483, ILMN_2740852, ILMN_2722184, ILMN_2852034, ILMN_2594718, ILMN_2872599, ILMN_2976191, ILMN_2996479, ILMN_3121255, ILMN_2776025	1454	60	13588	1.40179	1	0.962797	99.8804
GOTERM_BP_FAT	GO:0045597~positive regulation of cell differentiation	18	0.873786	0.699238	ILMN_1215252, ILMN_3157483, ILMN_2852034, ILMN_2768330, ILMN_2872599, ILMN_2655204, ILMN_2937596, ILMN_2986978, ILMN_2837476, ILMN_3155789, ILMN_1257208, ILMN_1228414, ILMN_2660233, ILMN_2953301, ILMN_2722184, ILMN_2679619, ILMN_2976191, ILMN_2637757, ILMN_2934534, ILMN_2695964	1454	175	13588	0.961226	1	0.999121	100
Annotation Cluster 141	Enrichment Score: 0.6966485997596843
Category	Term	Count	%	PValue	Genes	List Total	Pop Hits	Pop Total	Fold Enrichment	Bonferroni	Benjamini	FDR
KEGG_PATHWAY	mmu04540:Gap junction	15	0.728155	0.094966	ILMN_2588051, ILMN_1217408, ILMN_1227164, ILMN_2847004, ILMN_2649828, ILMN_2618714, ILMN_2833378, ILMN_1213055, ILMN_2747229, ILMN_1223624, ILMN_2833376, ILMN_1228564, ILMN_2517170, ILMN_2639375, ILMN_2637953, ILMN_2601071, ILMN_1217890, ILMN_3103652	643	86	5738	1.55648	1	0.309285	70.6764
BIOCARTA	m_fcer1Pathway:Fc Epsilon Receptor I Signaling in Mast Cells	8	0.38835	0.151951	ILMN_3028981, ILMN_2920549, ILMN_2649828, ILMN_2601071, ILMN_2971286, ILMN_1213055, ILMN_2747229, ILMN_1223624, ILMN_2957070, ILMN_1215681	166	32	1171	1.76355	1	0.724182	87.5557
KEGG_PATHWAY	mmu04720:Long-term potentiation	12	0.582524	0.153933	ILMN_1217408, ILMN_2649828, ILMN_2971286, ILMN_2833378, ILMN_1213055, ILMN_2747229, ILMN_1223624, ILMN_2833376, ILMN_1215681, ILMN_2637953, ILMN_1250000, ILMN_1217890, ILMN_2601071, ILMN_2705003, ILMN_2953411	643	70	5738	1.52979	1	0.406667	87.1921
KEGG_PATHWAY	mmu04912:GnRH signaling pathway	15	0.728155	0.19169	ILMN_2920549, ILMN_1230007, ILMN_1217408, ILMN_2847004, ILMN_2649828, ILMN_2724570, ILMN_2833378, ILMN_1213055, ILMN_2747229, ILMN_1223624, ILMN_2833376, ILMN_1215681, ILMN_2946862, ILMN_3028981, ILMN_2637953, ILMN_2591066, ILMN_2601071, ILMN_1217890	643	97	5738	1.37997	1	0.457175	92.6933
KEGG_PATHWAY	mmu04916:Melanogenesis	14	0.679612	0.325503	ILMN_2511913, ILMN_3109289, ILMN_1217408, ILMN_2641647, ILMN_2847004, ILMN_2649828, ILMN_2833378, ILMN_1213055, ILMN_2747229, ILMN_1223624, ILMN_2833376, ILMN_2907560, ILMN_1215681, ILMN_1228762, ILMN_2637953, ILMN_2601071, ILMN_1217890	643	100	5738	1.24933	1	0.617182	99.2104
KEGG_PATHWAY	mmu04270:Vascular smooth muscle contraction	15	0.728155	0.476817	ILMN_2920752, ILMN_2742675, ILMN_1217408, ILMN_2710354, ILMN_2847004, ILMN_2649828, ILMN_2833378, ILMN_1213055, ILMN_2747229, ILMN_2833376, ILMN_1215681, ILMN_2662602, ILMN_2746283, ILMN_1228564, ILMN_2637953, ILMN_1217890, ILMN_2601071, ILMN_1254109, ILMN_1219471	643	120	5738	1.11547	1	0.718373	99.9652
Annotation Cluster 142	Enrichment Score: 0.6962621905528942
Category	Term	Count	%	PValue	Genes	List Total	Pop Hits	Pop Total	Fold Enrichment	Bonferroni	Benjamini	FDR
BIOCARTA	m_p27Pathway:Regulation of p27 Phosphorylation during Cell Cycle Progression	5	0.242718	0.0754259	ILMN_2717613, ILMN_1256971, ILMN_2770759, ILMN_1230583, ILMN_2679619, ILMN_2692110	166	12	1171	2.93926	1	0.719968	62.9
BIOCARTA	m_fbw7Pathway:Cyclin E Destruction Pathway	4	0.194175	0.121221	ILMN_2717613, ILMN_2724386, ILMN_2770759, ILMN_2763115, ILMN_2679619, ILMN_2692110	166	9	1171	3.13521	1	0.710428	80.4823
BIOCARTA	m_skp2e2fPathway:E2F1 Destruction Pathway	4	0.194175	0.155981	ILMN_2717613, ILMN_2724386, ILMN_2770759, ILMN_2763115, ILMN_2679619, ILMN_2692110	166	10	1171	2.82169	1	0.721381	88.2831
BIOCARTA	m_g1Pathway:Cell Cycle: G1/S Check Point	6	0.291262	0.269938	ILMN_2717613, ILMN_1255201, ILMN_2938893, ILMN_2466845, ILMN_2770759, ILMN_2679619, ILMN_2692110	166	25	1171	1.69301	1	0.833742	98.1278
BIOCARTA	m_cellcyclePathway:Cyclins and Cell Cycle Regulation	3	0.145631	0.857544	ILMN_2717613, ILMN_2770759, ILMN_2679619, ILMN_2692110	166	23	1171	0.920115	1	0.99669	100
Annotation Cluster 143	Enrichment Score: 0.6950487070182603
Category	Term	Count	%	PValue	Genes	List Total	Pop Hits	Pop Total	Fold Enrichment	Bonferroni	Benjamini	FDR
GOTERM_MF_FAT	GO:0016779~nucleotidyltransferase activity	19	0.92233	0.109149	ILMN_2949886, ILMN_2941033, ILMN_2939303, ILMN_2743494, ILMN_2971481, ILMN_2979430, ILMN_2711442, ILMN_2624135, ILMN_1247048, ILMN_2634720, ILMN_2666438, ILMN_1232593, ILMN_1234905, ILMN_2690306, ILMN_1253779, ILMN_2594477, ILMN_2859978, ILMN_1220586, ILMN_2840296, ILMN_2680066, ILMN_2773302, ILMN_1237667, ILMN_2709047, ILMN_2817892	1385	127	13288	1.43536	1	0.745032	84.1681
KEGG_PATHWAY	mmu00240:Pyrimidine metabolism	16	0.776699	0.112729	ILMN_2959293, ILMN_2743494, ILMN_2959291, ILMN_2971481, ILMN_1259148, ILMN_1221067, ILMN_2761247, ILMN_2603081, ILMN_2453086, ILMN_2624135, ILMN_1247048, ILMN_2932964, ILMN_2634720, ILMN_2971845, ILMN_2666438, ILMN_1234905, ILMN_2690306, ILMN_2840296, ILMN_2680066, ILMN_2709047, ILMN_2817892	643	96	5738	1.4873	1	0.341271	77.0184
GOTERM_MF_FAT	GO:0003899~DNA-directed RNA polymerase activity	7	0.339806	0.151112	ILMN_2666438, ILMN_1234905, ILMN_2949886, ILMN_2690306, ILMN_2971481, ILMN_2743494, ILMN_2680066, ILMN_2624135, ILMN_1247048, ILMN_2634720, ILMN_2709047	1385	35	13288	1.91884	1	0.813411	92.6656
GOTERM_MF_FAT	GO:0034062~RNA polymerase activity	7	0.339806	0.151112	ILMN_2666438, ILMN_1234905, ILMN_2949886, ILMN_2690306, ILMN_2971481, ILMN_2743494, ILMN_2680066, ILMN_2624135, ILMN_1247048, ILMN_2634720, ILMN_2709047	1385	35	13288	1.91884	1	0.813411	92.6656
KEGG_PATHWAY	mmu03020:RNA polymerase	6	0.291262	0.177496	ILMN_2666438, ILMN_1234905, ILMN_2690306, ILMN_2971481, ILMN_2743494, ILMN_2680066, ILMN_2624135, ILMN_1247048, ILMN_2634720, ILMN_2709047	643	27	5738	1.98307	1	0.439929	90.9497
GOTERM_CC_FAT	GO:0000428~DNA-directed RNA polymerase complex	4	0.194175	0.281381	ILMN_2666438, ILMN_1234905, ILMN_2690306, ILMN_2743494, ILMN_2680066, ILMN_2624135, ILMN_2634720	1289	18	12504	2.15568	1	0.742118	99.1695
GOTERM_CC_FAT	GO:0055029~nuclear DNA-directed RNA polymerase complex	4	0.194175	0.281381	ILMN_2666438, ILMN_1234905, ILMN_2690306, ILMN_2743494, ILMN_2680066, ILMN_2624135, ILMN_2634720	1289	18	12504	2.15568	1	0.742118	99.1695
SP_PIR_KEYWORDS	dna-directed rna polymerase	6	0.291262	0.289533	ILMN_2666438, ILMN_1234905, ILMN_2690306, ILMN_2971481, ILMN_2743494, ILMN_2680066, ILMN_2624135, ILMN_1247048, ILMN_2634720, ILMN_2709047	1951	33	17854	1.66386	1	0.778982	99.2709
GOTERM_CC_FAT	GO:0030880~RNA polymerase complex	4	0.194175	0.310771	ILMN_2666438, ILMN_1234905, ILMN_2690306, ILMN_2743494, ILMN_2680066, ILMN_2624135, ILMN_2634720	1289	19	12504	2.04222	1	0.77498	99.5467
GOTERM_CC_FAT	GO:0005665~DNA-directed RNA polymerase II, core complex	3	0.145631	0.315461	ILMN_2666438, ILMN_1234905, ILMN_2690306, ILMN_2743494, ILMN_2624135	1289	11	12504	2.6456	1	0.775996	99.5894
Annotation Cluster 144	Enrichment Score: 0.694324784219085
Category	Term	Count	%	PValue	Genes	List Total	Pop Hits	Pop Total	Fold Enrichment	Bonferroni	Benjamini	FDR
INTERPRO	IPR004843:Metallophosphoesterase	7	0.339806	0.0785448	ILMN_1254380, ILMN_2728521, ILMN_2971286, ILMN_1242053, ILMN_2705003, ILMN_2446175, ILMN_2833772	1876	29	17763	2.28551	1	0.956378	76.1782
UP_SEQ_FEATURE	metal ion-binding site:Iron	9	0.436893	0.201445	ILMN_2738468, ILMN_2971286, ILMN_2756496, ILMN_1242053, ILMN_2705003, ILMN_2774486, ILMN_2960474, ILMN_2711442, ILMN_2833772	1937	47	16021	1.58382	1	0.999982	98.4767
SMART	SM00156:PP2Ac	4	0.194175	0.203636	ILMN_2971286, ILMN_1242053, ILMN_2705003, ILMN_2833772	960	15	9131	2.53639	1	0.865171	95.5702
INTERPRO	IPR006186:Serine/threonine-specific protein phosphatase and bis(5-nucleosyl)-tetraphosphatase	4	0.194175	0.205802	ILMN_2971286, ILMN_1242053, ILMN_2705003, ILMN_2833772	1876	15	17763	2.52495	1	0.994804	98.242
UP_SEQ_FEATURE	region of interest:Catalytic	7	0.339806	0.509095	ILMN_2694962, ILMN_2933431, ILMN_2796199, ILMN_2971286, ILMN_2705003, ILMN_2833772, ILMN_2740407	1937	47	16021	1.23186	1	1	99.9998
Annotation Cluster 145	Enrichment Score: 0.6912315760393574
Category	Term	Count	%	PValue	Genes	List Total	Pop Hits	Pop Total	Fold Enrichment	Bonferroni	Benjamini	FDR
UP_SEQ_FEATURE	repeat:WD 9	9	0.436893	0.0458927	ILMN_2616786, ILMN_2830983, ILMN_2476131, ILMN_2873793, ILMN_2460168, ILMN_2829646, ILMN_2724322, ILMN_1253677, ILMN_2894751	1937	34	16021	2.18939	1	0.994834	58.2661
UP_SEQ_FEATURE	repeat:WD 8	11	0.533981	0.051207	ILMN_2616786, ILMN_2476131, ILMN_1252496, ILMN_2834573, ILMN_2724322, ILMN_1253677, ILMN_2894751, ILMN_2421220, ILMN_2873793, ILMN_2830983, ILMN_2829646, ILMN_2460168, ILMN_2680852	1937	47	16021	1.93577	1	0.996233	62.3843
UP_SEQ_FEATURE	repeat:WD 7	19	0.92233	0.237704	ILMN_3124364, ILMN_1212636, ILMN_1253677, ILMN_2421220, ILMN_2830983, ILMN_2717727, ILMN_2829646, ILMN_2934534, ILMN_2995290, ILMN_2691192, ILMN_2616786, ILMN_2476131, ILMN_1219275, ILMN_1252496, ILMN_1254374, ILMN_2834573, ILMN_2724322, ILMN_2629971, ILMN_2894751, ILMN_2873793, ILMN_2460168, ILMN_2680852, ILMN_2906471, ILMN_2691187, ILMN_2906473, ILMN_1238928, ILMN_2962747	1937	124	16021	1.26734	1	0.999995	99.3582
UP_SEQ_FEATURE	repeat:WD 10	5	0.242718	0.415027	ILMN_2616786, ILMN_2873793, ILMN_2460168, ILMN_2724322, ILMN_2894751	1937	27	16021	1.53167	1	1	99.9953
UP_SEQ_FEATURE	repeat:WD 11	5	0.242718	0.415027	ILMN_2616786, ILMN_2873793, ILMN_2460168, ILMN_2724322, ILMN_2894751	1937	27	16021	1.53167	1	1	99.9953
UP_SEQ_FEATURE	repeat:WD 12	3	0.145631	0.740198	ILMN_2616786, ILMN_2873793, ILMN_2894751	1937	21	16021	1.18158	1	1	100
Annotation Cluster 146	Enrichment Score: 0.6888282179869588
Category	Term	Count	%	PValue	Genes	List Total	Pop Hits	Pop Total	Fold Enrichment	Bonferroni	Benjamini	FDR
SMART	SM00322:KH	8	0.38835	0.108697	ILMN_1245987, ILMN_2974720, ILMN_2734624, ILMN_2449335, ILMN_3003567, ILMN_2590488, ILMN_1258846, ILMN_3117714	960	39	9131	1.95107	1	0.815056	79.3019
INTERPRO	IPR004087:K Homology	8	0.38835	0.111128	ILMN_1245987, ILMN_2974720, ILMN_2734624, ILMN_2449335, ILMN_3003567, ILMN_2590488, ILMN_1258846, ILMN_3117714	1876	39	17763	1.94227	1	0.974771	87.33
INTERPRO	IPR018111:K Homology, type 1, subgroup	7	0.339806	0.128561	ILMN_1245987, ILMN_2974720, ILMN_2734624, ILMN_2449335, ILMN_3003567, ILMN_1258846, ILMN_3117714	1876	33	17763	2.00848	1	0.981388	91.048
UP_SEQ_FEATURE	domain:KH 1	5	0.242718	0.216218	ILMN_1245987, ILMN_2974720, ILMN_2734624, ILMN_3003567, ILMN_3117714	1937	20	16021	2.06776	1	0.999989	98.9237
UP_SEQ_FEATURE	domain:KH 2	5	0.242718	0.216218	ILMN_1245987, ILMN_2974720, ILMN_2734624, ILMN_3003567, ILMN_3117714	1937	20	16021	2.06776	1	0.999989	98.9237
INTERPRO	IPR004088:K Homology, type 1	6	0.291262	0.224457	ILMN_1245987, ILMN_2974720, ILMN_2734624, ILMN_2449335, ILMN_3003567, ILMN_3117714	1876	31	17763	1.83262	1	0.996059	98.8413
UP_SEQ_FEATURE	domain:KH 3	3	0.145631	0.435165	ILMN_1245987, ILMN_2974720, ILMN_3003567	1937	12	16021	2.06776	1	1	99.9976
UP_SEQ_FEATURE	domain:KH	3	0.145631	0.435165	ILMN_2449335, ILMN_2590488, ILMN_1258846	1937	12	16021	2.06776	1	1	99.9976
Annotation Cluster 147	Enrichment Score: 0.6878354760892661
Category	Term	Count	%	PValue	Genes	List Total	Pop Hits	Pop Total	Fold Enrichment	Bonferroni	Benjamini	FDR
GOTERM_BP_FAT	GO:0009896~positive regulation of catabolic process	7	0.339806	0.0302691	ILMN_2739295, ILMN_2912872, ILMN_2655204, ILMN_2987294, ILMN_2992232, ILMN_2594344, ILMN_3018758	1454	23	13588	2.84421	1	0.493701	42.7691
GOTERM_BP_FAT	GO:0009894~regulation of catabolic process	9	0.436893	0.16022	ILMN_2739295, ILMN_2912872, ILMN_2655204, ILMN_2718815, ILMN_2756460, ILMN_2987294, ILMN_2992232, ILMN_2594344, ILMN_3018758	1454	50	13588	1.68215	1	0.867796	95.8015
GOTERM_BP_FAT	GO:0045732~positive regulation of protein catabolic process	4	0.194175	0.182647	ILMN_2912872, ILMN_2655204, ILMN_2987294, ILMN_2594344	1454	14	13588	2.67007	1	0.893616	97.4317
GOTERM_BP_FAT	GO:0031331~positive regulation of cellular catabolic process	3	0.145631	0.412354	ILMN_2739295, ILMN_2992232, ILMN_3018758	1454	13	13588	2.1566	1	0.985193	99.9936
GOTERM_BP_FAT	GO:0042176~regulation of protein catabolic process	5	0.242718	0.451632	ILMN_2912872, ILMN_2655204, ILMN_2718815, ILMN_2987294, ILMN_2594344	1454	32	13588	1.4602	1	0.989867	99.9982
GOTERM_BP_FAT	GO:0031329~regulation of cellular catabolic process	4	0.194175	0.452485	ILMN_2739295, ILMN_2756460, ILMN_2992232, ILMN_3018758	1454	23	13588	1.62526	1	0.989878	99.9982
Annotation Cluster 148	Enrichment Score: 0.6868479211313273
Category	Term	Count	%	PValue	Genes	List Total	Pop Hits	Pop Total	Fold Enrichment	Bonferroni	Benjamini	FDR
PIR_SUPERFAMILY	PIRSF001569:E3 ubiquitin-protein ligase, Nedd4/Rsp5p types	4	0.194175	0.0150896	ILMN_3163529, ILMN_2878501, ILMN_3005669, ILMN_2594344	801	6	8136	6.77154	0.999999	0.999054	21.1435
UP_SEQ_FEATURE	domain:WW 3	4	0.194175	0.0618219	ILMN_3163529, ILMN_2878501, ILMN_3005669, ILMN_2594344	1937	8	16021	4.13552	1	0.997825	69.4873
UP_SEQ_FEATURE	domain:C2	11	0.533981	0.303609	ILMN_2889313, ILMN_2637953, ILMN_2731197, ILMN_1228349, ILMN_1217890, ILMN_3163529, ILMN_2878501, ILMN_2645613, ILMN_2768805, ILMN_3005669, ILMN_2594344	1937	68	16021	1.33796	1	0.999999	99.8806
SMART	SM00239:C2	14	0.679612	0.617389	ILMN_2889313, ILMN_1228349, ILMN_3163529, ILMN_2878501, ILMN_2516899, ILMN_2818246, ILMN_2645613, ILMN_3127335, ILMN_2637953, ILMN_2731197, ILMN_1217890, ILMN_2768805, ILMN_3005669, ILMN_2594344	960	130	9131	1.02431	1	0.982998	99.9998
INTERPRO	IPR000008:C2 calcium-dependent membrane targeting	14	0.679612	0.624253	ILMN_2889313, ILMN_1228349, ILMN_3163529, ILMN_2878501, ILMN_2516899, ILMN_2818246, ILMN_2645613, ILMN_3127335, ILMN_2637953, ILMN_2731197, ILMN_1217890, ILMN_2768805, ILMN_3005669, ILMN_2594344	1876	130	17763	1.01969	1	0.999996	100
INTERPRO	IPR018029:C2 membrane targeting protein	11	0.533981	0.693201	ILMN_2889313, ILMN_3127335, ILMN_2637953, ILMN_1228349, ILMN_1217890, ILMN_3163529, ILMN_2878501, ILMN_2818246, ILMN_2645613, ILMN_3005669, ILMN_2594344	1876	106	17763	0.982585	1	0.999999	100
Annotation Cluster 149	Enrichment Score: 0.6818904275834955
Category	Term	Count	%	PValue	Genes	List Total	Pop Hits	Pop Total	Fold Enrichment	Bonferroni	Benjamini	FDR
GOTERM_BP_FAT	GO:0048557~embryonic digestive tract morphogenesis	4	0.194175	0.104814	ILMN_2641647, ILMN_2609887, ILMN_3131909, ILMN_2637757	1454	11	13588	3.39827	1	0.786255	86.6062
GOTERM_BP_FAT	GO:0048546~digestive tract morphogenesis	7	0.339806	0.134467	ILMN_2511913, ILMN_2938893, ILMN_2641647, ILMN_1228414, ILMN_2609887, ILMN_3131909, ILMN_2637757	1454	33	13588	1.98233	1	0.837428	92.7342
GOTERM_BP_FAT	GO:0048547~gut morphogenesis	6	0.291262	0.137997	ILMN_2511913, ILMN_2938893, ILMN_2641647, ILMN_1228414, ILMN_3131909, ILMN_2637757	1454	26	13588	2.1566	1	0.841092	93.254
GOTERM_BP_FAT	GO:0055123~digestive system development	7	0.339806	0.149419	ILMN_2511913, ILMN_2938893, ILMN_2641647, ILMN_1228414, ILMN_2609887, ILMN_3131909, ILMN_2637757	1454	34	13588	1.92402	1	0.857017	94.7049
GOTERM_BP_FAT	GO:0007439~ectodermal gut development	4	0.194175	0.182647	ILMN_2511913, ILMN_2938893, ILMN_2641647, ILMN_1228414	1454	14	13588	2.67007	1	0.893616	97.4317
GOTERM_BP_FAT	GO:0048567~ectodermal gut morphogenesis	4	0.194175	0.182647	ILMN_2511913, ILMN_2938893, ILMN_2641647, ILMN_1228414	1454	14	13588	2.67007	1	0.893616	97.4317
GOTERM_BP_FAT	GO:0048565~gut development	6	0.291262	0.406157	ILMN_2511913, ILMN_2938893, ILMN_2641647, ILMN_1228414, ILMN_3131909, ILMN_2637757	1454	39	13588	1.43773	1	0.984554	99.9922
GOTERM_BP_FAT	GO:0048562~embryonic organ morphogenesis	14	0.679612	0.890532	ILMN_1215252, ILMN_2886828, ILMN_2641647, ILMN_2609887, ILMN_2685329, ILMN_2837476, ILMN_2645439, ILMN_2832641, ILMN_2938893, ILMN_1218037, ILMN_1228414, ILMN_3131909, ILMN_2637757, ILMN_2993711	1454	161	13588	0.812631	1	0.999987	100
Annotation Cluster 150	Enrichment Score: 0.6777861911018309
Category	Term	Count	%	PValue	Genes	List Total	Pop Hits	Pop Total	Fold Enrichment	Bonferroni	Benjamini	FDR
COG_ONTOLOGY	Intracellular trafficking and secretion	11	0.533981	0.0202151	ILMN_2764995, ILMN_2822053, ILMN_2865558, ILMN_3135931, ILMN_2644632, ILMN_2596412, ILMN_1216919, ILMN_2422410, ILMN_2864844, ILMN_1255725, ILMN_2814976, ILMN_2464553, ILMN_2594971, ILMN_1246405	247	41	2040	2.21586	0.539777	0.321603	16.8532
GOTERM_BP_FAT	GO:0006904~vesicle docking during exocytosis	4	0.194175	0.240817	ILMN_2644632, ILMN_2864844, ILMN_2422410, ILMN_2814976, ILMN_2865558, ILMN_1246405	1454	16	13588	2.33631	1	0.936562	99.3278
INTERPRO	IPR001619:Sec1-like protein	3	0.145631	0.244387	ILMN_2644632, ILMN_2864844, ILMN_2422410, ILMN_2865558	1876	9	17763	3.15618	1	0.997225	99.266
GOTERM_BP_FAT	GO:0022406~membrane docking	4	0.194175	0.270953	ILMN_2644632, ILMN_2864844, ILMN_2422410, ILMN_2814976, ILMN_2865558, ILMN_1246405	1454	17	13588	2.19888	1	0.949581	99.6778
GOTERM_BP_FAT	GO:0048278~vesicle docking	4	0.194175	0.270953	ILMN_2644632, ILMN_2864844, ILMN_2422410, ILMN_2814976, ILMN_2865558, ILMN_1246405	1454	17	13588	2.19888	1	0.949581	99.6778
GOTERM_BP_FAT	GO:0006887~exocytosis	7	0.339806	0.981869	ILMN_2644632, ILMN_3127335, ILMN_2822053, ILMN_2864844, ILMN_2422410, ILMN_2814976, ILMN_2865558, ILMN_1246405, ILMN_2777284	1454	110	13588	0.594698	1	1	100
Annotation Cluster 151	Enrichment Score: 0.6747853216274443
Category	Term	Count	%	PValue	Genes	List Total	Pop Hits	Pop Total	Fold Enrichment	Bonferroni	Benjamini	FDR
GOTERM_MF_FAT	GO:0034450~ubiquitin-ubiquitin ligase activity	3	0.145631	0.122498	ILMN_2635377, ILMN_2935999, ILMN_2934534	1385	6	13288	4.79711	1	0.768843	87.5558
UP_SEQ_FEATURE	domain:U-box	3	0.145631	0.157422	ILMN_2635377, ILMN_2935999, ILMN_2934534	1937	6	16021	4.13552	1	0.999932	95.8668
GOTERM_BP_FAT	GO:0000209~protein polyubiquitination	4	0.194175	0.270953	ILMN_2761459, ILMN_2635377, ILMN_2935999, ILMN_2934534	1454	17	13588	2.19888	1	0.949581	99.6778
SMART	SM00504:Ubox	3	0.145631	0.28341	ILMN_2635377, ILMN_2935999, ILMN_2934534	960	10	9131	2.85344	1	0.89975	98.9555
INTERPRO	IPR003613:U box domain	3	0.145631	0.285477	ILMN_2635377, ILMN_2935999, ILMN_2934534	1876	10	17763	2.84057	1	0.998312	99.7247
Annotation Cluster 152	Enrichment Score: 0.6682816046307464
Category	Term	Count	%	PValue	Genes	List Total	Pop Hits	Pop Total	Fold Enrichment	Bonferroni	Benjamini	FDR
GOTERM_BP_FAT	GO:0000041~transition metal ion transport	12	0.582524	0.123587	ILMN_1257428, ILMN_1254437, ILMN_2606579, ILMN_2665063, ILMN_2696610, ILMN_2632073, ILMN_2994779, ILMN_2668706, ILMN_2603540, ILMN_2432508, ILMN_2710784, ILMN_1244848, ILMN_2812926, ILMN_1256917	1454	70	13588	1.60204	1	0.822127	90.8846
SP_PIR_KEYWORDS	zinc transport	5	0.242718	0.190452	ILMN_2668706, ILMN_2603540, ILMN_2432508, ILMN_1256917, ILMN_2812926	1951	21	17854	2.17886	1	0.662736	95.2244
GOTERM_BP_FAT	GO:0006829~zinc ion transport	5	0.242718	0.203244	ILMN_2668706, ILMN_2603540, ILMN_2432508, ILMN_1256917, ILMN_2812926	1454	22	13588	2.12392	1	0.912874	98.3842
INTERPRO	IPR003689:Zinc/iron permease	3	0.145631	0.443706	ILMN_2668706, ILMN_2603540, ILMN_2432508	1876	14	17763	2.02898	1	0.999834	99.9966
Annotation Cluster 153	Enrichment Score: 0.6592505910753967
Category	Term	Count	%	PValue	Genes	List Total	Pop Hits	Pop Total	Fold Enrichment	Bonferroni	Benjamini	FDR
GOTERM_BP_FAT	GO:0048534~hemopoietic or lymphoid organ development	40	1.94175	0.0534363	ILMN_1215252, ILMN_2936380, ILMN_2763602, ILMN_2792268, ILMN_2792267, ILMN_2945275, ILMN_2991107, ILMN_2655204, ILMN_2701501, ILMN_2659229, ILMN_2665063, ILMN_3121255, ILMN_2592476, ILMN_3155789, ILMN_2893077, ILMN_2594718, ILMN_1245609, ILMN_2749937, ILMN_3005669, ILMN_2749717, ILMN_2941992, ILMN_1213290, ILMN_2960750, ILMN_2466845, ILMN_2768755, ILMN_3052632, ILMN_2852034, ILMN_2865558, ILMN_12…	1454	281	13588	1.33029	1	0.618989	63.1057
GOTERM_BP_FAT	GO:0030097~hemopoiesis	36	1.74757	0.061057	ILMN_1215252, ILMN_2936380, ILMN_2763602, ILMN_2792268, ILMN_2792267, ILMN_2991107, ILMN_2655204, ILMN_2701501, ILMN_2659229, ILMN_2665063, ILMN_3121255, ILMN_3155789, ILMN_2893077, ILMN_2594718, ILMN_1245609, ILMN_2749937, ILMN_3005669, ILMN_2749717, ILMN_2941992, ILMN_1213290, ILMN_2960750, ILMN_2466845, ILMN_2768755, ILMN_3052632, ILMN_2852034, ILMN_2865558, ILMN_1247147, ILMN_2780759, ILMN_12…	1454	251	13588	1.34036	1	0.651926	68.142
GOTERM_BP_FAT	GO:0002520~immune system development	41	1.99029	0.0683088	ILMN_1215252, ILMN_2936380, ILMN_2763602, ILMN_2792268, ILMN_2792267, ILMN_2945275, ILMN_2991107, ILMN_2655204, ILMN_2701501, ILMN_2659229, ILMN_2665063, ILMN_3121255, ILMN_2592476, ILMN_3155789, ILMN_2893077, ILMN_2594718, ILMN_1245609, ILMN_2749937, ILMN_3005669, ILMN_2749717, ILMN_2941992, ILMN_1213290, ILMN_2960750, ILMN_2466845, ILMN_2768755, ILMN_3052632, ILMN_2852034, ILMN_2865558, ILMN_12…	1454	295	13588	1.29883	1	0.674148	72.3255
GOTERM_BP_FAT	GO:0002521~leukocyte differentiation	21	1.01942	0.121407	ILMN_2941992, ILMN_2749717, ILMN_2960750, ILMN_1213290, ILMN_2466845, ILMN_2768755, ILMN_2991107, ILMN_1247147, ILMN_2655204, ILMN_2780759, ILMN_2701501, ILMN_2659229, ILMN_1229957, ILMN_2659160, ILMN_2623867, ILMN_2893077, ILMN_1252078, ILMN_2594718, ILMN_2976191, ILMN_2705003, ILMN_3097868, ILMN_3005669	1454	142	13588	1.38204	1	0.81877	90.4639
GOTERM_BP_FAT	GO:0030217~T cell differentiation	12	0.582524	0.185159	ILMN_2749717, ILMN_2893077, ILMN_2466845, ILMN_2594718, ILMN_2991107, ILMN_2655204, ILMN_2976191, ILMN_2780759, ILMN_2701501, ILMN_2659229, ILMN_2705003, ILMN_3005669	1454	76	13588	1.47557	1	0.895584	97.5713
GOTERM_BP_FAT	GO:0030098~lymphocyte differentiation	16	0.776699	0.234817	ILMN_2749717, ILMN_1213290, ILMN_2466845, ILMN_2768755, ILMN_2991107, ILMN_2655204, ILMN_2701501, ILMN_2780759, ILMN_2659229, ILMN_1229957, ILMN_2659160, ILMN_2893077, ILMN_1252078, ILMN_2594718, ILMN_2976191, ILMN_2705003, ILMN_3005669	1454	114	13588	1.31161	1	0.933063	99.2245
GOTERM_BP_FAT	GO:0033077~T cell differentiation in the thymus	6	0.291262	0.253228	ILMN_2893077, ILMN_2466845, ILMN_2594718, ILMN_2655204, ILMN_2976191, ILMN_2701501	1454	32	13588	1.75224	1	0.941775	99.5017
GOTERM_BP_FAT	GO:0042110~T cell activation	16	0.776699	0.255991	ILMN_2941992, ILMN_2749717, ILMN_2466845, ILMN_2991107, ILMN_2655204, ILMN_2701501, ILMN_2780759, ILMN_2659229, ILMN_2893077, ILMN_2938893, ILMN_1216871, ILMN_2594718, ILMN_2976191, ILMN_2705003, ILMN_2776025, ILMN_3005669	1454	116	13588	1.289	1	0.943352	99.5341
GOTERM_BP_FAT	GO:0030183~B cell differentiation	7	0.339806	0.368735	ILMN_2749717, ILMN_1213290, ILMN_2466845, ILMN_2768755, ILMN_2594718, ILMN_1252078, ILMN_2991107, ILMN_2659160	1454	46	13588	1.4221	1	0.978785	99.9764
GOTERM_BP_FAT	GO:0046649~lymphocyte activation	23	1.1165	0.389095	ILMN_2941992, ILMN_2749717, ILMN_1213290, ILMN_2466845, ILMN_2768755, ILMN_2991107, ILMN_2655204, ILMN_2780759, ILMN_2701501, ILMN_2659229, ILMN_1229957, ILMN_2659160, ILMN_2893077, ILMN_2832675, ILMN_2938893, ILMN_2652384, ILMN_1216871, ILMN_1252078, ILMN_2594718, ILMN_2976191, ILMN_2704499, ILMN_2705003, ILMN_2776025, ILMN_3005669	1454	191	13588	1.12534	1	0.982289	99.987
GOTERM_BP_FAT	GO:0045321~leukocyte activation	24	1.16505	0.56955	ILMN_2991107, ILMN_2701501, ILMN_2655204, ILMN_2659229, ILMN_2893077, ILMN_2832675, ILMN_2594718, ILMN_1216871, ILMN_2776025, ILMN_3005669, ILMN_2749717, ILMN_2941992, ILMN_1213290, ILMN_2960750, ILMN_2466845, ILMN_2768755, ILMN_2780759, ILMN_1229957, ILMN_2659160, ILMN_2938893, ILMN_2652384, ILMN_1252078, ILMN_2976191, ILMN_2704499, ILMN_2705003	1454	219	13588	1.02414	1	0.996244	100
GOTERM_BP_FAT	GO:0042113~B cell activation	9	0.436893	0.604177	ILMN_2749717, ILMN_1213290, ILMN_2832675, ILMN_2466845, ILMN_2768755, ILMN_2652384, ILMN_2594718, ILMN_1252078, ILMN_2991107, ILMN_2659160	1454	78	13588	1.0783	1	0.997256	100
[truncated: 2,187 more rows]

## Sheet: 2. Chronic Rapa-2 male down
Annotation Cluster 1	Enrichment Score: 17.608829956662426
Category	Term	Count	%	PValue	Genes	List Total	Pop Hits	Pop Total	Fold Enrichment	Bonferroni	Benjamini	FDR
[truncated: 3,642 more rows]

## Sheet: 3. Chronic Rapa female up
Annotation Cluster 1	Enrichment Score: 41.62686227696781
Category	Term	Count	%	PValue	Genes	List Total	Pop Hits	Pop Total	Fold Enrichment	Bonferroni	Benjamini	FDR
[truncated: 4,040 more rows]

## Sheet: 4. Chronic Rapa female down
Annotation Cluster 1	Enrichment Score: 12.224542354545239
[truncated: 4,045 more rows]

## Sheet: 5. 6-Months Rapa Female Up
Annotation Cluster 1	Enrichment Score: 12.488017679460583
[truncated: 1,798 more rows]

## Sheet: 6. 6-Months Rapa Female down
Annotation Cluster 1	Enrichment Score: 14.100767036582585
[truncated: 1,809 more rows]
